# Supplementary material
Source: publisher site journal article supplement (https://www.dovepress.com/article/381027)
Supplement: Supplementary file 1 [file get_supplementary_file.php]

## Supplementary Description

### Supplementary File S1

The medical data extracted from the database of TCGA-GDC includes information about sex, age, OS, grade, stage, distant metastasis, and metastasis of lymph node.

### Supplementary File S2

The autophagy-related genes expression profiles extracted from the database of GSEA.

### Supplementary File S3

Use Pearson correlation analysis to screen out autophagy-related lncRNAs from clinical data.

### Supplementary File S4

Univariate Cox regression analysis in combination with the clinical survival data revealed the significant correlation of 20 lncRNAs with survival time.

### Supplementary File S1

| Id           | futime | fustat | age | gender | grade | stage     | T   | M      | N  |
|--------------|--------|--------|-----|--------|-------|-----------|-----|--------|----|
| TCGA-CJ-4916 | 1373   | 0      | 69  | FEMALE | G3    | Stage III | T3a | M0     | NX |
| TCGA-B8-A8YJ | 431    | 0      | 60  | FEMALE | G2    | Stage I   | T1b | unknow | NX |
| TCGA-CJ-5678 | 574    | 1      | 62  | MALE   | G3    | Stage IV  | T2b | M1     | N0 |
| TCGA-BP-5190 | 1011   | 0      | 61  | MALE   | G3    | Stage I   | T1a | M0     | NX |
| TCGA-B0-4718 | 616    | 0      | 57  | MALE   | G2    | Stage III | T3a | M0     | NX |
| TCGA-CJ-5679 | 679    | 1      | 73  | MALE   | G4    | Stage III | T3b | M0     | NX |
| TCGA-BP-4165 | 3037   | 0      | 64  | FEMALE | G1    | Stage I   | T1b | M0     | N0 |
| TCGA-B0-5075 | 637    | 1      | 77  | FEMALE | G2    | Stage III | T3a | M0     | N0 |
| TCGA-BP-4774 | 1885   | 0      | 57  | FEMALE | G2    | Stage I   | T1a | M0     | NX |
| TCGA-B0-5084 | 222    | 1      | 33  | MALE   | G3    | Stage IV  | T3a | M1     | N1 |
| TCGA-B2-3924 | 371    | 0      | 73  | MALE   | G2    | Stage I   | T1b | M0     | NX |
| TCGA-BP-4160 | 2881   | 0      | 67  | MALE   | G2    | Stage III | T3a | M0     | N0 |
| TCGA-BP-5200 | 1063   | 0      | 44  | MALE   | G4    | Stage II  | T2  | M0     | NX |
| TCGA-B0-4814 | 168    | 1      | 58  | MALE   | G3    | Stage IV  | T4  | M1     | N0 |
| TCGA-B8-5159 | 240    | 0      | 61  | FEMALE | G3    | Stage I   | T1a | M0     | N0 |
| TCGA-B4-5377 | 365    | 0      | 68  | FEMALE | G3    | Stage IV  | T3  | M1     | N0 |
| TCGA-BP-4758 | 2208   | 0      | 40  | MALE   | G2    | Stage I   | T1a | M0     | NX |
| TCGA-B0-5400 | 1132   | 0      | 59  | FEMALE | G4    | Stage III | T3b | M0     | N0 |
| TCGA-AK-3427 | 2566   | 0      | 65  | MALE   | GX    | Stage I   | T1a | M0     | N0 |
| TCGA-BP-4342 | 2256   | 1      | 79  | MALE   | G3    | Stage II  | T2  | M0     | N0 |
| TCGA-BP-4354 | 1034   | 1      | 40  | MALE   | G4    | Stage IV  | T4  | M1     | N1 |
| TCGA-CZ-5451 | 1668   | 0      | 74  | MALE   | G3    | Stage II  | T2  | M0     | N0 |
| TCGA-B8-4148 | 379    | 0      | 63  | FEMALE | G3    | Stage I   | T1a | M0     | N0 |
| TCGA-6D-AA2E | 362    | 0      | 68  | FEMALE | G2    | Stage I   | T1b | MX     | NX |
| TCGA-CZ-5458 | 1558   | 0      | 43  | MALE   | G3    | Stage III | T3a | M0     | NX |

|                  |      |    |        |        |           |          |     |    |    |
|------------------|------|----|--------|--------|-----------|----------|-----|----|----|
| TCGA-MM-A564     | 607  | 0  | 68     | MALE   | G2        | Stage II | T2a | MX | NX |
| TCGA-B0-50771317 | 1    | 77 | MALE   | G3     | Stage I   | T1a      | M0  | N0 |    |
| TCGA-B4-5838166  | 0    | 52 | MALE   | G2     | unknow    | T3       | M0  | N1 |    |
| TCGA-B0-5117535  | 0    | 40 | MALE   | G2     | Stage I   | T1b      | M0  | NX |    |
| TCGA-B8-A54G     | 53   | 0  | 50     | MALE   | G3        | Stage I  | T1a | MX | NX |
| TCGA-AK-3430480  | 1    | 61 | MALE   | G3     | Stage III | T3b      | M0  | N1 |    |
| TCGA-B0-4701238  | 1    | 66 | FEMALE | G3     | Stage IV  | T3a      | M1  | N0 |    |
| TCGA-BP-49621785 | 0    | 58 | MALE   | G2     | Stage II  | T2       | M0  | NX |    |
| TCGA-BP-49631834 | 0    | 63 | MALE   | G3     | Stage I   | T1b      | M0  | NX |    |
| TCGA-BP-41623074 | 0    | 65 | FEMALE | G2     | Stage I   | T1b      | M0  | N0 |    |
| TCGA-CJ-49001714 | 1    | 69 | FEMALE | G4     | Stage IV  | T4       | M1  | N1 |    |
| TCGA-CW-5580     | 1964 | 1  | 73     | FEMALE | G3        | Stage IV | T3a | M1 | NX |
| TCGA-B0-481318   | 1    | 68 | MALE   | G3     | Stage III | T3b      | M0  | NX |    |
| TCGA-BP-4803204  | 0    | 79 | MALE   | G3     | Stage III | T3a      | M0  | NX |    |
| TCGA-AK-34431423 | 0    | 45 | MALE   | GX     | Stage II  | T2       | M0  | N0 |    |
| TCGA-B0-5109587  | 1    | 69 | MALE   | G4     | Stage III | T3b      | M0  | N1 |    |
| TCGA-A3-33071436 | 0    | 66 | MALE   | G3     | Stage III | T3b      | M0  | N0 |    |
| TCGA-B0-51001913 | 1    | 72 | MALE   | G3     | Stage III | T3a      | M0  | NX |    |
| TCGA-BP-41612746 | 0    | 74 | MALE   | G3     | Stage I   | T1b      | M0  | NX |    |
| TCGA-BP-5010878  | 1    | 63 | MALE   | G4     | Stage III | T3a      | M0  | N0 |    |
| TCGA-BP-51681463 | 1    | 75 | MALE   | G2     | Stage I   | T1a      | M0  | NX |    |
| TCGA-A3-33231106 | 0    | 53 | MALE   | G1     | Stage I   | T1b      | M0  | NX |    |
| TCGA-CJ-5677782  | 1    | 54 | FEMALE | G4     | Stage IV  | T3a      | M1  | NX |    |
| TCGA-A3-33351886 | 0    | 41 | MALE   | G4     | Stage II  | T2a      | M0  | N0 |    |
| TCGA-B2-5633358  | 0    | 56 | MALE   | G2     | Stage I   | T1b      | M0  | N0 |    |
| TCGA-BP-43261625 | 1    | 53 | FEMALE | G2     | Stage I   | T1b      | M0  | N0 |    |
| TCGA-T7-A92I     | 356  | 0  | 47     | FEMALE | G1        | Stage I  | T1a | MX | NX |
| TCGA-BP-41592601 | 1    | 70 | MALE   | G2     | Stage I   | T1b      | M0  | N0 |    |
| TCGA-A3-33851993 | 0    | 46 | FEMALE | G2     | Stage I   | T1a      | M0  | N0 |    |
| TCGA-B8-4153405  | 0    | 74 | MALE   | G3     | Stage III | T3a      | M0  | NX |    |
| TCGA-A3-33191130 | 0    | 70 | MALE   | G2     | Stage I   | T1b      | M0  | NX |    |
| TCGA-B2-5639417  | 0    | 46 | MALE   | G3     | Stage IV  | T3       | M1  | NX |    |
| TCGA-BP-4974211  | 1    | 58 | MALE   | G4     | Stage IV  | T3a      | M1  | N0 |    |
| TCGA-BP-4355953  | 1    | 59 | FEMALE | G4     | Stage III | T3a      | M0  | NX |    |
| TCGA-A3-33241186 | 0    | 51 | MALE   | G3     | Stage I   | T1b      | M0  | NX |    |
| TCGA-B0-56913431 | 0    | 66 | FEMALE | G3     | Stage I   | T1a      | M0  | N0 |    |
| TCGA-CJ-48841759 | 0    | 72 | FEMALE | G3     | Stage III | T3a      | M0  | NX |    |
| TCGA-B0-57122722 | 0    | 68 | FEMALE | G3     | Stage IV  | T2       | M1  | N0 |    |
| TCGA-B0-57131865 | 0    | 75 | FEMALE | G3     | Stage III | T3b      | M0  | N0 |    |
| TCGA-BP-47652184 | 0    | 43 | MALE   | G2     | Stage I   | T1a      | M0  | NX |    |
| TCGA-AK-34581168 | 0    | 48 | MALE   | G3     | Stage I   | T1b      | M0  | NX |    |
| TCGA-B4-5378175  | 0    | 62 | MALE   | G2     | Stage I   | T1       | M0  | N0 |    |
| TCGA-B4-583516   | 0    | 64 | FEMALE | G2     | Stage I   | T1       | M0  | N0 |    |
| TCGA-B0-57031203 | 0    | 73 | MALE   | G3     | Stage I   | T1b      | M0  | N0 |    |

|                   |      |    |        |        |           |         |     |    |    |
|-------------------|------|----|--------|--------|-----------|---------|-----|----|----|
| TCGA-A3-33161493  | 0    | 57 | MALE   | G3     | Stage II  | T2      | M0  | NX |    |
| TCGA-CJ-4912 1657 | 0    | 61 | MALE   | G3     | Stage II  | T2      | M0  | NX |    |
| TCGA-B0-5097665   | 0    | 59 | FEMALE | G2     | Stage III | T3b     | M0  | N0 |    |
| TCGA-B8-4151280   | 0    | 51 | FEMALE | G2     | Stage III | T3a     | M0  | N0 |    |
| TCGA-DV-5569      | 355  | 0  | 29     | FEMALE | G2        | Stage I | T1a | M0 | NX |
| TCGA-BP-5184 1133 | 0    | 54 | MALE   | G3     | Stage I   | T1a     | M0  | NX |    |
| TCGA-CJ-4889 1946 | 0    | 63 | FEMALE | G4     | Stage I   | T1a     | M0  | NX |    |
| TCGA-A3-330816    | 0    | 77 | FEMALE | G2     | Stage III | T3b     | M0  | N0 |    |
| TCGA-AK-34561143  | 0    | 48 | MALE   | G3     | Stage II  | T2      | M0  | N0 |    |
| TCGA-B0-49452145  | 1    | 75 | FEMALE | G2     | Stage I   | T1a     | M0  | N0 |    |
| TCGA-CZ-5470      | 0    | 72 | FEMALE | G3     | Stage II  | T2      | M0  | N0 |    |
| TCGA-CJ-4878 2186 | 0    | 71 | FEMALE | G2     | Stage III | T3a     | M0  | NX |    |
| TCGA-AK-34342087  | 0    | 72 | MALE   | G2     | Stage I   | T1b     | M0  | NX |    |
| TCGA-B8-5550434   | 0    | 71 | MALE   | G3     | Stage III | T3a     | M0  | N0 |    |
| TCGA-A3-33592504  | 0    | 82 | FEMALE | G2     | Stage I   | T1a     | M0  | N0 |    |
| TCGA-B0-4697578   | 1    | 46 | FEMALE | G4     | Stage IV  | T3b     | M1  | NX |    |
| TCGA-CZ-4866 1768 | 0    | 79 | FEMALE | G3     | Stage I   | T1      | M0  | NX |    |
| TCGA-B0-5701 1732 | 0    | 65 | MALE   | G4     | Stage III | T3b     | M0  | N0 |    |
| TCGA-A3-3343945   | 0    | 79 | MALE   | G3     | Stage II  | T2      | M0  | N0 |    |
| TCGA-DV-5574      | 723  | 0  | 37     | MALE   | G2        | Stage I | T1a | M0 | NX |
| TCGA-B0-4713 202  | 1    | 76 | FEMALE | G2     | Stage III | T3b     | M0  | NX |    |
| TCGA-B0-509668    | 1    | 72 | FEMALE | GX     | Stage III | T3a     | M0  | N1 |    |
| TCGA-B8-A54F519   | 0    | 49 | FEMALE | G2     | Stage I   | T1a     | MX  | NX |    |
| TCGA-BP-4775 1843 | 0    | 55 | FEMALE | G2     | Stage I   | T1a     | M0  | NX |    |
| TCGA-A3-33761696  | 1    | 51 | MALE   | G2     | Stage I   | T1a     | M0  | N0 |    |
| TCGA-B0-5085 770  | 1    | 76 | FEMALE | G3     | Stage III | T3a     | M0  | N0 |    |
| TCGA-BP-4177 1670 | 0    | 65 | MALE   | G2     | Stage I   | T1a     | M0  | NX |    |
| TCGA-CZ-4862 1843 | 0    | 46 | MALE   | G2     | Stage I   | T1b     | M0  | NX |    |
| TCGA-B0-5115 797  | 0    | 43 | MALE   | G3     | Stage IV  | T2      | M1  | N0 |    |
| TCGA-BP-4965 1871 | 0    | 46 | MALE   | G2     | Stage I   | T1a     | M0  | NX |    |
| TCGA-A3-3351910   | 0    | 42 | MALE   | G2     | Stage II  | T2a     | M0  | N0 |    |
| TCGA-DV-5573      | 1130 | 0  | 41     | MALE   | G2        | Stage I | T1a | M0 | NX |
| TCGA-CZ-5464 1492 | 0    | 69 | MALE   | G2     | Stage IV  | T3b     | M1  | NX |    |
| TCGA-CJ-4871 2423 | 0    | 63 | MALE   | G4     | Stage IV  | T3a     | M1  | NX |    |
| TCGA-BP-5000563   | 0    | 40 | MALE   | G3     | Stage I   | T1b     | M0  | NX |    |
| TCGA-B0-4703 182  | 1    | 51 | MALE   | G4     | Stage IV  | T3a     | M1  | N0 |    |
| TCGA-CZ-5468 59   | 1    | 84 | MALE   | G4     | Stage IV  | T3b     | M1  | NX |    |
| TCGA-AK-34501508  | 0    | 85 | FEMALE | G2     | Stage I   | T1a     | M0  | N0 |    |
| TCGA-B0-4827885   | 1    | 77 | FEMALE | G4     | Stage III | T3b     | M0  | N0 |    |
| TCGA-BP-4756374   | 0    | 62 | FEMALE | G2     | Stage I   | T1b     | M0  | N0 |    |
| TCGA-B0-5080342   | 1    | 63 | MALE   | G3     | Stage IV  | T3a     | M1  | N0 |    |
| TCGA-CZ-4860 206  | 1    | 60 | MALE   | G4     | Stage IV  | T4      | M1  | NX |    |
| TCGA-CZ-5455 561  | 1    | 63 | MALE   | G4     | Stage IV  | T3b     | M1  | NX |    |
| TCGA-BP-4995 1371 | 0    | 68 | MALE   | G3     | Stage I   | T1b     | M0  | N0 |    |

|                 |      |    |      |        |           |           |     |    |    |
|-----------------|------|----|------|--------|-----------|-----------|-----|----|----|
| TCGA-B0-5116657 | 0    | 52 | MALE | G3     | Stage III | T3b       | M0  | N0 |    |
| TCGA-CJ-4641    | 1661 | 1  | 55   | FEMALE | G4        | Stage IV  | T3a | M1 | NX |
| TCGA-BP-4982    | 1014 | 0  | 42   | MALE   | G3        | Stage I   | T1b | M0 | NX |
| TCGA-AS-3777    | 1238 | 0  | 63   | MALE   | unknow    | Stage I   | T1a | M0 | NX |
| TCGA-BP-4977    | 454  | 0  | 57   | MALE   | G3        | Stage I   | T1b | M0 | NX |
| TCGA-B0-4816    | 1371 | 1  | 49   | MALE   | G3        | Stage II  | T2  | M0 | N0 |
| TCGA-CZ-5459    | 1515 | 0  | 63   | MALE   | G3        | Stage III | T3b | M0 | NX |
| TCGA-BP-5192    | 714  | 0  | 59   | MALE   | G2        | Stage I   | T1a | M0 | NX |
| TCGA-B0-4714    | 99   | 1  | 81   | MALE   | G3        | Stage IV  | T3b | M1 | NX |
| TCGA-CZ-5453    | 25   | 0  | 67   | MALE   | G2        | Stage II  | T2  | M0 | NX |
| TCGA-BP-5178    | 1912 | 1  | 71   | MALE   | G4        | Stage IV  | T3a | M1 | NX |
| TCGA-3Z-A93Z    | 385  | 0  | 69   | MALE   | G2        | Stage I   | T1a | M0 | N0 |
| TCGA-B0-4852    | 1121 | 1  | 78   | FEMALE | G2        | Stage II  | T2  | M0 | N0 |
| TCGA-B0-4815    | 1588 | 1  | 65   | MALE   | G4        | Stage III | T3a | M0 | NX |
| TCGA-CJ-4875    | 2353 | 0  | 67   | MALE   | G3        | Stage IV  | T3a | M1 | NX |
| TCGA-A3-3306    | 1120 | 0  | 67   | MALE   | G3        | Stage I   | T1b | M0 | N0 |
| TCGA-AS-3778    | 43   | 0  | 35   | MALE   | G1        | Stage I   | T1a | M0 | NX |
| TCGA-CW-5587    | 2226 | 0  | 62   | FEMALE | G2        | Stage III | T3b | M0 | N0 |
| TCGA-CJ-4907    | 1499 | 0  | 58   | MALE   | G3        | Stage III | T3b | M0 | NX |
| TCGA-A3-3328    | 1385 | 0  | 79   | MALE   | G2        | Stage I   | T1b | M0 | N0 |
| TCGA-AK-3451    | 1481 | 0  | 48   | MALE   | G3        | Stage II  | T2  | M0 | N0 |
| TCGA-BP-5185    | 1132 | 0  | 56   | MALE   | G3        | Stage I   | T1a | M0 | NX |
| TCGA-BP-4762    | 1343 | 1  | 42   | MALE   | G3        | Stage I   | T1a | M0 | NX |
| TCGA-CW-5584    | 164  | 1  | 74   | MALE   | G3        | Stage III | T3b | M0 | N1 |
| TCGA-BP-5191    | 967  | 0  | 79   | MALE   | G2        | Stage III | T3a | M0 | N0 |
| TCGA-B0-4688    | 101  | 1  | 46   | MALE   | G4        | Stage IV  | T4  | M1 | N0 |
| TCGA-CJ-5681    | 552  | 1  | 44   | FEMALE | G3        | Stage IV  | T3a | M1 | NX |
| TCGA-B0-4699    | 110  | 1  | 74   | MALE   | G4        | Stage IV  | T4  | M1 | N0 |
| TCGA-CJ-4908    | 1531 | 0  | 38   | MALE   | G2        | Stage I   | T1a | M0 | NX |
| TCGA-B0-4821    | 1230 | 1  | 68   | FEMALE | G3        | Stage III | T3b | M0 | N0 |
| TCGA-BP-4173    | 1893 | 0  | 47   | MALE   | G3        | Stage II  | T2  | M0 | N0 |
| TCGA-CW-5588    | 2017 | 0  | 78   | FEMALE | G2        | Stage I   | T1a | M0 | NX |
| TCGA-B2-4101    | 188  | 0  | 52   | MALE   | G3        | Stage II  | T2a | M0 | NX |
| TCGA-BP-4795    | 620  | 0  | 74   | FEMALE | G2        | Stage I   | T1a | M0 | N0 |
| TCGA-AK-3455    | 683  | 1  | 71   | FEMALE | G3        | Stage III | T3b | M0 | NX |
| TCGA-CJ-5675    | 2430 | 0  | 70   | MALE   | G3        | Stage II  | T2a | M0 | NX |
| TCGA-AK-3431    | 1853 | 0  | 62   | FEMALE | G3        | Stage II  | T2  | M0 | NX |
| TCGA-BP-5189    | 822  | 1  | 60   | MALE   | G4        | Stage I   | T1b | M0 | NX |
| TCGA-A3-3326    | 1137 | 0  | 47   | MALE   | G1        | Stage I   | T1a | M0 | NX |
| TCGA-CJ-5682    | 1883 | 0  | 60   | MALE   | G4        | Stage IV  | T3a | M1 | NX |
| TCGA-A3-A8OW    | 323  | 0  | 37   | MALE   | G2        | Stage III | T3a | MX | NX |
| TCGA-B0-5695    | 1420 | 0  | 61   | FEMALE | G2        | Stage I   | T1b | M0 | N0 |
| TCGA-AK-3465    | 369  | 0  | 71   | FEMALE | GX        | Stage I   | T1b | M0 | NX |
| TCGA-A3-A6NL    | 689  | 0  | 49   | FEMALE | G2        | Stage I   | T1b | MX | NX |

|                  |      |    |        |        |           |          |     |       |
|------------------|------|----|--------|--------|-----------|----------|-----|-------|
| TCGA-BP-47891489 | 0    | 48 | MALE   | G2     | Stage I   | T1a      | M0  | NX    |
| TCGA-B2-409851   | 1    | 72 | FEMALE | G2     | Stage I   | T1b      | M0  | NX    |
| TCGA-BP-51811495 | 0    | 58 | FEMALE | G2     | Stage I   | T1b      | M0  | NX    |
| TCGA-CJ-56831889 | 0    | 78 | MALE   | G3     | Stage I   | T1b      | M0  | NX    |
| TCGA-B4-58447    | 0    | 61 | FEMALE | G1     | Stage II  | T2       | M0  | NO    |
| TCGA-GK-A6C7     | 61   | 0  | 76     | FEMALE | unknow    | Stage I  | T1a | MX NX |
| TCGA-CW-5585     | 2609 | 0  | 51     | MALE   | G2        | Stage IV | T3b | M1 NO |
| TCGA-BP-48041459 | 0    | 59 | MALE   | G2     | Stage I   | T1b      | M0  | NX    |
| TCGA-BP-49592660 | 0    | 49 | MALE   | G3     | Stage I   | T1b      | M0  | NX    |
| TCGA-B8-4154255  | 0    | 73 | FEMALE | G2     | Stage I   | T1a      | M0  | NO    |
| TCGA-CJ-48761955 | 0    | 57 | MALE   | G3     | Stage II  | T2b      | M0  | NO    |
| TCGA-B0-57001082 | 0    | 77 | MALE   | G2     | Stage I   | T1a      | M0  | NO    |
| TCGA-B0-48371378 | 1    | 63 | MALE   | G3     | Stage I   | T1b      | M0  | NO    |
| TCGA-BP-5177293  | 0    | 46 | FEMALE | G3     | Stage I   | T1a      | M0  | NX    |
| TCGA-CZ-4865166  | 1    | 70 | FEMALE | G2     | Stage I   | T1a      | M0  | NX    |
| TCGA-B8-A54E909  | 0    | 62 | FEMALE | G3     | Stage I   | T1b      | MX  | NX    |
| TCGA-B0-4844313  | 1    | 60 | MALE   | G3     | Stage IV  | T3a      | M1  | NX    |
| TCGA-B0-56921487 | 0    | 66 | FEMALE | G3     | Stage III | T3b      | M0  | NO    |
| TCGA-B0-5088563  | 1    | 53 | MALE   | G3     | Stage I   | T1b      | M0  | NO    |
| TCGA-B0-57093117 | 0    | 62 | FEMALE | G3     | Stage III | T3a      | M0  | NX    |
| TCGA-BP-41583377 | 0    | 69 | MALE   | G2     | Stage I   | T1b      | M0  | NO    |
| TCGA-AK-34401745 | 0    | 58 | MALE   | G3     | Stage I   | T1a      | M0  | NX    |
| TCGA-CJ-48721435 | 0    | 51 | MALE   | G4     | Stage I   | T1b      | M0  | NO    |
| TCGA-B8-5545522  | 0    | 42 | MALE   | G2     | Stage I   | T1a      | M0  | NO    |
| TCGA-B4-5832155  | 0    | 65 | MALE   | G2     | Stage III | T3b      | M0  | NO    |
| TCGA-B2-3923362  | 0    | 59 | MALE   | G2     | Stage II  | T2       | M0  | NX    |
| TCGA-BP-47771731 | 0    | 46 | MALE   | G3     | Stage I   | T1a      | M0  | NX    |
| TCGA-BP-5194408  | 0    | 39 | MALE   | G2     | Stage I   | T1a      | M0  | NX    |
| TCGA-BP-4993177  | 0    | 58 | MALE   | G3     | Stage I   | T1a      | M0  | NX    |
| TCGA-A3-A8OX     | 0    | 0  | 65     | FEMALE | G3        | Stage I  | T1a | MX NX |
| TCGA-CJ-48921521 | 0    | 65 | FEMALE | G2     | Stage I   | T1b      | M0  | NO    |
| TCGA-B0-56982583 | 0    | 77 | MALE   | G3     | Stage I   | T1b      | M0  | NO    |
| TCGA-CZ-54651377 | 0    | 76 | FEMALE | G2     | Stage III | T3b      | M0  | NX    |
| TCGA-B0-5081362  | 1    | 79 | FEMALE | G2     | Stage III | T3b      | M0  | NO    |
| TCGA-B0-4694106  | 1    | 72 | MALE   | G4     | Stage III | T3b      | M0  | NX    |
| TCGA-BP-50011177 | 0    | 43 | FEMALE | G2     | Stage I   | T1b      | M0  | NX    |
| TCGA-B8-5553435  | 0    | 67 | FEMALE | G2     | Stage I   | T1b      | M0  | NO    |
| TCGA-CW-6088     | 3222 | 0  | 60     | MALE   | G2        | Stage I  | T1b | M0 NO |
| TCGA-B0-4838834  | 1    | 69 | FEMALE | G3     | Stage I   | T1b      | M0  | NO    |
| TCGA-B0-48111417 | 1    | 48 | MALE   | G3     | Stage III | T3a      | M0  | NO    |
| TCGA-BP-416613   | 0    | 69 | MALE   | G3     | Stage III | T3a      | M0  | NO    |
| TCGA-B8-461919   | 0    | 58 | MALE   | G2     | Stage I   | T1a      | M0  | NO    |
| TCGA-BP-49871124 | 0    | 41 | FEMALE | G2     | Stage I   | T1b      | M0  | NX    |
| TCGA-B8-5552392  | 0    | 41 | FEMALE | G2     | Stage I   | T1b      | M0  | NX    |

|                  |      |    |      |        |         |           |     |        |    |
|------------------|------|----|------|--------|---------|-----------|-----|--------|----|
| TCGA-A3-3365873  | 0    | 46 | MALE | G2     | Stage I | T1a       | M0  | NX     |    |
| TCGA-A3-33672270 | 0    | 72 | MALE | G3     | Stage I | T1b       | M0  | NO     |    |
| TCGA-CJ-4885     | 2125 | 0  | 64   | MALE   | G3      | Stage IV  | T3a | M1     | NX |
| TCGA-BP-51702412 | 0    | 55 | MALE | G2     | Stage I | T1a       | M0  | NX     |    |
| TCGA-CJ-6031     | 1906 | 0  | 54   | MALE   | G3      | Stage I   | T1b | M0     | NX |
| TCGA-CJ-4882     | 1883 | 0  | 57   | MALE   | G3      | Stage III | T3a | M0     | NX |
| TCGA-CJ-4881     | 2014 | 0  | 41   | MALE   | G3      | Stage III | T3a | M0     | NX |
| TCGA-CJ-4897     | 1808 | 0  | 79   | FEMALE | G3      | Stage III | T3a | M0     | NX |
| TCGA-BP-4781     | 2080 | 0  | 78   | MALE   | G3      | Stage I   | T1a | M0     | NX |
| TCGA-CJ-6032     | 2548 | 0  | 63   | FEMALE | G3      | Stage II  | T2  | M0     | NX |
| TCGA-DV-5576     | 727  | 1  | 55   | FEMALE | G2      | Stage I   | T1a | M0     | NX |
| TCGA-BP-4989     | 118  | 0  | 58   | MALE   | G3      | Stage III | T3a | M0     | NO |
| TCGA-BP-4797     | 1107 | 0  | 34   | MALE   | G3      | Stage III | T3b | M0     | NO |
| TCGA-B0-4810     | 478  | 1  | 47   | MALE   | G3      | Stage III | T3a | M0     | N1 |
| TCGA-BP-5199     | 1355 | 0  | 58   | MALE   | G4      | Stage II  | T2  | M0     | NO |
| TCGA-CJ-6030     | 2299 | 1  | 65   | MALE   | G3      | Stage I   | T1a | M0     | NO |
| TCGA-B8-5162     | 22   | 0  | 62   | MALE   | G2      | Stage II  | T2a | M0     | NX |
| TCGA-MW-A4EC     | 498  | 0  | 72   | FEMALE | G2      | Stage I   | T1a | MX     | NX |
| TCGA-B4-5836     | 141  | 0  | 61   | FEMALE | G2      | Stage I   | T1b | M0     | NO |
| TCGA-B0-4833     | 2386 | 1  | 82   | FEMALE | G2      | Stage I   | T1b | M0     | NO |
| TCGA-B0-4691     | 139  | 1  | 55   | MALE   | G3      | Stage IV  | T2  | M1     | NO |
| TCGA-BP-4343     | 1912 | 1  | 64   | MALE   | G3      | Stage III | T3a | M0     | NO |
| TCGA-B0-5119     | 59   | 0  | 61   | FEMALE | G2      | Stage I   | T1b | M0     | NO |
| TCGA-CJ-4903     | 1560 | 0  | 50   | MALE   | G3      | Stage I   | T1b | M0     | NX |
| TCGA-CZ-5457     | 1547 | 0  | 62   | MALE   | G4      | Stage III | T3a | M0     | NX |
| TCGA-BP-4967     | 205  | 0  | 76   | MALE   | G2      | Stage III | T3a | M0     | NO |
| TCGA-B8-4621     | 431  | 0  | 63   | MALE   | G3      | Stage I   | T1b | M0     | NO |
| TCGA-BP-5196     | 1018 | 0  | 53   | MALE   | G2      | Stage I   | T1a | M0     | NX |
| TCGA-CW-5581     | 2799 | 0  | 44   | MALE   | G3      | Stage I   | T1b | M0     | NX |
| TCGA-B0-4823     | 454  | 1  | 88   | MALE   | G2      | Stage I   | T1a | M0     | NO |
| TCGA-CZ-5982     | 2042 | 0  | 59   | FEMALE | G2      | Stage I   | T1a | M0     | NX |
| TCGA-A3-3313     | 735  | 1  | 59   | MALE   | G3      | Stage I   | T1b | M0     | NO |
| TCGA-CZ-5986     | 373  | 0  | 61   | MALE   | G3      | Stage I   | T1  | M0     | NO |
| TCGA-CZ-5988     | 693  | 0  | 38   | MALE   | G2      | Stage I   | T1b | M0     | NO |
| TCGA-BP-4327     | 109  | 1  | 75   | FEMALE | G2      | Stage II  | T2  | M0     | NO |
| TCGA-CJ-4891     | 819  | 1  | 57   | FEMALE | G4      | Stage III | T3c | M0     | NO |
| TCGA-B8-4146     | 511  | 0  | 41   | FEMALE | G2      | Stage I   | T1b | M0     | NX |
| TCGA-BP-4975     | 1433 | 0  | 40   | MALE   | G3      | Stage I   | T1b | M0     | NX |
| TCGA-A3-3329     | 1624 | 0  | 75   | MALE   | G2      | Stage I   | T1b | M0     | NO |
| TCGA-B0-5102     | 2764 | 1  | 74   | FEMALE | G3      | Stage I   | T1  | M0     | NX |
| TCGA-A3-3374     | 1314 | 0  | 51   | FEMALE | G2      | Stage I   | T1b | M0     | NO |
| TCGA-B8-A7U6     | 495  | 0  | 54   | FEMALE | G3      | Stage I   | T1a | unknow | NX |
| TCGA-B0-5113     | 359  | 0  | 69   | FEMALE | G2      | Stage III | T3a | M0     | NO |
| TCGA-BP-5195     | 749  | 0  | 75   | MALE   | G2      | Stage I   | T1a | M0     | NX |

|                  |      |    |        |      |           |           |     |       |
|------------------|------|----|--------|------|-----------|-----------|-----|-------|
| TCGA-BP-47602361 | 0    | 69 | MALE   | G2   | Stage I   | T1a       | M0  | NX    |
| TCGA-B8-5549194  | 0    | 53 | MALE   | G3   | Stage I   | T1b       | M0  | N0    |
| TCGA-BP-51821165 | 0    | 56 | MALE   | G3   | Stage I   | T1a       | M0  | N0    |
| TCGA-BP-4771162  | 1    | 62 | MALE   | G4   | Stage IV  | T3a       | M1  | N0    |
| TCGA-BP-5175932  | 0    | 60 | MALE   | G3   | Stage I   | T1a       | M0  | NX    |
| TCGA-CJ-46361924 | 0    | 51 | MALE   | G3   | Stage III | T3a       | M0  | N0    |
| TCGA-A3-33471610 | 1    | 76 | FEMALE | G2   | Stage III | T1b       | M0  | N1    |
| TCGA-BP-4988828  | 1    | 72 | MALE   | G2   | Stage I   | T1a       | M0  | N0    |
| TCGA-CJ-56842231 | 0    | 61 | MALE   | G2   | Stage III | T3a       | M0  | NX    |
| TCGA-B0-48342090 | 1    | 49 | MALE   | G3   | Stage I   | T1a       | M0  | N0    |
| TCGA-B0-48171019 | 1    | 81 | MALE   | G3   | Stage III | T3c       | M0  | N0    |
| TCGA-CJ-46341820 | 0    | 60 | FEMALE | G2   | Stage I   | T1b       | M0  | NX    |
| TCGA-BP-49731384 | 0    | 47 | MALE   | G3   | Stage III | T3a       | M0  | NX    |
| TCGA-B8-A54D     | 830  | 0  | 69     | MALE | G2        | Stage III | T3a | MX NX |
| TCGA-B8-A54J     | 528  | 0  | 60     | MALE | G2        | Stage II  | T2a | MX NX |
| TCGA-A3-33311257 | 0    | 86 | FEMALE | G2   | Stage I   | T1        | M0  | N0    |
| TCGA-BP-4169701  | 1    | 76 | FEMALE | G2   | Stage II  | T2        | M0  | N0    |
| TCGA-CW-5590     | 1075 | 1  | 51     | MALE | G3        | Stage IV  | T3a | M1 NX |
| TCGA-BP-517362   | 1    | 75 | MALE   | G2   | Stage I   | T1a       | M0  | NX    |
| TCGA-CW-6097     | 571  | 1  | 32     | MALE | G4        | Stage III | T3a | M0 NX |
| TCGA-B0-56933076 | 0    | 47 | FEMALE | G2   | Stage I   | T1b       | M0  | NX    |
| TCGA-A3-33702274 | 0    | 48 | FEMALE | G2   | Stage I   | T1b       | M0  | N0    |
| TCGA-BP-41741879 | 0    | 49 | MALE   | G3   | Stage II  | T2        | M0  | N0    |
| TCGA-CZ-5454722  | 1    | 63 | MALE   | G2   | Stage IV  | T2        | M1  | N0    |
| TCGA-AK-34362044 | 0    | 40 | MALE   | G2   | Stage IV  | T2        | M1  | N0    |
| TCGA-BP-5198603  | 0    | 72 | MALE   | G3   | Stage III | T3b       | M0  | N0    |
| TCGA-CJ-48731776 | 0    | 85 | FEMALE | G3   | Stage III | T3a       | M0  | N0    |
| TCGA-BP-5186693  | 0    | 50 | FEMALE | G2   | Stage I   | T1a       | M0  | N0    |
| TCGA-BP-4998932  | 0    | 49 | MALE   | G3   | Stage I   | T1a       | M0  | NX    |
| TCGA-CJ-49021520 | 0    | 61 | MALE   | G3   | Stage III | T3a       | M0  | NX    |
| TCGA-CW-5589     | 2378 | 0  | 52     | MALE | G2        | Stage I   | T1a | M0 NX |
| TCGA-CZ-5466685  | 0    | 67 | MALE   | G2   | Stage III | T3a       | M0  | NX    |
| TCGA-BP-50081071 | 0    | 46 | MALE   | G2   | Stage I   | T1a       | M0  | NX    |
| TCGA-CJ-48742283 | 0    | 73 | FEMALE | G3   | Stage I   | T1b       | M0  | N0    |
| TCGA-A3-A6NN     | 3    | 0  | 78     | MALE | G2        | Stage I   | T1a | MX NX |
| TCGA-AK-3461853  | 0    | 72 | MALE   | G2   | Stage I   | T1a       | M0  | NX    |
| TCGA-CJ-56862038 | 0    | 59 | FEMALE | G3   | Stage I   | T1b       | M0  | NX    |
| TCGA-B0-4847793  | 1    | 60 | MALE   | G3   | Stage IV  | T3a       | M1  | NX    |
| TCGA-A3-33221478 | 0    | 51 | MALE   | G2   | Stage I   | T1a       | M0  | NX    |
| TCGA-BP-5187406  | 0    | 54 | MALE   | G2   | Stage I   | T1a       | M0  | NX    |
| TCGA-BP-47631270 | 1    | 79 | FEMALE | G2   | Stage I   | T1a       | M0  | NX    |
| TCGA-B8-4622181  | 0    | 57 | MALE   | G3   | Stage IV  | T3a       | M1  | N0    |
| TCGA-BP-47841854 | 0    | 67 | FEMALE | G2   | Stage I   | T1a       | M0  | NX    |
| TCGA-CJ-49011450 | 0    | 47 | MALE   | G3   | Stage III | T3b       | M0  | NX    |

|                  |      |    |        |        |           |          |     |       |
|------------------|------|----|--------|--------|-----------|----------|-----|-------|
| TCGA-BP-49911413 | 0    | 54 | MALE   | G2     | Stage I   | T1a      | M0  | NX    |
| TCGA-CW-6096     | 2701 | 0  | 44     | FEMALE | G2        | Stage I  | T1a | M0 NX |
| TCGA-BP-49991266 | 0    | 56 | MALE   | G2     | Stage I   | T1a      | M0  | NX    |
| TCGA-CJ-46421628 | 0    | 47 | MALE   | G2     | Stage II  | T2       | M0  | NX    |
| TCGA-A3-A6NI1018 | 0    | 47 | MALE   | G3     | Stage I   | T1a      | MX  | NX    |
| TCGA-CZ-48631691 | 0    | 51 | FEMALE | G3     | Stage III | T3b      | M0  | NO    |
| TCGA-B8-51658    | 0    | 43 | MALE   | G2     | Stage I   | T1a      | M0  | NO    |
| TCGA-B0-48221111 | 1    | 78 | MALE   | G4     | Stage II  | T2       | M0  | NX    |
| TCGA-BP-43411589 | 1    | 67 | MALE   | G2     | Stage III | T3a      | M0  | NX    |
| TCGA-B2-5636265  | 0    | 79 | MALE   | G2     | Stage I   | T1a      | M0  | NX    |
| TCGA-DV-5565     | 1329 | 0  | 59     | MALE   | G2        | Stage I  | T1a | M0 NX |
| TCGA-B2-4102202  | 0    | 61 | MALE   | G2     | Stage I   | T1b      | M0  | NX    |
| TCGA-BP-49681746 | 0    | 40 | MALE   | G3     | Stage I   | T1b      | M0  | NO    |
| TCGA-CZ-48581943 | 0    | 39 | MALE   | G4     | Stage II  | T2       | M0  | NX    |
| TCGA-BP-4787480  | 1    | 59 | FEMALE | G4     | Stage IV  | T3a      | M1  | NO    |
| TCGA-CZ-48591787 | 0    | 59 | FEMALE | G2     | Stage I   | T1       | M0  | NO    |
| TCGA-A3-33572688 | 0    | 62 | MALE   | G3     | Stage II  | T2       | M0  | NO    |
| TCGA-CJ-48951200 | 1    | 62 | MALE   | G4     | Stage IV  | T3a      | M1  | NX    |
| TCGA-BP-50091092 | 1    | 52 | MALE   | G3     | Stage I   | T1b      | M0  | NX    |
| TCGA-B0-56961727 | 0    | 69 | MALE   | G4     | Stage III | T3a      | M0  | NO    |
| TCGA-B0-57072828 | 0    | 39 | FEMALE | G3     | Stage I   | T1a      | M0  | NO    |
| TCGA-CZ-5469946  | 1    | 41 | MALE   | G2     | Stage II  | T2       | M0  | NO    |
| TCGA-BP-4334645  | 1    | 56 | MALE   | G3     | Stage III | T3a      | M0  | NO    |
| TCGA-CW-6090     | 2552 | 0  | 68     | MALE   | G3        | Stage I  | T1b | M0 NX |
| TCGA-BP-47901111 | 1    | 76 | MALE   | G2     | Stage I   | T1a      | M0  | NX    |
| TCGA-B8-5546505  | 0    | 38 | FEMALE | G2     | Stage I   | T1b      | M0  | NO    |
| TCGA-B0-5095245  | 1    | 81 | MALE   | G3     | Stage III | T3a      | M0  | NO    |
| TCGA-B0-470665   | 1    | 61 | MALE   | G4     | Stage III | T3a      | M0  | NX    |
| TCGA-BP-4353375  | 1    | 61 | MALE   | G2     | Stage I   | T1       | M0  | NO    |
| TCGA-CZ-4861446  | 1    | 63 | MALE   | G2     | Stage II  | T2       | M0  | NX    |
| TCGA-B0-469377   | 1    | 72 | FEMALE | G4     | Stage III | T3a      | M0  | NO    |
| TCGA-G6-A8L6313  | 1    | 55 | MALE   | G3     | Stage IV  | T2a      | MX  | NX    |
| TCGA-CW-5583     | 2489 | 0  | 51     | FEMALE | G2        | Stage I  | T1a | M0 NX |
| TCGA-MM-A84U     | 700  | 0  | 58     | FEMALE | G2        | Stage I  | T1a | MX NX |
| TCGA-AK-34531397 | 0    | 58 | FEMALE | G2     | Stage II  | T2       | M0  | NX    |
| TCGA-B0-50981584 | 1    | 53 | FEMALE | G3     | Stage I   | T1       | M0  | NX    |
| TCGA-CJ-4644336  | 1    | 48 | FEMALE | G3     | Stage IV  | T3a      | M1  | NO    |
| TCGA-G6-A5PC     | 242  | 1  | 54     | FEMALE | G4        | Stage IV | T1b | M1 NO |
| TCGA-CZ-54521556 | 0    | 69 | MALE   | G2     | Stage II  | T2       | M0  | NO    |
| TCGA-DV-A4W0     | 2008 | 0  | 55     | MALE   | G3        | Stage I  | T1b | MX NX |
| TCGA-CZ-485618   | 0    | 62 | FEMALE | G2     | Stage I   | T1b      | M0  | NO    |
| TCGA-CJ-48692554 | 0    | 49 | MALE   | G2     | Stage III | T2       | M0  | N1    |
| TCGA-BP-5201951  | 0    | 63 | MALE   | G4     | Stage IV  | T3b      | M1  | NO    |
| TCGA-AK-34332192 | 0    | 48 | FEMALE | GX     | Stage II  | T2       | M0  | NO    |



|                  |      |    |        |        |           |          |     |       |
|------------------|------|----|--------|--------|-----------|----------|-----|-------|
| TCGA-B8-4620226  | 0    | 70 | FEMALE | G2     | Stage III | T3a      | M0  | N0    |
| TCGA-A3-33731621 | 0    | 54 | FEMALE | G3     | Stage I   | T1b      | M0  | N0    |
| TCGA-CJ-4893750  | 0    | 76 | FEMALE | G3     | Stage I   | T1b      | M0  | NX    |
| TCGA-BP-43461493 | 1    | 57 | MALE   | G3     | Stage III | T3b      | M0  | N0    |
| TCGA-EU-5905119  | 0    | 67 | FEMALE | G3     | Stage I   | T1       | M0  | NX    |
| TCGA-A3-33621559 | 0    | 60 | FEMALE | G2     | Stage I   | T1a      | M0  | N0    |
| TCGA-CJ-5680768  | 1    | 65 | FEMALE | G4     | Stage IV  | T3a      | M1  | NX    |
| TCGA-B8-516423   | 0    | 65 | MALE   | G3     | Stage III | T3a      | M0  | N0    |
| TCGA-B4-583438   | 0    | 59 | MALE   | G1     | Stage I   | T1       | M0  | N0    |
| TCGA-B8-51634    | 0    | 63 | FEMALE | G3     | Stage III | T3a      | M0  | N0    |
| TCGA-CJ-48701498 | 0    | 58 | FEMALE | G2     | Stage III | T3a      | M0  | NX    |
| TCGA-B0-50831045 | 1    | 63 | MALE   | G3     | Stage I   | T1a      | M0  | N0    |
| TCGA-BP-4340562  | 1    | 70 | FEMALE | G2     | Stage I   | T1b      | M0  | N0    |
| TCGA-CZ-59851629 | 0    | 58 | MALE   | G2     | Stage II  | T2       | M0  | N0    |
| TCGA-BP-41632839 | 0    | 60 | FEMALE | G3     | Stage III | T3a      | M0  | N0    |
| TCGA-B2-A4SR507  | 0    | 61 | MALE   | unknow | Stage II  | T2a      | M0  | NX    |
| TCGA-BP-4986785  | 0    | 75 | MALE   | G3     | Stage I   | T1a      | M0  | N0    |
| TCGA-BP-49602172 | 0    | 46 | MALE   | G3     | Stage II  | T2       | M0  | N0    |
| TCGA-A3-33111191 | 1    | 57 | MALE   | G2     | Stage I   | T1       | M0  | NX    |
| TCGA-B0-4696866  | 1    | 58 | MALE   | G3     | Stage III | T3a      | M0  | N0    |
| TCGA-CZ-546773   | 1    | 86 | FEMALE | G4     | Stage III | T3a      | M0  | N0    |
| TCGA-B0-5107927  | 1    | 65 | FEMALE | G4     | Stage IV  | T2       | M1  | N0    |
| TCGA-B0-5092459  | 1    | 53 | FEMALE | G3     | Stage IV  | T1a      | M1  | N0    |
| TCGA-CJ-48991528 | 0    | 42 | MALE   | G2     | Stage I   | T1b      | M0  | NX    |
| TCGA-BP-43441666 | 0    | 75 | FEMALE | G2     | Stage I   | T1a      | M0  | NX    |
| TCGA-B0-48461200 | 1    | 52 | MALE   | G2     | Stage IV  | T3a      | M1  | N0    |
| TCGA-DV-A4VX     | 1626 | 1  | 59     | MALE   | G4        | Stage IV | T3b | MX N0 |
| TCGA-B2-4099374  | 0    | 83 | MALE   | G3     | Stage I   | T1a      | M0  | NX    |
| TCGA-G6-A8L81091 | 1    | 62 | FEMALE | G3     | Stage I   | T1b      | MX  | NX    |
| TCGA-AK-3426885  | 1    | 37 | MALE   | G3     | Stage III | T3a      | M0  | N1    |
| TCGA-B0-56992741 | 0    | 53 | MALE   | G2     | Stage I   | T1       | M0  | N0    |
| TCGA-AK-34253343 | 0    | 68 | MALE   | G2     | Stage I   | T1       | M0  | N0    |
| TCGA-BP-4770329  | 1    | 73 | FEMALE | G4     | Stage IV  | T4       | M0  | N0    |
| TCGA-B0-57062414 | 0    | 45 | MALE   | G2     | Stage II  | T2       | M0  | N0    |
| TCGA-B0-4819183  | 1    | 60 | FEMALE | G4     | Stage IV  | T3b      | M1  | NX    |
| TCGA-B0-5402449  | 0    | 64 | MALE   | G4     | Stage IV  | T4       | M0  | NX    |
| TCGA-A3-33491385 | 0    | 34 | FEMALE | G2     | Stage I   | T1b      | M0  | N0    |
| TCGA-B0-58122963 | 0    | 53 | MALE   | G3     | Stage I   | T1b      | M0  | NX    |
| TCGA-B0-48421724 | 1    | 73 | FEMALE | G4     | Stage III | T3a      | M0  | N0    |
| TCGA-BP-48011124 | 0    | 57 | MALE   | G2     | Stage I   | T1a      | M0  | NX    |
| TCGA-A3-3378630  | 0    | 60 | MALE   | G3     | Stage I   | T1       | M0  | N0    |
| TCGA-DV-5575     | 1006 | 0  | 52     | FEMALE | G2        | Stage I  | T1a | M0 NX |
| TCGA-B2-5641324  | 0    | 79 | MALE   | G3     | Stage I   | T1a      | M0  | N0    |
| TCGA-B0-484969   | 1    | 51 | MALE   | G3     | Stage III | T3a      | M0  | NX    |

|                  |      |    |        |        |           |           |     |    |    |
|------------------|------|----|--------|--------|-----------|-----------|-----|----|----|
| TCGA-B8-5158293  | 0    | 56 | MALE   | G4     | Stage III | T3a       | M0  | N1 |    |
| TCGA-BP-50071140 |      | 0  | 45     | MALE   | G2        | Stage II  | T2  | M0 | NO |
| TCGA-B0-57101459 |      | 0  | 57     | MALE   | G2        | Stage I   | T1b | M0 | NO |
| TCGA-BP-51761590 |      | 1  | 78     | FEMALE | G2        | Stage I   | T1a | M0 | NX |
| TCGA-BP-4782354  | 0    | 55 | FEMALE | G2     | Stage I   | T1a       | M0  | NX |    |
| TCGA-EU-5907127  | 0    | 81 | MALE   | G3     | Stage III | T3a       | M0  | NX |    |
| TCGA-B8-A54I     | 150  | 0  | 48     | MALE   | G3        | Stage I   | T1b | MX | NX |
| TCGA-B0-47121337 |      | 1  | 76     | MALE   | G3        | Stage IV  | T3a | M1 | NX |
| TCGA-BP-49641862 |      | 0  | 54     | FEMALE | G2        | Stage I   | T1a | M0 | NO |
| TCGA-BP-4351970  | 0    | 51 | FEMALE | G2     | Stage III | T3a       | M0  | NO |    |
| TCGA-BP-4164992  | 1    | 51 | FEMALE | G2     | Stage III | T3a       | M0  | NX |    |
| TCGA-BP-41702343 |      | 1  | 72     | FEMALE | G2        | Stage I   | T1b | M0 | NO |
| TCGA-DV-5567     | 910  | 0  | 40     | FEMALE | G2        | Stage I   | T1a | M0 | NX |
| TCGA-CZ-59891599 |      | 0  | 60     | MALE   | G2        | Stage II  | T2  | M0 | NO |
| TCGA-DV-A4VZ     | 365  | 0  | 53     | MALE   | G2        | Stage I   | T1a | MX | NX |
| TCGA-CJ-491893   | 1    | 64 | MALE   | G4     | Stage IV  | T3a       | M1  | NO |    |
| TCGA-CZ-54561558 |      | 0  | 57     | MALE   | G3        | Stage II  | T2  | M0 | NO |
| TCGA-BP-43312454 |      | 1  | 52     | MALE   | G2        | Stage I   | T1a | M0 | NO |
| TCGA-B0-57112931 |      | 0  | 50     | MALE   | G3        | Stage III | T3b | M0 | NX |
| TCGA-EU-5904551  | 0    | 47 | FEMALE | G1     | Stage I   | T1        | M0  | NX |    |
| TCGA-CJ-48902085 |      | 0  | 72     | MALE   | G4        | Stage IV  | T3a | M1 | NO |
| TCGA-B0-469842   | 1    | 75 | MALE   | G4     | Stage IV  | T4        | M0  | NX |    |
| TCGA-CZ-5987445  | 1    | 60 | MALE   | G2     | Stage IV  | T3b       | M1  | NX |    |
| TCGA-BP-43301888 |      | 0  | 60     | FEMALE | G2        | Stage III | T3a | M0 | NO |
| TCGA-CJ-4638431  | 1    | 46 | FEMALE | G4     | Stage IV  | T3a       | M1  | N1 |    |
| TCGA-A3-3380567  | 0    | 54 | MALE   | G2     | Stage I   | T1        | M0  | NO |    |
| TCGA-G6-A8L72133 |      | 0  | 81     | FEMALE | G3        | Stage I   | T1b | MX | NO |
| TCGA-BP-49711487 |      | 0  | 40     | MALE   | G3        | Stage III | T3a | M0 | NO |
| TCGA-BP-47991133 |      | 1  | 70     | MALE   | G3        | Stage III | T3b | M0 | NO |
| TCGA-CZ-48541404 |      | 1  | 68     | MALE   | G2        | Stage I   | T1b | M0 | NO |
| TCGA-A3-3387617  | 0    | 49 | MALE   | G2     | Stage I   | T1a       | M0  | NO |    |
| TCGA-B0-51040    | 1    | 90 | FEMALE | G2     | Stage I   | T1        | M0  | NO |    |
| TCGA-B0-57053668 |      | 0  | 65     | FEMALE | G2        | Stage I   | T1  | M0 | NO |
| TCGA-A3-A8CQ     | 3    | 0  | 59     | FEMALE | G2        | Stage I   | T1a | MX | NX |
| TCGA-DV-5566     | 1398 | 0  | 67     | FEMALE | G2        | Stage I   | T1a | M0 | NX |
| TCGA-BP-49761632 |      | 0  | 77     | MALE   | G3        | Stage I   | T1a | M0 | NX |
| TCGA-A3-33581307 |      | 0  | 57     | FEMALE | G2        | Stage I   | T1a | M0 | NO |
| TCGA-B0-5694480  | 1    | 71 | MALE   | G3     | Stage III | T3a       | M0  | NO |    |
| TCGA-CJ-56890    | 1    | 90 | MALE   | G4     | Stage I   | T1b       | M0  | NX |    |
| TCGA-BP-41672718 |      | 0  | 59     | MALE   | G2        | Stage III | T3a | M0 | NX |
| TCGA-BP-49691794 |      | 0  | 63     | FEMALE | G2        | Stage I   | T1a | M0 | NX |
| TCGA-B8-A54H     | 256  | 0  | 69     | FEMALE | G3        | Stage II  | T2a | MX | NO |
| TCGA-B8-4143709  | 1    | 66 | FEMALE | G3     | Stage IV  | T3a       | M1  | NO |    |
| TCGA-BP-4776411  | 0    | 52 | MALE   | G2     | Stage I   | T1a       | M0  | NX |    |

|                  |     |    |        |      |           |          |     |    |    |
|------------------|-----|----|--------|------|-----------|----------|-----|----|----|
| TCGA-BP-51831291 | 0   | 57 | MALE   | G3   | Stage III | T3a      | M0  | NX |    |
| TCGA-A3-33171491 | 0   | 67 | MALE   | G2   | Stage II  | T2       | M0  | NO |    |
| TCGA-CJ-6033224  | 1   | 54 | FEMALE | G4   | Stage IV  | T3a      | M1  | NO |    |
| TCGA-CW-6087     | 41  | 1  | 61     | MALE | G4        | Stage IV | T3a | M1 | N1 |
| TCGA-CZ-4853774  | 0   | 82 | MALE   | G2   | Stage I   | T1a      | M0  | NX |    |
| TCGA-A3-A8OV     | 340 | 0  | 75     | MALE | G2        | Stage I  | T1a | MX | NX |
| TCGA-BP-47661462 | 0   | 43 | FEMALE | G3   | Stage I   | T1a      | M0  | NX |    |
| TCGA-BP-43471367 | 0   | 74 | MALE   | G2   | Stage III | T3b      | M0  | NX |    |
| TCGA-EU-5906206  | 0   | 55 | MALE   | G2   | Stage I   | T1b      | M0  | NX |    |
| TCGA-B0-469043   | 1   | 65 | MALE   | G3   | Stage IV  | T4       | M1  | NO |    |
| TCGA-CJ-4923572  | 1   | 63 | FEMALE | G4   | Stage IV  | T3a      | M1  | NX |    |
| TCGA-B0-4843320  | 1   | 57 | MALE   | G3   | Stage III | T3a      | M0  | NO |    |
| TCGA-AK-3460951  | 0   | 58 | MALE   | G2   | Stage I   | T1a      | M0  | NX |    |
| TCGA-CJ-49131173 | 1   | 45 | FEMALE | G4   | Stage III | T3a      | M0  | NX |    |
| TCGA-CJ-56762575 | 0   | 47 | MALE   | G3   | Stage III | T3b      | M0  | NX |    |
| TCGA-CZ-48641315 | 1   | 86 | MALE   | G3   | Stage II  | T2       | M0  | NO |    |
| TCGA-CJ-4920139  | 1   | 64 | FEMALE | G2   | Stage I   | T1b      | M0  | NX |    |
| TCGA-B0-5121554  | 0   | 56 | MALE   | G2   | Stage I   | T1b      | M0  | NO |    |
| TCGA-DV-5568     | 370 | 0  | 26     | MALE | G2        | Stage I  | T1a | M0 | NX |
| TCGA-B0-56902408 | 0   | 53 | FEMALE | G1   | Stage I   | T1b      | M0  | NX |    |
| TCGA-B0-5094333  | 1   | 62 | MALE   | G2   | Stage IV  | T3b      | M1  | NO |    |
| TCGA-BP-5169193  | 0   | 70 | MALE   | G4   | Stage I   | T1b      | M0  | NO |    |
| TCGA-BP-49941308 | 0   | 54 | MALE   | G3   | Stage I   | T1a      | M0  | NX |    |
| TCGA-AK-34292017 | 0   | 54 | FEMALE | G2   | Stage II  | T2       | M0  | NO |    |
| TCGA-CZ-48571432 | 1   | 56 | MALE   | G3   | Stage IV  | T3a      | M1  | NO |    |
| TCGA-BP-4798334  | 1   | 74 | MALE   | G4   | unknow    | T3b      | M1  | NO |    |
| TCGA-CZ-5461330  | 1   | 52 | MALE   | G4   | Stage IV  | T1b      | M1  | NX |    |
| TCGA-BP-4768400  | 0   | 72 | FEMALE | G2   | Stage I   | T1a      | M0  | NO |    |
| TCGA-B0-48361238 | 1   | 61 | MALE   | G3   | Stage IV  | T3b      | M1  | NX |    |
| TCGA-MM-A563     | 591 | 0  | 41     | MALE | G2        | unknow   | T3  | MX | NX |
| TCGA-BP-43252964 | 0   | 64 | FEMALE | G2   | Stage I   | T1b      | M0  | NO |    |
| TCGA-BP-520229   | 0   | 75 | MALE   | G2   | Stage III | T3a      | M0  | NX |    |
| TCGA-BP-43321133 | 0   | 36 | MALE   | G2   | Stage III | T3a      | M0  | NO |    |
| TCGA-B0-5399652  | 0   | 46 | MALE   | G2   | Stage I   | T1b      | M0  | NO |    |
| TCGA-B0-51061598 | 1   | 64 | MALE   | G2   | Stage I   | T1a      | M0  | NO |    |
| TCGA-B0-48391639 | 1   | 80 | FEMALE | G2   | Stage I   | T1b      | M0  | NO |    |
| TCGA-BP-47592372 | 0   | 50 | MALE   | G2   | Stage I   | T1a      | M0  | NX |    |
| TCGA-A3-3382574  | 0   | 69 | MALE   | G3   | Stage I   | T1b      | M0  | NX |    |
| TCGA-A3-33251170 | 1   | 52 | MALE   | G2   | Stage I   | T1a      | M0  | NX |    |
| TCGA-B2-5635315  | 0   | 74 | MALE   | G2   | Stage I   | T1a      | M0  | NX |    |
| TCGA-CZ-54601430 | 0   | 55 | MALE   | G2   | Stage IV  | T3b      | M1  | NX |    |
| TCGA-B0-4818510  | 1   | 68 | FEMALE | G3   | Stage II  | T2       | M0  | NX |    |
| TCGA-BP-51802263 | 0   | 53 | MALE   | G2   | Stage I   | T1a      | M0  | NX |    |
| TCGA-CZ-59841491 | 0   | 51 | MALE   | G3   | Stage I   | T1b      | M0  | NO |    |

|                  |      |    |        |        |           |          |     |    |    |
|------------------|------|----|--------|--------|-----------|----------|-----|----|----|
| TCGA-AK-34441471 | 0    | 80 | FEMALE | G2     | Stage I   | T1b      | M0  | NX |    |
| TCGA-CJ-49051496 | 0    | 62 | FEMALE | G2     | Stage I   | T1a      | M0  | NX |    |
| TCGA-BP-43451516 | 0    | 62 | MALE   | G3     | Stage III | T3b      | M0  | NO |    |
| TCGA-BP-4335475  | 1    | 65 | FEMALE | G3     | Stage IV  | T3a      | M1  | NO |    |
| TCGA-B0-4707600  | 1    | 63 | MALE   | G4     | Stage III | T3a      | M0  | NX |    |
| TCGA-A3-3346137  | 1    | 68 | MALE   | G3     | Stage I   | T1b      | M0  | NX |    |
| TCGA-B0-47001980 | 1    | 60 | MALE   | G4     | Stage IV  | T4       | M1  | NX |    |
| TCGA-AK-34471217 | 0    | 83 | MALE   | G2     | Stage II  | T2       | M0  | NX |    |
| TCGA-BP-43372    | 1    | 76 | FEMALE | G4     | Stage III | T3b      | M0  | NO |    |
| TCGA-A3-3372735  | 0    | 64 | MALE   | G2     | Stage III | T3       | M0  | NX |    |
| TCGA-B0-51101092 | 0    | 71 | FEMALE | G2     | Stage I   | T1a      | M0  | NO |    |
| TCGA-B4-584311   | 0    | 45 | MALE   | G2     | Stage I   | T1       | M0  | NO |    |
| TCGA-B0-48451986 | 1    | 70 | MALE   | G2     | Stage IV  | T3a      | M1  | NX |    |
| TCGA-BP-4970433  | 0    | 44 | MALE   | G3     | Stage III | T1a      | M0  | N1 |    |
| TCGA-A3-A8OU     | 0    | 0  | 74     | FEMALE | G1        | Stage I  | T1a | MX | NX |
| TCGA-A3-3352561  | 1    | 74 | MALE   | G3     | Stage III | T3a      | M0  | NO |    |
| TCGA-A3-3383861  | 0    | 52 | MALE   | G2     | Stage I   | T1       | M0  | NX |    |
| TCGA-BP-41761955 | 0    | 64 | MALE   | G2     | Stage I   | T1b      | M0  | NX |    |
| TCGA-CJ-56711943 | 0    | 51 | MALE   | G3     | Stage I   | T1a      | M0  | NX |    |
| TCGA-B0-4828307  | 1    | 79 | MALE   | G3     | Stage IV  | T2       | M1  | NX |    |
| TCGA-CJ-56721972 | 1    | 84 | MALE   | G3     | Stage I   | T1a      | M0  | NX |    |
| TCGA-CJ-46372227 | 1    | 52 | FEMALE | G4     | Stage IV  | T2b      | M1  | NX |    |
| TCGA-BP-49721502 | 0    | 43 | FEMALE | G3     | Stage III | T3a      | M0  | NX |    |
| TCGA-BP-4807211  | 0    | 42 | MALE   | G3     | Stage I   | T1a      | M0  | NX |    |
| TCGA-AK-34282223 | 0    | 62 | MALE   | G2     | Stage III | T3b      | M0  | NO |    |
| TCGA-B0-5099485  | 1    | 88 | FEMALE | G3     | Stage III | T3b      | M0  | NX |    |
| TCGA-B0-56971835 | 0    | 50 | MALE   | G2     | Stage I   | T1a      | M0  | NO |    |
| TCGA-CJ-49041792 | 0    | 60 | FEMALE | G3     | Stage IV  | T3a      | M1  | NO |    |
| TCGA-CJ-46401998 | 0    | 49 | MALE   | G4     | Stage III | T3a      | M0  | NO |    |
| TCGA-BP-4985952  | 1    | 72 | MALE   | G4     | Stage III | T3a      | M0  | NO |    |
| TCGA-B8-555115   | 0    | 65 | FEMALE | G3     | Stage I   | T1b      | M0  | NO |    |
| TCGA-CJ-46351416 | 0    | 48 | MALE   | G3     | Stage I   | T1b      | M0  | NX |    |
| TCGA-CJ-4894841  | 1    | 58 | MALE   | G3     | Stage III | T3a      | M0  | NO |    |
| TCGA-B0-471096   | 0    | 75 | FEMALE | G3     | Stage III | T3a      | M0  | NO |    |
| TCGA-BP-51742257 | 0    | 45 | FEMALE | G2     | Stage I   | T1a      | M0  | NX |    |
| TCGA-B0-4841204  | 1    | 63 | MALE   | G3     | Stage IV  | T2       | M1  | NX |    |
| TCGA-CJ-4887932  | 1    | 48 | MALE   | G3     | Stage IV  | T3a      | M1  | NX |    |
| TCGA-CW-6093     | 3146 | 0  | 73     | MALE   | G1        | Stage I  | T1a | M0 | NX |
| TCGA-CJ-48861952 | 0    | 42 | FEMALE | G3     | Stage I   | T1a      | M0  | NX |    |
| TCGA-AK-3454874  | 0    | 84 | MALE   | G3     | Stage I   | T1b      | M0  | NX |    |
| TCGA-AK-34451280 | 0    | 69 | MALE   | G3     | Stage III | T3a      | M0  | NX |    |
| TCGA-A3-33361043 | 0    | 75 | FEMALE | G4     | Stage I   | T1       | M0  | NX |    |
| TCGA-A3-3363319  | 0    | 50 | MALE   | G2     | Stage II  | T2       | M0  | NO |    |
| TCGA-CW-5591     | 2271 | 0  | 56     | MALE   | G2        | Stage IV | T3a | M1 | NO |

|                  |   |    |        |    |           |     |    |    |
|------------------|---|----|--------|----|-----------|-----|----|----|
| TCGA-B0-4848883  | 1 | 54 | MALE   | G3 | Stage III | T3b | M0 | NX |
| TCGA-BP-49831413 | 0 | 67 | FEMALE | G4 | Stage III | T3a | M0 | NX |
| TCGA-CJ-4868646  | 1 | 42 | MALE   | G3 | Stage IV  | T3a | M1 | N0 |
| TCGA-BP-5006840  | 0 | 61 | MALE   | G2 | Stage I   | T1a | M0 | N0 |
| TCGA-CJ-60271855 | 0 | 77 | MALE   | G4 | Stage I   | T1a | M0 | NX |
| TCGA-A3-A6NJ468  | 0 | 57 | FEMALE | G1 | Stage I   | T1a | MX | NX |
| TCGA-CJ-60281625 | 1 | 58 | MALE   | G4 | Stage IV  | T3a | M1 | NX |
| TCGA-CJ-48881567 | 1 | 59 | MALE   | G4 | Stage IV  | T3a | M1 | NX |
| TCGA-CZ-5462311  | 1 | 83 | MALE   | G3 | Stage IV  | T1b | M1 | NX |
| TCGA-B0-48241657 | 1 | 49 | FEMALE | G3 | Stage I   | T1a | M0 | N0 |
| TCGA-B0-5120493  | 0 | 72 | FEMALE | G2 | Stage I   | T1a | M0 | N0 |
| TCGA-BP-4761182  | 0 | 57 | MALE   | G4 | Stage III | T3a | M0 | N1 |
| TCGA-BP-43382859 | 0 | 43 | MALE   | G3 | Stage I   | T1b | M0 | N0 |
| TCGA-B0-5108911  | 0 | 54 | MALE   | G2 | Stage III | T3a | M0 | N0 |
| TCGA-BP-4329845  | 1 | 75 | MALE   | G2 | Stage III | T3a | M0 | N0 |
| TCGA-CZ-5463662  | 0 | 76 | MALE   | G2 | Stage II  | T2  | M0 | NX |
| TCGA-B0-57021605 | 0 | 71 | MALE   | G2 | Stage I   | T1b | M0 | N0 |
| TCGA-A3-33201508 | 0 | 52 | FEMALE | G1 | Stage I   | T1b | M0 | NX |
| TCGA-B8-A54K469  | 0 | 61 | MALE   | G1 | Stage I   | T1a | MX | NX |
| TCGA-BP-4352344  | 1 | 74 | FEMALE | G4 | Stage IV  | T3b | M1 | N0 |
| TCGA-BP-4349372  | 0 | 68 | FEMALE | G2 | Stage I   | T1a | M0 | NX |
| TCGA-BP-47691876 | 0 | 63 | MALE   | G2 | Stage I   | T1a | M0 | NX |
| TCGA-CJ-46431793 | 0 | 67 | FEMALE | G3 | Stage II  | T2b | M0 | N0 |
| TCGA-BP-49811097 | 1 | 75 | FEMALE | G3 | Stage III | T3a | M0 | NX |
| TCGA-BP-4992501  | 0 | 66 | MALE   | G4 | Stage I   | T1b | M0 | NX |
| TCGA-BP-50041126 | 0 | 53 | MALE   | G3 | Stage I   | T1a | M0 | NX |
| TCGA-CJ-46392308 | 0 | 49 | FEMALE | G2 | Stage II  | T2  | M0 | N0 |
| TCGA-BP-49611935 | 0 | 47 | MALE   | G2 | Stage I   | T1a | M0 | NX |

## Supplementary File S2

AMBRA1  
 APOL1  
 ARNT  
 ARSA  
 ARSB  
 ATF4  
 ATF6  
 ATG10  
 ATG12  
 ATG16L1  
 ATG16L2  
 ATG2A

ATG2B  
ATG3  
ATG4A  
ATG4B  
ATG4C  
ATG4D  
ATG5  
ATG7  
ATG9A  
ATG9B  
ATIC  
BAG1  
BAG3  
BAK1  
BAX  
BCL2  
BCL2L1  
BECN1  
BID  
BIRC5  
BIRC6  
BNIP1  
BNIP3  
BNIP3L  
C12orf44  
C17orf88  
CALCOCO2  
CAMKK2  
CANX  
CAPN1  
CAPN10  
CAPN2  
CAPNS1  
CASP1  
CASP3  
CASP4  
CASP8  
CCL2  
CCR2  
CD46  
CDKN1A  
CDKN1B  
CDKN2A  
CFLAR

CHMP2B  
CHMP4B  
CLN3  
CTSB  
CTSD  
CTSL1  
CX3CL1  
CXCR4  
DAPK1  
DAPK2  
DDIT3  
DIRAS3  
DLC1  
DNAJB1  
DNAJB9  
DRAM1  
EDEM1  
EEF2  
EEF2K  
EGFR  
EIF2AK2  
EIF2AK3  
EIF2S1  
EIF4EBP1  
EIF4G1  
ERBB2  
ERN1  
ERO1L  
FADD  
FAM48A  
FAS  
FKBP1A  
FKBP1B  
FOS  
FOXO1  
FOXO3  
GAA  
GAA  
GABARAP  
GABARAP  
GABARAPL1  
GABARAPL1  
GABARAPL2  
GABARAPL2

GAPDH  
GAPDH  
GNAI3  
GNAI3  
GNB2L1  
GNB2L1  
GOPC  
GOPC  
GRID1  
GRID1  
GRID2  
GRID2  
HDAC1  
HDAC6  
HGS  
HIF1A  
HSP90AB1  
HSPA5  
HSPA8  
HSPB8  
IFNG  
IKBKB  
IKBKE  
IL24  
IRGM  
ITGA3  
ITGA6  
ITGB1  
ITGB4  
ITPR1  
KIAA0226  
KIAA0652  
KIAA0831  
KIF5B  
KLHL24  
LAMP1  
LAMP2  
MAP1LC3A  
MAP1LC3B  
MAP1LC3C  
MAP2K7  
MAPK1  
MAPK3  
MAPK8



MAPK8IP1  
MAPK9  
MBTPS2  
MLST8  
MTMR14  
MTOR  
MYC  
NAF1  
NAMPT  
NBR1  
NCKAP1  
NFE2L2  
NFKB1  
NKX2-3  
NLRC4  
NPC1  
NRG1  
NRG2  
NRG3  
P4HB  
PARK2  
PARP1  
PEA15  
PELP1  
PEX14  
PEX3  
PIK3C3  
PIK3R4  
PINK1  
PPP1R15A  
PRKAB1  
PRKAR1A  
PRKCD  
PRKCQ  
PTEN  
PTK6  
RAB11A  
RAB1A  
RAB24  
RAB33B  
RAB5A  
RAB7A  
RAC1  
RAF1

RB1  
RB1CC1  
RELA  
RGS19  
RHEB  
RPS6KB1  
RPTOR  
SAR1A  
SERPINA1  
SESN2  
SH3GLB1  
SIRT1  
SIRT2  
SPHK1  
SPNS1  
SQSTM1  
ST13  
STK11  
TBK1  
TM9SF1  
TMEM49  
TMEM74  
TNFSF10  
TP53  
TP53INP2  
TP63  
TP73  
TSC1  
TSC2  
TUSC1  
ULK1  
ULK2  
ULK3  
USP10  
UVRAG  
VAMP3  
VAMP7  
VEGFA  
WDFY3  
WDR45  
WDR45L  
WIPI1  
WIPI2  
ZFYVE1

### Supplementary File S3

ID TCGA-AK-3440-01A-02R-1277-07 TCGA-A3-3365-01A-01R-0864-07  
TCGA-DV-5569-01A-01R-1541-07 TCGA-A3-A8CQ-01A-11R-A370-07  
TCGA-MM-A84U-01A-11R-A370-07 TCGA-CJ-4907-01A-01R-1426-07  
TCGA-BP-5196-01A-01R-1426-07 TCGA-CJ-4889-01A-01R-1305-07  
TCGA-AK-3428-01A-02R-1277-07 TCGA-BP-5170-01A-01R-1426-07  
TCGA-CJ-6027-01A-11R-1672-07 TCGA-BP-4983-01A-01R-1334-07  
TCGA-B4-5378-01A-01R-1503-07 TCGA-A3-3317-01A-02R-1325-07  
TCGA-BP-4756-01A-01R-1289-07 TCGA-B0-5088-01A-01R-1334-07  
TCGA-B0-4837-01A-01R-1305-07 TCGA-BP-5174-01A-01R-1426-07  
TCGA-BP-4803-01A-01R-1305-07 TCGA-B0-5097-01A-01R-1420-07  
TCGA-B0-5119-01A-02R-1420-07 TCGA-BP-4345-01A-01R-1289-07  
TCGA-AK-3453-01A-02R-1277-07 TCGA-BP-4342-01A-01R-1289-07  
TCGA-B0-4844-01A-01R-1277-07 TCGA-BP-4804-01A-02R-1305-07  
TCGA-CW-6088-01A-11R-1672-07 TCGA-B0-5701-01A-11R-1541-07  
TCGA-CJ-5681-01A-11R-1541-07 TCGA-CJ-4876-01A-01R-1305-07  
TCGA-B0-4834-01A-01R-1305-07 TCGA-B0-5713-01A-11R-1672-07  
TCGA-BP-5009-01A-01R-1334-07 TCGA-CJ-4900-01A-01R-1334-07  
TCGA-BP-5186-01A-01R-1426-07 TCGA-A3-3370-01A-02R-1420-07  
TCGA-B0-4810-01A-01R-1503-07 TCGA-CJ-4916-01A-01R-1426-07  
TCGA-B0-4846-01A-01R-1277-07 TCGA-CJ-4892-01A-01R-1305-07  
TCGA-CZ-4863-01A-01R-1503-07 TCGA-BP-4330-01A-01R-1289-07  
TCGA-CJ-4874-01A-01R-1305-07 TCGA-A3-3328-01A-01R-0864-07  
TCGA-CJ-4872-01A-01R-1305-07 TCGA-B8-A54K-01A-11R-A33J-07  
TCGA-CJ-4873-01A-01R-1305-07 TCGA-G6-A8L7-01A-11R-A370-07  
TCGA-CZ-5467-01A-01R-1503-07 TCGA-BP-4807-01A-01R-1305-07  
TCGA-CJ-4908-01A-01R-1426-07 TCGA-BP-4352-01A-01R-1289-07  
TCGA-A3-A8OU-01A-11R-A370-07 TCGA-AK-3434-01A-02R-1277-07  
TCGA-CJ-5683-01A-11R-1541-07 TCGA-A3-3326-01A-01R-0864-07  
TCGA-B0-5712-01A-11R-1672-07 TCGA-B0-4706-01A-01R-1503-07  
TCGA-CZ-5461-01A-01R-1503-07 TCGA-6D-AA2E-01A-11R-A370-07  
TCGA-EU-5907-01A-11R-1672-07 TCGA-A3-3380-01A-01R-0864-07  
TCGA-CJ-4638-01A-02R-1325-07 TCGA-BP-5184-01A-01R-1426-07  
TCGA-B0-5116-01A-02R-1420-07 TCGA-CZ-4857-01A-01R-1305-07  
TCGA-B8-5159-01A-01R-1420-07 TCGA-A3-3358-01A-01R-1541-07  
TCGA-A3-3372-01A-02R-1325-07 TCGA-B0-5096-01A-01R-1420-07  
TCGA-CZ-5986-01A-11R-1672-07 TCGA-BP-4974-01A-01R-1334-07  
TCGA-CW-5584-01A-01R-1541-07 TCGA-B4-5838-01A-11R-1672-07  
TCGA-BP-5201-01A-01R-1426-07 TCGA-BP-4965-01A-01R-1334-07  
TCGA-B4-5835-01A-11R-1672-07 TCGA-B0-5094-01A-01R-1420-07  
TCGA-DV-5567-01A-01R-1541-07 TCGA-BP-4334-01A-01R-1289-07  
TCGA-BP-5187-01A-01R-1426-07 TCGA-CZ-5988-01A-11R-1672-07

TCGA-CJ-4894-01A-01R-1305-07 TCGA-BP-4763-01A-01R-1289-07  
TCGA-B0-4828-01A-01R-1277-07 TCGA-CJ-5679-01A-11R-1541-07  
TCGA-CJ-4869-01A-02R-1426-07 TCGA-A3-3363-01A-01R-0864-07  
TCGA-BP-4777-01A-01R-1289-07 TCGA-BP-4789-01A-01R-1305-07  
TCGA-CZ-5462-01A-01R-1503-07 TCGA-B0-5705-01A-11R-1541-07  
TCGA-B0-4710-01A-01R-1503-07 TCGA-BP-5004-01A-01R-1334-07  
TCGA-A3-3387-01A-01R-1541-07 TCGA-BP-5175-01A-01R-1426-07  
TCGA-B2-5635-01A-01R-A277-07 TCGA-AK-3454-01A-02R-1277-07  
TCGA-BP-4782-01A-02R-1420-07 TCGA-CZ-5451-01A-01R-1503-07  
TCGA-CJ-5671-01A-11R-1541-07 TCGA-AK-3425-01A-02R-1277-07  
TCGA-CZ-4858-01A-01R-1305-07 TCGA-B0-4841-01A-01R-1277-07  
TCGA-BP-4331-01A-01R-1289-07 TCGA-BP-4174-01A-02R-1289-07  
TCGA-CJ-6028-01A-11R-1672-07 TCGA-A3-3367-01A-02R-1420-07  
TCGA-A3-3351-01A-02R-1325-07 TCGA-CJ-4890-01A-01R-1305-07  
TCGA-CW-5581-01A-02R-1541-07 TCGA-B0-4815-01A-01R-1503-07  
TCGA-BP-4993-01A-02R-1420-07 TCGA-B0-4821-01A-01R-1503-07  
TCGA-B0-4813-01A-01R-1277-07 TCGA-CZ-5459-01A-01R-1503-07  
TCGA-B0-5108-01A-01R-1420-07 TCGA-CZ-4862-01A-01R-1305-07  
TCGA-MM-A564-01A-11R-A266-07 TCGA-A3-3325-01A-01R-0864-07  
TCGA-CW-6090-01A-11R-1672-07 TCGA-BP-4177-01A-02R-1420-07  
TCGA-BP-4170-01A-02R-1289-07 TCGA-A3-3357-01A-02R-1420-07  
TCGA-BP-4960-01A-01R-1334-07 TCGA-B2-3923-01A-02R-A277-07  
TCGA-A3-3319-01A-02R-1325-07 TCGA-BP-5007-01A-01R-1334-07  
TCGA-B8-A54D-01A-21R-A266-07 TCGA-B0-4833-01A-01R-1305-07  
TCGA-BP-4347-01A-01R-1289-07 TCGA-CW-5590-01A-01R-1541-07  
TCGA-B0-4822-01A-01R-1277-07 TCGA-B0-4703-01A-01R-1277-07  
TCGA-BP-5192-01A-01R-1426-07 TCGA-A3-3323-01A-02R-1325-07  
TCGA-CJ-4895-01A-01R-1305-07 TCGA-CW-5591-01A-01R-1541-07  
TCGA-BP-4799-01A-01R-1305-07 TCGA-B0-4847-01A-01R-1277-07  
TCGA-CW-6087-01A-11R-1672-07 TCGA-BP-4173-01A-02R-1289-07  
TCGA-B8-4619-01A-02R-1325-07 TCGA-BP-4176-01A-02R-1289-07  
TCGA-BP-4768-01A-01R-1289-07 TCGA-B8-A54I-01A-21R-A33J-07  
TCGA-BP-4341-01A-01R-1289-07 TCGA-B0-5099-01A-01R-1420-07  
TCGA-B0-4816-01A-01R-1503-07 TCGA-A3-3311-01A-02R-1325-07  
TCGA-BP-4963-01A-01R-1334-07 TCGA-BP-4354-01A-02R-1289-07  
TCGA-B8-A54G-01A-11R-A266-07 TCGA-BP-4961-01A-01R-1334-07  
TCGA-B0-5698-01A-11R-1672-07 TCGA-BP-5199-01A-01R-1426-07  
TCGA-CW-6093-01A-11R-1672-07 TCGA-B0-4700-01A-02R-1541-07  
TCGA-AK-3460-01A-02R-1277-07 TCGA-AK-3458-01A-01R-1503-07  
TCGA-CZ-5984-01A-11R-1672-07 TCGA-A3-3324-01A-02R-1325-07  
TCGA-CJ-4912-01A-01R-1426-07 TCGA-CZ-5453-01A-01R-1503-07  
TCGA-A3-3378-01A-02R-1325-07 TCGA-A3-3343-01A-01R-0864-07  
TCGA-CJ-4887-01A-01R-1305-07 TCGA-DV-5574-01A-01R-1541-07  
TCGA-CZ-5454-01A-01R-1503-07 TCGA-BP-4790-01A-01R-1305-07

TCGA-B0-5107-01A-01R-1420-07 TCGA-CZ-5466-01A-01R-1503-07  
TCGA-AK-3450-01A-02R-1277-07 TCGA-CZ-5460-01A-01R-1503-07  
TCGA-B0-4845-01A-01R-1277-07 TCGA-MM-A563-01A-11R-A266-07  
TCGA-BP-4971-01A-01R-1334-07 TCGA-BP-4759-01A-01R-1289-07  
TCGA-BP-4329-01A-02R-1289-07 TCGA-B0-4712-01A-01R-1503-07  
TCGA-B0-4691-01A-01R-1277-07 TCGA-CZ-5982-01A-11R-1672-07  
TCGA-BP-4962-01A-01R-1334-07 TCGA-BP-4355-01A-01R-1289-07  
TCGA-A3-3359-01A-01R-0864-07 TCGA-AK-3433-01A-02R-1277-07  
TCGA-B0-4827-01A-02R-1420-07 TCGA-B2-A4SR-01A-11R-A266-07  
TCGA-BP-4332-01A-01R-1289-07 TCGA-CJ-4643-01A-02R-1325-07  
TCGA-B0-5083-01A-02R-1420-07 TCGA-B0-4697-01A-01R-1277-07  
TCGA-B2-3924-01A-02R-1325-07 TCGA-DV-A4VZ-01A-11R-A266-07  
TCGA-B8-4151-01A-01R-1188-07 TCGA-BP-4982-01A-01R-1334-07  
TCGA-B0-4713-01A-01R-1277-07 TCGA-CJ-4902-01A-01R-1426-07  
TCGA-B0-5399-01A-01R-1503-07 TCGA-B0-4707-01A-01R-1277-07  
TCGA-CZ-4865-01A-02R-1503-07 TCGA-BP-4344-01A-01R-1289-07  
TCGA-DV-5565-01A-01R-1541-07 TCGA-AK-3436-01A-02R-1325-07  
TCGA-A3-A6NJ-01A-12R-A33J-07 TCGA-BP-5191-01A-01R-1426-07  
TCGA-B8-4154-01A-01R-1188-07 TCGA-B0-4688-01A-01R-1277-07  
TCGA-BP-4986-01A-01R-1334-07 TCGA-B0-5075-01A-01R-1334-07  
TCGA-BP-4775-01A-01R-1289-07 TCGA-CJ-4888-01A-01R-1305-07  
TCGA-AK-3431-01A-02R-1277-07 TCGA-BP-4338-01A-01R-1289-07  
TCGA-B0-4701-01A-01R-1277-07 TCGA-B8-4143-01A-01R-1188-07  
TCGA-CJ-5675-01A-11R-1541-07 TCGA-BP-4760-01A-02R-1420-07  
TCGA-B0-5113-01A-01R-1420-07 TCGA-BP-4340-01A-01R-1289-07  
TCGA-B8-A7U6-01A-12R-A37O-07 TCGA-B8-5551-01A-01R-1541-07  
TCGA-B0-5400-01A-01R-1503-07 TCGA-BP-4994-01A-01R-1334-07  
TCGA-A3-3349-01A-01R-1188-07 TCGA-AK-3455-01A-01R-0864-07  
TCGA-CW-5585-01A-01R-1541-07 TCGA-BP-4981-01A-01R-1334-07  
TCGA-BP-4337-01A-01R-1289-07 TCGA-CJ-5686-01A-11R-1672-07  
TCGA-A3-A8OV-01A-11R-A37O-07 TCGA-AK-3447-01A-01R-1766-07  
TCGA-A3-3306-01A-01R-0864-07 TCGA-B0-4839-01A-01R-1305-07  
TCGA-CJ-5678-01A-11R-1541-07 TCGA-DV-A4VX-01A-11R-A266-07  
TCGA-CJ-6030-01A-11R-1672-07 TCGA-B0-4818-01A-01R-1503-07  
TCGA-B0-5706-01A-11R-1541-07 TCGA-BP-4973-01A-01R-1334-07  
TCGA-B8-5165-01A-01R-1420-07 TCGA-CJ-4901-01A-01R-1426-07  
TCGA-B0-5110-01A-01R-1420-07 TCGA-B0-4838-01A-01R-1305-07  
TCGA-BP-4968-01A-01R-1334-07 TCGA-A3-A8OX-01A-11R-A37O-07  
TCGA-A3-A6NN-01A-12R-A33J-07 TCGA-B0-4814-01A-01R-1277-07  
TCGA-B0-4823-01A-02R-1420-07 TCGA-B0-5098-01A-01R-1420-07  
TCGA-B0-5711-01A-11R-1672-07 TCGA-CJ-4868-01A-01R-1305-07  
TCGA-B8-4148-01A-02R-1325-07 TCGA-CJ-4886-01A-01R-1305-07  
TCGA-AK-3429-01A-02R-1325-07 TCGA-CZ-5465-01A-01R-1503-07  
TCGA-B0-4714-01A-01R-1277-07 TCGA-AK-3461-01A-02R-1277-07

TCGA-CJ-4897-01A-03R-1426-07 TCGA-BP-4776-01A-01R-1289-07  
TCGA-B4-5377-01A-01R-1503-07 TCGA-B8-4153-01B-11R-1672-07  
TCGA-B0-4698-01A-01R-1503-07 TCGA-B0-5106-01A-01R-1420-07  
TCGA-B0-4718-01A-01R-1277-07 TCGA-B0-5696-01A-11R-1541-07  
TCGA-BP-4326-01A-01R-1289-07 TCGA-CZ-4856-01A-02R-1426-07  
TCGA-B2-5635-01A-01R-1541-07 TCGA-BP-4972-01A-01R-1334-07  
TCGA-BP-5169-01A-01R-1426-07 TCGA-B2-5633-01A-01R-A277-07  
TCGA-B0-5693-01A-11R-1541-07 TCGA-BP-4969-01A-01R-1334-07  
TCGA-BP-4165-01A-02R-1289-07 TCGA-CJ-4870-01A-01R-1305-07  
TCGA-B8-5552-01B-11R-1672-07 TCGA-BP-4164-01A-02R-1325-07  
TCGA-BP-4987-01A-01R-1334-07 TCGA-BP-4769-01A-01R-1289-07  
TCGA-BP-4161-01A-02R-1325-07 TCGA-BP-5010-01A-02R-1420-07  
TCGA-B2-3923-01B-10R-A277-07 TCGA-AK-3445-01A-02R-1277-07  
TCGA-B2-4102-01A-02R-1325-07 TCGA-B0-5702-01A-11R-1541-07  
TCGA-CJ-4918-01A-01R-1426-07 TCGA-B0-4848-01A-01R-1277-07  
TCGA-BP-5194-01A-02R-1426-07 TCGA-B2-5635-01B-04R-A277-07  
TCGA-B2-5641-01A-01R-1541-07 TCGA-CJ-4882-01A-02R-1426-07  
TCGA-BP-4795-01A-02R-1420-07 TCGA-CW-5588-01A-01R-1541-07  
TCGA-CZ-5464-01A-01R-1503-07 TCGA-BP-4762-01A-02R-1289-07  
TCGA-B2-5633-01A-01R-1541-07 TCGA-BP-5178-01A-01R-1426-07  
TCGA-B0-5115-01A-01R-1420-07 TCGA-B8-4622-01A-02R-1277-07  
TCGA-B0-5102-01A-01R-1420-07 TCGA-BP-5008-01A-01R-1334-07  
TCGA-CJ-4642-01B-01R-1305-07 TCGA-A3-3362-01A-02R-1325-07  
TCGA-B2-5639-01A-01R-1541-07 TCGA-CZ-5458-01A-01R-1503-07  
TCGA-AS-3778-01A-01R-A32Z-07 TCGA-B0-4693-01A-01R-1277-07  
TCGA-CJ-4884-01A-01R-1305-07 TCGA-BP-4771-01A-01R-1289-07  
TCGA-A3-3352-01A-01R-0864-07 TCGA-B0-5084-01A-01R-1334-07  
TCGA-BP-4159-01A-02R-1289-07 TCGA-B8-A54J-01A-11R-A33J-07  
TCGA-CJ-4644-01A-02R-1325-07 TCGA-B4-5836-01A-11R-1672-07  
TCGA-B0-5117-01A-01R-1420-07 TCGA-CJ-5680-01A-11R-1541-07  
TCGA-DV-A4W0-05A-11R-A266-07 TCGA-CW-5589-01A-01R-1541-07  
TCGA-BP-5000-01A-01R-1334-07 TCGA-A3-3346-01A-01R-1766-07  
TCGA-CJ-5689-01A-11R-1541-07 TCGA-CJ-5677-01A-11R-1541-07  
TCGA-BP-4167-01A-02R-1325-07 TCGA-CW-6097-01A-11R-1672-07  
TCGA-B8-5162-01A-01R-1420-07 TCGA-CJ-6031-01A-11R-1672-07  
TCGA-CJ-4639-01A-02R-1325-07 TCGA-A3-3374-01A-02R-1325-07  
TCGA-CZ-5470-01A-01R-1503-07 TCGA-CZ-5463-01A-01R-1503-07  
TCGA-CJ-4881-01A-01R-1305-07 TCGA-B0-5077-01A-01R-1334-07  
TCGA-B0-5092-01A-01R-1420-07 TCGA-EU-5905-01A-11R-1672-07  
TCGA-BP-5168-01A-01R-1420-07 TCGA-B4-5832-01A-11R-1672-07  
TCGA-B8-5163-01A-01R-1420-07 TCGA-DV-5575-01A-01R-1541-07  
TCGA-CW-5580-01A-01R-1672-07 TCGA-B0-5692-01A-11R-1541-07  
TCGA-CJ-4640-01A-02R-1325-07 TCGA-A3-3316-01A-01R-0864-07  
TCGA-BP-4797-01A-01R-1305-07 TCGA-BP-5195-01A-02R-1426-07

TCGA-B0-5691-01A-11R-1541-07 TCGA-BP-5006-01A-01R-1334-07  
TCGA-CZ-5469-01A-01R-1503-07 TCGA-BP-4999-01A-01R-1334-07  
TCGA-EU-5904-01A-11R-1672-07 TCGA-B2-3924-01B-03R-A277-07  
TCGA-B2-3924-01A-02R-A277-07 TCGA-BP-5189-01A-02R-1426-07  
TCGA-B0-5812-01A-11R-1672-07 TCGA-A3-3385-01A-02R-1420-07  
TCGA-BP-4787-01A-01R-1305-07 TCGA-BP-4325-01A-02R-1289-07  
TCGA-CJ-4878-01A-01R-1305-07 TCGA-CJ-5672-01A-11R-1541-07  
TCGA-BP-4765-01A-01R-1289-07 TCGA-BP-4970-01A-01R-1334-07  
TCGA-B0-4819-01A-01R-1277-07 TCGA-G6-A5PC-01A-11R-A33J-07  
TCGA-BP-4992-01A-01R-1334-07 TCGA-CZ-4864-01A-01R-1503-07  
TCGA-BP-5198-01A-01R-1426-07 TCGA-BP-4349-01A-01R-1289-07  
TCGA-BP-5181-01A-01R-1426-07 TCGA-EU-5906-01A-11R-1672-07  
TCGA-B8-4620-01A-02R-1325-07 TCGA-BP-4959-01A-01R-1334-07  
TCGA-CJ-4905-01A-02R-1426-07 TCGA-CJ-6032-01A-11R-1672-07  
TCGA-B0-5703-01A-11R-1541-07 TCGA-B8-A54F-01A-11R-A266-07  
TCGA-B0-5095-01A-01R-1420-07 TCGA-CZ-4861-01A-01R-1305-07  
TCGA-BP-4964-01A-01R-1334-07 TCGA-B0-5402-01A-01R-1503-07  
TCGA-CJ-4891-01A-01R-1305-07 TCGA-B0-4690-01A-01R-1277-07  
TCGA-A3-3322-01A-02R-1325-07 TCGA-B0-4699-01A-01R-1277-07  
TCGA-B8-5550-01A-01R-1541-07 TCGA-A3-A8OW-01A-11R-A37O-07  
TCGA-B0-4817-01A-01R-1277-07 TCGA-CZ-5452-01A-01R-1503-07  
TCGA-B0-5699-01A-11R-1541-07 TCGA-B0-5120-01A-01R-1420-07  
TCGA-B0-5100-01A-01R-1420-07 TCGA-B0-4945-01A-01R-1420-07  
TCGA-BP-4781-01A-01R-1305-07 TCGA-CJ-5684-01A-11R-1541-07  
TCGA-BP-4346-01A-01R-1289-07 TCGA-AK-3426-01A-02R-1325-07  
TCGA-CJ-5682-01A-11R-1541-07 TCGA-A3-A6NL-01A-11R-A33J-07  
TCGA-B2-5633-01B-04R-A277-07 TCGA-CZ-5987-01A-11R-1672-07  
TCGA-A3-3382-01A-02R-1325-07 TCGA-CJ-4636-01A-02R-1325-07  
TCGA-CW-5583-01A-02R-1541-07 TCGA-B0-4849-01A-01R-1277-07  
TCGA-B0-4852-01A-01R-1503-07 TCGA-BP-4995-01A-01R-1334-07  
TCGA-BP-4798-01A-01R-1305-07 TCGA-B0-5700-01A-11R-1541-07  
TCGA-AK-3456-01A-02R-1325-07 TCGA-CJ-4641-01A-02R-1325-07  
TCGA-BP-4335-01A-01R-1289-07 TCGA-B8-4146-01B-11R-1672-07  
TCGA-B0-4694-01A-01R-1277-07 TCGA-B0-4836-01A-01R-1305-07  
TCGA-CJ-4635-01A-02R-1305-07 TCGA-BP-4975-01A-01R-1334-07  
TCGA-B8-A54E-01A-11R-A266-07 TCGA-A3-3376-01A-02R-1420-07  
TCGA-BP-4758-01A-01R-1289-07 TCGA-B0-5121-01A-02R-1420-07  
TCGA-BP-5180-01A-01R-1426-07 TCGA-DV-5566-01A-01R-1541-07  
TCGA-BP-4784-01A-01R-1305-07 TCGA-A3-3331-01A-02R-1325-07  
TCGA-CZ-5455-01A-01R-1503-07 TCGA-A3-3383-01A-02R-1325-07  
TCGA-CJ-4875-01A-01R-1305-07 TCGA-B0-4811-01A-01R-1503-07  
TCGA-B0-4824-01A-01R-1277-07 TCGA-CJ-4871-01A-01R-1305-07  
TCGA-B0-5690-01A-11R-1541-07 TCGA-B8-5549-01A-01R-1541-07  
TCGA-DV-A4W0-01A-11R-A266-07 TCGA-CZ-5989-01A-11R-1672-07

TCGA-B0-5081-01A-01R-1334-07 TCGA-CZ-4866-01A-01R-1503-07  
TCGA-BP-5182-01A-01R-1426-07 TCGA-CJ-6033-01A-11R-1672-07  
TCGA-CJ-4637-01A-02R-1325-07 TCGA-CJ-4885-01A-01R-1305-07  
TCGA-B8-5546-01A-01R-1541-07 TCGA-B8-5545-01A-01R-1672-07  
TCGA-CJ-5676-01A-11R-1541-07 TCGA-B0-5707-01A-11R-1541-07  
TCGA-BP-5190-01A-01R-1426-07 TCGA-B0-5709-01A-11R-1541-07  
TCGA-B0-5109-01A-02R-1420-07 TCGA-B4-5843-01A-11R-1672-07  
TCGA-B2-4098-01A-02R-1325-07 TCGA-CJ-4893-01A-01R-1305-07  
TCGA-BP-4985-01A-01R-1334-07 TCGA-BP-5001-01A-01R-1334-07  
TCGA-A3-3313-01A-02R-1325-07 TCGA-BP-4169-01A-02R-1289-07  
TCGA-B8-5553-01A-01R-1541-07 TCGA-AK-3443-01A-02R-1325-07  
TCGA-B0-4696-01A-01R-1277-07 TCGA-DV-5576-01A-01R-1541-07  
TCGA-A3-3329-01A-01R-0864-07 TCGA-B8-5158-01A-01R-1420-07  
TCGA-B0-5695-01A-11R-1541-07 TCGA-BP-5176-01A-01R-1426-07  
TCGA-CZ-4859-01A-02R-1426-07 TCGA-CW-5587-01A-01R-1541-07  
TCGA-B4-5844-01A-11R-1672-07 TCGA-BP-4801-01A-02R-1420-07  
TCGA-A3-3307-01A-01R-0864-07 TCGA-B4-5834-01A-11R-1672-07  
TCGA-G6-A8L6-01A-11R-A37O-07 TCGA-BP-4991-01A-01R-1334-07  
TCGA-A3-3347-01A-02R-1325-07 TCGA-B2-5636-01A-02R-1541-07  
TCGA-BP-4327-01A-01R-1289-07 TCGA-BP-5200-01A-01R-1426-07  
TCGA-BP-4160-01A-02R-1289-07 TCGA-CZ-5468-01A-01R-1503-07  
TCGA-CJ-4904-01A-02R-1426-07 TCGA-T7-A92I-01A-11R-A37O-07  
TCGA-B0-5085-01A-01R-1334-07 TCGA-CZ-4853-01A-01R-1426-07  
TCGA-A3-A6NI-01A-11R-A33J-07 TCGA-AK-3465-01A-02R-1325-07  
TCGA-BP-4989-01A-01R-1334-07 TCGA-G6-A8L8-01A-21R-A37O-07  
TCGA-BP-4162-01A-02R-1325-07 TCGA-BP-5173-01A-01R-1426-07  
TCGA-B8-A8YJ-01A-13R-A39I-07 TCGA-B0-5080-01A-01R-1503-07  
TCGA-BP-4976-01A-01R-1334-07 TCGA-BP-4163-01A-02R-1325-07  
TCGA-CJ-4899-01A-01R-1334-07 TCGA-BP-4977-01A-01R-1334-07  
TCGA-A3-3335-01A-01R-0864-07 TCGA-CJ-4634-01A-02R-1325-07  
TCGA-B2-4101-01A-02R-1277-07 TCGA-BP-5185-01A-01R-1426-07  
TCGA-AK-3427-01A-01R-0864-07 TCGA-BP-4998-01A-01R-1334-07  
TCGA-BP-5202-01A-02R-1426-07 TCGA-B8-5164-01A-01R-1420-07  
TCGA-DV-5573-01A-01R-1541-07 TCGA-B0-5697-01A-11R-1541-07  
TCGA-CJ-4920-01A-01R-1426-07 TCGA-BP-5177-01A-01R-1426-07  
TCGA-B0-4842-01A-02R-1420-07 TCGA-BP-4343-01A-02R-1289-07  
TCGA-MW-A4EC-01A-11R-A266-07 TCGA-B2-3923-01A-02R-1325-07  
TCGA-BP-4967-01A-01R-1334-07 TCGA-BP-4770-01A-01R-1503-07  
TCGA-A3-3308-01A-02R-1325-07 TCGA-3Z-A93Z-01A-11R-A37O-07  
TCGA-B0-5710-01A-11R-1672-07 TCGA-BP-4353-01A-02R-1289-07  
TCGA-GK-A6C7-01A-11R-A33J-07 TCGA-BP-4761-01A-01R-1289-07  
TCGA-B0-4843-01A-01R-1277-07 TCGA-BP-4766-01A-01R-1289-07  
TCGA-B8-A54H-01A-11R-A33J-07 TCGA-BP-4774-01A-01R-1289-07  
TCGA-A3-3373-01A-02R-1420-07 TCGA-CZ-4860-01A-01R-1305-07



TCGA-AK-3451-01A-02R-1188-07 TCGA-B0-5104-01A-01R-1420-07  
TCGA-BP-4351-01A-01R-1289-07 TCGA-B2-4099-01A-02R-1188-07  
TCGA-B0-5694-01A-11R-1541-07 TCGA-CJ-4903-01A-01R-1426-07  
TCGA-CZ-5457-01A-01R-1503-07 TCGA-BP-4158-01A-02R-1289-07  
TCGA-A3-3320-01A-02R-1325-07 TCGA-DV-5568-01A-01R-1541-07  
TCGA-CZ-5985-01A-11R-1672-07 TCGA-BP-4166-01A-02R-1289-07  
TCGA-AS-3777-01A-01R-0864-07 TCGA-CZ-5456-01A-01R-1503-07  
TCGA-BP-5183-01A-01R-1426-07 TCGA-CZ-4854-01A-01R-1305-07  
TCGA-B8-4621-01A-01R-1503-07

PAN3-AS1 0.3861439 1.649971975 0.507747 1.67139058 0.882319804 0.734307439  
0.6747403 1.249985586 0.4726472 0.321767 0.246413194 0.8396577  
1.048923 1.391581 1.806008 0.9093009 0.4436227 0.281678268 0.6292826  
0.6782072 0.456045219 1.18805 1.895279768 1.5941 0.8061501 1.084923516  
1.169426 0.244712 1.256628 1.155342 0.5543652 0.533789265 0.6702694  
1.771101274 0.5930422 0.724956901 1.263136486 0.948554136 1.343799  
2.155329 0.988902724 1.355304 0.3640082 1.176114 0.987793763 1.920959  
1.003377 0.6242432 0.643271222 0.7042226 1.149862 1.413636 1.94474053  
1.073996 0.471436128 1.659473 1.351181 1.184337 0.5101263 2.241718 0.4371363  
2.240944 2.227380538 0.5773305 0.2032588 0.7349573 0.3424382  
0.7935985 1.368054 0.1448303 1.091776 1.508359462 0.5547396 0.7649334  
0.63993552 0.5019493 0.092662114 0.6434773 1.209546 0.6934587  
0.7890421 0.5583213 1.098387 0.743202603 1.543788248 0.348269 0.2969477  
2.128538 0.661253126 1.055542 0.3142619 0.4003146 1.394678347 0.7806046  
1.213854 0.236505244 0.838048 1.320607144 0.654396029 0.5234933 0.527822712  
0.1941812 0.7845192 0.24369619 1.075396 0.4792076 0.260214855  
0.997373 2.144634915 0.6347041 0.3562073 1.465390029 0.4962551  
1.565614 2.444332 0.6384541 0.5151465 1.856030492 1.580605 1.665937  
0.5128311 0.7256574 0.5056018 0.4236448 0.5536493 0.8035093  
0.2399892 1.207501 2.874261 1.597713994 1.728639307 0.8793866 1.333155566  
1.440796995 0.5664622 1.579584585 0.587434 0.4733823 0.187092742  
2.084508092 0.292728607 0.683799323 1.199011 0.4210492 0.9865259  
0.6082621 1.278603 0.77127 1.510625631 0.6228772 1.022642 1.172004029  
2.359153 1.510105 0.373817879 1.15108 0.6122304 0.38235238 0.6002007  
2.582638 0.503098428 0.7410446 0.9110216 0.9549658 1.081796283  
0.9528834 0.8489653 0.420933088 0.3190076 1.123634191 2.434924  
0.5178013 0.469356095 0.7764554 2.23093125 1.563681 2.517866 0.3882326  
0.8783455 0.1436179 0.946058201 0.5955692 0.5251409 2.019082  
1.459695 0.4569427 0.183022 1.777043 1.303509 1.286154928 0.673653991  
1.660553 0.5654893 1.572982 0.5799216 1.603827766 0.3278641 1.084072826  
1.295838 0.8045979 0.509216165 1.484028694 0.776512 0.4271054 0.961985613  
0.3884736 0.8295047 3.854633 0.8196374 0.3480259 2.226225 0.8077608  
0.5016087 0.2684209 1.047346 2.231076 0.5353694 1.2909 0.789620253  
1.510732 1.278678 0.385880026 0.4564082 0.5520062 1.627225 0.6577567  
0.6320671 1.33362786 2.416487 0.3887013 1.638995 0.1766985 1.036637

0.340150647 0.5741262 1.224423 0.4682685 1.485621566 0.184449188  
0.6631666 0.649511 0.6700995 1.199483141 0.6822615 1.278484 1.157523033  
3.300856 1.492109 0.4812794 0.6598621 0.658919 0.4612083 1.264787041  
0.7302935 0.591578648 0.7353007 2.432603 0.9476868 0.7647533  
0.8300827 0.5294026 0.8626016 0.731633126 1.455534 2.155452 0.592672972  
0.8432344 0.3226777 0.795602 0.5524086 0.655155 0.4634021 0.6508326  
1.462656 1.352139955 0.7772285 0.668911696 1.628371 1.060735 1.262276  
1.27451799 1.063785567 1.770637 0.4643688 1.268191 1.411997 0.3793387  
0.533521348 0.9901089 2.617085 0.2106449 1.274013392 0.8879092  
0.3652994 0.448728591 0.5434592 0.668554164 0.2853145 1.251576  
1.119470737 1.072221 0.9215508 1.54129268 1.4437934 0.7215491  
0.8034882 0.9100433 0.7519777 0.7255822 1.584426 1.275864 0.9233281  
0.4938649 1.144553011 0.4603503 0.600531017 0.674515 0.466178496  
1.289456 0.7053521 0.47514478 0.724511 0.6631392 0.3376533 0.602034074  
0.2196371 0.4434012 0.398129514 0.651787004 0.4207293 0.7240241  
1.24799 0.966475474 0.591629894 1.869347131 0.3504907 0.8306155  
0.4394822 0.1840258 0.9056552 0.8102579 0.3697396 0.5305516  
1.022862 0.5310768 0.789648 0.72894519 0.8200944 0.3846378 1.661802  
0.6916692 3.180118 0.7557021 0.5745364 0.7897853 0.6710247  
0.3879252 0.978835711 0.7788221 0.927124 0.749358 0.5946159 1.138193836  
0.361406 2.368467 1.168106 0.9914394 2.256061 0.4860611 0.557629 0.866756406  
0.2704002 0.8313667 0.439759597 0.2607854 2.064932 1.215834 0.5336823  
0.8017091 0.584641052 0.704191118 0.8369246 1.949472 0.7685258  
0.735592983 1.470353554 0.917411622 0.4330482 0.7389166 0.8321979  
0.9050724 1.115792 0.4886035 0.4977308 1.798338241 1.322414623  
1.090666 1.171646277 3.371268 0.577831729 1.018655 0.9855552 0.6199552  
1.371177 1.49001 0.6298738 1.668497 0.6369072 0.4054638 1.559862082  
1.28994 0.7164103 0.4869575 0.6213026 1.326742139 0.4314871  
0.2264127 1.420917 0.856448709 0.5666931 0.670316 1.063715 0.9784576  
0.8513222 0.4246548 1.44788 1.623347306 1.272952282 1.946376805  
0.4670714 0.806971887 0.442626601 0.8179367 1.207788 1.015503965  
1.199803 0.5770272 0.2569243 0.964459911 0.6097419 1.085141 1.187227  
0.477876757 0.8628345 0.6163258 0.6018239 0.5043354 0.599907 1.28839  
0.7376841 0.3315605 1.490734 1.49034 1.379146 0.412440379 0.8129168  
0.7744181 1.213984 1.650241 0.2987009 0.8912233 0.5866912 0.436721454  
0.426942812 0.780548746 0.7997017 1.638614 0.8210334 1.168063 0.9905155  
0.950228883 0.9102138 2.289492 0.4401424 0.5453363 0.2473642  
0.342446794 3.947433 1.068708 0.6716339 1.065866 1.65206 2.313447 2.471898  
0.639693534 0.6787093 1.22353 0.540130252 0.3326065 1.466328 1.007529  
1.482629 0.8941938 1.026155144 1.196950906 0.324535348 0.4599142  
1.138081 0.6111438 0.5132155 1.012683 0.6159904 1.04059281 0.4984358  
0.385709293 0.6004988 0.9315057 0.7399565 0.7693327 0.2270092  
0.994227181 1.053375 0.7300835 1.070701 1.110158 0.2287582 0.8207224  
1.3978 2.235405291 1.308217 0.548271836 0.3870958 0.5494513 1.0566387

2.64902 1.039751 0.2989901 0.79329534 0.4309799 1.534246 1.155917  
0.521768445 0.4576162 1.335007 0.09038992 0.1770785 0.8253287  
0.9266576 0.3302984  
AC010245.2 0.4876657 1.42843891 0.3498828 0.895795119 1.349064426  
0.687055107 1.267488 0.72353493 0.02735845 0.7773907 0.923715155  
1.365786 0.5950101 1.175588 0.6474611 1.015517 0.5739882 0.611419248  
0.5801028 0.7549419 0.570756238 1.198341 1.940940882 1.464049 0.9705853  
0.921053891 0.7868286 0.5230072 0.3491424 1.211621 0.7584573  
0.84632476 1.540655 1.699862374 0.9062416 1.007112363 1.686249227  
1.168957875 0.8829509 2.015862 0.742247401 0.8546553 0.379260986  
0.9153284 1.033317879 0.7808887 2.17796 1.204445 0.328170812 0.39857  
0.9895344 4.026365 0.826040868 1.160443 0.75444276 1.377408 0.5214068  
2.368212 0.3163701 0.7969415 0.2952012 1.759933 1.040095433 0.6507694  
0.5398207 1.089072 0.2863106 0.487718 1.218273 0.6706622 0.5665826  
1.507631984 0.4919017 0.2787811 0.602712135 0.871637 0.300361819  
2.035266 0.403677 1.238599 0.9855642 0.6248064 0.7152573 0.543399657  
3.249447571 1.174482 0.5452859 1.378899 0.669823352 0.6369835 0.5633208  
0.5445325 0.509100609 0.4920046 0.8686948 1.01304093 1.09366  
3.01742026 0.406845378 0.3982496 0.894210902 0.276674 0.8409387  
0.394967415 0.9668247 0.6472245 0.868287875 1.021402 1.514318415  
0.942964344 0.2577314 1.599891764 0.4686705 1.670865 1.938475 0.6359858  
0.5828154 0.798620487 1.497123 1.354968 0.8905332 0.6109609 0.3464137  
1.129154 0.8588633 0.4961056 0.6251133 1.158932 2.079652 2.14647763  
1.133328433 0.8726047 2.372905525 1.397100027 0.3093282 1.362147583  
0.9647282 0.4414607 0.479595491 1.80987817 0.741306352 0.603772963  
0.8389362 0.9330913 0.4175312 1.388773 1.820645 0.4762003 1.188730075  
0.6695797 1.006979 1.656085586 1.04596 0.9723728 0.496398261 1.344685  
0.8023701 0.932700633 1.300012 1.533251 0.934301274 1.240633 1.43005  
0.380399 0.993722243 0.7778437 1.42131 0.619004337 0.2894555 0.728446173  
0.9447751 0.6523347 0.377332717 0.531731 1.624865202 1.049108 2.133675  
0.449445 0.4448647 0.581917 1.365277333 0.5628344 0.5027192 1.779462  
0.6870795 0.3458771 0.3295894 1.182501 1.712171 0.965054996 0.288212272  
2.643261 0.4567323 1.682251 0.3886806 1.018533705 1.797907 0.843523086  
1.083443 2.476316 0.607642471 1.395886673 0.6819575 1.097054 0.811381696  
1.349172 0.4401339 0.3310805 1.317253 0.8482081 0.4823697 0.9229754  
0.6636536 0.9322277 1.343559 1.788125 0.4311518 0.5447007 0.835766012  
0.6305658 0.7508696 0.264723813 0.5997711 0.7800055 1.500362  
1.280645 0.7435266 1.106947133 1.207661 0.746032 0.790589 0.1301735  
0.9153173 0.55421162 0.6466847 1.896917 0.579921 0.959920959 0.21353115  
0.7576259 0.5051955 0.8044851 0.83316284 1.4217 1.233384 1.055780273  
0.9202313 1.157011 0.5432333 0.4850172 0.5547711 1.174639 1.059212163  
0.830606 0.508747499 0.5252301 2.53097 1.5398 0.5651051 1.312532  
0.3592705 1.230427 0.883288699 1.623191 1.281989 0.699064914 0.6592429  
0.3628811 1.114166 0.6395065 0.8230019 0.5543486 0.7534488

1.629133 0.773871422 0.3630665 1.015578351 0.6875124 1.327211 1.245949  
1.163351558 1.142271838 2.673668 1.791952 1.042384 0.2790824 0.545609  
0.767372464 0.5059884 6.497063 0.4335238 0.893240885 0.526488 0.8608951  
0.761902953 0.2936015 0.698455849 0.4364677 0.9107441 1.033500513  
1.689161 0.7258987 0.39651269 0.742860091 0.5742792 0.3182173  
1.067576 1.015632 1.605852 1.084478 1.342753 1.546774 0.8039984 0.937931125  
0.3134902 0.508042669 0.5368449 0.738510163 0.7094321 0.3937007  
0.862594868 0.7818801 0.6663021 0.7817818 0.749228051 0.4290758  
0.4562772 0.384085242 0.891745357 0.3247102 0.7233612 0.4498652  
1.926923703 0.639250947 2.11130309 1.37505 0.5735729 2.212065 0.6972249  
0.6354237 0.6745246 0.7926596 0.5596074 1.420962 0.3688868  
0.7556983 0.466353312 0.8220398 0.7096703 1.25637 0.3727509  
4.155384 0.4999161 0.5960194 0.9271877 1.003897 1.176923 1.353915002  
1.522733 0.4629934 1.209625 0.5048036 1.526548037 0.3765497 3.893824  
0.8046626 0.3997812 1.502107 0.4501584 0.5164399 0.702392059  
0.6044794 0.5321769 0.323970282 0.7103605 0.4098015 1.043789  
0.4891135 0.8516811 0.408241214 1.122598576 0.7058996 1.164822  
0.8809761 0.43524861 0.883825829 1.081726976 0.5709552 0.6484643  
1.064065 1.479211 1.716392 0.8847209 0.9455715 1.646860979 1.773921701  
0.7726547 1.46207071 3.64508 0.768039945 1.684665 1.346691 0.5352362  
2.059289 1.076992 0.6908074 0.9225398 0.6015043 0.469393 0.767067333  
1.395401 1.658732 0.3489793 1.105209 0.827038456 0.4192394 0.8799443  
1.243278 0.628746157 0.5224048 0.2833031 0.5164064 0.7292921  
0.8212913 0.4452315 0.955025 2.217911713 2.341325313 1.32428471  
0.5136785 0.719798473 0.263527817 1.493189 2.157251 0.958756183 0.9431315  
0.3109686 0.7931558 1.049867327 0.5359455 0.3616433 0.4817541  
0.874449607 0.6599722 0.811433 0.3789141 0.8919985 0.7283717  
0.7562686 0.6286346 0.4741521 1.530689 1.037889 0.8089415 0.506407087  
0.5782594 0.8185618 0.6276509 0.831963 0.3573234 0.5099413  
0.495006 0.31598687 0.49425856 0.813255544 0.3178085 1.053874 0.4451639  
2.138984 1.402647 1.333394844 0.8057909 1.094091 0.4605452 0.2670965  
0.9371976 0.426935513 0.7078257 1.487599 0.6945933 0.9534837  
1.034867 1.714052 1.761009 0.722921299 0.7333395 1.048535 0.523500427  
0.4235531 0.6590382 1.328383 0.9451033 0.6768489 1.248097521  
0.934523815 0.647046791 0.5620078 1.079936 0.3648059 0.3998977  
0.9314574 0.5348349 0.756775025 0.8807206 0.46593786 0.5981773  
0.84611 0.6781613 0.8471873 0.4489527 0.924276815 1.295676 0.8007113  
0.7525643 0.7949664 1.132868 1.543953 0.7795662 0.741068982 1.135862  
0.537896134 0.5505584 0.2505781 0.707559303 1.990939 0.4909781  
0.6515419 0.750378439 0.6541555 1.711562 0.7272661 0.913419201  
0.5676087 0.3058795 0.2790444 0.3553305 0.6477679 1.499283  
0.5398254  
AC008770.3 0.6755768 1.491044909 0.24429 0.893498209 0.192229327 0.90017357  
0.7350218 0.76331508 0 0.3634675 0.406476465 1.135237 0.8478349

2.06286 0.7063447 1.173497 0.4519866 0.745374063 0.4373255 0.7530062  
0.711615951 0.6791298 0.98201078 1.104425 0.3723449 1.148365268  
0.7213337 0.2173609 0.3990332 0.9024622 1.563944 0.669964045  
1.177766 0.349588403 0.9244615 1.64805707 0.295650969 1.11885103  
0.7688536 0.8436474 1.38030275 1.844885 0.245187005 1.597717 0.44662295  
1.185262 0.9310182 0.07508481 0.125895903 0.4065832 0.9987471  
0.9068479 0.807767465 0.4650539 0.520351478 1.446185 0.5132268  
0.5525474 0.2103726 0.458595 0.6835314 0.3900935 0.216130942  
0.4385816 0.2761213 0.9759542 0.2471335 0.9899046 1.586444  
0.459898 1.086788 1.855914056 0.2385058 0.449813 0.500972266 0.8342746 0  
1.160975 0.6920409 0.05719552 0.4795303 0.4297961 2.113847 0.715147234  
0.455781889 0.3059811 0.3547094 1.528181 0.511305502 0.8103957  
0.292644 0.635585 0.83423501 1.352047 1.242361 0.546185616 1.847417 0.100322776  
0.699658939 0.3885931 0.222979513 0.2587168 0.4193912 0 1.188919  
0.2689854 0.44186811 0.8858981 2.239308515 0.549670025 0.6105426  
0.928584394 0.3392918 0.2118534 0.4444838 0.257171 0.4055728  
1.090546015 0.2592508 1.060478 0.2368666 0.5713072 0.6255202  
0.9385488 0.4794745 3.247345 0.4907258 1.459847 0.8642998 0.683289524  
1.171158407 0.2967161 0.384848968 0.710978428 0.8021912 1.488936874  
0.9859165 0.5693906 0.115733651 0.922029884 1.003478983 1.03716498  
1.179106 0.4514584 2.388524 0.2926503 0.6643817 1.001909 0.969067059  
0.8348285 0.8483085 0.79606709 0.676199 0.7480454 0.349126917  
1.178113 0.4001564 0.157679507 0.3353479 1.099199 0.695903555 1.843013  
1.069787 0.3260672 1.289884281 0.6347858 0.7540777 0.492620064  
0.2488908 1.29746136 0.6951781 0.3077456 0.489274757 0.252556  
1.151549205 0.461655 1.831651 0.3625896 0.3169457 0.0345491 0.486348793  
0.701739 0.2623762 1.504152 1.389158 1.927887 0.2641695 1.090605 1.085454  
0.928202621 0.465030284 0.5992007 1.025013 0.4324581 0.308385 1.560921946  
0.5977657 1.026049032 0.8312806 0.4532048 0.384456531 0.879754724  
0.2705376 0.1926481 0.872775836 0.1661373 0.2993218 0.7896843  
1.363981 1.26905 1.409032 0.7873628 0.20686 0.3874322 0.5311426  
1.756517 0.5711552 0.6617164 1.172282375 1.572372 0.1604881 0.288799256  
0.1068274 1.031092 0.4988384 0.6041575 0.6474461 0.653748635  
0.7623823 0.2657568 0.7447529 0.04637134 0.6593675 0.145471201  
0.04479351 0.1559384 0.345803 1.595766039 0.638950904 1.435798 0.6445234  
0.4656915 1.192676957 1.457445 0.5871513 0.472532821 0.6222859  
0.8939779 0.1736668 0.3628302 0.5879329 0.3994182 1.592512706  
0.813682 0.292755587 0.7225978 2.088919 1.055898 0.6575988 0.4675596  
0.5269842 0.7559283 0.331892549 0.9637078 0.4566794 0.129124526  
0.4741965 0.4258243 0.8890474 0.9697298 0.3219183 2.006591  
0.8794347 1.535391 1.271859486 0.3149005 0.854697069 0.2765119  
1.732084 1.189055 1.30895239 0.356044668 10.88948 0.7596267 1.757258  
0.2982501 0.7964049 0.280026162 0.9012339 9.737394 0.9121194  
0.466195041 0.4063568 0.3389557 0.431789407 0.1743147 0.894367149

0.264739 1.273149 0.859042093 1.212567 0.7953441 3.95495994 0.787265029  
0.1301833 0.2441549 0.7005519 1.266284 0.6468543 1.969758 1.363227  
0.8780205 0.2227602 0.556860817 0.390858 0.70010131 0.8113157  
0.389556828 0.958226 0.2181618 0.529946104 0.2481421 0.2167153  
0.08861105 0.086896157 0.2773916 0.3199973 0.351175374 1.083315242  
0.4385843 0.2576808 0.604035 0.503745511 1.195522203 1.096817444  
0.7307299 0.4206634 0.2757991 0.193177 0.4753458 0.3416537  
0.2767195 0.4764887 0.9448793 0.445989 0.8510201 0.664510764  
0.4908044 0.2081914 1.639862 0.2754038 9.089318 2.077643 0.6246465  
0.4816721 1.043044 0.6178449 1.431176456 0.5995377 0.2099119  
0.6702906 0.5035092 0.881524838 0.05216447 1.537353 1.281929 0.4823662  
1.451013 0.8418827 0.7181902 0.46467774 0.2422484 0.8188063  
0.201962243 0.4871206 0.5109384 1.183082 0.2567681 0.8440518  
0.428625728 0.233275025 0.5522272 1.134605 1.283275 0.188753299 1.183575401  
0.343303328 0.3125257 1.066535 0.860543 0.0768447 1.367828 0.3254947  
0.2947334 1.898331949 0.60594972 0.4699229 0.878507115 10.55832  
0.061779888 0.8401725 0.9328044 0.6673297 0.7488575 0.9388599  
1.220168 1.797215 0.1935361 0.5402186 1.155620537 1.037763 0.3244077  
0.1673483 0.4374504 1.669476589 1.000926 0.4668553 1.168546 0.693465466  
0.3938284 0.5528675 0.1981086 0.2708487 1.354807 0.6476311  
0.04860083 0.591052417 0.755545325 1.084311955 0.5393278 0.343700826  
0.255550657 0.5448878 0.7969333 0.853837352 1.026233 0.4882325  
0.4326449 1.080419021 0.2607665 0.7594021 0.2473259 0.311502653  
0.2668703 0.59306 0.5791054 0.4448557 0.5068633 0.8905278  
0.5028012 0.4785666 0.9729381 0.9075045 1.035126 0.216475117  
0.9612944 0.7775837 0.7145039 0.4225985 0.5748504 0.6210064  
0.3731732 0.236382486 0.129734534 0.56331269 0.2411908 1.385635  
0.2400121 0.3678447 2.042409 1.288414136 0.6182498 1.306469 0.3909483  
0.1816443 0.2596651 0.43091034 1.331511 0.7345467 0.9047922  
0.5943993 1.17594 2.077708 0.9605826 0.703480639 0.7510518 0.5504457  
0.181304902 0.6000953 1.095581 1.023356 1.598222 0.4633131 1.987336004  
1.446404896 0.156142185 0.4425527 1.561892 0.4686211 0.5698177  
0.8009216 0.4741898 0.8472633 0.3407828 0.145232234 0.1209412  
0.2068481 1.20154 1.218772 0 0.78275112 0.4434547 0.6285736  
0.404754 0.594696 0.1100614 0.3455116 0.9130525 0.821298673 0.8429686  
0.670646142 0.2234899 0.04806454 0.807420183 1.361257 0.9083501  
0.3553983 1.78735377 0.2764738 1.167642 1.196912 0.330632819 0.6605122  
0.6423056 0.2029481 0.3407879 1.372977 1.289171 0.7291392  
AL022328.2 0.6422202 1.423481936 0.9442243 3.528201052 2.319366969  
1.337737779 1.961819 1.649150905 0.349205 0.2362539 0.59447183 1.637847  
1.306385 3.784399 3.148279 4.10994 1.12926 1.090109567 0.4181925 1.293994  
1.352959827 2.16027 6.001225703 4.823231 1.429455 2.023015065 1.835614  
0.2384177 0.9549589 3.758706 0.372346 1.126795777 2.31715 3.962366051  
2.053075 3.902363705 2.858575305 4.09079908 1.916673 4.498354 2.064572153

4.186775 0.179292997 1.731633 0.778798769 3.714526 5.143876 1.592267 0.851567759  
0.7598024 3.587228 7.033942 5.788663595 1.398068 0.90736289 5.551995  
0.5003961 3.156643 0.2884405 1.900303 0.4613837 4.730493 3.793098033  
1.443208 0.2776313 1.799681 0.2811144 1.013415 5.035273 0.3057276  
0.5562997 4.036613072 0.2740687 0.2093164 2.335391804 1.557267  
0.625932577 1.988998 0.8280898 2.551278 0.4383207 0.2357163 2.511844  
0.192666311 2.814453164 1.150707 0.9510646 1.885752 1.944239173 1.137796  
0.6419877 1.014047 3.20931115 2.782964 1.444245 1.248119473 0.6754619  
3.741412534 0.793019678 1.515513 0.271756282 0.3468423 0.9813754  
1.491839535 5.699382 0.9553785 0.323116056 1.538556 6.132576885 1.228168962  
0.5639485 3.747224941 2.06756 4.879911 2.275202 0.6268542 1.804165  
2.565746576 4.511936 2.633008 0.6495326 0.6498619 0.8930418 2.537281  
2.8283 1.545388 2.490794 3.703616 6.067385 6.53715899 3.034668747 0.7232455  
2.497609668 1.299757439 1.150643 4.321115822 1.441903 0.2775779 0.056420155  
5.074500653 0.347586635 2.519934512 0.8622215 1.269727 2.911014 1.890338  
8.151133 4.558688 3.584835571 1.479212 2.853498 2.328496239 2.896184 2.112583  
0.8819422 5.721213 0.7559204 1.008902472 3.10616 2.23663 1.128384921  
2.334415 2.868367 1.408944 2.134673624 3.765073 3.087948 0.336213193 0.4732036  
1.676157895 4.151517 0.8037105 1.706345714 1.085004 3.992037243 4.163551  
6.31429 0.3856634 1.112479 0.2779043 1.559355819 1.026293 0.5969059  
7.314409 4.401893 1.224271 0.3434204 3.190019 3.571823 3.695406686 0.216397615  
3.154792 1.388038 5.312748 1.675191 3.076041415 2.331286 3.620189561 2.026247  
1.408476 0.661491384 3.300514597 1.102199 0.4226217 3.249106408 2.277899  
1.094395 1.574882 1.770914 2.107317 2.814627 1.616554 0.2647161 0.3021972  
2.151127 4.28151 0.663338 0.5602822 3.071746161 4.707661 3.872777 0.784399409  
0.8853317 1.662196 2.462235 1.735604 1.678578 4.753978359 4.320563 0.4750403  
4.741228 0 2.670438 0.664848849 0.8516367 0.7601998 0.8275693  
3.719506233 0.467232848 3.886574 0.8783463 1.362148 2.869638469 2.333143  
3.271272 1.456202706 4.12386 2.763458 0.1777914 0.9065085 0.6069542  
1.363015 4.913727086 1.19001 0.214077523 0.5614246 6.760096 3.404372  
0.6354342 4.231049 1.464357 1.853414 1.676811671 3.326237 3.756902 0.165239042  
1.456376 0.272461 1.408584 1.686118 1.500693 0.06521419 2.543115 6.081588  
5.419930521 0.6044614 1.087958144 4.124866 2.646262 1.121931 2.22477685  
2.636121339 0.9750533 4.28044 3.935296 0.5088893 0.9706185 0.477794639  
0.5648805 2.762251 0.6916906 1.136350413 0.8457301 0.3029416  
0.757790409 0.2549352 1.067062384 0.559261 4.051065 1.675132082 2.216724  
3.048362 4.33809668 3.96208492 0.5235811 0.9150085 4.021387 2.447208  
2.702927 5.444169 1.83632 1.834436 1.075097 4.20777955 0.2572334 0.53632761  
1.779824 0.673313563 2.910611 0.5051809 2.051592822 1.995993 0.449007  
0.8099603 0.794285189 0.2897752 0.4679961 0.396868079 3.835791206  
1.455552 1.214321 0.9465012 2.77689713 2.768381101 4.908532267 0.6165534  
0.6767422 0 0.4944124 0.8400252 0.7110668 0.9250337 0.4479845  
2.893324 0.6522589 0.6889843 1.012340617 1.667833 2.182106 2.756254 1.38455  
3.788542 1.367349 0.9135455 0.5870378 2.30997 1.242448 2.95180144

7.416468 0.8442395 4.210834 1.087837 3.750487493 2.517588 6.567635 4.279485  
0.3527303 4.83643 0.4617201 0.742491 0.967110546 0.4330191 0.6813386  
0.970500708 1.71627 3.860778 4.729372 0.680636 1.732178 0.430969775 1.389027803  
1.135733 3.683779 2.115365 0.41407755 5.49138173 2.115913281 1.904453  
1.182434 2.228672 2.697249 3.452386 0.6611612 0.5388095 5.609280349  
4.29807711 0.8247147 3.340523304 5.303834 0.85835432 3.099807 1.330121  
1.707947 5.945394 1.772235 1.084694 1.498204 0.7783782 0.6913109 2.593421693  
6.115551 0.2965289 0.7342406 1.439485 3.087917912 1.480119 0.9558863  
2.389111 2.976436696 1.838686 0.8759494 0.651901 0.1980581 3.087305  
0.9471605 2.025743 3.920735652 4.193920486 5.261993412 0.4683303  
0.949473531 0.533918337 4.117309 0.109267 2.414225113 1.375793 0.7770436  
0.7457329 3.859121692 0.6912349 0.3817776 0.4133876 0.748440749  
0.6830211 1.632659 0.8246538 1.301203 0.9883834 1.762066 1.189532  
0.411708 8.09971 2.629872 2.775431 0.527658098 1.261169 3.198421 1.741603  
1.657499 0.4413773 0.9514705 0.5877477 0.364915462 0.450624796  
0.851306302 0.8818539 2.271068 0.8775444 3.541655 2.968355 2.461754187  
0.8194225 5.760232 0.7147024 0.5755854 0.5696404 0.685812817 1.38125  
9.937039 1.984888 2.838038 3.152988 4.818428 8.562908 2.893613722 1.193927  
3.823878 0.901538626 0.4739252 2.40343 2.461609 1.703528 1.40359 3.701647663  
3.084910443 1.179849383 0.2157445 3.446092 1.189298 0.8125244 2.13771  
0.498455 1.29544633 1.052167 0.318603213 0.02947943 3.53943 1.659627  
2.277579 0.5391025 2.194149233 2.779511 0.9463268 0.7533943 2.681707  
1.636475 2.165617 3.230659 2.702585945 3.649211 1.451613573 0.326854 0.1054416  
2.361704035 7.172875 1.270703 1.150919 3.941429247 0.4245601 4.416405 4.37621  
1.692426741 0.8739992 0.3816199 0.3604141 0.07476034 2.775736  
3.016661 0.8818027  
AC069224.1 3.714766 0.949400024 0.2380835 0.987484843 0.34096887 0.673542831  
0.3008661 0.407128351 0.4467962 0.4077618 0.194113251 0.1925725  
0.5370916 0.4542914 0.7710072 0.5730452 0.7606026 0.166420119  
0.2478603 0.1438395 0.446637557 0.3613842 0.669943215 0.8706603  
0.2667205 0.612502058 0.7401263 0.148287 0.2276805 0.6638571  
1.081835 0.292518412 0.550965 0.441215217 0.7568187 0.671028984 0.573718032  
0.658846511 0.4959136 0.8249544 0.393786875 1.024248 0.382332422  
1.814052 0.543760186 1.143598 0.4375514 0.8605638 0.584039538 0.2835414  
0.5611208 0.2297902 0.518007381 1.522882 0.382299045 1.183932 0.7189365  
0.9235435 0.2081033 0.6813412 0.5308827 1.579026 0.973156347  
0.4547951 0.2919802 0.6252837 0.7043665 0.6174432 1.013215  
0.05704539 0.5486538 0.461002558 0.3533183 0.2454956 0.632276658  
0.5332086 0.12409159 0.7875093 0.386281 0.9364725 0.2944288  
0.278553 0.8742728 0.421121532 1.340503701 0.1550678 0.2984523  
0.6515933 0.232547109 0.751896 0.3114483 0.4966761 0.851217915  
0.6969153 0.5824248 0.28877773 0.6961862 0.492780797 0.315030106  
0.4712966 0.22310953 0.1529673 1.258907 0.249564792 0.4145619  
0.3774982 0.192927604 1.125646 1.557646259 0.391659924 0.3945996



0.544336352 0.4835156 0.5973896 0.4093657 0.3158029 0.590268  
0.828090614 0.9621454 0.7806801 0.3474274 0.5803015 0.4064188  
0.2095504 0.7239925 4.36045 0.2126843 1.252027 1.014179 1.678143134  
0.291802379 0.350869 0.538227551 0.310426033 0.6483015 0.86340975  
0.2367579 0.279682 0.115801135 1.059407668 0.172948841 0.264768233  
1.992848 0.4074971 1.495787 0.4658516 1.138165 0.1923978 0.630001614  
0.368006 0.7407737 0.217235801 1.02807 0.7742913 0.181882817 0.4616281  
0.427689 0.161357163 0.7625986 2.4779 0.412831618 0.529876 0.9974284  
0.679478 0.565039381 1.04897 0.4012661 0.394325844 0.6791889 0.330455465  
0.1897046 0.2519386 0.605958941 0.516893 1.524655623 1.245796 0.8568556  
0.4587483 0.7438152 0.2356994 0.530871686 0.3446909 0.2147966  
1.190341 0.6065313 1.882862 0.08810786 1.102263 0.7701345 0.788025083  
1.32668592 0.3597301 0.6733805 0.4720476 0.6491883 0.59922372  
0.4213987 0.713986539 1.039707 0.7420404 0.345595499 0.741094941  
0.2109315 0.5257101 0.454685445 0.1586781 0.744203 0.1371326  
0.3190387 0.202012 1.885015 0.3636101 0.719728 0.05638664 0.3233311  
1.106145 0.8526483 0.3611467 1.306257504 0.8338703 0.26277 0.202652639  
0.3109517 5.154201 0.88482 1.01275 0.8111181 1.189326964 0.4680983  
0.354549 1.040074 1.518492 1.245685 0.426743797 0.5500591 0.8794382  
1.012278 0.752987561 0.348721893 1.285411 0.4556933 0.2248353 0.808413558  
0.6879424 0.5646043 0.386843196 1.199306 1.131061 0.1800869 0.2475285  
0.5001916 0.266434 0.582966324 0.7670565 0.532593255 0.9058279  
2.098222 0.4976967 0.9421109 0.733646 0.4386106 0.4732363 0.32110802  
1.094008 1.090439 0.422835765 0.2070428 0.3486048 0.576196 0.2469842  
0.5600252 0.7544313 0.8399499 0.9863656 1.11302729 0.7196808  
0.397363535 1.494035 0.9115627 0.3872788 0.608197184 0.352203952  
5.488347 0.7681987 0.6493657 0.1627767 0.3350473 0.267453559  
0.555109 2.130343 0.2212488 0.226165758 0.417967 0.2672117 0.416330591  
0.4661673 0.539502246 0.1605414 1.33336 0.870705889 1.201664 0.3218157  
0.40472039 0.530765955 0.4618282 0.7245634 0.6213058 0.2468226  
0.2101401 0.4190834 1.181282 1.394813 0.5592516 0.749667787 0.7786164  
0.482168899 1.250893 0.29958603 0.3821729 0.6846337 0.374297725  
0.5513902 0.2562674 0.08463259 0.296409633 0.1297652 0.2037534  
0.217797608 0.653479957 1.675571 0.3281487 0.4474035 0.391247242  
0.582574335 0.742279999 1.840672 0.8265115 0.376309 0.1054307 0.4323845  
0.4876783 0.4422902 0.6129856 0.7090727 0.06845866 0.5142274  
0.544007646 0.3230168 0.4166255 0.6411883 0.5636544 0.9921402  
0.5669602 0.6524407 0.4644274 0.6424562 0.4425787 1.231729708  
0.7362253 0.4868978 0.6401959 0.3684839 0.382702805 0.1281147  
0.9825663 1.064673 0.2193852 0.7274644 0.4116144 0.3581781  
1.111975187 0.205664 0.5008161 0.173211433 0.761318 1.440757 0.5273167  
0.2452397 1.032771 1.060005172 0.236442357 0.5274333 0.6563906  
1.139596 0.309049134 1.737417771 0.307814829 0.104236 0.5914738 0.3522456  
0.3669726 0.4575463 0.345423 0.4725187 0.613176919 1.570876068

0.5001185 0.683237778 2.154652 0.202306619 1.052565 0.4454617 0.8774156  
1.64942 0.7328569 3.564707 0.6473748 0.1716434 0.1719879 0.467592394  
1.18274 0.7192771 0.3014026 0.2387484 1.272936532 0.7708586  
0.3312359 0.7288692 0.460751501 0.5042841 0.3604116 0.3108514  
0.3589957 0.6018505 0.6248655 0.6498625 1.209675792 1.312041604  
1.049078282 0.4507239 0.65653872 0.528003207 0.35934 1.291241 0.427167608  
0.3208847 0.1018833 0.3879208 0.37420927 0.9606547 0.2978938  
0.3856677 0.303588591 0.7525275 0.5235933 0.3077425 0.2648619  
0.6915802 0.3573718 0.4600489 0.1075482 0.5616377 0.5503234  
0.4418146 0.275674435 2.79298 0.07957198 0.4363801 0.7233793  
0.4000154 0.3712072 0.2271678 0.774066495 0.566444427 0.368928754  
0.3761009 0.899667 1.203489 0.7361183 0.5921796 0.465006874 0.3901463  
0.9332371 0.2467078 0.1487047 0.2568641 0.421938892 1.106954  
0.9621491 1.00173 0.5533999 1.32816 0.9395638 2.296757 0.383940454  
0.4990129 0.325453 0.247378117 0.4519715 0.3940954 0.7275455  
0.8944419 0.632159 0.675337857 0.920976179 0.213045313 1.429071 0.5878881  
0.3535514 0.2798918 0.4917612 0.3315872 0.241715933 0.5683025  
0.052842515 0.1210118 0.8354012 3.861742 1.167747 0.05960922 0.225468836  
0.6915012 0.6154868 0.5623001 0.631106 0.1401598 0.4848962  
0.6912167 0.52028125 0.4416664 0.344059068 0.2265244 0.1836261  
0.424346778 2.163257 1.20705 0.5126262 0.693511501 0.4149525 0.878989  
0.8610916 0.230575423 0.2231602 0.5039197 0.4826125 0.2696894  
0.9917648 0.2462581 0.3137637  
AC008115.3 0.5471064 1.05921223 0.5652423 0.875921195 0.450635962  
1.287186321 1.284481 1.538005944 0.1163108 0.1377072 0.490881414  
3.086315 0.6969322 1.912759 0.6594756 1.553187 0.8990335 0.433227846  
0.8889896 1.123337 0.697616949 1.071021 0.777329377 2.484453 0.436437  
1.067928357 0.9838519 0.5095509 0.1855415 0.3344835 1.023152  
0.656784424 1.601615 1.862561161 1.167505 2.274601795 0.980117966 2.183641959  
1.221457 1.588178 1.390588166 2.467494 0.358306068 0.5107458 1.581484543  
1.37124 1.234574 0.1920202 0.53660549 0.2310637 1.277086 1.601319  
1.170600719 1.145269 0.64830676 2.465627 0.4083378 1.501389 0.2914178  
0.2606223 0.6275043 1.136174 0.644849696 1.046844 0.617878 1.519233  
0.2340791 2.073468 2.417017 0.6058865 0.6485097 2.292003151 0.3194972  
0.03485883 1.121028103 1.216501 0.319237016 1.52694 0.4826753 0.2437842  
0.8686573 0.8701609 1.52041 0.4171178 1.554141523 0.2608363  
0.4535629 0.5699364 1.365716555 0.4697638 0.7733477 0.2955328  
2.009775006 1.024502 1.113373 0.465600853 2.024804 0.513126331 0.506965985  
0.5889061 0.53856254 0.6248789 1.001039 0.179909045 1.35134 1.146495  
1.996374609 1.604783 4.341854376 2.473014502 0.465677 3.606087302 1.124793  
0.5116897 0.1420891 1.132677 1.901538 2.829356733 1.105003 1.8711  
0.5805173 0.1082258 0.4062708 1.697127 1.307944 2.153067 2.780622  
1.092077 1.915628 1.941587718 0.954957389 1.011753 0.328067972 1.545503928  
0.3682189 2.260865212 1.378344 0.09707643 0.657721298 0.620520543

0.585290589 3.137273235 0.8105966 1.420984 2.010015 1.538413 1.290038  
0.7591881 1.384915508 0.8758857 1.677704 1.314815727 1.605775 1.165412  
0.4599526 6.128765 0.5969546 0.5712651 0.8099659 0.9370218  
1.083288213 2.188309 1.975891 0.4043038 2.719997569 0.9620068 1.2535  
0.335950732 0.5728568 1.400974671 0.2633826 0.3372949 0.673755403  
0.9149979 2.944945507 1.617895 3.841558 0.3090927 0.2161466 0.7362923  
0.542159311 0.3888324 0.4224783 3.42996 1.7763 0.8217222 0.1501291  
1.583926 1.387958 1.494592199 0.180190572 6.231687 0.7443322 1.585207  
0.4882161 2.119974013 0.5095707 1.967995684 2.480214 0.9175541  
0.501239373 0.684741382 0.5930286 0.1970695 0.980734695 1.239221  
0.878883 2.264311 1.233926 1.329728 1.318327 1.729617 0.4408491 0.4403602  
2.229057 2.457204 0.5728076 0.3859537 2.303993957 1.517415 0.547238  
0.773738523 0.1517766 0.8989398 1.452901 1.103613 0.75262 0.557293919  
1.299799 0.9817028 1.493815 0 0.7782698 0.186012355 0.2291078  
0.5760348 1.286325 1.672066328 0.453899549 4.208702 0.1748186 2.901029  
0.852723028 1.410305 1.644574 0.575449805 1.127256 2.771198 0.5921752  
1.572264 0.471707 1.437614 1.754884054 1.071975 0.54071797 0.6929831 2.84157  
1.59565 0.5805966 0.4483974 0.5166173 0.5685864 2.649204903  
2.793173 1.216564 0.192628391 1.131853 0.3629978 0.6315637 1.065466  
0.9261748 1.5965 0.749682 1.336126 1.570232401 0.2348848 0.701609251  
1.838577 1.713831 0.7847385 2.261814055 0.189695929 4.262528 0.3047297  
2.34061 0 0.9052034 0.596777066 0.7463145 6.010873 0.9215342  
2.428629906 0.5062806 0.353156 0.932476358 0.2971922 0.642030602  
0.3259809 3.314587 2.092280509 0.9520585 2.150891 0 1.4211766  
0.2219519 0.7284621 1.164524 1.927599 1.339155 2.845997 1.671786 1.523684  
0.4937243 2.120331243 0.3331904 0.170516478 0.3458067 0.603784055  
2.230624 0.3099567 0.6112011 0.634593 0.3694818 0.3399178 0.481490184  
1.114763 0.606188 0.43543653 2.381611076 0.3163559 0.6101732 1.103389  
0.891877298 2.741954904 1.308988687 0.4791672 0.6813367 0.7993654  
0.9057151 0.4052128 0.4928775 0.5054829 0.8994143 1.359232  
0.2613788 0.6218226 0.755290923 0.6152803 0.2662119 0.7719832  
0.6162725 9.762822 3.099434 0.9548017 0.3284845 1.295622 1.020457  
2.721581457 2.597997 0.3578826 1.012928 0.916972 3.48405942 0.08893615  
2.621062 3.040813 0.3563711 1.409524 0.3887382 0.6966729 2.254829689  
0.550685 0.4573096 0.172164535 0.5285004 3.41184 2.117911 1.258585  
1.322988 0.981974517 0.596572194 2.912772 2.12785 1.483308 0.160904452  
1.287280425 0.877956053 1.243272 0.6452224 1.528287 0.1310139 0.6394288  
0.4007913 0.3140602 2.113632896 1.291368256 0.721062 1.385448925  
9.470127 0.473983403 2.60441 1.232525 0.9825957 2.279894 1.861255 0.9993533  
1.838463 0.08249081 0.5372665 1.664511662 3.538601 2.004946 0.5991617  
1.193307 2.092882899 0.7015595 0.4377726 1.362066 0.385533189 1.007168  
0.99496 0.2110993 0.4287908 0.7520391 0.6703816 0.1657209  
1.115663344 1.229590902 2.016723278 0.3160814 0.423209031 0.778023078  
2.206349 2.207897 3.129803801 0.783694 0.3182692 0.2634371 2.621344511

0.3612257 0.3236796 0.3614317 0.606955989 0.37916 0.4758205  
0.4676814 1.930581 1.0802 0.9824145 1.008512 0.7199265 0.733691  
0.601697 1.606425 0.461340414 0.4338339 0.3314291 1.189167 0.851495  
0.4165309 0.2520869 0.1712926 0.201506381 0.387076807 0.25610719  
0.2349775 1.384852 0.5115013 1.149766 1.066405 2.125781123 0.5599722  
1.146468 0.4999011 0.929066 0.470377 0.713058962 0.7655049 0.5948624  
1.652782 0.9835962 0.9745947 3.213392 1.130803 1.049454724 0.3897118  
1.133978 0.680041994 0.5524811 1.188648 2.433451 2.216817 1.297711 1.406441317  
2.089251517 0.532419253 0.4086962 3.443402 0.7754618 0.704332 1.263093  
0.5810768 1.116215734 0.7423975 0 0.6529505 0.811116 0.4931639  
0.8542501 0.186211 1.445737041 0.6480462 0.5358332 2.321152 1.182893  
0.5003883 0.6311452 0.7030166 1.225216053 0.3161823 0.823245624  
0.2993823 0 0.81575421 3.481248 0.7743313 0.5193643 1.833136398  
0.7777525 2.642871 2.318906 0.657652164 1.47468 0.4790968 0.4695849  
0.4938631 0.7917458 2.417725 0.5020303  
PLBD1-AS1 5.251816 1.853799123 1.096143 2.104817928 0.264154058 1.50490156  
0.3751571 1.96161264 1.339233 0.6976625 0.319179506 0.5782232  
0.4042051 1.364067 4.199467 0.3152399 0.8281366 1.383421537 1.083041  
0.8278014 2.03956773 0.6399317 0.440633792 1.132221 0.5847564  
0.573832309 1.925816 2.986889 0.3703047 0.523781 8.139491 1.841277022  
1.849646 0.343136268 1.478725 2.033604457 0.515901019 0.994160992 0.9330384  
1.214513 1.84749186 1.098989 1.512730945 8.378826 1.537701834 0.3656357  
1.177832 0.7664697 0.889720713 2.87337 1.176377 0.6103617 1.490574929 0  
1.194363795 0.7807216 0.6448058 0.7321717 3.26254 1.920559 2.807525  
0.8678926 0.127285169 1.170925 0.9485879 2.399019 2.71681 0.6662637  
3.49865 0.361128 3.114852 1.02760342 2.648717 0.8669673 0.835934427  
2.223897 2.289484929 2.213978 0.9880266 1.482093 2.447536 0.6327954  
1.089287 0.650225709 0.23859723 1.132687 0.5106387 2.874955 1.070653132  
0.5090808 2.343901 1.361137 2.677244423 3.027739 1.075601 0.080415751  
2.694076 0 1.538310526 0.8136983 0.700365183 1.828381 0.9220977 0  
1.711565 2.142341 1.040910783 1.608663 1.448080279 1.726480346 2.170003  
1.431307937 0.5920529 0.4713383 0.2181401 1.110668 0.8492531  
3.499803057 1.140007 2.51754 0.8137321 0.5981471 3.274535 0.8486451  
0.3514001 14.1258 5.462691 1.052745 1.153753 0.491830882 1.839268907  
0.1812159 0.037774605 0.97699888 0.9206356 1.351847258 0.6812749  
2.324948 0.363512408 0.266740542 1.783293099 1.550021619 5.555253 0.8998868  
3.486604 0.6893978 0.2898309 1.398639 0.939991222 2.269165 3.597056  
2.109711358 1.06195 1.276057 0.847362339 0.6641713 1.649638 0.433354082  
0.6144293 0.7130197 1.924446451 1.343827 1.260051 2.211249 2.878660857  
0.4430719 0.5033089 0.851009425 1.602589 1.392376319 0.485225 2.451047  
1.861871054 0.6693157 1.038197605 0.6041794 0.1598085 0.9576877  
1.045283 0.8138748 0.235014182 1.901053 0.9614592 0.1771669 1.563502  
7.728571 1.751675 0.8880987 1.250094 1.295745941 2.556106058 0.282308  
2.355007 0.1358325 0.2075611 1.848922787 0.3129243 0.866116221

1.659074 0.3558723 1.331861847 1.621911394 0.3641753 0.9681535  
0.654182498 0.7827411 1.22742 1.155618 1.355201 0.7058557 1.187379  
1.165191 0.6091263 0.4259155 0.9624731 0.2121967 0.3693455  
0.1914326 2.914970604 1.654008 0.3360555 1.328255065 0.5033074  
7.378847 1.338326 1.524875 0.9012498 0.399269301 1.227231 2.550552 2.064021  
4.660787 1.274482 0.314129926 0.492428 0.7346898 1.357683 0.522104661  
1.421558554 2.333996 2.093423 0.6188384 1.722009661 0.3711686 0.5049614  
1.325175936 1.068901 0.7977076 1.745526 1.994348 1.656564 0.4878799  
1.982494538 0.9003126 1.264350473 0.9752342 0.9422953 0.5276271  
1.290924 0.2753581 1.510393 0.4539151 0.900301569 0.6053896 0.2689504  
1.01393084 0.8440061 3.218331 1.599838 1.74291 0.2211838 3.711519  
1.349736 0.6279388 0.275505781 0.8654481 1.068849354 2.084417 2.744474  
0.4216653 1.7500976 0.629052072 5.93321 1.578932 3.162179 0.07806547  
0.807763 2.6752835 2.446552 2.900261 1.909941 0.406747352 0.6627162  
3.134771 2.011732927 1.259277 3.400553864 0.8777251 0.2431753 1.252735402  
0.9521498 1.076779 0 1.963655923 1.073357 0.9106649 1.870332 1.882126  
0.7498053 0.3145877 0.5821763 1.502021 0.3498382 0.437266548  
1.780109 1.649231944 3.344635 2.30810638 0.3183368 0.9421954 0.685394172  
1.308278 1.985345 1.217658 0.511754216 0.6534527 1.368042 0.827265479  
1.208828276 4.874467 0.5845378 3.438743 0.608551624 1.341093938 0.378954108  
1.677246 1.651598 0.303194 1.744427 0.6220969 2.290685 1.241656 1.844052  
2.179485 2.188788 1.718359 2.130671258 1.450905 0.05449304 2.24863 0.8379946  
3.854115 3.833878 2.232594 0.9077417 3.53355 2.880598 2.247619401 1.530028  
0.7417358 1.124444 2.605867 0.692204068 0.08192273 0.6035918 3.523155  
1.388826 0.6889313 2.699392 1.244575 1.178846884 0.8031593 1.197227  
1.90305362 1.703882 1.738562 0.2786993 1.058522 1.582117 1.640787918  
0.444855248 2.655972 3.670638 3.859898 2.519666524 1.121671203 1.15531609  
0.3817428 1.161666 2.083496 0.06034114 1.247303 1.817528 1.272892 0.973476896  
0.761300588 0.6272998 1.069243391 3.965146 2.037492415 1.799271 1.098706  
1.572032 0.4620228 1.93736 6.36867 1.439461 0.227957 3.817786 0.469362195  
0.5272801 0.7960507 1.419203 1.477056 2.236294539 1.309936 2.712774  
1.161024 0.307779683 0.2378829 1.471221 0.700028 0.4557425 2.944119  
0.8899494 0.4197937 0.596719266 0.323607577 1.393264781 0.4499677  
0.509784446 2.207340239 0.7487637 1.408005 0.737509176 1.880278 1.195235  
0.2911953 0.97890314 1.535722 2.608852 1.498183 0.139773002 1.920929 0.98617  
1.005201 1.460777 1.525693 3.249565 1.718615 1.016836 0.3232244 1.900278  
1.313012 1.671507533 3.907417 0.1526465 0.5610534 1.71953 3.272596  
0.7430642 0.4057319 1.505550193 1.884633553 0.825687862 3.24671 1.76339  
1.20147 0.5295482 1.563677 2.415044293 0.3641035 0.9353659 1.592491  
2.139502 2.166418 1.253943986 0.6808228 0.2307167 1.502146 1.619873  
5.258186 0.7225166 0.8620377 2.485788969 1.538484 0.5402865 0.569467747  
1.979106 0.5474561 1.268803 2.722667 1.66313 1.531081708 1.545905904  
0.163477724 3.880504 1.755095 2.18622 1.610787 1.257823 1.83848 1.391083307  
1.783964 0.114041418 1.86769 1.26691 13.24382 1.042091 1.243567 1.502461881

0.5471967 0.8419858 1.878068 1.063668 0.115232 0.5813737 4.186125  
0.598847211 0.9002226 2.190717383 0.4763357 0.1509678 1.385439106  
0.7859608 1.147431 0.9169482 2.565759833 0.4776131 1.770514 1.08226  
0.490401698 3.482413 0.8826314 2.481493 4.013978 2.092801 2.783832 5.747477  
SNHG20 1.120487 2.387202112 1.849064 3.131484839 2.423643133 2.68046056  
2.112705 1.510250199 1.157084 1.363877 1.718464646 3.278947 2.931452 4.508612  
2.27185 5.390731 1.803453 1.82055735 1.459248 1.88749 2.675612071 2.53308  
3.400638633 3.14042 2.29139 2.499296572 3.06186 1.052158 1.257761 2.903473  
1.828805 2.001125446 3.030484 5.135686842 2.261244 5.532385476 3.323276188  
3.548738164 3.519762 4.748561 2.217748663 4.664504 1.372175491 1.772891  
2.145165265 4.002825 2.84919 4.04591 2.0880631 1.986755 3.946112 3.888984  
6.813847579 2.443099 2.060712011 7.760142 1.324975 3.897958 1.756422 1.797316  
1.24693 4.820745 2.757437099 1.909054 1.321052 1.961653 0.9479528 2.75087  
4.833315 1.091912 2.585496 5.22846346 1.76437 1.534437 1.691865926 2.820778  
4.866133953 2.504335 1.695014 1.725551 1.250577 1.145066 4.139518 1.531020111  
3.68660014 2.02077 1.339887 2.494445 1.893043848 2.306244 1.001484 1.812579  
3.827239523 3.092913 2.218559 0.871041685 2.323957 3.73440112 1.906043283  
1.477601 1.271798481 1.139084 1.586316 1.03479436 3.588874 0.9055242  
0.888724597 3.423976 4.264005717 1.659234854 1.176852 4.506523109 2.020081  
5.941001 2.960493 2.68916 2.029165 3.081582491 6.008099 6.492811 1.177686  
2.601115 2.105779 2.347877 2.370123 1.733028 1.369137 4.319744 4.008599 6.683439351  
4.390839672 1.781439 4.216799273 2.406427115 1.319834 3.331305243 2.776149  
0.6438241 0.706428112 3.685629329 0.638146369 2.480749096 1.895392  
1.793092 3.589681 2.269495 8.919505 3.481083 3.69622499 2.467537 3.891141  
2.867679782 3.18259 2.191372 1.014705451 3.124003 2.402478 1.893367785  
3.246572 3.51491 1.693946901 2.86509 4.495988 3.461495 2.537267395 4.059942  
2.642851 1.217552039 1.404644 2.810805644 2.788293 1.544114 2.169254085 2.0944  
6.56163915 3.071975 5.995959 1.746494 1.807749 0.7830391 2.33035631  
2.232961 0.9014029 8.223582 4.997225 1.073709 1.035328 3.358792 3.035791  
4.174431032 0.577430455 5.432241 2.438815 3.193588 2.400333 3.168850924 2.14586  
4.68178473 3.207682 2.295821 1.636119805 3.123218823 1.438637 0.9079544  
4.275375058 1.390215 2.785478 1.939559 3.973403 1.488122 2.604942 2.236333 1.77755  
0.3101446 4.501254 7.591669 1.205238 1.667549 2.653990149 4.003216 5.042557  
1.560516315 1.117062 1.319002 3.806082 2.707498 1.59904 4.699106613 4.840419  
1.258722 4.175483 0.6751358 2.238212 1.866864862 2.406955 2.270359 1.335341  
3.747465646 1.454545707 3.485935 1.121311 3.650854 2.529327043 2.240781  
4.477802 2.502652981 3.099804 2.921523 1.105229 4.093534 2.309982 2.104952  
4.745622588 3.563993 0.974036711 2.047167 5.643698 3.522719 1.603925 3.456312  
1.700614 2.035641 3.197269613 5.72231 5.774988 1.647393726 2.794809 1.997332  
1.740315 1.516983 2.397816 4.464181 3.011996 4.834783 3.686369845 1.837441  
2.309162318 3.685501 3.305451 2.371959 2.888622358 1.850393141 1.601114 2.95103  
3.428851 1.507129 2.689591 1.25392087 2.867762 4.926418 1.140881 2.557942517  
1.628034 0.6783462 1.486308321 1.339595 2.670691841 1.015484 5.045936  
3.22347418 3.165872 2.959755 4.2295747 4.386025378 1.055161 1.516258

5.099784 3.991355 2.283936 3.69316 5.37384 2.96522 0.9830028 3.660922315  
2.235186 2.166702248 1.156866 1.451144048 4.779452 1.604518 1.862239767  
2.809352 0.8565746 0.8246113 0.847780984 0.9219274 1.179413 0.915238916  
2.978175173 1.012767 1.267744 1.580133 2.407897081 2.435302719 4.747875773  
1.493333 1.786861 0.4553605 0.721254 1.985842 1.597598 1.068031 1.598964  
2.783273 0.9162585 1.295597 1.861823615 2.816713 1.244741 3.732468 2.562898  
10.61404 3.492678 1.78785 1.02662 2.795661 1.240346 3.310341437 6.006721  
1.535966 5.039551 1.779444 2.568085567 1.479811 8.07021 2.873643 0.8253754  
5.546089 1.974428 1.405086 2.655727173 1.438263 2.093533 2.316838012 2.007338  
3.09316 3.291079 1.040578 2.157799 2.702074186 1.965769065 2.388188 3.978206  
1.648652 1.119080657 3.044556678 1.744608813 1.980599 2.081076 1.668372  
1.701279 4.218703 1.21596 1.592581 3.000513056 2.910424314 2.292344 5.017295573  
8.626627 1.353847399 3.135472 1.953145 2.226365 4.969716 2.785614 1.511824  
2.837825 2.498218 0.6824634 2.18313132 3.381001 0.9312415 1.919042  
1.076818 3.9872037 2.17674 1.436501 2.169163 1.986695304 1.955248 1.286241  
2.230151 2.212704 3.10229 2.579457 4.070499 3.212740613 3.989776289 5.23762698  
1.08778 1.765462613 1.095919614 3.598567 0.9718855 3.118505376 2.547973  
2.086378 1.744059 3.960612384 1.487322 1.104214 1.081861 1.162204895 1.121574  
1.073429 0.928688 2.731547 1.673722 2.350929 1.704702 0.9971837 4.656248  
6.240573 3.262738 1.09931591 1.188243 2.181062 2.282772 3.35028 0.9836246  
1.460301 1.744985 1.679392181 1.144018929 1.082254117 1.354983 4.554015  
1.904817 5.88929 3.510088 2.913267809 1.51375 6.096281 1.984113 1.326854  
1.797711 1.301169403 2.677125 4.569973 1.936204 2.534815 2.152369 3.871471 5.54749  
2.210786052 1.970325 2.616294 2.040988476 0.9619692 1.958361 4.462539  
2.333816 1.738539 3.748343668 3.895737113 2.179580644 1.217801 4.361282  
1.986021 1.081923 2.061692 1.12544 4.387400014 2.347226 0.915549963 0.8592336  
3.371718 0.955169 2.426911 1.508201 4.451489049 4.526139 1.986827 2.413513  
2.048058 1.216958 3.422758 3.373093 2.060433892 4.215859 2.762150128 0.5367199  
0.8080021 3.676118318 11.79044 2.922416 1.249772 2.414475331 1.846646  
3.976558 3.51138 1.582541433 1.41157 2.072764 0.4177611 0.5575455 2.5578  
2.14301 1.014434  
Z98884.2 0.8447288 1.183730309 1.038965 1.170414448 0.801200094 0.587850359  
1.400469 1.322161305 0.16248 0.3366468 0.48404831 1.790334 1.045694  
2.585827 0.8010889 1.434221 0.49339 0.847274611 1.12169 0.5380258  
0.762678469 1.091792 1.837655943 1.315193 1.108508 0.683759473 1.20259  
0.1941315 0.6479789 1.635395 0.5630532 0.757928789 1.101988 1.300949208  
1.834809 2.211787242 1.44741085 1.262247366 2.49704 1.632554 1.232789479  
1.590903 0.33368962 0.6115582 2.127425348 2.066776 1.66304 0.2682419  
1.011972414 0.4841754 1.539156 1.697002 1.539074498 1.169143 0.905649901  
2.475626 0.6519156 2.467483 0.5323551 1.092226 0 2.090425 1.54426383  
0.7311926 0.5343263 1.313797 0.490494 1.212498 2.37155 0.6472402 1.3589  
2.408438088 0.3651713 0.681743 0.59657766 1.516375 0.414102977 1.97505  
0.8241097 1.089771 0.2855219 0.7677273 0.8653056 0.67233609  
2.171052662 0.3643744 0.5280026 1.402777 0.730659466 1.351072 0.4181905

0.5160545 1.295791519 1.282094 0.8345634 0.569117073 0.7333259  
1.553088474 1.041477046 0.7712535 0.265532855 0.3594387 1.398398  
1.089067731 2.634984 0.5948772 0.841910537 1.879152 3.607830692 0.872758513  
0.5739934 1.310572037 1.436594 1.765984 0.7277998 0.4593741 0.7244582  
2.484403535 1.29665 1.644655 0.3525877 0.9827065 0.8158366 0.9821871  
1.674867 0.7979663 1.065626 1.632008 3.190652 1.288339789 1.728168031  
0.7459428 1.374880282 1.227658935 0.881798 1.939311863 0.9392548  
0.4068318 0.689101131 2.369346379 1.037748052 1.035887998 0.7247105  
0.6203245 0.9116504 1.103582 2.944918 1.811765 2.002535522 1.49122  
1.616319 2.6069678 1.552972 1.228693 1.247262572 1.798646 0.7544933  
0.844969573 0.9983638 0.7398523 0.612524469 1.489283 1.804755 0.6353897  
1.616889898 1.343872 1.346978 1.016827979 0.5038614 2.57511415 1.28776  
0.7329512 0.941200296 0.4511305 2.742621007 1.649271 3.392982 0.3925328  
0.6793767 0.4937093 1.024673794 0.8356587 0.3471645 2.686806  
1.985117 1.087486 0.1048612 1.82785 3.016071 2.087865438 0.402746561  
3.282339 0.6781254 1.390468 1.783723 1.638271293 1.067765 2.199347849  
1.031169 0.7420797 1.023375983 1.41204575 0.5983101 0.3670607  
1.181063761 0.6924503 0.7128886 2.051754 1.292797 0.9760059 1.309605  
0.9376229 0.6158427 0.3075798 2.578677 1.555389 0.4400998 0.6221038  
1.396000385 2.932317 1.401514 0.63869672 0.848095 0.9208986 2.128631  
2.261143 1.156507 1.816522926 1.134844 0.8439301 0.8347118 0.1104417  
0.5436007 0.649623302 0.2133676 1.361783 0.5615398 1.781532697  
0.507258733 2.819679 1.221061 1.109128 1.924259892 2.063937 1.065452 0.763678997  
0.9726187 1.742047 0.4963423 1.512254 0.7001338 1.215532 1.850173019  
1.101096 0.464833299 0.2151245 3.65196 2.000418 0.6991917 1.183176  
0.6275537 1.959236 1.041972165 2.570672 2.855118 0.499741485 1.317615  
0.6655536 1.279278 1.334427 0.6229488 1.008912 1.475693 1.904588 1.880169222  
0.6562431 0.716234694 0.6585627 2.320464 0.8221783 2.064293805  
1.112979323 6.616138 1.064228 2.223401 2.604566 0.4741953 1.278287365  
0.7665893 9.596421 0.4425211 1.048642281 0.5583529 0.4933401  
0.342794643 0.4151617 0.560551527 0.2802326 1.843925 1.607542238  
0.949982 0.9144677 5.8871541 1.268391075 0.310055 0.5088113 1.626778  
1.831072 1.760685 1.789067 1.3101 0.9708972 0.9019239 1.54730792  
0.6981738 0.873408831 0.6763028 1.22300839 1.799417 0.4329929  
0.816692873 0.8020647 0.6021708 1.055216 1.034793936 0.4718985  
0.4234061 0.646299162 1.969030999 0.6829863 0.579618 0.6679296  
2.537954483 0.983013894 1.72409655 0.4016226 0.3005656 0.9196112  
0.4313303 1.745354 0.8450061 0.2824531 0.2026506 1.617475 0.5974891  
0.5429081 1.186988693 0.8595137 1.98338 1.690495 0.7789092 8.22618  
0.4948279 0.5643029 0.5735942 1.029167 1.517493 3.190103245 3.51027  
0.1874786 1.30616 1.826051 1.860928909 0.8696734 4.046902 1.194709  
0.421242 3.174559 0.7101377 1.209146 1.489806495 0.4807984 0.638837  
0.618440544 0.3164087 1.72393 1.878482 0.6115393 1.264519 0.89324293  
1.230226847 0.9453202 1.675405 2.123904 0.05619373 2.089872016 0.467221978



0.661632 1.270072 1.152865 0.9150971 1.366144 0.7752241 0.5264704  
1.614720742 3.102832614 1.231126 1.673857831 7.106628 2.059958405 1.409811  
1.166362 0.6863169 2.866401 1.976056 1.082646 1.326921 0.6337939 1.554675  
1.471066312 2.180839 1.835008 0.8369969 0.6251199 1.637241523 0.7681403  
1.389875 1.760738 1.543898556 1.190504 0.5852236 0.2948945 0.8293817  
1.838477 0.9364873 0.5208822 1.809896604 2.494715238 1.702091354  
0.6422529 0.818585173 0.3912684 2.162914 2.135295 1.457389556 0.840179  
0.8550098 0.8096168 1.435060379 1.048042 0.5086835 0.7152762  
0.47693536 0.9004325 0.7477828 0.5807341 1.155822 1.207186 0.935714  
0.9861858 0.5363728 2.272665 1.000641 1.548738 0.386680744 1.447769  
2.314944 1.134479 1.006494 0.513416 0.8803798 0.3760218 0.281493647  
0.463479099 0.894420149 0.4513451 1.593171 0.535905 1.09511 1.672125  
2.276695356 1.012325 1.647313 0.3200703 0.7210309 1.043616 0.482960129  
0.4793725 1.224618 1.077463 1.374031 2.022736 2.120758 1.416257 0.994807545  
0.1944309 1.474858 1.036344357 0.4001857 1.956991 2.276957 2.451613  
1.182282 1.250278506 1.77028182 0.929701558 0.08783489 2.982354 0.5580526  
0.9499861 1.192212 0.8823188 1.238262672 1.03709 0.403546054 0  
1.133086 0.847906 1.677129 0.8128961 1.191056411 0.6035239 0.7925616  
0.9639942 0.8655626 0.3495078 1.528239 1.26267 1.816350827 1.686452  
0.86252261 0.1520804 0.1717115 1.851793193 2.956013 0.5173345  
0.6650639 0.831426492 0.4938539 1.10279 3.628114 0.831209224 0.8989305  
0.6214675 0.6905105 0.6493179 0.2404406 2.494694 1.102058  
AC105206.2 0.5832261 0.564570402 1.078264 1.583313525 0.655072754 0.474980404  
0.5677508 0.977420581 0.3099739 0.5137949 0.461725694 1.449862  
1.238239 2.104813 0.6418822 0.7296426 1.026843 0.831292732 1.039391  
0.923785 0.485004269 0.5554359 1.083616889 1.923629 0.9727962 0.426912137  
0.4457422 0.6913342 0.4944771 0.5705055 0.7932365 0.334851932  
0.8409348 0.833921073 1.08901 1.545196365 0.80600769 1.418087939  
1.175063 0.7985983 0.883734876 1.040596 0.286470919 0.8037339 0.405863185  
1.461768 0.4230257 0.2046972 0.572031872 0.2463184 1.281317 0.9712454  
1.504800205 0.3756552 0.691107594 1.807029 0.6529441 1.098389 0.5257272  
0.6019616 1.576768 1.802005 0.982031853 0.836967 0.9095918 1.465291  
0.4242059 0.9509674 0.8281889 0.9498335 0.8394648 1.751406274  
1.641025 0.5945631 0.6828787 0.5985292 0.170156429 1.024878 0.6574694  
0.207903 0.5991801 0.6346794 1.200583 0.684085653 0.920413912 0.6752802  
0.4566453 0.9258108 1.08416623 0.8837247 0.4520923 1.076399  
0.988827314 0.7508456 2.11322 0.217148553 1.359043 0.091167105 0.572225913  
0.9024414 1.148236251 0.5093959 3.353827 0.12785769 1.800693 0.523794  
0.722776109 1.459152 2.793060992 0.971261597 0.4380183 1.187626384  
0.6851718 0.6738173 0.1009798 0.5063522 0.7985452 0.603229843  
0.5654184 0.963697 0.3497807 0.4037977 0.5142974 0.7495136  
0.4066689 0.4215694 0.786955 1.27247 1.099591 1.138373614 1.087412424  
0.7190324 0.437158536 1.227576735 0.7570193 1.606750811 0.9317772  
0.586417 0.175285919 0.837883467 0.863904645 0.760089588 0.7258539

0.3155825 1.196581 0.3545899 0.6037488 1.213964 0.673421358 1.225496  
0.8325613 2.396316518 0.9656234 1.101708 0.922952287 1.372559 0.9090931  
0.214934008 0.7110677 0.2605783 1.347273982 1.884168 0.6075976  
0.2154979 2.159254422 0.9614231 0.7195219 0.38797417 0.7011471  
1.965087109 1.298566 0.3196115 0.547227689 0.430326 1.627821012 0.8856605  
2.16648 0.1797266 0.1728123 0.1569804 0.747938339 0.8608907  
0.4503701 0.649268 1.514856 0.9681794 0.4801217 0.7708351 0.8548742  
0.624809531 0.268921308 1.089033 0.7589737 0.5894866 0.2402067  
1.178050422 0.7695508 1.165512007 1.038697 0.5662861 0.246614264  
0.903744659 0.5970589 0.1750666 1.009431117 0.3774382 0.3626734  
0.3914269 1.239501 0.9850537 0.8119868 0.7430259 0.6579352  
0.3520744 1.41088 1.473428 0.5495616 0.8228682 1.716312448 0.6739974  
0.4861386 0.374918313 0.2265155 0.5536771 1.624373 0.5490208  
0.4813845 1.155167492 0.6235251 1.019681 0.5175416 0 1.61321  
0.066097594 0.1628222 0.4723572 0.6284885 0.876122034 0.483865733  
1.236092 0.6921943 0.9440427 1.013906148 0.8948887 0.381119 1.073521166  
0.3887777 0.997026 0.3471987 0.7418644 0.7542732 1.129229 0.741236793  
0.6722034 0.576415856 0.6156112 1.575168 2.529683 0.4268464 0.4248891  
0.3831124 0.5657159 0.246766357 1.471273 1.296881 0.264015778 0.6894725  
0.3627775 1.077215 0.9008131 0.3656742 0.3241715 0.7628494  
1.075519 0.597820796 0.143081 1.524624674 0.4522983 1.096186 0.7668343  
0.900158075 0.242663453 2.221481 0.4872717 1.430544 0 0.9348093  
0.424117294 0.6083891 3.814112 0.6139833 0.941442414 0.4828939  
0.4106958 0.601654521 0.4752191 0.941073496 0.2405783 1.282035  
0.780644077 0.4639602 1.146446 0 1.136251389 0.2366051 0.6101501  
1.305067 1.150721 0.7277784 0.970844 0.9345452 2.279687 0.2024307  
1.214497223 0.4972624 0.908869384 0.552955 1.287291054 0.8037934  
0.8921335 0.623223882 0.9664121 0.328229 0.5636695 0.118448743  
0.684207 0.8400706 0.638252719 0.466318222 0.2146083 0.3902739  
0.4900977 0.809905404 1.060549239 0.797375633 1.379164 0.6880909  
0.05012583 0.109717 0.4679618 1.050834 0.898091 0.1855729 2.092954  
0.8105742 0.7181146 0.503221743 0.9444971 0.6621698 1.334512  
0.5318235 3.716913 0.9440162 1.213575 0.5836182 1.895708 0.6667327  
0.933738426 1.67987 0.4768873 1.079801 0.3743655 0.218475 0.09480766  
1.360287 1.671433 0.9643578 1.287926 0.5100338 0.9902225 0.974469824  
0.5381208 0.5388168 0.65546692 1.126783 1.315542 0.9676005 1.02084  
1.014448 0.657295473 0.302836925 1.411396 0.9485739 0.9487409 0.728990897  
1.149736318 0.668513 0.7573438 1.156787 0.9449263 0.2444109 0.9222235  
0.8545027 0.6361091 1.513851086 1.046233964 0.4697404 0.758416045  
3.504167 1.178976194 0.5205659 0.805291 0.9372065 1.117989 0.8134949  
0.5217943 1.012583 0.7914313 0.327278 0.977731578 1.164949 0.3316517  
0.5170575 0.7155499 1.204769057 1.051069 0.1696997 0.9318734  
0.191793404 0.5781248 0.5024116 0.5850935 0.3867764 0.7444248  
1.029922 0.2649925 1.112588544 0.592966375 0.671833179 0.6738979

0.832890545 0.331755083 0.825267 0.7242035 1.060416253 1.185149 0.4958725  
0.1965804 1.170628765 0.08886315 0.3019177 0.3531855 0.202195897  
0.7679646 1.109574 1.274091 1.617029 1.266666 0.7140497 1.075093 0.3069823  
1.190196 1.099578 1.013016 0.327865226 0.5652477 0.3091461 0.8966479  
0.5935029 0.5223883 0.3493484 0.3912884 0.190941969 0.589473418  
0.51190357 0.5009811 1.736799 0.5725338 0.8913984 1.484812 1.699592966  
1.158768 0.7332941 0.7993565 0.2751118 0.5604229 0.345515772  
0.8441825 0.5340083 0.5872993 1.588686 0.7124139 2.022956 0.2909726  
0.679234462 0.5341376 1.333896 0.593131067 0.6107688 0.5430521 1.17469  
0.984654 1.323238 1.192620031 1.606492429 0.567569262 0.2681096 0.8565044  
1.12726 0.5178149 1.164524 0.4578464 0.874932093 0.6193645 0.043992677  
0.03663463 0.4511298 0.4852821 0.295345 0.2977567 1.620218823  
0.5181224 1.041616 0.3009398 1.471151 0.2667118 0.4933962 1.124144  
0.959586688 1.532075 0.463175572 0.8994153 0.1747123 0.815259214  
1.018727 0.323003 0.6459279 0.786739336 0.4271117 1.719682 1.549119  
0.467379985 1.000387 0.4012851 0.1317333 1.021967 1.761426 0.9079272  
0.5606585

MHENCN 2.999865 4.597853839 2.507991 4.672292881 8.283140087 2.799379931  
2.426398 3.284048128 1.235639 1.038219 2.849902408 5.485541 2.299905 4.355876  
4.77548 9.183946 4.775484 2.038929254 1.533096 1.27588 1.517580983 2.539488  
13.647270204 6.829234 6.172976 3.41577085 2.292707 1.682715 4.344937 5.135261  
2.38004 1.976770316 2.883605 8.042497239 2.380594 5.028528688 9.769400552  
5.367309024 3.205782 7.989373 3.464151029 5.965675 1.637203756 5.717674  
4.797433033 5.34224 10.75843 31.89333 1.930875372 1.108586 3.089317 21.83713  
5.002712658 7.185402 3.531374076 6.231595 5.157641 11.07733 1.152322 7.829895  
1.443864 10.76921 12.05962088 2.383124 1.189804 4.536971 1.748755 7.337052  
4.654278 0.683975 1.904932 4.893496237 2.149997 2.269741 4.774716005 3.155541  
2.031741199 3.333469 2.095209 20.81917 2.171356 1.820597 3.222726 1.297499536  
11.421290978 1.915451 3.212312 10.75164 5.397241303 1.969717 1.91501 1.637329  
6.633126047 2.779489 4.038838 3.669876384 1.824683 18.815593032 1.798673766  
2.447021 2.041055919 0.9069624 6.00342 3.288225244 6.772832 3.861646  
1.213399619 3.558523 9.158520219 3.175871255 1.257913 10.58964908 2.180617  
30.90362 11.65397 4.056944 2.468374 6.427135872 8.421864 7.075029 1.453137  
2.243861 1.931783 3.323428 9.879689 1.716628 4.671788 4.038429 12.11962  
15.702863362 4.492396585 2.793058 23.272552184 4.174801422 2.541774 5.192458227  
3.50233 1.286354 2.051129732 14.516927041 1.388610775 5.317021197 3.355688  
2.150768 4.508675 7.97938 11.88256 5.680405 5.911757408 1.98858 4.242686  
3.633733208 7.845211 2.501793 1.984210587 6.195023 1.753494 6.011309755  
4.996306 19.49024 2.54564036 3.691943 4.948266 3.030859 4.502008886 4.677285  
7.313706 2.302583668 1.628697 1.642479175 8.145995 2.517289 3.54037015  
4.260818 9.344656468 13.037 12.28157 2.157019 2.296254 2.361761 4.502824784  
1.74252 2.503875 9.24969 7.034236 1.956389 1.389116 6.18327 6.405399 5.262518732  
0.839809542 25.4869 2.883514 7.655967 4.19562 3.400675502 6.082881 6.054842153  
6.678266 18.70107 1.030638261 2.838251195 3.296825 1.463259 4.079491548

3.009139 4.78018 5.368885 2.634758 2.579688 7.088022 4.387999 1.843146 0.6338217  
8.02085 13.47321 4.613032 1.017423 3.348541915 5.373467 4.532135 2.217681609  
5.471801 2.286517 7.043523 5.647854 3.112239 8.275919056 15.52347 3.260747  
7.090166 7.288116 5.571285 2.6560753 3.585494 12.0569 2.148994 5.904932011  
2.551017465 5.519035 1.489185 8.330123 2.495154547 4.004543 6.550711 4.634310651  
6.839901 6.576536 1.339381 4.699126 1.151773 2.955994 7.080549779 2.614754  
3.249915959 1.913057 14.02267 7.879871 2.662061 9.117413 2.540182 5.196071  
19.179931386 10.11265 6.47048 1.754062379 3.066116 1.041834 3.159947 1.800477  
5.713146 1.58924 2.802693 10.40989 5.509255736 3.77173 1.646083243 6.171497  
3.993803 2.21865 4.960742737 7.983001506 1.038758 4.882095 5.261901 13.65025  
1.958202 2.372356473 1.323931 4.021721 1.42113 13.377062211 1.497585 0.4620969  
3.178746284 1.079576 1.650162924 2.801407 5.106514 5.497133996 5.910098  
3.284916 6.93228933 7.738404171 2.205803 2.763888 6.467117 4.095607 5.849031  
8.075595 5.701206 9.234013 2.030372 7.569970121 1.826932 1.694627247 5.190597  
3.869306022 3.682172 1.805759 5.4822977 7.953294 1.646062 1.320205 3.198559682  
1.667021 1.121788 1.753365914 4.164133101 2.542804 4.784307 2.835959 8.988178333  
4.756502462 10.381561965 2.101875 2.187449 0.1289129 1.171 3.240185  
1.781206 2.471376 1.730044 2.622306 1.221459 1.225305 2.167748597 2.412175 3.91275  
2.63126 3.821615 3.451898 2.670588 1.18298 1.669796 8.845283 3.700128 7.225565029  
14.94578 4.936468 3.791695 1.256973 22.381186288 7.710964 35.40913 5.275512  
1.540681 8.418683 1.51665 1.548241 3.090890136 1.902905 1.468204 1.904863789  
4.708998 5.074939 5.138211 1.781509 2.418045 1.893899636 6.873188364 3.750801  
6.81477 7.230917 0.854691905 6.199899038 9.054831927 4.382383 3.155922  
2.053056 7.093888 2.603781 1.436891 1.786614 8.216673669 13.878291123 3.432021  
4.516908492 4.559626 3.537419208 3.592403 5.286591 1.789998 8.406917 5.472717  
1.775279 6.762376 2.883471 2.551369 6.495832142 13.12533 0.9714005 2.503079  
3.501569 6.082058797 1.936372 3.92788 3.734203 4.192637329 3.734732 2.332949  
2.893721 1.989412 2.871751 2.094666 12.46584 16.551365108 17.015590739  
10.021301906 0.9650331 2.989896822 1.663745529 5.226434 0.349218 5.953197057  
3.197848 0.9732382 1.913915 5.098606618 1.580714 3.244524 2.085001 3.25002768  
7.016589 3.403921 1.727385 4.843883 1.75219 8.11069 3.024118 0.7894925  
17.77525 6.009243 4.993416 2.276637188 3.204738 4.259237 1.769248 3.793458  
2.149553 2.954515 2.11325 5.217531017 1.800248874 1.71145788 1.449468  
6.755845 1.752898 8.453539 3.356206 5.730851134 0.9933677 13.56034 1.741697  
1.87495 3.849755 1.33288856 6.404615 16.43734 3.549458 4.22876 5.820974 7.26631  
7.830624 3.313868066 2.82369 7.128994 2.733018617 1.093926 3.258765 4.468635  
5.032983 6.941516 4.315935982 6.103431398 6.20358163 3.404507 5.223654  
2.109879 1.148599 5.685643 3.636343 2.835173209 1.791981 3.309336741 1.413246  
5.704361 4.342144 4.193426 2.377066 7.495257289 6.033261 1.965902 3.09581  
2.799006 10.71759 7.267389 4.852846 5.775456639 4.432689 1.551679253 4.103892  
5.476117 5.521235308 14.31614 4.961092 1.512867 4.193503474 2.487643 8.704158  
5.149534 3.391359849 1.911209 2.767688 2.439287 2.688012 4.459227 5.197244  
3.653889  
AC005104.1 0.2503608 1.798024743 0.3695142 1.655599622 0.559726569

1.137600754 1.206301 1.138849772 0.07223374 0.1710435 0.179327852  
1.721806 0.6091587 1.992608 2.208069 2.615844 0.5184553 1.040334922  
0.6767662 1.435141 0.226042714 1.617927 2.153821964 3.020927 1.0349  
0.773764833 0.8859676 0.1150734 0.2304577 1.620277 0.6931846  
0.851248433 2.078411 2.776143197 1.196362 2.077382861 2.399990217 2.306980762  
1.92419 2.084305 1.527928713 2.96379 0.44504532 0.4531342 1.054919365  
0.8515958 1.752505 0.2385047 0.666507724 0.1913333 3.079182 4.663789  
1.753330556 0.7659711 0.466197252 2.009772 0.6883277 3.071513 0.194904  
1.186952 0.1670167 2.099621 1.373067161 0.7894469 0.1461819 1.572509  
0.3198198 1.557228 3.145091 0.7525604 0.9205735 4.963100484 0.2525355  
0.17319 1.060882445 0.8368575 0.113290964 1.65073 0.1998407 0.1211199  
0.253869 0.2844239 1.888473 0.836921531 1.983991752 0.5091113 0.2503831  
1.921463 1.010580287 0.5491622 0.2788725 0.1835379 4.109300841  
1.139961 1.146795 0.759037363 0.8848974 1.168465275 0.148163069 0.2285842  
0.275445281 0.2282796 1.598621 0.595897833 3.601726 1.057859 0.514646387  
1.67083 3.068395059 1.422675358 0.1360962 2.949621017 0.5588336  
1.084191 2.294321 0.408448 1.395647 2.05837074 0.4392013 1.854024 0.3134999  
0.06721261 0.6623155 1.596035 0.9815125 0.3820406 1.58934 1.829628  
1.921796 2.049868571 3.396658909 0.4188933 0.560294821 1.731441584  
0.2613474 1.477988809 1.586746 0.1205768 0.204235855 1.490091639  
0.447371435 1.664974523 1.0471 1.139881 1.32936 1.755902 2.266714 1.846656  
1.056249563 0.9179336 3.233552 3.266216444 0.9716809 1.256352 0.436875393  
1.407339 0.4943108 0.876512555 1.006044 0.9108449 0.512583692 2.334742  
2.595807 0.2824753 2.336168125 1.754996 1.756557 0.139092724 0.1054126  
0.961647832 1.88107 0.6516965 0.956410384 0.9359428 3.522385803  
0.6517482 4.925448 0.314115 0.805415 0.548721 1.82215747 0.668716 0.2778101  
3.981579 2.892716 0.5909002 0.09323631 1.283064 2.068748 1.82000514  
0.044762273 2.91846 0.6431452 1.236322 0.8862829 1.988891572 1.054881  
2.227129958 1.320269 0.9597279 0.383126231 2.511013483 0.4092166  
0.8975133 1.176147116 1.143416 0.6338579 1.558254 2.033691 1.287712  
2.401621 1.76355 0.3285423 0.3008297 3.114755 3.910436 0.2845895  
0.3318825 1.448113522 4.743295 1.699285 0.524207054 0.490149 0.4714349  
1.848636 1.553548 0.4362471 1.576687886 1.977709 0.8441687 0.7421759 0  
0.8592662 0.269549578 0.1897137 0.9906676 0.2330009 3.696075753  
0.789292293 2.187036 0.3101984 1.934411 2.199776095 1.668299 1.717048  
0.821968856 0.9059751 2.280361 0.1103295 2.465111 0.4760425 1.362721  
2.632101345 1.135674 0.361639255 0.836832 4.564771 1.829471 0.1989375  
1.423307 0.33479 0.8003947 2.364068849 2.85711 2.417714 0.034180022 1.74058  
0.1690773 0.5883402 1.140859 0.9799572 0.7554223 0.3809316  
3.827188 1.021615328 0.125034 0.703868174 1.405331 1.539226 0.8528705  
2.509692501 0.612606266 5.882675 1.703246 2.015678 0 0.4216261 0.247081908  
0.4634917 5.155091 0.03576939 0.987236558 0.2316786 0.07975428  
0.335271775 0.1107411 0.39872715 0.1557288 2.113144 1.169452262  
0.6419471 1.393869 0 1.225845201 0 0.2585169 2.596163 1.771734 1.66334

3.570309 1.899232 1.460908 0.8962824 1.139926849 0.1655399 0.388291483  
0.6872321 0.374974487 0.8194783 0.1154974 0.726154523 1.576432  
0.1147316 0.516029 0.874073113 0.4615424 0.2258805 0.202817863  
2.052597301 0.2500526 0.6366233 0.7766164 1.805278031 2.863225444  
3.298194573 0.2380659 0.5344899 0.05840453 0.1789728 0.2097114  
0.751329 0.7534212 0.2882957 2.125979 0.4131957 0.45054 0.410433119  
1.40618 0.5510948 2.280546 0.7290101 8.854065 1.099928 0.4105182  
0.5100057 1.199063 1.185717 1.981628939 4.496532 0.2778246 2.451758  
0.387729 1.697053164 0.05523297 4.112301 1.445859 0.3404938 3.823053  
0.1485675 0.3408854 0.946176394 0.2279985 0.1195823 0.336038018  
0.2344431 1.081987 3.131689 0.8156163 1.153164 0.283649379 0.635135361  
2.119578 2.787124 1.312702 0.149892326 1.426052308 1.090492925 0.6985868  
0.5464219 0.9491283 0.4068249 2.803139 0.3446415 0.468106 2.625304208  
1.860622082 0.1990262 1.348766806 5.832728 0.261655996 1.819625 1.18521  
0.4817621 3.851267 3.745165 0.5319764 2.89246 0 0.5243298 1.856493845  
3.231787 0.7299173 0.4607 1.157957 1.767681094 0.8242916 0.8403396  
1.641295 0.89387876 0.8660661 0.2276513 0.2622025 0.3687183  
2.101711 0.587766 0.2572985 2.145669278 2.472693792 2.035259338 0.3569081  
0.768272434 0.038654721 2.259682 0.6328588 1.536907233 1.584624 0.3953163  
0.3926525 2.947930633 0.4141586 0.3015273 0.1496426 0.188472193  
0.188379 0.4432559 0.258177 0.7279456 0.6261253 1.719427 0.8768575  
0.8345936 1.981096 1.245594 2.894605 0.267410439 0.4191111 1.029155  
0.5764065 1.586439 0.4260656 0.8767149 0.2431536 0.139048521  
0.206048966 0.556685482 0.2188959 1.264779 0.06353263 1.103534 1.919264  
2.376353966 0.6546175 2.644583 0.3363305 0.4487683 0.3780419  
0.187870944 0.9508194 1.516623 0.8758997 1.110642 1.245112 5.531244 1.93731  
2.56046262 0.4840538 2.816987 0.767879586 0.1016632 1.634583 1.824932  
2.20851 1.016174 2.580669395 1.74419414 0.551090064 0.1561951 2.338085  
0.4669996 0.4525023 1.017642 0.3765625 1.671872501 0.5211972 0  
0.3841663 0.7008502 0.3769537 1.118402 0.4336672 1.841767341  
0.3353859 0.5480988 1.246729 0.9794993 0.03884519 1.933703 1.871151  
0.86961036 2.677665 0.539672895 0.3042468 0 2.469755853 6.316422  
1.045416 0.5375773 1.715071081 0.1170948 1.577383 3.41792 0.777959574  
0.2997282 0.6375828 0.09209411 0.2525839 0.555842 1.808632 0.8314167  
AC005674.1 0 0.506760361 0.1067486 0.227754445 0.293997794 0.118428907  
0.1498868 0.212258739 0.3477921 0.6176572 0.069074432 0.3128368  
0.2469883 0.2952012 0.1371799 0.6927142 0.1152123 0 0.1029001  
0.1919427 0.399063063 0.2769784 0.715189924 0.12512 0.09491144  
0.266109599 0.4412865 0.1108114 0.03698703 0.6401096 0.0741679  
0.273240238 0.2573271 0.222776923 0.1745534 1.653699344 0.669884548  
0.210145395 0.4632309 0.4300948 0.67169813 0.5513448 0.42856216 0  
0.210175506 0.0431608 0.4218993 0.1531141 0.353002239 0.2763703  
0.9883795 0.2641798 0.617704532 1.422518 0.244871284 0.7372708  
0.6628341 0.2816908 0.1608732 0.2078165 0.2144412 1.160082

0.440737607 0.2683088 0.07038386 0.04326481 0.3079747 0.6055887  
0.1720799 0.1705148 0.6648587 0.388165031 0.3474033 0.6671024  
0.191548219 0.2686209 0 0.1014633 0.2245124 0.058317 0.2444664 0  
0.5388237 0.153509417 0.258177105 0.08913734 0.3315258 1.298455  
0.556086507 0.5949258 0.149191 0.2356536 0.184911426 0.9190386  
0.5846406 0.034805946 2.152733 0 0.285351097 0.6163307 0.265243604  
0.1758598 0.1282844 0 0.4377502 0.07835989 0.090106438 0.7339057  
1.566913302 0.249087942 0.4586945 0.31559731 0.4228212 0.2880099  
0.0566499 0.2622135 0.3101439 1.015239769 0.1057337 0.3520421  
0.09056664 0.06472325 0.3948195 0.2899854 0.2933256 0.367891  
0.2060256 0.9113088 3.436863 0.986973757 0.648979509 0.4033788  
0.294296269 0.253721714 0.3145848 0.948832322 0.08041986 0.2322221 0  
0.59375299 0.026925133 0.409355438 0 0.495719 0.6556733 0.1491943  
0.5268735 0.3405182 1.104311712 0.261907 0.4151722 0.405838125  
1.034187 0.3419058 0.517778244 0.1848021 0.6120039 0.040192816  
1.538655 1.705492 0.215949611 0.3020064 0 0.392908 0.173049491 1.833826  
0.2691022 0.200911712 0.1268855 0.352773808 0.07875656 0.1793027  
0.805864305 0.09656552 0.434862445 0.5230078 0.5632341 0.1680451  
0.0969481 0.07045307 0.22887002 0.3577493 0.3269699 0.2300468  
0.5193452 0.05172864 0.05985541 2.635826 0.07378251 0.560831213  
0.129313234 0.4887598 0.4644937 0 0.8085388 0.755301546 0.2539527  
0.889242494 0.2825268 1.155228 0.138351139 0.819004398 0.3940604  
0.432136 0.728091072 0.08469747 0.4408312 0.07319712 0.1135286  
0.1347847 10.82751 0.4322776 0.2109161 0.1053411 0.6248736  
1.193972 0.239793 0.07102013 0.232413281 0.1209965 2.345433 0.252395989  
0.03630734 0.02389339 0.1695398 0.1760011 0.3300706 0.444378157  
0.2720658 0.1505376 0.357344 0.04728058 0.9308717 0.148323578  
0.1370154 0.2119947 0.2243713 0.406763892 0.108579892 0.5393504  
0.6571611 0.2921986 0.039227832 0.3614648 0.9407579 0.82593972  
0.832765 0.2900249 0.354144 0.06165741 0.1763121 0.13575 1.504928315  
0.3771075 0.049749316 0.06907185 0.2718993 3.229807 0.3591926  
0.5959093 0.6716465 0.4080444 0.092290976 0.4716499 0.1746127  
0.230398664 0.1933978 0.2713586 0.9442497 0.2197209 0.1230864  
1.545818 0.3260649 1.66334 0.089434338 0.3612094 0.193656852 0.225547  
0.2522924 0.1564348 0.252495321 0.181512968 1.812735 0.3644806  
0.5225832 0 0.2368394 0.09517229 0.5250886 22.33873 0.2411122  
0.369705872 0.1593556 0.3072017 0.176102346 0.2132791 0.047994935  
1.34965 0.280673 0.625632897 0.5205653 0.5592683 4.03250817 0.42495967  
0.132736 0.8712978 0.9285747 0.5533344 0.2512525 0.4425246  
0.3657781 1.7585 0.2271281 0.908447451 0.1594087 0.33991847  
0.1654448 0.072217309 0.07515498 0.593172 0.286060873 0.07228791  
0.2209646 0.04517426 0 0.1212131 0.1450097 0.13020406 0.232538256  
0.1375951 0.3211186 0.08798268 0.079018904 0.203160636 0.984124828  
1.719365 0.08578233 0.2249656 0.1477236 0.2019443 0.1875746

|             |             |             |             |             |             |             |             |             |             |   |   |
|-------------|-------------|-------------|-------------|-------------|-------------|-------------|-------------|-------------|-------------|---|---|
| 0.2418389   | 0.3470226   | 0.2408516   | 0.1705252   | 0.3408848   | 0.056461699 |             |             |             |             |   |   |
| 0.1766216   | 1.096747    | 1.32264     | 0.3510049   | 10.00894    | 2.542057    | 0.5051232   |             |             |             |   |   |
| 0.2619289   | 0.3342416   | 0.1181174   | 0.18708189  | 0.2037644   | 0.2140278   |             |             |             |             |   |   |
| 0.5902381   | 0.1166777   | 0.122564951 | 0.2659365   | 0.4537493   | 0.5114604   |             |             |             |             |   |   |
| 0.3278829   | 1.479465    | 0.143065    | 0.1515046   | 0.291562504 | 0.3293312   | 0.3742482   |             |             |             |   |   |
| 0.764854209 | 0.406368    | 1.12874     | 0.2814653   | 0.2618028   | 0.3053748   | 1.092575386 |             |             |             |   |   |
| 0.033978435 | 0.1759547   | 0.3701927   | 0.2217691   | 0.192454344 | 1.456461954 |             |             |             |             |   |   |
| 0.100009933 | 0.1770298   | 0.1403157   | 0.1827951   | 0.1958786   | 1.169705    |             |             |             |             |   |   |
| 0.07375044  | 0.07512813  | 0.197505525 | 1.729927045 | 0.1916548   | 0.313506461 |             |             |             |             |   |   |
| 9.454781    | 0.440938809 | 1.28497     | 0.2377737   | 0.2164956   | 0.4908478   | 0.3116689   |             |             |             |   |   |
| 0.2195458   | 0.8062802   | 0.7399911   | 0.04590092  | 0.73134606  | 0.4979346   |             |             |             |             |   |   |
| 0.4134608   | 0.3753852   | 0.6690418   | 0.400520335 | 0.3628628   | 0.09520187  |             |             |             |             |   |   |
| 0.3161013   | 0.276676759 | 0.2779965   | 0.09395133  | 0.1514948   | 0.3945134   |             |             |             |             |   |   |
| 0.3533741   | 0.4009145   | 0.4459841   | 0.344366674 | 0.070032722 | 0.301519902 |             |             |             |             |   |   |
| 0.2405825   | 0.194688921 | 0.297784519 | 1.57412     | 0.3554948   | 0.290193087 |             |             |             |             |   |   |
| 0.5013783   | 0.3221096   | 0.09452745  | 0.296585614 | 0.3323495   | 0.04839327  |             |             |             |             |   |   |
| 0.3602506   | 0.272237613 | 0.3174535   | 0.6758284   | 0.03107687  | 0.1237032   |             |             |             |             |   |   |
| 0.473735    | 0.1068223   | 0.1507824   | 0.3731384   | 0.267081    | 0.102811    | 0.487118    |             |             |             |   |   |
| 0.698945803 | 0.02882774  | 0           | 0.1387645   | 0.4700561   | 0.08791829  | 0.2412126   |             |             |             |   |   |
| 0.1170739   | 0.241017436 | 0.264556697 | 0.191452679 | 0.07026287  | 0.3410218   |             |             |             |             |   |   |
| 0.7953344   | 0           | 0.5466448   | 0.211883413 | 0.2363896   | 0.3526111   | 0.07474012  |             |             |             |   |   |
| 0.6173532   | 0.1323783   | 0.361825522 | 0           | 0.2995798   | 0.3162971   | 0.8199557   |             |             |             |   |   |
| 0.06661096  | 0.786852    | 0.1865557   | 0.31380754  | 0.03329471  | 2.291725    | 0.07394396  |             |             |             |   |   |
| 0.2202703   | 0.1015511   | 1.482758    | 0.3866751   | 0.5061403   | 0.535249949 |             |             |             |             |   |   |
| 1.147040049 | 0.26533966  | 0           | 0.7688014   | 0.5340227   | 0.5228915   | 0.4491443   |             |             |             |   |   |
| 0.2719618   | 0.157068419 | 0.2316432   | 0           | 0.04110421  | 0.3796272   | 0.04537406  |             |             |             |   |   |
| 1.104595    | 0.08352109  | 0.576404964 | 1.550228    | 0.6408986   | 1.538209    | 0.6063567   |             |             |             |   |   |
| 0.2244389   | 0.05032661  | 0.3904007   | 0.119628938 | 0.343799    | 0.437629482 |             |             |             |             |   |   |
| 0.06510631  | 0.1470209   | 0.121963252 | 2.081923    | 0.604018    | 0           | 0.341699986 |             |             |             |   |   |
| 0.6201687   | 0.369477    | 0.4807562   | 0.412030441 | 0.4489756   | 0.5321061   |             |             |             |             |   |   |
| 0.08868321  | 0.034747    | 0.4117348   | 0.2300286   | 0.3145306   |             |             |             |             |             |   |   |
| AL135999.3  | 5.587486    | 0.047742817 | 0.0402279   | 0           | 0           | 0           | 0.02118166  | 0.039994565 |             |   |   |
| 0.1965968   | 0.02327625  | 0.039045769 | 0.03536751  | 0           | 0           | 0           | 0.01779869  |             |             |   |   |
| 0.1085436   | 0           | 0.01938882  | 0           | 0           | 0           | 0           | 0.05304504  | 0           | 0.120339218 |   |   |
| 0.03325953  | 0           | 1.881692    | 0           | 0.3353997   | 0           | 0.096973    | 0           | 0           | 0.030154457 |   |   |
| 0.018933313 | 0           | 0.02014238  | 0           | 0           | 0           | 0           | 15.86825    | 0.07920407  | 0           | 0 | 0 |
| 0           | 0           | 0           | 0.07466658  | 0           | 0           | 0.02306977  | 0.1562842   | 0.03944009  |             |   |   |
| 0.01990395  | 0.03031231  | 0.02936816  | 0           | 0           | 0           | 0           | 0           | 0.04891268  |             |   |   |
| 0.03165257  | 0           | 0           | 0.09638704  | 0.03131877  | 0           | 0.0196377   | 0           | 0           | 0           |   |   |
| 0.030834117 | 0           | 0.03626009  | 9.197209    | 0           | 0           | 0.01903634  | 0.043387206 | 0           |             |   |   |
| 0.1007735   | 0.03407307  | 0.03669893  | 0           | 0           | 0.01686667  | 0           | 0.020905011 |             |             |   |   |
| 0.01443072  | 0.03672004  | 0           | 0.02535161  | 0           | 0.020162585 | 0           | 0           | 0           |             |   |   |
| 0.04834362  | 0           | 0.01903442  | 0.02214728  | 0           | 0           | 0           | 0           | 0           | 0.178397987 | 0 |   |
| 0.02035045  | 0           | 0           | 0.027327883 | 0           | 0.01421423  | 0           | 0.01829309  |             |             |   |   |



0.03433538 0 0 8.763947 0.04991155 0 0 0.032818093 0 0.03800305  
0 0.020488787 0 0 0 0.6563419 0 0.027969276 0 0 0.6576614  
0.02001539 0 0 0 0 0 0.01850605 0.03911413 0.028676062 0 0  
0 0 0 0 0 0.05508942 0 0 0 0 0 0 0.227139103 0  
0.074779793 0 0 0 0.01819523 0 0.05912823 0.03351367 0.0189982  
0.01826731 0.03982507 0.064686785 0 0.01680242 0.02167313 0  
41.63875 0.05075178 0.02328056 0 0 1.267014889 0 0 0.02492493 0  
0.015248215 0 0 0 0 0.013034313 0 0 0 0 0.05750517  
0.06206431 0.04813083 0.01523798 0 0.05236156 0.02980618 0 0 0  
0.038728 0 0.037536135 0 0 0 0 14.27609 0.07461621 0 0 0  
0 0.02524952 18.44117 0 0 0 0 0 0.061377057 0.01451805  
0.726063 0.02064642 0 0 0.01611464 0.019453322 0 0 0 0.01742657  
0 0 0.044773276 0 0 0.02602954 0 0.05532473 0 0 0 0 0  
0 0 0.018605381 0.01822036 0 0 0.01242018 0.04638478 0 0  
0.01843604 0 0 0 0 0.0178267 0 0 0 9.350265 0.1030151 0  
0 0.03825098 0 0.01484087 0 0 0.029854855 0 0.04341304  
0.016590923 0.08037367 0 0.01695373 0 0.094307225 0 0 1.70959475  
0.213526534 0.07503178 0 0 0 0 0 0.01378425 0.1988058 0 0  
0.04505457 0.019214603 31.30619 0.081644691 0 0.2095643 0.017966877  
0.1225868 0.3122622 0.0255357 0.07512451 0.02283942 0 0 0  
12.32789 0.04950519 0 0.022333545 0.016405829 0.025286235 0.03239689 0  
0 0 0.0456613 0 0 0.05884854 0 0 0 0.223413102 0  
0.01999868 0 0 0 0 0 0.0185076 0 0 0 0.02879553 0  
0.01756023 0.0131909 0.04618827 0 0.02331739 0 0 0 0  
0.02854705 0 0 0 0 0 0 0 0.01849869 0.06277073 0 0 0  
0.0261574 24.6457 0.027197212 0 0 0 0 0 0 0.05086155  
0.02084449 0.169871 0 0 0 0 0 0 0 0.01748266 0.06165822  
0 9.459396 0.04143334 0.05577273 0.02594646 0.045934297 0.03518349 0  
0 0.02521266 0 0 0.02690743 0 0.017377481 0 0 0.0570904 0  
0 0 0 0 0.019793731 0 0 0 0 0 0.02870727 0 0.01232237  
0 0.07124483 0 0 0.05471062 0.02036392 0 0 0 0.0351337  
0.06992581 0 0 0 0.06489978 0 0 0.01529743 0.020794408 9.71211  
0.0560205 0.2157088 0 0.01656588 0.1363505 0.01654462 0.015137795  
0.018693276 0 0 0 0 0 0.0147144 0.095817228 0 0.02214675 0  
0 0.0187074 0.014609247 0 0.02116797 0.01489946 0.02015205  
1.411996 0.0342142 0.02636363 0 0.01882053 0 0 0 0.1148078  
0.03104296 0 0 0 0 0 0.1062781 0.04656226 0.01588776 0  
0.9463106 0 0.066589659 0.02182353 0 0.04647003 0 7.33551 0  
0.06294939 0 0.2190747 0 0 0 0 0 0 0.01690569 0  
0.015461202 0.01840135 0 0.775600668 0 0.02276225 0.02926221 0  
0.03186939 0 0 0 0 0 9.290768 0.0589244 0 0 0  
AP006621.2 0.9462833 0.47776439 0.4025623 2.65029187 1.108702947  
1.052724565 0.9084249 1.143506586 0.3372604 0.06655039 0.279094756  
3.690924 0.8981591 5.367413 1.662824 5.648703 0.8689602 1.004966566

0.5543563 0.3102173 0.762230888 0.8393471 3.814430205 4.701583 2.45433  
1.204239635 0.665659 0.2686397 0.1195567 1.745792 0.3596098 0.165603788  
1.016623 3.02443206 0.9027606 4.009056333 2.057064487 2.280415796  
1.036623 4.112781 1.18898678 5.451325 0.173160239 4.23138 0.509527591  
4.743433 4.517405 1.608507 0.518655658 0.5955585 2.80758 8.539333 2.928441485  
1.447562 0.791520558 4.021566 0.507444 5.520124 0.2600027 1.847298 0.6065138  
5.089072 7.479348235 0.3613665 0.1706313 4.754863 0.1357494 2.656609  
3.949234 0.3444819 0.7163618 1.686006431 0.1684417 0 1.547898462  
0.8682888 0.528957107 3.498341 0.2073464 6.597625 0.4938824 0.5311916  
2.231541 0.062025372 2.587043679 0.9364129 0.5358111 1.416527 1.909834074  
0.6410115 0.04822443 0.285647 3.227615916 2.929435 1.732307 0.731292537  
1.522168 4.29833641 0.288239774 0.2846034 0 0.2131681 2.004217 0  
2.231317 0.6965477 0.291259543 1.231757 5.137237182 1.107081881 0.3177175  
2.153618267 1.801592 3.491106 2.655165 0.2825259 1.72654 1.015750453  
3.503172 3.942146 0.3903295 0.3138166 0.4908509 4.07746 0.948144  
1.698812 1.569753 4.173089 2.990964 2.439632314 1.216699472 0.3259698  
3.725852946 2.694708381 0.6609604 4.217125345 2.209564 0.1251055  
0.826436074 4.398267088 0.130548971 2.315596871 0.9401779 1.659586  
2.573551 1.205637 5.29166 1.773333 0.704520584 0.6878517 4.081917 1.393818171  
3.104121 1.487735 0.366113886 2.439193 0.6594126 0.909433215 1.934154  
1.338828 0.44873634 2.657444 2.570879 0.4884745 2.852757414 2.150225  
4.784145 0.162356472 0.2871008 1.567918095 4.391372 0.50713 0.558186694  
1.092482 4.146658404 1.352454 4.072383 0.4345503 0.4178326 0.6262633  
2.0960948 0.5203741 0.3843257 7.250119 3.357457 2.591714 0.1934763  
4.725954 2.265695 4.475418273 0 3.949661 2.189581 2.494248 0.8711721  
1.831074348 2.544714 1.564002204 3.538797 2.427199 0.149068481 1.953992887  
0.2547517 0.1904774 0.784492493 1.23199 0.3288324 3.075825 3.577951  
2.221954 5.040278 0.7984524 0.4261024 0.3830668 2.625789 6.605494  
0.166094 0.2295651 3.64893528 3.079978 0.6170879 0.339934738 0.2933991  
1.699123 2.740098 2.275619 0.7274443 1.137154317 4.020224 0.2432985  
4.331537 0 2.507454 0.239720148 0.3690733 0.08565632 0.5698443  
0.931331764 0.350973032 5.728292 0.5793284 1.298689 1.077798486 1.428041  
2.626232 1.168021268 1.922732 4.486487 0.1144733 1.843535 0.05699101  
1.316392 2.560274636 0.7313762 0.643237629 0.2976899 9.960705 2.530911  
0.5805261 2.215146 0.3473642 0.512929 2.983208311 2.413884 4.139059  
0.212782669 1.354466 0.1315707 1.587137 1.562494 2.387183 0.8817694  
0.6587315 13.12516 4.047218724 0.5189206 0.521646098 3.371887 5.300806  
0.3792442 3.322955269 0.660061681 7.87367 3.313533 2.413136 0.1638275  
0.7655582 0.461451563 0.5516204 10.78964 0.4453541 1.195035177 0.10302  
0.06206231 0.142308058 0.05745019 0.930831339 0.29084 2.665034 2.224521477  
2.576592 1.446221 4.07333022 5.494548968 0.1072637 0.2011699 3.116963  
1.86312 2.740996 4.951433 3.547017 3.358826 0.6607508 1.835287764 0.322045  
0.109875055 1.470652 0.350152232 1.821979 0.2396707 0.565070949 2.570293  
0.1785612 0.292042 0.071597538 0.9795217 0.1757732 0 2.91266448

0.8339279 0.377448 1.315326 1.979507008 4.784494289 7.374320776 0.09262774  
0.7625264 0.09089718 0.1193752 0.3916582 0.606315 0.1302864  
0.2243428 1.654371 0.2296686 0.5008518 0.638772671 0.6184867  
0.8005104 1.129323 0.737481 12.58166 4.450837 0.5679156 0.3704126  
4.910912 1.399941 6.349585685 3.78722 0.6053446 1.405808 0.2640039  
3.301485469 0.4298059 3.800078 2.801326 0.158977 6.00557 0.4046373  
0.734584 2.120501236 0.4879088 0.465276 0.285266589 0.3648727 2.806563  
3.639228 0.3702343 2.019052 0.794617767 3.899025411 1.535639 5.38474  
2.293904 0.388805211 2.421184841 1.777993495 1.487798 0.8504172 1.181732  
1.013051 1.017947 0.2979881 0.2428437 3.894336051 3.095464276 0.464628  
1.520064776 11.9523 0.814450355 1.887968 1.460299 0.699799 2.908792 1.475176  
1.379892 1.836197 0 0.9644042 2.560998792 8.852365 0.801881 0.8824676  
0.5046083 8.415157886 0.6964186 0.461595 0.943167 0.794958575 0.8486725  
0.5567609 0.1632303 0.2550446 3.115212 0.4954964 0.4004434  
4.80036837 2.829667192 4.142182736 0.1666409 0.755173646 0.180479438  
3.367177 0.2462356 2.626451798 2.325284 0.3786128 0.254625 3.971681191  
0.4297138 0.6257046 0.291118 0.366658052 0.3664768 1.14976 0.3515844  
0.8663578 0.4872313 5.524666 0.5848657 0.2783378 5.118203 5.704923  
1.618295 0 1.39774 3.764025 0.6728125 1.772641 0.5683732 0.2923853  
0.2838218 0.389531702 0.213787894 0.30942528 0.05677932 0.9448432  
0.3460739 2.525694 2.692528 5.890060444 0.3183769 7.661841 0.1610597  
0.09977645 1.01626 0.083540198 1.683906 6.112773 3.32279 0.5185605  
2.260785 5.624862 5.879462 1.883792345 0.3228649 1.889734 0.35852406  
0.3560002 2.133647 1.508863 2.187301 0.7089529 3.398487161 5.561528686  
1.372291877 0 2.440693 0.5451069 0.5633972 1.253837 0 0.825023995  
0.9359528 0.478652714 0.4650276 1.09076 1.833336 3.34733 0.2699731  
1.863168158 1.148342 0.5483745 0.6669889 0.762216 0.6045624 3.253509  
2.766537 3.721871099 1.611376 0.618883594 0.4735109 0.3168198 1.478374983  
10.22635 1.366697 0.7529868 4.878248561 0.4100379 6.701324 8.845809  
1.452921683 1.140281 0.5292237 0.3344356 0.168474 1.863245 1.221535  
0.6469827  
AC097359.2 5.598153 0.519275581 0.5469244 1.330261377 0.99791884 1.109248572  
0.7487439 1.69922494 0.3341075 0.4193037 0.862635278 0.6371186  
0.955012 1.375392 4.052306 0.8348472 0.3394157 0.756634518 0.7908105  
0.5236687 0.829454071 0.4989003 0.425970591 0.9074868 1.0303  
0.58285688 0.7969757 2.065156 6.658641 0.7917136 2.336987 0.505291425  
0.5822981 0.556429427 0.8786706 0.763567911 1.010336756 0.611398316  
0.8146999 1.12245 1.013993858 0.990759 0.802814067 2.710712 0.673019095  
1.608747 0.9321873 0.4412686 0.598071414 1.123933 0.6560111 1.02783  
0.68834366 0.8300501 0.760597472 0.7082614 1.374047 0.6562223  
0.6645361 2.784971 1.287523 0.7578166 1.386621578 0.5756453 1.622747  
1.105562 0.7907445 0.9806821 0.5752756 0.3112305 0.7025683  
0.563998997 1.014552 2.13885 0.441627288 0.5892176 2.11176918 0.7797684  
0.9058496 2.095238 0.3874982 0.6735691 0.7117311 0.53088941

0.902787735 1.875298 0.6485436 1.715126 1.028346872 0.4064122 0.7338026  
0.7583776 0.45474743 1.314506 0.6926854 0.949594791 1.90431 0.471672424  
0.657896124 0.4567473 0.939146029 0.5068207 0.2957682 0.220499658  
0.9057485 1.00118 0.588614933 1.138893 0.842945574 0.556342453 1.73111  
0.768054735 0.6055841 0.5533551 0.5006722 1.444205 0.6951949  
1.681219573 0.3758214 2.024311 0.7192257 0.5036304 0.4551414 1.14773  
0.9831134 5.038696 1.068763 0.6011434 0.6603265 0.881211814 0.498755286  
0.6652204 0.386379342 0.362125806 0.9428853 0.79300379 1.228364 1.02619  
0.181375802 0.475325489 0.905299825 0.471898232 1.996897 0.6462903  
1.097781 0.5064113 0.5278344 1.112207 0.541597127 0.7359351 0.7710837  
0.760245737 1.617977 0.5002589 0.553363307 0.4970859 0.5487285  
0.525114341 0.4598575 0.8613227 0.770538378 0.6060354 1.292342  
1.451724 1.296675987 0.7530276 1.026669 0.797759942 0.4193117 0.643897107  
1.694733 1.51578 0.744664301 0.9709504 1.119575116 0.9546152 0.4841175  
0.3745246 0.4967119 0.5752881 1.026035127 0.3849137 1.187887  
0.5524878 0.7075458 1.669694 0.9717547 0.7279828 0.9072562  
0.659986125 3.147037014 0.6103871 0.7585694 0.3812293 0.9665914  
0.689303557 1.005117 0.733652975 1.282413 0.6769617 0.575932222 0.457081148  
0.4391242 0.3849413 0.893732552 0.9031502 0.8665172 1.476658  
0.4253404 1.077285 1.043514 0.6525652 0.4356269 0.6628351 0.6643173  
1.526383 0.625257 0.4434671 0.644289141 1.981817 0.3982307 0.436436932  
1.025435 3.580708 1.026074 1.293431 0.7609999 0.498042075 1.411349 0.861902  
1.158582 0.5541268 0.6955237 1.040158668 0.6668965 0.7840654  
0.8560133 0.742442006 0.959629905 0.7697911 0.6829559 0.3017541  
0.648170542 0.6018866 0.9256508 1.791855307 0.9142837 1.663719  
0.6123771 0.6515452 0.541999 0.8520029 0.684811843 0.7535205  
0.49703502 1.256304 0.6442955 0.6957623 1.085787 0.377825 0.8413659  
0.723002 0.543778895 1.449894 0.3690329 0.96121832 0.613101 0.4952948  
1.059488 0.8865173 0.35473 0.9172026 0.5011764 1.033931 0.429576824  
0.7017049 0.520903697 1.473372 1.066408 0.8866494 0.997962729 0.3574605  
5.093623 0.4551812 0.8462642 0.934825 0.4420397 0.612564555 0.9483246  
2.35153 0.8934113 0.629138892 0.4286393 0.6935184 0.524437063  
0.689787 0.959014735 0.6165791 0.7010363 0.913544495 1.675277 0.6071069  
0 1.088636743 0.5738094 0.5978677 0.7616632 0.6998904 0.89909  
0.9287074 1.499246 0.8600117 0.2443742 0.443623904 1.148524 0.594309525  
3.345582 2.601591511 0.67144 0.9900838 0.793881786 0.7013803 0.6934164  
1.223789 0.92774106 0.7995805 0.5223899 0.675436969 0.982909716  
7.395534 0.998365 1.229778 0.781870387 1.143120255 1.306374311 1.145187  
1.293791 0.7996213 0.4115422 1.17175 0.5354339 0.7589226 1.200126  
0.6478495 1.032038 0.6073117 1.529570821 0.644754 1.407056 0.4171397  
0.5327663 1.94083 0.9157629 0.5105654 0.6542191 3.053276 0.771595  
1.05675817 0.3425571 0.7196227 0.6505739 0.7397728 0.580862441  
1.042329 0.5864778 1.015428 0.5921656 0.5090066 1.656102 0.8004885  
1.071345748 1.144216 0.3927093 0.994751303 0.8154576 0.6839602

0.8961514 0.7042045 1.210774 0.582520127 0.985772854 1.359013 0.9601922  
2.628952 1.395857906 0.58364732 0.413121819 1.129226 1.125536 0.6251454  
0.6849439 0.6569208 0.8147587 1.183622 0.834830804 0.451076175  
0.8285121 0.662576023 2.338137 0.93189621 1.062341 1.425328 0.7665442  
0.4086631 0.4319997 2.798037 0.8660938 1.061573 3.139554 0.749407767  
0.6457622 0.7149462 1.003165 0.3513519 2.106566796 0.6623119  
11.95329 0.6166709 0.561112975 0.8308477 1.600515 1.144867 0.4093098  
0.6110458 0.493885 0.5902895 0.860123878 0.901513727 0.965519987  
0.6471256 0.441387247 1.487551465 1.360965 0.5951981 0.418162286 2.51296  
1.271499 0.4903636 0.407022653 0.5172215 6.229545 1.211265 0.767142574  
2.483268 0.7722499 1.116543 0.2614388 1.481127 1.898454 0.5967801  
0.2591916 0.982305 3.884783 0.3951589 0.664376542 3.860468 2.218262  
0.8331535 0.8955956 0.9177875 0.4982014 0.9953367 1.759659323  
1.258028556 0.713608005 0.6277336 0.8704897 0.7875493 0.6365299  
0.7601968 0.863036882 0.6585564 1.181815 0.8137256 0.8421484  
1.398866 0.43696874 6.830375 0.5827793 1.29137 0.9452315 1.85571  
0.4302768 0.9408804 0.508175686 1.029906 0.6469868 0.454620714 1.65991  
1.44382 0.5750418 1.42747 1.024315 0.719865251 0.503729123 0.550582572  
1.553288 0.7227252 0.7506154 0.9655655 0.8237189 1.358557 0.648819462  
0.7491801 1.194928751 0.544919 1.280467 3.55684 1.708423 1.032354 0.851884852  
0.8438977 0.4997882 0.4901591 0.3300824 1.214591 0.3577634  
1.609785 0.517148539 0.5614615 0.625359982 1.200856 0.9980684 0.837725196  
1.223533 0.673092 0.6464879 1.291136781 1.413592 0.7966413 1.094205  
0.827620032 1.312414 0.8493276 1.181354 0.8745509 0.9334609 0.8144607  
2.202983

KMT2E-AS1 5.928186 6.847461673 2.61853 6.505298236 5.958847945 4.616072391  
3.037957 3.176959602 4.33795 1.309668 1.809262093 8.779408 3.273183 4.11923  
8.555107 9.779026 3.496755 3.834772784 1.540146 1.364619 2.96384176 3.497888  
10.74912965 6.905657 5.59352 3.119990421 3.834516 2.073198 17.27691 6.936079  
1.896421 2.98206822 2.924298 8.61383924 2.743239 5.688867805 8.731344372  
5.616657776 4.177793 10.03608 3.650402938 5.66327 2.516783688 6.222632  
4.063297923 6.433129 7.26852 31.17693 4.32288216 2.068271 5.304727 24.34232  
7.062477766 6.998555 6.286637695 8.218792 5.743677 13.43906 1.555071 6.739353  
3.075891 9.694565 14.911273066 3.123464 1.185146 5.072564 2.33971 8.812303 4.05655  
0.6646253 2.591458 3.888341677 2.469868 1.118088 5.49503954 2.275522  
4.796548552 3.944249 2.940319 10.14692 1.10533 1.673927 5.355521 0.52654147  
14.716305445 4.05805 2.048736 19.45472 3.836458568 2.102448 2.567951 2.700451  
9.663682155 3.566269 5.975488 3.516440951 5.370132 7.336103008 2.246703717  
3.788783 2.29220516 1.864448 3.920168 5.099541439 4.598985 4.080517 1.067687836  
5.844399 8.180491816 1.961186801 2.022859 6.363831093 4.626539 11.83213  
15.43887 5.423652 5.243791 5.035013846 21.06779 4.265504 3.483001 4.036409  
3.352458 2.495687 13.6791 5.440816 2.34946 6.668403 11.98089 10.137936956  
3.156897336 4.549109 9.146176249 4.227037237 3.864905 3.846251673 3.460567  
0.8448024 0.686854062 12.589822235 1.544829487 5.041996449 4.014832

3.047344 6.678781 10.01771 14.73916 4.837117 6.995685188 1.817113 5.372559  
4.555753512 11.05648 3.378821 3.047443299 6.550054 2.629288 3.233501092  
6.432664 31.93884 3.001330736 4.352831 14.34183 4.862976 5.957228718 6.727349  
6.593057 2.672999301 3.402635 1.265024826 5.721996 2.599829 5.456477179  
8.511411 8.217304923 27.92009 15.04855 4.757913 3.809033 3.558933 9.943718265  
1.963344 2.205957 15.47049 4.917165 4.774497 1.138513 6.446817 4.302292 7.170028944  
1.720428244 14.32611 3.186452 8.992074 6.947282 4.155221381 4.624562 6.181806009  
8.413328 8.537308 2.200177864 2.675435562 4.64472 2.008984 3.17847366  
2.931557 6.640389 8.718911 2.088634 2.857948 5.047973 2.907679 2.597835 1.363172  
5.481738 14.77765 5.469067 1.771643 4.596748552 8.772039 7.041414 1.705216106  
3.962482 3.248397 6.58182 13.63787 6.268936 8.706581691 15.31891 2.121722  
17.02051 3.508849 3.902452 3.65377802 5.240841 16.45998 2.458721 6.743520821  
1.760587544 10.17092 2.10505 3.530651 3.66961441 4.583629 8.782653 3.584168784  
10.48586 10.74894 1.722699 3.153073 1.737297 3.696789 5.606514444 2.634014  
2.761289793 3.27378 15.60022 7.1414 2.284875 8.882045 5.730094 6.248734  
8.038719569 13.55497 13.17638 2.812142696 5.146063 1.929227 4.475436 2.740541  
11.46309 5.727507 3.609419 11.43094 13.58119971 4.880744 2.294675826 9.846228  
6.647614 2.585319 4.701500118 5.348651992 1.271809 4.574516 4.492826 11.25246  
1.329325 1.543187653 1.719202 1.921566 0.9666483 4.743027812 2.882042  
0.8860743 3.917080857 1.463106 2.454393142 2.955292 7.220369 6.190705521  
7.791505 3.05185 0.9430645 6.566666199 1.365864 3.49314 5.790975 2.789414  
3.486384 9.553036 8.212115 17.24768 3.852784 6.609695788 4.249943 2.162269418  
5.184704 3.242714149 3.351187 2.774449 5.094293287 6.762259 2.664185 3.098979  
3.121886134 1.663057 1.198251 1.563112128 4.640654767 2.831729 4.187314  
2.510286 6.086012343 9.737751112 10.628876349 2.144534 2.781865 0.1402978  
1.45867 3.853789 2.122338 4.901673 3.765667 2.40328 0.8684969 1.720045  
2.57046487 2.40491 3.46401 3.563987 4.137231 4.219123 4.82205 1.575078  
1.858102 6.973496 4.247894 7.933695571 13.53359 7.140998 4.84338 2.051974  
12.102456245 8.192941 18.8051 11.51828 2.392432 9.076353 3.055828 2.01567  
7.81870806 1.574615 2.818713 3.008735654 4.618019 8.447145 4.940012 1.693937  
4.484099 6.115341869 3.771883278 7.088729 7.156892 6.265187 1.320247261  
9.809746191 8.513549386 4.570688 5.141018 2.667566 5.619268 4.236573 1.609784  
2.764327 10.666747435 16.182809379 4.33274 6.005121325 3.210906 3.378419748  
5.439536 7.088046 3.336813 8.367087 5.831089 3.255602 6.651064 3.507317 1.259531  
4.713008646 9.432427 1.031405 2.511316 2.420004 7.399762843 2.588263 2.879533  
3.199634 7.457867149 3.987513 3.749884 2.078525 1.820658 2.764751 2.72088 13.0414  
21.502973345 17.273580343 10.185514348 1.971917 3.351083052 2.762447048  
5.052798 0.3483876 5.139729625 3.9153 1.789666 2.39735 4.888308887  
3.191909 3.591425 1.954604 2.829643665 4.440344 5.501352 1.957462 7.251763  
2.739541 3.164392 3.25358 0.7697149 16.22797 3.868402 4.438664 2.202399019  
1.923664 3.059359 2.228387 5.887357 1.919032 5.189839 6.169526 7.264907369  
2.63981574 3.390897474 2.541492 3.737009 4.692955 15.74935 2.824685 4.017033134  
2.604461 17.20129 3.666734 1.617029 4.416777 2.691674275 7.12776 15.34344  
6.049182 4.913486 4.756484 10.83344 25.85742 3.718363527 5.419392 4.258475

2.421011657 2.335284 3.704892 4.72629 12.72909 6.334044 6.723765804 5.569444941  
6.718356936 6.425433 5.37676 3.084989 2.481959 6.595198 3.20368 3.599822505  
6.139647 3.355338182 0.9741028 8.075846 3.565439 7.233145 1.510529 2.709850344  
5.559021 2.915392 2.643899 3.886532 8.094893 6.339922 6.217849 7.050224205  
4.266704 2.405141173 4.263313 4.828918 4.525648634 19.1701 9.869293 2.647276  
6.836901375 3.445705 9.114435 8.095124 3.854388024 2.139998 4.798966 3.760843  
1.30018 3.594848 3.852801 2.496509  
AC124312.5 0.6488562 1.22955569 0.5484804 0.780143958 0.671368096  
1.57194489 0.449241 1.090598072 0.4765271 0.2115706 0.177454278  
0.5893705 4.600273 1.895952 1.174731 0.7549832 0.4604192 0.118329397  
2.056083 1.577941 1.864008946 0.7115659 1.102406558 1.928623 0.5689374  
0.364609868 5.03857 0.1897852 1.520333 0.6166728 4.509436 1.286930933  
0.5876275 0.763094088 2.86997 1.370452574 0.573651134 0.976907243  
2.135994 0.8593871 1.150408364 0.9442809 1.039822927 1.594311 1.799823827  
2.43939 0.8129039 0.3933547 1.209164385 1.814453 1.282412 2.431957  
0.705289503 0.09023433 0.698979597 0.1578392 1.374222 1.50765 2.755253  
0.5338868 1.652718 0.6244407 0.37742269 0.7658813 0.1205455  
0.8891887 2.877077 0.9384042 3.41874 1.095144 5.978146 1.95286479  
0.7139916 3.356203 0.546770103 2.300317 0.046711386 0.5792496 4.064918 0  
1.46543 0.4690871 2.595476 1.840394611 0.707482335 0 0.4645635  
0.6115576 0.714301418 1.981236 0.9709665 1.009002 1.013425009 0.3497833  
1.946984 0 10.90725 0 0.916344356 1.055581 0.389382135 0.2258945  
0.1464739 0.491393362 1.326444 1.409162 0.462972259 2.417213 1.916879545  
0.586588161 0.8417142 0.84080776 0.7241602 0.2466353 0.6791646  
0.8233309 0.6492191 2.069985136 1.086532 0.4737368 0.8272654  
2.937542 1.040311 1.489962 0.7814719 10.8014 0.1008164 1.248629 2.11302  
0.497169616 1.778397581 1.324151 0.756055901 0.68285764 0.7542992  
1.868810227 0.068867 2.386342 0.943142891 1.525369156 0.138342939 1.05164634  
2.391139 1.030942 2.192451 0.08517435 1.418009 1.879203 0.696809413 1.345694  
1.1851 0.347536752 0.9277911 2.117088 0.609669392 0.7912702 1.572256  
0.344188477 1.171215 0.6676508 0.58119914 2.298855 0.9340679 1.501148  
0.948414522 0.9237554 0.2633644 0.286748992 1.086575 1.434953534  
1.348853 0.9212681 0.460064324 0.9923189 1.638522749 1.522772 1.269268  
0.2878085 0.7748613 0.180996 0.39198261 1.96068 0.86545 0.8536624  
1.051198 1.594709 1.537703 2.327708 0.8845642 2.101155188 0.812067809  
1.046365 1.06071 0.8307069 0.3077275 2.540989811 0.8698829 0.985466496  
1.391154 0.4946359 0.355428206 1.736673504 0.337451 0.06728305 1.039159832  
0.07253011 0.2903868 0.5641367 1.94439 1.385064 2.700602 0.370178  
0.993391 0.09020811 0.8561701 0.9438002 0.3520202 2.189434 1.251017758  
3.004821 0.3736737 1.585009139 0.06218309 3.846657 0.5807372 0.9796626  
2.004272 0.761080501 0.931927 2.268849 0.6885205 0 1.328576 0.444555648  
0.5475505 1.270782 0.6587617 1.044988582 1.115779936 2.023427 3.581172  
0.6255558 2.284289328 2.063587 0.976499 1.001991237 2.445026 1.135364  
1.273729 2.217596 2.355345 0.8524895 2.984439538 1.097974 0.170409969

2.208237 0.5432913 2.346759 1.681504 0.6123635 2.30064 1.009453 0.263442525  
0.8077885 1.59497 0.338229168 1.380124 0.8365541 1.487827 2.144984  
0.2108084 10.1228 1.535729 0.7261597 0.45951897 0.6873761 1.713646362  
3.76634 1.890428 1.272638 1.915115095 1.088061876 88.09437 0.2340904  
2.045763 0 0.8112632 0.815001516 2.922765 55.99628 0.8258992 0.904557543  
0.9279492 0.9207453 0.351876143 2.252562 1.561805319 0.3082036  
1.442114 1.357249875 0.2228913 3.304587 0 1.374776245 1.250343 1.758735  
0.9786814 1.500507 1.022002 0.8162063 1.879389 0.4380742 0.07779984  
0.777942873 0.6142887 1.222564974 0.6375488 1.360541757 3.024848  
0.9524228 0.272184786 0.1238065 0.8199602 0.232108 0 1.384001  
0.3725342 0.167249059 3.883085192 0.7658861 1.34994 7.345979 0.473671152  
1.192973115 0.689521653 1.668682 0.1469182 1.637506 0.6746779 1.245122  
1.973433 0.9664532 0.4754727 0.4125033 1.654985 0.5838288 2.804334604  
1.008325 0.242372 3.889422 2.94569 44.60142 4.535153 1.128414 1.962634 1.457148  
0.7417597 1.345733085 0.6979692 0.8247659 2.128195 2.238122 1.049576724  
0.4554659 0.9184268 2.530584 0.5054046 0.6481965 1.53141 2.248826  
0.374516387 1.269093 0.8874967 2.468762345 0.8506434 1.784471 0.4131959  
3.250799 1.521488 3.415011515 0.523749682 0.6629817 2.219084 1.899104  
1.400859374 1.425407328 0.256928504 0.4244752 1.922535 1.440125 0.8051489  
0.5393601 1.073647 0.5790192 0.947142167 0.634890603 0.2461835  
0.690349248 40.56285 1.51037995 0.2667576 0.1628927 2.807403 1.120891  
1.563246 3.425898 1.129832 0.08449152 1.650892 1.461327669 1.279209 3.894708  
0.2922351 1.145859 0.857457247 2.757774 0.7337294 2.540333 0.579162917  
0.4761209 0.3754548 0.4324385 1.013517 1.925697 1.696407 0.4243505  
1.179584354 1.259413069 1.463159076 1.177264 0.733570419 0.701265875  
2.140921 6.697362 1.242524505 1.829413 1.404258 0.3777571 1.52387459  
1.138421 2.403593 2.221187 0.077709617 0.3106848 0.6092012 1.170948  
0.6355943 1.253919 0.3659061 1.704403 0.6390691 0.5227727 1.878218  
0.9269783 4.284268739 1.826797 0.3394675 1.663621 0.7379705 0.5521137  
1.807407 0.3508942 1.238361977 1.755772969 2.164129647 2.045751 0.5006259  
0.9954235 0.4282371 3.343683 0.653201774 3.103937 0.8723176 0.4693568  
2.008932 0.1133613 1.63776195 0.9733298 0.8979011 1.399438 0.7937501  
1.654214 2.073278 0.639023 1.22846619 1.254515 1.682146 0.316607068 3.311451  
1.30444 1.457861 1.37181 0.5779065 2.029869808 1.754035788 0.272666203 0  
1.316716 1.925502 1.393077 1.258762 0.9315706 2.622837475 0.5289763  
0.253614498 1.05598 0.8669099 2.486769 0.5675474 1.382773 2.05034062  
0.774391 1.420499 1.413618 1.615443 0.3203278 0.5171623 1.851602 0.870769222  
0.8832298 1.920650472 0.3345201 0 2.924387528 1.817798 0.2068987  
0.5319609 1.121681203 1.062155 0.7734201 2.913515 0.128305273 2.856117  
0.2103072 0.05062885 0.6546179 0.8462072 0.8442149 0.6856085  
AC015849.3 0.5183114 0.635527338 0.5020244 2.185042546 0.967843147  
1.643019078 1.65651 1.996450023 0.5233986 0.3485713 0.714665589 2.61879  
1.161554 4.477244 1.741876 2.576579 1.011413 2.144477836 1.580824 1.877578  
0.92130934 1.791066 4.170671078 3.501117 0.9819833 1.45171511 1.853946



0.5211316 0.2435232 1.24177 1.464968 1.092261053 3.254027 2.179196559  
1.608967 3.863478049 1.354663046 3.021332194 2.178514 1.988968 1.925429768  
4.05713 0.369503133 0.9850097 1.153165813 2.151583 2.728189 0.2160227  
0.724417411 0.6065422 3.29601 4.47265 1.936655602 0.8424337 0.844504858  
3.900699 0.5906315 1.821538 0.327845 1.0262 0.7059423 2.213461 2.642732236  
1.976853 0.6289115 2.726481 0.3686746 0.9493347 5.017469 1.162767  
1.459147 7.461687249 0.3594343 0.3921619 1.201101539 1.74755 0.436100566  
1.940486 0.8145146 1.810098 0.7473008 0.5152269 3.167521 0.469257525  
1.651275368 0.4611213 0.2551291 1.679277 1.569121148 1.989588 0.3087154  
0.277062 2.504488853 3.001471 1.680243 0.785701439 1.434236 2.020434927  
0.670984392 0.4554821 0.213841009 0.6616365 0.8446264 0.269863568  
3.420579 1.289807 0.889893399 2.389474 3.95819914 1.757141883 0.3389855  
1.64912529 1.193084 1.693091 1.172235 0.5343675 1.328916 1.955287599  
0.5967018 2.246896 0.5395025 0.365262 1.028373 2.672976 1.563401 0.8403551  
3.321982 2.342885 1.326204 0.819107318 3.515979479 0.5691112 0.645883821  
2.250071895 1.035616 3.16818612 1.739739 0.1820183 1.183898336 1.349632181  
0.886377575 2.374345426 1.203736 1.665215 4.375698 0.9355216 3.11497  
3.238412 1.667365382 2.124707 4.067709 2.004033649 2.501303 2.275851 0.760950992  
3.88198 1.15127 0.756086162 1.340017 0.7333214 0.60934962 4.576511  
2.650354 0.6254075 2.929784615 1.386643 2.205677 0.314953811 0.3102975  
2.073811191 1.148184 0.4216186 0.577504631 0.6963403 4.172006135  
0.8854694 5.938925 0.4109528 0.942264 0.3975979 1.14810207 1.144065  
0.5312043 5.01271 2.797672 0.486546 0.1125969 3.021511 3.539292 2.077043571  
0.202714394 2.988145 1.055819 1.32715 0.2112473 2.917783382 1.433168  
2.607594282 2.225549 2.553456 0.845841442 3.704939976 0.5189001 0.3325548  
1.826195639 1.832277 0.2232646 1.824453 3.043289 2.991889 3.065109 2.061987  
0.1983821 0.3220134 3.173795 5.053586 0.1288817 0.7681962 2.310933698  
2.304574 0.9234641 0.751757315 0.5463957 1.663039 1.35545 1.034637  
0.677358 2.368499155 3.94814 1.217689 0.8402709 0 1.216047 0.4185278  
0.3436617 0.4486425 0.6029649 1.785426757 0.817019188 3.454464 1.3486  
0.9962745 1.992420152 3.097635 1.876959 0.712119134 1.827646 0.8573395  
0.1998591 2.783681 0.331669 1.447072 3.762239634 1.312381 0.327550309  
0.8878846 4.603344 2.347446 0.4955092 0.7286457 0.9096957 0.6396597  
0.954871185 2.439918 1.642361 0.154790671 3.60778 0.4083725 1.456544  
2.645296 1.157718 1.582246 0.6900482 2.515461 2.355348602 0.4529921  
0.850026593 3.341261 2.877258 1.728877 2.069559861 2.006034453 12.57446  
1.928368 3.124714 0.2860268 1.177472 0.26854968 0.9383808 16.18106  
0.4535676 0.794824333 0.7194514 0.325064 0.220849664 0.6686825  
0.902855534 0.4795681 3.200923 1.647670901 1.591298 1.920021 17.06792136  
2.797941431 0.3121199 0.4390285 1.81397 2.732372 2.510916 2.977624  
1.949567 1.593854 1.367237 1.174885036 0.1499357 0.191831038 0.622452  
0.203777119 2.615486 0.3138311 1.375202474 0.3739566 0.4156671  
0.2124486 1.250022592 0.9500825 0.5455692 0.551099358 2.40591323  
0.3235458 0.6864449 1.489576 2.229693246 3.930944199 2.229955728

0.2695315 0.4841077 0.9521853 0.4168348 0.6837967 0.9577506  
0.7203132 0.4243205 2.152118 0.9356173 1.049326 0.743489502 1.218255  
0.5657003 2.981003 0.7593357 18.30529 1.892869 1.611228 0.7698857  
1.571895 1.22208 3.096972003 3.449799 0.3019635 3.681604 1.075491 2.075064801  
0.1500798 5.819791 2.886397 1.079393 3.721575 0.6055345 0.5462549  
3.187994003 1.058348 0.704016 0.332031604 0.2548127 4.409985 2.685209  
0.8926374 2.480602 0.976265362 1.086613639 1.820482 3.568984 2.044184  
0.407289394 2.544118407 0.37626688 0.5328307 0.7258752 1.788095  
2.616184 3.766047 0.9711482 0.3886495 3.715370325 1.801458718 0.2253319  
1.979881404 16.6412 0.296239627 2.60034 1.744421 1.39632 3.847321 2.428938  
1.514326 2.688752 0.04640108 0.8634641 2.025438935 2.458807 0.8166697  
1.027134 1.426375 4.850256118 1.322534 0.7163551 2.973166 0.983109631  
0.9006404 0.9131377 0.5699681 0.7050311 3.293528 1.042542 0.3262629  
1.619511306 1.745579941 2.977817965 0.3555916 0.622605594 0.385121423  
2.482143 0.7642721 3.493734476 1.783815 1.266956 0.6520069 3.666339958  
0.5626785 0.2275872 0.2710738 0.384089337 0.5545214 1.304789  
0.5553716 1.473792 0.8101504 1.708062 1.503313 1.646832 3.552819 3.51348  
2.621753 0.588209028 1.05747 2.00411 1.664108 0.7737142 0.7718073  
0.4821162 0.4404667 0.125941488 0.466565794 0.360150736 0.5947867  
1.099736 0.4028073 0.8231279 4.088794 3.507538854 1.445222 3.427119  
0.5155231 1.103266 0.8093252 0.388941252 1.425423 1.444107 1.413129  
1.743648 2.506101 5.664553 1.798562 3.20458496 1.565806 2.683423 0.904146742  
0.5755012 2.578941 2.324405 2.831637 1.459924 2.768931343 3.198096072  
0.249571525 0.07073589 2.99576 1.216065 0.6284342 1.997052 0.7105559  
2.585352619 1.379891 0.046426698 0.1933077 0.9521797 0.5974871  
2.467513 0.2618592 2.877572764 0.4860346 0.5318933 0.9174825  
1.045593 0.5981203 2.177451 3.220067 1.237718258 2.263578 1.595038397  
0.2449492 0.04609468 1.519979525 5.913002 0.5681235 0.3895232  
2.330106817 0.4242286 1.814829 5.634941 0.669395953 1.116065 0.6544805  
0.1668262 0.3268211 2.362329 2.256314 1.613669  
AL365361.1 0.004541367 1.481193133 0.506726 1.471538417 0.28428514 0.370877083  
0.4990378 5.606960016 0.1834376 0.4615129 1.96278739 3.130893  
0.2279728 0.8563464 0.4295986 0.8801889 0.4709438 0.259638015  
0.4613213 0.8605167 0.47836292 1.241748 1.254243014 0.8496552  
0.4129915 1.642158435 0.5120496 0.5990693 0.2097136 0.5591765  
0.2591615 0.60348729 1.315761 3.777633599 0.9758943 1.114891974  
1.165957053 1.658610927 1.461246 0.8270459 0.932085561 2.505998 0.734625225  
0.02685047 1.381054131 0.091058 1.070898 0.1514207 0.410454642 0.2733136  
1.129495 0.09144028 0.738477213 0.7502851 0.408986396 1.859247 0.3450016  
0.8171543 0.7777924 0.5411975 0.1908626 0.9265421 0.341426041  
0.961125 0.5429222 0.5933033 0.4060913 1.315659 0.8803808 0.9162168  
0.41642 1.673041743 0.4076924 0.5057886 1.132368581 0.7349649  
0.316472662 0.3656877 0.2579768 0 1.104049 0.8884222 1.336601  
0.40989131 0.912349383 0.1057818 2.420196 0.342425 2.25932109 1.163617

0.6609836 0.7690561 1.038680573 0.5991836 0.796596 0.261599531  
1.247786 0.364170813 0.625532476 0.499221 1.913613898 0.6666734 0.8514087  
0.245908428 1.158863 0.552785 6.196105412 0.6885688 1.151118932 3.469190016  
0.6480305 5.784379203 0.8667001 0.3228011 0.4481868 0.4264266  
1.490401 3.365827943 0.3555184 0.8090308 0.6727324 0.7083487  
0.9130588 0.5544377 0.6704103 0.3464972 0.551087 0.6689127 1.5106  
0.788501585 0.588746157 0.8465913 0.433328219 1.1279251 0.4894726  
1.08847231 0.9225527 0.270481 0.97507513 1.500586593 2.552674292  
2.392982997 0.235229 1.540743 0.3499418 3.416468 0.6252555 0.5737257  
0.701241861 1.295051 1.259113 0.84952319 2.506546 1.366369 0.989966418  
1.620456 0.5110874 1.48393584 0.3231131 0.6039737 1.54170847  
0.9999787 0.4075087 0.3148352 1.419284214 0.8866212 1.186161  
1.894174383 0.5052748 3.796891521 0.4153894 0.99299 0.349140619  
0.7852017 0.894509925 1.606841 1.758962 0.2836249 0.6263889 0.7199632  
1.413359493 0.8160816 0.8191626 0.5763396 1.26377 0.1637009  
1.164137 1.99845 0.6226472 1.201694862 0.647940657 7.588659 1.383173  
0.2034951 0.09476698 1.091966664 1.084942 1.29324623 1.611218 0.5483766  
1.01855611 1.090213266 0.2701935 0.3159849 1.162728603 1.261995  
0.5633888 0.1447751 1.444579 0.7606643 1.192061 3.196046 0.5075528  
0.3541983 1.422687 1.659129 1.029869 0.1732455 1.593576615 0.4028494  
0.6544925 3.061814942 0.5840673 0.5418946 1.240719 1.69413 0.1780473  
0.439463317 0.6662358 1.115553 0.2944931 0.04987483 0.4023259  
0.405823279 1.198423 0.1188017 1.568021 2.431468852 6.77203523 0.9922658  
0.9531763 2.942646 0.832777227 1.339839 0.8833655 1.479324238 0.7320485  
0.8030882 0.7191331 0.06910555 0.8508867 0.9069237 1.577058568  
1.690646 1.351334898 0.3400216 1.708958 0.787229 0.7578025 0.6757519  
0.6376494 0.2570644 0.900532977 1.160901 0.4758334 0.273420534  
0.1912588 1.030492 0.9064146 0.7880413 2.088261 1.210987 1.187723  
0.688081 0.560152877 0.4286573 1.298046108 0.2899681 1.235035 0.3506638  
2.439952217 0.442780053 1.449088 1.303625 1.59963 0.01336599 1.249173  
1.091788299 1.080105 4.243405 0.7811928 3.064217911 0.9623688 0.7645734  
0.866903133 1.335828 0.930296532 0.6881235 1.045509 1.187929675 0.6306396  
1.581817 2.06041937 0.603928608 0.9888848 0.8821769 0.3484848  
1.738926 1.565384 1.840291 0.9581893 0.1897147 0.4851706 0.898399986  
0.7934832 0.721621229 0.0872613 0.409466538 0.8819753 0.5328387  
0.796302745 0.2811877 0.6555623 0.4110066 1.232522516 2.988822  
4.861459 1.382066914 2.675275482 0.02721466 0.8237496 0.4959547  
1.385770472 0.581692914 2.105738251 0.2342702 0.5203126 3.418737  
2.392626 0.8201457 0.7384667 0.8769352 1.171403 0.8098384 0.8207107  
0.5189522 0.952955396 0.6288055 0.1446155 0.934529 0.717387 3.384955  
1.87149 0.4836093 1.57146 0.1362246 0.7008662 1.026204089 0.3694365  
1.044193 0.4710642 0.938483 3.156830898 0.09117169 3.236301 1.195195  
0.6139257 0.8256884 0.5046217 1.474983 0.783317719 0.8323158  
0.717442 0.473231675 1.214551 0.412156 0.9278411 0.8198728 1.314146

0.432196583 0.246419302 0.9976497 0.3294885 0.5205106 0.342586425  
1.816217082 0.217588402 2.40432 0.6938192 3.890243 0.1033132 1.115243  
0.4278839 0.9361448 3.33868877 1.890020018 0.5938767 0.933069953  
3.48087 0.481744694 0.8574407 1.153773 0.2854681 0.6328425 0.9775037  
0.8395215 1.773528 0.2667029 0.4236704 2.282278728 1.723496 2.802245  
1.016955 1.311522 1.313700371 0.7386319 0.4268085 1.63196 0.924216419  
0.8919687 0.4459787 0.5260321 0.3225241 1.114055 0.6934519  
0.2221593 0.834367014 0.364759627 1.842121158 0.4667796 1.227093899  
0.304307377 0.2380851 6.107151 3.608339706 0.4857727 1.119741 0.4237849  
4.223597254 0.2234981 0.2233375 1.049798 0.622212711 0.293013 0.2063689  
2.53651 2.174845 0.3236878 1.281775 1.204847 0.382258 0.9307337 0.2982434  
1.149016 0.834309156 0.06462019 0.03266924 0.2058447 0.7231113  
0.4675758 0.6400951 0.5943327 0.218930518 0.928788948 0.610921593  
0.5975775 1.098472 0.5404927 0.5192728 0.9301733 1.832776302  
2.768937 0.454616 0.8639666 1.278033 0.2356456 0.453243375 0.4454532  
0.2320754 0.5526113 0.2585437 0.1800562 2.849224 0.2521396  
1.081745473 0.245851 2.096785 2.086532441 0.7132048 1.037756 1.661873  
0.8412767 0.5472597 1.043536409 2.144468736 0.125954397 0.07933149  
1.683518 0.4113749 1.616442 1.340606 0.984172 0.714523687 0.5803391  
0.650854021 1.647664 2.269257 0.2871822 0.6153729 0.4405192 0.602185435  
0.3577193 0.9643857 1.088336 1.05272 0.3995218 0.437976 0.4672592  
1.222493654 1.038123 0.396723509 0.2575449 0.3554097 1.093569958  
0.4037052 0.95574 0.491464 0.67584154 0.5910074 0.7253679 0.950878  
0.607505748 1.238999 0.8581451 0.1442217 1.250802 0.6623478 1.278246  
0.4788314  
ATP1A1-AS1 1.009737 1.348491795 1.036564 1.3864853 0.777754538 1.122340348  
0.9166542 1.15606748 1.81848 1.045745 0.625590101 0.7127028 1.798754  
1.398798 1.908436 1.622823 1.16895 0.657984619 0.9863843 0.8100484  
1.639438082 0.5624786 1.469078083 1.244163 0.8595895 0.596310688  
1.549207 0.67251 1.243234 0.448246 0.7132701 1.071506368 0.816893 0.948496768  
1.531993 2.141727077 0.894410335 1.429528521 1.310845 1.405507 1.027339764  
1.822937 1.307132022 2.004483 0.523301096 4.40061 0.5022498 1.172276  
1.084661329 1.789098 1.247227 1.202472 1.530288843 1.052709 1.280344076  
2.409328 1.061866 1.512312 0.6358678 1.387353 0.4504967 1.10791 1.8106462  
1.436292 0.7951687 1.147239 0.9306216 1.760909 1.156814 0.6447893  
1.562269 1.336439332 1.063919 0.5683635 1.126729019 1.216417 0.275023264  
1.143134 2.186079 0.6751771 2.191247 1.10474 1.534431 1.117970735 1.706678806  
0.4660672 0.4896375 2.436821 0.850206611 1.413372 0.9249359 1.402669  
1.657432276 0.7150778 1.018959 0.435470814 1.792229 0.38202652 0.745999246  
1.372881 0.459929265 0.8045693 0.5749311 0.241098615 1.232452 0.6950535  
0.580504679 1.565504 2.198687354 0.686081219 1.615215 1.145934091 1.234592  
0.7596729 0.5606681 1.452629 0.7915104 1.074303759 1.293258 0.7935679  
0.5073648 1.722289 1.168297 1.7924 0.7546749 2.335763 0.5056404  
2.064793 1.382317 1.279291452 0.630180754 0.7595353 0.256461599 0.778373861

2.073687 1.869273017 1.216408 0.9467914 0.301152333 0.997881856 0.422345572  
1.038335565 0.9993885 1.011649 1.84824 0.8172302 1.30714 1.123378  
1.427232206 0.8742264 1.05309 0.691538753 2.32665 1.109947 0.997099656  
1.087047 1.428549 0.600439458 1.159938 2.475034 1.07151471 0.9399304  
0.959022 1.873771 0.885424827 2.162094 1.241927 0.787871438 2.558978 0.85638784  
0.8603466 1.230481 0.960236545 0.9256619 1.047544354 1.045016 0.9133771  
1.456044 1.490547 0.4736235 0.690939783 0.7415366 0.8437029 1.431943  
1.904355 1.41031 0.7041655 1.861157 1.729131 1.852377241 0.627837321  
0.6388874 1.79259 1.539748 2.105392 2.518622935 1.052778 1.142846639  
1.747617 0.7766065 0.891317927 1.026873293 0.3605701 0.3961433  
1.389830475 0.6959114 3.292783 0.5672479 0.4346004 1.10745 1.45917  
0.6227149 0.4037052 0.4868595 1.18243 1.740796 1.803924 1.279793  
1.395006488 1.926185 1.354681 1.225424626 0.5356145 1.405462 1.646288  
1.684379 1.484878 0.733007014 0.8854552 1.270616 2.177047 0.6886653 2.76194  
0.581648073 0.5884752 1.237103 1.077389 2.221769865 1.176002395 1.899231  
1.366615 0.5456435 1.179372469 0.8549864 0.9103132 1.413808533  
1.651349 1.841387 1.077949 0.8923142 1.692294 0.9294841 1.41992123  
1.077426 0.715333628 1.014665 1.844778 1.41643 1.328077 1.802711 1.414753  
0.9397637 0.40787505 0.9614808 0.7825605 0.780578246 0.6560812  
1.018522 1.043853 1.181666 0.4367114 1.927241 1.522211 1.266791 1.494714134  
1.693775 1.006535035 1.316188 1.91394 1.168488 1.326943182 0.338952206  
6.050778 2.186494 1.547431 0.6246508 1.168849 0.719774325 1.882629 6.297163  
0.6689371 1.272268648 1.475978 0.4732693 0.964622453 1.506794 1.460877555  
0.347241 1.670635 1.168289259 0.8870312 1.895517 1.22365624 1.684105835  
1.313697 2.103526 2.174162 1.01606 0.8210681 1.557367 1.511803 0.5671974  
0.8143346 1.357127355 1.190702 1.225075569 0.5715518 1.200223463  
1.452543 1.322284 0.819079098 0.3712181 0.7358446 0.8351357 0.289536017  
0.70923 0.6092707 1.06373486 1.812932767 1.451718 1.21565 1.228115  
0.649253775 1.31155859 1.378295249 0.6421386 1.585856 0.409592 0.3356234  
1.350036 1.080838 0.7300917 0.4730548 1.090667 0.6687113 0.7696573  
1.665872794 0.8465336 0.5879839 1.952588 1.527214 10.31434 2.848179  
1.123701 1.112745 1.912179 0.9043334 1.963355171 2.007158 0.7593722  
1.554674 1.063258 0.755285317 0.2979614 0.8550216 1.628953 0.5326831  
1.246432 1.509429 2.088859 0.837100502 0.5022368 1.064418 0.824000318  
1.753764 2.383409 0.8860122 1.05721 1.51375 1.805616397 0.875615145  
0.9068612 1.65909 0.8696631 0.709783053 1.927141429 0.952454242  
1.381826 2.476105 1.413174 0.7388721 0.5544695 0.8469749 1.150396  
1.401501776 0.576860189 0.7336762 1.714482762 5.646293 1.082178543  
2.901233 0.8081016 2.425666 1.222127 1.334447 1.475905 1.519312 1.197593  
0.9257122 1.092556035 1.720184 0.6794348 0.6500031 1.182718 1.458444776  
2.130204 1.573329 1.166936 1.03905743 0.715236 1.941559 1.169308 1.488141  
1.445739 1.44887 1.165945 0.771672759 0.686579948 1.557771047 0.8086625  
0.952518318 1.202510949 1.737744 0.5405562 0.910389313 0.9566132  
0.8749067 0.6060448 1.170966751 0.9185176 2.033285 1.755804 0.499896039

1.363449 0.909985 0.9343162 0.6082996 1.487803 0.3490845 0.7771243  
0.5145512 1.118602 0.6079566 1.253269 0.927373061 2.788504 0.8975587  
2.021175 1.777483 1.072617 1.328779 0.9018098 2.035312825 1.525304437  
0.79367962 1.417035 1.246337 1.810783 1.190632 1.375635 0.941682985 1.66271  
1.433971 0.6187497 1.152828 0.4820391 0.67083663 0.9315314 0.7412407  
1.890062 1.70425 1.598378 1.045496 1.34122 1.012934846 0.3357374 0.8733679  
0.800869043 1.668157 1.223138 1.671571 1.325507 1.014463 2.041857542 1.407567336  
0.346841468 1.853752 1.681747 1.411852 1.030679 1.08271 1.038279 0.799256518  
0.9948972 0.589909935 0.8750281 1.543838 1.042182 1.933771 0.5510761  
0.505062358 1.411241 1.027836 1.828533 1.226651 0.6286662 0.441699 2.310443  
1.636344287 1.206961 0.725280065 0.8388861 0.9059911 0.950859353  
3.941085 1.721967 1.324347 1.24425782 0.8948842 1.832203 2.575853 0.433669735  
1.28755 0.6496877 0.3753703 0.4347333 2.075927 0.6688692 1.212068  
ZNF436-AS1 0.2203067 0.992906742 0.4060064 1.322983111 1.880589277  
0.957166516 0.9846801 0.899041675 0.2886085 0.6050947 0.447813055  
2.044362 1.126204 2.290186 1.808334 1.398984 1.885576 0.991381958 0.658212  
1.752079 0.978411626 1.400619 1.693909153 2.341547 1.312673 1.067325008 1.37831  
0.2777798 1.131803 0.6432288 0.2820894 1.163239266 1.433472 1.894887647  
0.6397529 1.328022743 2.472555221 1.038006308 3.357367 1.573855 1.277364918  
3.010903 0.672987866 0.8499238 1.435249343 3.805466 3.336938 2.501469  
0.88767281 0.676873 1.69319 5.663298 3.438625025 0.8379728 0.818451138  
1.465794 0.9348267 2.861072 0.6443106 0.8802261 0.3429242 1.610183  
3.771668101 0.6416672 0.9430245 1.428619 0.7599239 1.405904 2.183607  
0.4127035 0.2873542 1.178557852 0.5165122 0.8289313 0.938261616  
0.6385438 0.240471272 2.414827 0.6376586 1.26024 0.5071643 0.5208546  
1.053788 1.340215263 2.535211652 0.8706754 0.395992 2.28407 0.684976049  
1.205649 0.3146667 0.7027671 1.086903093 0.7238078 1.847398 1.672809165  
1.077735 1.450089212 0.857141493 0.4338192 0.792648078 0.6232591  
1.996018 0.508420929 1.519399 0.548652 0.646475513 1.629902 2.37609313  
1.151926184 0.702369 1.467081735 0.6113643 6.53514 3.447386 1.3524  
1.400028 2.056044897 4.98113 1.434593 0.7097969 0.3972253 0.6248134  
1.253327 1.262129 0.7087023 0.9515091 2.77285 4.052541 2.057589357  
1.66499543 1.220392 2.535437182 3.095527774 0.641753 2.001232103 1.640565  
0.5620561 0.353608806 1.94177355 0.572546974 0.955393963 0.5698906  
0.6978475 1.057968 2.355753 1.418349 0.6410207 1.220850585 2.167724  
1.519249 0.964725372 2.298749 1.18673 0.632194072 1.874332 0.8052865  
1.271591688 1.113279 1.29733 0.858674216 1.862202 2.152871 0.5381867  
1.890756334 0.764612 1.488728 0.694677785 0.5615651 0.853832199 2.478029  
0.5037191 0.490933315 0.5230905 3.217687269 1.68178 4.043529 0.6798135  
0.3743182 0.9439517 2.011340773 0.9957558 0.8170722 2.134366  
1.779377 0.4739746 0.807135 2.014983 1.505163 0.872615346 0.32043381  
2.471551 0.75618 1.913371 0.7843283 1.347746912 1.966885 1.903581814  
1.141719 2.656241 0.645794978 0.923710045 0.585881 0.719916 0.622373894  
1.317835 0.5334805 1.36035 0.9617224 1.141786 1.09647 0.7953699

0.738385 0.5736624 4.479602 2.61989 0.7106697 0.4113149 0.803598464  
0.5020328 0.9901297 0.509069876 1.223988 0.4750329 2.000426 1.133417  
0.7470072 2.63124592 2.8893 1.014981 1.498119 0.5640013 0.9655822  
0.378225123 0.323728 3.472581 0.3768133 1.259933921 0.863486193 1.367573  
0.7952764 1.237634 0.861283611 1.826112 1.414471 3.450748154 1.823614  
2.464018 0.5265341 0.5329709 0.9022396 1.189078 1.266636811 0.7758189  
0.473040102 1.094613 3.12592 1.218269 0.4843621 1.277468 0.3715685  
0.9170624 1.33493422 2.228746 1.056555 0.352794467 1.287243 0.4691285  
0.8815131 1.599196 2.312356 1.304775 1.169689 3.913078 2.527960105 0.471817  
0.920690628 1.384247 1.253979 1.189965 3.22399231 2.094628883 1.488594  
5.820724 1.613302 0.4556318 0.6141767 0.715727885 0.7625355 2.04195  
0.6788505 2.447041091 0.573032 0.643952 0.877825424 0.854201 0.81314808  
1.073315 0.9825933 1.571929164 0.6749703 0.5269445 0.52285911  
1.746896359 0.7802174 0.5003106 1.086687 0.7652896 1.52029 1.377076  
1.749535 1.155245 0.4240751 1.138638797 0.7371979 0.622914999 0.7508108  
1.473233095 1.637105 0.5768346 0.648404645 2.874363 0.5539096 0.8200276  
0.819474949 0.3632285 0.3321705 0.551491435 1.06534052 0.2913984  
1.705838 0.9430551 2.800483519 2.498728246 2.405116164 1.179076 0.533886  
0.3597543 1.119444 0.5236861 1.287861 1.080077 0.6959273 1.207524  
0.8844189 0.5625387 0.761371655 0.829523 2.88692 2.959634 0.3458885  
3.02813 0.8423256 0.9947614 0.7188615 1.129417 0.7623578 1.164346947  
1.646866 0.7122774 1.041894 0.5769021 2.909982763 1.590751 4.585455  
1.021765 1.292415 1.778507 0.5564987 0.5980581 3.18816185 0.488694  
1.104886 0.356001242 0.1873425 2.67189 2.224462 0.9391619 1.770986  
1.067205415 1.521427618 1.162017 1.359988 1.292049 0.449168868 1.489188266  
2.264970724 1.016091 1.291737 0.7837262 1.490006 1.011101 0.7968798  
0.616942 2.048701377 4.133604126 0.8117719 1.316271677 3.236743 1.132561473  
2.847525 2.17043 1.304635 1.659454 1.023753 0.4048574 1.900784 0.503194  
0.4999311 1.58747546 3.163572 0.3431024 0.5545752 2.359563 2.354244953  
0.5567483 0.60074 1.656256 1.153288773 0.8757676 0.860849 0.628575  
0.6479382 0.8386237 0.9703489 1.353574 2.20277937 2.590973307  
1.529063638 0.6119999 1.063595475 0.579165654 1.816908 0.544346 1.750897205  
1.952161 0.4859934 0.822549 0.996182962 0.4079449 0.3513844 0.8657005  
1.223684998 0.9408308 1.617286 0.5426337 0.5845499 0.7594359  
1.523575 0.677754 0.7790663 1.550105 0.651717 1.057349 0.432461025 0.8123561  
1.33639 1.073544 0.5553035 1.489544 0.5108392 0.5667172 0.564825043  
0.554560162 0.979718522 0.5830627 1.330728 0.5975896 1.469716 2.371618  
1.919448244 1.621072 2.262289 0.3144152 0.2988408 0.8296081 0.634464995  
1.430076 4.156289 0.87491 3.272693 1.381895 1.925377 1.620663 0.643267466  
0.4144345 0.7438792 0.632784839 0.4781234 1.562511 1.253223 3.055951  
1.405869 1.440898046 2.280471147 0.376152698 0.1820217 1.789557 0.6851306  
0.2661725 1.588268 0.7783946 1.228727609 0.8543316 1.211745552  
0.5827045 1.086549 0.6118576 1.360617 0.4909341 2.843848324 0.6365131  
0.8277368 0.8885877 0.7221469 1.636121 1.722706 0.8358748 1.204703961

0.7845609 0.728208041 0.6303174 0.8557117 1.254567757 6.238711  
1.343582 0.8233538 0.772879035 0.3557608 2.966671 1.17638 0.913069615  
1.142116 0.7359299 0.4190658 0.8289809 0.8684115 1.210073 0.7513841  
AL035661.1 44.48213 2.016299365 0.3569171 0.036552199 0.15727854 0.831538635  
0.2706217 0.070969377 1.395425 0.01652125 0.013857152 0.1380693  
13.10566 0.1924678 0.1100797 0.03790001 0.09245181 0 0.04128598  
0.0462072 0.029111562 0.1111303 2.238219376 0.06275141 0.1332825  
0.726032587 0.0826255 0 0.07420038 0.2889306 0.3719741 0.05481524  
0.06883049 0.01787668 0.02801399 0.181928378 0.080632082 0.505891973  
0.214453 0.3595088 0.26950126 0.2082001 0.257923992 54.35482 0.154600252  
21.5252 0.126957 0 0.012875717 0.03696211 0.03605103 0.09274581  
0.016522516 0.2959434 1.326350446 0 0.04199128 1.822465 0.01075769  
0.04169046 0 0.02659728 0.066312903 0.08970988 0 0.01735887  
0.06740005 0.1272734 0.01380851 0.06841458 0 0.05840289 0.236957  
0.200743 0.21775215 0 0.19697179 0 19.72745 61.60738 0.1226072  
0.08791283 0.4188659 1.278026277 0.14502151 0.6973984 0.4716023  
0.1041942 0.153391651 0.02652204 0 0.01181873 0.029676344 0.02048556  
0.07819057 0.013964973 0.08997162 1.395398614 0.071556028 0.05298997  
0.015203149 0.405715 0.06862765 1.726749401 0.121594 0.09431955 0.090382113  
0.05662701 0.359247355 0.43723752 1.051652 0.253250289 0 0.0288891  
0.2954807 0.03506877 0.08295807 0.32975008 0.02121143 0.06053471  
0.0121125 16.1654 0.2071528 0.1628886 0.07845947 102.4601 0.07085346  
0.07312775 0.1767886 0.186351688 0.052077202 0.5259967 0.019679777  
0.24722659 0.03786567 0.038069409 0.04839954 11.21182 0.094691169  
0.158818545 0.680589215 1.04020652 4.683576 0.1420673 0.01252722  
0.2194878 0.06039834 0.03036089 0.069959387 0.0919479 0.02776282  
0.020353988 0.1185544 0.02110473 0.038952177 0.444882 0 0.370905205  
0.548751 0.527876 0.012377731 0.1077086 0 0 0.124976826 0.0288539  
0.3239106 1.42411982 0.09163706 0.283082479 0.189594 0.2697769  
0.138570823 0.1291479 0.017447715 0.2937805 0.07136303 0.06742368  
0.4149107 0.05653489 0.214265552 0 0.09540954 0.123067 0.1704875  
65.75108 0.09606165 0.03304863 0.1628181 0 56.70871368 0.5883062  
0.5590978 5.572813 0.036045 0.032469101 0.2649189 0.052468416 0.08501734  
1.228288 0.055509766 0.046943434 0.2371596 0 0.324586055 0.01699132  
0.176872 0.07342106 0.1594264 0.09734189 0.04217723 0.2229944  
0.5077472 0.04226534 0.08357138 0.2763751 0.508542 16.88327 0.106571125  
0.03641 0 0.050633636 0.160241 21.20555 0.08502926 0.4590027 0  
0.074289618 0.06237673 0.03623957 0 137.0589 0.02074933 0.089266419  
0.09162309 0.08505732 0.01286044 0.068001394 0.174259337 0.03091432  
2.804476 0.1025824 0.031478277 0.3545136 0.1830082 2.305898798  
0.01591072 0.06649422 0.142091 0 0.0848887 0.1633983 0.127118531  
0.06052181 0.379251556 0 0.3454595 0.8835513 0.09607775 0.0717279  
0.097013 0.01819079 0.049372445 0.1261581 0.5838231 0.145265092  
0.05173053 0.1197631 0.0909253 0 0.03292346 0.01824173 0.01635312



0.03925716 0.161474323 0.08051434 0.064749778 0.1357422 0.03795964  
16.27192 0.101307126 0.01820683 83.95913 0.09139893 0.04492989 9.516891  
0.04072525 0.210019621 0.0210678 0.206042 0.1658399 0.190716153  
8.107245 0.1078495 0.22374542 0.6275328 0 0.01203359 0 0.050203759  
0.03916185 0.2468309 12.94350524 1.307196746 0.6390818 0.03745558  
0.01432947 0.2775136 0.1008085 1.188228 0.02935177 0.05131289  
0.2551617 0.182245358 0.1918757 0.054553349 56.00844 0.246290061  
14.02159 0.9519788 0 0.1160145 1.640141 0 0.44435535 0.1783232  
0.07272666 0.039180724 0.233249693 95.67272 0.09370213 0.04412593  
0.269486235 0.023289394 0.233322984 0.04599 0.01720896 0.06769615  
0.1481755 0.04861491 0.01075134 0.3072665 0.04177011 0.07247654  
0.1710469 0.04973494 3.035605989 0.0354324 0.02838973 0.02002546  
0.0563326 0.7808551 0.5524641 0.02643488 0.2758667 0.0487657  
0.06318869 0.105086383 0.04087757 0.1073413 0.1620331 0.1310788  
1.131047365 0.06402004 0.08275228 0.2622128 0.05262177 0.06902283  
0.02870055 0.08104968 0.160849987 0.04404517 0.01155056 0.035408965  
0.03623211 0 0.1935953 0.05252074 0.06683108 0.021918361 0.218127296  
0.635375 0 53.97467 0.019304315 0.100177228 0.160505452 0.1420571  
0.0140745 0.02933669 5.187017 0.3249092 0.01479522 0.5124342  
0.364521998 0.495777044 0.07689648 0.017969464 0.3380331 0.050547181 0  
0.1144805 0.3226346 0.1750576 0.05359243 14.54414 0.4117257  
0.4552498 0.01841654 0.179320428 0.4744851 0.04976709 0.2464584  
0.3221226 0.060261855 0.03639729 0.01909863 0.009755952 0.296024784  
0.07435921 0.02513034 0.6280942 15.05321 0.01288928 0.2270914  
0.03976431 0.293607207 0.36528431 0.403256512 0.110317 0.015622765  
0.164282565 0.01857572 0.2445136 0.093145893 0.0087463 0.05874456 0  
0.5269876 0.1466812 1.262075 0.1011788 0.018204701 0.3275226 0  
0.3740633 1.224272 0.01727943 0 0.3266864 0.1266794 0.1224677  
0.05500027 0.5428981 0.088558003 26.37134 7.853154 17.96931 0.09429884  
0.0117583 0.4718036 0 0 0.132683046 0.04608922 0.09866896  
0.1563727 0.01227335 0.05016064 0 0.170025326 10.90719 0.0314391  
0.05997503 0.2724665 0.02655666 0 0.07600594 0.01502482 0.03172648  
0.02860745 66.88156 0.1942792 0.0748506 0.269800813 0.08015177  
0.01876519 0.029668075 0.009819741 0.5704263 0.02203399 0.03324498  
0.02707674 0.015339643 0.032872839 0 3.153188 0.1321977 0.01127698  
0.1631751 2.76864 0.3758493 0 0.04647038 0.099021978 0.6926635  
0.01692394 80.53958 0.04431897 0.06702129 0.017789798 1.166228 0  
0.2558982 0.05406327 0.2401339 0.08076893 0.0602454 0.095995949  
0.04138209 0.252406821 0.0783666 0.1573021 1.198896635 0.08189382  
0.03231285 0.7892613 0.03427454 0.06786175 0.04941432 0.1038643  
0.090172587 0.01286712 0.1313807 20.70862 0.04182396 0.03303956  
0.2505095 0.01147247  
AC004585.1 0 0.291239156 0.2862964 0.471212161 0.750945951 0.272248089  
1.320831 1.57227383 0.1599031 0.1893186 1.984880903 2.888622 0.04731538

0.4948255 0.197096 1.363219 0.4708508 0.357358729 0.2496917 0.6324498  
0.514288055 1.074476 2.164733042 1.342273 0.7272846 2.100311102 0.1578023  
0.3608771 0.02834232 0.8123929 0 0.54961658 0.9311459 1.894868357  
0.3745175 0.970832569 2.168765204 2.58797587 0.9693227 3.268253  
3.946086342 3.193474 1.012558592 0.02229107 1.476316261 0.03307313  
2.040779 0.6746351 0.196725485 0.2823683 0.5967178 0.3542611  
0.583777188 0.5046494 0.422188345 0.8474307 0.2004926 0.7285047  
0.2362741 0.09952814 0.2670223 0.2031873 0.126647681 0.2227321  
0.1618006 0.4475633 0.3432639 2.044024 0.5142575 0.1959923  
0.3184162 0.706424716 0.09317253 0.1597454 3.119054163 0.3259103  
0.31348877 0.375787 0.03686543 0.04468699 0.9600613 0.9444392  
1.651553 0.426411487 0.731990279 0.1878357 2.702069 0.2114324 2.463485275  
0.1899492 0.8231161 0.586872 0.750975001 0.07824869 0.4355524  
0.800130013 0.979444 0.705441625 1.093290094 0.2024058 0.929143347  
0.7916994 0.8191781 0.027481933 1.23854 0.345261 2.416627594 0.4542261  
3.567764053 2.397809307 0.3765933 5.172581962 0.4123614 0.7724339  
0.1736381 0.5023206 2.231327 4.315798058 0.3848511 0.6551358  
0.5320601 0.06199494 1.023985 1.033273 1.061408 0.08054469 0.3608519  
0.8496167 1.78949 1.935226506 0.596757786 0.3219791 0.939635418  
1.819226439 0.09642365 0.836128783 0.8781405 0.08897322 0.874088546  
2.748833491 5.127080168 4.966595404 0.05943473 0.4341236 0.4665398  
1.143242 0.1153517 0.159458 0.178149223 0.6271667 0.7423195 0.524786298  
7.981341 0.1511507 0.818320853 1.864527 0.1432947 4.912414232 0.371178  
0.877476 0.86284565 0.8742556 0.4179135 0.03473959 2.824462364  
1.322559 1.988423 0.590157191 0.5153161 1.334717346 1.689782 1.099165  
0.529298902 0.6659636 0.433192689 1.743345 4.315934 0.2704151 0.3219195  
1.862537 1.82685273 0.2330148 0.4897106 0.1762796 1.284333 0  
0.9173166 0.6311791 0.07067231 0.550619919 0.198179547 6.975537  
2.476686 0.08447012 0.1548912 0.558099932 0.5059552 1.24256422  
0.9877529 0.3540899 0.441730473 0.298849685 0.2113716 0.1806196  
1.518780958 3.666948 1.299227 1.360165 1.196173 0.9708549 0.2416565  
3.123162 0.1818227 0.3127917 1.292831 3.008659 2.060601 0.0544211  
2.022627437 0.2897401 0.2507793 2.175809327 0.7790015 0.2471709  
0.2273504 4.130258 0.05748308 0.865480247 0.8339113 1.049717 0.2053684  
0 0.3764669 0.312556654 2.152332 0.3045876 2.394747 1.181839248  
3.494496094 0.5313753 0.2288943 3.344583 0.495979938 2.462064 1.507297  
1.252612045 0.4709998 0.3651077 0.7869801 0.1653633 0.8781753  
0.9882099 2.791938885 1.199221 1.334261692 0.1852486 3.073166 0.2624923  
0.2293676 0.7534423 0.504374 0.104225 2.628443917 0.5270629 0.468306  
0.113495931 0.1358466 0.3846814 0.7524992 0.3619893 2.059283  
0.8012963 0.09369603 0.1749423 0.668182008 0.3229176 0.630677971  
0.3672669 0.4229004 0.05993621 1.547851114 1.008396959 0.4340805  
1.58848 1.001109 0.5437214 0.4666747 0.638123057 0.2212999 1.541245  
1.266917 1.962844565 0.3785428 0.2648268 1.810487936 0.4630543

0.330996787 0.7813998 1.182903 1.150579632 0.4362939 0.5571209  
1.35188322 0.398000625 0.5085626 0.2503708 0.2326206 1.678363  
0.9867112 10.44678 0.4391169 0.1224999 0.3828947 0.362563804  
0.5191429 0.195353812 0.03169413 0.06917309 0.01439739 0.1988587  
1.010764336 0.6370145 0.5785105 0.242312 1.32389705 0.8049848  
1.972337 1.172325623 2.383274495 0.105436 0.9283394 0.7079007 1.044494031  
1.034142387 6.804150045 0.04391699 0.2464989 0.1077412 2.650701  
0.6344558 0.1334674 2.146572 0.824338 0.5536772 0.4464543 0.2374656  
0.519183702 0.3721881 0.4066509 0.1529825 0.3496571 1.171748  
2.313155 0.4627944 0.3386983 0.0116419 0.6335747 1.476572704  
0.1756575 1.06603 0.05951131 0.5900892 3.913279938 0.937393 2.876408  
2.144675 0.2386867 0.448199 0.3425858 0.2708872 0.51665338 0.2944188  
0.1544188 0.394483847 0.6746794 1.03126 0.6162299 1.667599 0.8509155  
0.439538153 0.247350527 1.631444 0.3900466 1.002626 0.350249236 0.494252257  
0.51728844 2.821601 0.5107235 0.4622366 0.1350876 0.5860541  
0.2966947 0.9354957 3.34470166 2.177777225 0.312079 0.909452858  
0.9683887 0.313746944 0.5967533 1.002103 0.2606931 0.1044793  
0.7079449 0.4486212 3.25767 0.3780255 0.1055185 2.475160769  
1.335446 1.093048 1.63437 0.8544523 0.863183172 0.2346076 0.2006153  
0.1956402 1.86098608 0.4733831 0.3839614 0.1934783 0.1058073  
0.5169484 0.7951359 1.556849 2.88619085 0.630557557 1.617334632  
0.2896973 0.134267101 0.61324844 0.1419074 1.34258 6.359734106  
0.1670412 1.256565 0.2655921 5.048569016 0.2037374 0.1297893  
0.5935113 0.608444247 0.1390042 0.1362821 0.797752 1.453461 0.08250279  
0.6548436 0.6123678 0.2199442 1.257185 0.03939085 1.067959 0.56377493  
0 0.09492623 0.01329151 0.8104348 0.4379035 0.3119102 0.2467055  
0.184686149 1.064299668 0.088023485 0.2153633 0.503969 0.187522 0.8142939  
0.4388281 1.802211685 0.07547499 0.3752747 0.381811 1.773989 0.3803943  
0.316866996 0.1330633 0.6886835 0.5756317 0.2731797 0.1403667  
3.223446 0.5718136 0.858798359 0.9822495 0.7705321 0.594946437  
0.1594109 0.7781632 0.420816 0.5396898 0.1939219 0.219723104  
1.287034741 0.345650312 0.07203488 1.304469 0.09691801 1.524809 2.409183  
1.285122 0.812416077 0.3106301 1.134702594 0.9921624 0.355544 0.0695382  
0.1904458 0.2453345 0.254818812 0.3712201 0.6355488 0.8912081  
0.4388241 0.9888986 0.6748723 0.2301193 1.615664704 0.4346847  
0.29342728 0.4365329 0.9388231 0.66588576 0.4535742 0.987403  
0.1586706 0.894609353 0.4752211 0.5662435 0.7792917 0.473594255  
0.5406339 0.3136467 0.1925418 0.465952 0.7572071 1.107956 0.05477674  
AC010883.1 0.8738365 1.412371685 0.6155476 2.679147644 2.995010187  
1.12678559 0.6050079 0.979163429 0.1604388 0.7598115 0.398306084  
1.839999 0.7477137 1.19156 2.729036 2.614529 1.771606 0.63743273 0.6329133  
0.6198111 0.753097082 1.078076 5.443709438 1.731561 1.915518 0.613790482  
0.7464173 0.3833853 0.1279677 3.321976 0.2138384 0.47267815  
1.285989 2.055369 1.006533 2.307043278 2.935710122 2.977487191 2.260198

3.678769 0.885310672 2.580792 0.288310347 1.107105 1.817912509 2.588347  
2.311171 3.001883 0.962249593 0.5312142 1.51982 3.427534 2.184625375  
1.822824 0.470669679 2.444525 1.247219 5.360265 0.4947456 2.097093 0.1854809  
4.548804 4.892270495 0.2578595 0.7711277 0.6985419 0.7426424  
2.727105 1.587632 0.4424601 0.5111727 2.098395289 0.6410377 0.2404209  
1.435889729 0.4388713 1.069432544 1.404171 0.4438672 1.008826 0.775321  
0.3158677 1.126301 0.752408278 4.525753831 0.2569977 1.286044 3.144674  
1.322713933 0.6861078 0.172057 0.3057428 2.772277583 1.001013 1.985281  
1.003513144 0.7758357 2.12341474 0.246814359 0.3553967 1.00508856  
0.2535165 0.7890456 0.248165994 2.718383 1.039253 0.155875082 3.027468  
4.027180906 1.328599407 0.1889275 1.819838763 0.9309213 7.307346  
4.181275 1.41121 0.7948411 0.892069976 2.987507 3.856984 1.009659 0.7091099  
0.4903576 0.8360759 1.954521 0.7879416 1.086182 1.681571 7.723974  
6.628595103 1.526830285 0.6590378 2.43238085 1.212236084 0.6167601  
0.984830734 1.066573 0.2678139 0.680444081 7.361119829 0.403674037  
1.02287433 0.4472538 0.8983794 1.980435 2.294143 2.517306 1.74537  
1.173020872 0.6796091 2.753123 0.87757396 2.66936 0.7279541 0.783741283  
1.172193 0.2744791 1.158825525 1.643036 2.023083 0.675985843 1.315777  
1.205526 0.7319753 0.997860757 1.161116 1.817744 0.463409427 0.7023973  
0.915394849 1.544064 0.1550879 1.283424236 2.375803 4.012097732 4.403122  
5.196471 1.124044 1.341684 0.7312604 1.407723141 0.3300642 0.8227275  
1.901354 1.415684 0.6562259 0.1725731 0.9499404 2.680363 1.455272452 0  
5.21395 0.9820891 3.508779 0.984264 1.399924035 3.397352 1.990741363  
3.747029 4.263314 0.292518803 0.85457494 0.409011 0.4983679 1.026279124  
0.9767874 1.095006 0.8863656 1.080162 0.7772133 3.111648 0.9970624  
0.3648636 0.3340873 3.026712 3.124658 0.6321032 0.3685731 1.187009541  
3.383873 2.20167 0.824726089 0.7536965 0.6337751 1.319791 2.080505  
0.5536862 2.861382219 3.585879 0.6944399 1.751479 0.8179066 1.013902  
0.812518794 2.264886 3.911782 0.4435883 2.34553551 0.250443068 2.073382  
0.4478393 3.959548 1.040523161 1.482187 1.972626 0.873151099 2.378133  
3.965929 0.1633689 4.337553 0.6100043 0.9393352 2.146642327 1.261226  
0.91798737 1.327637 4.390012 2.765402 0.6351753 3.436211 0.8365543  
2.823503 1.028882062 1.858455 4.161749 0.493463326 1.301062 0.1564744  
1.088971 1.038927 2.507808 0.5767687 0.8460893 7.259352 1.856549005  
0.2314281 0.744459758 2.015897 2.109463 0.541233 2.412753204 1.779328753 0  
1.313573 1.764984 3.273258 0.3511786 0.60367449 0.4541753 3.948276  
0.198619 2.558216006 0.2940472 0.4871423 0.981615716 0.2869623  
0.387456596 2.144519 2.508603 3.655708205 1.57592 0.9997273 0 1.633638931  
0.7653995 0.5024192 1.729905 1.329462 0.8330629 3.140607 4.021537  
3.576689 1.100145 1.527869378 0.3676815 0.235209916 0.810908 0.999429487  
1.300106 0.5558193 1.319617493 1.04209 0.3397748 0.1562939 0.613076407  
0.186388 0.4598956 0.150159959 1.072714167 0.1586838 0.7406706 1.21761  
1.640337142 2.142156079 4.43665412 0.3304809 0.6430442 0.1945839  
0.1135764 0.4657911 1.267037 0.6042934 1.440754 1.38883 0.2622146

0.5360877 0.586038387 1.459791 0.6936225 1.093652 0.5262427 2.885744  
0.6107643 0.5065579 0.5663882 2.242732 1.225988 3.840443354 3.289925  
1.66611 0.8956602 0.3498572 4.052034226 1.4108 4.376639 1.704011  
0.3403227 2.142691 0.3299842 0.2912086 3.824834865 0.5697099  
0.498009 0.407114127 0.7290119 1.602138 1.34479 0.8303028 1.344682  
0.693016724 1.214771736 1.785719 2.668318 0.6905487 0.221951116 1.247768626  
4.786530683 0.5308225 3.034152 0.3372983 0.993961 1.193329 0.6804312  
0.823106 2.687762372 2.351328513 0.8841163 2.169338675 2.375103 0.653811278  
1.302287 3.400283 0.6776948 3.89965 2.053927 0.7033189 2.324639 0.5120441  
0.7411038 2.10859197 3.58907 0.7152456 0.5509879 0.6172667  
2.88691636 0.4969419 0.5489656 0.9253937 1.063606636 2.52921  
0.5056376 0.9900451 0.500477 0.9632632 0.4079657 6.514953 2.581452192  
7.228591023 4.578481223 0.1981826 1.571697244 0.386352967 1.81538  
0.5271173 2.208821451 1.055885 0.5065611 0.3997229 1.563621498  
0.6515886 2.120793 0.4985579 0.784906182 0.4707109 1.517799 0.4659187  
1.331519 1.092685 1.724723 1.217246 0.231715 3.256165 1.778526 1.154763 0.890920206  
0.3324607 0.9143447 0.7201461 4.110924 0.2703819 0.9040926  
0.3712979 2.439847364 0.915312995 0.353273486 0.3646431 2.30355  
0.5644507 5.334672 1.020691 1.515019637 0.454367 4.653934 0.3447811  
0.4271836 0.3053349 0.178834797 0.4005271 4.275505 1.489497 1.480112  
0.5377412 4.36274 4.625692 0.82720839 0.4223743 1.078763 0.596939558  
0.2258047 1.405386 1.108343 4.204572 1.556572 1.940040912 2.456707814  
0.367208756 0.4770229 1.361615 0.3565565 0.3350184 2.119021 0.4530419  
1.720846337 1.157634 0.683102366 0.4266369 2.432285 0.418627 1.114655  
0.2889662 2.147648801 0.9684057 0.6521706 1.038419 0.5827423  
1.725585 2.727879 1.039006 0.724311141 2.022108 0.662423144 0.488052 0.5086629  
1.441725151 7.532585 2.739935 1.253717 1.050856237 0.5201597 2.319907  
3.070744 0.345586062 0.6657281 0.6136601 0.5454686 0.8415234  
0.9021958 1.17483 0.6595229  
AL928654.2 0.9236425 3.310454764 1.394688 3.241892602 1.768941781 1.710166649  
1.120867 1.240640404 1.004455 0.1698904 0.641228042 1.516591 1.433018  
4.377021 2.299305 4.384477 1.505268 0.391949507 0.6722037 1.108696 0.748396101  
3.606866 2.581915985 6.839989 3.03482 1.921371103 1.911713 0.628637 0.2670547  
1.815682 1.683028 0.81028011 1.710502 2.343813481 2.304575 4.346849723  
3.005674119 2.074671373 2.352268 3.216287 1.649595728 4.817143 0.368370845  
2.460434 1.445251792 4.986091 3.753363 1.105518 0.99302162 0.5701302  
2.842172 5.313576 3.822827597 1.575958 1.178683798 4.562795 0.2878683  
3.668232 0.3595244 2.465077 0.5529693 3.999992 3.125399129 1.01475  
0.6533837 3.570076 0.8374772 2.29035 4.508339 0.5716076 1.142959  
5.580253948 0.2866663 0.08601124 1.679382871 0.7850372 0.393845217  
1.604717 1.091714 2.766978 0.8195119 0.7345167 1.181023 0.554186242  
3.674933522 0.3217958 0.3730427 2.444231 1.899988267 1.261376 0.4001002  
0.3646012 3.433119551 2.211888 1.440581 1.077028939 0.4163361 3.270747948  
0.699030032 0.5903122 0.117252149 0.3627849 0.8380284 1.47970136

4.411024 0.3233006 1.022353722 3.639399 4.571563874 1.830586465 0.405536  
3.689297099 1.903084 6.127087 4.849868 0.6310802 1.954952 3.341002527  
2.999153 4.357411 0.4670796 0.3004177 0.7518291 2.004027 3.059155  
2.602046 1.639342 3.039266 3.1814 4.191866067 2.597259748 0.3467244  
2.98495778 2.317949446 0.6489637 4.991284453 1.576048 0.4790558  
0.365146172 3.266308584 0.277722155 1.477819127 1.040041 1.387854 1.80347  
1.590176 6.249667 7.688059 3.057461015 1.249429 2.605089 1.936053053 1.93026  
2.495765 0.801101844 7.116334 1.052097 1.741206964 2.821444 1.256534 0.540948576  
2.63051 2.718942 1.309331 2.53461117 3.041266 2.973947 0.172693775 0.2355793  
2.501622129 2.721349 0.7397749 1.306198677 0.9960354 8.208346241  
1.996009 5.53435 0.9013258 1.46664 0.4360174 1.022971844 1.69742  
0.2452776 9.412274 3.652392 2.934583 0.1543462 5.352541 9.703229 3.868553846  
0.266763031 4.411194 1.077991 9.18716 1.343628 3.088431661 1.833596 4.80190947  
3.241994 3.157667 1.022710274 4.867489058 1.341311 0.3646893 2.21126985  
0.786259 1.573962 5.209496 1.639405 1.056591 3.144431 1.624268 0.598267 0.2988017  
4.898447 8.099715 0.03533386 0.4761541 2.945194821 4.83612 3.375659  
0.694230765 0.5991934 1.478705 4.240686 1.543074 1.238018 2.139006771 5.89313  
0.9316419 2.94869 0.04876806 1.493578 0.497217296 0.141326 0.6559927  
0.1653072 3.041816951 0.447983555 2.463697 0.6778359 3.352979 4.086658529  
2.485578 3.293325 1.561861292 3.026827 2.649608 0.2556999 6.105331 0.4000897  
2.707068 5.473809637 1.555886 0.4105157 0.6174557 10.8442 5.552365  
0.6668875 2.58156 0.8036213 1.169116 2.316399802 3.202715 6.24368  
0.135798378 3.92315 0.195927 1.55833 1.359801 0.7194331 1.266181 0.8828482  
6.728118 4.796896157 0.7037496 1.498120705 2.966196 2.569768 1.573224  
3.050856783 3.135993425 4.090111 2.631632 3.426653 0 1.081858 0.343582662  
0.9207341 4.678929 0.3197542 1.416394822 0.6574762 0.3168664  
0.756844353 0.1466594 0.495048877 0.1856147 4.885365 3.097515504  
3.523686 2.249767 7.79882549 5.746982678 0.4107357 1.027096 5.009969  
3.472018 2.040862 2.808903 2.188257 1.549995 1.452497 3.00629759 0.1233179  
0.315551281 3.924945 0.446935883 5.348839 0.4971148 1.409733694 2.609675  
0.2279163 0.1863819 0.913874195 0.625133 0.2243577 0.302175828  
2.5184677 1.312796 0.9334416 0.6125671 1.670850279 3.502515449  
4.01420396 0.8276132 0.9290516 0.1160216 0.4571132 0.4999143  
0.8568214 0.4573201 0.4295282 4.285399 0.3517801 0.4475027  
0.87357033 1.244885 0.8393153 2.239431 1.484396 7.934056 1.748021 0.5663204  
0.5403386 2.63269 0.9340566 5.325906092 9.405331 0.7174743 4.517992  
0.3851151 4.803995216 0.1645818 6.552344 2.93084 0.2705587 6.991253  
0.4426979 1.041807 2.105146795 0.4246152 0.5641864 0.879945927 1.11774  
5.104791 4.976922 0.8776275 2.376683 0.676169126 1.507039035 2.141587  
5.679859 4.574921 0.198509088 2.918721701 3.404158332 0.6573574 1.157841  
2.639643 1.414288 4.315574 0.8367775 0.4649503 5.418930238 2.995161809  
0.1976844 3.557065437 6.372747 0.584757053 1.566377 2.35444 1.467444 6.80679  
2.296245 1.509686 2.835158 0.6106174 1.941145 3.310778962 8.923799 0.4264685  
0.5983924 1.334175 4.854171455 1.333368 0.5400834 3.109978 1.934250331

1.433712 0.4522332 0.4166958 0.8952352 4.705254 0.2919018 1.942286  
2.841605455 6.501239858 5.598106582 0.2481514 1.124558208 0.460729531  
7.736183 0.2619135 1.67620744 1.686365 0.7853025 0.5200072 2.578438204  
0.3770859 0.7986521 0.7060102 0.280802392 0.7952134 0.5136456  
0.2884911 1.701266 0.3109521 2.203659 0.8709461 0.5329074 6.572252  
3.181364 4.047458 0.60710325 1.84355 6.08219 2.612125 1.818166 0.4534213  
0.4976026 0.2415143 0.082866669 0.545759659 0.710913273 0.4348403  
3.316506 0.788804 1.67638 3.409905 3.890179456 1.219133 6.667915 0.308366  
0.8914858 1.12648 0.373208797 2.019082 5.253082 1.277805 1.948907 4.568988  
3.152781 6.253809 2.866881211 0.3434218 2.653272 1.487270596 0.3534224  
1.833055 2.690622 1.737804 0.6960852 4.535019027 3.549380105 1.258962154  
0.07757104 3.681732 0.9277026 0.4794151 1.853099 0.6545418 2.187133618  
1.274298 0.152738619 0.2543843 2.653978 2.901696 2.250208 0.5168923  
5.305117701 0.7328747 0.3499738 3.134507 2.015284 0.4629997 4.879533  
5.234878 3.239054317 4.361766 1.354192802 0.1678865 0.1516463 2.201505218  
10.35815 1.869062 0.4805579 1.497912914 0.5815269 5.547137 4.577364  
1.236343844 0.3638648 0.6755035 0.1829465 0.2867213 1.061721  
3.016661 1.061758  
TNRC6C-AS1 0.06823295 1.985914652 0.4526507 2.018591478 1.149576789  
0.639043944 1.230769 1.969782313 0.4786921 0.6569168 0.965127673  
1.614677 0.8369942 1.25432 0.604338 2.521478 0.508562 0.799650816 0.5114384  
0.75653 1.021351562 1.241873 2.632441568 1.073063 0.969856 1.997816906  
0.7668882 0.2830827 0.17355 0.771736 0.3132086 1.353321282 1.264071  
1.830455041 0.7243925 1.704857116 1.875456077 2.641964216 1.166666  
2.044245 1.317390682 1.829508 0.387283115 0.07279793 0.898521773 1.116102  
2.232582 0.7902838 0.478501672 0.4322602 1.433458 0.764408 1.520041475  
0.9119366 0.906418704 2.037209 0.4255982 1.468606 0.5228012 0.8721848  
0.2906794 1.624356 0.844442543 0.7087447 0.3999744 0.8616498  
0.4554173 1.521499 1.478496 0.3422594 0.831904 3.708455256 0.5759619  
0.1869406 1.16175605 1.104034 0.784904095 0.6312531 1.080208 0.3161995  
0.630895 1.170906 1.752225 0.4881997 1.335248351 0.1487107 1.25075  
1.066203 2.098280699 0.6134412 0.5662481 0.8139405 1.453776823  
0.7772787 0.9245742 0.55164499 0.9259269 2.101171893 0.888894271  
0.6242913 1.161600681 0.4675945 0.642063 0.366479874 1.625649 0.3554232  
1.536159203 0.7917387 2.212676442 1.756396767 0.6149371 3.060404905  
0.6933824 0.9872697 0.9096671 0.624291 1.606168 2.212974932 1.58759  
1.625627 0.6893722 0.6546282 1.019703 1.360665 1.641411 0.1972814  
0.4940964 1.358827 2.637194 2.209592542 2.160013745 0.9358488 2.858959227  
1.039333527 0.7675669 2.423919553 1.199118 0.4883152 0.397837713  
2.450647351 1.681695344 2.105734789 0.4165089 0.7088778 0.8334332  
1.332683 2.209273 1.238768 2.433247436 0.7885545 2.243882 1.491676373  
2.192654 1.069524 0.664741341 1.65075 0.8863073 1.621892415 1.140884  
0.5690654 0.788103249 0.8712356 0.729798 0.4475057 1.526522943  
0.8848354 1.932097 0.712273553 0.4842345 1.673672101 1.334451 1.098392

0.560187364 0.9531952 1.745722783 2.792163 3.990472 0.5396835 0.6570755  
0.3195596 0.867075268 0.5819237 0.5114012 3.406177 1.826417 0.3182334  
0.4930525 2.920171 1.619452 2.156387735 0.471925739 6.026418 1.416669  
1.742525 0.370014 1.558241457 1.080378 1.832623332 1.623943 0.6022827  
0.665999503 2.248820117 0.3780187 0.1679478 1.847353289 1.245238  
0.7213098 0.5800564 1.086111 1.467249 1.359176 1.423048 0.3848667  
0.2855839 1.437777 2.092498 0.500068 1.107096 1.263625595 0.7759085  
0.8986165 1.877317007 0.7571589 0.3562677 2.470508 1.124046 0.6226297  
1.235617594 1.264425 1.189808 1.113158 0.05422982 0.5068831 0.533570653  
0.8762515 0.5028855 1.119635 1.799043142 0.781198038 1.266705 0.7039151  
2.075617 1.70566212 1.432228 1.322777 1.822902625 1.261147 1.058439 0.708996  
1.025436 0.7280142 0.7077378 2.300117697 1.230757 0.89223284 0.480145  
2.631932 0.9133733 0.4344582 1.323495 0.5742715 0.8225774 1.100258549  
1.659802 1.711458 0.360357746 0.5276702 0.6309735 2.16213 0.8179039  
1.955094 0.6826602 0.6077329 1.435113 1.88372853 0.6068023 1.951966045  
0.8113696 1.532367 1.011318 1.692506928 1.405292611 0.413471 1.415674  
2.074518 0.4016417 0.8572841 0.40687127 1.053965 2.472068 1.102611  
2.896721211 1.774603 0.5405427 0.94259961 0.5745019 0.955853687  
0.6254623 1.218197 0.991575556 0.7124218 1.315011 1.20885929 1.472105861  
0.429055 0.6619137 0.7894815 1.745322 1.542424 4.436768 1.426435 3.647201  
0.6678556 1.803712921 0.5028057 0.453677645 0.3277701 0.463104565  
1.582967 0.5953111 1.246138868 0.5540075 0.7219249 0.4663252  
1.64443378 1.167 0.9563572 0.702582825 2.533805937 0.3945466  
0.6240068 0.8577712 1.627274232 1.240760695 4.020660664 0.4422228  
0.5366755 0.05864334 0.7470578 0.7917391 0.7152841 1.042292  
0.9335554 1.117563 0.5245335 0.9338463 0.694702075 1.166377 0.4721905  
1.056463 0.9881879 2.174251 0.717877 0.5702056 0.7988622 0.4594079  
0.8210797 1.111909014 1.030464 0.8982533 1.091607 0.7421307 4.579479844  
0.7209647 4.864616 1.401404 0.7282174 2.163297 0.4736307 0.7714449  
0.5320254 0.6238365 0.8435004 0.73310446 0.8945265 1.068305  
1.329073 0.4367741 0.9899866 0.800313952 1.077059268 1.19989 1.158009  
0.8278404 0.371246266 1.470934877 0.771680461 1.469339 0.6400989  
1.044498 0.5351198 1.524575 0.457556 1.006626 3.525702443 2.660617577  
0.419664 2.092132164 2.303588 0.577997026 1.185563 2.300776 0.7223732  
1.222659 1.01208 0.4858237 2.300501 0.7355868 0.7035604 2.35552577  
1.628991 0.2586713 0.7828342 0.5952982 1.487791562 0.5320686  
0.4218879 3.318832 1.320656988 0.9404644 0.4343062 0.5634078  
1.209405 1.574355 0.7795155 1.291753 1.768438652 1.339984335 3.80944573  
0.3046124 1.510347291 0.403652936 1.018601 0.3600864 2.393460106  
1.000122 1.172478 0.6012435 3.927502312 0.3777323 0.2977143 0.6310687  
0.686005388 0.6431076 0.5007019 1.283202 2.566827 0.5433639 1.280921  
1.138287 0.3352025 3.711841 0.6610778 1.554805 0.525500478 0.05711194  
0.2996753 1.128589 1.343776 0.4980905 1.059504 0.6439399 0.318326982  
0.679293794 0.666761572 0.7949105 1.691574 0.4529261 1.916269 2.016682



2.067928198 1.059887 1.462511 0.6312501 0.4570405 0.5521276 0.751861786  
0.7999789 2.190524 0.4562309 1.241571 0.3576972 2.899999 1.420019  
1.533210643 0.4304865 2.053105 0.975339648 0.4210755 1.577734 1.437285  
0.895656 0.5242381 1.738111909 2.580002555 0.298805489 0.06665435  
1.995499 0.5245922 1.151027 2.115983 0.8916912 1.121868856 1.453243  
0.885250181 0.4886004 0.6597338 0.2412906 0.4779844 0.2990025  
0.869170257 1.528878 0.9670259 1.028845 2.139122 0.5499568 1.464079  
1.243141 2.432391669 2.842761 0.481987684 0.2749418 0.3525897 1.020555633  
1.336555 0.9195289 0.6045486 0.87885671 0.7142595 1.190015 1.284069  
0.660063883 0.8159193 0.3883819 0.1417884 0.673896 1.124816 1.099896  
0.8914646  
THUMPD3-AS1 2.519282 2.523727168 0.7027542 1.296120605 1.100348237  
0.703849891 0.9456305 1.18516485 0.554594 0.3855362 0.558314048  
2.034317 1.452099 1.956884 1.296941 1.543139 0.8118472 0.725213058 0.4716843  
1.201834 0.554618162 1.104184 1.836231609 1.953996 1.166344 1.121197134  
0.9855845 0.3080116 1.463678 1.135442 1.022648 0.657066569 1.156557  
1.799029274 0.7686413 1.865184133 1.717461214 1.657935932 1.751549  
1.481257 1.293835107 1.603689 0.352667387 3.313086 0.940363731 2.102629  
1.909515 1.584786 0.47417112 0.4312698 1.518245 4.623283 1.566360878  
0.8709662 0.594071393 1.489801 1.140664 1.372805 0.4098997 1.409915  
0.5529252 2.072935 1.825522878 0.7392494 0.4247428 1.041189 0.3788724  
1.613685 2.134789 0.2868724 0.9078102 3.130357668 0.383716 0.3598765  
0.814988069 0.713911 0.303240643 1.160272 0.9970802 3.246227 0.625873  
0.4567825 1.19965 0.676536182 1.952707618 0.5802947 0.725303 3.003698  
1.220288638 0.7857286 0.7486276 0.3232022 1.563581549 1.314628  
1.320962 0.847806286 1.784624 2.16984975 0.487899217 0.3574437 0.291028241  
0.3441037 0.935239 0.545661983 1.93107 0.7480029 0.477851314 0.8651271  
2.361082395 0.831293791 0.3139538 2.218737108 0.6523054 2.462226  
2.494564 0.6297513 0.8192247 1.68681192 1.658974 2.205387 0.666888  
0.7906345 0.5020681 0.8421036 1.39464 3.705929 1.08721 1.559841  
2.397947 2.993951467 1.765927542 0.5679926 2.163464504 1.545706759  
0.6466109 1.35339023 1.064733 0.6709644 0.635861891 1.769833365  
0.651905734 1.292552028 1.588589 0.8495331 1.180749 1.000374 2.436243  
1.494482 1.30944647 1.065654 1.265365 1.577069166 2.121748 1.027314 0.620189004  
1.39008 0.629218 0.934920119 1.217192 1.625344 0.449062116 1.332823 1.642272  
0.4974266 1.250622464 1.044185 1.136056 0.470277487 0.4603548 0.909608289  
1.278906 0.4787169 0.648415757 0.8028866 2.271167005 1.308378 3.703584  
0.405638 0.8084313 0.7549818 1.551355769 0.5940235 0.613145 2.470812  
1.885624 1.010279 0.3524506 1.837662 1.49227 1.664009671 0.781938064  
2.404289 0.8126049 2.744769 0.7688528 1.448296089 1.326325 1.654841311  
1.053971 1.204153 0.502628035 1.386443461 0.6139619 0.4224196 1.003025222  
1.090391 1.205492 4.601917 1.405507 1.084507 1.735233 1.117992 0.5746916  
0.3236279 1.627201 3.480003 0.4435174 0.8701522 1.447465154 1.101897  
1.324621 0.612326747 0.5072554 1.751235 1.494369 1.490168 0.6562726

1.305621976 1.478353 0.6100337 0.9017881 0.4980171 1.569872 0.515350566  
0.698222 1.02733 0.5673924 1.507522085 0.436828586 1.529238 0.7494493  
1.063335 1.655652049 1.072298 1.787079 1.470106891 1.070357 1.212261 0.4792373  
1.531172 0.502974 0.6421244 1.610667753 0.8937359 0.545855039 0.9296465  
2.681664 1.567854 0.6148118 1.425368 0.9138032 0.8655743 3.166146727  
2.334498 2.473601 0.416511478 0.9996894 0.4128629 1.406253 0.8100296  
1.008387 2.161682 0.7960206 2.144715 1.691078631 0.513752 0.687026616  
1.422968 1.104965 1.135698 1.65696713 1.072134186 8.403328 1.096426 1.862133  
1.401372 0.8587847 0.536043706 0.5607696 8.132537 0.4056448 1.371467803  
0.6597551 0.339874 0.629043194 0.3510184 0.66352328 0.4585152  
1.449967 0.988490007 1.189938 1.214998 4.05580354 1.523150268 0.4563367  
0.4597893 1.214774 1.406505 1.732171 1.840083 1.382379 2.17969 0.7310086  
1.301323829 0.5130548 0.611658232 1.903017 0.390905674 2.075265 0.5938868  
0.734686378 1.107768 0.4929712 0.7335724 1.033697302 0.4374104  
0.6364249 0.430965065 1.343756129 1.315963 1.14669 0.654833 2.046129974  
1.012648812 2.892535703 0.5449906 0.564728 0.6664538 0.3962053  
0.5613247 0.8212756 0.5631281 0.593981 1.973179 0.5030969 0.6823079  
0.838395493 0.7945441 0.8255327 1.693997 0.6675525 6.128185 1.673504  
0.8417822 0.7663767 1.824778 0.8409583 1.773518426 1.684247 0.3953035  
1.483836 0.6401004 2.094893811 1.034877 3.922524 1.679383 0.3981309  
1.781838 0.4264421 0.6593892 0.741114713 0.3513085 0.4780146  
0.548711989 0.452477 1.194008 1.764725 0.6822256 0.974722 0.745245235  
1.267571608 1.315379 1.526558 5.324005 0.450481181 2.024191984 1.060742805  
0.6889012 0.5696372 0.8610915 1.441398 1.770452 0.5097948 0.4423819  
2.126601002 1.979442191 0.5432384 1.467659886 6.751588 0.46537239  
1.728887 1.34966 0.6515419 2.178191 1.941068 1.390014 1.452986 0.3247706  
0.6748643 1.931802542 1.511539 0.9466242 0.716416 0.8515329 1.783456416  
0.7249413 0.9644822 1.413999 0.66561153 0.5987447 0.4993869  
0.4801963 0.7098979 1.713044 0.6624193 1.036673 2.764550965 2.161784565  
2.069531699 0.4877156 0.806040056 0.370296829 0.9651679 1.448768  
1.519844093 1.718919 0.6511537 0.6338235 2.014486462 0.3208986  
0.7150482 0.6377038 0.3650804 0.9288361 0.715508 0.4705508  
1.173298 0.6583972 3.379456 0.5382318 0.5983708 2.48669 2.133274  
1.318363 0.481661448 2.039089 3.294755 1.32461 1.644672 0.3065441 0.5646104  
0.4795647 0.374143561 0.563616436 0.646997166 0.4445708 1.799594  
0.4452751 1.243696 1.391882 2.014833981 0.9308478 1.338349 0.4628766  
0.7405878 0.9053727 0.364860985 2.43416 1.512031 0.5938321 0.9335649  
3.276702 2.302247 2.077614 0.937843392 0.9303311 1.577126 0.822138998  
0.7214685 1.140229 1.3678 1.446539 1.280991 1.406680733 2.1035683  
0.566740143 1.248739 1.319534 0.6763959 0.6204701 1.326096 0.8023631  
1.042640192 0.7257723 0.480203727 0.5742733 1.425462 2.539031 1.222073  
1.535484 1.187037395 1.133952 0.6866551 0.8891511 0.6505169 0.746979  
1.859037 0.9291943 1.240390043 1.649709 0.470168368 0.3547957 0.806565  
1.311430519 2.806863 1.820313 0.5414839 1.220563239 0.3690958 1.60356

2.545482 0.811012008 0.6568281 0.6586832 0.5730137 0.2821235  
0.9517078 1.622507 0.8324388  
TTC28-AS1 1.177819 1.90825631 0.7035458 1.4321245 1.488577847 1.100442983  
1.378441 0.80903778 1.218893 1.095442 0.580294188 1.201247 1.423907 1.327669  
0.8003114 1.549727 1.117808 0.621464504 1.127878 1.076636 1.054399341 1.13113  
2.500427735 4.501823 1.276567 1.345868114 1.417991 0.3737812 0.7407253  
1.590522 1.126587 1.046303248 1.403596 1.765683188 0.9435467 1.745078416  
2.231183684 1.683910483 1.324415 1.926749 1.156272369 2.361334 0.721282237  
1.419413 1.02849611 2.702972 2.177195 1.348028 1.098813579 0.689891 1.964649  
2.520615 2.238228218 1.32337 1.059750764 2.396974 1.243358 3.570642 0.7371792  
1.201385 1.057711 2.005422 2.77697693 1.161183 0.4091282 1.187695 1.215244  
1.170944 2.748182 0.8880741 1.33995 2.088546655 0.7473218 0.6315481  
1.252951642 0.9716279 0.418908473 2.644715 1.094118 2.14526 0.8842587  
0.8785432 1.7175 1.042127154 2.629024761 0.4916644 0.7173865  
1.323597 0.862668518 1.249493 0.7849286 0.8861272 3.489749345 1.167658  
1.289906 0.572995059 1.295871 1.818496379 0.647737493 1.010529 0.766886279  
0.6472943 0.8345955 0.754759854 2.041649 1.767107 0.605969545 1.681511  
3.289959253 0.723950685 0.7812635 1.824092941 1.11228 3.299414 2.70647  
1.112553 1.153622 0.978438232 4.304512 1.353923 1.636981 1.049034 0.9986715  
1.026143 1.244559 1.848593 0.9540744 2.11504 1.536757 2.438695555 1.749069967  
1.116758 2.064480985 2.196107078 0.9089721 2.047133362 1.069711 0.5156411  
0.337123204 2.359698864 0.546073947 1.039224725 1.791918 1.398695 2.087806  
1.23861 3.413907 2.411201 1.548686204 0.8639989 1.268313 0.622051593  
1.454302 1.46742 0.854043336 1.56167 1.371917 0.753765764 2.156791 1.682952  
1.434599413 1.781134 2.971582 1.090014 1.342184519 1.638543 1.084692 0.69332927  
1.688316 0.883108476 1.445235 0.7113187 1.017626366 1.195018 2.575745975  
2.128102 2.546983 0.8627339 1.556251 0.4573588 1.521357291 0.8985996  
0.5133047 3.025823 1.959151 1.426626 0.4787188 2.058485 1.781277 1.864985411  
0.471853448 2.763302 0.9886915 2.864298 1.002489 1.736255489 1.036558  
1.493661062 1.58983 0.9018852 0.7513779 2.113117004 0.56011 1.185122  
1.24084406 0.8121656 1.05031 0.956556 1.12596 0.9573302 1.83018  
0.6720751 1.09178 0.3810288 1.900094 1.786718 0.8706246 1.032067  
2.628695309 1.780143 1.622327 0.678235477 1.321744 1.437539 1.755203 1.191082  
1.201854 1.280544794 1.945914 0.7268638 2.240163 0.6499703 2.534341  
0.596286695 0.7034296 1.371705 1.259348 1.909962903 0.764756545 2.714508  
0.8719736 0.8833417 1.770930993 1.223527 1.231338 0.865879609 2.416147  
3.127368 0.9616689 0.9077798 1.249293 0.8946849 2.073543187 0.9696244  
0.797892932 1.807246 2.912964 1.989133 0.7244216 1.800221 0.9632149  
1.485073 1.364017629 2.40308 3.358607 0.628434672 1.420959 0.6171264  
1.112172 1.236177 0.9957506 1.738081 1.635953 2.579423 2.085151928 0.9365802  
0.917533921 2.083823 1.874641 1.251153 1.472299195 1.19372713 2.865011  
2.056799 2.109587 1.74186 0.9230655 0.553218629 1.020384 4.829868 0.6021214  
1.109249433 0.8559863 0.8179052 1.201730029 0.8008614 1.260525868  
0.4275762 2.661606 1.546697768 1.326613 1.17579 1.56125498 1.542629527

0.7574894 0.9691039 2.141171 1.348004 1.193972 1.66962 1.578871 1.539719  
1.067767 1.644577083 0.6611418 0.927366587 1.240732 0.900853848 1.964284  
0.917054 0.969640058 1.943023 0.5922109 0.810769 0.661625318 0.4680118  
0.7936927 0.52344307 1.975752976 1.425946 1.011954 1.307498 1.740059369  
1.934565403 1.823965435 0.586043 0.9517771 0.405668 0.6518518 0.9990699  
1.406408 1.470751 0.5492022 1.931421 0.5715857 1.032168 0.936691129  
1.204025 1.259425 1.862504 1.087181 5.182575 1.240363 1.211375 1.083562 1.636045  
1.084184 1.733604759 2.085746 0.701511 2.690186 1.108924 1.974396956 1.238928  
1.758956 1.633595 1.101818 2.258355 1.110837 0.8399557 1.170585854 0.5170116  
1.071227 0.688985527 0.8946632 2.287746 1.4092 1.442665 1.680855 1.100983308  
0.765532443 0.7734396 2.603437 1.466 0.583847559 1.938648835 1.516997593  
0.8818205 1.238327 1.546519 1.562466 1.735132 0.7181465 0.8670361  
1.800027891 1.591197751 1.061197 2.19290578 5.524881 1.007598108 2.418721  
1.216681 1.032741 2.876346 2.302846 1.262723 1.48813 0.9398257 0.4284595  
1.386028557 3.108311 0.8192508 0.4705801 1.269843 1.839577904 1.656995  
0.2948724 1.481505 0.987396897 1.073363 0.9779693 0.743484 1.034465  
1.652001 1.055653 1.551668 2.485735776 3.448354122 1.846495838 0.7626642  
0.93839412 0.650691381 2.164743 0.7778719 1.388870874 0.8176279  
0.672162 0.8957301 1.075025915 0.9208181 0.3921788 0.6022359  
0.872088958 0.4906683 0.9855116 0.6803817 0.6578292 0.9885662  
0.960867 0.7728287 0.4152854 2.104525 0.8709851 2.041546 0.764806709  
0.905124 0.9503082 1.577898 1.489163 0.6602649 1.393168 0.608502 0.703335131  
0.830646402 0.942291221 0.99125 1.47587 1.038322 3.203901 1.615831 0.92238032  
1.109969 2.495168 0.971435 0.7124729 0.4324872 0.918926738 0.8707404  
3.045863 1.243611 2.361191 1.387691 2.485941 3.714314 1.453196694 0.823587  
1.281931 1.058868897 0.6469446 1.48867 1.529702 1.681651 1.574846 1.878463957  
2.210921738 0.90290539 0.8982372 1.798743 1.042277 0.6433915 1.068917  
0.6025998 1.619425058 0.819038 0.636669759 0.5266948 1.651894 1.195542  
1.400157 0.2220744 1.375205008 1.52927 1.303658 1.351466 1.848076 1.515709  
1.793671 1.572346 1.614094944 1.54332 1.025898896 1.175407 0.6903379  
1.249717466 3.61825 1.35487 1.104801 1.824342477 0.6052062 2.976821  
2.672156 0.624589784 1.069505 0.9951195 0.6823148 0.5189502 1.670095  
1.660586 0.5981125  
AC015813.1 0.3916765 1.52747443 0.626661 1.097194893 1.884555197 1.982808003  
0.7990138 1.31869211 0.2307204 0.2178804 0.64643186 3.844276  
0.8582547 3.759282 3.074068 3.633027 1.840998 0.862102542 0.9480904  
2.892259 0.681887741 2.392495 3.789928244 5.242028 2.080025 2.025931019  
0.9061104 0.3369243 0.4586023 0.8119973 2.070582 0.828094925  
1.971262 3.216129095 1.312358 4.413020775 3.531330051 2.010503203 2.842252  
3.300415 1.098831703 3.708771 0.487939255 1.307207 1.416406437 3.047292  
3.744257 6.324177 0.575304421 0.9021502 1.904113 7.24745 2.224501537  
2.184441 0.628504366 3.88656 0.3498985 4.774634 0.1312838 1.349904  
0.3556433 5.387076 2.240703702 1.183084 0.3474083 1.862166 0.3692546  
1.901656 1.609048 0.7002489 0.9451243 5.433625873 0.1810777 0.4774497

1.074047646 0.9652467 1.583139863 2.313092 0.7573567 1.381668 0.9025846  
0.4585625 0.9414929 1.485108521 4.897537943 0.2604645 0.2570606  
3.771087 2.157406589 1.192871 0.1767344 0.2326329 3.919524098 1.997984  
1.346675 1.217711057 0.9279771 3.85334743 0.687331844 0.2990001  
0.30523486 0.2916574 0.9253161 0.549477884 3.055555 0.4424732  
0.868165919 4.121838 3.655817788 1.827000265 0.3337892 1.935775726  
0.6192718 6.78383 11.31897 0.5832807 2.114603 2.588606877 1.553149  
6.289291 0.3647754 0.7973923 0.5660494 4.937555 1.644733 0.7844585  
1.606158 2.888404 4.099208 4.186147638 3.003417318 2.190145 4.319121824  
2.627782142 0.521728 3.031063789 1.33056 0.2384152 0.279576818 3.985766158  
0.614529555 1.554469522 1.295543 0.7969654 2.754282 1.500311 2.663014  
2.874485 1.393105006 1.471148 3.535642 2.652210101 1.971854 1.732273 0.368021666  
4.901373 0.6981393 1.364909844 2.893847 1.254545 0.662689928 1.388647  
1.288549 0.3461008 1.544314855 1.79754 2.650456 0.253870546 0.2745678  
3.705399629 1.492743 0.9062624 0.584907263 0.8465101 9.100910783  
1.895867 6.157128 1.661564 1.268415 0.6398598 1.009182114 0.6272185  
0.8756107 4.850813 2.438531 0.6005311 0.1394481 2.527231 4.661551  
2.137059304 0.098720375 5.297792 0.935421 4.972703 0.4505253 2.307160879  
2.7677 3.230465593 1.949548 8.680877 0.617331257 3.582067238 0.4885956  
0.3971228 1.485433566 2.354508 0.4981143 2.641784 2.279573 2.650495  
5.822413 1.806924 0.4497389 0.7133766 5.267194 7.347633 0.1163306  
1.074082 1.39495955 3.076916 1.817834 1.279024924 0.6508896 1.451079  
1.904632 0.7888024 0.7014439 1.731331555 3.80307 0.6705193 1.883757  
0.05227547 1.523398 0.471479872 0.2452699 3.038707 0.3366727 2.09876731  
0.300126629 2.139889 0.9341819 3.276827 1.604763885 1.953851 3.46264  
0.902323513 1.606599 1.992699 0.4195254 2.575894 0.465067 1.293642 2.986913656  
1.870303 0.231806816 1.971043 4.05842 2.291788 0.7621286 2.466031 0.6131768  
1.63632 4.822648122 1.998994 2.247763 0.163760647 2.392848 0.2893107  
1.124541 2.448418 1.879334 0.5673141 0.6727403 4.669773 1.896424986  
0.3011114 0.999205382 2.026168 3.217835 2.443076 2.985407755 2.376010057  
6.290089 1.996938 2.228621 0.1521014 1.790267 0.526133119 0.7153339  
10.25394 0.5794124 1.668419969 0.7928573 0.5307117 0.567893707  
0.2891488 0.519281741 0.5116222 2.274788 1.656850727 6.642061 1.793219  
8.79760831 2.453681451 0.3197242 0.7937764 3.30566 2.654734 2.291814  
1.87376 4.132789 1.042838 0.9291539 1.428905624 0.1856912 0.295293936  
1.437252 0.456266272 2.979535 0.4508877 1.425776215 1.244541 0.3024767  
0.5815214 0.486301517 0.3318554 0.6899873 0.323908363 1.946647681  
0.4618266 1.00288 0.6114584 2.686527161 3.715451684 3.472706705  
0.9278711 0.436963 0.675129 0.4374901 0.6666455 1.032721 0.4074478  
0.3617585 3.775697 1.093084 0.7635836 0.677773539 2.317794 1.450104  
3.787967 0.313241 12.72042 1.539143 0.735398 1.075657 1.792568 1.361927 3.288849406  
2.538545 0.6127247 2.593198 0.6781922 3.090990208 1.654974 4.173107  
1.151182 0.6344129 3.888327 0.4321674 0.4028219 1.75285526 1.892139  
0.3774084 0.336868494 0.4350347 1.179413 2.794452 1.258636 2.780013

1.41508439 2.216514101 1.156142 2.707966 3.431014 0.319178841 1.866665563  
1.097855084 0.6067687 1.382401 2.838148 1.314901 3.549404 0.9755882  
0.8692151 3.132059741 2.986126894 0.1816302 2.306126523 8.243128  
0.422849956 1.657505 2.463682 0.9696802 3.87214 3.744831 1.342773 2.023147  
0.2337618 0.909876 2.137035468 4.654996 1.599991 0.7411468 1.525236  
2.28533306 1.79464 1.811964 2.306286 1.388715487 1.60025 0.4624986  
0.9212458 1.364655 2.40005 0.4823804 1.60453 1.577379491 5.113226143  
3.091642511 0.2578557 1.060907229 0.390976676 1.418658 0.9786155  
2.454503259 1.998743 1.443054 0.8634819 2.884339562 0.2099772 0.3477871  
0.3840834 0.404913634 0.6912363 0.8736356 0.2773338 2.640995  
0.5135785 3.986122 0.7668731 1.575428 3.83584 5.228925 2.023945 0.639145391  
1.229395 0.9392013 1.728761 2.15929 0.5114902 0.5071969 0.3420968  
0.162848498 0.316010289 0.483836364 0.4688886 3.543487 0.3478772  
2.586811 3.270719 1.800513203 0.9303266 5.427128 0.2341351 0.8483402  
0.8285204 0.251051808 1.216792 3.504516 2.385534 1.334529 2.522443 3.977041  
2.213656 1.48342788 0.7309827 1.953931 0.913911469 0.6571724 1.70023  
3.044602 3.372211 1.343066 2.276601535 4.872284078 1.144147172 0.356357  
3.009766 1.047696 0.238594 1.567172 0.5655888 2.099445622 0.5122296  
0.206603597 0.3798038 1.925439 0.5375093 2.505821 0.5144911 4.905797021  
0.9590236 0.544852 2.539215 0.6544521 1.208251 2.635107 2.25783 0.923506794  
4.143298 1.155653 1.066911 0.1238497 1.844526309 7.611627 1.351558 0.7072675  
1.097414303 0.7368892 3.430186 2.841721 1.363718158 0.8003296 1.26715  
0.1330706 0.1262299 0.7511327 1.474074 2.066229  
AC011472.1 1.027969 4.190124445 0.7750057 2.902848487 1.581077766 1.767379731  
1.057966 0.856122681 0.7294466 0.3986006 0.557208511 2.145049 1.892781  
3.065955 1.078936 6.248372 2.354461 0.529466861 0.9407495 1.517393 0.936481589  
3.072197 2.134634531 7.46894 1.875794 1.931983748 2.017199 0.4469459  
0.4773862 2.291359 1.525656 1.239845587 2.467898 1.761151417 1.464408  
5.163884568 3.539498066 3.5841318 2.328303 4.481414 1.780345758 3.715037  
0.518567745 1.290649 2.712704594 3.79504 2.254733 1.60568 1.268473135  
0.7802968 5.726095 5.114595 3.122610396 1.657521 0.987661857 5.278321  
0.7598282 5.538826 0.6056069 1.131577 0.778433 6.497216 1.910992565  
0.9379018 0.8516571 2.19875 0.5194581 1.512071 4.247682 0.6877529  
1.25143 15.440944008 0.504437 0.1345343 1.339154334 1.155684 0.308016031  
4.556221 0.5692006 2.634412 1.084632 0.7070108 2.010291 1.23832728  
3.373907409 0.5392887 0.3403714 1.021249 1.401821764 1.653036 0.09627935  
0.4514796 4.266091831 2.450635 1.414851 0.954624947 0.4703191 5.693537941  
0.604239723 0.6037193 0.519632398 0.5319836 0.8968633 1.562268175  
3.422583 0.3476618 0.726869158 3.415534 4.333697447 1.582354131 0.3964489  
1.753811416 1.085257 5.31458 2.787593 0.9165953 1.806902 1.403951957  
1.919094 4.03664 1.461163 0.2610543 1.788457 1.754437 5.968067 0.8055177  
3.03902 3.308099 1.990472 4.542854602 4.313786188 0.7863759 7.20120731  
3.303987979 0.7866831 3.67393211 1.524515 0.1873285 0.761523358  
2.434752486 0.17375938 1.926272734 1.689346 1.228221 2.468282 1.123284

9.987911 3.113138 2.320831955 1.9807 3.293286 1.104910342 0.3575383  
2.906592 0.417680516 3.925664 1.398789 1.783247152 2.57434 1.493707 0.37328975  
3.518985 4.656112 0.9508512 2.903581894 3.422711 2.635959 0.513225261  
0.777904 1.13830002 0.8576714 0.2892793 1.950219944 0.9347679  
5.191753181 2.489205 11.43046 0.65068 2.241903 0.7388286 1.384683735  
1.212072 0.3596722 14.07268 4.189445 0.7093824 0.5311247 3.887076  
5.505485 4.693758071 0.347713969 6.012647 0.8118436 4.766312 0.9421111  
4.700201891 3.195788 5.337799191 2.108151 1.211467 0.446419493 3.680893227  
0.6993361 0.6654992 2.186192612 0.4782653 1.285663 0.9447445  
3.640349 1.391717 2.572243 1.768453 0.7656364 0.4248818 3.998971 7.001372  
0.3868716 0.6301944 2.43727601 4.09942 2.156012 0.203602388 0.7907853  
1.464845 6.872397 0.8873515 0.6293437 2.867762028 5.486741 1.117206  
2.378159 0.343262 1.168089 0.448685339 0.4052671 0.8978107 0.4912733  
3.992219608 0.613123363 5.075961 0.6987915 2.622277 2.942914671 2.235492  
2.897576 1.443580056 1.855375 3.375663 0.6570647 2.412279 0.9102536  
2.117127 2.396039092 1.36892 0.280921882 1.188667 6.287611 4.184455 0.7147239  
3.653375 0.801868 2.084684 0.943022381 5.199754 6.573294 0.265510888 3.328209  
0.3940184 0.8531105 1.524299 0.9598144 1.026923 1.742571 8.20854  
4.148322983 1.003642 1.275786837 2.228812 4.095817 2.460755 2.473287707  
2.965057394 4.661063 5.917125 2.499228 2.044245 2.265345 0.767734293 0.720082  
2.692669 0.3056428 3.365780721 0.6684534 0.4956259 0.615584476  
0.4014446 0.851762479 0.3871051 6.764083 3.499146102 2.152135 2.639226  
11.79189724 3.580415916 0.2141504 0.5773469 3.543635 2.715374 1.874789  
2.993098 2.458877 3.378715 1.319179 4.458018269 0.6429579 0.877455621  
1.167781 0.495177205 3.728493 0.5981237 1.640953759 1.341201 0.4753264  
0.2186466 1.000603908 0.5866801 0.5848808 0.551422205 3.704775796  
1.304191 0.2590394 0.7274807 2.709070763 4.378078547 4.40238234  
0.8321845 0.6573882 0.1814749 0.5759662 0.7819397 0.9294902  
0.5202299 0.4199034 3.060064 0.5273095 0.5499688 1.047567935  
2.065914 1.027419 4.932105 1.500685 5.831221 0.9398685 0.9035248 0.9772271  
1.152036 1.492763 2.897566392 6.163964 0.3021404 4.084714 1.072984 2.570632904  
0.4290505 5.02459 2.039999 0.3173953 6.96643 0.7790004 1.140678  
2.322572043 0.4870513 0.9521396 0.569530483 0.8013091 3.291916  
5.708736 0.4223812 3.224805 1.057628335 2.137954179 1.987144 3.620846  
2.325652 0.349309708 3.793236864 2.74297894 0.257051 0.4810561 1.975922  
2.212155 4.282381 0.6544218 0.3030212 2.549175 1.196138358 0.4638114  
3.359942326 5.134988 0.558950551 2.104525 3.299078 0.723518 5.103437 2.963124  
1.318432 1.53733 0.5571392 0.5924365 1.606005101 7.330533 0.2668239  
0.935974 1.906945 2.665501545 1.317211 0.8831689 5.727515 1.512726533  
1.220937 0.4547311 0.2444152 0.7319646 3.368882 0.5136497 1.439063  
2.604310799 6.468549577 4.3375943 0.4435947 1.664744246 0.450405627  
3.473301 0.3277371 3.487978103 1.072675 0.4724343 0.711697 1.298781389  
0.7238676 0.9369074 0.6102734 0.512419127 0.1463331 0.6886436  
0.2506904 1.097675 0.9380089 2.54205 1.556901 0.9724702 6.37112

2.183965 3.62385 0.504474526 1.534811 0.7594765 1.119383 1.137552 0.8274208  
0.8512917 0.9444101 0.280834025 0.48017738 1.389966637 0.5667954  
2.672351 0.838988 2.975081 4.955624 3.315882313 0.6991982 6.320971 0.5627182  
0.4980055 1.281441 0.604601999 1.83376 7.82389 1.169438 1.121573 1.826943  
3.32016 4.439469 2.495254481 0.3491556 2.980533 0.954383907 0.5528048  
1.515504 4.518632 2.450819 2.667511 2.991580901 5.28738521 0.642131304  
0.4853302 4.695614 1.133644 0.3983716 0.9222563 0.3168905 3.104240613  
1.899759 0.159270499 0.3647367 1.973528 1.390886 3.475106 0.2470404  
4.470898311 2.344754 1.338115 3.147497 1.358708 0.8147249 6.901556 2.810125  
3.691204505 4.714698 1.323848412 0.3413791 0.1976643 2.877764729  
13.73191 1.689127 1.002218 1.584941453 0.6821954 5.133068 3.102525 0.694968104  
0.2069594 1.353752 0.2861553 0.644682 1.195695 2.862912 0.5766479  
ITGB2-AS1 0.03890524 1.216443119 0.6565167 1.492193317 2.361629529  
0.641024392 2.398619 0.752613071 0.3404882 0.1705524 0.611215226  
3.151016 0.1395008 1.653423 1.401101 5.050681 0.3615151 0.721916098  
0.2970513 0.5059164 0.375656164 0.8799717 7.217140521 1.601824  
2.876891 3.036072573 0.2658579 0.2920731 0.3829933 1.860417 0.07679937  
0.578730221 1.275764 1.778341004 0.3483478 5.066814622 2.497147149  
6.82194308 2.18701 2.726109 4.468252776 4.445133 0.766507505 0.08762824  
1.17389658 0.9507237 9.472098 1.008933 0.320213493 0.3208639 0.9867947  
7.709217 6.411712234 1.22997 0.245875678 5.76042 0.09851934 0.9744937  
0.2776349 0.6260067 0.2826086 1.915746 1.203170281 0.1347046  
0.2318943 1.580213 0.1792174 3.55071 1.023755 0.1605133 0.2816377  
3.407330318 0.4512966 0.1569934 1.370379016 0.4467283 0.45186273  
1.916608 0.6702614 0.2525236 0.6098374 0.5156495 2.580478 0.614147856  
2.478944974 0.1258635 1.651188 0.8372716 4.717768473 0.1680092  
1.674048 0.7542269 1.517851279 0.4565978 1.314722 0.989485364 1.806931  
2.503542946 1.557960806 0.3563963 0.720521988 0.3890303 0.7004074  
0.270084949 2.928896 0.2212912 1.221426402 1.392346 4.846450171 1.998923068  
0.3084214 7.539384149 0.5717026 1.294583 0.6612563 0.8227783  
1.310542 4.095819646 0.9754125 1.780055 0.2728144 0.3229128 0.9091412  
1.495911 3.884098 0.27705 6.527509 1.155247 8.328759 5.071701075 1.202278463  
0.4619911 3.065847683 1.644582341 0.2072931 3.179716913 0.9614263  
0.123874 0.49616412 8.206905948 1.353468328 6.672888222 0.2336433  
0.9132865 0.9581528 3.66089 1.679212 0.5841047 3.381236443 0.6040351  
2.94418 3.772584145 7.537879 0.3317546 0.566611974 1.617852 0.3072571  
3.548953078 0.9012302 1.614631 1.846972761 1.358286 1.206472 0.05121168  
2.202399023 1.557022 3.322086 0.951940789 0.07644357 1.386442304 3.766166  
0.8861254 0.498506356 1.460484 1.146196091 4.499905 11.65877 0.4049624  
0.7726819 0.7228953 1.838470254 0.4916779 0.660353 1.645806 1.9022  
0.1266057 0.2253784 1.449964 0.6667663 2.844254464 0.227226372  
12.21544 1.399197 2.258006 0.3213594 1.01063516 3.165118 3.776727403  
2.114344 1.707326 0.477532746 1.373053722 0.4525553 0.3254314 1.865770702  
4.026343 0.9320964 0.9370912 1.790067 1.228188 1.418364 2.26714 0.327599



0.1090785 2.690135 4.677321 1.373716 0.2807888 1.612729732 1.492083 1.18095  
2.724385907 0.9911546 0.1484467 0.8139372 2.228366 0.2429191  
3.444112992 3.131834 0.6348514 1.311898 0.008901471 0.8957445 0.237360311  
3.78338 1.337054 1.363819 2.322958849 0.551940362 2.287135 0.25307 5.590591  
1.610014473 2.873334 1.93217 1.308782455 1.418521 1.778489 0.5333949  
0.3192251 0.2854693 0.7326489 5.308736808 0.5253829 1.236345992  
0.2687512 6.441437 1.216145 0.2073829 3.534026 1.198749 0.4609328  
3.747324041 5.757012 2.235444 0.241671539 0.2609442 0.9247007 2.894145  
0.2937032 2.595417 1.12132 0.3376337 3.064012 1.01868206 0.2342379  
1.045175086 0.700648 1.496214 0.7878366 2.763940486 1.674490631 0.341282  
1.029306 4.441437 3.015287 0.3121267 0.743596953 0.143344 4.495739 1.601759  
8.591144717 0.5580323 0.2891829 1.171463434 0.3413079 0.831308492  
0.5816004 2.391102 1.688285 0.3859 1.979507 1.61329272 0.746729789  
0.6247519 0.7205974 0.9615204 1.970658 2.288286 12.9713 1.59307  
1.342343 0.1368358 2.01675893 0.5777259 0.575965217 0.1323796  
0.265127572 1.061202 0.5374404 4.123007796 0.7825507 0.2634718  
2.279317 1.934954305 1.217103 0.3617361 0.747658631 2.637730658 0.3043826  
0.9728033 0.4969325 4.916787605 1.672021794 9.584043013 2.449354 1.00131  
0.03176555 0.5052474 0.6159219 0.3228754 1.145858 1.372006 0.9182344  
0.7544586 0.4375777 0.74409942 0.676132 0.5461821 0.5027228  
0.5088419 2.111197 1.635185 0.8269485 0.3945048 0.5606256 1.304621  
1.676554536 1.265964 1.752825 1.2633 0.8918523 12.506752797 1.401893  
11.71903 3.252535 0.2407478 2.778897 0.3838198 0.3042521 0.452860669  
0.7182001 0.1788584 0.841836759 0.8075689 3.073175 1.559456 0.8440803  
0.8937492 1.16733703 3.243323844 1.90148 1.028014 1.628338 0.235515806  
1.324026839 17.435447882 3.126282 0.5481551 0.5162199 1.416111 1.084156  
0.1596767 1.011318 9.09525094 4.617843898 0.4780955 2.715084253  
4.229805 0.664121126 1.165615 1.817476 0.8792389 2.700468 0.9723721  
0.2571874 3.104951 0.6780115 0.4148028 5.836519533 3.46859 0.1634679  
1.342795 0.5878127 2.243316368 0.2006778 0.2150828 0.8697923  
0.6771658 0.7559955 0.3655547 0.3707832 0.4382206 1.215674  
0.4617588 3.069388 3.338930118 1.575606975 6.130822221 0.3817658  
0.513154637 0.434493019 0.2527761 0.1147349 4.113969075 0.7346318  
0.452068 0.2076269 8.256032144 0.2627987 0.1184424 0.3594674  
1.272805754 0.4439811 0.3616226 0.6026337 1.273158 0.2027037  
1.518405 0.9197601 0.2972133 5.308459 0.5226154 1.90042 0.685652525  
0.01085475 0.1865818 0.391876 2.013307 0.5076037 0.2327409 0.2644968  
0.91760617 0.772021584 0.187432016 0.5423613 1.311593 0.155496 1.812367  
0.8821398 1.890837841 1.053282 2.950478 0.2439017 0.6392569 0.6666833  
0.165435635 1.176939 2.77778 0.5557903 1.402774 0.4263866 3.03117  
2.590297 1.679567239 0.965328 1.998809 1.350372 0.2119582 1.128017 1.142478  
2.553164 0.9402003 0.856553599 3.331833428 0.349686763 0 2.848306  
0.312203 0.6617645 3.082595 1.109377 0.539673044 0.3779642 2.295360307  
0.2940688 1.103846 0.2050208 1.913241 0.1100711 1.118582814 0.8999017

0.4045705 0.8758551 0.9957133 9.04959 2.150812 0.8763506 3.75561509  
1.210389 0.159634688 0.1470901 0.8303848 1.067728741 2.981983 1.804324  
0.5847642 0.85775386 0.3502757 1.545802 1.371598 0.500695803 1.491319  
0.2928313 0.1224396 0.2812968 1.310036 2.177737 0.5329475  
AC010326.3 4.470149 4.110804226 1.635658 2.98683687 3.146728963 2.341674378  
6.484646 2.654484655 1.222548 2.867058 3.898941412 3.404761 2.316607 6.061461  
3.431114 6.960205 1.973031 4.74049521 1.85493 3.399507 2.109066185 3.580885  
7.880466061 5.434291 4.876128 2.266595366 3.559798 1.610519 3.175383 6.084989  
4.712884 2.747543267 2.860537 8.252654647 2.855529 3.119276541 4.483096281  
4.241417603 2.746009 4.869921 2.162209423 5.042491 0.844974361 4.542553  
3.907128603 4.551525 6.844835 2.277093 1.279910782 0.9652609 4.838944  
16.22882 3.368354639 2.493072 1.958789953 6.97747 2.712014 6.402918 1.087493  
2.036999 1.884493 6.609758 10.911906959 1.964897 1.736636 2.544468 1.078798  
2.885115 4.769325 1.15267 2.88391 4.313155199 1.409056 2.226602 2.201252953  
2.103373 3.078961424 4.641163 1.799547 8.436298 1.776522 2.258803 4.757906  
1.712229112 6.073511827 1.687177 1.629887 5.858966 1.503644812 2.144887  
1.492614 1.612917 3.124975864 3.19261 2.459107 3.576349407 2.000948 7.053030992  
1.639613112 1.368947 1.127048144 0.7727213 2.485958 2.084984206 2.959166  
0.9269894 3.928786678 3.606381 5.235593711 2.67306395 1.218151 4.598703667  
2.650374 11.80326 3.90609 1.565751 2.143144 3.398799748 3.21639 4.606582  
2.857051 1.553215 1.334478 2.469958 3.943696 4.227766 2.785442 4.620296 6.850754  
6.122435144 4.334418493 2.476858 4.973563611 3.3077774 2.722016 5.291591743  
3.098711 1.779115 0.850872442 6.388528583 2.093141573 2.306015539 3.775112  
1.603708 5.192138 2.823925 6.767104 3.401672 3.418221813 2.81063 3.999319  
5.212539446 4.494241 2.809074 1.42193611 4.039246 2.597186 2.825691082 4.08344  
4.051628 2.585943208 4.060407 4.0247 1.511897 4.655821364 3.28144 4.365876  
1.493966473 1.080751 2.653012302 5.1908 0.9090569 1.841806006 2.611109  
4.997395665 4.136538 10.17986 1.295011 1.267036 1.166834 4.899301542 2.176528  
0.8238382 7.438575 4.53205 5.385112 1.07224 3.814172 2.942716 4.359863859  
2.50589622 11.06836 1.936303 4.590298 1.670067 5.105793959 4.051425 4.561460395  
3.270642 8.70734 1.574330009 2.293660328 2.157698 1.460607 2.105459233  
2.605102 1.650458 4.057427 3.779676 3.225424 3.695198 3.360497 0.9267571  
1.424199 4.731002 9.157688 1.088377 1.368262 4.264414531 5.541469 2.986638  
2.331782088 2.577072 4.635564 4.469709 5.264674 1.80529 5.682510231 4.676693  
2.666179 2.747772 0.3515753 2.656892 1.228256842 2.439036 3.260238 2.426778  
5.109859074 1.834984185 4.357811 1.373096 3.90111 3.898114112 3.067926  
4.104747 2.233321542 2.439425 4.145166 0.5745582 5.147486 2.169184 2.477687  
4.256692248 2.166841 1.177058547 2.178968 9.343284 4.598226 1.019811 4.108878  
1.125992 3.401972 4.055230149 4.383948 5.547747 1.045737507 3.856705 0.6603726  
2.527697 2.138833 4.770459 1.505977 2.149075 7.143299 5.531823362 0.5697427  
2.530943897 5.069575 3.794697 3.040284 3.438090608 4.233208543 12.02422 3.91139  
3.961594 2.535346 2.332915 2.090916997 1.668297 10.41438 1.327208 3.284649599  
2.413005 0.6749162 2.499927122 0.600731 1.816880415 2.169378 4.624749  
2.227400539 4.04684 3.194625 16.69645457 3.766431947 1.03188 1.283161

2.872985 3.241773 4.840588 4.234038 4.269422 4.041702 2.610133 2.37965736  
0.6465562 1.723371623 6.290982 2.196831382 3.632509 1.253065 2.922118134  
3.322902 1.443918 2.046015 1.497327013 1.638787 1.666437 1.122219016 3.851265039  
2.813657 2.466753 1.858618 6.890704429 3.472623508 13.033098852 1.820906  
2.232552 2.813395 1.481261 2.59375 2.282388 2.152509 1.524804 5.617092 1.767535  
2.32531 1.83205324 2.387904 7.126951 3.222123 2.18295 10.65016 3.36523  
2.241761 2.368209 1.951346 2.501863 3.212242885 7.679203 1.446816 2.918982  
1.451271 8.892908489 3.451613 7.668297 3.47665 2.260799 5.930881 2.127645  
1.450897 1.601393095 0.8719517 1.264948 1.610768928 1.983962 3.639025  
5.816792 1.415817 3.715769 1.532542138 6.890766558 3.37802 4.191656 5.876651  
0.943210522 3.516284645 2.50142665 2.345554 2.157897 2.248945 2.224535  
6.903537 0.9472424 1.472799 6.38190091 9.438893965 2.234868 3.330305322  
10.18823 3.023302091 4.843281 4.822008 2.09071 5.972584 4.033139 3.298037  
6.912106 1.700781 2.140984 4.229743709 3.912985 2.85087 1.015033 2.653307  
5.482675088 2.06966 2.960372 3.566857 2.389851534 2.422132 2.095848 2.253011  
1.200099 3.452885 1.992763 2.679845 5.063179087 4.923537565 6.148741268  
1.440458 2.105737019 0.931015186 3.661743 3.604686 5.767363227 2.284085  
1.662774 2.343 9.451677447 2.06693 1.733819 0.9741091 2.147028595  
1.870057 4.664741 1.260467 4.013886 2.329033 5.054785 2.058946 2.270154 7.737652  
2.94215 3.859998 0.795761256 2.260537 19.66262 2.556159 2.542041 1.822589  
1.915935 1.760894 0.651705468 1.184806844 1.68247148 0.9736943 3.68846  
1.364782 3.422743 4.399151 4.755300366 1.784411 6.859557 1.448351 0.6259907  
1.92397 1.118134497 2.988 6.024797 1.71052 2.337638 5.741148 6.730673  
5.832614 2.878934942 2.543294 2.877072 1.274634877 1.141577 3.947259 3.99078  
4.350278 2.463465 4.264375642 3.433880255 2.044795738 1.37263 6.143658  
1.690982 1.983368 5.520343 1.572892 4.220548714 3.575459 2.502528917 0.6668689  
1.596782 4.294163 4.816212 1.053916 3.326980459 2.79452 1.987824 1.572411 1.95838  
3.641264 4.320603 2.639086 2.729310444 4.950249 1.534643813 1.474385 1.225752  
2.865013786 6.264166 3.23928 2.099639 3.503305522 2.401047 3.579955 6.499767  
1.72182275 1.907745 1.604818 0.7993244 1.127461 2.671971 5.020364 0.7538376  
LINC00641 1.77033 4.534707185 1.114556 2.809664919 1.27900615 2.209072126  
1.158672 1.889437042 2.178767 0.843321 0.807191847 2.160791 2.558955 3.588961  
1.735272 2.09644 0.9160737 0.602061627 1.71349 3.132506 1.462678959  
2.352463 1.315386319 4.846135 1.433088 1.166942974 2.060356 0.3248433  
0.6416522 1.74474 2.013396 2.649892432 2.551253 1.910899756 2.259903  
2.260027768 1.920722514 2.387005845 6.2904 1.83366 1.407770478 3.685762  
0.78592226 3.163445 1.212563725 3.417927 1.30033 0.4795968 1.9588213  
1.00255 2.711004 2.386979 2.391246111 1.409077 0.898118457 2.264931 1.316878  
2.381175 0.9152036 1.335262 1.885901 1.802211 0.88494559 1.551543 0.7574855  
1.817326 0.663347 1.375756 5.301579 2.927282 4.129453 7.080726172 0.8147292  
1.423174 1.884562992 0.9726405 0.116095981 2.026391 2.686724 0.5901497  
2.267763 0.5983303 1.936583 2.388763658 3.160087763 0.4546004 0.2904707  
1.131496 2.18844123 2.349254 0.8147946 1.142688 6.828560557 1.593121  
1.797348 0.634564469 1.372367 1.413050252 1.09433269 0.880403 0.231290036

0.9321954 0.8002116 0.385978093 2.607093 1.645743 1.204943023 2.260261  
3.00233984 1.545423965 0.5604948 2.377002735 0.9878943 1.587399  
1.769886 0.6282801 1.461339 2.019059518 1.477607 4.241137 1.430525 2.068902  
1.946501 2.15434 0.9135437 1.000382 1.675969 1.68097 1.946376 2.354748411  
4.184415473 1.665764 1.284244036 1.854366099 1.99853 2.575743553 1.123852  
0.5222253 1.105696827 1.518044062 0.852021442 1.652087637 1.974741  
1.785927 1.68764 0.9186609 2.149039 6.396559 1.363067553 1.677545 2.620325  
1.817164169 2.025098 1.915874 1.889533852 3.408798 3.885823 0.855442366  
2.018424 0.7866364 1.048072207 2.053644 2.580686 2.645882 1.987480214  
2.061971 1.182536 0.551320722 1.775238 2.571221064 1.726815 1.980095 0.62565528  
0.7264465 4.872171438 1.054334 3.316522 0.6802253 1.725981 0.4555041  
0.958911322 1.519956 0.58012 3.898478 3.541659 2.122992 0.6201397 2.279043  
4.376232 2.984107815 1.665187897 2.109941 2.002078 2.595839 0.9848894  
2.571636092 1.264565 1.964035588 1.8862 1.526265 1.135241906 4.826874737  
0.8292024 0.6057947 3.599559955 0.7992907 0.9205389 2.707198  
4.481521 2.821054 4.221413 1.668961 1.21119 0.7529812 3.422733 2.876815  
0.8804097 2.412783 3.578589381 3.014956 1.949446 0.587864043 0.5598763  
2.527318 2.110571 0.9152748 0.9061465 2.816552739 1.591998 1.351709 1.03679  
0.2316376 1.133904 0.372268822 1.063758 0.6129485 0.5148677 3.29142452  
1.07263254 1.569759 1.516222 1.604619 3.679879485 3.07729 1.643936 1.387513696  
2.901469 1.780277 2.275445 1.921381 1.651114 0.8068037 5.270492215 2.005024  
0.543403547 2.453845 3.424861 2.531133 1.053933 2.81898 2.474917 1.878932  
0.466977805 1.489968 3.650918 0.539272823 2.601733 0.8412544 1.644154  
1.729394 0.5338267 0.7193531 2.111399 2.354871 2.251843969 1.247452  
2.317477826 1.997156 2.664565 2.883451 3.091122129 1.876944133 9.508831  
1.375843 2.203491 0.03256484 2.559783 0.932538568 1.583576 7.547736 0.863122  
1.001075336 1.699659 1.134953 0.966482955 1.239034 1.349148952 0.4914  
3.200998 1.215993892 1.857896 4.179584 0.36435458 2.081967767 0.7675692  
0.9946908 1.878803 4.862589 1.755602 1.602094 2.548004 1.101624 1.196661  
1.669003949 0.7201635 0.876347286 1.853633 0.977321955 3.736327 1.176127  
0.829651613 0.9434426 1.115088 1.044913 0.476765689 0.4737811 0.9171576  
0.410450359 2.399904666 0.784617 0.696347 2.285956 1.459672032 4.212075301  
1.785584254 0.4603023 1.532937 0.6414176 0.4211867 1.031538 1.545243  
0.6377311 0.9810629 3.061186 1.189245 1.543132 1.673311356 3.134965  
0.5654499 3.717972 0.8372709 23.41637 1.820473 1.686257 1.801276 1.761982  
0.6324397 2.993074541 2.021119 0.4899047 3.909661 0.8658772 1.253443764  
0.3032933 2.713336 2.236464 1.156058 2.669376 0.8703874 1.464227 1.402082756  
0.8155486 1.717915 1.240398029 0.5439571 3.221728 2.405911 2.814946  
2.664434 1.110039386 1.342656519 1.489491 3.088413 3.55515 0.768983914  
1.443814163 0.851423148 0.5715693 1.002981 3.916939 0.9785295 3.725272  
2.090912 1.330478 2.373052209 0.952724726 0.5618354 1.902832576 8.383038  
0.677924819 2.064046 1.795098 1.838142 4.029847 5.353203 2.23153 1.389318  
1.481847 0.8773943 1.572873915 3.389288 1.620506 0.8003201 1.153491  
3.039854733 2.027281 0.4855296 2.92544 1.113533182 1.252808 1.016154

1.017997 1.739525 4.40683 1.214108 0.8914999 1.282630284 2.131751936  
2.659785402 0.8943498 1.51986129 0.559049401 2.788796 2.072027 2.435565444  
1.579213 1.319381 0.8528311 2.021319366 0.8328102 1.010543 1.261501  
0.302462419 0.9032963 0.8456118 0.596529 0.8179995 1.106851 1.454213  
1.087485 2.107023 2.555686 1.841369 3.625385 1.734300913 1.47253 1.15413  
2.730493 2.321781 0.7037617 2.237579 0.5970771 0.647394342 0.780858882  
2.088130651 2.305231 3.122364 0.6977361 2.018222 3.441218 1.759599981  
3.572462 3.886125 2.285047 1.274275 0.3402227 1.40318298 1.878989 2.354945  
2.315942 2.190385 2.313813 4.248715 1.83919 4.68783988 1.262158 2.467904  
1.279812746 1.466387 1.994161 2.141372 1.83451 1.138218 2.530184909 2.372205266  
1.116683005 0.3986459 1.753153 3.399598 0.7395964 0.9346187 0.987771  
2.847823588 0.9054149 0.424184855 0.4324681 2.327384 1.803887 1.049061  
1.064335 3.361652403 2.075108 0.86597 1.410178 2.827277 0.30043 1.847185  
3.094499 1.496444983 5.649456 1.667342483 0.6353248 0.1062718 2.642329053  
3.101573 1.377732 1.26808 1.315006834 0.5252567 3.204849 4.187908 0.79722139  
0.9967865 0.8974578 0.2825294 0.3711636 1.329352 1.807885 1.639702  
FAM13A-AS1 0.09113546 1.422608923 0.3730045 1.107977402 1.550919847  
0.593608486 0.5873004 0.514856868 0.2052976 0.2933529 0.594032457  
2.419734 0.6535607 1.149174 0.8027763 1.602277 1.395346 0.67502854  
0.7365687 1.656547 0.638750264 1.465836 4.316305984 3.794716 1.675923  
0.991237604 1.19165 0.2481095 0.1505725 1.457651 0.3547725 0.667408971  
1.86525 1.750344949 0.7674466 1.566306757 1.656694298 1.982908514  
1.795128 2.093779 0.823590843 2.416137 0.352566021 0.6098858 1.076648494  
2.525768 2.291832 0.72461 0.271080957 0.3469029 1.716146 2.960886 1.860838326  
1.28689 0.481815471 2.260426 0.80951 3.400831 0.1882858 0.5128943  
0.1909644 1.227886 2.719368139 0.5688919 0.3760699 1.563145 0.2080086  
1.103526 2.73907 0.3167094 0.6822909 1.333295242 0.2651743 0.09335366  
1.150181225 0.5786667 0.07216961 3.029052 0.6626351 0.5222928  
0.5722466 0.5296212 0.6786221 0.417921728 2.585526351 0.480808  
0.3558105 0.9448633 1.128363948 0.5449309 0.1670212 0.2368358  
0.88449982 0.7638617 1.163577 1.264613469 1.022429 2.113318188 0.377536584  
0.3091512 0.289230633 0.4966675 0.8660475 0.372304017 1.830039  
0.6340114 0.435597698 2.122988 2.774791524 1.280207082 0.223412 2.441085716  
0.8332586 3.286594 2.640589 0.5292818 1.195945 1.436707378 2.012292  
1.100452 0.4639382 0.2568982 0.5563702 2.039343 1.618689 1.085809  
1.581588 1.511783 5.748993 2.865725353 1.257575513 0.6534333 2.046696783  
1.446044995 0.32977 2.655573388 1.862005 0.1142316 0.288230681 4.527103245  
0.194559456 0.895725974 0.5762533 1.765793 1.334608 2.019482 3.719064 1.54026  
2.046681763 1.126186 1.728879 1.574703665 3.944487 0.7120015 0.747628444  
3.024956 0.6090185 0.953104445 1.618146 1.091039 0.389324931 1.642687  
4.135166 0.4675491 1.398385692 2.089585 1.889742 0.224923112 0.3280061  
1.027727486 1.210319 0.3786528 0.687371366 0.8582984 2.15534605  
2.310117 4.643122 0.2804825 0.5525397 0.7277833 1.052066259 0.6480894  
0.4537771 2.910984 1.532817 0.6422839 0.08832986 2.037085 1.723345

2.372302043 0.096511828 1.753439 0.5594008 3.208628 0.635447 1.839387746  
1.959107 1.932475762 1.272357 1.199234 0.335585873 1.238390685 0.5735021  
0.4477978 0.745122914 1.542978 0.6764275 0.2272113 0.7741345  
1.333346 0.6811452 0.8987458 0.3219861 0.8549968 2.399681 3.023858  
0.5334159 0.3939255 1.135372376 2.333555 1.432222 0.415278145 0.4729775  
0.5933401 1.40626 1.827055 0.3450871 2.905774977 1.740463 0.6833073  
0.9955812 0.0192477 1.294758 0.286813729 0.2277616 1.181259 0.9460265  
2.16994106 0.265214211 2.02054 0.3769702 1.081726 1.177748235 2.051934  
1.276594 0.462324795 1.182516 2.504724 0.1838172 0.2572796 0.4701316  
1.266448 2.188609047 1.024737 0.394927937 0.8365351 4.386049 2.022064  
0.3216964 1.831569 0.7163713 1.513474 0.579223077 2.860097 4.365744  
0.144041128 2.450513 0.2126525 1.072475 0.6306039 2.083654 0.9393158  
0.4521439 1.62314 2.220906467 0.3839552 0.420462948 2.98986 1.945015  
0.8796336 2.309096501 1.283892334 5.984363 2.429696 2.260375 0.123797  
0.3718911 0.493988502 0.5370749 11.20199 0.3014781 0.989036398  
0.2594917 0.1602336 0.44507818 0.1591791 0.576386176 0.4975449  
3.863439 2.394107049 0.8675464 1.289213 2.97542773 1.422437067 0.297199  
0.3166976 1.501169 1.318709 2.250242 1.624812 1.427021 0.8883387 0.9384973  
0.951528204 0.1865719 0.47394885 0.6230041 0.529187941 1.86631  
0.1584696 0.831352519 1.066768 0.3410743 0.3172315 0.554555477  
0.1356996 0.1438924 0.265027333 1.508727284 0.1155295 0.6803689  
0.8864792 2.030619377 1.391228847 2.458427534 0.1749863 0.4015983  
0.8757571 0.2205045 0.4521582 0.4799818 0.4471338 0.4661952  
0.7782684 0.3933801 0.6591699 0.448213247 0.5752148 0.9073635  
1.22673 0.4965512 10.86558 1.616968 0.6727785 0.4665063 1.252446  
0.7132616 2.444741334 4.992647 0.4410943 1.425891 0.5581127 2.295198555  
2.019077 3.715375 1.555815 0.2402633 2.479166 0.2511648 0.3032444  
1.606074637 0.4441042 0.3105692 0.146702507 0.1975976 2.067771  
1.653272 0.7260673 1.822369 0.511499705 1.611481899 1.11027 2.123981  
0.9750364 0.12731431 1.668643132 2.605668999 0.6918529 0.7461546  
1.194361 1.487175 1.231661 0.3077405 0.4549416 2.174916827 4.030546446  
0.336469 1.294502635 9.80351 0.955218438 1.96957 2.037568 0.5823161  
4.168506 1.660755 0.6181845 2.081295 0.1054364 0.3223344 1.587880404  
4.38987 1.064611 0.6112702 1.933783 1.834312089 0.7501393 0.2664491  
1.00472 0.572555253 1.188296 0.6756997 0.2826671 0.3292394 1.252209  
0.4056259 0.9430931 2.448945278 2.630047033 4.49050715 0.4197429  
0.523095891 0.208358375 1.917739 1.524731 2.070337859 0.7986865 0.4172296  
0.6926703 1.578226278 0.4870725 0.2167074 0.1393235 0.535662212  
0.1523113 1.476995 0.1929315 0.5371625 0.8371673 0.8153783  
0.6475886 0.7361448 2.267744 0.3243675 1.892146 0.411830711 0.2552502  
0.9884451 1.179237 1.144159 0.3728242 0.6290714 0.2025561 0.087215179  
0.228862074 0.374109572 0.2288295 1.135418 0.2241532 2.722866 2.182978  
2.177982955 0.5012142 3.473023 0.1521318 0.2890199 0.582692 0.202534042  
0.1574497 4.7411 1.14009 2.677658 0.8101207 3.261759 2.302112 1.181683692

0.1694265 0.7568323 0.346175781 0.1643968 2.91454 1.246371 2.743495  
1.33244 1.482482986 2.2347116 0.588701044 0.2870215 2.093023 0.5606584  
0.2897352 1.246667 0.276786 1.146956434 0.6993981 0.261224807 0.251  
1.232063 0.5818544 1.059548 0.1218371 1.36278532 0.6836815 0.4565869  
1.137847 0.5965421 1.145907 2.187065 1.262273 0.88573823 1.655015 0.30063981  
0.3114276 0.05486391 1.126449621 2.84591 0.4917858 0.5953401  
0.99401738 0.1463165 2.665641 2.977105 0.785307928 0.721312 0.5415448  
0.105299 0.2157164 0.611796 1.735751 0.550007  
AC067852.3 0.03642511 0.647608215 0.2822442 1.360937767 0.220244315  
0.649738779 0.3170417 0.533153359 0.07356524 0.07621093 0.21002845  
0.6038147 0.2204008 1.424439 1.042777 0.8658201 0.4264713 0.429284873  
0.5894826 0.7104978 0.575523499 0.8147211 0.491651875 1.182676  
0.7277455 0.39401389 1.050089 0.1025453 0.1369117 1.026051 0.1666855  
0.749541571 0.8088904 0.577243753 0.9138111 0.860374757 0.247965329  
1.103315202 1.290737 0.5970166 0.608906073 1.33771 0.160525659 0.1153717  
0.416779481 0.4678819 1.031843 0.02024176 0.152728556 0.255754 1.084909  
0.2095481 1.546111597 0.2507433 0.302139568 0.852841 0.3597318  
0.6889337 0.1063375 0.6730992 0.3118415 0.3154904 0.466125718  
0.851293 0.334972 0.8579441 0.2590916 0.7167196 2.083812 0.2254213  
0.8642971 2.475977508 0.1928929 0.04409562 0.498014336 0.4734908  
0.274025783 1.207215 0.1780838 0.01541907 0.5009379 0.1882834  
1.077395 0.385586297 0.887409438 0.200328 0.06374962 0.6007971 0.70758084  
0.4369414 0.3076808 0.1713444 1.760067051 0.8774807 0.5839671  
0.220865381 0.2490182 0.162273246 0.320650145 0.3491966 0.090167983  
0.2208631 0.4522467 0.056895199 1.460124 0.5697567 0.142945352  
0.9553002 1.254716915 0.386922103 0.1559305 1.149675917 0.254078  
0.199894 0.1647611 0.2888729 0.3826775 0.869202975 0.1956925 1.03718  
0.03990984 0.06845155 0.7467946 1.104083 0.2499012 0.1945414  
1.003866 0.6907259 0.652407 0.644716728 2.052225734 0.1510928 0.220467914  
0.354588205 0.2328942 1.480145628 0.4996825 0.09209959 0.114400314  
0.549460932 0.163737688 0.766657182 0.2666004 0.711515 2.055562 0.355024  
0.9154384 1.730641 0.898994238 0.779045 1.619136 0.576758861 1.3672  
0.3963701 0.462041026 0.8306514 0.7101854 0.159405262 0.7835086  
0.2190249 0.26101612 0.7452739 0.9613295 0.4714792 1.226219122  
0.5133866 0.5793714 0.132803105 0.0469681 0.44305017 0.4164662  
0.4148183 0.588482542 0.3744695 1.644185846 0.2627391 1.504872  
0.1599526 0.2136097 0.1397089 0.514364277 0.3216034 0.1964799  
1.530752 1.74765 0.136771 0.03956456 0.5880219 0.8583592 1.260416463  
0.034190538 0.1938428 0.4912503 0.1282428 0.2731613 1.676073924  
0.1745779 0.615452107 0.8403787 0.9316022 0.231674402 1.392078327  
0.1354469 0.1661922 0.973234638 0.1007734 0.2420782 0.2322406  
1.238205 1.568037 1.528682 0.5061618 0.0836496 0.2437074 0.9582595  
0.3156874 0.1358603 0.2347223 0.930532899 3.207156 0.5912913  
0.077856021 0.1535951 0.2842845 0.4706781 0.3490113 0.2618129

1.312016271 0.8632135 0.2706556 0.5078411 0 0.2597969 0.088238004  
0.09660536 0.1961806 0.169497 1.066525085 0.086125871 1.283443 0.3159164  
0.2704015 1.151278106 0.8389066 0.3919496 0.291172298 0.6500666  
0.9859224 0.140454 0.6194865 0.2330853 0.3230317 1.895281644  
0.4187718 0.052615059 0.4504789 2.408329 0.9057193 0.1266278  
0.3781415 0.5895788 0.4675117 0.187080613 0.6339154 0.7079057  
0.034810068 0.7499735 0.2008929 0.3295518 0.9120823 0.1735689  
0.252442 0.6789184 1.233133 1.123209772 0.1591735 0.290150618 1.177788  
1.108993 0.4446362 1.42103419 0.287953176 1.797333 0.4697989 1.263282  
0.02680128 0.4562354 0.138400027 0.3679099 3.439731 0.2823227  
0.195501146 0.1938154 0.1116836 0.116404057 0.1315795 0.355317339  
0.03964984 1.688282 0.716810963 0.4731305 1.219936 2.53222233 0.67415837  
0.2632163 0.2221444 0.6421188 1.133841 0.8968237 0.5670189  
1.038043 0.6255679 0.1801586 0.500404882 0.1159065 0.134812135  
0.07655156 0.143207422 0.3676143 0.147033 0.302539034 0.09556494  
0.2434302 0.09555292 0.046851845 0.2563909 0.2108738 0.05163911  
0.737799951 0.2091865 0.223838 0.3314935 0.553655781 1.642170557  
0.615026482 0.1060737 0.2835116 0.04461083 0.1497233 0.213577  
0.2621444 0.1705131 0.08257778 1.002982 0.2705221 0.696461 0.462784282  
1.206389 0.08418798 1.438418 0.3341016 6.93448 0.7561374 0.7084224  
0.2164195 1.140825 0.353944 1.988477887 1.050572 0.05658916 2.02056  
0.3887062 0.486094289 0.02812555 0.6216717 1.081845 0.2080621  
1.391844 0.2553291 0.2136425 0.568534286 0.2975079 0.2131264  
0.684464534 0.1910117 0.7346211 0.6591459 0.311494 0.7193324  
0.194992609 0.386308969 0.5861847 2.104405 0.3869972 0.114491489  
0.5171207 0.158656311 0.280841 0.2782471 1.179281 0.1968039 0.9753932  
0.3899937 0.1092517 1.827722499 0.17969062 0.01266843 0.757864202  
6.187754 0.682852818 1.050128 0.6286758 0.3352724 1.442007 1.359692  
0.3289393 0.4651227 0.2217416 0.6674935 0.601591114 0.9544941  
0.1749111 0.5233297 0.3655835 1.575231943 0.7795227 0.2265432  
0.7907716 0.284486184 0.3920135 0.4885361 0.2670358 0.1147407  
1.800698 0.2868294 0.0393062 0.682881495 0.574018202 0.876943539  
0.2817025 0.391217069 0.14762719 1.995306 0.2685518 0.767273196  
0.7550435 0.4877693 0.03332419 0.952212617 0.2108964 0.07677136  
0.09525059 0.083976522 0.1798607 0.6207115 0.1232513 0.1635362  
0.2846726 1.059146 0.3827232 0.4932907 0.88775 0.8879883 0.9659584  
0.194528331 0.1524416 0.2620314 0.2568263 0.2796373 0.3564337  
0.2471352 0.1857267 0.134531046 0.209847104 0.232853218 0.2507971  
0.5538799 0.1132315 0.1487483 1.342096 1.053216788 0.1875049  
0.7458455 0.4347499 0.3264575 0.1400038 0.157167217 0.6678248  
0.940609 0.7317559 0.4335941 0.299404 2.656567 0.6165688 1.588302053  
0.3257166 0.6430322 0.224834789 0.1876611 1.141134 0.8857256  
0.5769103 0.4639231 1.415205797 1.213113784 0.350780254 0.01988428  
1.502759 0.6613922 0.5146084 0.2591 0.2077312 0.944785542 0.2347789



0.013050823 0.01086799 0.5353268 0.1559602 0.6936327 0.08097119  
1.289555416 0.2732545 0.1594863 0.4463824 0.7837929 0.02967092  
0.3725793 2.659959 0.632600031 2.281609 0.853358583 0.09467793 0  
1.483371027 1.975188 0.383287 0.3148048 1.475647921 0.1565198 1.335097  
1.437348 0.326823685 0.5002761 0.2380897 0.01563195 0.1102457 1.29547  
0.9904936 0.8769831  
NFYC-AS10.459168 1.321346852 0.3291677 1.375680052 0.773247309 0.63638865  
0.6015241 0.65451687 0.2460315 0.1904596 0.507432979 0.9277735  
0.6132067 2.399516 2.836624 1.207948 0.3970623 0.75192124 0.2706389  
0.3446777 0.552757286 0.7159244 2.101564607 1.404263 1.575237 0.73851329  
0.7684193 0.1055237 1.730914 0.6857606 0.7567368 0.520403606  
0.9023989 1.285001591 0.4559289 1.523988755 0.947765524 1.633613959  
1.551214 1.706548 1.488156336 2.823722 0.262357777 1.242632 0.638562273  
1.162578 1.535325 0.6665501 0.366717528 0.2130525 1.157166 1.266853  
1.714267384 0.8170834 0.377540136 1.604777 0.4556067 1.609495 0.09483601  
1.102585 0.2917265 1.064144 2.083543279 0.6570145 0.05745025 1.365496  
0.2666171 1.09846 2.3878 0.1971735 0.5879093 1.141931707 0.1984956  
0.2949467 0.747003992 0.3410706 0.215199108 1.895626 0.3665128  
0.4760078 0.2660583 0.05961605 0.7238547 0.313252025 2.725505451  
0.2182729 0.1230024 2.181531 0.586288894 0.5395592 0.1461312  
0.6171241 1.459013627 0.659861 1.201858 0.46403114 1.281256 0.667946308  
0.24262032 0.5030749 0.12371596 0.1913922 0.5468245 0.019515919  
1.594153 0.2238622 0.25742026 1.082888 2.484875839 0.533704505 0.2050317  
1.450213604 0.5856656 0.9795238 0.6319469 0.3567161 0.5719369  
1.538979346 1.006883 1.142564 0.1314209 0.316979 0.4544808 1.057252  
0.8335524 0.9294629 0.6326272 1.223217 2.613495 3.111863314 1.292527133  
0.4024223 0.693960024 1.094662341 0.6419432 1.381150024 0.5798381  
0.2316714 0.117723145 1.884734595 0.293032268 1.048806487 0.8757903  
0.568404 0.9854255 0.7847956 2.006929 0.6073618 1.114871459 0.783858  
1.609684 1.573494791 2.331452 0.5939349 0.360998398 1.223506 0.370032  
0.382749011 0.7442456 1.246255 0.419683595 3.140723 1.632266 0.5674064  
1.534919235 1.173996 1.17148 0.273320913 0.1588062 0.443920982 1.446399  
0.2561202 0.501165845 0.4904407 3.620519847 0.7968816 3.694013  
0.2743308 0.3692878 0.2779493 0.954823476 0.3990803 0.3073239  
1.825579 2.248014 0.7177924 0.08957023 1.322258 0.8732534 1.764336933  
0.187645997 0.8643834 0.6318987 0.5758589 0.9655018 1.29173258  
0.8429665 0.967782584 1.297182 0.581483 0.263498643 0.848896082 0.3216486  
0.3420388 0.682342611 0.3687126 1.097927 1.214847 0.8262793 0.7261116  
1.773294 0.663681 0.157812 0.114645 1.144774 3.098634 0.3914581 0.2222168  
1.192434236 1.209839 0.6826688 0.400586995 0.3161127 0.6435918 1.68369  
1.7718 0.546999 1.410577969 1.861171 0.5652255 0.9114971 0.06432065  
0.9145939 0.262313808 0.2112491 0.4470173 0.3313984 1.401852561  
0.088627452 1.292769 0.447002 0.6658257 1.035293863 1.333156 0.9462837  
0.505624924 2.373687 1.273835 0.1927114 0.3103521 0.4029572 0.3324144

2.047309119 0.6258823 0.257180664 0.6139083 3.698926 1.730906 0.3713715  
0.6485415 0.730968 0.4934265 1.196937917 1.711024 1.092701 0.152239883  
0.4735781 0.1698123 0.811842 0.4842326 0.5135045 0.7793231  
0.5655641 2.582269 1.73983452 0.4040321 0.272233091 1.67225 1.0554  
0.3724252 1.688034599 0.432128901 4.192286 1.016473 1.523408 0 0.4142533  
0.349576228 0.4714593 4.58756 0.2342927 0.661018695 0.2081164  
0.09403157 0.327412572 0.1257298 0.443988708 0.1468854 1.412765  
1.202906263 1.053416 0.5630145 0 1.271856178 0.3250339 0.3725279  
1.340973 0.9409472 1.042504 2.04684 2.209369 0.4523564 0.2471886  
1.13286682 0.2602322 0.27745568 0.9790613 0.334031807 0.7259116  
0.2521728 0.54482133 0.708053 0.1803606 0.2335298 0.168744405  
0.1429122 0.0986358 0.053139002 1.423555923 0.3556511 0.5718774  
0.6762593 1.257721454 1.129211165 2.361167739 0.1871223 0.3851052  
0.3213461 0.22106 0.4505501 0.2843401 0.2960985 0.3965561  
0.7044588 0.1391898 0.3035394 0.460864015 0.544627 0.2984035  
0.9370062 0.3247055 5.169112 0.893374 0.4123027 0.3385124 1.942823  
0.4606369 3.542734369 1.288988 0.5095373 1.02272 0.2920608 1.056005666  
0.246011 2.682371 1.538474 0.2141054 1.956501 0.2822079 0.4259552  
0.882529626 0.3136162 0.4073027 0.504247165 0.3316946 0.8504535  
1.083078 0.3650612 0.8686323 0.453334591 0.462243676 1.158548 2.429925  
1.68346 0.15708929 2.151207502 0.693874489 0.5779965 0.830354 0.517244  
0.3410866 1.481105 0.1605285 0.3474954 2.213981909 1.815478522  
0.299837 0.974846069 3.693139 0.377051409 0.9534964 1.552647 0.6816062  
2.374225 1.42947 0.7300842 1.106838 0.1208023 0.6743926 1.580825968  
1.947501 0.6862174 0.5199602 0.4975577 2.002393937 0.6910955  
0.9713469 0.9063609 0.40148471 0.7143538 0.4516013 0.34349  
0.1610092 1.783076 0.6288202 0.4044787 1.616247323 2.18174553  
2.884993181 0.2711824 0.40258022 0.313957908 0.3904976 0.9257795  
1.547535914 1.88609 0.4302316 0.1971797 2.086547227 0.3074479  
0.4213399 0.313655 0.135796059 0.5799327 0.8516539 0.2705732  
0.4038869 0.3398117 1.322424 0.7384493 0.1796189 1.090014 2.069992  
0.8099384 0.240214238 2.047146 1.671782 0.5002556 1.012487 0.2152878  
0.3445536 0.4061327 0.422602001 0.404891715 0.385470165 0.229406  
0.8880892 0.366207 0.8333743 0.8428116 2.329034529 0.4823778  
2.227908 0.2643594 0.2687518 0.252123 0.246114278 1.22841 1.4468  
0.9179554 0.7953788 1.495193 3.804164 1.256265 1.39048974 0.4710599  
0.5853584 0.23136526 0.3063154 1.53347 1.001103 1.871178 0.9823383  
1.466713584 1.359809227 0.375407647 0.2966966 1.479173 0.3670667  
0.4584212 0.8109865 0.4604167 0.747867266 0.6617691 0.255167955  
0.1677549 0.9640325 1.222195 0.9391838 0.212095 1.001290407 0.6678294  
0.5744153 0.4593479 0.4491065 0.1526637 0.7804951 1.871114  
0.862540955 0.7763906 0.327443873 0.3542833 0.04000155 1.061882778  
2.499048 0.9641373 0.4788804 0.921951932 0.3144623 1.597271 2.847512  
0.305742263 0.5148069 0.3675077 0.1045589 0.1418098 1.053036

1.198081 0.591264  
AC025287.3 0.4102005 0.348208092 0.3585984 0.959841788 0.314243151  
0.461128126 0.5149554 0.356518421 0 0.03772517 0.316418805 0.8311718  
0.5091361 1.284656 1.193958 1.21159 0.1407384 0.601330627 0.5970672  
0.1758517 0.232660065 0.8247157 0.524187106 1.461544 0.4347739  
0.682642827 0.8355377 0.2538046 0.03388632 0.8063656 0.5096267  
0.344209072 0.9954089 1.102145473 0.5117445 1.197390765 0.675099218  
1.017650197 1.077316 0.6238949 0.556779716 1.723365 0.130878264 0.5863309  
0.513482673 1.265361 0.4348468 0.2805564 0.323409237 0.08440051  
1.262242 1.784993 0.943201531 0.4826906 0.224343152 0.9287626 0.22373  
0.7742281 0.1473868 0.2379934 0.09823206 0.3340321 0.555210624  
0.2867851 0.09672513 1.109859 0.1795541 1.241742 1.16664 0.1952751  
0.4060813 1.666988673 0.1591399 0.07639721 0.292483808 0.8818649  
0.199898627 0.9295742 0.3526131 0.3739971 0.4479445 0.2509288  
0.9564524 0.140640364 0.567680436 0.1224971 0.1932848 0.3866207  
0.382101357 0.4844904 0.2186944 0.2428855 0.88093132 1.075881  
1.071258 0.382656988 0.5752437 0.187429378 0.294108129 0.08066603  
0.069430747 0.08055853 0.5484733 0 1.234008 0.6820126 0.16510521  
0.7499631 1.640634629 0.599041584 0.3301894 1.252940221 0.1760796  
0.6596634 0.7785121 0.2402316 0.5998591 0.620086565 0.387479  
0.5989835 0.05531615 0.1185947 0.2504221 0.7438906 0.5971898  
1.348199 0.8089457 0.8905725 1.856951 0.42552162 1.094016236 0.246375  
0.494311997 1.095843398 0.2593912 0.608502645 0.5157465 0.1772953  
0.180184128 0.997291699 0.271347295 1.125114648 0.3553034 0.6163623  
0.9439676 0.5467479 0.9654089 0.58928 0.905236295 0.6898583  
1.489772 0.604200621 1.48891 0.506008 0.444723454 1.015858 0.2491992  
0.405056938 0.8353575 0.5803632 0.339164659 1.045268 1.290791 0.2492097  
1.680548887 0.4282587 0.6339671 0.061356271 0.1394981 0.484799933  
0.1803855 0.2874749 0.316417208 0.5603113 1.673309024 0.5270792  
2.417132 0.123166 0.08882071 0.1613671 0.454313843 0.39331 0.1089307  
1.721218 0.8651041 0.853058 0.02741879 0.8678398 0.8111658 0.995517382  
0.039490868 0.7836254 0.461017 0.3635756 0.3292254 1.087401628  
0.4653266 1.246004453 0.550039 0.7408678 0.169003787 1.071921923  
0.2888203 0.3599173 0.92646319 0.3491869 0.1553367 0.7041387  
1.300141 0.8643977 1.252016 0.5940582 0.04830862 0.04825503 1.068646  
1.682891 0.1883062 0.3578649 0.730044114 1.496516 0.5496956 0.462474087  
0.3658997 0.9850657 1.164952 0.3628046 0.4948364 0.916031022  
0.9614234 0.4137531 0.1636935 0.08663388 0.4264173 0.067944633  
0.04184304 0.2913341 0.2349276 1.086936449 0.298432159 1.623588  
0.2463013 0.8700345 0.467210521 1.361445 0.2611794 0.441407905  
0.7266213 1.404475 0.06489106 0.9320607 0.1292251 0.3731092  
1.814166658 0.4145925 0.045578714 0.2953132 2.532571 0.7621782  
0.1755097 0.1637859 0.2953636 0.3322996 0.366400701 1.872478  
0.6398981 0.030154829 0.73827 0.174027 0.6920728 0.9662457 0.4886604

0.5414991 0.1867063 1.523899 0.614526367 0.3676982 0.206992504  
0.5165971 0.6356409 0.4299615 1.057499649 0.374166701 3.632933  
1.043517 1.367925 0 0.3719736 0.17438755 0.3848554 2.744485 0.4102413  
0.774200149 0.08759788 0.03518103 0.134449396 0.06513315 0.48368548  
0.05495579 1.703576 0.993520026 0.7451955 0.8454329 0 0.908446719  
0.304021 0.1425455 0.7198485 0.8871574 0.6617945 1.30984 0.8712965  
0.6444325 0.08323496 0.624217635 0.07302257 0.373706773 0.6820881  
0.363897396 0.6885456 0.2037919 0.378559598 0.5960506 0.1349604  
0.206936 0.689965897 0.1850859 0.06642659 0.029822187 0.692393101  
0.4096955 0.2674532 0.3022758 0.65155108 1.382674096 0.901623346  
0.2625377 0.1178865 0.05152655 0.1353396 0.2960238 0.2209497  
0.1846375 0.3815171 0.8826418 0.07811484 0.283916 0.36209868  
0.782106 0.2268912 0.983126 0.3215793 4.160404 0.2911188 0.7243475  
0.1199854 0.8351492 0.6492921 1.336907348 0.8400707 0.2941281  
0.9107487 0.4917232 0.860890343 0.5847419 1.511674 0.8590696  
0.06007915 1.04022 0.1310716 0.1156697 0.801360414 0.3268662  
0.2373744 0.269513344 0.1654672 0.795473 0.7736083 0.1798914  
0.6358512 0.050049112 0.435819208 0.8060202 1.187055 1.584786 0.044080112  
0.800618008 0.183251734 0.2595024 0.5463492 0.4354244 0.07178307  
0.9067771 0.574326 0.1720749 1.194257958 0.96226267 0.219485 1.107865859  
6.089244 0.057710554 0.8561802 0.6970898 0.2833517 1.498996 0.9993935  
0.7822141 1.242339 0 0.5466882 0.707259813 1.482623 0.03787994  
0.437711 0.6946817 0.825623505 0.7479971 1.00304 1.158407 0.2534823  
0.4244857 0.1721503 0.1850595 0.1445762 1.030113 0.3024864  
0.04539958 0.591558022 0.513293721 1.151011601 0.2519016 0.392408927  
0.136410274 0.805912 0.2791653 1.249567957 0.6191193 0.187795 0.08660299  
1.358610745 0.1217951 0.4876999 0.13202 0.207846082 0.3323893  
0.4562321 0.1993013 0.5288867 0.1578257 1.174405 0.2486555  
0.2629672 0.6641613 1.318689 1.066118 0.202216277 0.6074541 0.8625592  
0.5085263 0.6459753 0.2416437 0.2762389 0.1072594 0.049069418  
0.272675578 0.105241652 0.1609314 0.4909664 0.1681522 0.4008846  
1.597849 1.669438289 0.6497176 0.6819962 0.09129931 0.3959193  
0.2122413 0.189424482 0.9545496 0.5146225 0.6761561 0.5552473  
1.159509 3.049912 0.4272908 1.026786861 0.5185601 0.642736 0.237107728  
0.2242272 1.535125 0.7295404 1.239907 0.6801071 1.436109037 1.163475396  
0.29171474 0.1033506 1.006216 0.2317521 0.5056705 0.9726162  
0.4706405 0.647554531 0.212224 0.271332077 0.1882918 0.4250915  
0.6235536 0.7336956 0.05101288 0.934301736 0.2367115 0.1726972  
0.3780935 0.6172493 0.1028118 0.599399 0.825398 1.096001651 0.629955  
0.300706486 0.1491207 0 0.754236818 1.832591 0.4058133 0.4742698  
0.730460448 0.1033052 0.7522286 1.897337 0.720660755 0.4994806  
0.1874994 0.0541658 0.5093452 0.603549 1.08383 0.7073087  
AC093110.1 1.304585 1.06641076 0.6078449 1.793068736 0.564090427 1.297400178  
0.5009566 0.919616138 0.4132986 0.07645757 0.243688561 2.044677

0.5388632 2.288436 2.496209 1.91765 0.5562068 0.962144366 0.7642582  
1.58241 0.714034063 1.800024 1.327961874 2.021205 0.7225479 1.106809244  
1.802634 0.2469051 0.260974 1.426264 1.225661 0.849813616 1.157347 1.025855288  
1.490906 2.278174128 1.107016734 1.226333909 1.402666 1.264447 1.603551187  
2.420832 0.318301021 0.3889035 1.131733882 1.009774 0.8617191 0.02843017  
0.53627988 0.2736871 1.901954 2.734694 1.238707486 1.643491 0.484987785  
2.121891 0.3627467 1.569127 0.1891821 0.8875075 0.2189955 0.873923  
0.920654862 1.477977 0.3528589 0.6426714 0.7278042 0.7068001  
2.492235 0.7123751 0.8024296 7.441674807 0.2322206 0.3406351  
0.936587106 1.238623 0.141797024 0.6782282 0.5359805 0.2382221 0.83976  
0.3865035 1.05051 1.710214132 0.997115071 0.08275493 0.3469609 0.34959  
1.187420157 1.227395 0.1662104 0.2515974 2.046323192 1.289331 0.9890644  
0.43946731 0.5829229 0.493821821 0.490100897 0.4741087 0.436217203  
0.2612286 0.4922757 0.079911056 2.188343 0.9748389 0.552120639 2.00214  
1.91191675 0.925011045 0.3285137 1.315244131 0.8421904 0.855641  
0.3576369 0.2434385 0.9853843 0.915616726 0.4122843 1.251312  
0.1457419 0.1922846 0.6541502 1.076887 0.7019879 1.229577 0.8197448  
1.680834 1.309037 1.552327656 3.345142828 0.5867105 0.692167682 1.763295529  
0.3271071 2.149381567 0.7167517 0.3018323 0.861822433 1.047354334  
0.309965787 1.165470702 0.9793266 0.4470753 1.31021 0.7756655  
2.739231 3.58288 1.305833082 0.9847734 1.798743 1.394083509 1.426489  
1.650608 0.709038866 2.813747 0.8459617 0.850780448 0.9523228 0.2714357  
0.320779519 1.457987 1.18144 0.3030439 1.23385967 1.228485 0.9993359  
0.261136461 0.1413603 1.670324043 0.8481623 0.3329286 0.79804038  
0.621582 2.406203678 0.5244042 3.742902 0.5491648 0.6240445 0.2093072  
0.354137471 0.7174089 0.3090775 5.46752 2.051368 0.9028657 0.1889368  
3.318874 3.644175 2.369069474 0.112050545 1.225162 0.4887331 0.573112  
0.3169394 2.374132227 0.5092615 2.039646013 1.495095 1.051061 0.34251981  
2.766269708 0.4682815 0.2188332 1.336895378 0.6447903 0.365192  
0.3941452 1.285877 1.081157 1.951891 0.7567856 0.1762327 0.6943689  
1.933771 2.72857 0.1653773 0.5538536 1.306962065 4.20125 0.6684406  
0.515512681 0.2831444 1.197859 2.219346 0.5718966 0.768878 0.921383595  
3.160926 0.6596618 0.5971634 0.01755808 0.3840976 0.316717639  
0.0339213 0.4723572 0.3451925 1.875606079 0.040322144 1.917088  
0.7875928 1.831117 1.602437878 1.625714 0.9210377 0.664560722 1.133935  
2.10791 0.2893322 1.224992 0.6678461 0.890612 2.529617626 1.274386  
0.314072742 0.4788087 3.298429 1.417495 0.7825517 1.26139 0.4589367  
0.7408184 0.662613367 1.795303 1.404954 0.146675432 1.113211 0.4131633  
0.9678101 1.444238 0.3047285 0.3376787 0.7265233 4.602446 1.59418879  
0.5365538 0.647246324 0.3769153 1.709863 1.568525 2.625461053 0.808878177  
11.35984 0.9136344 1.996108 0 1.093124 0.265073309 0.6629881 3.591622  
0.3837396 1.431777004 0.5799462 0.313726 0.152593538 0.2640106  
0.499054127 0.100241 3.478693 1.037760976 0.9182545 1.661516 0.37437728  
1.665800647 0.1478782 0.2195616 1.565019 1.541144 1.574521 1.908821

1.313072 1.412931 0.7085073 1.279157955 0.1479948 0.391318763 0.8140726  
0.496143427 1.869936 0.4680947 0.613781096 0.1476463 0.1914669  
0.2516382 0.197414571 0.6001816 0.1884774 0.169233676 1.683926912  
0.2682603 0.6721384 0.5962855 1.599269729 2.284923156 2.259230961  
0.2341174 0.2389205 0.1253146 0.420582 0.3299731 0.7463309  
0.1796182 0.5283672 1.788849 0.8126851 0.6674783 0.649994752  
1.082236 0.6043613 2.761698 0.7951282 6.194856 0.4720081 0.6035252  
0.6930466 0.6319025 0.6725812 1.681284963 2.761948 0.3179249  
2.434167 0.6932695 1.001343748 0.0197516 1.57781 1.70942 0.2800534  
3.564795 0.199232 0.4219698 1.123347158 0.5299675 0.5559221 0.622693574  
0.2515142 2.09584 2.284612 0.6197958 1.62889 0.415881395 0.958983596  
0.784109 2.560462 1.449465 0.464553023 2.163482319 0.352826305 0.3287082  
0.6513443 1.031816 0.4073515 2.338973 0.4245126 0.4184928 2.112350352  
0.504762 0.4092435 2.062359421 4.414973 0.280708618 1.185733 1.006614  
0.7924908 2.815226 1.678247 0.9783643 1.320168 0.05496051 1.380704  
1.357960524 4.437902 0.4913359 0.4182083 0.9275647 1.487369206 1.16224  
0.4065721 3.322959 0.662143894 0.8603048 0.453566 0.5250839 0.6153261  
2.171239 0.3415558 0.1288158 0.959128055 1.37838675 2.071485636  
0.3446069 0.954353749 0.234993184 2.35545 1.037271 1.142318321 1.651437  
0.739459 0.2340243 1.510488729 0.2591842 0.3055119 0.2675648  
0.370692477 0.2863026 1.0039 0.542412 0.872828 1.215488 0.2380166  
0.974303 0.8953649 1.544421 1.959896 2.090351 0.587425197 0.6530324  
0.1288109 0.5926121 0.5673189 0.2829603 0.2575325 0.2825972  
0.218787673 0.528069937 0.51190357 0.3913915 1.628249 0.5566301  
0.371416 2.697021 1.432064444 0.6876529 2.109675 0.3330652 0.8482613  
0.2089296 0.374308753 1.102127 2.030344 1.252905 0.8737772 0.7420978  
2.865854 1.091147 2.563777134 0.5440291 2.014738 1.496557552 0.2999311  
1.527334 2.263725 0.9436268 0.4135117 2.427833635 2.221097486 0.433559853  
0.01396404 1.916939 0.8767578 0.172605 0.8794586 0.4039821 1.647788775  
0.716857 0.018330282 0.3358174 0.6265692 1.196355 0.6563223 0.2377918  
1.79475459 0.3837943 0.462007 2.229183 0.8131361 0.05556496 2.261399  
1.80666 1.221696015 2.272578 0.975106468 0.3868453 0.05459758 1.426703624  
5.745501 0.3738461 0.4037049 1.216062145 0.3035843 2.195339 2.252265  
0.653775574 0.3096437 0.6536084 0.1317333 0.1161326 0.8715387  
0.9884691 1.752058  
DLEU2 0.1827751 1.112951216 0.4704844 0.729296245 0.555329166 0.474028933  
0.4718659 0.467755369 0.488013 0.3851915 0.587132672 2.467769 0.5109653  
1.018952 0.5429132 0.8043348 0.5216048 0.320043569 0.4350116  
0.6284348 0.44052416 1.046363 0.79768273 0.8721992 0.7341827  
0.670201952 0.6006789 0.3189493 0.5456076 0.86364 0.3936 0.516120449  
0.6738005 1.001906798 0.5495199 0.738928978 1.253286647 0.818185131  
1.060887 0.7318059 0.796932853 0.7876354 0.472212009 0.6515258  
0.790845576 0.4697448 0.7494852 0.6817224 0.626370976 0.3687374  
0.7650948 0.6059362 0.474118187 0.7440133 0.447851008 0.7543373

|             |             |             |             |             |             |             |
|-------------|-------------|-------------|-------------|-------------|-------------|-------------|
| 0.5585452   | 0.9184761   | 0.5088642   | 0.9299513   | 0.5352521   | 0.93017     |             |
| 0.743307473 | 0.5711617   | 0.3007141   | 0.4397444   | 0.7580117   | 0.7210915   |             |
| 0.9782151   | 0.586652    | 0.5731035   | 1.477311953 | 0.315604    | 0.3150206   | 0.623122911 |
| 0.5396107   | 0.323821674 | 0.4989061   | 0.4096545   | 0.2307996   | 0.6211905   |             |
| 0.4582217   | 0.8148283   | 0.869886694 | 1.077513758 | 0.5933057   | 0.4093443   |             |
| 0.3036598   | 0.653364868 | 0.4905252   | 0.7890549   | 0.4159785   | 0.841591579 |             |
| 0.5465065   | 0.6368837   | 0.234802017 | 1.569226    | 1.076479313 | 0.330456197 |             |
| 0.4751756   | 0.408992405 | 0.3638158   | 2.053907    | 0.445171764 | 0.7299401   |             |
| 0.7013003   | 0.676751793 | 0.5915752   | 1.038923921 | 0.725353311 | 0.2858606   |             |
| 1.236414155 | 0.5289841   | 0.832219    | 1.630558    | 0.286955    | 0.709812    | 0.743588311 |
| 0.789366    | 0.6559212   | 0.6299732   | 0.4337143   | 0.4562037   | 0.6677335   |             |
| 0.9615423   | 1.796353    | 0.5215267   | 0.7595848   | 0.9828934   | 1.347297509 |             |
| 0.754189732 | 0.6409952   | 0.997077837 | 1.219321735 | 0.3395518   | 0.674223179 |             |
| 1.605844    | 0.1914706   | 0.796051571 | 0.774392127 | 0.57155361  | 1.113814995 |             |
| 0.3732461   | 0.5159524   | 0.5139329   | 0.4249538   | 1.30663     | 0.4594293   |             |
| 0.67962375  | 0.4741001   | 0.8308935   | 0.866969009 | 0.8947838   | 0.5937778   |             |
| 0.512299109 | 0.8311206   | 0.5810619   | 0.54228402  | 0.5535901   | 0.9642537   |             |
| 0.391255645 | 0.5523468   | 0.7440084   | 0.5600179   | 0.815621621 | 0.5498242   |             |
| 0.5774612   | 0.481904636 | 0.4679322   | 0.575123966 | 0.6056755   | 0.4072259   |             |
| 0.690334754 | 0.6543294   | 1.329896789 | 0.6586025   | 1.634493    | 0.2509117   |             |
| 0.6307611   | 0.592514    | 0.727378795 | 0.7433236   | 0.4144136   | 1.158754    | 1.078659    |
| 0.1488909   | 0.2880344   | 0.7631169   | 0.7101078   | 1.16339094  | 0.252012564 |             |
| 1.373829    | 0.5605464   | 0.5393905   | 0.5414025   | 0.817672441 | 0.4202985   |             |
| 0.903357455 | 0.7655503   | 0.2961418   | 0.421031553 | 0.764734265 | 0.5068576   |             |
| 0.5406377   | 0.53483233  | 0.3999603   | 0.5734215   | 0.4049079   | 0.8501133   |             |
| 0.6789155   | 0.7974029   | 0.9248388   | 0.611824    | 0.2037151   | 0.7756368   |             |
| 1.916576    | 0.3759113   | 0.2842684   | 1.057190572 | 1.322319    | 0.8831089   | 0.472964265 |
| 0.5290498   | 0.3911436   | 0.7662931   | 0.9063123   | 0.5128081   | 0.965954284 |             |
| 0.6572354   | 0.4847471   | 0.6388232   | 0.1063188   | 0.7210015   | 0.376890995 |             |
| 0.6408553   | 0.8771422   | 0.6256278   | 0.997001974 | 0.673884727 | 0.8062399   |             |
| 0.3815265   | 1.074294    | 0.860936749 | 0.7441798   | 0.8513127   | 0.560277011 |             |
| 0.7526148   | 0.7378865   | 0.2739463   | 0.9760793   | 0.4472169   | 0.6186559   |             |
| 0.947547458 | 0.7733698   | 0.50117829  | 0.7434664   | 1.182067    | 1.162047    | 0.4480089   |
| 0.8147247   | 0.6258751   | 0.5790824   | 1.021060481 | 0.8661472   | 1.130825    |             |
| 0.346381664 | 0.6175427   | 0.3612372   | 0.4620329   | 0.4466496   | 0.3874942   |             |
| 2.040643    | 0.6708915   | 1.06489     | 0.856724179 | 0.3501672   | 0.661917071 | 1.039724    |
| 0.5559777   | 0.3482537   | 0.892226473 | 0.685715656 | 8.509186    | 0.8318932   |             |
| 0.6177779   | 0.06382307  | 0.5934411   | 0.522188704 | 0.4274333   | 11.02422    |             |
| 0.371783    | 0.89310655  | 0.3239388   | 0.4006625   | 0.512156559 | 0.3900714   |             |
| 0.52235757  | 0.253585    | 0.9309358   | 0.588999719 | 0.4155571   | 0.7118095   |             |
| 1.72288378  | 0.696524138 | 0.2686323   | 0.3442713   | 0.52041     | 1.09081     | 0.7740304   |
| 0.7501485   | 0.8225168   | 0.949032    | 0.6414866   | 0.704767764 | 0.5412728   |             |
| 0.687930236 | 0.3422693   | 0.402735679 | 0.5712176   | 0.5502141   | 0.488876518 |             |
| 0.7249827   | 0.5631286   | 0.5526079   | 0.442296844 | 0.70868     | 0.5412927   |             |

|             |             |             |             |             |             |
|-------------|-------------|-------------|-------------|-------------|-------------|
| 0.401118064 | 0.695461637 | 0.2970307   | 0.6091832   | 0.4866979   | 0.920423897 |
| 0.697011433 | 1.146725539 | 0.3505442   | 0.4706681   | 1.98303     | 0.3831173   |
| 0.3523875   | 0.5953331   | 0.6562066   | 0.399535    | 0.7961483   | 0.2812012   |
| 0.3623643   | 0.462149461 | 0.5083713   | 0.5218859   | 0.6195295   | 0.6693235   |
| 11.76193    | 2.619955    | 0.33977     | 0.5242042   | 0.7324699   | 0.612669    |
| 1.443331    | 0.5438459   | 0.5644326   | 0.4911576   | 1.223704032 | 0.4162118   |
| 1.161328    | 0.8766388   | 0.3332609   | 0.92842     | 0.3989168   | 0.6109618   |
| 0.3554686   | 0.4272552   | 0.555663315 | 0.4426807   | 0.5935416   | 0.8897113   |
| 0.8065326   | 0.7940627   | 0.555247967 | 0.556239565 | 1.478206    | 0.8199573   |
| 1.111075    | 0.320248102 | 0.939489517 | 0.904058047 | 0.4713301   | 0.3880955   |
| 0.3978936   | 0.6730348   | 0.7931331   | 0.5572256   | 0.4764077   | 0.987736625 |
| 0.866924891 | 0.5602608   | 0.74928755  | 11.7292     | 0.997194948 | 0.9071223   |
| 0.6843856   | 0.3699898   | 1.358849    | 1.107332    | 0.3620376   | 0.7614868   |
| 0.6027835   | 0.716297787 | 1.819503    | 1.349982    | 0.4235948   | 0.9468062   |
| 0.3529032   | 0.4195934   | 0.7545521   | 0.450717989 | 0.4306413   | 0.3239415   |
| 0.2816147   | 0.4932462   | 0.9275433   | 0.6278872   | 0.4412647   | 0.967961882 |
| 1.108666156 | 1.500686355 | 0.5533579   | 0.56037446  | 0.274544722 | 1.020263    |
| 1.662737    | 0.939672853 | 0.8078339   | 0.2844604   | 0.5724996   | 0.933695451 |
| 0.5440684   | 0.3046984   | 0.3110735   | 0.5591194   | 0.1223744   | 0.3679322   |
| 0.3633856   | 0.259624    | 0.6856511   | 0.4467883   | 0.7730588   | 0.7022352   |
| 1.122225    | 0.5825955   | 0.8933361   | 0.377208846 | 0.3785739   | 1.337115    |
| 0.6623894   | 0.5641036   | 0.5261369   | 0.3106486   | 0.488977762 | 0.68413802  |
| 0.599277274 | 0.4518757   | 0.8457239   | 0.4319795   | 0.5959906   | 0.873337    |
| 0.68228701  | 0.5599141   | 0.5779422   | 0.4571406   | 0.6885612   | 1.354426    |
| 0.416113025 | 0.8263989   | 0.8420729   | 0.6069334   | 0.3270769   | 0.7339541   |
| 1.437278    | 1.065539    | 0.919363586 | 0.4162719   | 0.7193656   | 0.535409045 |
| 0.5663222   | 0.8792523   | 0.5862965   | 0.643432    | 0.828767589 | 0.784851099 |
| 0.286398363 | 0.3754283   | 0.9236657   | 0.4500008   | 0.3318409   | 0.5472258   |
| 0.2989821   | 0.660476858 | 0.4549113   | 0.439538824 | 0.4584533   | 0.5918703   |
| 0.5632145   | 0.4222591   | 0.5133527   | 0.685961789 | 0.6274733   | 0.6544625   |
| 0.6276704   | 0.4999502   | 0.2826267   | 0.8329188   | 0.6212725   | 0.702107936 |
| 0.8813259   | 0.531407228 | 1.077527    | 0.3438267   | 0.803570051 | 1.567868    |
| 0.3957825   | 0.540422332 | 0.469079    | 0.945305    | 0.7351245   | 0.400931978 |
| 0.3902545   | 0.156877    | 0.5375673   | 0.9332656   | 0.6709603   | 0.2263289   |
| LINC00571   | 1.002229    | 0.7373299   | 0.4279868   | 0.600902092 | 0.152093533 |
| 0.2471612   | 0.727475111 | 0.2159075   | 0.2396489   | 0.335008076 | 0.3034491   |
| 0.5510261   | 2.075984    | 1.037894    | 0.3787224   | 0.2086092   | 0.549536522 |
| 0.5362066   | 0.295594318 | 0.2149334   | 0.49948429  | 0.3034134   | 0.2393646   |
| 0.268449024 | 0.7533578   | 0.8813864   | 0.7605947   | 0.7450811   | 1.496398    |
| 0.437317189 | 0.2884325   | 0.414896126 | 0.4063567   | 0.496745616 | 0.350882468 |
| 0.337790768 | 0.8433579   | 0.3754695   | 0.55846415  | 0.6795103   | 0.540412174 |
| 1.772037    | 0.366963235 | 0.5861185   | 0.3887768   | 0.05940776  | 0.348634809 |
| 0.4825383   | 0.6972507   | 0.1665639   | 0.335534178 | 0.286187    | 0.427541536 |
| 0.5006025   | 0.62264     | 0.3005615   | 0.9258706   | 0.5442666   | 0.4576136   |



0.6430112 0.342009403 0.3296591 0.4096305 0.3525186 0.5974656  
1.309098 0.8546102 0.4134947 1.483287 0.545949359 0.5391653 1.067688  
0.371600307 1.259374 0.201060337 0.2230821 0.5475488 0.56567 0.4742607  
1.317726 0.3527917 1.250783827 0.240412425 0.06916997 0.3040366  
0.503796 0.633794073 0.3077722 1.192444 0.4914514 0.573960064 0.4952554  
0.7813329 0.108036715 3.097397 0.158752525 0.387503412 0.5807545  
0.896818702 0.2558738 0.1825043 0.08349118 0.8622931 1.520169  
0.437012417 0.613314 1.181173722 0.181209898 1.334789 0.285718275 0.3877621  
0.2095254 0.2197997 0.7799911 0.3476338 0.731546395 0.06153645  
0.7805208 0.1756978 0.2385678 0.3888634 0.9788661 0.3793644  
13.6623 0.4682038 0.6128802 0.8889941 0.270312339 1.027351569  
0.3260617 0.057092979 0.590659002 0.5492603 0.386550919 0.7176605  
0.3153548 0.01526158 0.115187076 0.428321278 0.450014157 1.564897 0.50832  
0.4482268 0.4823907 0.2920359 0.4110397 0.270612133 1.194024  
1.127598 0.31492764 1.031814 0.7857453 0.46457248 0.2151078 0.3429912  
0.218325472 0.4201061 0.3025028 0.610453381 0.6509859 0.599551  
0.5277011 0.657997649 0.5580534 0.3579797 0.389765325 0.04923115  
0.941015932 0.550031 0.1565299 0.50623187 0.9491665 0.911115854  
0.3246804 0.517578 0.0782411 0.3385398 0.09567443 0.266402382  
0.5968637 0.2998585 0.4016582 0.5495568 1.966913 0.2902962  
0.5113458 0.629802 0.489601383 1.020186317 0.4740929 0.420518 0.1197576  
0.2439969 0.617507583 0.0985328 0.740784851 0.383668 0.06723369  
0.348918532 0.48422238 0.1376047 0.7773667 0.517910936 0.01643117  
0.3947101 0.9514079 0.5285848 1.485207 1.672258 0.3114842 0.2455042  
0.3576298 0.630367 0.6592507 0.3322816 0.5097781 0.721404538  
1.854376 0.1481428 0.359072231 0.4648751 2.187851 0.3453496 0.6658062  
0.360914 0.215521528 0.5428832 1.016301 0.1733103 0.8622012 0.5016321  
0.158259878 0.3012487 0.5757726 1.218774 0.447165209 0.547672203  
0.4683576 0.3940543 0.3259447 0.441387715 0.4519074 0.2875843  
0.680981365 0.400041 0.4340392 0.3847387 0.1196143 0.5746312  
0.3160232 0.445613312 0.5998975 0.308841059 1.286383 0.369236 0.8164489  
0.6503724 0.1387265 0.8026375 0.2462753 0.011936196 0.381247  
0.5871592 0.5108223 0.3501759 0.6527746 0.4396388 0.349529  
0.2069475 3.263466 0.5851184 0.6453704 0.36435232 0.2647241  
0.375691019 0.8532367 0.5016791 0.4248732 0.727757314 0.176066044  
13.05566 0.07070862 0.8544907 0 0.4594644 0.720067274 0.4074652  
5.512568 0.4543892 0.450825974 0.3215131 0.6704618 0.876864641  
0.6758046 0.819362385 0.4072907 0.4083756 0.517852691 0.8205339  
0.4339884 0 0.604570688 0.4120088 0.3018398 0.4988545 0.6440756  
0.5483537 0.2905659 1.286747 0.1488638 0.1586249 0.425906735  
0.3865628 0.356095486 1.749232 1.218873112 0.4228182 0.4746817  
0.271310481 0.1823085 0.4715344 0.2103295 0.206259011 0.8308685  
0.2672505 0.745151344 0.293228186 1.174501 0.215206 1.348411 0.321920208  
0.979690094 0.347124642 0.28908 0.2329828 0.5673582 0.2006069

0.2977441 0.8837366 0.5786348 0.52511 0.4438856 0.6395776  
0.3847626 0.525766758 0.6510217 0.2470843 0.5519104 0.3677095  
3.847478 2.424677 0.6135217 0.2159585 0.4244224 0.1069347 0.421005416  
0.2767097 0.2906473 0.337489 0.6247337 0.301180314 0.165092 0.3200967  
0.8819773 0.8141918 1.00121 0.5828419 0.7445882 0.268672506  
0.9689938 0.4803002 1.301182176 0.3328576 0.7411414 0.2808195  
0.3682224 0.5601081 1.738053777 0.87011218 0.846546 0.7899844  
1.540217 0.354690266 0.40364451 0.523847465 0.5082835 0.748578 0.3262498  
0.07600025 0.6109405 0.3576865 0.5684145 0.720335873 0.047943275  
0.8551564 0.330164212 4.903338 0.733211858 1.012236 0.7380431 0.7079961  
0.3174121 0.4491556 2.072787 0.8105244 0.1339866 0.5699009  
0.599048464 0.62789 0.9144019 0.3575001 0.4672547 0.718727478  
0.6511516 0.8495741 0.3773731 0.155060601 0.2157234 0.6075467  
0.626981 0.1377629 0.6107536 0.3385575 0.1730403 0.150314743  
0.190207215 0.272973639 0.4267209 0.43812413 0.317733313 0.8263134  
1.221673 0.641785438 1.226404 0.4771866 0.3789887 0.526053556 0.1676356  
0.5445164 0.4472832 0.299277274 0.4047044 0.3036222 0.3376161  
0.2719797 0.3341956 0.8289335 0.8892464 0.4677393 0.1184303  
1.2366 0.3150002 0.742200402 1.398133 0.07690388 0.4307213 0.699124  
0.34112 0.3392625 0.4542429 0.87279687 0.70569884 0.341701763  
0.5043425 0.5481635 0.5578304 0.09701398 0.6867881 0.460376267  
0.3057279 0.5776502 0.4543163 0.4790619 0.07704351 0.47129948  
1.225004 0.2615309 0.5011157 0.4149653 2.89462 0.4109753 0.3438192  
1.113200132 0.2583647 0.09073281 0.286900065 0.4273206 1.733666  
0.4581132 0.7072779 1.073548 0.519187926 0.603993253 0 0.3501516  
0.7776907 0.2617251 0.8227917 0.6020114 0.7738152 0.685597675  
0.1797536 0.440484577 0.4784489 0.5728103 5.281494 1.210736 0.01080197  
0.670929531 0.3508652 0.5119604 0.7714991 0.4051775 0.07256793  
0.351478 0.5592891 0.45255233 0.4401963 0.679195037 0.2147187  
0.1521163 1.147542238 1.298782 0.687447 0.6829004 0.91700087 0.3828099  
0.3344969 1.190934 0.159866418 2.214842 1.016396 0.8028717 0.3505247  
0.8307089 0.5992522 0.5325243  
AL354836.1 1.71781 10.75916987 1.415006 5.771919707 8.35562452 2.534352531  
2.424601 3.62429459 0.4219469 1.443196 1.047527455 1.686838 3.641582  
6.068531 2.658239 11.82094 2.795547 2.072241387 2.173142 1.009095 4.083484306  
5.087191 16.630528699 2.909454 6.684985 3.515460197 4.362321 0.8962546  
0.7478875 3.181866 2.59947 3.407077062 5.530831 7.447619008 1.670637  
5.429219263 9.526820645 6.596370045 5.619991 4.758989 3.837429592 7.322928  
0.698065456 1.764628 3.045693067 8.203594 19.72774 1.702804 1.838523875  
0.962426 6.096524 37.94893 16.098414144 3.231476 3.63099886 6.584283 1.011079  
10.18136 1.301159 2.906455 2.493234 6.277584 6.015485868 1.808425 0.7115902  
1.982939 0.6982157 6.161455 10.55449 0.8906955 2.912784 8.143129514  
1.123934 0.7306535 4.626269216 1.73509 1.0294339 9.574205 2.745437 18.4739  
1.359373 1.218387 4.630442 0.594933521 18.932684395 1.622142 3.636162 3.19437

3.912050205 2.472742 0.5228916 1.350077 4.162706469 2.047594 4.07188  
5.184552667 2.56941 10.962141587 2.812813865 1.720994 1.047119653 1.452005  
4.15031 5.946509098 8.102459 0.8978594 1.062819331 2.853802 3.922706805  
1.04929667 0.8170767 10.683038474 2.772129 26.93432 12.60024 3.77033  
3.530448 5.930431425 9.121973 8.389525 0.6104271 2.879187 2.026544 4.495412  
11.70847 4.038234 5.752899 10.38049 10.21625 17.530740909 6.001373686 1.993793  
11.736198146 4.73943858 2.692818 4.092936605 3.252221 1.721717 0.954420244  
14.707156941 1.814777665 2.391212824 1.594483 1.837654 3.409171 5.128472  
13.24081 6.859867 6.052462883 1.875606 7.438806 6.393961773 5.277671 2.65901  
4.362338726 6.912983 1.970814 1.598328398 6.068762 4.893655 1.164415524  
3.460435 4.901228 1.792651 3.895671839 2.641678 5.389496 1.331593264 0.7868019  
1.872459655 2.83992 3.474484 1.965720609 3.753293 14.06885372 6.380465  
25.81448 1.449777 2.548411 0.9497198 7.27594935 1.663771 0.9215917  
12.58518 5.441581 2.928707 0.8472045 8.744055 6.042202 6.378837398 0.871582591  
11.44764 2.400225 18.45587 3.935839 4.363541974 4.313393 7.721131967 4.641622  
6.034413 2.237997281 6.361329312 5.843204 1.006183 5.752560957 5.194903  
2.651262 1.011378 7.231075 3.742858 3.873286 1.935456 0.9240353 1.366765 4.68903  
10.46172 1.639315 1.98653 5.147025406 2.813568 8.124796 1.275878401 3.083405  
3.317497 5.884974 0.7414141 4.793228 22.613366897 16.94907 0.9537587  
8.520174 0.5736155 1.742821 2.724220598 1.63151 3.750766 1.274638 7.767936007  
1.097757059 7.166674 1.087198 5.711389 7.746891907 6.009552 6.398434 2.296348925  
4.623968 4.523951 1.670873 14.62829 2.281649 3.84286 16.763219598 2.440069  
2.615455204 2.6226 19.21202 7.982034 1.145935 10.80434 2.136724 4.064266  
3.649355952 12.63637 10.86676 1.619460463 7.408328 1.079099 7.000759 1.658651  
3.207838 0.949963 3.626215 16.70668 13.412195887 1.650106 3.567722272 4.104557  
3.932344 3.37403 3.841297597 7.401651039 0.9927121 1.934597 8.201827  
19.53998 2.326064 1.15464532 0.8670902 10.44148 1.601901 5.588863903  
3.114806 1.734099 3.75866021 1.102099 1.229262336 1.799136 2.861288 6.634464802  
3.026216 5.013459 2.37820278 7.988118548 1.789304 1.300367 4.068139 4.413268  
6.477499 12.77953 4.207576 10.06381 3.980245 13.26653436 1.235593 1.328826652  
6.35614 0.608438778 6.053287 0.9995078 5.098688507 3.215697 1.613431  
2.862098 2.478263098 1.007618 0.4642545 1.031164535 2.037526836 2.596728  
2.557889 2.208966 6.31124332 4.929554106 17.728435332 3.206198 1.792359  
0.1137216 1.211398 2.150573 1.715794 2.200521 1.23965 3.774314 0.8045484  
3.174856 1.446115935 5.77366 3.123788 6.223477 3.666996 9.494534 2.141711  
1.391435 1.235796 5.406763 2.733351 5.069012646 15.2103 1.514695 2.659151  
1.588564 8.481278619 7.169743 57.21821 9.250222 0.9281832 9.531111 1.253552  
2.161444 2.06341481 0.8693909 1.203022 1.566383061 6.269166 7.139633  
7.344492 2.051317 2.058253 0.883686523 7.099547003 2.300744 5.551668 8.983405  
1.07015637 6.815581998 4.314084871 2.505712 2.884508 4.607886 4.726457  
8.035527 1.168149 1.088696 10.569764836 5.954857428 0.9042393 3.803510099  
7.066652 3.014423084 2.571998 8.077182 1.959496 18.60032 5.056628 2.466264  
6.200156 3.258569 2.196571 5.860433848 6.460537 0.1114705 1.38007 1.503133  
4.622966269 1.070006 4.523767 5.408322 2.880119742 2.768943 1.097616 5.003333

2.526103 5.001722 2.19355 8.884317 12.417680226 8.118859499 12.29523776  
1.158248 2.466974503 1.480231748 7.021132 0.4107542 3.735820519 6.170958  
1.085523 0.9132101 9.538148541 1.523244 2.185372 2.573808 4.097955606  
6.724661 2.828984 0.9006815 10.28317 0.9579046 3.419959 1.727687 1.644414  
11.72669 2.61013 6.821798 0.619862671 1.20467 4.408591 3.156587 5.042749  
1.066639 1.585149 1.400632 0.68589103 0.534940635 2.658240323 0.6630091  
7.782123 1.154596 9.31117 6.491622 5.284017616 1.460513 9.321669 2.451608  
0.9154233 4.371983 0.923235732 1.425772 34.62918 1.81209 6.103259 5.903873  
11.85118 24.14212 6.889151808 2.244093 5.453535 1.470246978 0.4783843  
4.175228 5.681727 6.254939 1.842172 5.308372523 6.764757114 2.789923794  
0.3294776 10.08598 2.405888 0.9594023 5.449089 3.645726 5.399140421 3.74711  
2.162488766 0.08311381 8.64279 7.278638 7.519517 0.5254102 6.096493303  
6.965783 2.312317 2.35169 7.152071 2.218682 9.769127 4.959054 5.624009351  
11.53983 2.304422865 0.2413523 0.8918406 3.596438406 13.70217 4.206839  
2.686624 3.512209213 1.082998 4.593234 6.555455 2.650888679 1.794066 0.8000525  
0.8368258 1.311508 1.49857 11.00793 1.638154  
N4BP2L2-IT2 0.1648739 0.95530546 0.217099 0.487422458 0.703700854 0.550258485  
0.3095209 0.431679582 0.189344 0.1661991 0.298248989 1.092357 0.2289377  
1.091045 0.5890952 1.397965 0.6632834 0.246434883 0.2768834 0.526088  
0.255395909 0.848204 1.624578045 1.312436 1.238332 0.444615265 0.3755538  
0.1404178 0.09721009 0.7285174 0.2923944 0.317390328 0.7219366  
1.296479689 0.452211 0.756093726 1.244998926 1.115888622 0.9298283 2.00845  
0.375291462 1.159854 0.184373751 0.2976291 0.506355344 0.8993863  
0.945488 0.4096037 0.307247794 0.1340311 0.9614788 1.540529 0.371077471  
0.9099459 0.256664165 0.9256028 0.3733017 2.042561 0.07550182  
0.2730938 0.1358676 1.182247 1.148013311 0.3232051 0.135435 0.4020442  
0.1629363 0.484524 0.7203919 0.1960658 0.3068343 1.329881974  
0.09782707 0.07044479 0.524407318 0.5000799 0.115202315 0.7047655  
0.234823 0.4817056 0.338466 0.1696772 0.7681337 0.16570541 2.835354818  
0.2008051 0.1725672 0.7465118 0.593741751 0.3133397 0.1400382  
0.1493075 0.60401374 0.3881951 0.5121882 0.192756611 1.561804  
1.142571789 0.184143365 0.1859525 0.216960434 0.2022118 0.4696152  
0.323174039 1.103093 0.2794996 0.28333776 0.9273396 1.395143349  
0.83585814 0.1260907 1.247480657 0.5123376 2.176242 2.025946 0.324067  
0.9348079 0.603538243 0.789013 0.7694635 0.3145385 0.1245426  
0.273672 0.94996 0.9453002 2.50111 0.39506 0.869657 1.935607 1.74930502  
0.82602749 0.2366447 1.022092749 0.891383752 0.2096524 1.010855686  
0.7510869 0.07629136 0.195682174 1.309717102 0.202186272 0.714048988  
0.258456 0.6215169 0.8850727 0.6955383 1.685002 0.6108437 0.638304293  
0.528554 0.9742537 0.866638682 1.229604 0.4838637 0.385772586 1.523597  
0.4212689 0.501769082 0.6900348 0.9605161 0.191118245 0.8063386  
0.8233423 0.1588691 0.68871574 0.7594063 0.7253024 0.163441062  
0.214382 0.69537561 1.009074 0.1977555 0.381814411 0.4864414 1.800090413  
0.8443849 2.943912 0.1703544 0.8311366 0.2843624 0.440399276

0.4063198 0.2706392 2.216917 0.8065636 0.228209 0.02809165 1.047635  
1.991109 1.036398019 0.060689953 1.846567 0.2797649 1.088521 0.4005491  
0.822904676 0.7008161 1.362504988 0.5270727 0.6072389 0.229425233  
0.94447501 0.3328965 0.3982496 0.379679393 0.5843346 0.1559656  
0.2336021 0.7859073 0.8527158 0.4571816 0.5970432 0.2029258  
0.2200045 1.908203 2.133683 0.1993581 0.1933229 0.713677839 1.101662  
0.5068666 0.165838101 0.2828631 0.3162283 0.8871978 1.061432  
0.422483 1.129688337 1.572378 0.2486919 0.4276618 0.008875987 0.3980476  
0.160107567 0.2357843 0.7014359 0.2256494 1.342695168 0.244604518  
1.164401 0.2018764 0.9805235 0.493404297 0.9236203 0.8482561  
0.335949715 0.4206157 1.271712 0.06980765 0.4456356 0.2813421  
0.509687 0.973951509 0.5911334 0.084054978 0.4041339 2.684046 1.828182  
0.1753213 1.118701 0.2168718 0.778789 0.450470556 2.161922 1.841146  
0.086505511 0.9016134 0.07896036 0.5814261 0.5754127 0.5122056  
1.677165 0.321364 1.524558 1.221437132 0.2184985 0.418084946 1.185574  
0.9146954 0.605705 1.225653447 0.464277878 17.48316 0.6756867 1.009076  
0.3901039 0.4001568 0.205467049 0.2981891 17.16023 0.2004549  
1.239373321 0.2333436 0.06127542 0.382941574 0.08675096 0.238767439  
0.2477394 1.402891 1.111860967 0.827615 0.6614463 0 0.904147322  
0.1744297 0.1927775 0.6905808 1.02579 0.9020812 1.389911 1.137592  
0.5402019 0.4946097 0.817184709 0.07107381 0.296730056 0.2795306  
0.298261915 0.8500581 0.1391953 0.426634345 0.3053388 0.16247  
0.195053 0.357607009 0.1365321 0.2654211 0.134437689 0.676643527  
0.09686525 0.2986779 0.2209148 0.73429407 1.11148988 1.51578825  
0.150629 0.1932471 0.4856772 0.06701938 0.3298259 0.2213413  
0.3026695 0.2899022 0.938213 0.1413895 0.2152536 0.217290943  
0.4945948 0.3453678 0.7285007 0.3788914 21.63436 1.94865 0.2535586  
0.2581526 0.8185657 0.4065268 1.295961012 2.352542 0.18583 0.7493946  
0.3898897 1.334529292 0.2845684 2.780043 1.253549 0.1631167 1.685817  
0.1208592 0.1564308 0.797079117 0.2473015 0.2107729 0.149108671  
0.3517701 1.018742 1.124727 0.457693 0.708783 0.284589076 0.631498594  
0.7002783 1.107597 0.697348 0.045161832 0.722614471 0.657120481 0.392159  
0.3160978 0.6588697 0.5920342 1.169732 0.2492132 0.2080312  
1.61658878 0.811898276 0.1753994 0.72727454 17.74947 0.425712701  
0.8808457 0.9686287 0.2874021 2.938462 0.7794319 0.3091151  
1.111142 0.08335115 0.245584 0.930559343 2.623206 0.787833 0.3363393  
0.7452222 0.700204147 0.4874855 0.3261686 0.8330665 0.556918065  
0.7277369 0.2704415 0.1659007 0.2332954 0.6332353 0.1660229  
0.6977051 0.860626192 1.206259927 2.113229054 0.161302 0.328940668  
0.083854659 0.8430719 0.9104841 1.154932879 0.4828959 0.2253869  
0.1952021 1.197077762 0.2433287 0.1726126 0.1352597 0.268312715  
0.1532458 0.393975 0.1779389 0.5031608 0.2910577 0.6968677  
0.4783779 0.2182305 0.7950635 0.5372031 0.8458819 0.127760161  
0.4085935 0.6790739 0.4721612 0.5551997 0.1567966 0.2462255

|             |             |             |              |             |             |             |             |             |             |            |   |
|-------------|-------------|-------------|--------------|-------------|-------------|-------------|-------------|-------------|-------------|------------|---|
| 0.1208806   | 0.100547151 | 0.176932435 | 0.204866112  | 0.1384997   | 0.7956778   |             |             |             |             |            |   |
| 0.2354475   | 0.8625168   | 1.087301    | 0.938734511  | 0.2847552   | 1.526179    | 0.1099092   |             |             |             |            |   |
| 0.2144072   | 0.2795781   | 0.111591938 | 0.2163397    | 1.388428    | 0.8189282   |             |             |             |             |            |   |
| 0.6692623   | 0.4908165   | 1.644758    | 1.505951     | 0.593319024 | 0.2343907   | 0.7814303   |             |             |             |            |   |
| 0.263748579 | 0.107973    | 0.4861372   | 1.172713     | 1.221077    | 0.7569748   | 1.080186936 |             |             |             |            |   |
| 1.053598004 | 0.493141084 | 0.02470693  | 1.386571     | 0.271736    | 0.1363367   | 0.8585093   |             |             |             |            |   |
| 0.2013852   | 0.556557008 | 0.2391752   | 0.231658778  | 0.1736212   | 0.4394825   |             |             |             |             |            |   |
| 0.4514579   | 0.5235982   | 0.1385015   | 0.849020846  | 0.4062216   | 0.477725    |             |             |             |             |            |   |
| 1.119857    | 0.5912908   | 0.2668482   | 0.9920209    | 0.4256454   | 0.637244273 |             |             |             |             |            |   |
| 0.8487194   | 0.351731272 | 0.1222241   | 0.01380012   | 0.841434203 | 2.624756    |             |             |             |             |            |   |
| 0.4119921   | 0.3304177   | 0.724330598 | 0.1825745    | 1.179153    | 1.22535     | 0.284790477 |             |             |             |            |   |
| 0.3702573   | 0.3534651   | 0.04717077  | 0.117415     | 0.4135283   | 0.9777931   |             |             |             |             |            |   |
| 0.3059701   |             |             |              |             |             |             |             |             |             |            |   |
| AC010776.2  | 38.92897    | 0.03586232  | 0            | 0           | 0           | 0.025142862 | 0           | 0.015021086 | 0           | 0          |   |
| 0.014664738 | 0.0398498   | 0           | 0            | 0           | 0           | 0.2445996   | 0           | 0           | 0.03260008  | 0          |   |
| 0           | 0.060734908 | 0.7703389   | 0            | 0.022598391 | 0.0249831   | 0.02352565  |             |             |             |            |   |
| 0.06281979  | 0           | 11.80957    | 0            | 0.189185213 | 0           | 0           | 0           | 0.012747025 |             |            |   |
| 0.01513008  | 0.06087373  | 0           | 0            | 0           | 1.815722    | 0.044620979 | 0           | 0.02239267  | 0           |            |   |
| 0           | 0.01955812  | 0           | 0.01402157   | 0.034970876 | 0           | 0.034658008 | 0           | 0.01481284  |             |            |   |
| 0.01495098  | 0           | 0           | 0.01407368   | 0           | 0           | 0           | 0           | 0           | 0.03620087  |            |   |
| 0.0235253   | 0           | 0.02950197  | 0.05311055   | 0.027110895 | 0           | 0.011580621 | 0           |             |             |            |   |
| 0.0136185   | 15.15422    | 0.07785159  | 0            | 0           | 0           | 0.087699013 | 0.03784832  | 0           |             |            |   |
| 0.01378332  | 0           | 0.01403386  | 0            | 0.01250752  | 0           | 0           | 0           | 0           | 0           | 0          |   |
| 0.1682346   | 0.016089179 | 0.01866782  | 0.07262723   | 0           | 0.02859565  | 0           | 0           | 0           | 0           | 0          |   |
| 0           | 0           | 0           | 0.01488942   | 0           | 0           | 0.04810787  | 0           | 0.02926427  | 0           | 0          |   |
| 0.01067711  | 0           | 0.1099277   | 0            | 0           | 0.01383867  | 34.43293    | 0.01249713  | 0           | 0           | 0          |   |
| 0           | 0           | 0           | 0.020826702  | 0.015390282 | 0           | 0           | 0.03414682  | 0.5094492   | 0           |            |   |
| 0.063027896 | 0           | 0.086907561 | 43.63724     | 0           | 0           | 0           | 0.01597958  | 0           | 0           | 0          | 0 |
| 0.021540206 | 0           | 0           | 0            | 0           | 0           | 0.02069038  | 0.013099098 | 0           | 0           | 0          | 0 |
| 0           | 0           | 0           | 0.042654244  | 0           | 0.018723772 | 0.05016086  | 0.05709987  | 0           | 0           | 0          | 0 |
| 0           | 0.02517401  | 0           | 0.1097729    | 0           | 0.048589889 | 0           | 0           | 0           | 0           | 12.16824   | 0 |
| 0           | 0           | 0           | 28.368763603 | 0           | 0           | 0           | 0.011453793 | 0           | 0           | 0.01499535 |   |
| 0.02452589  | 0           | 0           | 0            | 0           | 0           | 0.02879692  | 0.55944     | 0.01205126  |             |            |   |
| 0.0114461   | 0           | 0.2622115   | 0.0223891    | 0           | 0           | 0           | 0           | 0           | 0           | 0          | 0 |
| 0.1079144   | 13.35121    | 0.01799694  | 0            | 0           | 0.047171502 | 0           | 0.01278386  | 0           |             |            |   |
| 8.993895    | 0.04391717  | 0           | 0            | 0           | 0.02721988  | 0           | 0           | 0           | 0.1141507   |            |   |
| 0.03101738  | 0           | 0           | 0.01210461   | 0.043837457 | 0.01683799  | 0           | 0           | 0.01309008  |             |            |   |
| 0           | 0.05764037  | 0           | 0.04803673   | 0           | 1.290449    | 0           | 0           | 0           | 0           | 0          | 0 |
| 2.207555752 | 0           | 0           | 0.04192665   | 0.2052951   | 0           | 0           | 0           | 0.01930485  | 0           |            |   |
| 0.01384835  | 0           | 0           | 0            | 0           | 0           | 0           | 49.69374    | 0.01934512  | 0           |            |   |
| 0.04304072  | 0           | 0           | 0            | 0           | 0.022425663 | 0.1082616   | 0           | 0           | 0.06037319  |            |   |
| 0           | 0           | 0           | 0.1657767    | 0           | 1.9262594   | 0.060146928 | 0           | 0           | 0           | 0          | 0 |
| 0.01333544  | 0           | 0           | 0.09503089   | 0           | 0           | 0           | 0.346396102 | 20.6532     | 0.076659909 |            |   |
| 0           | 0.03148311  | 0.053983735 | 0            | 0.1250975   | 0           | 0.037620168 | 0.01715598  | 0           |             |            |   |

|             |             |             |             |             |             |             |             |             |             |             |             |             |             |             |             |             |            |             |             |             |            |             |             |             |             |           |            |
|-------------|-------------|-------------|-------------|-------------|-------------|-------------|-------------|-------------|-------------|-------------|-------------|-------------|-------------|-------------|-------------|-------------|------------|-------------|-------------|-------------|------------|-------------|-------------|-------------|-------------|-----------|------------|
| 0.013821384 | 0.074053002 | 86.42343    | 0           | 0           | 0           | 0           | 0           | 0           | 0           | 0           | 0           | 0           |             |             |             |             |            |             |             |             |            |             |             |             |             |           |            |
| 0.03413377  | 0           | 0           | 0           | 0.02631673  | 0.287688286 | 0           | 0           | 0           | 0           | 0           | 0           | 0           |             |             |             |             |            |             |             |             |            |             |             |             |             |           |            |
| 0.2361037   | 0           | 0.05595098  | 0           | 0           | 0           | 0           | 0           | 0           | 0           | 0           | 0           | 0           |             |             |             |             |            |             |             |             |            |             |             |             |             |           |            |
| 0.05254502  | 0           | 0           | 0           | 0           | 0           | 0           | 0.03667116  | 0           | 0           | 0           | 0           | 0           |             |             |             |             |            |             |             |             |            |             |             |             |             |           |            |
| 0.01389541  | 0           | 0           | 0.014427476 | 0           | 0           | 5.292054    | 0.040858716 | 0           | 0           | 0           | 0           | 0           |             |             |             |             |            |             |             |             |            |             |             |             |             |           |            |
| 0.1503361   | 0           | 0           | 0           | 0.01910249  | 0           | 0.03189992  | 0.01677244  | 0.314802371 | 0           | 0           | 0           | 0           |             |             |             |             |            |             |             |             |            |             |             |             |             |           |            |
| 0.02034449  | 0           | 0.03974817  | 0           | 0.01653354  | 0.02019207  | 0.03939664  | 0           | 0           | 0           | 0           | 0           | 0           |             |             |             |             |            |             |             |             |            |             |             |             |             |           |            |
| 0.009452626 | 8.514153    | 0           | 0.04189404  | 0.01948985  | 0.276030705 | 0.05285661  | 0           | 0           | 0           | 0           | 0           | 0           |             |             |             |             |            |             |             |             |            |             |             |             |             |           |            |
| 0.0144901   | 0.4924048   | 0.063773879 | 0.06740738  | 0           | 0           | 0.013053205 | 0           | 0           | 0           | 0           | 0           | 0           |             |             |             |             |            |             |             |             |            |             |             |             |             |           |            |
| 0.05318984  | 0           | 0           | 0.01364046  | 0           | 0           | 0           | 0           | 0.01459328  | 0           | 0           | 0           | 0           |             |             |             |             |            |             |             |             |            |             |             |             |             |           |            |
| 0.015805168 | 0           | 0           | 0           | 0.03730089  | 0           | 0           | 0           | 0.2260293   | 0           | 0           | 0           | 0           |             |             |             |             |            |             |             |             |            |             |             |             |             |           |            |
| 0.01925613  | 0           | 0.1715408   | 0.03501681  | 0.01828646  | 0.02267873  | 0           | 0           | 0           | 0           | 0           | 0           | 0           |             |             |             |             |            |             |             |             |            |             |             |             |             |           |            |
| 0.0486019   | 0           | 0.1034168   | 0           | 96.626170   | 0.05892037  | 0           | 0.02488714  | 0           | 0           | 0           | 0           | 0           |             |             |             |             |            |             |             |             |            |             |             |             |             |           |            |
| 0.01280256  | 0.0248552   | 0           | 0.014041573 | 0.081292118 | 0.01491705  | 0.02068574  | 0           | 0           | 0           | 0           | 0           | 0           |             |             |             |             |            |             |             |             |            |             |             |             |             |           |            |
| 0.01298863  | 0           | 0           | 0.053980288 | 0           | 0           | 0           | 0.05620874  | 0.23045039  | 0           | 0           | 0           | 0           |             |             |             |             |            |             |             |             |            |             |             |             |             |           |            |
| 0.01590046  | 0.02238365  | 0.01513734  | 37.44731    | 0.01285011  | 0           | 0           | 0           | 0           | 0           | 0           | 0           | 0           |             |             |             |             |            |             |             |             |            |             |             |             |             |           |            |
| 0           | 0           | 0.01165906  | 0           | 0.02865475  | 0           | 0           | 0           | 6.162987    | 0           | 0           | 0           | 0           |             |             |             |             |            |             |             |             |            |             |             |             |             |           |            |
| 0.138698    | 0.03849228  | 0           | 0           | 0.167668666 | 0           | 0           | 21.71293    | 0           | 0.02364242  | 0           | 0           | 0           |             |             |             |             |            |             |             |             |            |             |             |             |             |           |            |
| 0           | 0           | 0           | 0           | 0.01588305  | 0.1495832   | 0           | 0           | 0           | 0.023227559 | 0           | 0           | 0           |             |             |             |             |            |             |             |             |            |             |             |             |             |           |            |
| 0.1040435   | 0.388398238 | 1.074665    | 0           | 0.0219805   | 0           | 0           | 0.1045883   | 0           | 0           | 0           | 0           | 0           |             |             |             |             |            |             |             |             |            |             |             |             |             |           |            |
| 0.015904631 | 0           | 0.5735296   | 6.338676    | 0.01475381  | 0.01748254  | 0           | 0           | 0           | 0           | 0           | 0           | 0           |             |             |             |             |            |             |             |             |            |             |             |             |             |           |            |
| AC105020.1  | 0.04301632  | 2.268011167 | 0.2814676   | 1.318001031 | 1.060792039 | 0.76422899  | 0.842425    | 1.767378887 | 0.3185492   | 0.6000099   | 0.345090224 | 1.51081     |             |             |             |             |            |             |             |             |            |             |             |             |             |           |            |
| 0.61054     | 3.018734    | 0.3498088   | 1.081482    | 0.3757331   | 0.992357008 | 1.392302    | 0.9669214   | 0.422903194 | 3.517061    | 1.994942017 | 1.25669     | 1.244696    | 1.085727163 |             |             |             |            |             |             |             |            |             |             |             |             |           |            |
| 0.9308444   | 0.8304073   | 0.09239209  | 0.5080054   | 0.2084269   | 0.376820593 | 4.154344    | 2.08682873  | 0.8575202   | 1.549077549 | 1.42234262  | 2.324710455 | 1.654105    | 1.89505     | 1.025367757 | 2.821985    | 0.237895729 | 0.2361641  | 1.443777046 |             |             |            |             |             |             |             |           |            |
| 2.183232    | 1.943105    | 0.5418365   | 1.696768461 | 0.2109438   | 2.057443    | 2.825241    | 2.305928836 | 1.370907    | 0.790084693 | 2.647404    | 0.2759554   | 4.024011    | 0.3237162   | 0.4109677   | 0.4129088   | 1.290228    | 2.30510266 | 0.5864463   | 0.5787277   |             |            |             |             |             |             |           |            |
| 1.125768    | 0.314717    | 1.6448      | 4.269829    | 1.552902    | 0.7496621   | 2.858360151 | 0.2675715   | 0.06943311  | 0.485125184 | 0.6663444   | 0.051096537 | 2.03465     | 0.5407933   | 0.2185102   | 0.4580004   | 0.4333046   | 1.465133   | 0.335527725 | 2.095976577 |             |            |             |             |             |             |           |            |
| 1.076197    | 0.4768067   | 0.2500188   | 0.354505148 | 0.7224098   | 0.08074585  | 0.1655587   | 3.25640342  | 0.9406079   | 2.64361     | 0.608606829 | 0.1960524   | 1.831197776 | 0.415797312 | 0.2657589   | 1.191044312 | 0.7046954   | 6.097435   | 0.492730487 | 1.338815    | 0.8074267   | 0.70338189 | 1.410205    | 3.578592431 | 0.654618361 |             |           |            |
| 0.1500453   | 1.058431796 | 0.4640835   | 2.315688    | 1.002356    | 0.1273609   | 0.9325415   | 1.016423722 | 0.8583846   | 4.114274    | 2.054939    | 0.4041901   | 0.8408354   | 1.050339    | 2.917293    | 0.1969236   | 0.4595032   | 1.31526    | 2.054564    | 2.973006663 | 2.415475245 | 1.252532   | 2.440256618 | 1.531650671 | 0.288134    | 1.639349885 | 0.9290955 | 0.04028342 |
| 0.974367122 | 2.595548786 | 0.067257882 | 1.434414872 | 0.2179678   | 0.7297041   | 0.8319213   | 1.521782    | 2.209182    | 0.693082    | 0.919508528 | 1.151723    | 3.91787     | 7.328691112 |             |             |             |            |             |             |             |            |             |             |             |             |           |            |

1.066147 0.9142894 0.235774022 2.000388 0.9696306 0.870133444 0.4863685  
0.3651641 0.096327378 2.060629 3.434235 0.3711963 1.412083844 0.7335302  
0.8882727 0.411253974 0.3063896 2.662002356 1.860744 0.158628 0.942602797  
1.072074 4.399387982 1.328226 10.49031 1.147371 1.533758 0.9679389 1.881872066  
0.1936227 0.2227521 2.250703 1.474208 0.183056 0.124597 0.7115721  
1.405331 2.181662034 0.026918265 3.204868 0.8540997 3.928485 0.1683081  
1.212886565 0.7612363 2.248513164 1.183585 1.10619 0.302396061 2.76837813  
0.2542896 0.1471988 1.187234217 0.6876052 0.2258828 0.2742651  
5.092803 1.492644 1.298357 1.574726 0.3073348 0.5207933 2.488782 6.165733  
0.0927013 0.6504864 1.534334211 1.719014 1.339802 0.210158293 0.3778927  
0.2188439 1.905766 1.007516 0.2748343 4.208895977 2.532354 0.3258986  
0.7159641 0 0.1722429 0.208409762 0.389795 1.026011 0.5471257  
2.265010776 0.135614069 4.405377 0.341992 3.489835 0.702258243 1.605199  
0.996959 0.530118453 1.675727 1.285073 0.1990434 2.939171 0.3743573  
1.704909 2.126943799 1.255999 0.362459299 0.9010352 4.414757 1.782686  
0.3987771 1.290083 0.2740318 0.9343383 0.108865682 2.299053 7.826926  
0.123327098 2.704017 0.2146502 1.470255 1.216626 0.4270345 0.03785677  
0.4327014 2.518772 1.833768976 0.3174711 0.221717335 0.8568483 2.23858  
1.864288 2.575452271 1.47358895 0.8018579 1.100136 1.468565 0.5908193  
0.4930126 0.208019435 0.52466 2.779372 0.1649123 0.98947519 0.5904613  
0.639481 0.177180524 0.1553891 0.569474593 0.2747042 1.708955 2.12715185  
0.399587 0.9604577 0.31478253 0.914096922 0.8979994 0.2591031  
1.338197 0.8638792 1.739026 8.673204 1.238569 0.6056549 1.390024 1.615275187  
0.09954913 0.389171962 0.1377581 0.330725797 2.002497 0.1620631  
0.502844418 1.595055 0.6516202 0.05642173 0.774617175 0.891535 0.3622282  
0.121966661 1.028625858 0.1074084 0.4010706 1.158409 0.797768401  
2.555559415 3.73401426 0.1550937 0.267851 0.02341478 0.246005 0.2438168  
0.9203733 0.4698584 0.2672782 0.7645809 0.2898928 0.9095742  
0.117532516 1.109112 0.1914794 1.890912 0.5479974 7.176481 0.6173567  
0.6948918 0.5656861 0.8159464 0.8031984 1.72909482 2.025377  
0.2004873 1.416191 0.8743685 1.105585882 0.5867971 3.803918 0.6683778  
1.214907 4.497797 0.268028 0.1629448 1.653873426 0.2627929 0.5812891  
0.122472731 0.5357423 2.078511 2.485922 2.793008 2.519597 0.307035981  
1.421685456 1.706833 2.918667 0.2908343 0.330510879 0.727636503 1.072147304  
0.2726981 0.6425888 1.727525 0.77472 1.704427 0.4375358 0.3440562  
1.414300787 4.488479806 1.017335 1.379794032 3.605005 0.668735768 0.7538171  
3.454803 0.3025888 1.248824 2.30317 0.4113124 4.18069 0.1437697  
0.05732932 1.251746046 4.366327 0.3356626 0.6819614 1.364845 6.857480309  
0.3399061 0.128814 1.391938 0.531144091 0.520818 0.4628541 0.7883913  
0.3941914 1.518001 0.4810974 1.371932 3.862001972 4.526543534 0.983324088  
0.3362544 0.737592883 0.046490848 2.447918 0.3065754 7.95567309  
1.184356 0.6339403 0.2689209 3.175108961 1.522025 0.03022111 0.1799783  
0.264459395 0.06608216 0.3776219 0.2911078 0.317589 1.084756 0.3001923  
0.414313 0.7050383 1.3502 0.1426764 2.298402 0.321620174 0.1320193



0.5570038 1.126541 1.948814 0.2928217 0.376587 0.2802607 0.128214718  
0.192748451 0.454328929 0.292523 1.135812 0.4138985 2.186048 1.230031  
4.745842511 0.3854598 2.968649 0.1503954 0.1799144 0.6131277  
0.231336259 0.2826065 1.675966 0.6200069 1.024108 0.1594585 6.413153  
0.4465916 1.726398915 0.3049523 1.56746 0.638785272 0.1681246  
2.399301 1.108874 13.67207 0.4706072 1.122152297 2.089251517 0.441871761  
0.02348239 2.303378 0.4680586 0.3809638 0.9264538 0.1320957  
2.885410972 1.044758 0.760345082 0.4962705 0.5092686 0.1133425  
1.994695 0.1854509 1.319849734 0.6722928 0.4708642 0.9293572  
1.079892 0.2647462 1.82285 3.51949 0.610107586 2.397471 0.421330017  
0.1694093 0.06120871 0.894936475 3.755959 1.123227 0.4633648 0.681656604  
0.3462129 3.606297 1.062343 0.42884801 0.2269749 0.5623451 0.03076765  
0.455682 1.028497 0.8071792 0.2083255  
AC019197.1 3.055468 0.432035967 0.03803317 0.13215213 0.359135029 0.040687776  
0.1487649 0.070223325 0.0106212 0.06287529 0.031641881 0.08120644  
0.9899869 0.247916 0.4660626 0.06250265 0.2052434 0.052748301  
0.1152235 0.005861725 0.110790507 0.1057328 0.054602824 0.06209175  
0.0217387 0.219420909 0.2021462 0.01692031 0.1976702 0.03054415  
6.160821 0.114736357 0.04802411 0.061230304 0.1119441 0.183274097  
0.097173372 0.032088069 0.1088198 0.2243833 0.092796619 0.2872275  
0.065439132 6.747247 0.080231668 0.421787 0.1207908 0.2805564 0.073502099  
0.04220025 0.1692136 2.16317 0.144624235 0.1930763 0.149562101  
0.1125773 0.1491533 0.2096868 0.02047039 0.3569901 0.01637201  
0.2530547 0.067298257 0.1297361 0.1289668 0.3831656 0.01282529  
0.03082338 0.5097481 0.188766 0.1438205 0.677908727 0.04774196  
0.04456504 0.077995682 0.04785313 0.183240408 0.1084503 0.8472509  
4.336585 0.1866435 0.05855006 0.1028443 0.287140743 0.14980456  
0.3198536 0.01380606 0.5948011 0.122060156 0.1261694 0.02278067  
0.04048092 0.095998926 0.1286379 0.1239882 0.053146804 0.04108884  
0.124952919 0.141607618 0.0873882 0.040501269 0.05370569 0.01305889  
0.09857292 0.0565587 0.02393027 0.027517535 0.06896212 0.11621162  
0.156891843 0.1000574 0.091025572 0.05282388 0.04397756 0.129752  
0.1000965 0.06314307 0.088583795 0.04843488 0.06911348 0.04609679  
0.4249644 0.06492426 0.04870712 0.03483607 5.529222 0.1078594  
0.1808975 0.05382466 0.150705574 0.325033809 0.1077891 0.067406181  
0.365281133 0.1441062 0.528817774 2.769068 0.8687469 0.060061376  
0.060441921 0.160341584 0.052088641 8.48583 0.1081337 0.03337259  
0.8808717 0.07470426 0.1733177 0.124248119 0.1149764 0.1954665  
0.038730809 0.030079 0.377498 0.02964823 0.2727768 0.1297912 0.030686132  
0.08701641 0.2455383 0.193135431 0.1588397 0.2498305 0.1384499  
0.063416939 0.04941446 0.08218092 0.255651131 0.0503743 0.154866645  
0.07816707 0.09582496 0.046876623 0.0835552 0.451527832 0.07187443  
0.1810586 0.1180341 0.04441036 0.2689451 0.128139802 0.1092528  
0.02269389 0.4917767 0.1586024 7.156208 2.321458 0.2767025 0.1295612

0.181976296 0.691090188 0.07463099 0.07683616 0.9224047 0.1440361  
0.304801971 0.03877721 0.0998401 0.140206 0.1322978 0.098585542  
0.196519019 0.07220509 0.1319697 0.055587791 0.05173139 0.1035578  
0.05029562 0.286031 0.08643977 0.3049781 0.1885899 0.05636006  
0.02412752 0.1208588 0.03506022 0.04707655 0.8621291 0.050697508  
0.1478041 0.1249308 0.012846502 0.2106695 0.587391 0.1229671  
0.1209349 0.05956364 0.039581587 0.1305637 0.0643616 0.06820562  
4.324475 0.102656 0.028310264 0.02789536 0.1537596 0.03915461 0.201859626  
0.016579564 0.243146 0.3192794 0.09481145 0.083858299 0.1042548  
0.08705979 1.029951777 0.07266213 0.2150997 0.02703794 1.930025  
0.1346095 0.09673201 0.229794443 0.1900216 0.045578714 0.08789082  
0.33906 0.2615317 0.05850323 0.2183811 0.08204544 0.1592269  
0.004697445 0.09602453 0.2488493 0.030154829 0.0344526 0.0953005  
0.04613819 0.08723052 0.02505951 0.3609994 0.09957671 0.1344616  
0.102421061 0.1470793 0.078854287 0.1635891 0.1444638 0.9315833  
0.15972651 0.124722234 5.276403 0.1947898 0.1709907 3.977859 0.103326  
0.043596887 0.1563475 1.032449 0.01051901 0.298389641 0.2579271  
0.05863505 0.017926586 0.1031275 0.073285679 0.03663719 0.1500004  
0.152849235 0.04471173 0.2220329 0.30787113 0.677730092 0.1216084  
0.0285091 0.1636019 0.1478596 0.1342771 0.04678 0.1228751  
0.0683489 0.1248524 0.115595858 0.09736342 0.062284462 3.069397  
0.14335352 3.000911 0.1924701 0.135893189 0.005518987 0.1349604  
0.02759146 0.108229945 0.03084766 0.005535549 0.05467401 0.044384173  
0.8404011 0.05794819 0.04366206 0.271479617 0.084201307 0.280049676  
0.0612588 0.07204175 0.1889307 0.03007546 0.06783878 0.1923081  
0.04923666 0.04768963 0.3677674 0.04339713 0.04731934 0.36209868  
0.1483305 0.475391 0.6973336 0.06967551 2.547186 0.09703959 0.1509057  
0.1099866 0.1067135 0.1262512 0.097125748 0.1711255 0.1552343  
0.0569218 0.05701138 0.361823477 0.01624283 0.088181 0.04338736  
0.04505936 0.5411243 0.09284236 0.1272367 0.100170052 0.03352473  
0.1098955 0.04941078 0.103417 0.01325788 0.2578694 0.03497889  
0.1102142 0.116781261 0.098578154 0.04836121 0.07065804 1.757487  
0.014693371 0.171561002 0.030541956 0.0162189 0.05356364 0.1618886  
0.4187346 0.14426 0.01689194 0.1606032 0.042221241 0.103773425  
0.04389699 0.253031091 4.874254 0.230842216 0.03567417 0.1524884  
0.1275083 0.5079931 0.1495691 0.4320802 0.1734797 0.143124  
0.2102647 0.124080669 0.2756157 0.05050658 0.05731929 0.06129544  
0.030578648 0.07272194 1.533634 0.06683119 0.079799983 0.2169594  
0.08129322 0.1387946 0.3915605 0.2060227 0.03240925 0.06809936  
0.223477475 0.197831955 0.11510116 0.0314877 0.107020616 0.011367523  
0.2262209 0.3644658 0.101915117 0.06657197 0.04024178 0.2068849  
0.0517566 0.08119675 0.3251333 0.04950749 0.027712811 0.5470574  
0.03258801 0.08541486 0.2455545 0.05260857 3.857595 0.08748989  
0.2016082 0.1922572 0.3139736 0.1157027 0.106725257 3.99247

0.3404839 1.313693 0.08373754 0.07607301 0.09207965 0.3932843  
0.061336773 0.035346834 0.128628686 0.06437257 0.2008499 0.03736716  
0.1718077 0.2345102 0.232944878 0.5594791 0.06580665 0.05706207  
0.0377066 0.01516009 0.110497614 0.3085413 0.1486687 0.1086679  
0.0217744 0.6662093 0.1201481 0.1994024 0.191666881 0.06100707  
0.09998116 0.112908442 0.03363408 0.1318037 0.7337332 0.1644775  
0.1185035 0.105081149 0.156381102 0.056722311 4.89193 0.356368 0.03862534  
0.02661424 0.4551345 0.341445 0.221847386 0.08842668 0.052759015  
0.06904031 0.1739011 2.688209 0.03373313 0.01275322 0.101554536  
0.2564374 0.05180916 0.1947755 0.08744366 0.04569414 0.2920149  
0.2338628 0.118733512 0.3569745 0.091882537 0.01988277 0.1122465  
0.167608182 0.455031 0.04918949 0.126472 0.091307556 0.1076096 0.3886514  
0.4178659 0.057195298 0.08814363 0.1312496 0.4694369 0.03183408  
0.07544363 0.075266 0.6156205  
ARMCX5-GPRASP2 0.7813864 2.187892529 1.042245 1.766100886 0.713467903  
1.308342371 2.607525 1.179950322 2.261175 1.952079 1.11687318 1.371832 1.77725  
1.611874 1.016136 1.114194 1.287437 0.853927081 1.614443 1.631393 1.492582302  
1.342377 0.799187147 1.456407 0.8998907 1.099343808 1.394667 0.6285105  
0.7827853 0.8873375 0.6592626 1.2895634 1.016589 0.905241824  
1.625452 1.445100366 1.406386903 1.250374512 1.574627 1.110496 1.175162017  
1.471609 1.372592435 1.206686 1.399671184 1.227671 0.8214664 1.360999  
1.640872685 1.169808 1.409736 0.659743 0.913364215 1.123952 1.188497364  
1.232671 0.9037032 1.484449 1.339176 0.7213018 1.443207 1.251436 0.652937077  
1.46882 1.95434 1.567587 1.061826 1.342686 1.526668 2.266287 1.876123 1.49513696  
1.364599 1.05888 1.39453604 1.542539 1.246785657 1.597626 1.297846 0.3258309  
1.955709 1.437542 1.083337 2.352159503 1.44249672 1.086614 0.6684657  
1.264089 1.123929085 1.768319 0.8941887 1.336602 1.390048283 1.184309  
1.259317 0.265185104 2.414678 0.727386385 1.093078373 1.177676 1.109880322  
1.287763 1.390071 0.752950212 1.225758 1.320079 1.273871045 1.701375 1.447749615  
0.780202971 1.270323 1.341783327 1.067311 0.5363932 1.2277 1.087688  
1.359439 1.244159565 1.315781 1.715753 1.691836 1.249247 2.051688 1.040867  
1.120177 1.663971 0.9517869 1.491508 1.730768 0.678248657 1.362497888  
0.9447633 1.087897479 1.460561071 1.262319 1.992022885 1.66114 1.127104  
0.819143232 0.686944395 1.016590116 1.039620875 1.300088 2.260123 1.617606  
0.6651831 0.9939993 1.620696 1.564654198 1.917858 0.9958159 1.563210312  
1.083942 1.500639 0.991711977 1.147259 1.560034 0.782581251 1.56306 1.60879  
1.326695545 1.812373 0.8541329 1.509568 0.802793886 1.308909 0.6378646  
1.014822771 2.113928 1.224428309 0.9534018 0.9031441 1.266952708  
1.602254 1.487258434 0.7969551 1.214602 1.371374 1.707088 0.8588466  
1.136667634 1.284097 0.8203249 1.674819 1.470837 1.760396 0.6739198  
1.499196 1.761391 1.726984147 1.532583626 1.055088 1.540103 0.8286734  
1.521043 1.361011437 0.5073622 1.239888096 1.464937 0.5672165 1.772435785  
1.967733915 0.7672623 0.452293 1.130004863 0.6883271 2.175962 5.00678  
1.061991 0.9447657 1.554371 0.7214346 2.392586 0.4860124 1.050922 1.81159

0.8641872 1.701457 2.450939322 1.393044 1.154377 0.876031006 0.7007812  
1.367343 1.45677 1.750678 1.280259 0.802536134 0.9344315 1.136745 1.45961  
0.2561627 4.141538 0.809884485 1.322293 0.5563395 1.302458 1.561037085  
1.691299035 1.326279 1.416088 1.477982 1.52094305 0.8703956 1.008773  
0.897306884 1.05411 1.248649 1.229184 1.607641 1.856759 1.057257 1.367872292  
1.39189 1.465613734 1.812658 1.089503 1.425096 1.289278 0.9786673 1.660263  
1.05932 1.04172035 1.244409 1.133276 0.863767346 1.298854 1.254265 1.432445  
1.063948 0.65298 2.917439 1.428458 0.739944 1.226513932 1.793922 1.508251854  
1.680246 1.527086 1.224978 1.545108505 0.921960002 3.778886 0.9179406  
1.516777 0.3775708 1.340463 1.522739092 1.466897 3.941577 0.8281188  
1.135651809 1.559475 1.417337 1.803863557 1.703204 2.096516473 0.83279  
1.425624 1.0945691 1.250444 1.34933 0 1.303094701 1.269756 1.71755 1.36658  
1.514577 1.228331 1.037408 1.589536 1.423701 1.445912 0.980535152 1.268508  
1.254626408 0.5182125 1.112668669 1.539665 1.261653 1.006330706 1.009724  
0.9041129 0.9254641 0.802547396 1.737582 1.534476 0.925884867 2.027611793  
0.7687764 1.112086 1.322053 0.976645668 1.05157067 1.158782977 1.067389  
1.597621 2.532917 1.008782 1.381326 2.100584 0.9622262 0.893068 1.529199  
1.227046 1.631768 1.147145103 1.036667 0.9883522 1.740789 1.384689 4.424832  
1.703652 1.178723 1.607587 1.13181 0.8999318 1.552068897 1.500724 0.7790977  
1.604193 1.473703 0.816225607 0.7474278 0.7123717 1.500988 0.649513  
1.328171 1.120285 1.346692 2.227573555 1.017604 1.437876 1.419493281 1.25373  
1.911072 1.749618 1.728709 1.485288 1.581614707 1.081544489 1.352508 1.277052  
1.329191 0.839050538 1.134331896 0.584178272 1.114994 1.265054 1.764097  
1.074522 1.607195 1.804329 0.9730769 1.116886094 0.753156834 1.314189  
1.14500813 3.994053 0.917195476 1.931656 1.336549 1.539506 1.579005 1.643369  
1.490984 1.042451 0.8853689 0.9014934 1.20384795 1.485883 2.499112  
1.357799 1.434824 1.568156781 1.916047 0.7817545 1.432668 0.759917059  
0.9465828 2.20576 0.9062865 1.583045 1.675236 2.140182 1.409514 0.940164844  
0.960437685 1.386869206 1.431477 1.166883955 0.951639028 1.575572 3.456562  
0.815602068 1.096169 1.090729 1.088303 1.441887134 1.266079 0.7374128  
1.573648 0.883441681 0.4990897 0.9876655 1.16282 0.7888987 1.932288  
0.6782287 1.490893 1.618281 1.175708 1.241696 1.214201 1.008992837 0.956643  
2.198087 1.233448 1.638131 1.11641 1.470231 0.906848 1.645870822 0.873446964  
1.1085894 1.588146 1.773396 1.626257 1.047767 1.762906 1.126444439 1.64095  
1.339948 1.21481 1.609673 1.311161 1.255845536 0.9461632 0.5833021  
1.316495 0.9295365 1.048846 1.065777 1.326603 1.358631042 1.133064 1.211549  
2.109530355 1.089814 1.538831 1.496978 1.538499 1.096893 1.909562083 1.477349745  
0.86255454 1.400628 1.320254 1.32768 1.259106 1.099192 0.67534 1.176753005  
1.052392 0.409500256 2.164362 1.249787 1.229167 1.36524 1.98445 1.366277499  
1.213921 1.525532 1.854802 1.591267 0.4053311 1.252559 1.535527 1.336790505  
1.426113 1.250355536 2.171563 0.9956858 1.140891767 1.555107 1.608992  
1.402341 1.721135643 1.326829 1.40404 1.302351 0.81176394 1.227118 1.524617  
0.7157138 1.106008 1.219941 1.190641 0.450232  
AC073335.2 0.9096432 2.146220701 0.5363487 2.059797702 6.379265118

1.607385896 2.189301 2.000820824 0.2876335 1.785121 2.197524465 2.887699  
0.5847938 4.961542 2.973527 4.510905 1.977392 1.723393212 2.141256 1.356987  
0.808152517 1.505572 9.931163452 2.924913 3.741141 3.045620878 1.475521  
0.842534 1.267975 2.929778 2.092446 1.480696472 3.810101 4.3623878 1.140913  
3.810503356 3.592146383 4.132658769 1.136005 6.004828 1.407981009 3.582059  
0.519262652 2.921919 2.518532902 1.623553 9.328039 5.01412 0.607856594  
0.5959912 2.237308 13.16189 2.889370841 2.951693 2.30823742 3.343751 1.531  
5.960358 0.3826874 1.718699 0.8080808 3.417654 11.500917218 0.6800118  
1.013969 3.485778 0.8552357 2.584971 4.434711 0.7903961 1.160315 3.592091721  
0.3846273 0.9955282 2.38475028 1.14363 1.855423506 5.61224 0.7615357  
2.434824 2.233767 0.6283941 2.609942 1.346352532 7.700475412 2.675286  
2.564917 2.896816 2.614745906 0.5290534 0.7243895 0.734774 3.689974406  
2.00574 1.940987 4.206391139 0.01794726 9.919622224 0.689899093 0.6165993  
1.930804295 0.8738178 1.93366 2.602485507 4.217709 0.9982176 1.183913754  
2.624386 3.403923503 2.230308889 0.3802268 5.430640032 1.404891 9.066662  
7.239235 1.282492 1.820304 2.089403654 5.542859 2.94838 0.982573 0.971272  
1.296383 3.899102 5.52562 0.007010502 1.71174 2.269135 11.30839 6.59818201  
4.536180054 1.30931 10.965679131 1.890446391 0.8266696 2.284518553  
2.853468 0.3510663 1.238259259 8.903577152 1.224729684 3.444635005  
3.476336 2.536354 6.713689 8.285551 5.05015 3.411713 2.527456504 1.40618  
3.009003 1.833834586 3.31084 1.013886 0.941040515 1.795416 0.9614917  
1.469017624 4.560965 2.008482 1.633702245 4.811828 7.196114 1.906939 2.276015699  
2.215939 5.163887 2.02785954 0.5280738 2.846949217 4.076116 1.542676  
1.346252077 1.369681 5.731085144 4.360299 13.33371 1.044575 1.159574 1.038461  
5.266305156 0.5535601 1.33224 5.160409 3.344152 1.083325 0.3872337  
2.367784 6.722056 2.702514578 0.160993285 13.87053 2.705565 1.846864 1.545881  
2.137355684 1.395655 4.636542927 1.47449 10.18585 0.550569986 1.893635277  
0.9882087 1.928429 2.034148073 3.191662 0.8775235 1.654976 1.6961  
2.632144 4.753562 2.524778 0.3657472 1.45434 3.111838 5.51917 0.4615171  
0.2842044 2.174565068 4.055149 2.648403 1.150305171 2.213291 0.7904191  
2.962587 2.165757 0.8565563 4.465477457 12.40643 1.839368 4.867955 0.01892048  
2.897308 2.33464156 0.4934706 5.387013 1.620453 2.247219787 0.883501424  
5.111502 0.4064222 5.890369 1.888989384 4.189463 2.414714 1.542426226  
2.697748 3.443129 0.3590224 5.880569 0.747889 1.88322 3.206630514 1.514118  
0.789699902 1.031923 8.372104 3.348714 0.6005124 3.871125 0.8385803  
3.048059 1.760448357 4.618941 6.079171 0.447826821 2.70015 0.1737452  
2.005201 0.6653119 2.347871 0.006064674 1.332012 7.700381 2.278587334  
0.5835406 0.830934785 2.858174 2.044459 1.398093 2.097827606 4.406634786  
1.163679 4.649154 2.315306 0.2028205 1.372011 1.123522578 0.6478916  
0.8676799 0.8500038 3.304145501 0.684465 0.3636804 2.165045541  
0.2038889 2.484020317 0.9401657 2.489719 3.499507883 4.543912 1.622585  
4.16874155 2.355617768 0.8587333 0.9879013 2.805994 1.968269 2.178471  
6.270696 3.724431 6.047614 1.096749 2.196371698 0.4252753 0.997528831  
1.561376 0.972950366 1.568917 0.7368429 3.548701097 2.79153 0.5010715

1.307612 1.973686742 1.584542 0.8414227 0.451570839 2.729638259 1.697746  
1.304505 1.226426 5.054144151 4.444382453 8.383625018 1.215547 1.876591  
0.1275361 0.3941013 0.9104924 1.140236 1.951684 0.9396839 2.746905  
1.914506 1.0169 0.587457641 1.778766 2.892898 2.197039 1.114341 5.81019  
0.2260591 0.9901801 0.8035986 4.580093 4.175301 4.866249502 4.04309  
1.948502 2.187941 0.8217692 5.49330339 2.277409 9.370569 2.982924 0.8266252  
3.497189 0.6440733 0.4715532 1.759860595 1.116553 0.5414564 0.996705931  
2.981331 1.714116 4.4625 1.31395 1.881188 0.925450406 4.931287006 3.027741  
6.77748 0.7987166 1.193737082 2.514532857 4.062173297 2.314198 0.9358461  
2.735806 4.143986 2.526463 1.711756 1.337864 6.117436601 10.062674711 1.316604  
3.19617279 6.318422 1.898964022 4.155248 9.477033 1.175774 5.012467 2.515225  
0.569441 4.184707 1.013407 1.200067 2.986276611 6.99903 0.3033367 1.761665  
2.605938 10.765337116 1.588217 2.546173 2.513696 1.8781214 1.57394 1.804652  
1.340471 0.5051973 3.308166 0.981489 1.883865 10.576665466 10.084437178  
3.787400162 0.5959878 1.002435771 0.605759136 2.464109 0.3590369  
3.642543095 2.465821 0.6913727 1.420631 4.01836752 0.8822183 0.7552642  
0.3748239 1.028901527 1.899502 1.821974 0.5720636 2.937169 1.407463  
4.061015 0.9292243 0.8691214 7.171071 3.606809 2.613535 0.731146124  
1.195912 3.932831 1.397505 0.9457471 1.270484 0.8365681 0.4841165  
0.353646334 0.666091257 0.612915638 0.5154856 2.365449 0.5345345 2.55984  
1.906278 4.250820911 0.6306472 5.91077 0.9936461 0.4858629 5.690334  
0.399905303 1.562469 8.541747 1.427473 2.420518 2.363498 11.61012 4.715696  
2.045123096 1.025924 1.478573 1.22307307 0.4015563 2.404425 2.358795  
3.514751 2.205483 2.845711117 2.437156521 2.364322113 0.3159989 4.512268  
1.51841 0.6316183 2.178618 1.265677 3.263209385 1.895152 3.687151391  
0.3838066 1.761113 1.119715 3.62465 1.188373 2.791607597 1.964478 0.6688366  
3.302962 2.260225 2.764296 4.605214 4.013867 2.078461544 3.746749 1.08725363  
2.787765 0.1699649 1.49673473 9.404047 1.418047 2.47898 3.369111213  
0.7144449 8.082752 1.889332 1.209149489 2.019132 0.9663984 0.6111951  
0.9455303 2.647236 3.195504 1.876564  
AL162274.2 0.3333117 1.693144369 1.082276 2.519019047 1.761330156 1.432650901  
1.398755 1.124907383 1.442499 0.7400724 0.190994966 1.34077 0.8963556  
2.19367 2.133623 2.742499 0.4247585 0.764151284 1.090679 0.6899532  
1.655150112 1.627457 1.977543224 1.686577 1.443397 1.0301327 1.382875  
0.4596004 0.971578 1.60401 1.076663 0.755525718 1.620695 2.710363097  
1.737542 3.245055573 2.732099917 2.573286422 1.428653 3.419059 1.061306167  
2.510944 0.740625118 0.6837048 0.920150896 2.804542 1.676954 2.011006  
1.419741754 1.146271 1.573504 5.524202 5.522501782 2.767911 0.620660197  
2.930485 0.7716952 2.628761 0.2965493 2.513985 0.3705893 2.016266  
2.589665324 1.112835 0.4865391 1.555187 0.4644919 0.7973758 2.426638  
0.6482899 2.374567 2.582627391 0.2881773 0.2305723 1.368242777  
0.9593894 1.055789889 1.963866 0.7981589 1.935 2.196884 0.2271964  
1.443321 0.689752025 1.427750495 0.3697052 0.7083504 0.8526975  
1.729814278 1.005281 0.4950267 0.7737708 1.636131942 1.694131 1.706376

1.587968872 0.4340318 2.68695821 0.789012972 1.095552 0.576254284  
0.911743 1.359737 2.776668515 2.51392 1.083349 0.747449189 1.67807 2.785249074  
0.94702185 0.6794561 1.502889602 1.966257 3.38455 3.837689 2.054269  
1.238707 0.735218817 2.119609 2.085895 0.7095296 0.9843003 0.6718152  
2.124842 1.622126 0.2906402 2.522839 2.309839 3.898721 2.407978141 1.615020695  
0.6971041 2.373428498 1.403111645 2.261599 1.63973658 1.778926 0.374563  
0.380666106 3.283525572 0.223348842 1.509189929 0.9114817 1.17488  
3.928115 1.306349 3.746152 1.516947 2.049051433 1.991519 1.913293 0.841625147  
2.178734 1.236279 0.80532452 5.152472 1.363183 0.833516673 1.339371 1.953683  
0.767717593 2.087665 2.26202 1.169985 2.009667519 1.640501 2.072805 0.694416234  
0.982369 1.158335986 2.340991 0.86762 1.697724457 1.201543 2.464962755  
2.024607 3.934424 0.6040512 0.2680673 0.5844209 1.423888636 0.5440591  
0.5342359 4.50566 2.480399 1.072746 0.6206393 1.537358 2.550163 3.004543425  
0.417152029 2.871832 1.658956 3.352853 1.490439 2.75974315 1.193731 1.880265756  
2.294785 1.197853 0.701340262 1.779325819 0.6537605 1.031944 1.733602386  
1.697904 0.8907528 1.568557 1.412611 1.453483 2.083115 2.006352 0.5831956  
0.3276837 2.476532 2.920474 0.2841609 0.9818747 2.06561804 3.763829  
1.206561 0.581575095 1.606272 1.156166 1.523561 1.09497 1.203058 2.303873203  
2.364304 1.207112 2.408439 0.1307337 1.000967 0.410123627 1.136568 2.124896  
0.8419715 2.249453333 0.300229943 4.296469 0.9911401 2.12086 2.060879033  
1.443682 2.088884 1.522515388 2.46712 2.233966 0.3916918 2.429432 1.07253  
1.376308 2.29962017 1.511951 0.756579199 0.6684574 4.19765 1.353123  
1.191827 1.565339 0.6685715 2.193853 0.723038641 2.771298 1.85079 0.72807564  
1.247765 0.7128068 1.044363 2.096018 0.7374062 0.4399994 0.9015891  
2.209437 3.214787334 0.9987658 0.758586555 2.260735 2.049211 1.351724  
2.094494317 1.944840375 1.722986 1.070799 2.064249 1.6817 1.029089 0.394735674  
0.8348435 4.733175 0.5714483 1.679425511 0.616879 0.7432522 1.17675619  
0.4422972 0.663544429 0.5390468 3.928893 2.133558934 3.058713 1.739712  
4.181298 3.133437564 0.09175573 0.9034466 2.715694 2.805005 1.128933  
1.835411 1.550811 1.723927 1.318848 1.255955964 0.8264527 0.469947523  
1.086479 0.599055626 2.805409 1.025098 1.362235662 1.149312 0.6109805  
0.6870025 0.857445216 0.7261836 0.5513207 0.630038623 1.848574075  
0.142672 1.17043 1.125158 2.458035325 3.410633479 2.288251911 0.713122  
2.075442 0.4665325 0.4765421 1.39597 0.6297954 1.838923 0.8156076  
0.7492153 0.5108052 0.6855032 0.936719992 1.180226 1.320636 2.518623  
1.552879 11.78764 3.075161 1.001978 1.041108 2.394514 0.870938 3.310673248  
3.521381 0.7397499 2.491014 0.8710764 2.259329815 2.058925 4.334225  
1.767773 0.453308 3.948106 0.5933752 1.012389 2.065856459 0.4553103  
0.8756159 0.325364302 0.93636 3.121033 1.890081 1.040607 1.304951 0.566444392  
1.080452825 1.216314 4.158396 1.594332 0.465629374 2.531386025 0.898733842  
1.027946 1.066949 1.819582 2.978889 1.306161 0.509811 1.298336 2.075235762  
2.562510263 0.92739 2.414836124 9.577153 1.132135057 1.292007 1.90663  
1.197246 2.940651 1.200341 1.079213 0.8106957 0.886652 1.396107 1.572834599  
3.355997 0.8002708 0.4718012 1.109964 1.799627138 2.100738 3.553725

2.185098 1.190043409 1.323833 0.6927496 0.8377845 0.8726827 1.776547  
0.6520898 1.233173 1.190243249 2.66261455 2.779068975 0.6652251  
1.130485849 0.669006109 3.456427 0.6319057 0.561680957 2.411028 0.7287156  
0.6534352 1.230115633 0.873018 1.070483 0.5976688 0.878212299 0.8150797  
1.327765 0.5155764 0.5700779 0.6549529 1.18148 0.7921525 0.5952405  
3.534227 1.326633 1.908123 0.559444731 0.5181179 1.918196 1.966423 1.732978  
0.6887815 1.417305 0.8497558 0.555356442 0.731515205 0.847005105  
1.262827 1.145006 1.226448 3.19759 1.2236 1.28891488 1.034917 3.412468  
0.5510958 0.8535094 0.732068 0.714620975 3.53565 2.899247 1.822043  
2.661527 0.9669624 2.217533 3.417426 1.363523467 1.150773 0.6466079  
1.380101654 0.4737137 1.965565 2.847163 1.06918 3.078919 2.11428336  
2.038908107 1.173888232 0.4678795 2.581307 1.476605 0.8835606 1.298361  
1.002654 1.737214565 1.868147 1.569557996 0.3977947 3.382341 0.564579  
1.718027 1.539606 2.697190605 2.053936 1.094547 2.230358 1.071169 0.9308804  
0.4174683 1.619222 2.108730284 1.90125 1.247886628 0.4500572 0.6775362  
1.264634021 5.869517 0.5567154 0.7872593 1.771539458 0.818429 3.064878  
4.703747 2.071434527 0.8867462 0.2263547 0.3269526 1.104892 1.480013  
1.908129 0.9092278  
AC004918.1 1.047056 6.595453194 2.205952 5.865061489 4.819463833 3.582743604  
3.216532 3.606055445 0.953673 3.534604 0.926449606 1.510514 2.374095 5.719044  
2.269214 6.606874 2.220604 3.109450665 1.69705 1.578966 1.44892401 4.829407  
19.099472011 4.344549 2.545968 6.218255569 4.612189 0.7926615 0.5732509  
4.841193 1.193718 2.870752427 6.408446 4.462019248 3.454525 5.071979717  
7.387434597 5.207590025 3.844631 7.883721 3.393882535 7.868478 1.68182819  
0.9190581 4.447668543 6.097612 4.935606 3.924693 1.377333883 2.114233  
7.730715 6.870004 5.007738662 4.616717 3.576233795 5.71337 13.66276 9.655228  
0.863074 2.632455 0.7350182 7.132631 15.172392133 2.132532 1.636288 4.255403  
6.392092 2.372245 7.529189 1.219734 3.699032 9.371160843 1.346075 1.590649  
4.833731751 3.909743 0.731609506 4.858776 4.072338 4.380137 1.858024 2.9388  
6.94584 2.69947306 6.279135425 1.062702 2.407417 6.617819 3.708492168  
3.861609 1.298427 2.458296 3.946105886 3.591412 4.549947 4.585299177 3.582413  
11.768252513 1.275741753 2.519294 1.694065133 1.205553 1.300004 3.634396359  
10.09655 3.876983 2.551357945 3.567178 6.671736599 4.398787913 2.050722  
7.211603478 2.428801 10.21519 11.58284 2.422751 4.190567 3.717585773 16.04069  
6.010809 3.473172 1.485399 2.353534 2.143481 7.285522 1.566437 1.965003 5.83072  
8.615161 12.009035227 8.1704666 4.228012 14.26840043 5.358376642 2.756621  
5.203544321 2.612653 0.4844996 2.907469809 15.160364498 1.588967473  
6.954523591 1.849424 2.955 3.927106 6.877663 12.47312 3.134979 5.196983008  
2.419919 5.485934 3.417143832 5.196069 3.025815 6.751710619 5.856907 5.97896  
2.587582148 3.39703 4.298978 5.020407777 7.241094 8.777812 1.243136 3.569179457  
3.107977 6.301935 1.71662098 2.647293 4.652662738 1.525781 1.923895 3.591403799  
3.300284 8.554365521 13.43716 9.241852 4.988582 4.257281 0.9869377 4.820537651  
1.983279 4.606918 12.9361 6.923417 1.017576 0.5708807 8.739945 6.707261  
5.996751481 0.231252368 7.356628 2.238166 17.47917 1.66013 6.094295562



6.630541 8.418932187 7.515533 2.410226 1.773140541 5.695803311 6.976558  
2.131038 3.399807076 3.660416 2.486315 1.658057 3.586768 3.406657 5.597923  
2.521606 2.54599 0.6279421 5.090691 6.131841 1.960341 1.46057 4.908361529  
4.075146 4.974713 1.404239501 2.185937 1.566724 8.590385 3.199905 2.432624  
7.704045608 4.610532 4.630381 3.488106 0.4227621 3.29855 3.757691155  
3.430369 7.866587 2.235512 5.132356619 1.100323244 6.414868 2.047713 4.136792  
5.214601506 4.285471 5.658875 3.507964433 4.042232 4.988967 1.477746 1.212889  
2.606487 2.562501 6.279655425 3.034736 4.359396838 3.897805 8.320118 5.775901  
3.097547 11.79343 2.978761 4.513395 1.191991892 7.380249 7.494287 2.334806199  
3.266413 1.682282 4.525482 3.222022 7.04374 5.01387 1.870797 10.16798 8.929786396  
1.435456 2.077912874 3.361236 5.038148 3.823307 5.332476316 4.76082584  
5.470429 6.735318 7.142568 1.93359 3.327835 1.815442338 2.95792 9.846847  
1.745268 3.274263356 1.89985 2.22038 2.414431778 1.10185 2.346017341  
1.108465 5.981341 7.334530082 2.870377 2.900424 3.30521652 4.981962257  
8.426751 2.058987 4.045005 3.188499 3.93153 4.646773 5.320218 3.773696 2.951544  
5.956819714 6.390376 3.870170431 1.380712 1.829583308 6.048024 1.988956  
6.366154695 1.680553 1.800144 2.315855 4.066740168 0.9874936 1.534325  
2.483684725 6.307071706 0.9022306 3.34115 1.992979 7.630763171 4.705788323  
6.373050637 1.332396 3.553895 1.810389 1.02735 2.094608 2.667561 12.56604  
2.316849 8.183637 2.524327 3.048041 2.187707515 3.562137 1.370818 3.287608  
2.615442 10.55164 1.262775 3.69182 3.825352 7.118399 3.121521 7.092687475  
8.229238 5.390375 3.333252 1.738801 6.648591465 5.041121 12.14709 3.421471  
2.325882 10.68552 1.684312 2.453489 2.259420076 2.094033 2.436838 1.455477064  
1.130442 2.846657 6.56749 1.385047 3.524862 2.018994177 2.795145489 3.692033  
8.578676 2.419212 1.520076894 7.416931168 6.647218656 2.870366 5.708618  
4.641903 6.375315 5.363581 3.45109 3.246852 4.897726617 7.807780189 3.741563  
5.659867657 8.816762 1.877466728 3.040691 7.880623 3.06042 9.688187 5.002981  
2.152119 4.107174 2.264373 1.258639 4.311142555 9.795084 3.302639 1.64775  
3.004432 8.983033926 2.879546 1.929507 5.681867 5.827459321 3.001279 2.128181  
2.167359 4.186044 4.136354 2.994363 10.22056 10.032977702 12.231806044 5.452028044  
1.618509 4.502927184 1.286951212 6.733964 6.054623 4.203541083 2.442967  
1.466264 2.235144 3.940021574 1.921714 1.500066 2.083044 2.677651376 2.649294  
9.159854 1.389378 2.359678 3.260382 1.687445 3.469444 1.043706 18.30893 1.940724  
3.129575 3.969085332 0.4983456 2.038128 4.776969 7.051757 0.7511876  
2.660073 1.919176 1.867728626 1.991003885 3.652022009 1.633475 6.330859  
2.425214 6.446359 8.208496 3.940701267 3.546305 6.842944 2.673173 3.275259  
2.623798 2.495790552 1.242154 15.67046 2.671068 7.14042 1.230919 6.404276  
6.783603 2.859374714 3.354161 6.049899 2.159835854 2.202989 3.208357 5.270529  
5.268538 1.991301 7.634759587 6.397993606 2.40418408 0.5155452 5.237549  
2.228331 1.454589 4.235107 2.17958 2.949316546 4.073461 3.560264472 1.347631  
4.37508 0.9737155 3.605031 0.7468087 4.334611396 7.739312 3.820421  
3.511181 4.598468 3.210933 6.689975 3.651904 5.669246461 5.697329 2.331549215  
1.067278 4.119068 4.162233566 19.49166 3.600575 2.715533 4.752736162 2.688618  
8.467261 5.863881 3.125983014 2.179323 3.123107 1.938362 0.9735026 5.522326

3.114605 1.107913

AC120498.4 11.21415 0.242294798 0.2041566 0 0 0 0 0.050743105 0 0  
0 0.2692352 0.04428423 0.2117146 21.10331 0.04516418 0 0.049550435  
0 0 0.312221498 0 1.538775821 0.2692036 0 0 0.04219802 0  
15.65072 0 0.1063846 0.097982242 0.0410115 0.447363909 0.150225  
0.114775403 0.144129847 0 0 0.1028195 0 0 0.051226571 4.17261 0  
0 0.1512905 0.2196231 0.04603069 0.2642791 0 0.4736661 0  
0.4534275 0.351237248 0.2643807 0.1000792 0.2020251 0 1.192347 0  
0.04754264 0 0 0.3028706 0.1241159 0 0.1654555 0 0  
0.9536567 0 0.1993227 0 0.183167985 0.06421719 1.212744368  
0.1940486 0 40.06761 0 0 0 0.110095035 0.148129114 0.1278564  
0.04323021 1.257168 0.598227438 0 0 0.08450392 0.212185861 0 0 0  
0 1.173776481 0.15348768 0 0 0.06306223 0.06133596 0.20577097 0  
0 0.323116056 0.3239065 0.064215465 0.089321379 0 0.100596643  
0.1654048 0.6196713 0.4875432 0.2507417 0.04942918 0 0  
1.118127 0 0.09283742 0.04356302 0.04159478 0 40.10471 0.1688674  
0.1307159 0.1264039 0 0 0.04821637 0 0.051990298 0.09024651  
0.068049068 0.05767612 1.165827 0 0.070972037 0.038620737 0.048930767 0  
0.1015781 0.2239241 0.07133352 0.161943 0 0 0.1488781  
0.072765507 0.2119159 0 0.046418011 0.04417925 0.1463072 0.05765157  
0.08174104 0.2795788 0.221251945 0.04813227 0 0.3468169 1.042515026  
0.05157634 0.1102839 0 0 0.126502483 0.2824161 0.1285937  
0.11008682 0.4617039 0.124751164 0 0.2551228 0.09641586 0  
0.1515842 0.218856957 0.05131467 0 0 0.2708857 5.045482 0.0858551  
0 0.1058318 0.100555284 2.163976151 0.7010648 0.05552152 0.063247  
0.06443044 0.038692345 0.6556742 0.150059671 0.2532808 0.331406  
0.132298277 0 0.1130461 0 0 0 0.09727959 0.05249606 0  
0.3479973 0.0502612 0 0 0 0.3585212 0.1976082 0.1965446 0  
0.047623971 0.2169429 0 0 2.031055 5.003723 0 0.2524515 0.04304045  
0.265585383 0.3344952 0 0.2562826 22.99033 0.3708942 0 0  
0.07601998 0.09195215 0.194483986 0 0 0.2142308 0.1571709  
0.056267421 0 0.1635636 0.197451214 0.1137616 1.129155 0.3047852  
0.3095395 0 0.1947164 0.113612187 0 0 0.2641998 0.3250046  
0.280773 0 0.08547575 0.3853572 0.5202566 0 0.1127538 0.1669734  
0.849800786 0 0 0 1.607327 0.1177014 0 0 0.1403443 0  
0.05756775 0.138888274 0 0 0.3926758 0 0.065089416 15.76336  
0.06535023 0.05354145 0.8723816 0 0 0.1506348 0.1227667 0  
2.878754381 0 0 0.168397869 0.3059223 0 0.08604016 0 0.179478437  
0.6066823 0.4813203 12.29127392 0.745007421 0 0.04463456 0.1536836  
0.1322815 0.09009757 0 0.2448427 7.842212 0 0.05429393 0  
0.048757055 13.05204 0.207173404 0 0 0.182363806 0.2073759 0.1056487  
0.06479683 0 0 0.05199956 0.093380725 0.083386765 11.00298 0.1674926  
0 0.34002822 0 0.192491461 0 0 0.08067125 0 0.05793277  
0.5381046 0.1156292 0.1493282 0.08636788 0 0 0.242961748

0.08444722 1.420906 0 0 0 0 0 0 0.1694247 0.536691171 0  
0 0.1782364 0.5020788 0.293006835 0.5340338 0 0.040757 0.09406142  
0.2467566 0.1026045 0.2897526 0 0.03936537 0 0.168782732  
0.1942947 0 0.05767526 0.09388083 0.2787413 0.195895352 0.048737818  
0.05047701 0.0663744 7.15725 0 0 0.143451748 0 0.6037962 0 0  
0.06453059 0 0.1616429 0.056659397 0 0 0 0 0 0.3410566  
0 0.4693732 0.2235251 3.00915 0.05256855 0 0.3950348 0.116558278  
0 0.05930578 0.2936962 0 0.071812044 0.2927707 1.160719 0.03487753  
0.132286075 0.443057 0 0.2897338 0.05658802 0.09215836 0 0.4264723  
0.308719343 0.150679778 0.360410508 0 0.111702768 0.106783667 0.5312656  
0 0 0.06253605 0.5460307 0 0 0.09534275 1.735353 0 0  
1.170893 0.1020412 0.08915176 0 0 0.6128927 0.08651139 0.0411708  
0.05472777 2.162886 0.03881722 0.05276581 0.9923951 0.142152 0.1492803  
0.3371183 0.08407187 0.04324866 0.2099099 0 0 0.054922987  
0.05039165 0.2096371 0 0.08966214 0.03733779 0.243136216 0  
0.1685922 0 0.2656548 0 0.037070963 0.4075818 0.1611412  
0.1134222 0.3579508 28.99793 0 0.06689772 0.064302527 0.2387855 0  
0 0 0 0.03938575 1.267742 0.1935987 0.164517674 0 0.15223863  
0.1078722 0 0 0.08333583 0.4099717 0.5634708 0 0.1107544  
0.212402142 0 0.1815093 27.0747 0.3168806 0 0 0 0.05381388  
0 1.609647 0.3609362 0.559981 0 0.09862732 0.392327993 0.4669343  
0.2811775 0.349882079 0.3513245 0.3465553 0.2970115 0 0.4043429  
0 0.1060899 0.053727833 0.1379999 0.1174215 8.565136 0.09968045  
0.2362329 0.141406 0.04101408  
ZKSCAN2-DT 0.619145 0.721828482 0.2202139 0.90611905 0.981943193 0.741653904  
0.5024576 0.646384076 0.08199631 0.0788777 0.432574473 0.9403784  
0.5277145 1.451757 1.263354 1.048563 0.5432546 0.570108374 0.2880873  
0.3676797 0.427654915 0.5611814 2.286839872 1.811399 1.055894 0.564647834  
0.5418687 0.1877747 0.3869568 1.520928 0.4754008 0.266738173  
0.779416 1.982721768 0.4784051 1.418818038 1.475692219 1.548262218  
0.9083535 1.795628 0.815371603 1.897228 0.094723932 0.9816016 0.578100717  
1.284682 2.06707 0.9137447 0.321549858 0.101809 0.9444483 4.145757  
1.280343846 0.7142272 0.300684642 1.58883 0.447224 1.675868 0.09481962  
0.413398 0.2211877 2.021974 2.524673062 0.2965178 0.1088973 1.173025  
0.2681577 0.6841305 2.028499 0.1758793 0.4898397 1.033115561  
0.1126189 0.09829856 0.682102286 0.471682 0.425995847 1.02662 0.1890414  
2.105309 0.1260788 0.08878773 1.06689 0.13571908 2.503215587 0.4203047  
0.1421115 1.128843 0.573581364 0.3165616 0.1802649 0.221365 1.384146613  
0.9140967 0.9667685 0.805207349 0.6410254 1.024934841 0.147164217  
0.1816345 0.061417792 0.09717454 0.5922908 0.232524499 1.260293  
0.6350547 0.238991779 0.7944287 2.368241603 0.422090112 0.1882846  
1.834314384 0.4474513 2.339433 1.911566 0.1159127 0.649958 1.011561533  
1.394411 1.337607 0.2446608 0.1955099 0.2774608 0.8204119 0.9700931  
1.262302 0.9931464 1.414445 2.804826 2.643442071 1.235515314 0.3665373

1.423817634 0.998747803 0.2781273 1.139466899 0.6813743 0.09695177  
0.069551652 2.19455108 0.206307887 0.693670202 0.6800268 0.7721894  
1.426213 1.289728 2.129434 0.5017588 1.134771945 0.6271264 1.203133  
1.076415597 1.886721 0.4107935 0.228886241 1.275312 0.2304592 0.379038251  
0.7557438 0.9836865 0.495490713 1.02847 1.325987 0.2315824 1.48914781  
1.112658 1.144261 0.088813941 0.1832284 0.545808464 1.276539 0.1651283  
0.508908575 0.4695595 2.550290245 1.56444 3.948739 0.1436178 0.4571344  
0.2335808 1.079179088 0.3742758 0.197098 2.225952 1.259206 0.647895  
0.09260775 1.589984 0.7936535 1.074311349 0.063515007 1.908517 0.3536266  
1.377424 0.324324 0.926132017 1.339648 1.422074313 0.8586342 1.421376  
0.190271679 0.499966409 0.3483924 0.5094072 0.548347241 0.536653  
0.2548319 0.587821 1.125 0.4210475 1.32696 1.032798 0.1709334  
0.09701353 1.282927 3.180339 0.247337 0.1622063 1.183948749 1.519924  
0.5706471 0.229344092 0.5884936 0.7006247 1.398989 0.8687898  
0.4244632 2.26996637 1.895652 0.3061109 0.9807027 0.05573493  
0.6629659 0.218557053 0.3701397 1.233891 0.3022761 1.078871037  
0.127995301 1.188327 0.2244781 0.6404567 0.682073135 1.266461 1.571051  
0.466529996 1.197875 0.9646039 0.05740203 0.794965 0.1974469 0.4534005  
1.225479769 0.5390035 0.168604663 0.4681807 3.532378 1.348431 0.3987211  
1.088821 0.2929457 0.5745369 0.784221459 2.588813 2.564368 0.106698725  
0.650692 0.1239538 0.8181234 0.6378114 0.9008028 0.4220604  
0.3543404 3.04207 1.43643319 0.2247268 0.11414253 1.271227 0.6459273  
0.3918654 1.23841399 0.775640165 5.208631 0.8995885 1.380562 1.150106  
0.363943 0.26645186 0.2708041 4.149239 0.2537732 0.544767239 0.07514014  
0.07921661 0.376259764 0.1047567 0.325317834 0.1856147 1.897279  
0.934171342 1.510151 0.4573702 0 1.161920227 0.2151473 0.1742396  
1.215654 0.8289357 0.9394443 2.036454 1.397754 2.496953 0.2543543  
0.892407448 0.1174456 0.215376271 0.8776274 0.212826611 0.8914731  
0.1420328 0.65100659 1.033218 0.2333429 0.2729163 0.567907535  
0.1845631 0.1442299 0.100725276 1.190704116 0.3142601 0.3785385  
0.4375479 1.723246281 1.111909666 3.533026802 0.3969165 0.1137614  
0.1408833 0.185022 0.2797139 0.1737334 0.4395024 0.4193013  
0.9582259 0.07119359 0.3424765 0.299509827 0.3166432 0.7089868  
0.6104196 0.2379171 5.994923 0.6867226 0.3171394 0.2122759  
0.8327898 0.7542072 2.221884219 1.613844 0.4888286 0.7278224  
0.1684879 1.679592312 0.6034668 4.662011 1.544971 0.1256165 1.962012  
0.2055383 0.2158029 0.735727324 0.1981538 0.3266342 0.156049524  
0.2860883 1.177045 1.262005 0.260395 0.5645134 0.265637871 0.655887421  
0.9230083 1.486446 1.70906 0.113433764 1.404174936 1.024194823 0.5425807  
0.2946293 0.3016735 0.9178439 1.16673 0.1358405 0.1715888  
2.235090453 2.303270327 0.1270828 1.30007772 5.807201 0.389838035  
1.715556 1.674736 0.3144522 2.346615 1.135001 0.5715239 1.738897 0.0799618  
0.2975971 1.30515337 1.7976 0.5056698 0.4324516 0.5783614  
1.482809213 0.3141267 0.2805628 0.7703287 0.779135965 0.5552791

0.2630336 0.1711429 0.09882467 0.9135955 0.3996274 1.044161  
1.978975228 2.812044224 2.058563002 0.2380227 0.338514971 0.170031137  
0.6139828 0.3891286 1.051905689 1.265577 0.1682791 0.2785753  
1.72312093 0.2840388 0.2495788 0.122092 0.173830052 0.3942655  
0.6499189 0.2198027 0.4556963 0.2411465 3.140214 0.4399167  
0.2876008 1.630413 1.656329 0.7456893 0.211402025 0.9175274 0.8469796  
0.465173 0.6406872 0.2547796 0.3776448 0.1811357 0.149949211  
0.2972441 0.208760247 0.1501234 0.5958225 0.2253726 1.114516  
0.6443916 1.479891703 0.4412101 2.592116 0.09911764 0.1637423  
0.3462341 0.045699036 0.9862797 2.107854 0.8039684 0.9665738  
1.604789 3.139403 4.013434 0.620937405 0.6132532 0.4410634 0.283289637  
0.144254 1.646009 0.9144069 1.668617 0.5320079 1.149247058 1.25556303  
0.641210538 0.08865262 1.15307 0.1118213 0.3210369 0.9686652  
0.2938759 0.613323184 0.4721729 0.29820397 0.1150786 0.5158786  
1.149981 1.550324 0.1271719 0.875475089 0.6281783 0.5721794 0.3151092  
0.3921366 0.6228448 1.357074 0.8805924 1.326469863 0.7446917  
0.241820143 0.2926022 0.02166376 1.069302534 3.567006 0.6170873  
0.3737672 1.3258837 0.2326108 1.39737 1.934481 0.402915628 0.2929821  
0.3196579 0.1176085 0.1536007 0.6734343 1.25896 0.4887456  
AC022150.4 0.4884648 0.639767162 0.7340462 0.535910688 0.379058953  
0.830270639 0.5314456 0.610057552 0.2914713 0.192454 0.612283721  
1.280632 0.8657817 2.824844 1.028055 0.7459701 0.4518279 0.81284983  
0.5141032 0.7548041 0.713315034 0.6026323 1.509959795 1.023377  
0.8795471 0.634738668 2.166797 0.2857441 0.5424548 0.7414893  
0.6753628 0.820188426 0.7372854 0.531379282 1.355963 1.878533751  
0.291498568 1.093460192 1.361054 0.8433512 1.567115942 1.097656 0.293545517  
0.3610011 0.779081044 0.8625492 1.444909 0.0493535 0.408587021  
0.4379906 1.491561 4.183164 0.418121768 0.5434337 0.355183734 1.470432  
0.2979887 1.169022 0.648181 0.4186612 1.1837 0.4059821 1.269693396  
0.3243163 0.3006019 0.8994918 0.9069661 0.9155823 1.891417  
0.3847359 1.384052 2.005794756 0.7222647 0.524131 0.560823324 0.9921196  
0.89230557 0.8503254 0.5892774 0.3571507 0.6993431 0.6621244  
1.720516 0.420587773 1.056876262 0.1795736 0.5828792 0.3662162  
0.772990509 0.639211 0.514552 1.015946 1.13245263 1.77741 1.261555 0.23560008  
4.185045 0.857252486 0.753066893 0.5534177 0.439695557 0.318854 0.2963423  
0.18496267 1.459849 0.3409811 0.86406316 1.228297 1.558487684 0.56202216  
0.4699571 0.989011937 0.8239264 0.3249213 0.1826004 0.3099055  
0.7553223 1.301183353 0.1789267 0.6889508 0.2092128 0.3442286  
0.719524 1.065574 0.3151602 0.7623182 0.9676672 1.517675 1.888956  
0.7672612 1.11705598 0.6826137 0.592880915 1.431193585 0.3042017  
2.125577632 0.5378784 1.116549 0.234555701 1.347671266 1.327859054  
1.160044032 0.5000197 0.8046357 1.731009 0.2725101 0.6853769  
0.4451367 0.922671293 1.382392 1.996194 1.74146664 1.158791 1.013057  
0.636291829 1.191351 1.605543 0.544127176 0.8725167 0.840307 0.865119966

1.703558 0.8569942 0.6722013 1.790515373 0.4983781 0.7992482  
0.518081325 0.3599129 0.973642703 1.961047 0.3323207 0.655573199  
0.9649093 1.724089118 0.4636002 2.923879 0.2924975 0.5312402  
0.3803798 0.903707098 1.447189 0.2730629 0.8774572 1.468566 0.1584008  
0.2508127 0.969086 0.7669832 1.881174695 0.277878157 0.827099 1.029331  
0.3908523 0.5501925 2.008523968 0.4993274 1.121232373 0.6943879  
0.6795686 0.616896459 1.395380386 0.4509142 0.2405936 0.619312016  
0.3549086 0.2404664 3.556755 2.758262 1.277293 1.490894 0.5872046  
0.2974339 0.1994841 2.625127 2.013087 0.590738 0.6409766 1.701620554  
1.516163 0.2461418 0.589824966 0.2048024 1.128283 0.8265513 0.4112974  
0.5077806 0.746026357 0.4071571 0.965608 0.4391359 0.00762001  
0.9834947 0.233070608 0.1472146 0.1537483 0.4959217 0.841307131  
0.314988437 2.442173 1.2565 1.242062 1.776533179 1.378719 0.5697159  
0.427071447 0.741368 1.288746 0.194058 1.003643 1.153668 0.6563473 1.582911369  
0.7900986 0.368822699 0.9276679 1.650585 1.979607 0.6174884 0.3361406  
0.9958669 0.4749533 1.383295258 1.748317 0.7598228 0.18035722  
0.6857201 0.2580289 1.533981 0.8498756 0.2182104 4.132675 1.221799  
1.156395 0.461240015 0.135834 0.998747136 0.745184 1.768749 0.731146 1.825398304  
0.592386818 4.491819 0.5580469 2.809422 0.5881225 0.6543495 0.567524932  
0.753174 22.63598 0.8382446 0.595839168 0.4828341 0.3403839 0.624396591  
0.3952928 1.485146631 0.1595127 1.854629 0.833532818 0.6449604 1.91086  
5.84911912 1.004504388 0.5027234 0.4313003 0.6101295 0.6985652  
1.543807 1.931121 0.6799002 0.6131962 0.2782 0.768655634 0.4752877  
0.882009656 0.3599644 0.564489331 1.465601 0.4361704 0.384193412  
0.2213563 0.2789601 0.2620995 0.192770338 1.562832 0.496625 0.309520379  
1.311701927 0.2051244 0.9409694 1.247822 0.611286688 0.668883159  
1.672584983 0.6373361 0.1589895 0.6435572 0.5713915 0.6314021  
1.140125 0.3248012 0.6767306 1.038355 0.9710596 0.7491674 0.709775893  
0.5360975 0.3250066 1.709336 0.8259213 17.98306 3.892078 0.9238101  
0.6807 0.9892178 1.123152 1.471378042 2.07712 0.37081 1.026361 0.9402224  
0.921819257 0.3343069 1.435984 2.184392 0.6341219 1.436179 0.3055076  
0.9970419 0.458151367 0.5484614 0.4871675 0.493073149 0.5384947  
0.811617 1.574729 0.5326946 0.8500938 0.774777124 0.679043751 1.100285  
1.991232 1.522591 0.496272719 1.012699855 0.249831696 0.6904535 0.6897297  
0.872025 0.1894135 0.7033109 0.6359033 0.2784858 1.597922333  
0.726884349 0.6100418 0.78676975 21.39336 0.791858509 1.349243 1.410212  
0.752663 1.84585 1.058425 1.116538 1.960984 0.1669657 1.087455 1.663247343  
0.9529686 1.132807 0.3024961 0.6685249 2.622349938 0.7163928  
0.2301492 1.281455 0.431044515 0.65214 0.6107167 0.4232067 0.4895818  
1.724086 1.261867 0.2076457 0.881064191 0.750577171 0.550739652 0.5317529  
0.665196261 0.473927513 0.6342357 1.653329 1.234706373 2.139576 0.6229563  
0.2640661 2.929422641 0.3856561 0.5303549 0.4064203 0.277877367  
0.4604637 0.5789978 0.8714835 0.3322786 0.5760943 1.971242  
0.5249006 0.6476305 0.688709 0.3534849 1.229939 0.569159297 0.3391613

1.629158 0.6597406 0.732317 1.029644 0.5977062 0.245288 0.241694452  
0.6395621 0.938010569 0.7303958 0.7301966 0.4289122 0.1914136  
1.682298 1.277148101 1.047692 0.6377456 0.8953856 0.2885389 0.2613519  
0.787237306 1.246661 0.2836568 0.5564908 0.5975422 0.413313 1.736371  
0.3232137 1.148775485 0.3863495 0.6331672 0.333682506 0.8007226  
1.513907 1.345311 1.998652 0.6797707 1.922453718 1.538328803 0.299345621  
0.06060238 2.124076 1.087151 1.250038 1.204251 0.7305154 1.442900651  
0.354663 0.493218457 0.1258672 0.1971449 0.2925097 1.174951 0.2108849  
1.164782038 0.2914843 1.318478 0.5018598 0.9175191 0.3496612  
0.3812135 1.084146 1.176085198 1.019518 0.877227759 0.3147872 0.1105754  
1.715011877 1.026341 0.7073882 0.4838951 1.21154721 0.4679474  
0.9196708 2.390004 0.579536177 0.7804487 0.3892061 0.1810408  
0.5880026 1.008635 1.159847 0.7741984  
AC009120.3 1.047737 1.246897204 0.8596068 1.100413584 1.05220263 1.536459245  
0.9052374 0.822968093 0 0.1105281 0.185410318 1.343552 0.6905924  
3.268577 4.878912 2.422842 0.4810618 1.607249973 0.7058587 0.6182577  
0.779032199 1.146181 2.175683032 2.127041 1.571034 1.38096876 1.763598  
0.5948824 0.3640303 1.46762 1.194494 1.16127101 2.046578 2.471651338  
1.405614 2.887656665 0.599370385 3.303864816 0.9245863 2.661683 1.430935865  
3.366105 0.287587765 1.301399 0.595497266 0.9268214 2.029003 0.06849842  
0.344557209 0.370918 2.170652 2.954642 0.994829404 0.6128195 0.730317864  
2.473738 0.8739862 1.102671 0.1439391 1.022676 0.2398356 1.631093  
2.415358072 0.7602081 0.2519001 1.974242 0.7264666 1.238497 2.2787  
0.1907073 0.7931647 3.972307278 0.1865007 0 0.856926244 2.283278  
0.195222636 2.541923 0.5739414 1.721886 0.7108826 0.3430828 5.031975 0  
1.339803291 0.4785268 0.1617973 1.132731 1.181683828 0.798453 0.3470655  
0.210848 2.084633022 3.837389 2.005215 1.245686492 1.324214 0.457612663  
0.670199615 0.3151164 0.135613271 0.1573482 0.3826025 0.320890402  
2.259642 1.332118 0.24186465 1.919446 3.164457991 0.807897074 0.8501368  
1.568758561 0.9973725 1.062984 0.7096145 0.2346121 0.7708254  
1.860000679 0.1419057 2.047403 0.3511443 0.3474617 0.7336929  
1.816224 0.9914748 3.526774 1.580046 2.690759 1.576968 2.337569423 3.39108872  
0.5714532 0.614408001 1.426946179 0.6192353 2.67420899 0.9354099  
0.3809256 0.105581577 1.54948697 0.409545439 1.98393754 1.76966  
1.520702 4.330073 0.8899308 2.626445 1.557224 1.92413315 0.9373513  
3.467052 1.497863078 1.542208 1.647238 0.492229975 1.791284 1.003901 0.719239858  
1.172737 0.5231884 0.662461965 1.921538 2.683852 0.540845 2.601207082  
0.9008266 1.547844 0.209723629 0.1135291 0.631279446 1.479794 0.3609647  
0.755371554 0.8928076 2.217798468 1.263477 7.559195 0.3007122 0.6650299  
0.1891109 0.887373237 0.4481281 0.4521259 2.778723 2.49236 1.990191  
0.1606645 0.884389 0.9902389 2.038547667 0.231402629 1.093278 0.6926661  
0.5128802 0.2411432 2.968675815 0.8179951 2.363512946 1.042747  
0.6718563 0.474520135 1.291112196 0.5993867 0.3514982 0.760024891  
0.5683646 0.2123843 1.178859 4.697995 2.387817 3.041146 1.629979 0.3302501

0.3063207 2.050024 3.369226 0.2758521 0.2859495 1.841831568 5.548325  
0.3416237 0.376379983 0.4547972 3.163988 1.706552 1.338534 0.7785876  
3.445879747 3.164555 0.9159027 0.799322 0 1.017971 0.199065854 0.6538281  
0.5216186 0.6882968 1.425457676 0.485752149 3.469956 0.6948929  
1.045763 1.228450516 1.68895 2.142587 0.554249023 1.099918 1.816472 0.1901194  
0.7171731 0.7256633 0.7692498 3.366287021 0.9784948 0.311587818  
0.5974109 3.324804 1.138417 0.2785318 0.6398184 0.6249848 0.5679214  
0.688134471 4.044191 2.291409 0.323943986 1.326641 0.3156329 1.892475  
2.241153 0.7709096 0.772909 1.021098 7.849799 1.680424149 0.1077291  
0.490937108 2.573016 3.893934 0.7698239 3.130562284 0.812031698 8.616455  
1.875157 2.671854 0 0.7568175 0.255462464 0.493307 5.973211 0.7088336  
1.559436045 0.4847766 0.2405066 0.288869638 0.09541435 0.772971054  
0.2415162 2.009028 1.567375048 1.688413 2.55203 6.31405884 1.943382817  
0.05938187 0.4176333 1.66166 1.89784 2.529055 3.31983 2.247289 3.261219  
0.4064397 1.490172573 0.1782861 0.395378852 1.221244 0.646154866  
1.479366 0.2653664 1.080674408 0.6467865 0.3295087 0.3233526  
0.396368437 0.5784206 0.1946182 0.320370517 1.872544906 0.2770006  
0.4701545 1.200501 1.802878671 3.090180197 2.321404499 0.4102343  
0.3453868 0.3522487 0.2863764 0.5781984 0.6952953 0.5409554  
0.2483951 3.124733 0.4577256 1.192281 0.909330519 1.264239 0.9496448  
3.126001 0.5967082 14.26226 1.895393 1.709559 0.8788402 1.549666 1.58526  
2.37692464 3.418417 0.6702451 1.500938 1.127475 0.950415934 0.2379432  
5.573084 2.288112 0.4400534 3.38629 0.2560111 0.4066703 1.434794425  
0.3928864 0.5151594 0.500096983 0.4039916 0.7768654 2.158606  
0.3513669 1.713898 0.415466166 0.608035152 1.227979 2.856816 2.976374  
0.387440983 1.936108823 0.76060186 0.6652593 0.7846604 0.6215033  
0.2804157 2.898216 0.428917 0.1344398 3.216221548 2.708701557 0.5144419  
1.28231214 12.14489 0.619966596 3.065893 1.999802 0.8578433 4.2942  
2.210975 2.902883 3.115173 0.04413982 0.6571079 2.10850063 2.673122  
0.3329447 0.6106745 0.5587086 2.194956837 1.075458 0.8092159  
3.111103 0.330070519 1.160757 0.9246789 0.5421919 0.1058957 2.098264  
0.6541236 0.0886752 1.733161222 1.566521408 2.203211213 0.3075115  
0.731620471 0.199829085 0.8284844 0.499831 3.219615933 1.950442 0.6288072  
0.140962 2.691570193 0.2973653 0.5628902 0.2900965 0.243581022  
0.4463444 1.241203 0.3058618 0.4796211 0.6550689 2.580601 0.9173917  
0.3595423 2.355534 3.46491 1.767583 0.460800834 2.244012 1.684765 0.6828675  
0.9462971 0.4982036 0.674443 0.3928139 0.263568775 0.59177156  
0.719459014 0.3143339 1.482035 0.6568753 0.1118592 2.725004 3.147026266  
0.6697706 2.383733 0.4235274 0.2209475 0.2961094 0.138745125  
2.740165 1.641776 1.320679 1.212108 3.218361 10.66869 0.6259436 2.085758386  
1.1916 1.297249 0.297721734 0.3941678 3.770754 2.997309 3.4103 0.9661065  
2.531370058 2.455786871 0.379854672 0.2018662 3.685044 0.7795844  
0.8317339 2.922661 0.8651884 1.44048274 0.725409 0.353313504 0.2206647  
0.6793329 1.745707 2.297848 0.0249098 2.142266222 0.6357295 0.5059725



0.5370898 1.054919 0.4350964 1.485959 2.257053 0.829532244 1.538048  
1.076798858 0.2038856 0.0876967 1.691437732 4.382995 0.4683789  
0.5558109 3.082793291 0.2774439 1.79985 4.036795 0.971918695 0.7460422  
0.2197361 0.1057975 0.1554471 1.841972 2.734401 1.125689  
AL021707.6 1.448844 2.210754977 0.8648589 2.682678329 2.152890157 1.051750001  
0.7356206 1.223621915 0.5202007 0.3849351 0.355149498 1.432996  
0.8658425 2.483658 1.314455 3.208404 0.9334306 0.839632623 0.2244522  
1.220146 0.474797119 1.327 7.287508573 2.485518 1.552701 1.741364849  
0.8800566 0.5179475 0.5532235 3.328554 0.7280085 1.14944544  
1.603708 4.831582281 0.7506151 3.241450623 4.101780854 3.087064586 2.03196  
3.752599 1.943566453 2.910562 0.400631428 1.8764 1.146119993 2.259481  
5.127237 3.649947 0.389995253 0.2583584 1.651935 8.705423 3.002723374  
1.526816 0.877496994 3.446103 0.6196351 4.048732 0.1754533 1.991293  
0.3508145 3.408352 3.296106913 0.4598408 0.2631869 1.334689 0.314076  
1.374864 2.284282 0.6376071 0.9322916 4.694593192 0.3897144 0.03897658  
2.327837524 0.481302 0.484428471 1.454377 0.509709 6.48744 0.4570676  
0.3584552 2.361126 0.394638006 3.813344195 0.4999679 0.4789661  
2.093857 1.267121253 1.266792 0.8925939 0.5232015 4.978372954 1.861474  
1.487797 0.748363285 0.4611824 6.980503717 0.500163518 0.6584714  
0.389646481 0.4109962 1.559008 1.944556624 4.438471 1.2453 0.463286564  
1.240212 5.063997548 1.135163758 0.3981714 4.654899638 0.9342618  
4.846309 6.88452 0.8579349 1.997301 1.265431239 2.322803 1.951084 0.3668779  
0.4235353 0.4826534 1.246996 4.295935 1.031743 0.7979072 2.356968  
5.931456 5.807265138 2.37819929 0.6599063 9.078830129 1.389231576  
0.2352659 1.640938831 0.9021437 0.1447249 0.183853866 7.724532919  
0.302044055 3.125191161 2.030223 1.688142 1.75126 2.603456 5.910426 3.501581  
1.901679458 0.7039084 2.425713 2.086636141 3.775067 1.204732 0.998318108  
1.957924 1.112451 1.65322628 2.290747 1.639892 0.807502008 2.164482 3.186484  
0.5085706 1.973610057 2.252132 3.234394 0.344332395 0.237232 1.566466587  
3.313069 0.6285638 1.040331662 1.594806 4.105863152 2.68907 6.706283  
0.2827675 0.6344078 0.5268914 1.889925658 0.6019806 0.277873  
4.444448 3.619166 1.063861 0.1958406 2.695045 1.482938 2.392027937 0.16118065  
13.93563 1.411219 18.0956 1.175757 1.487803403 1.804254 3.251802238 1.848795  
3.455802 0.388003093 1.348962437 1.178811 0.5508714 2.722556431 1.385606  
0.7608017 4.926718 1.32662 0.8316024 2.718814 1.962794 0.2464625  
0.3200459 3.660665 6.654016 0.5444005 0.1659788 1.613977364 2.601547  
4.181188 1.140408353 1.561289 1.608205 1.98113 1.809836 0.869575 5.192708103  
3.488015 0.7036331 2.588924 0.08839832 1.498684 0.415970603 2.049372  
2.724953 0.6592089 2.53502548 0.406013609 3.265291 0.5584835 2.390107  
1.466849263 1.989897 3.277934 1.640735142 1.964763 2.207717 0.03310633 2.30556  
0.2307497 1.099824 5.072055271 1.092844 0.418562978 0.5596086 5.973201  
4.345977 0.3581684 4.512284 1.205517 1.48342 4.917736878 2.976149 5.767554  
0.307689807 2.651637 0.152204 1.129869 0.7394437 3.068386 0.9350467  
0.9525445 5.000184 1.797520914 0.3001496 0.724142527 3.004575 1.768873

0.804317 2.158074641 1.781673621 6.778375 1.405496 2.79157 16.77247 0.7907279  
0.40036327 0.3436069 3.360458 0.3863968 3.011752895 0.3873218  
0.1794877 1.317001661 0.1329194 0.493536508 0.3925254 2.754997  
2.37842437 1.55116 2.065135 7.53939409 2.251161101 0.7445108 0.2908973  
3.238519 1.939769 2.143258 4.359591 2.188411 3.048675 0.6794414 3.22003917  
0.1490196 0.222435447 1.39196 0.236287385 2.107707 0.2772565 1.812495672  
2.905797 0.3787001 0.1266903 0.952495151 0.1888555 0.6777947  
0.243436512 1.467335341 1.254119 1.064311 0.719675 2.179135368 2.767406066  
5.687188324 0.5893463 0.1603833 0.3154558 0.253176 0.4153225  
0.3005996 1.055028 0.3892873 2.138968 0.3985289 0.3476381 0.79172871  
1.678625 1.091415 1.726349 0.9515734 8.057098 1.386223 0.7185694 0.5509308  
1.278237 1.472258 2.798226879 5.428807 0.8003159 2.468447 0.6108114  
7.485698051 2.088279 9.177649 3.87814 0.1839083 3.956147 0.2674821  
0.472102 1.6353628 0.2309008 0.269121 0.715006277 1.603953 2.353855  
2.029793 1.621404 1.297603 0.638355527 2.001129131 1.579077 2.335946 2.77803  
0.269867242 3.150992085 5.188804567 1.323938 1.213331 0.9911142 1.721259  
2.649565 0.5860231 0.5267384 4.246569912 6.468729235 0.8510294  
2.888874924 4.550558 1.118832514 3.276066 2.311683 0.6071576 3.976767  
1.873006 1.048991 2.021373 0.6917636 0.3861847 2.354904524 5.934903  
0.2319085 0.6699385 0.8756135 2.714524532 0.636026 0.3559891  
1.545693 1.580607554 0.9528883 0.4976933 0.7553142 0.5900828 2.19228  
0.7716175 6.578038 3.661876684 5.172009215 3.476383227 0.5783219  
0.910002187 0.173985609 2.164015 0.09495031 3.011211321 0.6928637  
0.2737425 0.5302008 2.81217008 0.3417581 0.542872 0.4041263  
0.763485118 0.4239487 1.064055 0.6391328 1.734616 0.3623402 1.497905  
0.676586 0.3219875 7.347565 1.922209 2.226258 0.27511298 0.9432133 2.64038  
1.199918 1.940776 0.4109419 0.56373 0.2188877 0.125171988 0.247314713  
0.429540267 0.1313672 2.504829 0.4861346 2.454296 2.068407 2.059972828  
0.3314751 2.563791 0.4425041 0.4039829 0.928131 0.289923622 1.593803  
5.881161 0.8870491 2.599491 2.833272 6.733298 4.926724 2.682109483 0.6536205  
2.841914 0.414748811 0.2974321 1.518924 2.13052 2.581959 1.892614 1.715540714  
2.45093457 1.984373182 0.1054555 3.644816 0.7356908 0.6245944 1.90851  
0.7062144 1.505025755 0.6496389 0.507573346 0.1921266 1.419543  
1.399757 1.419832 0.2862851 1.119126856 3.622987 0.5286434 1.157382 1.82648  
1.573586 3.5285 2.498552 2.62806017 5.431533 0.971631037 0.2738841  
0.3206913 2.536823222 7.28885 1.995105 0.6775007 2.156154746 0.2371706  
2.494534 2.385403 1.190547502 0.8094494 0.612218 0.1381724 0.1948946  
1.462623 1.904613 0.347492  
AC104984.4 5.504744 0.346135425 0.07291307 0.186677304 0 0.18200514  
0.1535671 0.144980299 0.2850653 0 0 0.06410361 0.06326319  
0.3024495 0 0.1935608 0 0.141572671 0.07028446 0.1573245  
0.148676904 0.07094481 0.146550078 0.2563843 0 0.218114832 0.1808487  
0 0.07579039 0.1639566 9.498623 0.139974631 0.1757636 0 0.1430714  
0.273274769 0.068633261 0.246063103 0.2920645 0.07344252 0.065541973

0.5981107 0.073180815 37.07662 0.071778688 0.1768822 0 0 0 0  
0.1227452 0 0.168765702 0 0.669023329 0.1888434 0.07148516  
0.5050629 0.05494106 0 0.1098533 0.06791806 0.338669467 0 0 0  
0 0.05909124 0.4936542 0.08735076 0.4541222 0.198847935 0.07118667  
0 0.065417137 0.04586942 0.055886837 0.06930308 0 3.943427 0 0 0  
0.471835863 0.42322604 0.182652 0 0.2660673 0.142435104 0 0 0  
0.227341994 0 0.06655507 0.142642226 0.1837992 0.838411772 0 0 0  
0 0.08762281 0 0.06899978 0.08028391 0.092318873 0.1156809  
0.183472756 0.191402955 0.06713673 0.071854745 0 0 0.1160817 0  
0.2824525 0 0 0 0.06186025 0.1326249 0.06223288 0.1188422  
0.06678395 10.01541 0.06030979 0.4979652 0 0.475862347 0.26596571  
0.137761 0.100507431 0.074271854 0 0.388851817 0.08239445 3.093011  
0.080600222 0.304165873 0.055172482 0.069901096 8.582481 0.2902232 0 0  
0 0.6202296 0.178646291 0.06708443 0.4253661 0 0 0.1077849 0  
0.1262264 0.2090103 0 0 0.3993983 0 0.3438019 0.09312879  
0.06193159 0.07091939 0 0.2363226 0.480304562 0 0.090358916  
0.242071 0 0.078633443 0 0.356431897 0 0.4252047 0 0.132438  
0.1443659 0.156326398 0.1466133 0.06090877 0.2356953 0.2902347  
6.995837 0 0.08439203 0.2267824 0.359126014 4.327952302 0 0.07931645  
0.09035286 0.09204348 0.221099113 0 0 0.07236595 0.4734372 0  
0.239746823 0 0 0.082885368 0.1735542 0 0.2249831 0 0.05523766  
0.07180172 0.1265404 0.1080474 0.05396378 0.0853622 0.752793  
0.0701945 0.2182918 0 0.3099184 0.1117685 0 0.07439762  
3.378248 0 0.09016125 0.1229727 0.151763076 0.3185669 0.06169355 0  
3.681553 0 0 0 0 0.138917133 0 0.2631397 1.346594 0.07484328  
0.16076406 0.1645956 0.3504934 0.211554873 0.1625166 0.1697978 0  
0.3158566 0 0.09272208 0.649212497 0.2318201 0 0 0.2785754  
0.3008282 0 0.1221082 0 0 0.189114098 0.08053843 0.4770669  
0.067444507 0 0 0 0.04502317 0.1681448 0.6521419 0 0.2673225  
0.366521083 0 0 0 0.06462177 0.08013792 0.073912852 0.185969759  
18.8046 0.09335748 0.1529756 0 0 0 0 1.75381 0 0 0.06530735  
0 0 0.1456773 0 0 0.07189112 0 0.2666735 0.1146001  
5.16440081 0.483771052 0.2719902 0 0.07318265 0.5669207 0.2574216  
0.2790093 0 0.4586089 0.1861639 0.077562757 0 0 8.221091 0  
0.0770003 0.3798353 0 0 0.6791703 0.1851338 0 0.08279291 0  
0 0.11912395 2.39655 0 0 0.1619182 0.11894226 0.183325201  
0.2348775 0.08788859 0 0.05045024 0 0 0.0825923 0 0  
0.1747122 0 0.809872493 0 0 0.1022729 0 3.038429 0 0.04500224  
0.1341801 0.1867901 0.2420352 0.383350836 0.6263027 0.1096415  
0.1273117 0.09563405 0.334864955 0 0.3381022 0 0 0.1410038 0  
0.1034831 0.448082106 0.05623625 0 0.120559094 0 0.177916 0.08239323  
0.06705774 0.113772 0.055970101 0.069625454 0.2163301 0.2844617  
10.99717 0 0.085269903 0 0 0 0.1498267 0.08027526 0.1843731 0  
0.3078912 0.242825989 0.126600209 0.1963606 0.183545237 0.5754612

0.129075838 0 0 0.1267493 0.3352666 0.1824694 2.249364 0.1501959  
0 0 0 0.6377008 0.08472254 0.1398554 0 0.41035454 0.09294309  
0.1950788 0.1993002 0.314966846 0 0 0.2069527 0 0.4607918 0  
0 0.352822106 0.430513651 0.617846585 0 0.079787692 0 0.09486886 0  
0.178391018 0.08933721 0 0 0.086819386 0.06810196 0.099163 0 0  
0.09292804 0.2186597 0 0 0.176497 0.2188902 0.06179385 0.1176309  
0.4690952 0.2808942 0.2218127 0.150759457 9.628595 0.1015372  
0.3554292 0 0.06005133 0.2471352 0 0 0.203289382 0 0.1439761  
0.09982719 0 0 0.1066794 0.60784054 0 0.3211279 0.05105017 0  
0 0 0.1293911 0.1534678 0.1080211 0 9.008537 0.4340926  
0.3822727 0.183721506 0 0 0 0.1003016 0 0.1125307 0.1131913  
0.06914239 0.313366998 0.167886283 0.108741879 2.619754 0.2813136 0  
0.0595256 1.004012 0 0.080462505 0.1582206 0 0.1684539 0  
11.06418 0.05658582 0 0.181710081 0.1323576 0.07725116 0 0.1380544  
0 0.2062492 0.06153637 0.061283128 0.4931366 0.224187424 0 0  
0.249915771 0.3345947 0 0 0.058348323 0 0.168244 0.4546712  
0.230262142 0.06571423 0.0838725 0.5451642 0 0 0.2020086  
0.1757746  
AC009118.3 0.5432473 1.57644267 0.4677127 1.484865065 1.545761596  
0.513700647 1.063887 0.539399785 0.1828598 0.2164984 0.381333591  
0.4934436 0.7953915 2.153523 1.857232 1.489952 0.5855634 0.799163944  
0.7934979 0.4036734 0.896489373 1.110412 2.820207691 0.8880942  
1.247547 1.45509826 1.144615 0.3204392 0.7973184 1.262072 0.5069414  
0.969721153 1.127464 1.850656131 0.9177549 0.729233565 1.46166046  
1.310081673 1.498796 1.940969 1.143568539 1.312996 0.657202281 1.177699  
0.810367414 0.8850188 1.746859 1.167298 0.691778521 0.2421801 1.291285  
3.385655 1.342392941 1.855954 1.223094196 1.017548 1.614107 2.017937 0.4933996  
2.048706 0.620111 1.394149 2.085552183 0.6113014 0.4070654 0.5914344  
0.3238496 0.8945588 1.284745 0.2913693 0.4952169 2.334242421  
0.6940904 0.328823 0.889613121 0.5884737 0.172077684 1.226974 0.9106142  
2.02366 0.2892013 0.4896131 1.133196 0.58515574 3.067782794 0.8435884  
0.4436915 1.979809 0.858852679 0.9731432 0.8785353 0.4801139  
1.166657656 0.5637402 0.8538566 0.640501173 0.8253067 2.312595129  
0.806411024 0.6249538 0.239070818 0.508543 0.7194505 0.754257852  
1.611101 0.5973932 0.450067725 0.8756235 0.776764385 1.080451045  
0.4478858 0.94028477 1.333848 2.195704 3.186995 0.8271891 1.014629  
0.813387974 2.47384 1.560081 0.4603026 1.310145 0.5429159 0.7165927  
1.182374 1.077666 0.7737339 1.03814 2.409347 2.289372116 1.637836947  
0.8306691 1.598908598 1.048143456 1.058562 1.222232975 1.162772 0.7529261  
0.47566133 2.419390406 0.481321444 0.807105439 0.7544398 0.6143557  
0.8043827 1.072046 2.097407 1.452176 1.191793812 1.015565 1.182385 0.746825827  
1.683028 0.9403087 0.901774866 1.246938 1.108337 0.549439933 1.438193  
1.178522 0.616362808 2.0113 1.02751 0.6515231 1.3465748 1.096514  
1.455292 0.86267761 0.400278 0.788285802 0.7867537 0.3535221 0.786874867

0.6769542 2.492165289 1.732396 2.696373 0.4064265 0.8665361 0.4259869  
1.444004665 0.6959515 0.4219659 1.834445 1.414936 1.142296 0.6923481  
1.710654 1.881454 1.474350097 0.430599738 1.99157 0.6308974 2.619716  
0.8502161 0.936062226 1.148285 1.43012195 1.355473 0.9718207 0.630424778  
1.250821149 0.8287456 0.1652404 0.744354274 0.9351649 0.7309898  
0.461821 0.6118258 0.5669295 0.9395908 0.8117142 1.10894 0.4015449  
1.861737 1.086505 0.900548 0.7094691 1.187053401 0.7156879 1.405236  
0.221171743 0.9544712 1.042688 1.247953 0.879098 0.5364034 1.499203629  
1.655234 0.997273 1.456084 0.1491532 0.6253794 0.877326316 0.7684165  
1.699782 0.6403998 2.976295594 0.513795572 1.228829 0.628214 1.094615  
1.216871601 0.9924756 1.408933 1.139924537 0.8339915 1.568441 0.4282587  
0.9887434 0.7416012 0.7613194 1.290988425 0.8129195 0.523137132  
0.8594816 1.739315 1.723875 0.390298 1.848548 0.5508886 1.072694 0.388192972  
1.818526 1.866736 0.605687209 0.7795725 0.3138808 0.9730639 0.5776168  
1.445314 0.9322716 1.37149 1.629045 1.669287317 0.5064379 1.204865054  
1.778798 0.9119591 1.33655 1.384447833 1.622389103 3.574079 1.29353 1.19717  
0 0.6759863 0.625487991 0.4417241 3.825034 0.4708612 1.638357832  
0.6870363 0.2422776 1.033920476 0.4672352 0.605626805 0.315382  
1.125224 1.052611225 0.9921599 0.9115497 3.44530015 1.191639486  
0.7327846 0.5071877 0.8825509 0.8970292 1.221942 1.610775 1.307751  
1.428885 0.6209729 1.333404184 0.7333624 0.554032062 0.8916108  
0.854323315 1.560822 0.6042557 0.985976135 0.9501761 0.7164266  
0.4750283 0.768627867 0.3823837 0.2477871 0.444975732 0.794705484  
0.3436331 0.8595265 1.110214 1.267153657 0.991866727 1.552279368  
0.3917315 0.4735715 0.5914044 0.3106764 0.6795322 0.8171511  
0.5086096 0.6021021 1.076383 0.4184021 0.7983796 0.474976766  
0.7893349 1.339293 1.062794 0.7566507 4.434088 0.7239621 0.3925969  
0.7574334 1.166243 1.117853 1.180351716 2.356945 0.7314457 1.535324  
0.5643833 1.13846413 1.482116 5.313587 1.225044 0.5171762 2.17078  
0.5453433 0.6638089 0.804802684 0.4328838 0.7416703 0.433073676  
0.7834104 1.04997 1.162754 0.7570688 0.9049627 0.416473968 0.893247517  
0.9436253 1.289473 1.061062 0.430046177 1.772207461 1.288272283 0.8749287  
0.9037346 0.8265353 1.462426 1.324614 0.4265361 0.888758 1.682258399  
1.461775614 2.01534 1.059642603 3.592952 0.69550142 1.146477 1.150138  
0.5691378 2.351346 1.474805 0.8593219 1.849835 0.7003215 0.6274703  
1.324465202 1.767154 0.6521598 0.5023899 0.469019 1.210851426 0.6319704  
0.7508189 1.201737 0.872815343 0.7795366 0.4281081 0.9558228  
1.078608 0.8107402 0.7191662 1.406919 2.285866931 3.111402211 1.928794836  
0.4517565 0.982677275 0.508843134 1.582234 0.7743399 1.068030227  
0.7449884 0.2463369 0.5135666 1.069280681 1.083391 1.017755 0.6061123  
0.763387945 1.81215 1.327821 0.5718784 0.8455176 0.6566579 1.544518  
0.7452069 0.2716424 3.009087 1.099123 1.266339 0.541559744 0.8336271  
1.61529 0.820785 0.8855954 0.3543923 0.8560559 0.6617091 0.535042144  
0.330354948 0.946210456 0.5726061 1.511244 0.7398313 2.760731 1.149645

1.203148285 0.7871531 1.606743 0.5108526 0.3245878 0.3654051  
0.557126043 1.1952 2.677688 0.6652022 1.480772 1.138223 2.163999 1.152511  
1.107800697 0.7177241 0.8606625 0.777555045 0.5275889 0.8809823  
1.284887 1.379559 0.7806041 1.165883172 1.313859201 0.613837317 0.3163264  
1.255954 0.7093259 0.6109385 1.373952 0.969156 0.929051604 1.217918  
0.259521517 0.3457839 1.44154 1.025828 0.5952855 0.0878263 1.538603576  
1.460331 0.654113 1.104633 1.115821 0.2163405 2.03745 1.026311 1.525268964  
1.789527 0.345140777 0.2567337 0.3607318 1.410750194 2.33948 0.8256988  
0.6804387 1.616910241 0.5632085 1.618842 1.536056 0.807456094 0.8936533  
0.6456165 0.5439847 0.3105737 1.342171 1.071208 0.5562505  
AL031714.1 0.5035899 0.65633877 0.3092593 0.926857598 0.536092435  
0.693260241 0.6820033 1.041765323 0.1137975 0.1094694 0.141257137  
1.145154 0.6376772 1.731825 1.030958 1.571138 0.5301202 0.427398716  
0.4699618 0.9067275 0.4154607 0.991236 1.162737266 1.484048 0.5434626  
0.663916476 0.4843043 0.1076394 0.1323673 0.989949 0.428477 0.412097287  
0.9092146 1.580857603 0.7353406 1.630906745 1.078806609 1.445792023  
0.8088541 1.070111 0.739139418 1.409374 0.157023304 0.7912065 0.68769388  
1.23128 1.752529 0.3287741 0.436414826 0.1883923 1.40874 4.480677  
1.149516623 0.3124532 0.54666464 1.583104 0.1997572 1.483348 0.1590096  
0.7915336 0.2137844 1.186183 1.126634895 0.5349738 0.2302959  
1.061718 0.2089817 1.073304 2.955987 0.2833208 0.4588769 2.832863246  
0.1101181 0.02557919 0.85851067 0.5882404 0.114338319 0.7953875  
0.367302 0.7871042 0.4561894 0.2408447 0.9848176 0.239369022  
1.557517081 0.1868429 0.1510024 0.5509827 0.813806093 0.5880342  
0.1525478 0.1174659 2.015505707 0.9031719 0.893371 0.583660592  
0.2476314 0.993617872 0.412127014 0.1620509 0.313830378 0.2966973  
0.7739071 0.535398738 1.477078 0.8933708 0.354715064 0.7388733  
2.06450788 0.821382608 0.1943062 1.473654539 0.6602926 1.807432  
1.019471 0.3664214 0.8104228 1.087514579 0.7135432 1.519557 0.2839866  
0.1091962 0.4596 0.8924947 1.409649 1.381075 0.9570032 1.248629 1.20744  
1.543451943 1.268767229 0.2921553 0.9228145 1.223028608 0.2927131  
1.057496767 0.6948372 0.09893622 0.193052703 1.452009777 0.217494372  
1.203376409 0.5115372 0.5539391 1.436626 1.113623 1.419933 1.663525  
0.909269426 0.7197118 1.719279 0.829938513 0.7855382 0.8013873  
0.38052635 2.424987 0.5562432 0.509604431 0.7866369 0.2889832  
0.271278839 1.276379 1.640428 0.4141097 1.043963747 0.8750399 0.8411939  
0.202008245 0.147904 0.969410872 0.9220518 0.4354252 0.474778534  
0.5200212 1.720782371 0.604296 4.07075 0.3470885 0.4460822 0.2917548  
0.787865544 0.3657985 0.09117998 2.607052 1.216542 0.7087596 0.07038244  
1.17912 1.403232 1.118226727 0.017629695 1.674185 0.4037029 1.46529  
0.2480191 1.117070147 0.612813 2.008372695 0.7113755 0.8622906  
0.238131004 1.188355234 0.2780193 0.196828 1.029853923 0.5802409  
0.2011037 0.6399163 1.07667 0.9564519 1.268342 0.8334925 0.1671377  
0.07001226 1.729378 2.436977 0.0595457 0.3885065 1.235740744 1.694948

1.176793 0.262376004 0.3304057 1.358362 1.087799 0.557879 0.2822702  
1.768281562 1.720786 0.3817331 0.8038448 0.02417218 0.3965899  
0.242657241 0.04669941 0.7640948 0.2163098 1.081381219 0.26645491  
1.827781 0.2779417 1.314601 0.934573158 1.359298 1.084351 0.60876026 1.06235  
1.122655 0.1774349 2.338957 0.1442232 0.7310358 1.498293934 0.748049  
0.183127131 0.3884426 2.159264 1.090818 0.2301585 1.322218 0.3818376  
0.5284852 0.968839375 2.089801 1.666386 0.050481965 1.400723 0.2053234  
0.5870208 0.975044 0.6544501 0.102274 0.3750763 2.137627 1.175088312  
0.2010832 0.346524541 1.141577 0.9802816 0.6198237 0.903617137  
1.090381837 0.2316901 0.614924 1.38547 0.1243761 0.5604462 0.136239059  
0.3033501 1.032673 0.2782347 0.891056684 0.254188 0.1256454 0.249089296  
0.1562891 0.480932981 0.1809354 1.413416 1.015005405 0.8383375  
1.403896 3.81399456 0.975258302 0.2578726 0.2640887 1.592183 1.702067  
0.7931958 1.420095 0.8228173 1.016724 0.3669366 1.172719853 0.1018721  
0.079940283 0.896586 0.162452747 1.133477 0.144048 0.441995592 0.7797963  
0.1882802 0.2263342 0.280839709 0.347033 0.4374033 0.166416974  
1.093743093 0.5416599 0.2537201 0.5037886 1.191752579 1.872552328  
1.733523758 0.2519871 0.2543659 0.02300272 0.1409775 0.2973426  
0.3260513 0.1854601 0.2093499 0.9112013 0.2644489 0.3517232  
0.542681323 0.8728784 0.506449 0.9619892 0.3912035 1.402456 0.7797755  
0.444629 0.1841277 0.754983 0.6441333 1.2548698 1.895976 0.2352566  
1.280094 0.3412063 1.587419523 0.1794672 3.180224 1.228975 0.2447399  
2.072118 0.1243413 0.2607709 0.950265461 0.2357187 0.2796424  
0.294777593 0.2539234 1.962031 1.14297 0.5153094 0.8203543 0.368662049  
0.809510288 0.7700303 1.372142 1.854886 0.162347179 1.348818277 0.618673611  
0.5176968 0.2761851 0.8485617 0.4526459 1.315625 0.4373768  
0.2150917 1.966986077 1.080261622 0.1812694 1.135698928 1.789925  
0.264074959 0.9794385 1.322592 0.3921351 1.684125 1.065306 1.099979  
1.319074 0.1664609 0.3895494 0.868279979 2.1702 0.1141461 0.3942993  
0.4606238 1.197880572 0.5588594 0.5451256 1.292854 0.414922687  
0.4326936 0.2689825 0.3769315 0.3025423 1.064266 0.2122016  
0.4914866 1.183985788 2.044420363 1.253769322 0.2565381 0.501654669  
0.213139153 2.220215 0.06750588 1.421299672 0.797965 0.3173803 0.2577447  
1.122056912 0.1699136 0.1929802 0.1989123 0.250526527 0.3570557  
0.4437167 0.2065445 0.5101619 0.3654971 1.419934 0.4717752  
0.5811053 1.525404 0.9145801 1.322674 0.218162938 0.5600507 0.7701353  
0.8229426 0.6688797 0.2307341 0.2435567 0.1825547 0.098576078  
0.18597499 0.148777796 0.2011625 0.6924079 0.3440584 1.08018  
1.402683 1.321569096 0.6646977 1.850796 0.2776656 0.2966844 0.2402582  
0.150629175 0.4455042 1.696248 0.5174618 1.184702 1.16127 2.992328  
1.359116 1.411819353 0.3676733 1.377279 0.544375138 0.2302312 1.03836  
1.504888 1.669048 0.6072331 0.98121776 1.168659069 0.461226413 0.06536254  
1.631155 0.4282087 0.3386156 0.7723746 0.3089787 1.272773792  
0.5329239 0.131223422 0.1008697 0.7633982 1.252664 1.267805 0.1423338

1.487035319 0.5349737 0.3584977 0.594602 0.7646659 0.09944506  
1.126951 1.271249 0.911287895 1.48699 0.536971082 0.2529704 0.005010961  
0.99142349 3.518723 0.3458605 0.2434846 0.987021227 0.1585305  
1.322265 1.894446 0.440450937 0.4295652 0.2720391 0.1209047 0.2309371  
0.8546272 1.239862 0.760163  
AL031710.1 31.81967 0.745522454 0.5932756 0.134024731 0.816974638 0.319416428  
0.1837555 0.45104982 0.06822076 0.2019264 0.067746078 0.09204622  
2.604064 0.8323823 3.296275 0.6176298 0.753311 0.237164474 0.2018426 0  
0.177903988 0.9847382 0.210430882 0.1533923 0.1396293 0.365388949  
0.6059203 1.086804 13.16809 0.7847498 14.73017 0.234487416 0.6169251  
0.699176805 0.3766325 0.026159636 0.229950754 0.264991034 0.1747395  
1.054559 0.188223102 0.5089337 0.315240435 29.24394 0.377911727 6.47661  
0.9827414 0 0.37768771 0.7679905 0.2937492 0.1295497 0.161553493  
1.033453 0.640432588 0.4519328 2.668779 0.4489448 0.1051863 7.694206  
0.315476 0.162539 0.702425562 0.08771632 0 0 1.235668 0.2828299  
1.046378 0.08361782 0.05433941 0.14276262 0.2044335 0.9405182  
1.502916797 0.3073643 0.187244788 0.5970727 3.397292 47.87265 0.419589  
0.3223471 0.6275483 0.037639328 0.607709185 0.1748463 0.2955912  
0.1591855 0.238609234 0.06483165 0.0585288 0.2022316 0.398981961  
1.101668 0.06371084 0.716868621 0.3958751 0 1.679181453 0.2158851 0  
0.4743142 0.04193912 0.351745248 0.3963064 0.03842648 0.044186811  
0.1384216 0.482988111 0.488595578 0.353472 0.309528131 0.6785837  
0.1412356 25.1689 2.057368 1.892673 0.806055751 1.866606 0.4439212  
0.02960832 4.47524 0.08936003 0.6825809 0.3516146 26.39112 0.02886623  
0.5064774 0.4321499 0.455526349 0.076379896 0.3956215 0.048106121  
0.106646764 0.2776816 0.139587832 0.1577466 1.594294 0 0.388223109 0  
0.334569349 12.01928 0.4861859 0.1837326 0.4389755 0.8120221  
0.1113233 0.48453353 0.2247615 0.6447145 0 0.1931997 0.6706614  
0.253910485 0.2114562 0 0.078839754 0.1676739 0.7168687 0.302566763  
0.06582191 0.8914893 1.007844 0.339443232 0.3526588 0.1508155  
1.182288153 0.2737799 0.302740984 0.03862101 0.5275638 0.752730395  
0.7892375 1.961898645 1.23108 1.250174 0.6592537 0.1267783 0.7600802  
0.224468674 0.9473477 1.049505 0.3008304 0.3241368 28.6139 1.526313  
1.090605 0.2894545 0.550045998 13.950908519 0.2396803 0.1138903  
3.805632 0.52866 0.185194129 0.09962761 2.462517677 0.06927339 0.05665061  
4.500402919 0.038250205 0.4637788 1.0403 0.119014887 0.2076717  
1.263803 0 0.1113454 0.7402791 1.099732 0.03028318 0.051715 0.05165763  
0.08171424 0.0900778 0.9071289 3.726508 0.130253597 0.2373392  
0.1604881 0.041257037 0.6409641 8.764278 0.4572685 1.122007 0.794593  
0.690068004 2.553981 0.1476427 0.219045 68.95418 2.536029 0.181839001 0  
0.05197947 0.4086762 0.531922013 1.17140999 0.4785994 1.962867  
0.9672055 0.0769469 0.590856 2.320646 0.54003751 0.1555715 0.3250829  
0.2084001 0.1209434 0.5533486 0.443798 0.427259507 0.2958844 0  
0.7903413 0.5333409 0.5279492 0.6341131 0.7013394 0.5269842



2.356718 0.120688199 0.501128 0.6279342 0.871590549 0.6006489 0.1596841  
0.2593055 0.5818379 0.764556 2.497091 0.2398458 0.511797 0.263143342  
0.9840641 0.221588129 0.6083262 0.1855805 6.252128 0.106131275  
3.604952258 6.111445 0.1340518 0.4393144 34.99468 0.3982025 0.186684108  
0.1802468 3.693494 0.6418618 0.51799449 2.719465 0 0.201501723  
0.03486294 1.459230611 0 0.3440943 0.122720299 3.382423 0.2194053  
2.47184996 0.787265029 0.6509167 2.105836 0.3502759 0.1356733  
0.2464207 0.367243 0.6935715 0.03135787 0.5346246 0.222744327  
0.0390858 0.233367103 34.80544 6.69329459 2.395565 0.2908824 1.496318411  
0.4253865 1.011338 0 0 0.07925475 0 0.861975919 0.114033183  
8.400577 0.1717872 0.5177442 0.232497928 0.540831473 0.614217769 0.11242  
3.070843 0.05515983 0.0965885 0.4357337 0.1051242 0.7510958  
0.4084189 0.3543298 1.393716 0.638265 1.052142043 0.1443542 0.2081914  
0.1468534 0.03442548 1.99965 0.5194106 0.5169488 0.5780065  
0.1490063 0.07723062 0.33027149 0.4996147 2.466465 0.2742098  
0.732377 0.160277243 4.903461 0.8900467 0.4180205 0.03215775 0.3037005  
0.4209414 0.1981214 0.035744442 0.6729123 0.0847041 1.009811216  
0.04428369 0.1703128 0.03943608 0.2246721 0.3811847 8.3582017  
0.066650007 0 0.04538421 8.634919 0.660636547 0.08162589 0.343303328  
0.2083505 0.3440434 0.03585596 8.683451 1.279581 0.07233216 0.4789418  
0.309931747 0.121189944 0 0.746731048 4.590573 0.123559776 0 0.3264816  
0.181999 0.1604695 0.2183395 6.005141 0.03594431 0.04838403 2.070838  
0.637583745 0.5494038 0.1622038 0.6024538 0.4811954 0 0.3558846  
12.23161 0.09539153 0.512561432 0.4544174 0.5835823 0.7429072  
2.515023 0.2835642 0.5319827 0 1.013232714 0.034342969 0.049286907  
4.550578 0.343700826 1.277753285 0.09081464 0 0.512302411 2.330403  
0.6605499 2.070515 0.083109155 0.09778744 2.135819 0.3179904 0.311502653  
0.1334351 0.03488588 0.0914377 0.3639728 0.6758177 0.5238399  
0.5323778 0.08445292 0.860676 1.210006 0.2123335 0.75766291 25.61567  
0.04859898 8.165759 0.1152541 1.264671 1.449015 0.3157619 0.052529441  
0.097300901 0.112662538 0.03445583 0.716708 0.06000304 0.2452298  
1.404156 0.083123493 4.057264 0.883788 0 0.6660292 0.03245814 0.050695334  
1.393442 0.6978193 0.6721314 0.4545407 24.98872 0.3561786 0.2744522  
0 0.228581 0.04587048 0.072521961 0.5280838 0.2489956 0.5116781  
0.4334161 1.555408 0.487459775 0.120533741 0.052047395 31.01557 0.9155917  
0.2205276 0.7122721 1.401613 0.3556423 0.038511968 0.302918 0.726161169  
0.04031375 0.330957 25.89986 0.5416763 0 0.217430867 0.4434547  
0.443699 0.07359163 0.03303867 5.172884 0.2961528 0.3534397 0.205324668  
0.4383437 0.134129228 0 0.6729035 0.98684689 1.481368 0.3554414  
1.370822 0.139637013 0 0.4026352 0.1813503 1.469479195 0.9121359  
6.182192 14.43831 0 0.2826718 0.03222929 0.5047887  
AL162586.1 0.4784058 1.837429173 0.6541734 2.512292694 1.091010504  
0.780184027 0.5893913 1.22126707 0.1136709 0.3028087 0.246924956  
1.214174 1.141497 2.30653 2.788196 2.276902 0.6825058 0.635092356 0.420393

0.5646038 0.503926703 1.555924 1.884606613 1.95523 1.337757 1.402457984  
1.207911 0.1018607 0.2719954 1.60177 1.105983 0.76746215 1.302439  
1.783881008 1.05543 1.71626771 3.030981628 1.925577924 1.062715 2.782122  
1.705316385 2.669863 0.284516067 2.965209 1.330924464 2.468636 2.07915  
0.4222393 0.471983574 0.2822741 2.734809 2.758942 2.044115424 1.226898  
0.550224794 2.22141 0.3420598 2.812348 0.2793265 0.8596361 0.3832887  
3.107727 2.565869609 0.538946 0.3378707 1.060537 0.2859578 1.31952  
1.863012 0.2960674 0.5092959 5.585087159 0.5109473 0.1873721  
0.939072178 1.152309 0.300848769 1.209026 0.3996517 2.453986 0.5617995  
0.4475847 2.648482 0.595796895 2.383777818 0.3004369 0.3693903  
1.578168 0.731255613 0.6413919 0.298661 0.6438394 1.571327428 1.736541  
0.995216 0.405263893 0.6412931 3.008879631 0.400739232 0.4496404  
0.48763744 0.3771946 1.231633 1.113562527 2.799542 0.4721994 0.285296953  
1.153205 2.222249462 1.189361665 0.4618003 2.793605031 1.083559 1.875285  
3.506319 0.5624113 1.879497 1.639332421 1.879066 2.049505 0.3823387  
0.4362987 0.6824291 1.356504 2.190347 1.631828 0.5831825 1.780885  
1.512121 2.94115544 2.746820936 0.8926573 4.45864742 2.102749552  
0.5783488 1.434269632 0.8378052 0.4111167 0.28925687 2.395424697  
0.275003024 1.491223382 0.6733688 0.9402871 0.8801504 1.046352  
4.143589 2.759152 1.804642905 0.9964442 2.275687 1.886009415 1.388252  
1.982436 0.773426931 1.535165 0.9445614 1.075546866 1.594805 1.134739  
0.384409254 1.096739 1.179051 0.4259967 1.201873766 1.175215 1.342842  
0.752413021 0.1969859 1.432231045 0.7319944 0.4120492 0.63494668  
0.5062921 2.362888088 1.388869 6.406645 0.5492314 0.9571845 0.3382029  
0.958412309 0.6723203 0.4250331 10.13465 2.025314 0.8453385 0.2261959  
2.692132 2.200472 3.078862277 0.167295759 3.419524 0.5297647 2.458949  
0.7799323 1.768792907 1.234638 2.302651292 1.312957 1.297896 0.52754453  
4.142665769 0.9981461 0.1765469 1.305509091 0.4498352 0.3671255  
1.540071 2.93943 0.9581411 2.154499 0.9524041 0.269277 0.2528396  
2.544379 5.33756 0.2729057 0.4859996 1.722686427 2.286252 1.236765  
0.455424805 0.4227454 0.688187 2.207809 0.8898157 0.6558545 2.390386644  
2.667626 0.3198071 1.204426 0.01931623 0.4753784 0.462050717 0.3451911  
0.4763513 0.3404726 2.264219437 0.310518196 1.941168 0.6101812  
1.708572 2.92480408 1.312663 2.247816 1.019329812 1.838818 2.014299 0.2604306  
1.763287 0.4826101 0.7394658 2.491681608 0.9783146 0.477633281  
0.4703156 4.424807 2.519085 0.5674188 2.471075 0.5707471 1.055794  
2.381698633 2.882323 4.375342 0.336171996 1.916032 0.310414 1.311612 0.9515177  
1.131442 0.6686849 1.049045 6.748853 1.671610175 0.6312725 0.804361104  
2.303651 3.02132 1.318156 1.679963145 1.390428107 3.494628 1.349466 3.03473  
0.2277691 1.368455 0.486026716 0.3593247 4.825437 0.527706 1.542779852  
0.7617156 0.3294522 0.539592636 0.2468799 0.509810014 0.306329  
1.626845 1.047955985 1.980529 0.9824903 4.42754861 2.199123738 0.3796  
0.3114686 1.765503 2.100491 1.251021 4.728382 1.79324 4.689363 0.7423358  
2.721703711 0.2116582 0.465220859 1.140608 0.346672007 1.136054 0.5906971

0.876514957 0.9302845 0.4889838 0.5259876 1.004468533 0.5859984  
0.3554576 0.35906073 1.864419711 0.8713131 0.4949491 0.5885971  
1.678703332 3.1717936 2.065121271 0.7375592 0.6921569 0.0919085  
0.3621102 0.5857733 0.5090595 0.510477 0.4962099 1.525179 0.3715583  
0.5317455 0.761215268 1.244723 0.5058855 1.728125 0.6237951 4.884204  
1.319816 0.4934825 0.8828296 0.6206939 0.659502 1.765563478 4.037474  
0.8634695 3.084037 0.5434159 2.653883006 0.4780467 4.03616 2.844102  
0.2813052 3.781186 0.3653029 0.4590651 0.558357765 0.4148518  
0.3763621 0.420642322 0.664078 1.596256 3.137616 0.5615302 1.156859  
0.552377816 1.138300253 1.265183 2.523822 2.292245 0.5307269 1.946597653  
0.5311609 0.3688554 0.6305778 1.239687 1.352426 2.407763 0.4368901  
0.7289635 3.937664222 1.413505142 0.7438459 2.387803451 4.933549  
0.257347464 1.43173 1.865111 0.7581267 4.478576 1.368805 0.6527751  
1.414929 0.574407 0.3000413 1.892321315 3.140428 0.1266879 0.5576787  
0.7288893 1.707893038 0.6207787 0.525072 3.784841 1.287341128 0.9843081  
0.2686833 0.5879778 0.4351762 1.542125 0.5010093 1.052737 2.277406241  
2.424824553 4.034287979 0.3299692 0.906746104 0.55506597 1.52263  
0.2386012 2.211085351 1.162219 0.6579809 0.4054962 2.380095307  
0.3055041 0.217479 0.4488944 0.611716825 0.6299421 0.4359571  
0.5840293 1.457187 0.4134759 2.6185 0.6960952 0.4925105 3.117559  
2.19115 2.576067 0.518499814 1.972718 1.376603 0.7157304 1.016206 0.3112941  
0.4865715 0.394597 0.262577073 0.614723447 0.524053781 0.5884632  
1.433033 0.5873728 1.698274 2.297097 1.990968569 0.9094215 3.001196  
0.5089114 0.4035462 1.500788 0.332599295 1.089948 4.765629 0.7322553  
1.150613 2.91185 3.727749 4.86832 1.373618738 0.7345284 4.222778 0.445588871  
0.4199545 0.9853444 2.411873 1.991602 0.7719823 1.991491202 3.004170739  
0.62873809 0.1382608 2.910939 0.6717406 0.385711 1.000885 0.5185066  
1.36360133 0.9700253 0.373066512 0.2183078 1.275223 1.603479 1.026654  
0.2672898 1.71181086 0.8576446 0.8548166 1.065261 1.80976 0.8099576  
2.785971 1.797399 2.083244526 2.767008 0.743100996 0.1529433 0.1801939  
1.768874241 4.294487 0.8390124 0.6027469 1.337830718 0.8291999  
2.138428 1.948996 0.933482244 0.3603023 0.4013338 0.1328472 0.2626205  
0.9840407 1.55062 0.5724084  
LINC00174 1.334465 1.667256898 0.6530689 2.292544596 2.905781819 1.130262593  
1.907321 1.353389935 0.2439798 0.6146716 0.642329612 1.867948 0.770626  
4.418654 3.270249 3.567544 2.111413 1.118693308 1.219879 0.8204248 0.591854034  
1.304769 6.446432443 3.656359 1.807762 1.619329166 1.286264 0.6236909  
1.155537 3.547314 1.624411 1.108851811 2.143356 2.347839936 1.264378 2.689175252  
2.314137421 2.186800006 1.581207 4.458497 1.552414107 3.071442 0.288405502  
2.707488 1.588698234 1.42235 7.029212 3.291028 0.59421882 0.4959636  
1.827457 8.692493 1.827360355 1.676078 1.118566106 2.864164 0.6658906  
3.139342 0.2821356 1.15696 0.5291386 2.965945 4.179350952 0.612814  
0.5138447 2.103376 0.4156516 1.975939 3.935899 0.4416126 1.278999  
2.699271483 0.4675776 0.523756 1.520811844 0.9677658 0.585108469

3.641645 0.5991195 3.001652 0.8425229 0.3753364 1.829518 0.669922515  
4.658419761 1.116102 1.35952 1.443109 1.369321023 0.7521946 0.6206528  
0.6391482 2.108660628 2.026189 2.220221 1.995926474 0.318276 5.064740175  
0.634281176 0.6607533 0.939628615 0.5020771 1.845202 1.216999803  
3.087345 0.9651761 0.599030868 1.888063 3.184411461 1.219101104 0.5478796  
4.118973961 0.9374994 3.603278 4.463875 0.8662553 1.07098 1.983595353  
2.798747 2.529097 0.5245204 0.517395 0.9562651 2.488442 3.836273 0.3086664  
1.7646 2.50018 5.161285 4.678960712 3.644245421 1.242126 4.677176814  
1.504919081 0.7441689 2.45349119 1.403825 0.356752 0.677001754 6.417375596  
0.540292239 2.089753328 2.85659 1.94383 3.652188 3.959283 4.635441 2.163474  
2.121616516 1.046837 2.345221 2.118695707 2.880279 1.109148 0.720646419  
1.585334 0.868084 0.655713608 2.36144 1.430935 1.195318844 4.469877 4.541415  
1.171054 2.148427726 2.064887 3.349086 0.685588456 0.3581161 2.909984246  
2.579337 1.075004 1.014199531 0.7929459 4.83485584 3.118612 7.897458  
0.7292445 0.82772 0.7154924 2.336755994 0.519439 0.4800828 4.021996  
2.923082 1.05067 0.2734181 2.257573 2.729396 1.96428591 0.165255281  
8.521918 1.581875 1.564596 1.443645 2.299399345 2.075661 2.280629653 1.111969  
6.822477 0.370538625 1.371134251 0.5335888 0.7915175 1.54416898  
1.633945 0.7191809 0.8418774 2.259597 1.842682 3.687191 1.163623 0.5892587  
0.8700185 2.052455 4.944594 0.3436998 0.3157285 2.047483771 3.965193  
1.601743 0.6348026 0.7167134 1.036872 1.987995 1.266968 0.7685631  
3.343912071 7.19994 1.304083 2.867523 0.03856724 1.767531 1.200816033  
0.4694124 2.399351 0.7503897 2.259014276 0.717414574 4.135563 0.4995038  
2.109392 1.519930333 2.863326 1.571978 1.002169306 2.002302 2.703728 0.2224367  
3.10066 0.5867836 1.081488 3.169107671 1.138158 0.495088354 0.9615803  
6.509565 2.331209 0.8868043 2.386698 0.8831645 1.560677 0.642412111 3.72867  
4.923445 0.222841349 2.263806 0.1748664 1.623653 1.344214 1.392252 0.5117929  
0.7148062 5.049436 2.608051214 0.3404753 0.910947791 2.732116 2.446417  
1.030414 2.321496684 2.424514226 1.728191 3.021418 2.630734 0.669751 0.9935601  
0.605537291 0.4947096 3.009061 0.4551682 2.852016724 0.3925637  
0.2411904 1.012721499 0.1681748 1.74217263 0.3767602 2.781715  
2.293105229 2.717634 1.261395 3.90611158 2.283997741 0.4709921 0.6371153  
2.383047 1.564716 2.249317 5.417352 2.715156 4.759687 0.7336717 1.716718672  
0.299072 0.496322044 1.578973 0.904243611 1.155593 0.5443383 2.076750082  
1.721806 0.3965347 0.6153799 1.112987357 0.7283775 0.4169576  
0.334557563 1.801995853 1.032587 0.785819 1.214679 2.742624396 3.399630631  
5.385792729 0.7152764 0.9796291 0.178919 0.2711241 0.718214 0.7825188  
0.8318235 0.7529656 1.773097 0.9087809 0.8721071 0.704662472  
1.162181 2.187508 2.147603 0.8761336 7.415992 0.984951 0.8401912 0.4940841  
3.660868 2.222463 2.752986309 2.202318 0.8554648 1.57109 0.9898218  
3.86246224 1.423042 6.322456 3.038631 0.3102506 3.120877 0.3880261  
0.710607 1.875887603 0.5059363 0.3686819 0.633497653 1.230153 1.543984  
2.459937 0.8435427 1.281719 0.87117208 2.536064155 1.685019 4.518225  
1.599149 0.729989212 2.104546664 2.353557022 1.238995 1.001498 1.303202

1.623366 1.882591 1.182124 0.9131132 3.438028198 5.095146584 0.5393549  
2.46962448 8.071251 0.986545872 2.966618 5.322108 1.077245 2.833867 2.022956  
0.9889511 3.569467 0.5915458 1.104534 1.965354443 5.848851 0.2259669  
0.7738647 1.68453 5.725565244 0.9286711 1.46772 2.12823 1.660060554  
1.388303 0.7919161 0.531376 0.4247873 2.279802 0.6194332 1.346037  
6.836484779 6.460994637 3.500728045 0.4934173 0.625710194 0.48277528  
2.598264 0.4308284 2.331626933 1.979104 0.5971545 0.861028 2.536786229  
0.9380087 0.7539701 0.4731146 0.758728694 1.13938 1.117067 0.4410849  
1.005696 1.296298 2.500803 0.833904 0.6040628 6.501585 2.088212 2.211898  
0.627150766 1.460286 1.608715 0.8262987 1.17585 0.6167561 0.7206317  
0.2697829 0.299269385 0.658194683 0.396671442 0.5100957 2.29693  
0.511524 1.789737 2.246505 2.578704349 0.5463386 3.35886 0.7620783  
0.3776859 1.506353 0.375255386 1.681739 6.145912 1.023427 1.802976 2.225027  
9.407938 3.404924 2.033180315 1.051047 1.648109 0.841419716 0.4292275  
2.232438 2.083028 3.086559 1.456033 2.170569062 2.613142381 1.160119506  
0.2392475 3.697762 1.430627 0.6871837 2.068333 0.8282099 2.258155107  
1.218751 0.696557228 0.2145863 1.64811 0.9104969 2.860767 0.3678965  
2.358129906 1.243461 0.756504 1.833134 1.640461 0.6407695 4.043614 3.032659  
1.578397224 2.43983 1.160180878 1.07809 0.2358553 1.668888396 6.693084  
1.386139 1.207681 2.371511455 0.558765 5.093424 2.594273 0.965515991 1.185028  
0.5342084 0.2700685 0.5952129 1.877436 3.2756 1.154546  
HID1-AS1 0.05819079 2.140518458 0.6412772 2.154920343 0.551922239 1.05049347  
0.5064887 0.737175902 0.1175239 1.066766 0.136157147 0.05285599  
0.9910975 0.3325089 0.1352022 0.8334591 0.3676897 0.42801848  
0.4636187 0.389161 1.001151962 1.033444 0.201393973 0.7751301 0.1603596  
0.479585004 1.474601 0.06240791 0.08332293 0.2027832 0.459477 0.634780657  
0.3059508 0.326211019 0.4718724 0.796151671 0.848862904 0.25361105  
0.9231389 0.6863046 0.432335764 0.621024 0.583291504 0 1.104775296  
0.6563089 0.2376096 0.2155809 0.632568987 0.5966546 1.636201  
0.03719587 0.765347284 0.6527873 0.712530368 1.038059 0.3143593  
0.317291 0.4228102 0.1755603 0.0301928 1.194691 0.124109547 0.7303595  
0.4360345 0.1949305 0.2365204 0.7146053 1.259878 0.04801612  
0.9673082 3.142529322 0.5478316 0.1878528 0.719187179 1.235492  
0.076801543 0.05714315 0.6683424 0 0.8605068 0.6170079 0.796583  
0.432274983 0.232644498 0.07530191 0.2715812 0.07312769 0.332756366  
1.991724 0.06721835 0.8128966 0.56235762 0.215664 0.9877916 0.058807102  
0.176808 0.576086617 1.325832227 1.041334 0.405467041 0.2971276 0.0722485  
0.323174039 0.5689307 0.2647891 0.228361777 0.6199928 0.302561208  
0.455922622 0.5166645 0.177741307 1.580309 0.2027554 0.1595233  
0.1969015 1.22269 0.408409337 0.8932223 0.8638762 0.4420541 0.72903  
0.9407473 0.1306535 0.5690156 0.2663905 0.01657594 1.009372  
0.2481548 1.373286184 1.374275824 0.4732895 0.580106696 0.734881261  
1.435086 0.561091702 0.5661459 0.3923555 0.132916194 0.195064249  
0.060655882 0.403453688 0.3494616 0.2991258 0.3341003 0.05601651

1.2717 0.724489 1.145674373 0.5900138 0.5455821 0.371416578 0.05547084  
1.851519 0.273382148 0.4857007 2.068047 0.520632582 0.9949339 0.3293198  
0.138995087 0.6614496 0.2303652 0.544694 0.272887369 0.3037625  
0.4330164 1.320100882 0.6860224 0.124174216 0.1108873 0.1009815  
0.713200504 0.290052 0.857185911 0.7658375 0.6010255 0.9464133  
0.8008032 0.07935695 0.300760481 1.067849 0.1339246 4.18911 1.19655  
0.02913306 0.3708098 2.713799 1.288161 2.132018782 0.267035795 0.6881618  
0.3269979 0.1489991 0.2782762 1.139406474 0.1430237 1.119463557  
0.5767966 0.03253065 0.337644682 2.042701766 0.7989515 0.02212498  
0.956792071 0.1431024 0.572935 0 0.3196911 0.04554565 0.986723  
0.1912857 1.098769 0.01483176 0.4223072 0.3362168 0.2315126  
0.3199827 0.579668463 0.4429362 0.7065413 0.142146943 0.1022397  
0.3498696 2.196113 0.09912207 0.5745769 0.500538833 0.5253422  
0.4747754 0.6037578 0.1065118 0.2621289 0.605624276 0.1028877  
0.02984834 0.3249352 1.183608062 0.122302259 0.3760799 1.83371  
0.2468451 1.546491079 0.4750047 0.401383 0.620214858 0.9156766  
0.6766909 0.5385162 0.1041746 0.71494 0.509687 0.892169321 1.01944  
0.420274892 0.2334035 0.6380459 1.433148 0.5529363 0.8054647 0.51444  
0.9447604 0.086628953 0.4427143 0.3605806 0.463422378 0.4175257  
1.207329 0.4892488 0.6929701 0.04621404 0.1536334 2.042957 1.561295  
0.478501144 0.6780987 1.999536701 0.4763469 1.207753 0.726846 0.223461678  
0.408905287 0.7018789 0.4362028 0.7147619 0 0.7431484 0.455600848  
0.990678 0.2892173 0.2521852 0.862603831 1.292364 0.3892792 0.413246303  
1.000973 0.621696351 0.2195872 1.007711 0.446310388 0.1649122 0.8976771  
3.97437078 0.77118448 0.1121334 0.6659586 0.6436482 0.7011731  
0.3360695 0.5559646 0.5768073 0.2881077 0.6907481 1.641475371  
0.2917767 0.612603986 0.3028248 0.223696436 0.3386124 1.023085  
0.537022252 0.02035592 0.4355579 0.3307421 0.174645283 0.3185749  
0.5104251 0.384980656 1.309632634 0.1743574 0.1315279 0.2229794  
0.267016026 0.474017743 0.327511035 0.5487199 0.9179236 0.158373  
0.4714467 1.41029 1.011127 0.2951028 0.2736156 0.4747584 0.2080826  
1.186804 0.794966865 0.4310435 0.1793256 1.50385 1.976825 0.7829082  
0.4772205 0.692648 1.456718 0.3935961 0.2660903 0.358233125 0.5737906  
0.301346 1.539612 0.604548 0.667264646 0 0.371705 0.3200549 0.2585246  
2.15087 0.7050122 1.450541 0.123153855 0.1545634 1.637543 0.745543355  
0.3305791 0.9290929 1.902222 0.1843059 0.6566666 0.753776472  
0.248772173 0.2576495 0.8860779 0.1248982 0.406456491 2.249869922  
0.056324613 0.2392835 0.4346345 1.132432 0.3750775 1.444218 0.1869099  
0.5712042 0.511672595 0.139182562 0.2968298 1.437733484 0.4217695  
0.106428175 0.2412275 0.4553001 1.201863 0.6143125 0.6519645  
0.5907533 0.598572 0.8890789 0.0517019 0.251708675 0.9114036  
0.4424284 0.1537551 0.1758389 0.366549822 0.7024901 0.02680838  
5.203813 1.211946049 1.095954 0.1940124 0.3128414 0.4221536 1.33884  
0.2656366 0.5581641 0.5575888 0.493021768 1.528317441 0.4451936

2.741172231 0.419273295 0.5997109 0.3146175 0.539331864 0.1964322  
0.5277351 0.550115 0.286344182 0.2058935 0.1362731 0.7709805  
0.562179021 0.02554096 0.3205221 0.6125765 0.2322281 0.3638221  
0.06016124 0.5604664 0.01616522 1.052922 0.2702099 1.569835 0.745843103  
0.1785905 0.1395357 0.7619705 0.4632792 0.1155343 0.8999966  
1.68134 0.497708399 0.409738271 1.056677841 1.028855 0.9877379 2.187939  
1.830648 1.715248 0.310259711 2.174495 0.7281526 0.6734864 0.3129186  
0.2236625 1.586546247 0.07112539 0.400711 0.3859601 0.3614016  
0.356389 0.2215737 0.2101327 0.530199979 0.3562738 1.185316 2.165514651  
0.4686486 0.657715 1.515506 0.4510984 0.1330249 1.442641689 1.476575305  
0.059774677 0.1482416 0.8814264 0.506537 0.08180205 0.3449368  
0.2042216 0.66344544 1.239362 0 0.1851959 1.425349 0.3322049  
0.1555242 0.2665501 0.624280034 1.200476 2.29308 0.9930807 1.271117  
0.02106696 0.8219602 1.167001 1.532754947 1.548994 0.338894364 0.01833362  
0.1656015 0.309098279 1.724292 0.8844602 0.408163 0.657510432 0.7461739  
0.7629813 1.187166 0.316433863 0.2528587 1.198708 0.133188 0.03913834  
0.4405815 0.1850712 0.1449332  
GATA2-AS1 5.920396 1.375444844 1.108866 1.740031991 0.768412105 1.142893424  
0.9266491 0.817935285 0.7691644 0.8527079 0.236087513 0.2075576  
0.8627958 1.00896 0.1930614 1.228117 0.8956581 0.520898132 0.834424  
1.204018 0.948197864 1.768058 0.474506429 0.5031108 0.2289848 1.102134341  
1.188864 0.3341816 0.08923547 0.8043427 3.243262 1.277245514 0.948492  
0.904749486 0.8633167 0.927721757 1.39394964 0.682035617 0.7737215  
0.7782398 0.778120736 1.727933 1.773520869 7.26981 0.767651535 1.058659  
0.5089403 0.3078378 1.064573112 0.7223397 2.228016 0.3585173  
1.788339848 1.281699 1.337460567 0.7411461 0.2945827 1.373382 0.8678906  
0.449154 0.1832331 1.039566 0.177221692 0.7462227 0.6155582 0.626288  
0.7317663 0.7247283 1.639892 0.3942454 0.4567081 2.994825835  
1.641378 0.3772175 0.860079192 1.435675 0.153535805 0.2311924 1.437983  
7.245869 0.7249666 1.123343 1.306745 0.941329425 0.269915512 0.412187  
0.6241208 0.09789597 0.656836083 2.618142 0.3059495 0.7402884  
0.803016137 0.5697194 1.155837 0.237924483 0.8025011 1.316192638  
0.853381638 1.699393 1.310334275 0.9634737 0.1461532 0.894107764  
0.9613425 0.3938588 0.652176428 0.4767086 1.242117794 0.964029251  
0.9419727 0.535810414 1.939745 1.027809 0.3189069 0.9752896 0.6789747  
0.952537707 1.031007 0.707785 0.6676463 0.9239011 1.758549 0.30317  
0.7142343 11.71816 0.1183477 1.6673 0.4960922 0.805401712 2.113745876  
1.358422 1.272125596 1.260702091 1.359825 1.173198125 0.9296895 1.081618  
0.411227061 0.457603323 0.335626555 0.720137441 4.592472 0.7190112  
0.7532796 0.5599197 1.505699 1.361625 1.583376324 0.8951644 1.349446  
0.356974894 0.1881222 2.247288 0.787255964 0.91029 1.367157 0.622222813  
1.741517 0.4310632 0.496193587 0.9782467 0.5847982 1.355062 0.45229361  
0.8096786 0.8501953 1.218538775 0.5255161 1.347586674 0.4433549  
0.450613 0.771523927 0.9254302 1.547504582 1.030484 0.5363949 1.567655

1.702261 0.4320227 0.567513441 1.395363 0.4482117 3.322377 1.385872  
2.100822 0.4211902 2.484075 1.27573 1.867518196 1.741905338 1.10549  
1.268507 0.3191439 0.6953859 1.307031815 0.2348646 1.083216547  
0.674528 0.174195 0.880829526 2.775728439 1.655831 0.3159327 1.707808887  
0.2469137 0.6476784 2.244247 1.221142 0.4389979 1.57102 0.509044  
1.346357 0.1800211 0.7956669 1.107921 0.3374747 0.771049 1.835702799  
0.6324888 0.9102056 0.2368078 0.3941803 6.273757 2.190038 0.2653892  
0.87476 0.506275772 0.8283018 0.9079734 0.5927167 6.84419 0.5614588  
0.879708893 0.4040245 0.11721 0.7668721 1.465231958 0.829544668  
0.862333 1.729611 0.5801256 1.86917267 1.017421 0.819609 1.058608351  
2.208461 0.5914287 0.5980892 0.1177649 1.035075 1.119001 1.043062391  
1.994012 1.320285382 0.9396857 1.075092 1.24952 1.184344 1.066294 0.7345924  
0.9479927 0.216477519 1.090497 1.193608 0.575715527 1.373861 1.249355  
0.8732758 0.7333077 0.305209 0.9597884 1.384865 1.317995 1.465442159  
1.46857 1.875366849 0.8049003 1.287114 1.179428 0.522149137 0.784608288  
6.059026 0.4396757 1.230773 1.039368 2.217585 1.109801451 1.530761 1.066882  
0.6717376 1.019380485 2.012027 1.104019 0.991356703 1.357868 1.341272374  
0.5788773 1.368419 0.863718688 0.7718698 0.9445094 0.2026852  
1.072729994 0.4536744 1.557811 2.096685 1.474044 0.8966346 1.307176  
1.005049 0.2378419 0.9498192 2.313496925 1.097689 1.578677855 5.421849  
0.537217062 0.8914901 1.006239 0.760448286 0.05086751 1.517862 0.3632936  
0.489861387 0.4874011 0.6049533 0.791875088 1.566195575 4.633664  
0.5223596 1.043653 0.881720132 0.939451087 0.872380634 0.8065876  
1.198642 0.3279147 0.9108003 0.7470613 0.9859022 0.4862201  
0.7325779 0.6537174 1.017101 1.495316 1.396258491 1.071218 0.4125527  
1.490147 1.608995 1.714191 1.000872 1.183344 1.843139 0.3421075 0.5541119  
0.609331369 1.106112 0.570155 1.598897 0.8163453 1.223877872 0.4170416  
0.3317341 1.022585 0.4218962 2.317329 0.6184132 1.253945 0.835320826  
0.5572881 1.290708 1.366230786 0.6899178 0.7680861 1.87552 0.4342451  
0.8930326 1.620019383 0.403052999 0.502338 0.5954217 6.161916 0.735170537  
2.116695542 0.090482049 0.6264203 0.8110563 1.396545 1.15782 2.686372  
1.794142 1.298996 0.730640675 0.273274565 0.6839509 1.494731948 1.919716  
0.265953894 0.7202339 0.4589251 1.455035 1.140366 0.854881 4.311003  
0.5010476 1.299312 0.2030256 0.473789235 0.9635623 0.6400764  
0.3842194 0.6904933 1.177679783 0.9484022 0.124413 2.864754 1.297944848  
1.018468 0.3337063 0.5584007 2.41125 1.705111 0.9103551 0.5878082  
1.003912571 0.591366978 1.192212069 0.8430097 2.559916269 1.773647248  
1.03321 0.8780928 0.956836391 0.4338901 0.5769575 1.121287 0.485549678  
0.5078265 0.4183697 1.310962 1.094674238 0.2097088 0.4719908  
1.187128 0.3813504 0.4242732 0.09664536 2.146301 0.686721 0.9742166  
0.2962739 1.887982 1.434823248 3.309433 0.1195497 1.234521 1.126189  
0.3240615 0.9517357 1.047435 0.619170943 1.070437767 2.224826045  
1.024167 1.116595 1.568279 0.9551394 2.334144 0.979786766 3.041692 0.9373616  
1.106959 0.7074819 0.4191835 1.402948405 0.1967787 0.6851265



0.5882254 0.8314331 7.305454 0.3103106 0.7688989 0.712031488  
0.9639277 2.632881 2.081313569 0.9398391 0.7962624 1.363578 0.4942139  
0.2645764 1.398964714 1.235431252 0.394766838 5.465904 1.656091 0.9945476  
0.3329053 0.8701734 0.3888232 0.860522348 1.257448 0.377107613  
0.9668942 1.509529 11.53085 0.5829604 0.4813712 1.301499453 1.454485  
2.607388 1.131435 2.539766 0.1880155 1.295133 1.720754 1.376951088 1.72803  
0.929351636 0.2094353 0.4039695 1.029876291 1.058744 0.680056 0.8118053  
0.492344329 1.297865 1.015212 0.8996502 0.722960592 0.2901443 1.127411  
2.389203 0.2235497 0.811242 0.9381645 0.4714014  
AC087286.2 0.1676659 0.264321597 1.039343 0.411821447 0.034077017 0.947162102  
0.2345388 0.762684241 0.4353725 0.1145473 0.144114383 0.1522946  
1.803576 1.129145 0.2146554 0.2846712 0.3739162 0.048048907 0.40552  
1.975614 0.731670582 0.8186601 0 0.6091071 0.09900989 0.814295372  
1.002523 0.1926608 0.2315052 0.1391147 0.3352726 0.498818684  
0.3380342 0.123944979 0.339903 0.779081524 0.395993116 0.334049303  
0.5699683 0.2991114 0.845292841 0.4059903 0.273208377 0.04046168  
0.755198806 0.3902129 0.1467059 0.1597259 1.048941777 0.8008457  
1.20811 0.1377938 0.143195141 0.4763279 0.283828079 0.1281846  
0.09704652 0.4162942 0.6339865 0 0.3355518 0.1613569 0.268198851  
0.4042925 0.2936927 0.7522177 0.5646626 0.3008281 1.340346  
0.1185853 0.7321001 0.96170092 0.5798477 0.550928 0.19981962  
0.8562292 0.018967654 0.3292946 1.382938 0.2027841 0.5525497  
0.9904846 0.4215683 0.587173519 0.179550441 0.2479639 0.0419202  
0.0225754 0.338391278 1.379146 0.06225335 0.1638864 0.591548461  
1.686645 0.6776516 0.121029767 3.087826 0.426827811 0.744182689 0.1530821  
0.55339461 0.2140294 0.1486932 0.498838716 0.3746897 0.2997266  
0.689314252 0.2159377 0.871773582 0.7362247 0.683574 0.219483584  
0.5613737 0.1752606 0.2363846 0.2735364 0.7669012 0.537945228  
0.07353295 0.2623171 0.16796 0.2925785 0.4435507 0.02016716  
0.3173249 1.133056 0.02046878 0.5492707 0.06128672 0.242257195  
0.776297489 0.5610632 0.170558065 0.983089263 0.4375589 0.593882776  
0.1677851 0.4306664 0.300907494 0.172053423 0.131076441 0.687996242  
0.2697076 0.714125 0.303994 0 0.4972796 0.2894405 0.444630768  
0.3415208 0.9624446 0.635044429 0.06849808 2.085147 0.495125445  
0.3427239 0.7566593 0.307475039 0.2377921 0.03388834 0.236002075  
0.5134109 0.1896441 0.5254801 0.385113776 0.1250336 0.08020644  
0.698624817 0.2294321 0.184003611 0.136929 0.1558711 0.160126284  
0.313399 0.33266977 0.2546097 0.6390955 0.2103619 0.471961 0.3184799  
0.159168696 1.194232 0.4341134 0.8532644 0.5581888 0 0.291387  
1.059759 0.4618114 1.121343773 0.539588858 0.8497756 0.1076781  
0.09199564 0.031239 1.106835562 0.2119351 0.782129194 0.2210451  
0.3213634 0.288650786 0.623826077 0.4384818 0.6010619 0.112523166  
0.2945162 0.1179147 0.2036211 0.8092787 0.2812099 0.6579648  
0.36505 1.100119 0.0915749 0.4345712 0.2554934 0.02382359 0.5926953

0.692712312 0.2945164 0.3034683 0.058509979 0.07575031 0.2658682  
0.3242449 0.03060018 0.208681 0.128768671 0.2973291 0.4815836  
0.03106456 0 0.0359655 0.180516536 0 0.03685817 0.31208 0.518623963  
0.604099036 0.7501874 1.474947 0.5080271 1.282215168 0.6144902  
0.09912944 0.263268286 0.3861001 0.4033983 0.467953 0.04287993  
0.6376085 0.8811407 0.826270451 0.9703663 0.069196775 0.3042301  
0.1890936 0.9869596 0.2664556 0.1657711 0.4857836 0.2207149  
0.064184179 0.4373481 0.2833488 0.091561027 0.8294128 0.6605115  
0.2626731 0.6876266 0.02853367 3.604566 0.9353987 0.1587734  
0.093296276 0.7536142 0.852970408 0.3137153 0.6360349 0.9519413  
0.426454759 0.504936074 10.00661 0.09505489 0.5191898 0 0.8000249  
0.297846009 0.8764207 16.54747 0.4311837 0.367305184 1.086081 0.400584  
0.57153216 0.7416297 0.867835683 0.2920151 0.7563818 0.464105858  
0.06788054 0.8945751 0 0.689593646 0.1384677 0.497743 0.3228907  
0.7375696 0.3276275 0.3314292 0.1865468 0.08894234 0.4106889  
0.394864943 0.4711615 0.638274181 0.08629448 0.4520147 1.071471  
0.2578276 0.265256446 0.05027295 0.4610126 0.3455831 0.123234551  
0.7024853 0.554662 0.384841774 0.404299468 0.1196139 0.1218128  
0.5200976 0.329724335 0.302762116 0.155548656 0.7174439 0.5070906  
1.095173 1.284188 0.589861 0.708155 0.1401566 0.09653538 0.5862547  
0.7115552 0.6250024 0.628264722 0.388969 0.02460443 1.579341 1.025253  
22.36468 3.388446 1.191332 0.7514084 0.2958453 0.6571623 0.07806417  
0.4605539 0.1860583 0.4536926 0.8601269 0.767145169 0 0.4303118  
0.4347413 0.889308 0.3828467 0.2238643 0.9307204 0.887112049  
0.1717762 1.962055 0.286419181 0.4082151 0.3623018 1.565971 0.3869028  
0.6178162 1.139754777 0.189043656 0.6363163 0.3218153 0.2467685  
0.836520303 0.520921587 0.069552363 0.1723626 0.3415413 0.6610535  
0.1362247 0.4380258 0.4616107 0.2089928 0.54942446 1.031216251  
0.6331143 0.840970902 18.35895 0.087615114 0.4874389 0.5622267  
1.010922 0.5689372 0.5573612 0.2884034 0.3823167 0.03430868  
0.06384401 0.310822076 0.4328636 0.8338752 0.3797285 0.744461  
0.591905336 0.4416205 0.03310429 1.116081 0.256554813 0.665928 0.04355926  
0.1755962 0.4389859 0.424487 0.6068387 0 0.029936421 0.121761437  
0.244642284 0.3824324 0.81238377 0.465965094 0.4829688 1.977844  
0.706356355 0.2880448 0.6109434 0.3506109 0.324125706 0.115567  
0.1346213 0.8518289 0.126219257 0.03153921 0.1484236 0.3890259  
0.2867665 0.3893632 0 0.3145869 0.698656 0.1592081 0.262168  
0.5457936 0.460501613 0.02004839 0.0344611 0.4825221 0.2179351  
0.366859 0.3774428 0.1017745 0.148992597 0.321977526 1.171690395  
0.6108079 0.4065689 0.6382141 0.1304177 1.82842 0.943073807  
1.315186 0.1089889 0.7623492 0.6440117 0.1841262 1.060454216  
0.02195727 0.1562581 0.256632 0.1735519 0.04632489 0.5893136  
0.06487052 0.592362674 0.509409 1.69137 0.4885343 0.4936056 0.1765605  
1.374921 0.4033725 0.140799 0.398830725 0.683755042 0 0 1.126619

0.6254964 0.2020263 0.08518893 0.1050761 0.464244271 0.2953451  
0.102982857 0.51455 0.3520179 0.2208892 0.3648928 0.1161702  
1.110083406 0.1347641 0.9700874 0.7305642 0.9605242 0.0260145  
0.3149988 0.4803566 0.353585078 0.4542834 0.627724789 0.4527848 0  
0.742174107 0.4258479 0.08401341 0.3960153 0.37625828 0.4312991  
0.5995604 1.311657 0.312598301 0.3122421 0.6831796 0.04111676  
0.4108043 0.1431714 0.6856048 0.01988561  
AL353622.1 0.2275773 1.734058398 0.2351212 0.956709188 2.254864827  
0.524025082 1.202639 1.669695992 0.3775467 0.2040651 0.41567182  
1.520821 0.2040035 2.455672 1.651026 2.296058 0.8700452 0.864139203  
0.3804395 0.6975663 0.522241958 0.6618111 7.493719578 3.476809  
2.038229 1.833734566 0.6803753 0.2484284 5.010193 0.3493246 0.2975486  
1.160673956 1.686848 3.396219877 0.7249933 1.447724022 1.683614463  
2.174970108 0.8240875 3.205643 0.845407209 1.423575 0.421401095 0.9610948  
0.727455786 0.7537273 5.164877 1.517601 0.355939112 0.2500121 1.441893  
1.246874 0.291543836 0.8827655 0.626026971 2.457585 1.177282 4.279401  
0.3922989 0.6743351 0.3289385 2.9254 6.812625088 0.4959918  
0.249148 0.7555437 0.7598244 2.04161 2.867002 0.1609589 1.516698  
0.950380668 0.295141 0.6395566 1.446509123 0.3645027 0.469851703  
1.899581 0.3784472 1.500081 0.5769156 0.1680514 1.255674 0.425663065  
3.082913383 0.6100294 0.284497 2.589265 1.181076278 0.1715956 0.1478717  
0.5908757 0.741832317 0.5663073 0.6285263 5.248647196 0.9525427  
5.986561796 0.858584038 0.8519079 0.375568579 0.3320088 0.8880312  
0.643232648 1.867429 0.4530571 0.552869014 0.3397271 2.535602928  
0.602517477 0.1005152 3.003934709 0.43541 3.440848 4.759291 0.5053509  
0.2602338 1.620058701 1.135318 2.462679 0.2351008 0.3360285 0.2508513  
1.943513 2.69196 0.3596766 1.104367 1.605778 3.951339 3.041604471 0.931167145  
0.1665882 6.239005258 0.692847564 0.2227163 3.649809141 1.41388  
0.1552724 0.334169762 6.433824978 0.266870287 1.47320603 0.4209935  
0.409446 0.6631378 1.244027 3.04625 2.232189 1.351037451 1.460199 1.902374  
0.897877727 0.6856851 0.9372019 0.22910689 1.475519 0.2567584  
0.663956383 1.896224 4.174277 0.502338607 2.08268 3.17471 0.7774404  
2.303257582 3.334828 2.44042 0.489935348 0.6288171 0.842916285 7.22056  
1.047262 0.679198891 0.6228849 3.335249625 6.344018 5.008889 0.8090009  
0.1296463 0.665048 2.997608913 0.4727809 0.9890707 0.7509934  
2.685181 0.1586966 0.26838 1.166302 1.697662 1.555117194 0.030516594 5.27691  
0.7764448 0.4578498 1.441652 2.673650976 1.450312 1.543030035 1.100111  
1.717518 0.223104549 0.809921058 0.2510844 0.4171895 0.544103019  
0.7095645 0.3280998 0.66504 0.5492277 0.260824 1.447109 0.7723847  
0.3608617 0.06836337 2.074323 2.14575 1.236867 0.1424602 1.386849226  
4.98266 0.4505217 0.407012863 0.4455442 0.208628 2.28055 1.775597  
0.4107099 1.651681643 5.191412 1.882843 3.331015 0.02231546 1.769613  
0.446286199 0.3664547 1.338264 0.1891047 1.551872218 0.153742428  
1.363727 0.4863975 1.103294 0.675787637 1.071014 3.040853 3.346011325

2.161764 5.651428 0.1504338 0.09457835 0.5325802 0.4057842 1.243016627  
0.5784578 0.610496999 0.4618403 6.149188 0.5889737 0.8081003  
2.981324 0.374064 1.33742 2.076333435 2.309569 0.6455733 0.403904172  
0.3651191 0.416246 1.738099 0.7985189 0.9779199 0.590113 0.5674912  
3.27879 1.519602065 0.2557251 0.350374531 1.383896 1.801037 0.5168381  
1.813125965 1.863330936 1.791358 0.8386333 1.902717 1.219989 0.2794583  
0.190907296 0.9603453 4.443587 0.7478285 1.34609324 0.1729889  
0.09968259 0.540258458 0.1174406 1.143957418 0.2123356 2.748791  
1.200829168 1.190091 0.9502673 6.66141324 2.172865766 0.5325134  
0.2790521 1.871068 1.022886 3.28335 2.369786 5.196456 0.9582451 0.7396785  
1.25950751 0.9780894 0.320869054 0.7125395 2.198487948 0.4079234  
1.207349 1.815199636 1.142967 0.1564361 0.2132132 0.55408028 0.1525603  
0.2053247 0.199724326 3.031934214 0.07305981 4.374613 1.910197 1.566402494  
1.219142877 5.911648653 0.2975517 0.3643875 0.7963435 0.2672696  
1.115169 0.6892798 0.7038817 0.3030069 1.193608 0.1073125 0.5046115  
1.50565498 1.06981 0.6178306 1.065951 0.3396175 3.783586 0.9498405  
0.4871811 0.3786017 3.692905 0.5203239 2.790242222 1.118007 0.5050837  
0.9383756 0.319403 2.776710535 0.2886881 4.185861 1.616031 0.0928524  
0.3734969 1.291392 0.303905 0.129010786 0.3173517 0.2513687 0.687279813  
0.2131081 0.3893114 0.7875861 0.5174306 1.395447 0.476997629  
0.849967493 0.6145479 3.374345 0.9577345 0.102188804 3.16213241  
2.076915795 1.002653 1.341079 1.665118 0.4160281 0.8281149 0.0957239  
0.1950241 3.710098129 4.257412081 0.5314357 1.638223808 4.90429  
0.460823967 0.7626937 2.783162 0.6349847 1.956325 1.297644 0.339647  
1.902738 0.605385 0.1408179 1.936845016 7.065135 0.6439784 0.3704549  
0.9578476 1.122409332 0.717167 0.8312665 0.3729833 1.182526425  
1.071537 1.478103 0.3575121 0.251373 2.57001 0.5008854 1.882764 9.152695206  
5.363012217 4.696269361 0.3893142 0.321612084 0.307449119 1.0598  
1.210458 2.307863098 2.654486 0.3040582 0.4089709 2.939628515 0.3764691  
0.5710158 0.1020185 0.31051884 0.3424721 5.859106 0.205347 0.9828202  
0.8130661 1.046172 0.5195131 0.101604 10.91291 2.21596 0.9132524  
0.390656895 0.2313037 0.1403249 0.3438435 2.218568 1.51459 1.00328  
0.4075166 0.259109234 0.358987796 0.397591599 0.3399169 1.667037  
0.1660341 0.3097839 0.8415881 1.110051207 0.3440107 1.950873  
0.3351201 0.3642225 0.2577293 0.170774205 0.6705717 5.505588  
0.3110119 1.766749 0.188634 3.763773 3.07076 0.856926223 0.3300028  
1.125796 0.209400171 0.3580949 1.881255 1.159905 0.9972469 1.799622  
1.533806592 2.484544349 1.114590279 0.07986427 1.671741 0.8224715  
0.1919509 1.474272 0.3066387 1.204662285 0.7015395 0.407695628  
0.1552027 1.343822 0.5782218 0.6973003 0.09855059 3.159980356  
0.1676757 0.9697504 0.8676623 0.2066913 0.909237 1.365805 1.226045  
1.326866369 0.4462316 0.271099652 0.1382798 0.2775634 0.841875646  
7.022877 3.0504 0.5375221 2.419130489 1.110956 3.245509 1.640712 0.645286468  
1.203331 0.7534295 0.2790444 0.1967984 4.207252 1.186502 0.3036518

AP001453.2 1.191595 0.324683146 0.3556497 0.420258454 4.520770094 0.204870107  
1.037156 0.353586794 0.3743571 0.7281527 3.345771106 5.123135 0.3085803  
0.3120752 0.21094 0.5083807 1.683026 1.248305762 0.6065419 0.9149593  
0.195247392 0.7985748 1.319687136 0.9860276 3.247259 0.613790482  
0.2714245 5.495189 0.3981217 0.3691084 0.7127945 0.288858869  
0.5056024 1.06194065 0.3489313 0.328112822 1.261840316 0.738601474  
0.328756 0.2480069 0.78694282 0.1496112 0.604078823 0.447315 0.942621301  
0.5309429 2.148983 34.55108 0.148038399 0.6020428 0.2302757 6.880456  
1.013159594 0.8911585 1.286497122 0.5668464 1.180164 0.4872968  
0.2886016 2.356733 1.154103 0.2293514 1.694292812 0.5157191 1.109342  
0.4989585 0.1722069 1.019893 0.1587632 2.294238 0.08519546 0.503614869  
1.095106 0.8655151 1.055440314 0.2065277 2.45340407 0.6760823  
0.2219336 1.793468 0.1409675 0.7159668 0.0776759 0.413086898  
0.87339109 7.333002 1.112255 1.09814 1.149024224 0.1778798 0.4358778  
0.4076571 0.597105941 0.3729265 2.597097 12.122438784 0.5517054  
3.617669557 1.343767067 0.4738623 1.194453071 0.9802638 2.695906  
0.992663977 0.9837959 1.626657 0.762055957 0.9114956 0.206522098  
0.550590745 1.612181 1.401949862 0.3841897 7.224308 4.834599 1.209608  
0.6358729 0.334526241 0.9755125 0.5799976 0.7891586 0.5225021  
0.5137079 0.7134514 3.758695 2.464843 6.720754 0.303617 0.8808041  
0.580281053 0.658632672 0.7753386 5.166452348 2.731014626 0.1209334  
0.401227336 0.8656248 2.082997 2.17742106 1.369510666 0.558933282  
0.629461126 0.8348738 1.87843 0.2640579 7.800087 0.6654946 0.9890428  
1.161849244 0.7551213 0.9842084 4.134348432 0.3407693 0.1415466  
0.845942972 1.77605 0.2875496 8.961584057 0.3943286 1.161399 2.134692136  
0.3869931 1.956797 0.5576955 1.250652149 0.4146842 3.33992 0.69511414  
0.3316876 0 0.8779972 1.102847 0.796608147 1.856096 0.334341478  
1.005279 0.4786224 1.317845 0.2484599 13.10852 1.378395575 0.7976551  
3.953663 0.5306104 0.3992955 1.193138 0.9664092 0.1899881 0.5389089  
0.404242348 0.729092707 2.818351 0.5059247 3.186717 0.3108202 0.352573461  
0.3124001 0.924990936 0.7874191 1.376695 1.134618387 0.269865771  
1.242181 1.902859 0.995179756 2.34429 1.121078 4.530313 1.309288 0.4352394  
0.4041102 0.735927 0.6891868 2.632203 2.081865 1.306354 0.8954795  
0.9555598 0.204216695 0.3721098 0.6709853 2.555033766 6.057487 1.8554  
0.2606994 1.251686 0.3229836 0.313186113 1.942351 0.9027719 0.6868546  
6.761361 2.186847 0.456150902 1.334351 3.667296 2.316516 0.703660653 0.33392409  
0.6911274 0.206695 2.330798 0.241280733 0.2161523 0.8328866 2.328402931  
0.4878221 0.3822583 0.2178253 2.962809 0.4337808 4.453145 0.395834755  
0.6378613 0.382494737 0.3894403 0.4529378 0.2257471 0.2393414  
0.6872422 1.259995 1.498897 2.814642883 0.8763445 0.22375 1.138761522  
1.090414 0.5633078 1.103491 0.2196105 13.05953 0.3146011 0.344703  
0.6018115 0.137522149 0.5245705 0.198522602 0.3034683 0.315207  
0.721644 0.91518225 1.221107968 0 3.01246 0.3730861 12.70336 0.4942513  
0.695140322 0.2220413 0.5922414 0.4237205 1.583657528 0.5390864

0.7380944 0.496449328 0.3006271 0.40590691 5.372826 0.242768 0.352743774  
0.250146 0.2794936 2.32527795 0.653455572 2.041065 0.8134406 0.7688469  
0.106357 1.014164 0.7851518 0.3749685 0.7620436 0.4191027 0.37832956  
0.5515222 1.045377404 2.385023 0.694048255 1.300106 0.4275533 1.759489991  
3.89047 1.557301 2.396506 6.198883673 0.7766169 0.362342 0.450479877  
0.134089271 0.449604 7.294483 0.3720474 3.82745333 0.557853146 1.547670042  
0.3084488 0.06595325 1.124263 0.700388 0.6210549 1.030112 0.4958305  
0.6936964 0.8795924 1.201817 0.1429567 0.217051255 0.860032 0.8976291  
0.03837374 0.08096042 0.2137588 0.3257409 1.148198 0.2265553  
0.2336179 4.540695 0.460277855 0.5091551 2.386034 0.1671899 0.7714801  
1.853255964 5.970342 1.712598 0.1747704 1.336082 0.7406832 0.2749868  
0.3106225 0.560415365 4.59988 0.08853494 1.176107478 0.6248673  
0.2670231 0.4018913 1.358677 0.3201623 0.945022805 8.09847824 1.19048  
0.8182841 1.398148 0.7028452 0.47991101 4.65196958 3.321043 0.8360773  
0.1405409 0.2409603 0.3113033 0.2551617 0.5776183 0.364442356  
1.662555514 1.031469 0.516509208 0.5038097 1.985649065 0.5987525  
1.352801 0.09511506 0.4612489 0.5648301 1.444148 1.239808 0.6827255  
1.376336 1.280774382 0.4785426 0.03178869 4.512854 3.943648 0.846828799  
0.5579699 3.549977 0.2430327 0.425442655 0.5462143 1.155743 1.824789  
0.5459749 0.1975925 0.3082408 1.104875 0.926675146 0.323065521  
0.540917613 2.24607 0.299370904 0.200331168 0.2847655 0.1561829  
1.539481617 2.07825 0.4052489 2.131855 2.573460382 0.3577349 0.1116207  
0.4431625 1.988428995 2.719663 2.105775 0.5256519 2.282603 0.4635634  
1.19088 0.3709701 1.522699 1.114723 1.212033 1.061134 0.650513166 0.3102966  
3.581183 0.2933928 0.7227998 3.83041 0.2781823 1.23766 0.432378014 0  
0.382712943 0.2971166 0.8989463 0.1175939 2.018525 0.1601085  
0.651621349 0.03029113 0.6626962 0.1340815 0.7594375 8.040486  
0.178834797 0.6796824 1.065277 0.7295496 1.04156 0.5633479 0.6980384  
0.5378711 0.413604195 0.07679533 0.6832165 0.79591941 0.31989  
0.4684621 0.3800032 1.231642 1.971658 0.293945593 0.251970032 2.448058373  
2.486301 0.971074 0.5402372 0.2903493 0.7848227 1.742469 2.868077229  
0.1187317 1.631855651 2.907452 0.6810397 1.011682 0.679409 3.531809  
1.738572839 0.4966183 0.2898536 0.4326744 0.2330969 8.512887  
2.398986 0.6695817 1.172694229 0.978013 0.189263755 0.4505095 7.460389  
0.586067134 0.9101874 1.238389 0.597008 0.459749604 0.4984864 0.5365771  
0.2558953 4.348624612 0.4191621 0.7867437 3.363723 3.205803 0.5381519  
0.8590158 0.9892844  
GARS-DT 0.576857 0.989225353 0.344217 1.179907863 1.276096367 0.769876855  
1.046275 0.666764176 0.2029779 0.3810513 0.499772239 2.436658 0.5084636  
1.729487 1.542266 1.371307 0.976362 0.54131126 0.6012298 0.6161174  
0.501040843 0.9210438 3.480699963 1.035942 1.336429 0.906309154 0.9972441  
0.3898015 0.5625749 1.027504 0.7159939 0.657396202 1.765825 1.081988665  
0.8100964 1.3471512 1.701734277 1.91587421 1.018442 1.452054 0.939123863  
1.459137 0.289804313 0.9058553 0.877959784 0.8885317 3.259152 1.216462

0.416911973 0.2909199 1.68693 2.851938 1.042827269 0.9677333 0.516340931  
1.447791 0.7900005 1.489875 0.3081388 0.7196138 0.4714626 1.159987  
4.272362398 0.5836373 0.3622401 1.23743 0.447111 1.212692 1.576598  
0.5751114 0.8416043 2.631979489 0.283296 0.2666667 1.322095586  
0.6098187 0.58600263 1.760929 0.3397538 1.269315 0.4971642 0.4488856  
1.763495 0.545369525 2.01762625 0.865849 0.3873306 0.71563 0.818997198  
0.4802539 0.4914125 0.3644358 1.326057688 1.023548 1.304195 0.889058898  
1.519374 2.054683847 0.444144043 0.3123635 0.411237723 0.3971836  
0.9845804 0.668072438 1.531125 0.6217711 0.431327925 1.597741 2.451736099  
0.774157513 0.2756918 1.729044494 0.5385528 2.1968 1.553458 0.390443  
0.6818709 1.552785401 1.447605 1.924915 0.40306 0.2496686 0.5669547  
1.411886 1.628522 1.568293 0.8200346 1.230071 3.054168 1.679080239 2.179146872  
0.6167664 2.159704034 2.055252416 0.3873153 1.572136449 0.8149247  
0.2235611 0.350632899 3.646228969 0.538150921 2.020213205 1.130129  
1.438061 1.376639 1.998892 1.476539 1.944223 1.593236052 0.810727 1.743967  
2.016711962 4.315155 0.7091226 0.516146447 1.551324 0.6449026 0.645878332  
0.9203119 1.14729 1.124670894 1.635806 2.453523 0.7677845 2.428027903  
1.392078 2.155253 0.39219121 0.3144705 0.833765111 1.67091 0.4882808  
0.639668421 0.8485782 1.73744447 1.545001 5.274945 0.3163901 0.47086  
0.7202641 1.119205793 0.5234029 0.3178448 3.201692 1.334317 0.7113212  
0.2027773 1.306351 1.385468 2.09403697 0.212796709 2.442203 0.7241369  
1.036408 0.525207 1.622298498 0.8598299 1.321492177 1.859929 1.538913  
0.353486709 1.091292601 0.3630864 0.6022397 1.16418481 0.6568231  
0.7455348 0.6758996 1.200349 1.744591 1.817414 0.9102757 0.2740118  
0.4674088 1.269746 2.763617 0.3067345 0.3023481 1.343134938 1.750885  
1.313675 0.591061619 0.5703785 0.7626563 1.094512 1.551315 0.461797  
2.586071894 2.718881 0.5867133 1.017765 0.1256842 0.793825 0.34018027  
0.4290347 1.924714 0.6009222 1.068412788 0.347228708 2.323339 0.4680707  
1.48705 0.983191408 1.588604 1.300247 0.84809875 0.9709246 1.994896  
0.2328746 1.47265 0.4665694 0.5833436 1.799985112 0.8991909  
0.37188182 0.6230813 2.957238 1.898473 0.4661668 0.9921365 0.5117289  
0.7811211 0.894022866 2.121824 2.416225 0.253930844 1.049464 0.2418938  
1.342223 0.5643139 0.7937988 2.179997 0.752718 2.022083 1.034973186  
0.3120415 0.579945984 2.593223 1.960923 0.5620158 2.09434231 0.911506907  
5.597693 1.029896 1.827847 0.4659793 0.6106465 0.450822001 0.4932609  
11.64448 0.3855275 1.3881305 0.3286952 0.3123735 0.818927671  
0.2223759 0.869100178 0.3201076 2.809104 1.217103214 0.9591654  
0.7534013 1.27948508 2.12718545 0.2387687 0.3451817 0.9336787  
1.627584 1.37722 2.790846 1.588389 1.639769 0.4494199 1.43289636 0.3170162  
0.451796273 0.5712383 0.433742533 1.190428 0.2978742 1.067263034  
1.253376 0.3091484 0.4920778 0.558700859 0.3795531 0.3528679  
0.273249932 1.078272756 0.3265749 0.6330657 1.013338 1.546969232  
1.446138997 3.673752418 0.2726277 0.3189018 0.4912287 0.3385581  
0.3850581 0.4948735 0.5711726 0.4654001 1.465828 0.5078332

0.5308135 0.54844925 0.6354226 0.5338728 1.101813 0.4412757  
9.713448 2.299059 0.7492888 0.517626 1.190945 1.300017 2.342231044 1.632105  
0.3561236 1.580184 0.5704145 3.061305816 0.6612179 7.996436 1.469204  
0.3322561 1.649041 0.281654 0.4072812 0.960070952 0.3280191 0.420035  
0.384529176 0.5892999 1.364015 1.615359 0.5232635 0.8916669 0.435106908  
1.066905103 1.628277 2.083749 1.221593 0.432739438 1.467986445 1.143366337  
0.9256149 0.4900832 0.7752756 0.562979 2.237173 0.6706907 0.3964174  
1.920078793 1.575675082 0.3370922 1.4474538 12.90436 0.522485951 2.3986  
2.402797 0.5013235 1.717935 1.478571 0.6928241 3.013518 0.2741109  
0.8990705 1.321247595 3.513122 0.5388007 0.5176932 0.8540311  
2.877860255 0.5149286 0.7325756 1.272813 0.736093909 0.6791032  
0.4394051 0.3623407 0.2862297 1.041452 0.5274474 0.5635537  
6.000971677 5.520572876 2.48591441 0.3441517 0.603141445 0.233608162  
1.161312 1.364208 2.561311284 1.232585 0.4190542 0.4899621 2.056959741  
0.4689709 0.377221 0.2455304 0.540492128 0.4885591 0.7557225  
0.3012487 0.8266217 0.6180355 1.606625 0.720269 0.3671578 4.044016  
1.068536 1.693523 0.363214423 0.9472371 1.137959 0.4909056 1.030316  
0.5992111 0.4465544 0.2960036 0.180912631 0.384017611 0.445410718  
0.3180829 1.517043 0.3191487 0.8770609 1.825642 2.383401914 0.3905756  
1.547343 0.377938 0.3553632 0.9174439 0.229867413 1.149121 1.58973  
0.7338568 1.467831 1.138303 3.865154 2.187802 1.907599639 0.5117381  
1.014244 0.495839894 0.2563249 1.122422 1.027923 1.520297 0.8645975  
1.829359165 2.411304657 0.424266158 0.3569906 2.268678 0.5128887  
0.4488124 1.429794 0.4795481 1.325576411 0.7423174 0.483411798  
0.2637167 1.293262 0.828896 1.310298 0.3093826 1.133446799 0.7591156  
0.5628688 1.102288 0.8793162 0.4097072 2.05802 1.153031 1.504546825  
1.085008 0.467411012 0.4899303 0.2370388 1.37484689 4.451589 1.282901  
0.5007744 1.75291423 0.4067903 1.429352 1.728853 0.56224136 0.5832871  
0.3566873 0.2392883 0.4625277 1.429433 1.578936 0.8469635  
AC068152.1 0.4674556 1.41266262 1.322018 1.935912786 1.041242186 2.683035548  
1.623371 1.731449309 1.277856 0.9484027 1.022747235 1.50969 2.624251  
2.448504 3.987068 1.079192 2.211332 0.975616686 2.703894 1.615725 1.954648329  
1.31481 1.068747524 1.796835 0.8978316 0.904772636 2.867651 1.1242  
5.065732 0.8611152 1.830272 1.212778999 1.121079 1.075078313 2.531869  
2.88881142 1.079108375 1.716268092 1.700046 1.174378 1.81544218 2.632227  
1.131023925 2.644149 1.066132203 1.846168 1.149591 1.165026 2.349380003 1.83764  
2.20912 1.281219 1.411421645 1.372381 1.516293017 2.665918 1.186124 1.515792  
1.790146 1.495776 2.072644 1.204186 1.306662604 1.361018 1.177227 2.331066  
2.207077 1.783045 2.448808 1.7299 2.764883 1.583181166 2.548091 2.246427  
1.562508256 2.206555 1.118003826 1.692419 2.405231 0.2958177 2.530425  
1.291699 2.27615 2.42024927 1.20343844 0.5865812 1.739538 2.082763  
1.162624411 2.392497 1.718103 1.760751 1.130643896 2.239951 2.854314 0.477178293  
4.027332 1.30419609 1.344774573 1.51491 1.142869907 0.837816 0.9086809  
0.422850739 1.588067 1.326747 0.920320999 2.283212 3.0442887 1.737338173



3.099359 1.346096055 1.185697 0.7600906 0.644621 0.9406558 1.176379  
2.425814839 0.8045137 1.358282 1.543772 2.213901 1.586381 1.800949 0.9472629  
1.268122 1.706832 1.815758 2.186772 1.07452788 1.94317026 1.820355 0.793492361  
2.072158096 1.768271 3.271558541 1.097018 2.334706 0.485334667 0.861500474  
1.620502138 2.062458145 2.142677 1.330103 2.893624 0.6272577 1.408537  
1.229344 1.450229388 2.069118 2.096508 1.488345864 2.160513 2.293229 1.038166257  
1.769281 1.808592 0.573071758 1.078161 1.376182 1.196928087 2.051803 0.8847792  
1.549696 2.633422492 2.169041 0.9434079 1.032913036 1.962223 1.843883259  
1.090524 1.315128 0.85228506 1.001738 1.41295225 0.9894971 1.576864  
1.290152 1.413305 1.159067 0.946549802 1.412533 1.132889 1.356163 1.93536  
0.5886219 1.514004 1.829401 2.275952 2.2009233 1.122800392 1.105622  
2.403942 0.5561505 1.151588 3.169351449 1.072336 1.31234981 1.065171  
1.211592 1.049534717 2.042478709 0.7455369 0.4685698 1.536102534  
0.7721814 1.171539 1.590562 3.252962 1.655678 3.189815 0.9905532 1.431338  
0.9639981 1.165087 1.863545 1.221066 2.643495 2.594567622 1.327058 1.144125  
1.361038585 1.005479 1.775433 1.400413 0.6997461 1.736016 0.939226684  
1.742412 2.216545 1.414607 0.1620504 1.609424 1.194662686 0.8390355  
0.7701905 2.113691 2.095872825 1.250420048 2.499985 2.023035 1.60238  
2.097423577 1.552744 0.8559241 1.56639912 2.163782 1.454134 1.340035 1.68638  
1.803217 1.141467 2.122932621 1.793998 0.818456481 1.27523 1.136934 1.543077  
1.982898 0.8741605 2.942895 0.9510066 1.206233133 1.260903 0.9016963  
0.785160423 1.175463 1.651786 2.31463 2.729146 0.9618607 2.617917 1.480769  
1.023938 1.318074625 1.337057 1.938130271 1.22141 2.533606 1.528078 2.062142083  
0.902075535 2.547332 0.9619055 2.789017 1.236829 1.669881 1.9571721  
2.138042 6.594494 2.25251 1.209210794 1.660383 1.747829 1.174962428 3.167654  
3.342614969 0.5674333 1.943208 2.561731261 1.503185 2.737258 9.74387307  
1.637770196 1.901657 2.086146 1.718612 1.732145 1.153938 1.474716 1.608047  
1.222957 0.8594234 1.619087796 1.344047 1.495915394 0.4139455 1.752434528  
2.534662 1.95681 1.289837197 0.7829247 0.9290018 0.9661462 0.589118573  
1.501153 1.028809 1.262926884 2.104096158 0.6083589 1.252692 2.524003  
1.527486388 1.388654438 1.220415797 1.595034 1.105485 0.3084206 0.9619903  
1.367684 2.218912 0.9283493 1.222695 1.279524 2.143025 1.635697 2.809880192  
1.545677 1.683067 3.260513 1.395527 5.209255 4.051403 2.785085 1.301723 2.770236  
1.47361 2.780278276 1.075515 1.151694 1.767457 2.450608 1.030599908 0.5833446  
0.9840106 2.228244 1.492396 1.830185 1.799562 2.392103 1.688828775 2.287613  
2.056276 1.754372481 1.225658 2.487849 2.006575 2.310568 1.480531 2.344190979  
1.197191793 1.871931 2.829437 0.95468 2.579121021 1.677280379 0.486741892  
1.325154 1.76498 1.904607 0.961385 1.245895 2.098022 1.508924 2.079542043  
1.499236889 1.445139 2.449901293 6.339927 1.105394986 2.738568 1.238724  
3.582902 1.121561 1.08348 2.347724 1.627929 0.7980764 2.422754 1.453845192  
1.766363 0.7368938 1.010568 1.19852 2.285630662 2.98173 1.644536 3.133561  
1.104227854 1.071383 1.661575 0.9484715 1.254807 2.52362 2.363456 0.8424144  
0.784892188 0.729695779 1.012766445 1.022476 1.468017267 2.194359712  
1.688371 0.9747437 1.76245495 2.313161 2.195966 1.252743 1.864594117 1.15277

2.939111 1.866912 0.547402512 1.355395 1.238636 1.959847 1.271948 1.263525  
2.057621 1.15762 0.9798355 1.004323 4.021788 1.584225 1.634037982 1.422789  
1.698352 1.636079 1.578858 1.972726 1.479859 1.761538 2.760902245 2.679436631  
1.249383127 2.615309 2.043774 1.765573 1.19121 2.623013 2.265785525 2.506239  
1.595281 1.94686 1.41344 0.8257631 1.789327249 2.692323 0.857366 3.0535  
1.46626 0.9817058 1.692806 1.061412 1.216908041 1.702595 1.141336 1.373628324  
3.083586 2.248457 2.040342 2.188635 1.489576 2.321985808 2.302669683 0.582035384  
0.8299847 2.868391 2.265743 2.369645 1.248318 1.686114 1.959555199 1.127393  
1.123337492 1.284838 1.364753 1.013964 1.605226 0.7290134 2.012053804  
0.8766915 1.467864 1.789938 2.10133 1.133356 0.7037609 4.236525 1.443265256  
1.291464 2.549897588 1.905672 0.6382764 1.784942029 1.49988 0.9274599  
1.440701 2.072933985 2.566152 1.986767 2.732735 0.811373727 2.048839 1.212093  
0.6322255 1.591076 2.303059 1.247932 2.716632  
AC008105.3 0.07651329 0.755746075 0.2547154 0.798310258 1.046225814  
0.237518584 0.8602068 0.571968527 0.103019 0.08639561 0.234442597  
2.556009 0.1790898 1.006484 0.6222063 1.569999 0.2464719 0.196123259  
0.1142997 0.4880063 0.116414935 0.7050606 3.822044954 0.9110986  
0.6676978 1.405694082 0.2469021 0.1504401 0.09129899 0.7357108  
0.06865367 0.257140811 0.8363302 3.123453466 0.2111256 1.678887316  
1.678349893 2.152704788 1.191818 1.278401 1.650127999 2.045417 0.105786519  
0.05385461 0.523121691 2.290575 2.675144 0.3873964 0.071292491 0.07390434  
0.7836681 0.9537004 1.270621046 0.3186226 0.246813662 2.468217  
0.05597332 0.825701 0.07942004 0.5065632 0.033083 0.7895224 1.223909019  
0.1269398 0.05212077 0.8169824 0.05528773 1.348914 1.049165 0.1315311  
0.1914664 1.356379243 0.09432855 0.005145873 0.69346739 0.1105109  
0.181771224 0.8891069 0.01979241 0.417455 0.1056024 0.1284534  
1.242752 0.06631161 1.045148682 0.04400542 0.2975782 0.841342 1.089538544  
0.1060596 0.419821 0.13088 0.908308392 0.3812441 0.8378172 0.382322588  
0.8192135 2.247187025 0.123263387 0.07063429 0.168358826 0.1682112  
0.4380433 0.123938417 1.579258 0.1837528 0.42815701 0.5260541  
3.226831421 0.899218185 0.09704949 3.739306235 0.1565541 3.248039  
0.3985295 0.3505934 0.8378638 2.285254685 0.5480864 1.502099  
0.1676664 0.02396449 0.2249018 0.5511671 1.255014 0.09729687  
0.7083441 0.7948162 3.252036 1.949001148 0.730486729 0.2447768  
1.670817809 2.679618241 0.03882614 1.785853467 0.5061975 0.01910727  
0.398081438 3.462534663 0.584866878 3.35555334 0.1292334 0.5681165  
0.4855403 1.411709 0.9336001 0.1260806 2.474820357 0.4525448  
1.977036 1.721797434 3.154522 0.2629267 0.24762929 0.79449 0.08812263  
1.041727748 0.4993698 0.8960955 0.43786349 0.8904276 0.8413895  
0.02984173 1.700082122 1.136094 1.689102 0.123982893 0.03132049 0.772825062  
1.628126 0.4149299 0.161030466 0.6475525 0.955340991 1.800939 4.975775  
0.06222051 0.4905798 0.1739067 1.949056848 0.1324606 0.2017736  
1.088377 1.491729 0.08938108 0.04801791 0.8590332 0.3961222 1.31081478  
0.053199583 5.971964 0.5876114 4.108759 0.1995802 0.842304985 1.109539

1.320234588 1.242227 0.9552764 0.19067458 0.534289236 0.1021336  
0.126063 0.953527175 0.9773915 0.3808526 1.440924 1.677906 0.6587525  
0.6054589 1.192794 0.03904698 0.0617558 2.421633 4.443483 0.1691161  
0.0350613 1.221140608 0.8437381 0.9559375 0.71646799 0.3719281  
0.09436571 0.7271317 1.13498 0.0703646 1.229448227 1.371919 0.3158497  
0.8930956 0.02334153 0.6637999 0.155602161 0.394578 0.7718512  
0.3639515 1.434966544 0.361825922 1.45179 0.08479369 2.830964 0.813373636  
1.387932 1.06257 0.866470508 0.489429 0.9511231 0.07430454 0.9245877  
0.07398564 0.619909 2.111555354 0.2978734 0.171922077 0.1335562  
3.523578 1.304586 0.07979697 0.7428277 0.159158 0.2853787 6.416692036  
2.153813 1.415166 0.040622666 0.7041417 0.07368054 1.044194 0.2494857  
1.731815 0.4769632 0.186124 0.6037938 0.778179746 0.01981358 0.250962409  
0.3688412 0.6500057 0.1882455 1.985530944 1.220929724 0.1677962  
1.1471 2.197517 0.6130207 0.3716485 0.193812138 0.07452757 2.609164  
0.2168092 2.90723189 0.1573417 0.05687237 0.709996929 0.04387162  
0.379107072 0.1776791 1.303358 1.261191135 0.4457227 0.8283006  
6.84328238 0.86248873 0.1720142 0.2765207 0.7140769 1.485366  
1.298529 5.066731 0.842696 2.418949 0.1233417 0.929668578 0.05410425  
0.075515095 0.06636252 0.169348521 0.1762373 0.0960874 0.655117089  
0.776196 0.06817879 0.1338101 0.967750752 0.2992032 0.2818799  
0.10043638 1.02602269 0.2844489 0.526032 0.1058738 1.891991745  
0.662673737 5.057192541 0.2617188 0.05823003 0.04164797 0.2279011  
0.1894226 0.1521319 0.2387826 0.34692 1.003251 0.1438162 0.1912368  
0.174212959 0.4505063 0.4541136 0.4743217 0.1472918 1.704266  
0.5621199 0.3035806 0.1656776 0.3600191 0.5345297 1.200664303  
0.7293112 0.2641538 0.6019491 0.1411239 7.210536589 0.2428825  
6.89332 1.763981 0.1375892 1.006401 0.0706285 0.1059595 1.160507354  
0.07790512 0.08172044 0.203319881 0.1894708 1.082327 1.101708 0.2988838  
0.513947 0.256207312 1.266475584 1.229147 0.8452518 0.8758655 0.077196496  
0.508455327 2.746373877 1.223548 0.3550151 0.329385 0.2369189 0.4719634  
0.1956994 0.1344488 5.109248597 3.744016519 0.0768758 0.823609279  
4.332593 0.466463903 0.687229 1.238405 0.05343988 1.447202 0.5797416  
0.09634277 1.714309 0.1035072 0.2096089 2.557449721 2.227752 0.1122648  
0.3959121 0.390847 1.575655506 0.1175596 0.3113708 0.7142438  
0.626037894 0.2516096 0.1971235 0.1495802 0.06329824 0.9119192  
0.2968859 0.8256521 1.301618525 1.037214928 2.015740403 0.0763528  
0.273925584 0.068911213 0.3714145 0.1378937 2.560823292 0.621493  
0.09758009 0.1205549 3.268274802 0.1025467 0.04778169 0.05335467  
0.223997606 0.1231378 0.2151124 0.2646506 5.358886 0.01594595  
1.133827 0.3461386 0.2904872 1.930703 0.3552908 1.115564 0.113505372  
0.01423171 0.3485954 0.0770686 0.6865043 0.2061671 0.08559025  
0.05418486 0.016525799 0.122443726 0.113419882 0.05203117 0.8598183  
0.0226524 0.7329199 0.6104162 2.050215578 0.05835055 0.7833484  
0.1229926 0.2742981 0.6616958 0.041466848 0.7949252 0.9197338

0.2960342 0.5147957 0.1849757 3.025459 0.6619618 1.421952093  
0.2054621 1.39691 0.538444847 0.04228905 0.8710762 0.6066189  
1.223768 0.7038059 0.613420744 1.815103966 0.078595905 0.04176822  
1.751996 0.09019158 0.3836272 0.8818967 0.2386887 1.071044863  
0.3001894 0.420349493 0.08624259 0.6403338 0.1680024 0.8486504  
0.09964589 0.908403827 0.358743 0.09771161 0.2639326 0.3367652  
0.4108879 0.8323175 0.5819067 0.952319047 1.048064 0.091145842  
0.03214176 0.04233918 1.241850886 1.662627 0.7951794 0.1661156  
0.825882158 0.04174985 0.7296152 0.9676179 0.411446272 0.3760147  
0.1667076 0.04378123 0.1115006 0.5589807 1.115329 0.2082135  
AC008610.1 0.884954 0.641187251 0.415586 3.085638089 1.54517161 1.141121285  
0.9190578 1.07425606 0.16248 0.240462 0.403373592 1.936484 0.7211682  
3.620158 1.201633 2.169719 1.659584 0.645542561 0.4406639 0.6725322  
0.381339235 0.930045 2.589424283 1.790124 1.884463 1.243199041 0.5153957  
0.5176839 0.7775747 3.177338 0.3464943 0.3590189 1.502711 5.411948706  
0.530056 1.744508247 1.369172426 2.594619585 0.9155814 2.720924 0.933931424  
2.159083 0.417112026 2.887914 1.063712674 2.722096 10.84056 11.80264 0.337324138  
0.1613918 1.853983 13.2289 0.529056859 1.353745 1.191644606 3.767257  
0.5296814 1.809487 0.8455051 1.456302 0.6887492 6.155139 7.721319152  
0.3655963 0.04110203 1.414858 0.5231936 2.256594 3.014682 0.4978771  
0.1294191 0.991709801 0.5680442 0.1460878 2.721885574 1.124209  
0.637081503 1.698543 0.4495144 13.82647 0.5710437 0 1.33729 0.806803308  
4.161184268 1.19723 0.5280026 2.047296 1.014804814 0.9650513 0.9757778  
0.2064218 2.07326643 1.460991 2.655429 1.707351219 0.1571413 6.92916396  
0.208295409 0.8740873 0.575321187 0.2567419 2.996566 2.429458784  
2.988937 0.5948772 1.157626988 0.9890274 3.660118094 0.727298761  
0.7653246 3.808849984 0.8080843 8.24126 4.56529 1.071873 1.489164  
1.693911501 5.248344 2.349507 0.458364 0.9449101 0.673952 1.557952 2.58843  
1.166258 0.6187509 1.880357 4.83744 3.593789938 1.27338697 2.55191  
8.134708333 2.624650136 0.3674158 1.163587118 1.267994 0.2260176  
0.275640452 2.947235739 0.314469107 2.350668919 0.7700049 1.530134  
4.157126 5.575994 3.340504 0.8837877 0.814590721 0.3823642 3.111414  
3.25870975 5.061537 0.7372156 0.113387507 1.690728 0.3971018 1.830767409  
2.795419 3.414703 1.044894683 1.489283 4.034159 0.5294914 1.293511918  
0.8399201 3.14295 0.273761379 0.7409726 0.360515981 3.725306 0.8376586  
0.448190617 1.390986 4.164720788 4.336973 5.19334 1.609384 0.7171199  
3.332538 2.405755864 0.2506976 1.145643 3.940649 2.59168 0.6041589  
0.3495373 2.164559 1.723469 0.81877076 0.10068664 7.991782 0.6781254  
5.407377 0.7869366 1.071177384 2.550771 3.176835781 1.691117 10.25419  
0.134654735 0.31884904 0.8284293 1.972951 1.653489266 1.384901 1.029728  
2.308224 2.585593 1.605687 4.378991 2.271932 0.2463371 0.6459176 3.016565  
3.486217 0.8001815 0.2073679 2.171556155 0.9538864 1.019283 0.736957753  
1.611381 1.506925 1.930619 2.466702 0.7009133 2.29227893 4.811738 0.6329475  
1.408576 1.3253 1.208001 0.779547963 2.080334 3.96155 0.7112838 1.068919618

0.253629366 2.009771 0.453537 2.900796 1.60354991 1.219599 2.730222 1.12542168  
3.288377 2.129169 0.2068093 2.160363 0.2471061 0.8455876 1.896427345  
1.189184 0.639145786 0.806717 6.457089 1.42887 0.6991917 3.41033 0.5334206  
1.006094 2.048014255 2.708387 6.390025 0.461299833 0.6776304 0.2535442  
0.8381477 1.411413 2.252199 0.4779055 0.7616478 4.685287 1.827942299  
1.031239 0.226179377 1.712263 1.620642 0.8678549 1.558752465 1.854965539  
1.323228 2.128455 2.79015 5.919468 0.7508092 0.611354827 0.2453086  
0.09996272 0.3218335 2.960872324 0.3722353 0.2242455 0.994104466  
0.4151617 0.61660668 2.697239 1.639044 2.045962849 5.015905 0.8164891  
15.89531608 1.599275703 0.62011 0.4724676 1.209655 1.023246 1.724004  
3.140807 3.787897 2.128506 0.3183261 1.945187099 0.3723594 0.317603211  
2.028908 1.686908124 2.326075 0.2597957 1.22503931 4.263607 0.4731342  
0.6331293 2.121327568 0.7078477 0.1693624 0.266123184 1.01846431  
1.325797 1.091046 1.618445 2.491809856 2.982938714 5.224535001 0.6693709  
0.5510369 0.06568651 0.488841 0.5660607 0.6259305 0.5178306  
0.8916626 1.617475 0.2655507 0.3619387 0.52755053 0.5844693  
1.611496 0.6412223 0.5739331 2.70598 0.7422418 0.5899531 0.6500734  
1.45503 1.701432 1.704301734 0.7734494 1.562322 0.9070553 0.2180359  
8.398038152 2.795379 10.50267 4.115109 0.6510103 1.848477 0.5012737  
0.2064395 1.489806495 0.6731178 0.33623 0.068715616 1.529309 0.6084457  
2.254178 0.4586544 0.6808947 2.520221123 2.420768957 1.027522 2.54013  
3.134054 0.786712224 2.284278715 2.1024989 1.530024 1.270072 0.6404805  
2.196233 1.733952 0.6029521 1.403921 4.059869294 5.339758452 0.9513249  
1.673857831 1.858657 1.177119088 3.228921 1.388526 0.8669266 5.159522  
1.586045 1.566987 0.941686 0.4033234 0.5360947 2.230326344 3.925511  
0.4346072 0.9167109 2.3442 2.748226842 0.7416527 0.5003549  
1.164359 1.472089321 2.344932 0.7315295 0.53081 0.4146908 0.4502393  
0.5233311 4.803691 2.815394718 5.316606245 2.171633797 0.7626753  
0.955016035 0.565165466 2.541423 0.237255 2.64363687 1.374838 0.2736031  
1.177624 2.276302671 0.5434294 0.6782447 0.3366006 0.847885084  
1.271199 1.495566 0.5807341 2.504281 0.5029941 3.493332 1.232732 0.7039892  
2.138978 1.520974 0.9482068 0.386680744 1.582445 0.9838512 0.8913767  
1.509741 0.7187824 0.3169367 0.4443894 2.408334535 0.308986066  
0.17888403 0.1641255 1.251777 0.35727 3.358338 1.094482 3.167576147  
0.5521773 3.660695 0.2327784 0.3605154 0.9276587 0.181110049  
2.286238 4.679791 0.8927546 1.873679 3.539788 6.715733 4.902428 0.523582918  
1.049927 1.201736 0.259086089 0.3144316 1.245358 2.020399 2.935484 3.27098  
1.875417759 3.349181821 3.594846023 0.9661838 1.571348 0.3282663  
0.2714246 2.050604 0.5999768 0.825508448 2.344724 3.055420123 0.4320649  
0.9360273 1.748806 2.031906 0.2276109 0.724990859 0.9052859 0.220156  
0.3943613 0.8262189 2.927128 2.703807 0.631335 2.095789416 0.8030724  
0.255562255 5.170733 2.175012 0.890285189 4.863118 1.316851 0.6046035  
2.128451818 0.9218607 2.924791 2.375551 1.749914156 0.5243761 1.099519  
0.5178829 0.8522298 1.53882 4.260171 0.9016836

AL109614.1 1.056415 0.13878461 0.2338787 0.94808903 0.161032204 0.389204309  
0.1231469 0.50379789 0 0.09021628 0.113502975 0.4455125 0.3720298  
2.789176 0.7513793 0.482901 0.08414071 0.227056885 0.4508941 0.2943733  
0.397417977 0.2654928 0.078346581 0.616791 0.3119166 0.233211085  
0.5478693 0.3641703 0.1620721 0.6135657 0.5281144 0.187078265  
0.4385 0.439279938 0.2677041 0.847347447 0.073383534 0.493300731  
0.8978022 0.235577 0.946056929 1.101374 0.117368754 0.2230703 0.498853319  
0.5200928 0.7510362 0.08386561 0.175773517 0.2522951 0.8858745  
0.9767244 0.496227555 0.4040086 0.223540014 1.110525 0.1528656  
0.1928641 0.08811549 0.1707418 0.234913 0.2904753 0.241406398  
0.3429101 0.2313093 0.473951 0.122682 0.5054487 1.131046 0.2334913  
0.3034707 0.770713713 0.07611367 0 0.279779261 0.4659195 0.08963235  
0.2963988 0.2108105 0.255537 0 0.06000733 0.8116112 0.294287444  
0.226259267 0.341764 0.09904774 0.2844824 0.342660108 0.5068938  
0.1634336 0.1290752 0.405128136 0.5593194 0.5337113 0.266900966  
0.6386911 0 0.078148063 0.2411318 0.041509313 0.1444862 0.2342185  
0 1.106631 0.3004419 0.049354242 0.432906 0.882771067 0.40930083  
0.2153503 0.921935819 0.1684313 0.2366286 0.062058 0.1436229  
0.4152523 0.688480021 0.1158276 0.4682892 0.03307087 0 0.2994308  
0.7306385 0.2499218 3.281668 1.418648 0.7653689 0.6757628 0.508797927  
1.279682269 0.3682396 0.268659482 0.714711489 0.103385 0.467735838  
0.3083401 0.08479707 0.129268136 0.379420914 0.324451062 0.336326037  
1.189546 0.5042542 0.6840642 0.1634372 0.2885858 0.8703938  
0.573032494 0.3945013 0.947514 1.167026755 0.4855353 0.4033572  
0.389955601 0.7085551 0.633183 0.176119354 0.5618477 0.2135208  
0.135180186 0.7351946 0.1991489 0.132436 0.947848643 0.3939005  
0.6738107 0.183409857 0.08339921 1.304273807 0.1725502 0.3437349  
0.378341339 0.176307 0.571652111 0.1718811 1.266481 0.1104525 0.1770055  
0.1543578 0.208932656 0.4310922 0.09768662 1.008033 1.499892 1.360006  
0.03278476 1.03768 0.4041309 0.729565784 0.141658173 0.5354194  
0.4664337 0.6762448 0.2952421 0.472803832 0.6120322 1.203342469  
0.5029347 0.4429293 0.227338328 0.341787038 0.1726718 0.04303546  
0.443110318 0.324741 0.111442 0.5212019 1.243667 1.063094 1.151569 0.4397205  
0.1155256 0.1730962 0.7301626 0.100612 0.1501057 0.2723003  
0.654687532 1.226064 0.1195042 0.322572916 0.03977343 1.046975 0.6036063  
0.2892046 0.164355 0.162266964 0.2980387 0.1978905 0.1467967  
0.2589712 0.4532168 0.040620837 0 0.1161164 0.07022599 0.965457496  
0 0.7877863 0.4253939 0.2800818 0.902427372 0.6159568 0.1873759  
0.376995159 0.5647356 0.1361624 0.0775905 0.1688589 0.0772575  
0.2974188 1.30152386 0.2065541 0.217994614 0.2774413 1.439639  
1.018556 0.07869662 0 0.5003206 0.0496665 0.606609423 0.8611269  
0.3188036 0.036056252 0.4237212 0.2675376 0.28963 0.6739506  
0.08989127 1.145529 0.2232455 1.643491 0.636819448 0.08793165 0.31821657  
0.4323881 0.8982272 0.4284223 0.632228311 0.049710294 17.49976

0.2495474 1.185834 0.444172 0.2223851 0 0.3451299 7.875822 0.3018629  
0.231428565 0.1396549 0.0420661 0.096457013 0 0.10515358 0.229988  
0.9992695 0.228453063 0.320772 0.3982284 0 0.517254013 0.3635191  
0.03408845 0.391239 0.7071851 0.4472624 1.528891 0.4541235 0.2802002  
0.04976219 0.539051903 0.04365669 0.148947568 0.4984073 0.197778906  
0.6586374 0 0.139275461 0 0.1210296 0.04948684 0.048529119  
0.221308 0.07942654 0.178292553 0.445790822 1.017432 0.1598974 0.4337189  
0.389531135 0.413317257 0.833057717 0.06278348 0.3289005 0.246442  
0.1348551 0.3539568 0.2641905 0.1766174 0.2280907 1.055378  
0.4358771 0.2036877 0.309259186 0.5159544 0 0.5194193 0.1538055  
11.1675 2.088551 0.4811696 0.143467 1.231596 0.7332301 0.901743638  
0.9486718 0.05861503 0.714647 0.178943 0.581817869 0.2330594 0.9489455  
1.245082 0.1436738 1.319176 0.1567228 0.1106454 0.159698316 0.5110922  
0.1892197 0.354484019 0.1978498 0.7609202 0.660719 0.3226453  
0.4561739 0.179531779 0.297777597 0.7324588 1.470058 1.797758 0.210827074  
0.774958924 0.493008394 0.271502 0.3074221 0.2002457 0.128747 1.133521  
0.2827687 0.08230026 0.908713964 0.676812575 0.1574634 0.490622112  
12.10071 0.690047437 0.7678036 0.5209457 0.2371634 0.5974519  
0.6340704 1.042188 0.7628086 0.05404231 0.2011315 0.489600405  
0.4772863 0.0452932 0.4486052 0.1954432 0.987201375 0.3478157  
0.2085807 1.012197 0.134706584 0.2706983 0.03430681 0.0553191  
0.2160879 1.266902 0.3616842 0 0.565862661 0.191796058 0.605558466  
0.07529994 0.17061998 0.163106318 0.3550224 0.2781659 0.349686133  
0.7402835 0.09623452 0.03451718 0.835455281 0 0.1590395 0.2367852  
0 0.3477594 0.4286218 0.1361745 0.6323919 0.235891 1.287221  
0.1651769 0.2201016 0.4179686 1.1638 0.6522034 0.080596941 1.61057  
0.4342592 0.2280176 0.4291085 0.1926229 0.06606 0.1603131  
0.176017507 0.181132942 0.125837871 0.1539411 0.5336823 0.03351005 0  
1.112114 1.021288163 0.5179133 0.5579502 0.1637504 0.4734024  
0.2175238 0.226495622 0.5879727 0.4102242 0.2021207 0.3124289  
1.53237 1.591328 0.7663701 0.638421272 0.2188392 0.1537044 0.040501525  
0.08043281 0.7230975 0.4812769 0.8471784 0.2957116 0.502583825  
1.077036582 0.174402249 0.164769 0.9324305 0.4310551 0.2864048  
0.492022 0.4965412 0.473173299 0.1691714 0 0.180113 0.3234532 2.08764  
0.6957761 0.2134871 1.020005039 0.1415184 0.1651958 0.3287912  
0.5535357 0.081955 0.1653932 0.9211363 0.491435108 1.12986 1.168556886  
0.03566086 0.05368545 0.70143424 0.4471911 0.08822411 0.2835432  
0.842221146 0.1235224 0.7645264 1.782514 0.369298709 0.2810499  
0.2690326 0.1942988 0.1903207 0.2255206 2.231897 0.5951447  
AC010186.3 0.5988067 1.043374727 0.8921676 0.775291388 0.573928707  
0.948245812 1.227557 2.376104555 0.8656529 0.7686729 2.149074135 2.29587  
1.271318 1.094028 0.6841357 1.498269 1.096446 0.512100188 1.958549 1.145182  
0.823295392 0.7667018 1.204188202 1.213634 0.7034913 1.217546908  
0.8829953 0.4664419 0.6566083 1.127562 0.6854764 1.181412673

2.307633 0.72573047 1.098935 1.776852599 1.471181854 2.214175478 1.095591  
1.259416 1.56297222 1.638206 0.810474611 1.671706 1.102667187 1.627203  
1.293328 1.022806 1.462410428 1.079034 1.353917 1.504853 1.37919531 0.8485193  
0.784261797 1.619174 0.8427724 1.114844 1.629129 0.570501 0.3041551 1.3042  
0.725951777 0.9902711 1.120669 2.692148 0.5790098 2.079409 1.832898  
0.3822815 0.9328699 1.42079545 0.8392533 0.6333383 1.151007751  
1.22494 1.003289059 1.634094 1.20332 1.38747 1.386967 0.882213 1.836657  
1.425792156 1.03005253 0.9298645 1.191416 0.8614299 1.755563773  
1.258168 1.501726 0.64692 1.489023587 1.340906 1.385025 0.815358431 3.069769  
0.67393865 1.390446604 0.523702 1.421627758 2.252941 1.385195 0.472584047  
1.152417 0.8461181 1.846966416 1.363817 1.67144559 1.378996729 0.6236113  
2.759588923 1.139631 1.139853 1.316704 0.6638456 1.374872 2.31811924  
1.035267 1.067677 1.574625 0.8410152 1.245055 1.045508 1.222775 1.779418  
2.009172 1.779014 1.628936 1.179410027 0.793400739 1.095058 0.942557729  
1.26037085 0.9499633 2.196671671 1.523312 0.4179164 0.98622791  
1.376427386 2.089338764 1.673166905 0.9510742 1.671908 1.639968 1.419844  
0.6680904 1.142528 1.813625503 1.725579 2.273142 1.624748173 1.478116  
1.516208 0.574487658 1.572697 0.3857967 1.441748988 1.282826 0.8828804  
1.366327803 0.8290726 1.264294 0.763329 1.874896013 1.342466 0.830207  
1.378864771 0.6548567 2.404959479 1.657562 1.419248 0.891931494 1.266556  
1.138080793 1.588918 1.660129 0.8426777 1.330717 1.579506 0.921502977  
0.6481853 0.9792032 0.7929184 1.080087 1.467398 0.7010815 1.432107  
0.4861173 1.379227181 1.175420174 2.012626 1.175958 0.8715377 0.31239  
1.757508742 0.6599733 1.493416821 1.111689 0.6448411 0.662546394  
1.277630066 0.5553141 0.9849938 0.984577699 1.247819 1.185353 1.942438  
1.444027 0.9669674 0.9234594 3.0402 0.8588648 1.595331 1.196977  
2.185141 0.9654822 0.9293358 1.701398662 1.051844 0.7087583 1.324173214  
1.010004 1.37307 1.520383 1.215955 0.7413667 1.064035857 0.9033683  
1.250795 0.9401117 0.1038363 0.8234206 1.119745429 1.003032 1.377332  
1.75985 1.507483528 1.430760875 1.757958 1.038695 1.885048 1.184577283  
1.918444 1.309552 0.957339221 1.132173 0.9705824 0.9916456 1.088925  
1.439137 1.225647 1.754012711 1.083553 1.383935504 0.6910489 1.857762 1.11951  
0.6179316 1.101506 0.6883574 0.8961357 1.959306511 1.53935 1.448701  
0.66863645 0.5368177 1.241563 1.092167 1.515995 0.8184657 2.987164  
1.275544 0.4178247 1.137559854 0.5288521 1.187306454 1.424102 1.587201  
1.223925 1.80880192 0.963364878 11.75662 1.93445 1.89231 0.3710289  
1.164123 2.064020586 1.638484 22.38388 1.109479 1.324231848 0.7291091  
1.883447 1.418087315 0.9498065 0.966213817 1.152691 1.386914 1.854896769  
0.9884359 1.233367 5.90405502 1.028341402 1.117459 1.0251 1.366076  
1.552778 1.000126 1.669606 1.450424 2.598052 1.180523 1.136102643 0.9992125  
1.511702008 0.6207147 0.455979741 1.733059 0.6988485 1.163405463  
0.9525402 0.8761935 1.025175 1.26477565 1.338419 1.453002 1.340393175  
1.38312976 1.032457 0.7426305 1.23181 1.453390159 1.296034323 1.26894956  
1.269163 1.020461 3.489321 1.95557 1.138328 1.696826 1.445826 1.314659 0.9036256



0.7281997 1.219379 1.105663245 0.8619812 1.30792 1.036757 0.8029866  
22.49019 3.935095 1.053067 0.8089325 0.4059531 1.58526 1.020312402  
0.8297429 1.165313 0.8243788 1.38372 1.824399817 0.5548403 1.449471  
1.02445 0.9541158 1.08935 0.9491321 1.085995 1.360683143 0.6931319  
0.958899 0.430705536 1.082514 3.098634 1.64839 1.036133 1.976402 0.864813932  
0.789754748 2.672786 1.075541 1.680298 0.475495751 0.891050083 1.253772852  
0.7386971 1.335349 1.371619 1.412435 0.8727582 1.066294 0.9762163  
2.02419538 1.413399467 1.394255 0.770480163 24.63622 1.106717229 1.532155  
1.261964 1.018846 0.95821 1.727494 1.388443 2.065852 0.541716 0.7728485  
1.442571356 1.19607 2.23981 1.205388 1.322398 2.006614065 0.8550171  
0.3223312 1.539729 1.007090165 1.102343 1.266657 0.6376916 0.8303187  
1.875503 0.9754307 0.7345934 0.795678561 0.935640514 1.581897476  
0.8491509 0.954907239 1.076352118 0.6947972 3.262327 2.352750866 0.34709  
1.323711 1.101426 2.512361935 0.9488657 1.00966 0.955999 1.228976974  
0.5477864 0.6314511 1.450316 0.6942767 1.213804 0.9677253 0.9989513  
1.654712 1.005525 0.8341708 1.357055 0.74057277 0.9602122 1.958841  
1.206305 1.613006 0.884967 0.8001347 0.7606305 0.676347973 1.228598454  
1.009111345 1.375925 1.364146 1.220445 0.8008102 1.600702 2.326662354  
0.8147808 1.283487 0.6656877 1.412306 1.665615 1.106807701 0.4911495  
0.8155577 1.210801 0.8742839 0.6643965 2.182233 1.015736 1.009149708  
0.9810389 3.021526 1.434477447 0.7435439 1.319558 0.8643507 2.021917  
1.117747 1.343429809 1.334521902 0.718702305 0.7845253 1.844197 0.7973022  
1.600261 1.987742 1.19455 1.365424327 0.7630926 0.858190472 0.7372208  
0.8646055 0.5397667 1.480798 2.226596 0.91695486 0.8747848 1.855999  
1.750882 1.017243 0.5134441 0.7736814 1.10471 1.204159708 0.7361657  
0.921063486 1.328566 0.4036041 1.049088212 1.479261 1.297049 1.117938  
1.85523473 0.6552032 1.397472 1.225026 0.616970332 1.250142 0.6367354  
0.216404 0.9157247 0.7987459 1.738068 0.7535601  
AC008760.1 0.3456668 1.10198217 0.7618672 0.944815744 0.655709365  
0.336771415 0.5515878 0.544415818 0.04654128 0.1102059 0.231087203  
0.8582035 0.5784063 1.580144 0.6883993 2.127852 0.4368326 0.439164204  
0.4590006 0.7962546 0.509749385 0.7876322 2.871185206 1.339477  
1.746384 0.605379941 0.6692631 0.148287 0 1.632874 0.07443819 0.365648015  
1.109582 1.252097238 0.3970962 1.070790933 0.605093236 1.486422007  
1.168258 1.151099 0.68484674 1.171809 0.071687329 0.3892814 0.656262293  
1.646087 1.37617 0.1536721 0.23619246 0.06163944 0.8617213 1.679236  
0.413303761 0.5992823 0.600755642 1.418252 0.5368682 1.484266 0.3229189  
0.4171477 0.2510932 1.485881 1.363893365 0.2692866 0.2825615  
1.215829 0.2622641 0.8875746 1.496794 0.1711362 0.556068 1.964130619  
0.3021801 0 1.217559781 0.5541775 0.072995053 1.58407 0.3433609  
1.092551 0.5316076 0.5131239 1.28437 0.539240986 1.900198545 0.1491036  
0.3831482 2.171978 0.767405459 0.4201772 0.1996463 0.3153499  
1.756874186 1.024875 0.8258262 0.512347586 0.1200321 1.847927988  
0.238659171 0.2061923 0.253533557 0.05883357 0.543619 0.527925522

2.162932 0.1572909 0.602898763 1.1332 2.336469389 0.583323292 0.219222  
1.313915333 0.5400972 1.300768 0.5685635 0.4093742 0.6917203  
1.132155136 0.7782058 1.564725 0.6463765 0.8228156 0.4877026  
0.8149181 1.133964 0.4923089 1.220966 1.280482 1.886845 1.514990329  
0.920567028 0.5397984 2.461406481 1.091341523 0.589365 0.761832132  
0.4035647 0.1553789 0.921145389 2.648519169 0.144124034 1.209716927  
0.3113825 0.4738338 1.274344 0.9649782 1.687103 1.29109 0.816668758  
0.8323946 1.666741 1.561382318 1.087382 0.598316 0.519665191 1.648672  
0.2274942 0.349607187 1.220158 1.499781 0.495397942 2.402404 2.098249  
0.2224481 0.602091144 0.6014734 1.208943 0.201643898 0.2037567  
0.649108949 0.9485229 0.4798831 0.462172073 0.7753395 2.880551655  
1.014833 3.590066 0.2248766 0.7135436 0.2828393 1.09747512 0.4069268  
0.1591086 3.104123 2.242902 0.2768915 0.04004903 1.432942 1.925336  
1.172656373 0.057681997 1.308109 0.4920857 4.926997 0.9617605 1.191227876  
0.6456915 1.819965688 1.866746 0.7343108 0.200568816 0.808941661  
0.4482294 0.2102841 0.839002904 0.5383722 0.9075647 0.5387351  
1.044472 0.7214715 0.7737001 0.5991303 0.03528078 0.03524165  
2.006883 2.150837 0.3667304 0.2375965 0.866395283 2.590665 1.934279  
0.168877199 0.242931 0.3836874 0.9358673 1.030414 0.3212349 1.61054693  
1.352284 0.362607 0.9563899 0.03163526 1.418697 0.074432058 0.3055884  
1.382987 0.3645916 0.929894277 0 1.684094 0.3197847 1.515195 1.233618092  
0.967419 0.9346491 0.414474852 0.8490665 2.522709 0.2132608 3.774809  
0.2359395 0.6963617 1.854892848 0.6812673 0.266296628 0.6470199  
3.032113 2.095565 0.2884013 1.555011 0.5752271 1.061748 0.679266965  
1.525299 0.7788847 0.132136177 1.337151 0.145252 0.7076091 0.6174606  
0.631401 0.3042062 0.272711 2.007647 1.376324068 0.2416839 0.367129353  
1.546854 1.477069 0.7326895 1.520492959 1.062684339 0.3790295 0.7621019  
1.473561 0.2712946 0.3169367 0.382076513 0.1405339 2.176156 0.1613272  
0.95413679 0.2558982 0.1027737 0.942635299 0.1189202 0.256905831  
0.1605414 1.502378 1.088382361 0.9143092 1.347136 0 1.042575982  
0.1776262 0.3539534 1.242612 1.264966 1.029686 0.8882745 1.501076  
0.6631779 0.5774881 1.468943637 0.05332989 0.090975264 0.3874446  
0.144960982 2.137151 0.173639 0.44660524 0.5320432 0.2217699 0.1511296  
0.118563853 0.3514474 0.1940508 0.152458326 0.700157097 0.2992091  
0.4687838 0.7064266 0.951682482 1.90307616 1.586324191 0.3834734  
0.5739663 0.1881545 0.1317884 0.1891682 0.5199511 0.2696891  
0.2786298 0.8863409 0.3613096 0.06220492 0.264448161 1.477211  
1.207267 0.6679045 0.6575968 3.534499 0.4252201 0.2938922 0.1533487  
1.016545 0.4215035 2.378339883 4.46507 0.1790065 1.184778 0.3903431  
1.312123904 0.498224 2.925619 1.616021 0.3290778 1.841682 0.335035 0.2196375  
1.146114776 0.2203543 0.1348351 0.492077935 0.4531655 1.161901  
0.9954448 0.3722389 0.8173006 0.420346878 0.500166525 0.7063839  
1.857709 1.379979 0.032192618 1.336475209 0.669162672 0.4737999 0.8449626  
0.635999 0.9174316 2.137223 0.2960768 0.2513397 1.982252972 0.95079341

0.4808832 0.928963646 2.568044 0.421472123 0.755554 1.527297 0.351794  
4.853382 2.293902 0.4406918 0.9808709 0.3961002 0.06142427 0.679640107  
2.665329 0.6639481 0.3196694 0.4178097 1.607919829 0.4704058  
0.1273984 0.6182372 0.575939376 0.8473626 0.649579 0.1351528  
0.1583805 1.010249 0.4576036 0.6962813 2.620964215 3.772119611  
2.589071402 0.2529573 0.468956229 0.199246493 1.239104 0.5097004  
1.08733573 0.962654 0.1959294 0.2319092 0.935523176 0.4447475  
0.09713927 0.02410423 0.485741746 0.3337824 0.8091897 0.1663473  
0.9932319 0.4610535 1.14359 0.4640844 0.2304604 2.01679 0.5732536  
2.172859 0.270751677 0.7329643 0.5967898 0.8356214 0.7338631  
0.5098236 0.1008715 0.1175006 0.3046095 0.287647561 0.153720314  
0.2350631 1.858008 0.3479476 0.9201479 0.9405205 1.757952815  
0.4745022 2.044733 0.7834639 0.5369893 0.3542953 0.224803508  
0.1478755 2.179869 0.9347133 0.6201896 0.5125451 2.490654 2.122003  
1.559758093 0.3341604 0.9701004 0.346329364 0.1801335 0.6115274  
0.9553628 1.921941 0.7901987 1.227887012 1.151220224 0.603628387  
0.07547911 1.690178 0.4701481 0.1749324 1.010842 0.3234997 0.735657188  
0.4133109 0 0.02750267 0.8466904 0.4250345 0.8868962 0.07451153  
0.415337329 0.4754071 0.4792725 0.8785939 0.586027 0.07508559  
0.7071403 1.064956 1.240670673 1.449218 0.420923328 0.1306872 0.426275  
3.855843322 2.676758 1.670471 0.5541905 1.829041322 0.5469828 2.252409  
1.682593 0.25062546 0.514985 0.3560302 0.1186752 0.3719853 0.3856863  
1.846935 0.3443748  
FTX 0.2010866 0.651177147 0.3169555 0.48416762 0.553834885 0.580643491  
0.6591463 0.450167139 0.1666135 0.1417832 0.18096555 0.608838  
0.5084165 0.6269957 0.2592761 0.6693608 0.2730937 0.281852441  
0.3080963 0.4770021 0.282418229 0.5805165 0.256964521 0.7000815  
0.4014002 0.446189245 0.6738471 0.4354662 0.1550415 0.4491963  
0.5634982 0.406501667 0.3402911 0.490261818 0.4154951 0.74670147  
0.579151898 0.593248028 0.3920866 0.8263122 0.560249195 0.8666687  
0.315446071 0.3897703 0.513922298 0.681683 1.026367 0.1489941 0.362720634  
0.393057 0.7062052 0.9640171 0.36989743 0.2208475 0.259666589  
0.5794646 0.4439261 0.474423 0.2528794 0.3383372 0.1203871  
0.9427895 0.911366238 0.3313823 0.1975672 0.4469145 0.7335013  
0.4921572 0.5306864 0.2488898 0.4644903 1.238486679 0.2054337  
0.3152132 0.391905407 0.501003 0.157197679 0.425312 0.3361095 0.2662782  
0.3156595 0.2911217 0.5520537 0.396428305 0.297611005 0.1467888  
0.3722366 0.2915806 0.447467359 0.4156331 0.3595913 0.2667965  
0.819400064 1.081579 0.5445968 0.25532307 2.474155 0.589568096 0.240293823  
0.2076045 0.190034399 0.1546732 0.30728 0.161073167 0.5545188  
0.3988534 0.445154018 0.3908852 1.159480799 0.463795288 0.3114654  
0.480344047 0.3164953 0.676397 0.7123919 0.2747854 0.4849412  
0.66585197 0.3996825 0.3802143 0.2530903 0.2519267 0.3364554  
0.6164601 0.5147548 2.706575 0.2974182 0.7662752 0.7519916

0.638828904 0.827772729 0.3145229 0.521353616 0.7515362 0.3626344  
0.532673723 0.364191 0.304195 0.17665802 0.303702912 0.278129771 0.546441445  
0.432535 0.4081678 0.3388806 0.387146 0.5521346 0.5919086 0.578629082  
0.2818159 0.6189498 0.417701543 0.4091788 0.7244718 0.210743218  
0.4680176 0.397024 0.22263359 0.5716007 0.3501574 0.274796937  
0.4370523 0.4218437 0.2420705 0.593261742 0.3633558 0.29927  
0.240622246 0.1937549 0.600742383 0.3713965 0.2113869 0.356184363  
0.2457602 0.579405275 0.2779567 1.617608 0.1308186 0.2201253  
0.160846 0.408304564 0.286532 0.3070469 1.219732 1.367681 0.2632998  
0.277783 0.6381425 0.5163873 0.734650477 0.183910749 0.6219492  
0.2839456 0.5148875 0.305971 0.668345265 0.5094461 1.139396327  
0.3330816 0.3675083 0.531609514 0.604293362 0.1061881 0.3322896  
0.439027518 0.3772228 0.3756655 0.273952 1.123859 0.922141 0.8681778  
0.325885 0.2920733 0.1458747 0.4084912 0.7562304 0.1051315  
0.3163071 0.554215037 0.9056977 0.2776349 0.390448198 0.2119823  
0.5866271 0.6028037 0.5170892 0.464938 0.701297868 0.5353087  
0.4890411 0.2507658 0.1132513 0.2245204 0.185966853 0.2461452  
0.4046465 0.2423266 0.720592982 0.357612443 0.7862951 0.3845813  
0.5796083 0.722337146 0.4509468 0.501467 0.425041753 0.5105546  
0.3535515 0.3287094 0.6876732 0.3246591 0.4132272 0.696643547  
0.5984276 0.175023154 0.2550657 0.7700044 0.6373712 0.4463197  
0.3969911 0.3941553 0.1628983 0.338505601 0.7208006 0.5271698  
0.108403956 0.4584209 0.3493676 0.4721433 0.5131408 0.1842683  
1.868368 0.3508508 1.186473 0.3414169 0.2313225 0.526682212 0.5107083  
0.5877926 0.4713134 0.515702457 0.387224704 24.39859 0.2660049  
0.7236652 0.1745143 0.4659982 0.22084255 0.2613755 27.57406  
0.3042381 0.632541217 0.388862 0.3219305 0.452576137 0.4070981  
0.4311091 0.1212308 0.7326986 0.312204283 0.4213198 0.7933046  
2.98073179 0.55136646 0.1788429 0.787292 0.5720945 0.6592503  
0.5407029 0.5172501 0.4307735 0.3087309 0.2108158 0.371167895  
0.1282718 0.333316335 0.2229133 0.227039347 0.455673 0.3357813  
0.290259418 0.3733578 0.2563687 0.192742 0.275227849 0.3508302  
0.2930699 0.22416247 0.822444809 0.3167077 0.4108102 0.559792  
0.490930068 0.760361479 0.743346022 0.35178 0.1059479 0.420985 0.3243559  
0.2539519 0.4974371 0.558158 0.25716 0.694098 0.410587 0.2458846  
0.418407707 0.4715383 0.5746652 0.8910349 0.3888529 20.8181  
2.552939 0.2613829 0.3651659 0.3252478 0.4479678 0.425711979  
0.8693883 0.2763567 0.5092468 0.5362494 0.53823043 0.3025744  
0.9849734 0.6316936 0.1816189 0.8782154 0.2168548 0.3931412  
0.387383008 0.3862069 0.3512485 0.352318814 0.1622291 0.5524334  
1.020322 0.5830042 0.4114493 0.374156289 0.345901798 0.4267333  
0.5299561 0.6723053 0.252102009 0.576253223 0.254526258 0.3206803  
0.3833627 0.4515325 0.3636213 0.9361776 0.3781514 0.1799547  
0.570659554 0.393096541 0.2331222 0.636960638 25.28876 0.183888864

|             |             |             |             |             |             |
|-------------|-------------|-------------|-------------|-------------|-------------|
| 0.5450434   | 0.5303842   | 0.5926543   | 0.7797371   | 0.7165467   | 0.5989175   |
| 0.7516651   | 0.1070887   | 0.1752274   | 0.650840745 | 0.9830493   | 0.4425689   |
| 0.2298992   | 0.3872848   | 0.674555408 | 0.3598892   | 0.1532126   | 0.7353175   |
| 0.225510509 | 0.2473951   | 0.1664373   | 0.1700981   | 0.3986632   | 0.4953587   |
| 0.291271    | 0.1335334   | 0.4092092   | 0.332878135 | 0.590574818 | 0.2289636   |
| 0.28563265  | 0.245191461 | 0.6619161   | 0.7640852   | 0.573457885 | 0.8909245   |
| 0.4076941   | 0.1768921   | 0.485237114 | 0.271164    | 0.1448957   | 0.2966251   |
| 0.156230293 | 0.1425745   | 0.2795649   | 0.388476    | 0.1975378   | 0.364277    |
| 0.6156913   | 0.4130876   | 0.5843944   | 0.7368435   | 0.2924378   | 0.6482197   |
| 0.382750036 | 0.2136271   | 0.9829168   | 0.475204    | 0.5072535   | 0.2434958   |
| 0.2934025   | 0.1577405   | 0.218495748 | 0.480220884 | 0.389799153 | 0.2498216   |
| 0.5214717   | 0.3251437   | 0.332212    | 0.8573322   | 0.50118098  | 0.404025    |
| 0.6657172   | 0.2871864   | 0.2587809   | 0.1560659   | 0.303725568 | 0.3686759   |
| 0.6671294   | 0.3709218   | 0.3735951   | 0.553451    | 0.9786198   | 0.4608219   |
| 0.7483086   | 0.1794396   | 0.6651668   | 0.354236427 | 0.3865506   | 0.5092959   |
| 0.9495742   | 0.8559119   | 0.2449977   | 0.452164253 | 0.484493747 | 0.1310861   |
| 0.3377604   | 0.965972    | 0.2945403   | 0.3979245   | 0.336199    | 0.2759534   |
| 0.487918752 | 0.3265557   | 0.181042921 | 0.3476765   | 0.4041432   | 0.3600178   |
| 0.9136414   | 0.1208686   | 0.567532857 | 0.4158085   | 0.4402258   | 0.4577515   |
| 0.4917007   | 0.1203998   | 0.4369847   | 0.4091185   | 0.584288453 | 0.4606469   |
| 0.33372192  | 0.1510759   | 0.2787931   | 0.456467161 | 1.665335    | 0.1898933   |
| 0.2169947   | 0.49449538  | 0.4072443   | 0.5193285   | 0.786159    | 0.204677459 |
| 0.5281143   | 0.3829795   | 0.1482537   | 0.1508536   | 0.3636722   | 0.7207125   |
| 0.2290153   | AC244197.2  | 0.04827022  | 0.443898866 | 0.07480547  | 0.414965122 |
| 1.682520198 | 0.186728937 | 0.2100704   | 0.099162098 | 0.146232    | 0.05771087  |
| 0.121012077 | 1.731874    | 0.2379855   | 0.3620158   | 0.6729147   | 1.081182    |
| 0.9957507   | 0.484156921 | 0.07210864  | 0.5918284   | 0.101690463 | 0.7278613   |
| 2.505894467 | 1.90703     | 0.5985941   | 0.149183885 | 0.7627857   | 0.0388263   |
| 0.05183831  | 0.252318    | 0.1039483   | 0.263280527 | 0.1001808   | 2.216817451 |
| 0.1467847   | 1.962571778 | 0.492902073 | 0.504898946 | 1.298461    | 0.5023244   |
| 0.5379445   | 1.045451    | 0.3057791   | 0.687322036 | 1.058593    | 4.360861    |
| 0.3218903   | 0.134929655 | 0.5037237   | 2.522362    | 0.519437643 | 0.8491671   |
| 0.085798412 | 0.710397    | 0.9376434   | 0.05636701  | 0.1820377   | 0.03756814  |
| 0.2787233   | 2.895494682 | 0.06267365  | 0.07398365  | 1.121781    | 0.03923952  |
| 0.5658325   | 0.4341143   | 0.2688536   | 0.5823857   | 2.618113874 | 0.1460685   |
| 0.02921756  | 0.357946596 | 0.2666729   | 0.172012006 | 0.5688143   | 0.04495144  |
| 0.4086642   | 0.1284848   | 0.1919318   | 0.4011871   | 0           | 3.835526369 |
| 0.03123209  | 0.2745613   | 1.956305    | 0.730659466 | 0.301096    | 0.1254571   |
| 0.1032109   | 0.492400777 | 0.9660429   | 0.3186515   | 0.243907317 | 0.3142825   |
| 1.003534091 | 0.024995449 | 0.09255042  | 0.079659857 | 0           | 0.08989698  |
| 0.150793994 | 0.5899218   | 0.08236761  | 1.602224    | 1.16078031  | 0.15273274  |
| 0.06887921  | 1.351527414 | 0.2424253   | 2.068724    | 0.3572836   | 0.09187482  |
| 0.5312694   | 0.40653876  | 0.2963771   | 0.4052899   | 0.2538631   | 0.1133892   |
| 0.06384809  | 1.361514    | 2.76353     | 0.2062503   | 0.7450471   | 2.408428    |
| 5.411027114 | 0.127338697 | 0.3768974   |             |             |             |

0.893672183 1.371591362 0.06613485 2.061211466 0.5635529 0 0.082692136  
1.352261104 0.018868146 0.262956184 0 0.1240649 0.393833 0.6969993  
1.107641 1.007518 0.468389664 0.7341393 0.09697915 1.457531997 1.035314  
0.7187852 0.249452514 0.4964264 0.3573916 0.22532522 1.717186  
0.7512346 0.648555321 0.117575 0.1910918 0.08471863 0.436560272  
0.377964 0.8890058 0 0.07113337 0.339915068 3.145814 0.1256488  
0.107565748 0.5413566 0.548524201 0.1466019 2.118883 0.0706559  
0.7926062 0 0.507881793 0.2256278 0.06248961 1.209063 3.209272  
0.1087486 0.02097224 1.789369 1.499418 1.449224245 0.060411984 2.226282  
0.2441251 1.32867 0.2518197 1.22870347 7.154023 0.58649276 0.5939532  
0.2833395 0.242378522 0.819897532 0.05522862 0.1651773 0.425182954  
0.02967644 0.2613925 1.461875 0.2585593 0.5100418 1.792522 0.1514622  
0.07390112 0.01845479 0.8173919 1.609023 0.02400545 0.1990732  
0.465333462 0.9114914 1.758263 0.176869861 0 0.2511542 0.4158256  
2.559203 0.3364384 2.906436682 0.8443239 0.168786 0.406922 0.0331325  
0.6160807 0.077954796 0.06401027 0.6685116 0.112308 0.356306539  
0.22826643 0.7019202 0.3139871 0.4095242 0.384851978 1.097639  
1.418383 0.072348537 0.805884 1.771081 0 2.225174 0.2965273 0.1268381  
2.941775101 0.2378368 0.174312487 0.4194928 4.160059 0.8573221  
0.1510254 0.7516646 0.1506129 0.4130281 0.280254582 1.074174  
1.753858 0.069194975 0.1355261 0 0.2117426 0.1385751 0.6900356  
0.1911622 0.142809 0.5028112 2.381547681 0.0281247 0.067853813  
2.291798 1.524877 0.08221783 0.657203742 0.508790548 0.7939365 0.4150488  
0.8370449 0 0.3319367 0.066693254 0.07359258 2.219172 0.09655005  
0.222065424 0.1340047 0 0.246812143 0.0249097 0.168165458 0.08406977  
0.5654703 0.40919257 1.322375 0.7838295 2.47260472 0.496326942  
0.2790495 0.3052868 2.127325 0.1938782 1.628634 1.86063 0.3417651  
1.926858 0.03183261 0.610081408 0.02792695 0.071460723 0 0 1.922304  
0.05195915 0.378648514 0.1772985 0.07742196 0.1266259 0.714007816  
0.08494173 0 0.114052793 1.099941454 0.1928432 0.2659424 0.06165504  
2.408749528 0.386426152 6.269442001 0.08032451 0 0.03941191 0.05175964  
0.1415152 0.07511166 0.1412265 0.02431807 1.01268 0.0199163  
0.0868653 0.316530318 0.24754 1.586704 0.4022212 0.1475828 3.117289  
1.039138 0.1231206 0.2753252 0.191638 0.1379539 0.288420293 3.105697  
0.1499829 1.61093 0.1635269 4.008154573 0.1863586 1.965638 0.6969135  
0 1.133197 0.02506368 0.08847407 0.229855859 0.01923194 0.0403476 0  
0.2214861 0.6084457 0.986203 0.3669236 0.2723579 0.133986439  
1.000055372 0.3452474 0.1621359 0.6371713 0.134864953 1.574694263  
3.854581317 0.2977344 0.4178946 0.1280961 0.1372646 1.670899  
0.5168161 0.1052941 4.152139051 0.822611437 0.03357617 1.067084367  
3.542381 0.308993761 0.3820132 0.9664139 0.08669266 1.108342 1.04523  
0.06837763 0.7961527 0 0.4824853 3.843753912 1.046803 0.1158953 0  
0.250048 0.210502481 0.07946279 0.03335699 1.005325 1.486451168 0.324683 0  
0.1415493 0.1105842 0.4727513 0.4296824 0.729235 1.297092566

1.006065489 0.704313664 0.02408448 0.191003207 0.10433824 0.7462052 0  
0.284699355 0.4735554 0.02052024 0 1.187636176 0.02328983 0 0  
0.063591381 0.03177997 0.3240392 0.2177753 0.3178511 0.03017965  
2.507714 0.1690604 0.08045591 1.898343 0.3122 0.3792827 0.051557433  
1.212086 2.152898 0.1215514 0.4117476 0.08214656 0.06338735 0.04102056  
0.206428674 0.069521865 0.295158649 0.09847528 0.5803693 0.321543  
1.883589 0.5472409 1.039360923 0.2208709 0.5491042 0 0.0865237  
0.3710635 0.03622201 0.5531221 5.694475 0.07388314 0.1748767  
0.3034104 1.611776 3.954626 1.193769054 0.1166586 0.3605209 0.569989397  
0.03430163 0.6404699 1.000578 0.9290323 0.1655195 1.259209067  
2.755898184 0.037188062 0 1.616243 0.4333115 0.1424979 0.2002915  
0.1270539 1.045644034 0.4058177 0 0.05760865 0.3251463 0.4769471  
1.548119 0.05852852 1.46033873 0.1357929 0.07925616 0.525815 0.02360625  
0.2097047 2.116023 0.589246 1.299389438 0.987779 0.095835846 0 0.2403961  
0.534171113 3.432789 0.1410912 0.2176573 0.079816943 0 1.726106  
0.7515379 0.078746137 0.2022594 0.02868311 0.08286126 0.07304827  
0.1442643 0.437531 0.2003741  
AC010201.1 0.204925 0.64611946 0.1512271 0.851801626 1.332789998 0.503322856  
0.5414661 0.270629892 0.177374 0.1050017 0.176139802 0.4254581  
0.2361826 1.28597 0.437261 1.177614 0.3264348 0.264268986 0.3207054  
0.03263027 0.400876986 0.2354317 0.547120292 0.9039922 0.5647231  
0.678579477 0.3000748 0.1412846 0.2200728 0.5440932 0.09456407  
0.174190652 1.117943 0.946801924 0.5638074 1.088240859 1.110333638  
0.918635583 0.3634581 1.523252 0.38062894 1.433497 0.182138918 1.112696  
0.62527213 1.43078 2.465474 1.561764 0.163664674 0.1957623 0.4073322  
3.340223 0.455042339 0.3134808 0.346900985 1.801706 0.1482655 2.125005  
0.2962747 0.7507371 0.1822751 2.000313 1.545336236 0.4941353  
0.2692183 1.654879 0.1189902 1.004989 0.702086 0.2536407 0.3296591  
0.659880553 0.05905857 0.03543981 0.379903968 0.2663824 0.11591344  
1.236162 0.2180977 2.577612 0.1558473 0.4656124 0.4866251 0.097862253  
3.598988841 0.4167171 0.07685371 1.65553 0.20679467 0.1685623  
0.07608743 0.1001528 0.597263906 0.6509857 0.8006329 0.443775813  
0.6480623 1.217249684 0.181911324 0.1122602 0.064416304 0.5231829  
1.090417 0.243876706 1.001775 0.5328473 0.114885709 0.983716 2.13100209  
0.317587125 0.1392466 1.311482157 0.2940529 3.549722 2.552078 0.07429384  
0.5858273 0.657488612 3.325323 0.6839675 0.6415137 0.3025812  
0.1032605 0.6901652 0.4986535 0.8934495 0.3252261 1.523405  
3.146051 1.529809323 0.33097955 0.4285899 1.125683231 0.554563174  
0.1604382 1.008134342 0.5126766 0.09869437 0.066868332 1.051437587  
0.183090902 0.405944143 0.758178 0.6922361 1.645428 0.9722494 1.663415  
0.06432011 0.617542734 0.3895866 1.205729 0.560563909 0.7534789  
0.2682646 0.110027877 1.492277 0.1156007 0.239147253 0.4843913  
1.325411 0.393336792 0.8556848 0.9657801 0.179831 0.558949855 1.039168  
0.6862107 0.11384997 0.2372759 0.299857737 2.543837 0.4191201

0.326183171 0.6019251 1.737275467 2.000505 3.09927 0.3999473 0.6867157  
0.5090234 1.069967346 0.09122607 0.176861 2.020578 0.6019683 0.7914482  
0.02543855 1.365275 1.254303 0.446912373 0 0.8308917 0.2961147  
0.7121144 0.38181 0.82543669 1.036127 0.867011432 0.8405171 0.6873607  
0.176397702 0.66300356 0.234466 0.2337463 0.103146235 0.3959607  
0.3170594 0.4666316 0.5066216 0.4353546 0.357413 0.5249085  
0.04481966 0.1343098 0.8498281 3.161731 0.08735315 0.1811013  
0.846648382 0.514235 0.2318161 0.107268295 0.2160287 0.2437126  
1.405061 1.234207 0.4335927 1.101687515 1.651828 0.255914 1.101066 0  
0.4395783 0.06303752 0.9317051 1.756906 0.1907156 0.806748387 0  
0.7422489 0.1015613 0.310461 0.266749255 0.5803519 0.8723391  
0.292520318 0.9775075 1.197389 0.06020448 0.4454748 0.08991915  
0.2692374 0.673257404 0.2884873 0.169147673 0.7632439 4.160059 0.41596  
0.162834 0.2026092 0.1141799 0.1926876 0.287640209 1.169299 2.127365  
0.139884903 0.3013782 0.02306548 0.5457763 0.7844037 0.4882428  
0.0772909 0.06928879 1.524729 1.254316597 0.1705711 0.192043045  
0.8147884 1.259885 0.1329696 1.165085551 0.771430113 4.237269 0.580891  
0.7297501 0 0.2875907 0.283137564 0.4909579 4.801543 0.2342233  
0.493821414 0.1625427 0.1305607 0.424113151 0.06042909 0.326365556  
0.1019735 1.371789 1.489006295 0.9402711 0.3089957 0 0.682296358 0  
0.3967517 0.8803602 0.7055013 0.5072159 0.9837662 1.492374  
2.065439 0.4633413 0.675657792 0 0.14446535 0.7734543 0.337615918  
0.8943442 0.126049 0.432269763 0.4608354 0.03130332 0.2687868  
0.075310003 0.1373749 0.06162911 0.19367854 1.185945107 0.672496  
0.4466468 0.3178374 1.242572261 1.233475289 1.825104227 0.146146 0.14583  
0.1434156 0 0.2403137 0.4327614 0.2740841 0.2359754 0.6141716  
0.09663095 0.2370699 0.191969776 0.2251926 1.383316 0.4878795  
0.1193416 5.750509 0.8102806 0.2053436 0.1113198 0.9556272  
0.7362652 2.067254881 0.8226989 0.2274046 0.4224862 0.1586817  
0.833441665 1.039812 1.788185 0.9660918 0.08361015 1.052828 0.06080264  
0.1502421 0.805441416 0.09331051 0.2202307 0.050009698 0.3070336  
1.476044 0.8886263 0.2225323 0.7787058 0.185737816 0.173290018  
0.9272814 1.769984 0.867117 0.122689644 1.025765347 0.80758021 0.4213309  
0.4472564 0.3418268 1.232077 0.5736052 0.1253758 0.1596473  
1.141581934 2.15314134 0.3665399 1.180127891 5.331186 0.588968266  
1.390104 0.768009 0.6572186 1.251662 1.135365 0.352493 1.090311 0.1677313  
0.4291736 0.310822076 2.169127 1.370622 0.1160281 0.417036 0.851105712  
0.5012042 0.08092159 0.5787086 0.365828159 0.7088911 0.2129564  
0.1716941 0.1341346 0.300368 0.2405487 1.684829 2.268515466 2.946626769  
1.537751499 0.1168544 0.297874049 0.031639605 0.3541771 0.7338428  
0.641326722 0.648522 0.2737931 0.3749589 0.468181576 0.2542473  
0.4113428 0.1224852 0.115700985 0.1927396 0.3628132 0.05283067  
0.595837 0.6955291 1.361984 0.153798 0.3171676 1.297251 1.106931 0.2760335  
0.031268628 0.7841147 0.04211912 0.5897492 0.7325041 0.07473055 0



0.1990257 0.045525516 0.056218298 0.130187822 0.1493086 0.7039665  
0.3640184 1.859659 0.9071701 0.576322882 0.1339541 2.297849 0.1270582  
0.1574251 0.1969127 0.021967978 0.48306 1.718839 0.7169401 0.6969623  
0.3680255 1.54344 3.171447 0.457262415 0.452808 0.4372985 0.251409464  
0.06240991 0.8631847 0.5134735 1.502509 0.7170322 0.942422231  
1.079446617 0.451077422 0.2556971 0.7935128 0.1433429 0.0740763  
0.9370783 0.2568528 0.36714743 0.3281612 0.29369185 0.3843244  
0.4660978 0.5399513 0.4459801 0.1893145 0.640696287 0.4392313  
0.5768087 0.5740147 0.1431676 0.2861595 1.069441 0.6126288  
1.143951723 0.2630062 0.348735994 0.1383509 0 0.259171911 2.637102  
0.7872368 0.6160238 0.822927465 0.2156496 2.791604 1.571703 0.191032295  
0.3543701 0.1043747 0.07538073 0.08860484 0.6299543 0.9496897  
0.7048346  
C5orf56 0.6965639 1.098501563 0.8079136 1.132738328 1.090728963 1.175001175  
1.117718 1.338712366 0.4777816 0.5866246 1.302560789 2.232373 0.7225871  
2.933554 0.6957885 1.405803 0.6961108 0.648130948 0.4515657 0.5395727  
0.969067696 0.9006069 1.678431934 1.243377 1.276688 1.516437551 1.100177  
0.5779023 0.06116159 2.264542 0.4858578 1.053543292 1.209262 1.53587356  
1.165664 2.80579767 2.379463887 2.43437793 1.464005 3.024892 2.55505624  
3.1332 1.16521461 0.7955538 1.180762904 1.108988 2.089599 0.8131257  
0.681690469 0.4862999 1.373413 1.8776 1.427387901 1.206292 1.007103983  
2.567244 1.009529 2.125225 0.5866063 0.7302444 1.118351 1.591562 1.944639424  
0.8134027 0.3760178 0.8860264 0.7496532 1.562622 3.057824 0.4283661  
1.09236 2.005837555 0.4374769 0.3155553 2.371513993 1.1119 0.398959381  
1.294912 0.5344407 1.197991 1.379887 0.5643865 2.343149 0.995843684  
1.799634295 0.379831 1.567956 0.5305861 1.540675347 0.9837667 2.474608  
0.9517083 1.886357884 1.604147 1.786852 0.76149642 1.782727 1.58086565  
0.723662756 1.086359 0.679597807 0.6794678 0.8539612 0.898697656  
2.267958 1.422839 1.128958633 1.105869 4.000453507 1.403992966 0.5980444  
3.742301044 1.173441 2.024071 1.289847 0.8532931 1.251448 2.170750992  
1.872813 1.074711 0.4512018 0.5557124 0.9039764 2.052708 0.9991034  
1.3671 0.8442201 2.132895 2.931266 3.12749104 2.233802398 0.8316438  
1.999620205 1.938704293 0.7602865 1.602175093 1.163592 0.3716936  
0.487822873 1.699316615 1.803192961 2.898556409 0.8854721 1.065184  
0.7545843 1.698483 1.4002 1.063594 1.038724505 1.016092 2.039777 1.568032662  
4.409997 1.017004 1.16080401 2.144992 0.7914413 1.296021989 1.326522  
2.091902 1.289067729 2.153381 1.031914 0.7458221 1.545231005 1.287515  
2.092902 0.768806748 0.7860079 1.598590331 1.322351 0.9892644 1.081190775  
1.095243 1.595819239 2.045688 3.080657 0.7609599 0.7789565 0.8894395  
1.710341191 0.9010107 0.7524094 2.745739 2.897655 0.4244014 0.3026401  
2.268353 1.323301 1.98184614 0.268660473 4.31305 2.289484 0.6618281  
0.8570489 1.58693835 1.741116 1.848039844 1.58798 0.9147303 0.824183251  
1.416312302 0.9247944 0.7145783 2.477396204 1.333219 1.061085 0.330528  
2.160706 1.453859 2.043598 2.258336 0.4326088 0.9731276 2.267935 3.066664

1.843167 0.4607206 2.223551813 1.277429 0.6938101 1.519621796 1.346229  
0.9360831 1.191489 1.908515 1.068706 1.954814404 1.085167 1.392084 1.431802  
0.4269993 1.022901 0.575434647 2.134969 1.176377 0.9051241 1.96612881  
1.056566452 2.275406 0.6972223 2.629605 1.684046408 2.674399 1.425091  
1.13376449 2.161424 1.625842 0.7477802 0.6509526 1.01145 1.087843  
3.513681603 1.609325 1.142221398 0.8610197 4.905377 2.085275 0.9427201  
1.39471 0.8526235 0.8564013 1.833300072 1.592333 1.70652 0.8519857  
0.7400541 0.7679971 1.97458 1.046669 0.7384673 1.136391 1.109466  
2.854206 1.885575001 0.5258232 1.087961351 1.416544 1.79913 0.7188317  
2.06468491 0.707081917 7.70279 1.164841 3.475557 0.5995584 0.6928955  
0.744511846 0.8148514 13.29289 1.088763 1.441025216 0.6729634 0.6007927  
1.558677792 0.5561452 1.251512645 0.32809 2.751247 1.008017089 1.433985  
1.170232 0.67322548 1.660681386 0.7597786 0.9737101 1.233387 2.14671  
1.925544 3.82765 1.772673 0.8947227 0.8609404 2.113679158 0.6640632  
0.789084673 0.8049528 0.700433845 1.345526 0.5871052 0.832854518  
1.611423 0.7143768 0.4683113 1.01429019 0.963642 0.8600066 0.794971832  
2.440250082 0.4375512 1.39991 1.813002 1.090552843 2.327622733 4.113881531  
1.530918 0.9902172 0.4256563 0.8941094 0.9221722 0.570922 1.653448  
1.149877 1.616062 0.7157947 0.6326681 1.077286398 0.8743102 0.3712655  
1.084033 1.16977 21.85547 3.307589 1.005676 0.8641665 1.327641 1.149374  
2.046520857 2.280852 1.306765 1.51144 0.9676571 2.886789251 1.772537 2.75204  
4.434759 0.3545061 1.744016 0.5573084 0.7355227 1.043062129 0.4468354  
0.6170242 0.697862923 0.8902145 1.154125 1.818245 1.046907 1.179432  
1.191712561 0.91411265 1.33393 2.433881 1.792679 0.954725015 2.48250378  
1.415236864 1.576269 0.8857127 1.155598 0.7100974 1.82549 0.6472912  
0.9651836 3.979425715 2.286908148 0.6582176 2.170498083 10.29988  
0.737146975 2.253597 1.672534 1.276591 3.205031 1.556034 0.9650038 2.645545  
0.7373252 0.4524901 2.310169895 2.699744 1.427875 0.8573093 1.231141  
2.343518458 0.5062739 0.3844813 1.640795 1.388175896 1.062796 0.7289853  
0.5170807 0.5118562 1.945069 1.433893 1.998122 1.812362631 1.351810081  
2.413057466 0.723519 0.948475218 0.764663978 1.183698 1.369484 2.558033766  
0.8068944 0.6332072 0.8877617 3.610878037 0.9617503 0.3508697  
0.5842529 0.741627766 0.455717 1.092662 1.130549 0.9283652 0.6546311  
0.8152653 1.65327 0.4107382 1.58458 0.6233618 1.370032 0.842264278  
0.6233695 0.3435127 0.4743653 1.522179 0.5013791 0.7632187  
0.6217312 0.437718656 1.255622486 0.630735373 0.7552114 2.032563  
1.048627 2.313798 1.375761 2.080655771 0.8594632 1.599722 0.758969 1.181833  
1.10292 0.836652136 0.6666589 1.78624 1.530526 1.791206 0.959555 6.888702  
2.111955 2.340800878 1.007948 1.070841 0.735991889 0.7066839 0.771807  
1.535046 1.431633 1.13525 1.753153098 2.759132078 0.752649899 0.3515526  
2.374931 1.011762 1.073424 2.360549 0.9013516 1.166277085 1.333289 1.717189548  
0.5934282 1.231356 1.212029 0.8008733 0.1628991 0.961600586 2.012966  
1.510556 1.247927 1.591844 0.9873039 0.9442254 0.8632998 1.884976291  
1.163248 0.669735468 0.4844678 1.081542 1.365204289 2.170485 1.731256

0.6189625 1.801950163 0.6884531 1.629241 2.514289 0.855238113 1.168706  
0.7705532 0.3741358 0.548056 2.731228 1.931131 0.4382716  
AL132989.1 1.399711 3.163293192 0.7088771 2.976465908 0.78093164 1.48637531  
0.9853886 1.663246212 0.2771468 0.3281304 0.577958724 2.792069 1.25472  
3.175719 2.022332 3.813864 1.040511 0.770784542 1.093314 1.74368 1.127466522  
1.931275 1.937717701 4.137758 2.117711 1.950915996 2.297448 0.30906 0.6779029  
1.689664 2.127692 0.898170547 2.369553 2.98242606 2.309014 4.548506715  
2.642380534 2.655430982 3.57779 3.027464 1.758709612 4.807038 0.341510471  
2.086305 2.065631142 1.960444 3.27796 0.1830192 0.383589081 1.394806  
3.794872 2.684108 2.100195408 1.805313 0.975659021 4.993858 0.4725964  
2.300842 0.2563916 0.9108207 0.897135 2.35072 1.273146331 1.995546  
0.6730457 2.654702 0.535456 2.734611 6.006127 0.6793948 1.368674 9.047581023  
0.3598881 0.1661241 1.475519876 1.444887 0.456409171 2.075242 1.2268  
0.511185 0.9740459 0.3055581 3.273985 0.244655633 3.209464134 0.3196409  
0.3122182 1.965941 2.021787174 1.922664 0.3804372 0.4694662 4.391068516  
2.441196 1.708247 1.026231567 0.8219907 1.630245113 1.193793064 0.4209759  
0.483122279 0.6306223 0.7496618 0.057158603 3.515155 0.6868734  
1.400169574 2.789195 4.816159858 2.059354017 0.6266095 2.54285958  
1.409004 2.639341 1.083429 0.8358056 2.581302 3.852472337 1.095335 4.007622  
0.2886812 0.4899753 1.185882 2.911634 1.740093 2.135903 1.852851 3.364723  
1.474712 3.145978849 3.164991945 0.5625243 1.407104038 2.1373789  
1.453972 3.402453403 2.627467 0.3084199 1.034369509 1.498298561 0.729502813  
2.664008438 1.5452 1.721185 2.114839 1.149262 2.609082 3.648156 2.47789022  
1.46095 4.935035 1.576585995 2.393865 1.94911 0.954147994 4.393381 1.571447  
1.121002747 2.633878 0.7377774 0.885007781 2.700755 2.861123 1.22831  
2.840715546 3.524383 2.512021 0.346886628 0.3437804 3.373399537 1.600358  
0.7501298 0.79507148 1.15426 5.301924463 1.208638 5.834753 0.5356437  
1.004322 0.6175652 1.45904638 1.054801 0.4263614 8.004909 3.687056  
1.854957 0.1669405 3.216274 3.292544 3.603231009 0.412185934 2.628993  
1.326347 1.862273 0.7158938 4.062696209 1.376106 2.855302072 2.983085  
2.807746 0.753365187 3.294298939 0.8478456 0.3443584 2.062924703  
1.451106 1.243017 2.391487 2.736661 2.341463 3.37867 2.017617 0.4622028  
0.3147887 3.485623 3.147093 0.2729786 1.018695 2.381198574 6.146716  
1.521293 0.536341476 0.3182565 1.827844 1.95898 2.384264 0.6934295  
1.652531273 2.973291 0.9596774 1.708551 0 1.442366 0.265939539 0.2547631  
1.3937 0.4597607 3.53852808 0.346098406 3.622557 0.9521369 1.688132  
3.313525901 3.616531 2.453454 1.096951191 2.05403 2.080022 0.5079753  
3.046262 0.421496 0.9014646 5.585932526 2.554314 0.634303773 1.559513  
6.861209 2.80773 0.6487917 1.851974 1.134663 0.505805 1.961183241 2.881486  
3.200324 0.209827354 1.797995 0.3243583 1.655388 2.311189 1.01354 0.9419828  
1.266686 4.964031 2.993255515 0.2878388 1.260282483 3.729454 3.468035 1.90105  
3.248059226 1.446431462 11.4659 1.85159 2.290384 0 1.590736 0.948005236  
1.087918 13.23152 0.5215127 1.220524518 0.4825487 0.3060017 0.467771857  
0.3115875 0.803165235 0.3585007 5.479701 2.725413308 1.996348 3.141952

1.60670247 2.596237982 0.2115479 0.6695184 2.447553 4.629852 2.352548  
3.526368 3.67264 1.299392 0.6877722 1.176368476 0.1270288 0.297959784  
1.285428 0.201418587 2.126064 0.3545129 1.13977379 0.8928686 0.2934686  
0.2159894 0.600126587 0.5151559 0.9822139 0.363147262 3.984034344  
0.685288 0.5117828 1.016612 1.448268344 3.908574821 3.671596394 0.2740237  
1.059546 0.1344521 0.510108 0.5471429 0.4484205 0.8672191 0.4424538  
3.166822 0.7700279 0.8149277 1.079829991 2.111181 0.2819258 4.57387  
1.174769 20.9736 3.966999 1.40007 0.8088077 2.372926 0.7216236 4.532058777  
6.048461 0.469022 3.044871 0.6694384 2.539392573 0.08476727 4.799172  
3.215274 0.4964353 5.401228 0.3135136 0.5432861 1.85871096 0.503002  
0.7111615 0.961123889 0.503727 2.698393 3.941143 1.04312 2.964391 1.153605964  
1.028909483 2.271466 4.904331 3.110311 0.345064625 3.481854358 0.87664957  
1.805704 1.062234 2.243238 1.311163 3.979386 0.999088 0.6884789 5.351165316  
1.13236854 0.07636247 2.712390717 12.30847 0.451765431 2.482328 2.538977  
1.725199 7.562123 4.15118 2.157724 2.803656 0.3144962 0.9144324 1.813128774  
3.372729 0.6260054 1.06057 1.101828 4.189035927 1.536143 0.6069119  
3.274612 1.053389119 1.107642 0.6488514 0.4828897 1.037447 4.991911  
0.7141289 0.7897635 2.161035399 3.850705437 4.925610272 0.4929793  
1.303198965 0.533918337 3.135943 0.5665698 2.86747044 1.928195 1.120063  
0.5523948 3.578888008 0.6356183 0.6555776 0.430612 0.108469674  
0.7227737 0.9070329 0.4209944 0.8543251 0.4118264 2.170662  
1.057361 1.235124 4.134987 2.92208 4.011112 0.527658098 1.998574 2.764067  
1.713959 2.091382 0.5604791 0.720811 0.4198198 0.19206077 0.553398873  
0.45769156 0.6438933 2.406944 0.4875247 0.8468091 3.215199 2.633975673  
1.098842 4.620674 0.6154382 0.6395394 0.4219559 0.494279508 1.459244  
3.43171 1.848361 1.221578 3.662562 6.390808 2.490082 3.322297236 0.9551419  
2.198916 1.001709585 0.7021114 2.063551 3.676003 2.288979 0.914216 3.168488535  
3.819412929 0.845770167 0.2097516 4.879229 0.873496 0.9028049 1.431647  
0.6501587 2.221659165 1.507491 0.11800119 0.09826476 2.386511 2.603336  
2.112537 0.4437058 4.381231962 0.9779759 0.6008424 1.554623 1.637479  
0.2980829 1.644265 3.422106 1.668262929 3.808111 1.155187979 0.3891119  
0.2343146 3.30444186 8.880702 1.700688 0.4950191 2.269101466 0.4492699  
3.140554 5.717069 1.283498234 0.6644439 0.6849588 0.2591213 0.3322682  
1.246785 1.597364 1.891205  
OTUD6B-AS1 3.814665 4.796703134 3.555158 5.563598782 2.92691463 4.317319018  
4.219018 3.167031787 5.679864 3.812145 3.41375292 2.49954 6.84847 6.570235  
5.954434 2.698576 2.716433 3.023986598 4.399019 4.938036 6.650749176 3.358692  
2.496594842 4.797788 3.693799 3.585664095 4.337078 3.3265 5.568607 3.670184  
9.922854 3.287272406 3.286926 2.930311775 4.512 5.490780919 4.134488636  
4.272137022 6.837294 4.454315 5.12590803 5.663189 4.457538569 15.35665  
3.786149619 6.287104 2.658724 1.339156 5.75808767 4.932858 5.126986 5.107932  
4.78756477 4.620046 3.528933839 4.49126 5.32157 4.333001 4.645002 4.246335  
6.23266 7.403012 3.274011505 4.782138 3.712336 3.450212 5.553985 3.652191  
4.137856 4.070263 4.862713 4.423431704 4.09459 5.035178 3.136016352 4.98434

2.308315178 4.823282 5.277137 4.254113 4.458339 3.66539 3.210345 7.595439774  
4.188733405 2.33882 3.064172 3.44413 4.446800724 6.240929 8.496873 4.335871  
5.096133048 2.761245 4.495574 1.249573432 6.796746 1.695520029 3.623695372  
4.250532 1.826361405 3.257533 2.956048 1.988879673 5.169989 6.835502 4.845504077  
5.72887 5.365501839 2.858759796 4.222028 3.862482511 3.960833 1.509733  
2.072741 3.231392 5.290872 3.545120825 5.209349 6.655494 5.356816 6.27877  
5.430842 5.22977 1.65554 17.00141 6.04764 4.919157 5.539976 3.108745597  
3.652507223 3.07609 1.581089444 3.120283061 6.536076 4.424718235 3.845458  
4.659281 3.590458861 2.9971483 3.231056248 2.928843128 9.9505 4.706166  
5.065627 3.160565 3.001161 5.589395 3.691567488 4.446306 4.344695 2.747385312  
4.81128 5.870212 3.757317409 3.378474 5.71886 1.906560153 4.979824 6.201075  
5.085296833 4.662478 3.867363 3.527617 3.772548014 4.982366 2.299278 3.813661385  
5.811445 3.614236349 2.313096 5.909873 4.807252728 3.604502 4.311586238  
2.728597 2.311913 3.219317 5.850283 2.327537 3.353694226 4.940691 2.561148  
4.826503 4.897491 12.9445 2.430061 7.477844 5.447105 6.771291414 8.478312761  
3.164067 4.452809 3.021205 3.726222 4.807148772 6.025108 3.304359404 4.389021  
2.510501 4.255385411 6.860746275 2.877605 3.802024 4.863270319 2.361423  
4.364549 4.953797 5.753828 4.993359 4.394949 2.339682 4.297586 3.673237 3.204357  
3.199088 3.948554 6.301024 7.096122335 3.556001 4.403927 2.352083638 3.034046  
6.608711 4.552056 7.242909 4.930206 2.149787492 3.336974 4.146496 4.991732  
5.680964 8.260034 2.240459851 5.546971 4.874185 3.266145 7.53726588 4.478717267  
3.870698 5.067669 2.488648 7.497079034 4.006611 3.490663 4.032486776 3.350185  
4.468713 4.685309 3.911429 6.609933 3.383854 4.785740849 5.357827 3.659517922  
9.266559 3.773061 4.990274 3.535725 2.826717 5.600345 3.42855 3.684635434  
3.575697 2.125167 3.454451743 3.503609 4.332119 4.370891 4.598672 1.607743  
9.296902 5.747199 2.964615 3.93834803 3.635898 5.458454769 6.805257 4.955175  
4.693103 5.46372069 2.017349442 14.11493 6.08326 5.8508 1.145948 4.114427  
4.01655099 6.453557 6.531214 4.559636 2.460926396 4.662047 5.197659 5.568983932  
5.034048 5.506502229 1.844229 5.057 4.326518542 3.514108 4.483458 2.4641987  
4.81500734 3.523334 5.191247 4.116643 5.95608 4.622879 3.073421 6.331229  
2.840338 4.368547 4.415075021 4.407895 5.148822955 7.105473 4.42135419  
5.967504 4.386544 2.731360055 3.735459 3.139397 2.943409 1.935576116 3.086306  
4.120504 3.165216504 6.132514452 2.412104 5.244699 4.252456 4.943395789  
3.764347352 3.287101098 3.270226 4.816102 12.72052 4.062214 3.032673 5.131458  
4.538192 2.891965 7.290029 5.247162 4.144876 4.295599286 5.37629 3.218599 6.13998  
5.201461 5.911007 5.008125 4.526077 6.594987 3.81111 4.553329 6.06195759  
2.860001 2.636213 5.991637 4.456238 2.958447448 1.580404 1.654219 6.214001  
3.473808 4.220774 5.04331 6.592607 4.231513718 4.293308 4.785042 6.406384667  
2.897122 5.252743 4.229327 4.202062 5.271718 7.673855679 1.705215307 3.494498  
4.414798 4.312904 3.484067388 5.619838589 4.056468797 3.037153 5.648427  
6.453643 3.288707 5.226881 5.256017 4.097427 4.46863399 1.859415557 3.279278  
4.224992031 6.271049 3.873349147 5.16344 4.075652 6.562868 4.428412 6.077578  
6.722946 3.765269 3.350021 4.018061 5.195368493 3.009515 13.59305 2.963844  
3.263908 5.08623833 5.063627 5.897621 4.58208 2.857796039 2.909179 4.581007

3.730039 4.981328 5.602198 6.043741 4.273476 3.271633839 2.292251751 5.316489832  
5.103554 3.795180096 3.537064596 5.332991 22.18532 2.677715781 7.103446 3.44239  
4.281768 4.828712471 3.279956 4.775931 3.313154 2.613236435 3.089993 3.178917  
4.130446 2.967024 5.131896 3.981915 5.49158 2.942318 2.570538 6.149102 4.489852  
3.574271133 9.446663 4.439856 4.687667 3.823929 3.169799 5.340983 3.603925  
6.580630341 4.673163578 5.138941646 4.183622 5.362393 5.811158 3.571564 5.98896  
3.078349694 6.22355 4.659642 2.685159 4.9326 3.202904 4.220747228 5.566163  
1.896473 4.356941 3.352209 12.35392 2.875746 4.709671 5.430989945 5.564588  
2.943772 3.716542308 3.826852 6.248285 4.561904 5.386163 3.989892 5.942969394  
5.357162152 1.807912904 10.62745 4.20095 5.191261 2.556242 4.247963 3.711606  
4.520147591 4.397 2.397963272 4.087971 6.62765 12.59167 2.231717 2.498752  
6.60095361 5.303997 4.889771 5.573932 5.012508 2.014403 2.683265 5.68662  
4.315376544 5.29689 2.722334496 1.999216 4.3798 4.818811928 4.06926  
3.986338 4.207292 3.397466831 4.203175 4.597157 7.954716 3.061476126 7.032964  
4.939949 2.242229 4.389987 3.912447 5.226068 3.592913

PTOV1-AS2 1.792557 3.031645562 0.734405 4.230622311 5.056589619 1.487828267  
2.118415 0.825381489 0.4057235 0.2217045 1.053739576 4.533748 2.341047  
4.354326 3.862259 7.431118 1.809272 1.611963316 0.6617594 1.222917 1.074310532  
2.951526 6.642457504 6.540182 3.662301 1.934250004 1.425575 0.4723297  
0.2987164 4.505522 1.547412 1.271949333 2.745325 6.856956102 1.394072  
4.703211043 5.71071666 5.024209273 3.517336 4.87262 2.89896696 4.918448  
0.400598793 3.158621 1.791730778 6.119467 8.518407 5.118097 0.76312854  
0.1860029 4.125582 11.43837 8.22217264 2.198436 1.171935294 5.416833  
0.6730646 4.360425 0.2646623 3.333443 0.6013473 4.431737 4.968476407  
0.6219885 0.2526388 2.484745 0.3140504 2.678341 5.327412 0.3634065  
1.143518 8.261810959 0.6234922 0.2993157 2.392105841 0.8738058  
0.452776253 4.385537 0.6619682 4.265008 0.6032801 0.4669778 2.780235  
0.051657494 6.208970091 0.4199388 1.014198 3.160557 2.557427169 1.171533  
0.6158396 0.6476156 8.14727334 2.554307 3.206094 1.827159065 0.6640486  
9.08730179 0.384094291 0.7110912 0.697056191 0.5917863 1.630829  
1.898805435 7.780855 1.19539 0.707507297 2.343018 6.76930178 1.508771681  
0.2940103 7.788127178 1.690158 7.285024 7.06612 1.098067 2.597569 3.253700977  
3.937571 4.490417 0.5282611 0.5953211 1.103767 2.511137 6.682834 2.994759  
2.601516 3.979827 7.196247 5.756864521 4.682244422 0.7239525 10.233483915  
2.390638903 0.5504773 4.363654804 2.345383 0.1910214 0.1588368  
8.347366085 0.628200456 3.673394841 1.931454 1.620484 3.740387 3.257773  
9.185743 4.328875 2.673000221 1.512974 3.399603 3.459740258 5.082116 2.076887  
0.871188467 3.620712 1.144142 2.434553096 3.605235 1.989573 1.577961088  
3.688729 4.180327 0.8272074 4.239357289 3.726807 3.880957 0.540870826  
0.3188138 2.552308154 7.456006 1.267081 2.117799241 1.96416 7.941149354  
6.687905 11.19914 0.4674708 1.101967 0.4899691 3.987774857 1.300172  
0.4934622 8.790688 5.719581 2.437011 0.2819874 4.989277 4.088438 4.938316194  
0.502842664 6.74338 1.493599 8.902804 1.652644 3.522024587 2.962534 4.447516347  
2.693739 3.628297 0.496603502 3.692210442 1.060843 0.511167 3.611630639

1.197066 1.430191 3.317053 3.552931 3.108428 4.810926 2.729216 0.1892678  
0.307219 5.270928 8.179909 0.3381412 0.4939127 2.785746289 5.374585  
5.555428 0.962583529 1.482425 2.337068 3.30901 2.625693 0.7674075 5.848589943  
6.591812 1.242796 3.527331 0.08485547 2.366762 0.632223812 0.2254125 1.35543  
1.021091 4.790807868 0.730764963 4.955155 0.5092955 3.212043 3.96017039  
4.018514 3.517496 2.069087995 2.615517 3.717957 0.3336847 3.264408 0.8227206  
1.644525 6.930010231 1.082885 0.312501565 0.8780834 9.942663 5.247683  
0.6124181 6.149575 1.627315 1.993554 3.65780804 6.260427 6.110933 0.487340952  
2.646601 0.1826299 2.355584 1.380182 4.731066 0.6527794 2.304208 8.224022  
5.718158838 0.5942477 1.028198624 3.516648 3.509158 1.666994 3.948954885  
2.972607532 0.5591704 4.17015 3.919046 0 1.320724 0.491072272 0.3651753  
2.764951 0.5254569 3.86262871 0.4861982 0.1895236 1.593442198  
0.1435412 0.646031526 0.5651905 4.580793 2.825805831 3.109366 2.948459  
0.2261634 4.74559068 0.3275581 0.6143252 5.320085 4.613689 3.93153  
7.560252 3.326113 2.381359 1.304421 5.825319376 0.160928 0.930339905 2.728019  
1.00447711 4.400533 0.3160467 2.595520059 5.043512 0.6609499 0.6283329  
1.013703561 1.142105 0.2277205 0.379730023 3.729988644 1.342763 1.231226  
1.026379 5.584041149 3.502925131 8.269167245 0.3857225 0.4426217  
0.07570323 0.596526 0.7429892 0.5771042 1.482948 0.3892555 3.863337  
0.548331 0.4727493 1.342662511 2.3774 2.57156 3.69502 1.811123 4.906633  
1.235619 0.936117 0.8814175 1.731445 1.854894 5.590401875 10.01105 0.8402633  
4.33482 1.005139 7.350662193 1.551166 20.30332 4.64064 0.8679763 6.946814  
0.4332857 0.668442 1.291831371 0.4679207 0.6070874 0.963529964  
1.053458 5.492962 3.734516 0.5432791 2.453826 0.870135368 2.667954826  
2.889476 5.045233 4.815965 0.474927656 5.20921587 3.410309393 1.953973  
1.290617 1.853574 2.654184 4.925267 0.529446 0.5056277 8.843961473 8.704352229  
1.182387 4.039071715 4.830199 1.582724639 3.371889 4.310049 0.9019892  
6.949598 3.356154 1.587039 3.535402 0.7968467 1.153311 5.323169858 8.154591  
0.2597164 1.025879 1.621004 4.73973533 1.210895 1.196026 3.523892 1.97243754  
1.538356 0.9273906 0.8156729 0.4425261 4.093525 1.100457 2.601356  
5.4851249 7.63562042 6.493730672 0.3700959 1.08317836 0.23381761  
1.994194 0.1822897 4.635260134 2.151778 0.5386813 0.9189399 4.410390844  
0.5368272 0.5428278 0.2101286 0.83467573 0.9563504 1.755548  
0.6971789 1.7391 0.9661617 3.187282 1.285409 0.9401269 11.82933  
2.567862 4.371206 0.544679327 2.3282 4.491059 1.712175 1.880569 1.4201  
0.9740461 0.5384199 0.3003883 0.578669286 1.151074141 0.4886463  
2.360723 0.5215513 3.842413 3.865903 4.829450546 0.7424437 6.679963  
0.6818666 0.3600925 0.920631 0.405860006 2.81903 10.56842 1.880391  
3.742962 3.646217 7.196687 8.998168 2.896442279 0.6871793 4.427779 0.895784456  
0.3294365 2.688276 2.599536 4.337338 2.528327 3.653804058 4.135615173  
1.500063921 0.1181006 5.605374 0.9836436 0.8732748 1.740419 1.125332  
2.836558924 1.333817 0.730846079 0.2213118 2.914557 2.911258 2.948879  
0.5246398 3.222822792 2.63732 0.9810822 1.481328 2.221826 1.309117  
5.283852 3.974901 3.958542619 6.771831 0.834511938 0.1460596 0.02198847

3.639047237 11.50247 1.969347 0.8129346 2.478577461 0.5312188 4.844374  
4.894864 1.008381617 1.093567 0.3305708 0.4642215 0.6392021 2.346164  
4.305303 0.9493777  
TMEM147-AS1 1.145213 1.344364632 0.3865488 1.64801598 1.309920814  
0.727171527 0.5840542 0.828765753 0.3351087 0.3189598 0.577465948  
1.477589 1.067415 3.11973 1.969699 2.186173 0.8162549 0.355694416 0.2689295  
0.3299962 0.352981429 0.8830505 1.824109638 2.165891 1.618309 0.834573154  
0.7447834 0.2407566 0.4926453 1.417201 1.096468 0.348453001 0.8453821  
1.346839863 0.5012653 1.889695873 2.274912209 1.188233101 1.470962  
1.970478 0.981983051 1.718712 0.158560943 4.231863 0.850412746 2.658293  
2.162093 2.263577 0.336491068 0.33504 1.227907 3.325313 1.299277094 0.5872753  
0.48576133 1.488672 0.6294343 1.540031 0.1823604 1.550861 0.2633404  
2.454723 1.483203594 0.3210428 0.1529209 1.393654 0.277701 1.315744  
1.524751 0.2698004 0.8269342 3.057159108 0.2691 0.4174882 0.835357592  
0.3298747 0.553922634 1.610216 0.5150589 3.288784 0.3348521 0.3466939  
1.301115 0.246518621 2.526639424 0.4041724 0.3017841 3.336272 0.820782655  
0.4339811 0.4256136 0.2754769 2.434962671 1.417994 0.9787527  
0.410988096 0.554991 2.029166998 0.363897524 0.2287253 0.268456504  
0.207655 1.086602 0.176169425 2.000781 0.3923155 0.6554089 1.197234  
1.991882044 0.585304118 0.1671302 2.414816301 0.5664407 6.114668  
2.504441 0.392187 0.9375166 1.251312192 2.112464 2.548778 0.2652136  
0.4830068 0.3614861 0.862884 1.323859 1.40499 0.8924708 1.288417  
2.072825 2.385677458 1.679760382 0.3556441 2.247196406 1.081963138  
0.3863197 1.50579045 0.6267337 0.3436733 0.152342547 2.136026077  
0.267062517 1.027958987 1.747465 0.7258268 2.085227 1.12278 1.976601  
1.186593 1.268282044 0.6185188 1.617774 1.830593874 2.981971 0.8173815  
0.424917289 1.224908 0.4078976 0.66063787 1.28121 1.26124 0.577012688  
0.8907293 1.97489 0.6452407 1.634692658 0.9340848 1.151183 0.370088553  
0.1869831 0.591507801 1.175465 0.4827225 0.569125525 0.5716425  
3.479373888 2.272646 3.001898 0.1619167 0.3327441 0.3527293 1.14225405  
0.4258093 0.3622185 2.310742 1.868716 1.338898 0.2007232 2.369299  
2.031691 1.254923322 0.25245222 2.631698 0.6289163 2.057643 0.5388872  
0.955563157 0.825234 1.682496578 1.057535 3.595745 0.233067143 0.8252409  
0.357355 0.8572462 0.752740378 0.3840409 0.653469 2.20572 1.345907  
0.684997 2.396484 1.122952 0.3287452 0.1343375 1.97547 3.765359 0.3494845  
0.3119609 1.097733033 1.228703 1.442708 0.417240333 0.6790869 1.340695  
1.297247 1.02664 0.3259701 1.930973537 2.221248 0.4891807 1.12661  
0.2143828 0.7474369 0.343274911 0.3192609 1.962533 0.3936211  
1.565798217 0.338476976 1.674043 0.3555376 1.135141 1.041277319 1.225439  
1.284541 1.176823867 1.423484 1.146755 0.1739599 2.772414 0.3264404  
0.4659194 1.709677528 0.6804001 0.206778591 0.5045841 3.377533  
2.080228 0.4614579 1.609949 0.5989334 0.5310707 1.845344676 2.023489  
1.638463 0.124367726 0.7459885 0.1486748 0.8241848 0.51059 1.28287  
0.4509564 0.6198773 3.690911 1.005349455 0.2615962 0.387214066



1.225097 1.334621 0.9051181 1.325472378 0.973059305 1.198666 1.34278  
1.798305 0.354291 0.4922009 0.40906065 0.2132882 1.875736 0.2863318  
1.431877917 0.4546112 0.1886265 0.704228172 0.1511038 0.435243631  
0.390979 1.45824 0.957415332 1.76414 0.8347244 1.99986346 1.369333926  
0.2633138 0.3674383 1.373105 0.9713529 0.5992907 1.707475 1.769104  
4.491139 0.321831 1.662674776 0.1581129 0.394953222 2.246605 0.515055509  
1.703863 0.3186895 0.663550545 1.918836 0.2643936 0.2560401 0.35988851  
0.3053404 0.2431426 0.178343923 1.010457449 1.267282 0.3116141  
0.816574 1.224166906 1.461283629 2.032536581 0.6171878 0.2512033  
0.0531278 0.2069924 0.5837392 0.3796934 0.3617131 0.5572787  
1.012454 0.3302237 0.2956665 0.533359123 0.7841652 1.417021 1.150407  
0.4310446 2.897732 0.7003866 0.4377415 0.250521 1.205544 0.7475746  
1.59052333 3.791931 0.5610468 1.408577 0.4056033 2.068595695 0.6179864  
5.794288 1.959423 0.4769857 1.755075 0.2466392 0.4555896 1.001844825  
0.316284 0.2447511 0.263994394 0.3796057 1.44354 1.352205 0.4667958  
0.6451214 0.441218098 0.956500986 1.319737 1.735378 2.631215 0.163619859  
1.320797274 1.232876105 0.5719239 0.5301908 0.545654 1.243432 1.300439  
0.4389054 0.2483913 1.966462397 2.106894286 0.393772 1.142294289  
2.617505 0.541486288 2.026732 1.40606 0.5638636 2.936601 1.659236 1.131436  
1.651382 0.2330081 0.7891482 1.247382275 2.440036 0.1249827 0.5351288  
0.7457633 1.740396451 0.3877634 1.065687 1.123201 0.615647071 0.574816  
0.3195003 0.2957563 0.4285736 1.171373 0.5235238 0.8987602  
1.51265489 2.431219303 2.13620552 0.2792095 0.518628206 0.175811759  
1.465108 0.1583124 1.244539547 1.402331 0.2849141 0.4821892 1.448859918  
0.3233687 0.7268552 0.2824546 0.347174391 0.7154254 0.7022551  
0.2847572 1.44121 0.3783481 3.370342 0.4216073 0.2331797 1.704794  
3.386224 1.380452 0.371825752 1.998815 2.363837 0.9405159 1.143386 0.4927694  
0.3902081 0.2073611 0.392105955 0.346750853 0.300217028 0.285404  
1.219539 0.3236385 0.8857343 1.202432 1.945490035 0.5061531 3.190263  
0.3435984 0.1982798 0.4939463 0.166014438 2.138428 2.508041 0.4730787  
0.8856948 3.378981 3.158987 2.409915 0.978234782 0.3459662 1.382855  
0.429579559 0.1803324 0.7098757 1.351388 1.568045 1.491734 0.942616185  
1.21511109 0.396027225 1.07628 1.800037 0.3956017 0.2552042 1.380836  
0.6679547 0.971842661 0.4704612 0.345042376 0.3300434 2.255262  
2.023091 2.36079 0.202503 1.231395258 0.8176265 0.470089 0.8222149  
0.7891747 0.9399272 1.098185 0.9106218 1.276969365 1.321797 0.374645377  
0.2583082 0.2638752 1.517907847 6.28176 1.053669 0.3423059 1.038285539  
0.5778467 1.791648 1.718749 0.396296674 0.3907961 0.6263769 0.1591699  
0.4168567 1.131817 1.874937 0.8400332  
AL139287.1 1.76105 5.423386145 2.538735 8.395642496 4.253447355 3.626271666  
5.703465 4.164615437 1.488839 1.61583 3.162302656 4.389603 3.63452 11.05743  
10.60301 10.78324 4.155701 3.573793021 2.895865 2.647617 2.502085929 5.269766  
8.929683522 7.885479 5.248037 4.873114792 7.031546 0.922376 1.53937 6.184479  
1.896181 3.533452854 5.779859 8.159175956 4.566425 9.197890679 6.850524003

10.709482184 6.39818 9.802484 4.450062258 11.8782 0.934287713 2.83651  
4.290357247 10.00805 7.650751 6.554553 1.831687547 1.424095 9.473638 10.28813  
10.234371926 5.638477 2.86328119 11.7259 2.364566 15.36647 1.275316 4.571694  
1.529977 5.872625 10.547301958 2.020657 2.25976 3.858526 1.631337 5.658063 21.3627  
1.470027 4.941226 16.558984478 1.07407 1.239475 5.428605556 3.194223 0.972952192  
7.882597 2.135776 3.814023 1.889548 2.019262 5.406122 0.547622971 11.543325766  
1.642921 1.397702 4.47765 3.760877156 3.694396 0.957992 3.187505 8.091647348  
4.341029 4.943697 4.511337537 1.54658 4.013950661 1.908655084 1.727528  
1.396799127 1.672946 5.745877 3.497040325 10.13045 2.42266 2.250093154  
9.431888 15.331858117 3.1840989 1.402566 8.464712319 5.256386 6.635513  
5.321715 2.650327 4.548509 8.278224495 8.172444 8.611612 2.153891 2.001055  
2.636352 5.068959 5.735807 2.124836 5.214766 10.87267 9.64075 10.14844259  
12.872189122 2.278411 5.132648927 8.620152964 2.169657 11.677643182 6.072428  
1.748885 1.26287601 10.708319796 1.792962721 5.719575692 1.752401 4.589437  
7.908119 3.903015 17.00542 12.28247 7.222370254 5.800544 8.474998 4.102014101  
7.085825 5.66066 3.463312701 12.34272 3.193994 2.055144044 10.36798 4.345784  
2.824688048 10.33472 11.13299 3.054864 7.202176343 11.50179 6.125611 1.83162776  
1.689878 7.026459139 8.756363 2.558548 5.977771381 3.33001 11.893375206  
5.472884 19.03507 1.678535 2.882071 0.8377709 5.216279805 4.339147 1.201765  
23.16082 13.92325 2.521972 0.996453 12.83109 10.87929 12.545964964 0.922613074  
8.717905 4.050482 11.22061 5.501625 8.14744505 3.623761 12.471280423 8.776902  
6.593778 1.80967591 9.182427544 4.029829 1.40144 5.579516555 2.215738  
1.491956 6.702087 7.3912 4.808252 5.791757 3.451342 1.191321 0.7828942  
10.94759 8.245619 1.262774 1.393448 7.817240501 9.711848 5.448279 1.55066603  
3.022163 2.443439 7.812119 4.918226 2.283597 9.467499669 10.72233 3.186328  
6.958139 0.05622225 8.916835 1.940118505 1.031875 2.835979 2.591812 9.794737536  
0.903801019 11.84974 2.344329 3.083698 8.443028554 9.408386 4.678088 4.624246058  
7.167573 8.030642 0.6737911 2.272858 2.264285 3.282265 12.762239447 3.632249  
1.005683702 3.915085 22.03969 10.35805 1.395268 7.369515 3.514138 4.798221  
5.633575073 10.142 9.966495 0.508804155 8.968948 0.6776232 4.356562  
3.892988 4.732449 0.7568901 5.42822 13.80659 15.101428266 1.384012 4.029918821  
9.588229 8.662666 4.417966 10.637323221 6.583136767 10.10418 10.67274 10.47526  
4.098235 3.097933 2.2634239 1.623422 13.23082 1.351638 3.454191239 2.425508  
0.4566242 1.779956746 0.3381524 2.225796182 1.069929 15.76986 7.389923916  
3.481955 6.683619 11.98783193 11.004914139 0.7102749 1.443107 9.980142  
8.169925 7.917382 7.771783 8.032145 4.524308 2.052626 7.87683954 0.94778  
2.182699272 2.213252 2.53331209 10.32203 1.058028 3.590582716 7.435448 1.57652  
2.202421 1.791051369 1.441369 1.12082 1.238625154 9.747178374 1.758882  
2.777079 3.609455 7.282124228 8.73147119 13.670550767 1.294869 1.938103  
0.2675109 1.376011 1.921087 2.963359 2.013027 1.237954 9.809243 2.061544 3.02172  
3.021285986 5.145592 2.524185 9.317959 3.589525 19.39557 3.148759 2.924913  
3.348245 6.214722 3.885941 11.479073336 14.59859 2.226915 10.63877 2.192151  
7.918775406 4.996438 18.0508 6.217026 0.818773 15.58786 1.403501 2.852487  
5.070524976 1.370649 2.190896 2.518623148 1.825498 12.90583 8.271768 2.179203

5.644975 3.475366251 4.606102558 5.398164 17.66316 5.564277 0.915404601  
11.381102031 2.854169492 3.452356 3.170191 6.042751 1.909969 7.650051 1.008528  
2.188739 12.306538558 8.889564965 1.652278 7.5091875 16.25206 3.145972745  
12.68688 8.312593 4.597125 23.41191 7.438703 3.364852 10.24133 1.994525 3.056573  
6.619060781 12.5822 1.032474 2.150729 4.508232 8.57279536 3.424929 2.320731  
7.720042 4.606022936 3.930122 3.2771 3.422762 1.548108 10.3523 2.720194  
2.003462 7.729180641 7.578229938 12.429493985 0.7356375 4.028244912  
1.150829162 10.01973 1.147398 6.556409096 3.810487 1.74103 2.472897 7.406188421  
1.22513 0.9207259 1.327981 1.618614822 3.073848 3.595234 1.034715 3.481315  
3.482387 6.033658 3.04807 1.808955 13.06661 3.993647 8.785161 1.443541326  
4.284953 14.55401 4.3727 4.285304 3.031814 2.222936 2.123027 0.95532818  
1.808889283 2.595324579 1.629243 6.835835 1.491371 6.318161 13.03147 7.709811616  
2.108216 15.70033 1.421999 1.688445 3.108918 1.444423017 1.576828 11.35503  
6.017839 5.722973 3.524772 8.276999 6.65511 8.849093892 1.900386 6.785028  
1.58270725 1.193226 6.581224 7.93429 6.568612 5.095758 9.047051361  
12.470558277 2.713476101 0.2235694 11.06831 2.506645 1.865341 4.806775  
2.766824 7.33084294 4.820399 3.991252682 0.2932668 5.667854 2.697758  
6.731661 2.747757 7.117762773 4.915749 3.407057 2.096789 3.965667 4.892883  
6.822255 6.606392 8.926379765 11.77396 2.016525227 1.006449 0.1748254  
7.795300211 23.7857 3.35183 2.893169 5.383766547 1.776595 14.20572 16.22681  
2.939719778 3.127044 1.703524 0.3163647 0.9503214 4.406416 11.33202  
2.142083

AP006621.3 1.791331 1.665633737 1.202962 2.961452987 3.058243339 2.014717269  
2.484915 2.253971339 0.4522283 1.374244 1.062826565 4.596574 1.605774 6.17351  
3.775557 5.690942 2.130611 1.94645712 0.8473956 0.8818491 2.091304214  
1.185495 8.772523662 4.148633 5.142156 2.445192902 1.466371 1.296776 0.545061  
2.982494 1.221564 1.761644833 0.9418316 4.036111996 1.800619 4.450843456  
2.656671028 3.278982534 2.007771 5.21962 2.1765629 4.863705 1.795590465  
5.257726 1.882648581 3.98461 7.337373 9.523221 3.01829187 1.716941 3.388184  
8.931223 3.016427966 4.224569 2.494149295 3.954476 3.024113 7.569743 1.162115  
4.188415 1.626534 6.967534 10.840834165 1.666859 0.9914554 4.050469 1.893057  
3.11225 4.191633 0.8314406 1.801051 2.513107418 1.385283 1.138492 3.071825692  
0.9605291 5.804209543 3.371572 0.8340848 17.08672 1.165544 0.7834951  
3.400943 1.297437237 5.774098037 3.206672 2.416646 4.066131 1.958314559  
1.733374 1.345002 2.400262 3.686704292 3.330539 2.660695 1.855561189 1.146879  
9.886766962 1.190411214 1.812701 0.837594432 1.04806 4.151616 2.176236891  
2.028685 1.647223 0.742038005 2.287838 4.230095205 1.174082716 2.485137  
2.994151254 1.965906 3.88538 5.107157 1.932061 1.95663 2.367797162 6.622132  
4.348667 0.8897595 1.725251 2.000855 4.537326 2.556835 3.166304 1.479783  
3.633876 4.545287 4.655272818 1.85648586 1.121861 8.63130107 2.670700838  
1.377133 3.433939752 2.335365 1.308469 0.733089078 7.849145407 0.583505  
2.410036656 1.79856 2.133237 3.410244 2.694373 8.35151 2.017064 1.776003919  
1.03585 3.853868 1.693052034 4.055552 1.675703 1.851460589 2.91024 1.606293  
2.22984731 4.520071 8.279123 1.096440235 3.257905 3.821534 1.493376 2.895171905

2.94555 5.69852 1.306210707 1.286899 1.376117658 6.14435 1.49601 2.511518015  
4.771376 4.429314221 3.128268 5.19079 3.073654 1.484707 3.465872 4.133275865  
0.9613626 2.602455 5.999138 3.908531 2.555952 0.7004609 4.052092 2.286526  
5.332563502 0.803353887 5.031249 2.113907 3.420952 2.355757 2.057745856  
4.556905 2.233182638 4.791049 2.778929 1.399188574 2.298913194 1.195577  
2.468951 1.630470233 1.817157 2.572076 5.742345 3.998026 2.757397 7.821573  
1.030486 0.9141688 0.6734516 3.719503 5.513374 2.954665 0.7079882  
4.935984051 4.457675 1.962228 0.674605143 2.313281 2.506166 3.251635 3.909542  
2.041881 3.499005917 7.142637 0.835164 4.820727 1.65991 4.460537 2.555430362  
3.701746 2.572763 1.069736 2.071557472 0.658861555 6.378566 1.372372 2.232153  
1.61523097 2.332626 4.139286 1.730261822 3.815688 6.716231 0.8288776  
2.471973 0.9781573 0.9610175 2.74643247 1.912352 1.44470321 1.52682  
9.643952 3.393668 2.034272 3.719285 2.212438 2.692168 5.186857434 2.827895  
4.036373 1.612044718 1.25736 0.8115391 1.768021 1.676103 4.35684 1.77353  
2.261209 11.63396 5.329957209 2.157024 1.454895105 2.88387 4.797755 1.932391  
4.612050303 3.205914945 0.2946337 2.665845 2.216484 7.073513 1.407809  
1.03125782 1.081043 1.780639 0.671816 1.625299427 1.270872 0.5658863  
1.691929482 1.340396 1.248140228 1.520937 3.345415 2.693588887 3.116479  
1.490775 16.82258454 7.060590545 2.186195 1.119447 2.708933 1.898658 4.342379  
4.691783 4.174844 7.538682 2.00825 2.510132953 4.404626 0.91344663 1.97198  
1.721554254 2.524505 1.46224 2.245537332 3.65013 1.069456 1.605542 1.17125189  
1.383478 0.6913634 0.790076763 4.056738575 1.043657 2.935469 2.125978  
4.229749844 4.918526392 7.697234895 1.11783 1.970564 0.09750633 0.5228913  
1.050339 1.486629 2.498203 2.361425 1.90515 1.194884 1.584943 1.590684406  
1.696919 1.380079 1.784705 1.521352 3.57496 1.652697 1.227937 1.234609 4.069519  
2.491508 7.070741471 5.321109 3.455519 1.885031 0.6877705 5.365428283  
5.740161 4.344565 3.214376 0.9521609 6.442235 1.968765 1.269549 2.701186183  
1.593944 1.247766 1.542792109 1.48733 2.257971 4.217538 1.234014 2.069597  
1.977081705 4.535976682 2.425185 5.094345 3.191213 1.793423699 2.68741102  
2.990948625 2.777613 3.192879 1.061661 2.716776 1.267456 1.198706 1.660693  
4.33158151 5.355702911 2.803563 2.232353774 2.677878 1.69273393 2.615938  
3.792524 1.702438 3.025736 3.570129 1.934864 3.081639 2.116836 1.830316 2.782429912  
8.740656 0.5017751 1.893264 1.411242 8.11564257 1.946276 1.464841 1.833787  
1.865412709 3.025673 1.981761 1.969862 1.145654 3.648044 1.175486 2.921006  
7.947992595 5.645867412 4.530486004 0.998062 1.586411366 1.403615345  
3.551804 0.286151 3.068976861 3.136841 1.332653 0.9423289 4.131914104  
2.996229 1.342399 1.108613 1.632268859 2.339084 3.083398 1.441245 1.965934  
1.399977 4.514224 1.869103 0.3732197 8.433968 5.40675 2.334165 1.179881376  
2.049138 6.400197 1.368285 2.784383 3.035796 1.607429 1.966295 2.6115912  
0.802663521 1.07875178 1.157247 2.364933 1.909218 4.33494 2.04212 3.526508289  
0.9221205 7.794402 0.9286407 1.471679 4.374953 0.89614415 3.65374 6.89808  
4.215577 1.730602 2.555087 5.640335 5.862236 3.070005451 0.9380053 2.027137  
1.05762905 1.612403 2.640905 1.999413 4.130038 1.989003 3.827871091 5.610794442  
2.921141608 1.303838 3.165589 1.656768 0.9317245 2.566126 1.401412 1.838100963

2.091679 1.198063072 1.656861 3.254255 2.595962 3.27952 1.206679 2.421428393  
2.575662 1.160153 1.463494 1.956488 3.6155 3.490072 3.644534 3.149918059  
1.683836 1.707126904 3.597908 4.141992 2.933855395 9.802141 4.29349 1.391102  
5.430416201 2.040424 4.626312 7.405258 2.126790143 1.556788 1.720851 3.036584  
1.807238 3.265769 1.666428 1.586343  
AC124319.2 0.04365892 1.576771568 1.135855 0.892376569 1.106754436 1.153232334  
0.8981919 0.464752313 0.5450809 0.4697793 0.7004907 1.330291  
1.255924 0.7909399 1.837748 1.008738 0.978075 0.887752707 0.7668294  
0.4114215 0.643831092 0.9455983 2.373647664 2.984692 0.8804746  
0.539728793 1.020465 0.2937073 0.622307 5.33882 0.3119688 0.641570891  
1.380573 1.761151417 1.251184 1.582976519 0.694776065 2.992542478 1.071759  
1.643873 1.360139927 1.102551 0.292208809 0.3017102 0.706433488 2.407339  
2.28512 0.6352141 0.565820378 0.4405757 0.9940418 0.7306564  
2.163997478 0.9107256 0.517346687 1.391268 0.4623293 1.947719 0.383139  
0.3951539 0.4015726 0.9854684 1.130088627 0.4792575 0.2108865  
0.9722362 0.3194184 0.6181214 1.594368 0.1375506 1.257815 1.353144469  
0.5324612 0.3171165 1.276611412 0.9364134 0.059717394 1.933178  
1.219716 0.1881723 0.8029093 0.1767527 1.746391 0.318427015 2.761010649  
0.184899 0.2743811 0.6359428 0.49264022 0.5903701 0.357609 1.011586  
1.26150168 1.741628 1.003122 0.469290415 0.4548141 0.707271794 0.35350079  
0.3855686 0.148466399 0.2533255 0.4090091 0.760469165 1.462941  
0.8443214 0.192101135 1.158029 2.280350323 0.362398565 0.6229911  
1.078957714 0.9612275 1.111871 1.246909 0.6647834 0.5122864 0.707547217  
1.41952 0.915706 0.4870543 1.331377 0.6404846 0.8521551 1.254458  
0.5026915 0.3629187 1.407255 1.249123 3.024109396 2.144926974 0.9878121  
1.203969511 0.764386599 0.5764176 1.251979841 0.4541107 0.1739479  
0.203979471 2.423348493 0.139628073 0.963136367 0.4782011 0.9385074  
2.60141 0.8138075 2.038349 1.172877 0.994642266 0.5357323 1.124342  
0.461840831 0.7945296 0.7728686 0.786880258 1.703724 0.6386628  
0.29643589 0.7749289 0.4099272 0.270190676 1.952843 2.3621 0.616486  
1.176588817 1.500026 0.4740295 0.165929972 0.4094232 0.747009388  
1.515673 0.2479537 1.547793607 0.4933497 2.099753458 1.211453 2.316154  
0.4647714 0.6554402 0.1502014 0.690143957 0.4947234 0.2329305  
2.209212 1.376532 0.274215 0.3448862 1.305184 1.17337 1.429940066 0.173856984  
1.267303 0.5575849 1.956322 0.7039951 0.829995969 0.7023709 0.852962829  
1.192448 0.9651795 0.233838782 0.876403149 0.7129595 0.2308875  
0.657256201 0.2391327 0.3985947 0.4259786 1.789102 1.804883 1.469853  
0.5123887 0.4253536 0.6494621 1.905872 3.154057 0.52504 0.8307109  
0.929761492 4.716425 1.150292 0.21329774 0.4853497 0.4130203 1.973311  
1.992738 0.7296238 4.352853079 2.17678 0.6453427 1.425866 0.005448603  
0.6972774 0.854638741 0.4105303 0.7756596 0.3841536 1.277354023  
0.700712414 1.394039 0.4784828 0.9849324 1.121110351 2.480794 1.13012  
0.337099738 1.434945 1.427614 0.277518 0.4760609 0.7192629 0.4849576  
1.684073191 0.4823814 0.361185277 0.7402636 2.20902 1.347823 0.3615013

1.208635 0.4674984 1.076303 0.489237175 2.151466 3.293354 0.546193827  
1.244364 0.35962 0.8444053 0.5140079 0.4397179 0.4610675 1.155451  
1.315471 1.355290614 0.3700061 0.714143069 1.546523 1.653591 0.7391279  
1.284446893 0.674589777 0.718091 0.8978069 1.578686 0.1518582 1.173613  
0.296126084 0.4538332 7.614434 0.1548061 0.73036833 0.3929918  
0.1371822 0.196175272 0.2334933 0.86282433 0.1451644 1.301874  
0.817108293 1.361019 1.085982 0.98749878 1.746677065 0.2600398 0.2832944  
1.312915 0.7651935 0.9012019 1.145458 0.890816 0.3721376 0.5234838  
1.103599434 0.4225152 0.720767117 0.2526221 0.374503768 2.030968  
0.6536638 0.879082371 0.4206873 0.6365978 0.2602936 0.107207562  
0.3678391 0.1545757 0.18005623 1.507368091 0.1268514 0.3061375  
1.254714 1.033544644 1.321116139 1.809410072 0.2245577 1.191207 0.04536872  
0.12484 0.8238293 0.4662891 0.3297886 0.2919329 0.5481747  
0.229265 1.192789 0.676689846 1.217838 1.31689 1.04969 0.8049494 8.340996  
1.672234 0.7314249 0.5244578 0.8543977 0.512712 0.974479174 2.312954  
0.4439614 1.528635 0.7260793 1.304148927 0.7477737 7.610567 2.223369  
0.132248 1.645457 0.527577 0.5790687 0.449394591 0.1960856 0.5075866  
0.759373978 0.4578909 1.170681 0.7923652 0.4223812 1.279685 0.302179524  
0.415060701 0.8881318 1.679774 0.3833492 0.255051533 0.77207476  
0.484055107 0.5426632 0.6670106 1.428225 1.232486 1.996025 0.4929411  
0.7878551 1.543161295 0.975422352 0.380988 1.212882406 7.109153 0.493618669  
1.960933 0.5041781 0.7163898 2.262607 1.103154 0.466652 1.000954 0.972151  
0.4919339 0.83811928 2.359829 0.2096473 0.3106804 0.7555821  
1.026968128 0.5671325 0.1481091 1.106834 1.360391074 1.139067 0.7831479  
0.9369248 0.5319246 1.636314 0.3913521 0.6395835 2.624153167  
2.586612775 1.488333425 0.2653647 0.700000276 0.343166192 0.5815511  
0.1755734 0.97984428 0.487351 0.6209136 2.487308 1.225541837 1.309856  
0.4015317 0.4400611 0.313725996 0.3553804 0.9427859 0.2041336  
0.3753955 0.7841556 0.4000806 0.7854009 0.6615443 2.765655  
0.7345705 0.9979621 0.85633491 0.7042858 0.1427587 1.303282  
1.286517 0.4457941 0.7887478 0.5733919 0.435138434 0.381093159  
0.463322212 0.6923 0.9431827 0.5040978 1.267831 1.145913 1.118316715  
1.076039 1.449308 0.6172675 0.2561171 0.1945044 0.696930383 0.4438864  
2.468431 1.002375 1.17909 0.3070492 4.219951 2.182112 0.852416127 1.108857  
0.5497547 0.298244971 0.4597305 0.7138665 0.9935928 2.056142  
0.8126965 1.176365391 1.420984775 0.801135246 0.1299992 1.73396  
0.7579217 0.5657547 0.5881737 0.3517136 1.488768457 0.6896082  
0.233217516 0.1847368 1.215226 0.2143847 0.7319361 0.1860824  
1.34893389 0.9155706 0.6299568 0.3545258 2.282629 0.4483142  
1.136727 0.9586263 0.820267668 1.588734 0.724964606 0.1763167 0.07341819  
2.923443534 1.5242 0.6543048 0.429522 1.489779337 0.5977331 1.854528  
1.368009 0.820148694 0.4028317 0.5377274 0.0306595 0.1081144  
1.527833 0.719515 0.4481378  
AC009120.2 1.716543 2.386938134 0.6588493 1.534638052 2.871895645 1.100532141

1.705866 0.896353783 0.1258887 0.2235706 0.6250639 1.001704 0.6447204  
3.200442 4.106036 2.923822 0.7217803 1.235980516 0.5395936 0.5771905  
0.737386938 1.55205 4.440685172 2.247037 2.015033 1.904221207 1.44167  
0.6016486 0.6591028 3.380779 2.292254 0.950995368 2.193251 2.921560222  
1.355989 2.383930726 2.149634524 2.950667523 1.77099 3.033753 1.424946507  
2.74067 0.427587268 1.931778 1.375224806 1.147669 4.529995 1.545422 0.518246649  
0.3078046 2.038977 6.486798 1.788701458 1.320262 0.835213837 2.655835  
0.7576517 2.990242 0.1231799 1.735901 0.4925904 2.796321 6.204865653  
0.7221631 0.2302686 1.686501 0.3157193 1.718288 2.443566 0.261125  
0.9564527 3.620636702 0.2853512 0.2553988 1.711123424 1.748297  
0.561953421 2.735632 0.4241892 3.263736 0.68068 0.3584241 2.888026  
0.443452248 4.025589507 0.7942064 0.4783252 2.883243 1.833814166  
0.970882 0.452786 0.3895843 2.600032997 2.55537 2.184024 2.136907735  
1.292448 2.4778539 0.665408119 0.3493448 0.453668964 0.2815517  
0.8453461 0.778896485 3.783122 1.799996 0.740119033 1.807667 4.082366216  
1.144353973 0.6522668 2.753363979 0.8026922 3.658761 6.041178 0.5658229  
1.232956 1.635495445 1.317437 2.615056 0.5757863 0.3649296 0.6849581  
1.509876 2.309505 2.092574 1.573433 2.533173 3.459716 4.291854033 3.657339083  
0.9078775 2.588013008 1.57437407 0.6043807 2.48336787 1.438667  
0.1724233 0.416177789 4.277695849 0.446065415 1.695435501 2.208216 1.71053  
2.777556 3.094797 3.3741 1.722421 2.047162592 1.371884 2.100038 1.490181093  
2.310486 1.233919 0.491070733 1.783786 0.9656185 0.895286738 1.547055  
1.553498 1.168199534 2.214347 3.144629 0.391313 2.168236112 2.137516 2.799076  
0.344968518 0.1943115 0.976106508 3.930698 0.6115708 1.202039894  
0.9634586 3.226805961 3.094503 8.612942 0.2807377 0.8143111 0.4904149  
2.092317648 0.4980495 0.3103631 5.289715 2.977525 2.383707 0.1249938  
1.55955 2.43442 2.552158375 0.132019516 3.640349 0.7975429 2.848321  
0.7379112 2.380922937 2.001074 2.985718657 1.268478 2.541081 0.465471644  
1.558269514 0.7076952 0.4867563 1.053048916 1.585939 0.6231559  
1.584594 2.714538 1.523668 2.604985 2.175099 0.18352 0.1503195 2.719991  
6.661659 0.3052194 0.4449259 2.306519796 5.259796 1.625033 0.386517242  
1.202999 2.428255 2.932661 2.542126 0.9399189 4.856418435 3.803865 1.043682  
1.753635 0.04607598 1.087146 0.412984665 0.3560656 4.286817 0.7005878  
1.165606177 0.256975705 2.520778 0.5697227 1.825477 2.195402193 2.538476  
2.055831 1.446897586 0.8777969 2.624475 0.1429788 2.008607 0.5743698  
0.9449384 2.817389265 1.181249 0.235483111 0.8910834 5.56441 2.377671  
0.546731 2.181874 0.5535492 1.136138 1.683155626 4.426707 4.5215 0.224528634  
1.453915 0.211556 1.609022 1.456036 1.336591 0.7468875 0.7830453 6.747198  
2.403008717 0.2681955 0.70995765 2.496306 1.962526 1.154258 2.731793908  
2.173200755 10.53621 3.171379 2.795783 0.6491486 0.6971261 0.635982985  
0.48247 9.889851 0.445962 1.639671732 0.4392647 0.1550334 0.849906137  
0.1336148 0.634764673 0.2964562 2.681493 1.480683499 2.418746 1.6117  
0.63157004 2.938369909 0.3141458 0.3552353 2.003744 2.388048 2.417905  
3.611127 2.824512 4.063912 0.6640241 1.686290082 0.08876993 0.548942038

2.406928 0.769124193 1.417721 0.5058019 1.46023794 1.368669 0.4255429  
0.8427322 0.912765461 0.3881247 0.3633818 0.276431869 1.958589963  
0.584247 0.9062988 0.9217167 3.1462322 2.040453208 6.003413813  
0.5106466 0.5851776 0.8142976 0.2982027 0.5229237 0.7498351  
0.5386912 0.5942328 2.648929 0.4827151 1.052685 0.864650038 1.200754  
2.201638 2.032429 0.7427633 8.81209 0.9879673 0.9080707 0.7794409  
1.493263 1.51833 2.750359122 3.943092 0.8640961 1.781823 0.6140072  
3.566205123 1.880769 6.454808 2.32996 0.3423528 4.057077 0.2639023  
0.544879 1.36485873 0.2598091 0.3887602 0.38087459 0.5657352  
1.099982 2.300713 0.455594 1.283135 0.269987407 1.513725364 1.58244 2.480232  
3.149161 0.274628322 2.184068164 2.492240255 1.24214 0.9327677 1.073917  
1.003526 3.350815 0.3850256 0.4183659 3.503018374 4.317846633 0.4869411  
1.876759786 7.428458 1.052338038 2.845981 3.866343 0.7664162 4.58601  
2.587889 1.956135 3.234791 0.343399 0.6454112 2.62459405 3.50072 1.122439  
0.636624 0.7823953 2.272196687 1.04191 1.398272 2.372984 1.245423045  
0.9890504 0.6845026 0.5483588 0.3185543 2.110949 0.6533556  
1.062408 4.536498245 4.757891846 3.826888399 0.468906 0.672181658 0.202101936  
2.223678 1.293838 2.541156698 1.924069 0.5299661 0.7764325 3.037756848  
0.5274649 0.5524495 0.2708272 0.505336424 0.6061039 1.703472  
0.4932145 0.7520118 1.247096 3.703009 0.9362227 0.4795143 4.398141  
2.528645 2.252976 0.338008463 1.657504 2.110938 0.7775675 1.270627 0.5099901  
0.4827269 0.3422735 0.205051231 0.53865212 0.405134076 0.4793091  
2.129647 0.579174 0.948564 1.938802 3.303761746 0.7075557 3.834445 0.3572428  
0.4297318 0.6358134 0.233872014 2.228493 4.029914 1.071496 2.094444  
3.092682 8.578102 1.668689 2.29047279 0.9224058 1.862199 0.561038864  
0.2657674 2.75685 2.39301 2.6493 1.282437 2.757097324 2.948525116  
1.285509087 0.219867 2.568734 0.6691076 0.6389839 2.921797 0.7446161  
1.082400067 0.8277187 0.556613438 0.1087261 1.556161 1.958227 1.82228  
0.1511587 2.074041184 1.573679 1.648025 1.143851 1.392855 0.656162 3.194893  
1.981706 1.361500322 2.646814 0.795841558 0.1858107 0.1500978 1.311659842  
5.478545 1.620131 0.972922 2.430065206 0.3649756 2.577598 3.794397 1.564413701  
0.7723863 0.5812311 0.2057709 0.3434546 1.582051 2.57107 0.7563409  
AC145098.1 0.1457004 0.446626355 0.8655487 1.059845341 0.829155068  
1.596948325 0.951125 1.982956352 0 0.3048437 0.949693861 2.580687  
0.4244756 1.482978 0.7616805 1.165527 1.177873 0.548023243 0.6166895  
1.948794 0.4604188 2.013917 3.630660002 1.654093 1.304923 1.688630956  
0.9022988 0.5273756 1.251764 0.3808025 0.07844024 0.650204736  
1.481706 2.49746277 0.5907465 1.297614388 0.814743223 1.428753499  
0.6783434 1.17508 0.913359109 1.646412 0.79318561 0.06153158 0.740941299  
0.3651762 5.187101 0.7287032 0.746672938 1.169161 1.457104 0.6286444  
2.700251239 0.3343244 0.906418704 1.851883 0.3689557 0.6703138  
1.332764 0.439575 0.7937784 0.6309807 0.291328574 1.040469 0.2233147  
1.784524 0.6218198 1.433439 1.019157 1.036938 0.7617534 1.205916506  
1.359436 0.6173387 0.70903736 0.9233071 0.7499653 1.359235 0.2374451



0.2467051 0.2585486 0.2896667 1.282189 0.243528187 1.092196231  
2.026848 1.115618 0.8582815 1.323268065 0.9088382 1.104495 0.7165309  
1.760067051 0.998978 2.507623 0.331298072 1.138369 3.245464925 1.16942994  
0.4655954 1.923583635 1.580915 0.9497181 0.834462921 2.350444 1.201669  
1.62004732 0.7164752 1.941260133 2.337997387 0.6930243 4.042408868  
0.7723971 0.913801 0.7189577 0.693295 2.988529 2.096313058 0.7827701  
0.6914533 0.6704853 0.4107093 0.7387645 1.410772 2.37837 0.1667498  
1.276233 0.5461554 1.491216 1.596441422 0.933453845 0.7821272 4.409358277  
1.380018958 0.332706 1.505232842 1.233259 0.3683983 0.2912008 2.040854892  
3.616467187 2.525458953 0.2050772 1.273237 1.22178 1.840865 1.034843  
0.640237 2.428052814 1.55809 2.049076 4.023899031 2.968776 0.6953862  
1.095208359 1.661303 1.15068 2.933056826 0.6629688 0.1546058 0.71779433  
1.916418 0.7209971 0.6712585 3.184509361 1.559174 1.585648 2.301920481  
1.154073 0.886100339 1.457632 1.137787 0.527605037 0.5787256 1.011806674  
1.770032 2.131902 0.2488151 0.5810184 1.005904 0.363080666 0.4161927  
1.131724 1.257041 0.8987914 0 1.266066 0.5662433 0.6242612 1.037990028  
0.957335071 4.135313 1.146251 0.2331687 0.760101 0.998512125 0.6445952  
2.102218431 0.8217037 0.549798 0.82915049 1.608623845 1.041899 0.2077403  
2.138977227 0.761399 0.4303613 1.354737 1.530871 1.853134 1.111769 2.351203  
0.5018976 0.7520114 1.542027 1.26275 1.8477 0.262889 1.193891267  
0.4478821 1.038365 4.359937161 0.7295767 0.5053947 1.972365 0.04653484  
0.4125537 1.253269274 0.9454243 1.401041 0.6141335 0 0.3828585  
1.058856047 0.1932107 0.7286708 1.72887 1.433983307 2.411524378  
0.9778612 0.4738746 1.545152 1.410574977 1.316765 0.3316497 0.727930744  
2.474447 1.051651 0.7865424 1.07595 0.7085794 1.148557 1.256540317  
0.8375437 0.683995773 0.462654 2.108786 1.449151 0.3798834 1.260472  
0.8239896 0.4315492 0.943537006 1.330183 0.9849122 0.52215102  
0.6477044 0.6026787 1.717664 1.440741 2.126218 1.202105 0.5172712  
1.034797 0.94586086 0.5942477 1.399550039 0.3578089 1.000595 0.2895305  
1.716685599 0.527914156 0.3594667 2.216487 1.77649 0 1.216628 1.258182064  
0.9718375 2.262981 1.967152 0.893719526 0.6067263 1.177754 0.993314617  
1.09023 0.862913538 1.110196 0.6307866 1.896792088 1.066694 0.975949 0  
0.898877827 1.40382 0.8227569 0.982064 0.8778127 1.660785 3.060102  
0.8252762 0.4734028 0.1921692 1.040842154 0.6322173 0.611148345  
0.1312312 1.260225314 1.192263 1.137055 0.571462619 1.567265 0.934772  
1.146635 1.780370119 2.222055 2.530486 1.273764722 0.737799951 1.455211  
1.265842 0.7909319 2.005696413 0.95153808 1.419291882 0.7879761  
0.317533 0.1784433 1.718563 0.6834465 0.7651784 1.108335 1.137738  
1.974123 1.052031 1.34376 0.65685511 0.9028459 0.7109207 0.580646  
0.4083464 2.254318 0.1120204 1.347164 0.8310508 0.417767 2.123664  
0.949720782 0.7542571 1.641086 0.9527843 1.258668 1.296251438 0.3375065  
2.530313 2.404099 1.005634 1.382747 0.3782653 0.8545699 0.809438644  
1.073931 1.309205 0.902248704 0.2387646 1.469242 1.828598 1.52286 0.3229655  
0.577755878 1.257750132 3.051882 0.8809137 1.266536 1.984519134 0.57213354

2.538500977 1.834828 1.187188 1.043954 0.4971887 0.9516031 1.20898  
0.8740136 2.757249941 1.241498828 0.5067372 2.32095912 2.871118  
0.999296807 0.6589036 1.408234 1.144832 1.672728 0.7534222 0.799774 3.44966  
1.04349 0.8252647 2.105568899 0.6582718 0.1311833 1.335393 0.8490972  
2.012060969 0.9833978 0.8558297 1.980144 0.780304961 0.6206881  
0.6955429 0.5340715 0.375515 0.7814349 0.8230756 0.05240827  
0.637356062 0.333300891 1.488146612 0.9087176 2.264940926 1.023548517  
0.7344686 0.05371037 2.332510517 1.544669 1.486535 0.4998629 2.240500275  
0.4217928 0.05118091 1.56211 1.343624347 0.3837029 0.4514265  
1.906286 1.395509 0.5010239 1.581659 0.6059784 0.8803341 0.9281022  
0.6161551 2.203816 0.894830323 0 1.152938 0.4035842 1.28426 1.704683  
0.5739914 0.3714535 0.396512556 1.538878761 0.971909083 2.006377  
0.3091423 0.6146855 1.123876 1.128737 3.585418853 0.8750229 0.8287172  
0.553318 0.6529151 0.8750237 0.574002009 0.5008686 1.742602 0.3902698  
2.790084 0.140896 3.616772 0.4439296 0.758592025 0.5634017 1.780705  
2.58071236 0.5953387 0.9666078 1.858572 1.285268 0.7851006 1.253467992  
1.992972645 0.056124841 0 1.655213 0.4161569 1.781927 1.640967 1.342263  
1.162812975 0.6124668 1.461692159 0.3477757 1.115264 0.2879266  
0.9345788 0.6183255 1.125430181 1.229645 1.236019 0.7142119 1.63884  
0.7912245 2.501604 1.492753 1.201940059 1.563493 0.867822288 0.8951368  
0.2073198 1.451123831 0.7339498 0.6813991 1.149722 0.903457911  
0.5068261 0.9986095 0.625784 1.5053697 1.5941 0.9956478 0.1875834  
1.139205 1.219266 1.390166 0.6350567  
AL360181.2 0.404051 1.145675082 1.200154 2.772128149 3.377217467 1.736705063  
1.291337 0.881924888 0.2550105 0.2415375 0.5571195 13.14349 1.833622  
3.517304 3.470148 4.663598 0.9855619 1.671733521 0.955689 1.154048 0.984212604  
1.116984 4.195171568 2.798112 1.844178 1.326807156 2.372796 0.934374 9.275  
2.522732 1.44112 1.327299374 2.955973 5.455757027 1.919808 5.397744196  
2.996181703 3.389853349 1.515376 3.968243 2.063839256 3.471887 0.471349915  
0.9385041 1.720853921 3.797599 3.402827 0.9542727 0.70590195 0.540379  
3.513728 6.004815 3.804507337 1.429335 1.256823378 4.324694 1.074333 4.182501  
0.4128478 2.247555 0.3144681 1.749812 4.807014547 0.8525018 1.341791  
3.775027 0.6774459 2.473903 3.507626 3.000624 1.909345 4.233618645 0.6368136  
0.03057109 1.849235884 1.296654 0.259971997 2.479855 0.8936432 0.9834706  
1.030684 0.6426344 3.210025 0.168835836 2.044465725 0.6862578 0.4419702  
1.404291 1.962236963 0.7270259 0.6125889 1.015127 2.874338822 2.75161  
1.809958 1.55675988 0.328842 1.650037226 0.993828639 0.7424239 1.083552203  
0.451308 1.442277 0.157779658 5.086144 1.465117 1.288334944 3.911714 4.989521096  
1.027338545 0.4083972 2.802564615 2.001063 8.975005 1.578415 0.96131  
1.996118 2.126860127 1.434245 3.189709 0.597653 0.403383 0.8684768 3.040538  
2.628685 1.348738 2.481758 3.385527 4.2 4.129208096 2.607653577 1.183073  
3.88414661 8.2918711 0.7381184 4.139470466 2.122776 0.2837857  
0.37493266 4.752632261 0.493555747 3.101554063 1.393346 1.401973 5.379903  
2.880689 4.635814 2.663222 2.897912996 1.344261 4.540863 2.417767661 6.644095

1.909135 0.664385582 6.978346 0.7478961 3.38910187 2.047443 1.679259  
0.995280316 5.14231 6.031651 1.174524 3.222867081 3.111059 3.072445 0.343732338  
0.8931442 1.584312243 3.349293 0.8545522 1.969604452 1.227277 5.643694824  
3.604744 7.564025 0.1232152 0.6634595 0.4649227 1.034850787 0.6557785  
0.261538 5.706888 4.431102 0.872363 0.1755504 2.717801 3.570555 3.366835067  
0.063210622 3.583718 1.135264 4.267657 0.8892635 3.97554572 3.277207  
3.490205765 3.651128 2.075258 0.541028097 2.516448017 0.4334035 0.8353417  
2.313375626 1.304152 1.268053 2.093134 3.163206 3.122957 3.083115 1.652707  
0.5026103 0.2317167 2.871224 4.781318 0.6028205 0.3384801 2.288385083  
7.05307 2.799568 1.943166882 0.6655378 0.96356 2.486223 1.387273 1.584109  
2.878164919 4.588177 1.280387 3.50444 0.173337 1.402999 0.271887069 0.2344146  
2.253883 0.9165837 4.324627933 0.636909527 5.950825 0.9417942 1.928231  
2.185980316 3.15098 1.651313 1.74110336 3.750863 4.404977 0.3895018  
3.661919 0.672239 6.204381 3.833050142 1.05072 0.401252866 1.063552 7.642281  
2.260536 0.6847611 1.616666 1.398613 1.396216 2.097776835 5.85023 2.091169  
0.313735469 2.245237 0.3581414 2.132436 1.643274 1.444004 0.3666996  
1.314937 5.906718 3.83617594 0.4708417 1.041292275 1.860492 3.745998  
0.9176176 4.284583993 3.061074122 0 3.407399 4.926497 0 1.290023  
0.558263019 0.9817732 2.133709 0.681904 2.865684536 0.3037939 0.1970924  
0.817778787 0.1303183 1.020544051 0.6157507 4.501808 3.241697868  
2.290155 2.43992 3.32633611 2.354249416 0.2433139 1.003921 4.189882  
3.550047 2.901545 4.168203 2.002547 1.805132 0.5329165 3.552522939 0.1461035  
0.872330705 0.6975241 1.350267553 3.719631 0.4892958 1.794506465 1.5371  
1.377146 0.4968447 0.714602905 0.4740092 0.4518812 0.238672778  
2.941181755 1.462882 0.7919776 1.499887 2.752092089 4.532726125 4.919909558  
1.134616 0.660428 0.0412377 0.3791021 0.8884259 1.100278 1.270813  
0.3562248 1.677689 0.5626515 0.7498376 1.200577754 1.575629 1.478624  
2.799597 1.466987 4.824599 1.863904 1.64251 0.4561265 3.787522 1.789875  
3.347032478 4.930383 1.137749 2.59667 0.7186303 4.373571677 0.3509852  
5.292973 5.208562 0.8174027 5.095958 0.5507204 1.0183 1.817142344  
0.5835633 0.8654432 0.517672276 0.7614531 6.429988 2.977739 1.823628  
2.524065 0.961326713 1.445006222 4.128471 6.073364 3.983872 0.458616243  
5.309073044 2.969863662 1.661478 1.466087 1.581557 1.551134 2.408042 0.7570612  
0.9640043 5.358205 3.216373372 0.2810529 3.546586551 3.981039 1.154672029  
2.912175 2.440789 1.269923 6.47825 1.71393 1.234156 3.600862 0.6149255  
1.413543 2.055596474 6.25232 0.1515803 1.576389 0.8175989 3.083558714  
1.579736 1.291385 3.922329 0.8114673 1.789214 1.102202 0.2591868 0.3181946  
2.190601 0.968343 0.6903491 3.724358588 4.647163333 5.04805005 0.3780033  
1.627363016 0.409394252 4.990163 0.2234214 2.957605294 3.532388 0.8588342  
0.5544805 2.143578953 0.3411626 0.4612822 0.633949 0.299417886  
0.7648008 2.373354 0.5468734 0.6953858 0.9473324 3.17216 0.906573  
2.251898 5.483268 2.336897 3.035928 0.863134014 0.6552556 1.380646 1.704243  
2.872148 1.869457 0.729562 0.4506692 0.569432569 1.091137896 0.505361672  
0.5667048 1.393115 0.538302 2.887522 3.263776 3.604319624 1.011075 3.935613

0.6941519 0.7242559 1.771406 0.208450144 4.190121 8.539281 2.725031  
4.103936 1.489649 5.170279 5.505704 2.596753812 0.3906012 2.812021 0.731938896  
0.4127428 1.787041 2.476395 2.227662 2.152471 3.952629099 4.175165571  
0.856038303 0.05514235 4.207661 1.03042 0.8945955 1.946009 0.5317592  
2.130585435 1.755086 0.217152349 0.8438839 3.773227 1.164432 2.571491  
0.4695059 3.12100127 1.136669 1.022776 1.402943 2.469983 0.383984 2.25095  
2.378096 4.034896812 1.184788 0.822259308 1.742426 0.1077997 2.593375156  
11.88292 1.003866 0.9109617 3.841668527 0.2066929 4.063657 5.450244  
0.714082382 2.351436 0.2400951 0.1517248 0.9171875 5.343542 3.734684  
1.341803  
AC253536.3 0.3682983 0.104212816 0.4683162 1.573709748 0.241836895  
0.97417327 0.123294 0.494699803 0.1144348 0 0.113638582 0.437467  
0.4825236 2.155088 1.269467 0.5698133 0.9477139 1.165056819 0.7335783  
0.6315536 0.507313307 0.5411131 0.294150695 2.238539 1.093012 0.262675927  
1.693971 0.136727 0.4563722 0.2632709 1.616741 0.786667459 1.411148  
0.219902382 1.464559 2.610900448 0.330620438 0.765529652 0.7034672  
0.972916 1.026119493 1.307221 0.352526938 0.2632184 0.662730829 0.8520777  
0.3036654 0 0.290372809 0.7577895 1.231851 0.5976002 1.761454214  
0.4767219 0.201426379 1.061313 0.1721793 0.4344627 0.1764415  
0.5128375 0.5291856 0.0817938 0 0.9563909 0.2605338 0.9964862  
0.2072733 0.7116365 2.689442 0.3506554 1.321675 2.733980921 0.2571905  
0.2400762 0.551473502 0.8838495 0.112174297 0.8624383 0.8706321 0  
0.8546467 0.2252963 1.108065 0.599800906 0.169897192 0.5499199  
0.09916607 0.08010627 0.686138997 0.6796867 0.147266 0.3392272  
1.551466512 1.259972 0.6412188 0.057261395 0.9222897 0.168283366  
0.410767506 0.3621298 0.187015076 0.2893177 0.422097 0 1.495737  
0.5156586 0.222359436 1.416365 2.025434014 0.589072894 0.3773132  
0.346138986 0.5058975 0.1776835 0 0.1797431 0.2551184 1.948605363  
0.2174361 0.248214 0 0.1331002 0.4247004 1.741315 0.2680933 3.63144  
0.7989426 1.574213 0.7248966 0.573081536 1.708281547 0.4147644  
0.040347069 0.834826283 0.6986827 2.302448754 0.7938218 0.2546952 0  
0.366307288 0.597998511 0.869880306 0.957027 0.6116533 1.874863 0.08181622  
0.8977488 2.147462 0.717146401 0.8617585 2.276751 0.625939849 0.7291731  
1.103346 0.825209076 1.849511 1.062781 0.165309161 0.7500253 0.2805809  
0.253765672 1.821781 0.2243102 1.21821 1.964390832 0.5028231 0.6640748  
0.110177391 0.146123 0.43527736 0.06478362 0.3318546 0.56819004  
0.370687 1.216212063 0.1720864 1.170456 0.3870457 0.1860778 0.1159067  
0.188264049 0.6474108 0.2200575 1.103854 1.63114 1.531835 0.1477077  
1.795524 0.940727 1.614651155 0.31911169 0.3015333 0.4457641 0.1450827  
0.03694935 2.507374892 0.125338 0.473306489 1.249156 0 0.550057351  
1.347394332 0.09724395 0.09694547 0.698732561 0.1045058 0.02789379  
1.053684 1.821036 1.685244 2.450008 0.6857676 0.1734955 0.06498864  
1.028018 0.4155202 0.1408922 0.7302473 1.829852955 2.139881 0.358941  
0.380629435 0.08959714 1.100637 0.2440553 0.2895501 0.567702 0.335075465

0.6713883 0.3467222 0.4776594 0 0.8507967 0.091506078 0.03756875  
0.08719138 0.2900283 1.059554333 0.625210024 2.112663 0.8845659  
0.2704015 1.226186091 1.123262 0.3751996 0.339701014 1.109074 0.9883568  
0.1165248 0.3803865 0.4640988 0.1861088 2.866773463 0.5273423  
0.040922824 0.4734764 2.534803 1.24788 0.1969766 0.2450917 0.9944702  
0.2610606 0.05061118 1.196241 0.8139205 0.027074497 0.5833127  
0.2901786 1.025272 1.13865 0.0337495 1.645548 0.5364294 1.475544  
0.772453036 0.1320551 0.530994595 1.020418 2.386605 0.3538707 2.195662074  
0.335945372 16.02955 0.4871989 2.364268 0 1.168917 0.508864746 0.5831025  
14.50319 0.5383357 0.477891691 0.5243314 0.3790472 0.072429191  
0.1461994 0.394797044 0.1233551 2.4242 1.26942933 0.3746811 1.38013  
0 0.621446399 0.163779 0.3583563 0.6169376 1.744788 1.317556 1.232041  
0.2808232 0.3156018 0.1120987 0.373635645 0.1966898 0.447376567  
0.5103437 0.445534202 2.009183 0.09148721 0.261453486 0.1189253  
0.2120548 0.1114784 0.109320972 0.1661793 0.1789232 0.187430845  
1.243329548 0.1697746 0.3842123 0.7961014 0.584994787 1.599538923  
0.331168106 0.09428773 0.3528144 0 0.1822718 0.1993386 0.5510544  
0.06631066 0.1141816 1.040129 0.6312183 0.8921984 0.789553112  
0.4600709 0.08730605 2.196484 0.5485866 20.35421 2.178174 1.047794  
0.3231864 3.249299 0.4534185 1.354231485 1.298998 0.6602069 1.890967  
0.4606888 0.336065188 0 0.5768338 1.636123 0.1887971 0.8490551  
0.4118889 0.3946451 0.869397062 0.7901293 0.4736143 0.532361305  
0.4085528 1.571273 1.256866 0.3499501 1.484337 0.539238819 0.195650021  
0.9552639 3.692225 1.203991 0.435350351 1.643050167 0.205665588 0.1747455  
0.8945129 0.8721094 0.1289008 0.6291154 0.6673225 0.1544974  
1.592149377 0 0.1576516 1.215740491 12.55152 0.36270773 2.850673  
0.6649993 1.170273 2.063672 1.007179 0.7825746 0.9948457 0.04058016  
0.2643005 0.969230128 1.023978 0.03401048 0.4772125 1.247439 2.67686474  
1.846869 0.1566224 2.020146 0.151725965 0.2794911 0.6182604 0.2076945  
0.2596153 2.008326 0.5819726 0 0.566538722 0.115215123 0.537386277  
0.395797 0.800736691 0.244951782 1.371008 0.3759726 1.217406805 0.5917389  
0.6503591 0.05183763 0.766748983 0.191369 0.1592295 0.3259687  
0.074645797 0.1119133 0.3511095 0.2045058 0.1017558 0.2834074  
0.7029593 0.5457349 0.4958204 0.4080063 1.635026 1.335646 0.514419365  
0.8299601 0.8152087 0.9987689 0.09666476 0.5544524 0.2232189  
0.3129839 0.220284754 0.46244084 0.440958751 0.5779687 0.360666  
0.1258128 0.3085149 2.398184 0.801739494 0.8750229 0.8379252  
0.471345 0.6093874 0.08166888 0.191334003 1.220635 0.3080357 1.387626  
0.7917805 1.753372 1.867065 0.1150929 1.18003204 0.5477516 0.8079123  
0.273711917 0.442909 0.9606411 1.016406 1.363163 0.4440973 1.666797939  
1.38160181 0.043652654 0.06186221 1.739103 1.687747 0.6690762 0.2686963  
0.273424 1.324314777 0.4763631 0 0.06762306 0.4163653 1.26901  
1.090342 0.04580189 2.151864189 0 0.4031459 0.5863591 0.7204561 0  
0.827954 2.989035 1.008645605 0.9898083 1.507439456 0.2142208 0.08062438

2.031573363 2.82067 0.03312357 0.5109875 1.967530562 0.185505 1.891087  
1.794783 0.55460989 0.3429388 0.3366925 0 0.2000755 2.099848  
1.027179 0.4704124  
Z83843.1 0.5662745 2.635325778 0.7490359 2.070927599 0.683574789 1.320249316  
1.138855 1.418879108 0.3119086 0.1846435 0.473211407 1.344349 0.8267993  
3.0611 1.46521 1.73352 0.7414543 0.58949554 0.4742341 1.209755  
0.610039291 1.841446 1.122450314 1.671473 1.010787 0.994390549 1.37782  
0.2484461 0.3593513 1.694293 1.381123 0.808320256 1.004309 1.281998067  
1.417591 2.73093822 2.615849169 1.248945528 1.952909 2.008957 1.338657005  
2.18144 0.338081465 1.094277 1.199882551 1.478418 1.064165 1.068018 0.763472389  
0.556528 1.917556 2.422703 0.810441756 0.9187496 0.45243043 1.836675  
0.2389952 2.697323 0.1803438 1.016003 0.2003294 3.595953 1.317548299  
1.342381 0.5216332 1.670597 0.362686 1.336216 1.980511 0.525669 0.772932  
5.03740906 0.1860705 0.384308 1.057751618 1.422014 0.777956907 1.234328  
0.8629213 1.075059 0.60901 0.6618393 1.703052 0.975170131 2.141741978  
0.2664686 0.2665374 0.9097551 1.22513516 1.078616 0.3159125  
0.2531678 1.71360956 2.178196 1.314846 0.567936698 3.98303 1.490712058  
0.48871699 0.2796605 0.250148523 0.2957165 0.8468857 0.357376991  
2.340413 0.5856259 0.852991313 1.378251 2.615320747 1.574577146 0.4897246  
1.943685471 0.8905375 2.062768 5.67323 0.3157236 1.618219 1.776423608  
1.540899 1.660037 0.2519399 0.3547221 0.6809307 1.152237 1.977022  
4.647877 0.8248612 2.905901 2.261205 1.916362884 2.001505641 0.7327318  
1.276894411 1.936832578 0.5838472 2.204161944 1.467493 0.2796117  
0.71041932 1.115522494 0.536602916 1.274722837 1.115865 1.124664 0.6844726  
0.7309508 2.306315 1.696585 1.408097983 1.088789 1.680687 2.325336814 1.63782  
1.729706 0.427272433 2.156091 1.113814 0.740943921 0.9866598 1.274606  
0.534126813 1.199584 0.962373 0.46305 1.349335207 1.263026 1.134861 0.279449927  
0.2560367 1.411609793 1.353758 0.3517569 1.065915264 0.7537614  
3.374544372 1.400625 4.405051 0.3432771 0.5796365 0.7810253 1.453899134  
0.8243767 0.3739484 5.449112 2.452306 1.121129 0.1006497 3.134391  
2.490565 2.357659847 0.134226084 2.374298 0.5592832 2.400125 0.5147441  
1.757272953 1.518341 3.078564755 0.8093989 1.316631 0.950680697 2.122870829  
0.6037305 0.5235845 1.113475505 0.5485914 0.4730665 1.673036  
1.806515 0.9603108 2.208492 1.523018 0.4925906 0.1410527 2.117075  
5.085081 0.1066728 0.6148108 2.067797948 1.789705 1.338431 0.644483055  
0.4929423 1.642828 2.069536 1.364677 0.8858041 1.900394948 1.670207  
0.4875213 0.617582 0.03533534 0.4895602 0.318694439 0.3413302 1.12885  
0.3832795 1.709981316 0.554508817 1.996234 1.023192 1.665116 1.876293267  
1.200632 1.654722 1.183099814 0.89404 1.114721 0.264671 1.946877 0.3909104  
1.042714 1.93865246 1.5172 0.328426485 0.9980085 3.223058 2.279709  
0.6800584 1.336066 0.5956566 0.5816708 1.360321402 2.261808 2.856446  
0.118892677 1.397188 0.2771613 1.284354 1.321885 0.332183 4.185035 0.68029  
2.729954 1.403621582 0.3499369 0.836219222 1.299343 1.732319 1.227578  
1.61745791 1.158715244 57.76055 0.976086 2.115505 0.0883824 0.8639426

0.56901924 0.5984514 54.8609 0.4805232 1.874901089 0.3850741  
0.3395996 0.65439823 0.4693299 0.842926507 0.2017332 2.652617  
1.059823826 2.257281 1.887838 0.18835698 1.758537314 0.3224025 0.728688  
1.734935 2.320401 1.689971 1.479771 1.561222 1.063326 0.6846386 1.348434313  
0.1737382 0.461505046 0.8964323 0.323831427 2.012665 0.4202205  
0.910581828 0.6167816 0.3119289 0.3207311 0.750443233 0.6844513  
0.374792 0.364907037 2.585102869 0.5655774 0.5999733 0.8575446  
1.333661114 1.182127905 2.852808778 0.9423144 0.4701384 1.723322  
0.3189386 0.5986649 0.6608705 0.28115 0.4927627 2.280018 0.5203911  
0.7179647 0.879101757 0.9203258 0.8064378 2.555129 0.5727428  
39.89454 3.971145 0.7385985 0.9257515 0.7948082 1.113253 2.083264724  
2.52538 0.4598695 2.170759 0.819676 2.096609019 0.2384985 4.315964  
2.038624 0.212372 2.755639 0.2405706 0.5409763 1.770441104 0.6255729  
0.3693421 0.57528117 0.4611753 1.881806 2.884859 0.8763909 1.473077  
0.506935707 0.859161095 1.459656 1.527422 2.892163 0.257698195 2.104419546  
1.127371131 0.7541325 0.4325704 0.7969072 0.9954568 3.11568  
0.5925153 0.3415628 1.712236228 1.377520216 0.2387234 2.147753215  
47.06049 0.298152925 1.513243 1.877709 1.024726 4.728123 2.090798 1.400744  
1.515572 0.1167519 1.120605 1.255097011 3.845379 2.075461 0.8756425  
0.9555768 1.908232129 0.980228 0.5691961 2.550177 0.739031028 0.8195051  
0.2223472 0.2704706 0.6289947 1.668604 0.6110002 0.2592396  
1.53345966 1.596346956 2.071895847 0.4452198 0.664457173 0.29673399  
1.781938 2.827599 1.680796784 2.465465 0.7659589 0.5141421 1.85767569  
0.4098315 0.566615 0.6596252 0.452128681 0.2711431 0.4164721  
0.3987031 0.6111978 0.5686222 1.496888 0.9803841 0.9402807 3.94931  
1.822725 2.255085 0.288672653 0.8007385 2.697224 1.162374 1.180753 0.21537  
0.450678 0.2406131 0.183461034 0.411911547 0.472173741 0.3281953  
1.759776 0.5258122 1.915388 2.804641 2.618085495 0.9275006 1.659234  
0.4654778 0.6459341 0.8326901 0.212466415 1.604519 1.599896 0.8404834  
0.9058742 2.617702 3.106148 4.22917 1.502079115 0.3400668 2.28364  
0.746041382 0.460326 1.49892 3.895609 1.702937 0.5884139 1.971533373  
2.280884356 0.363554938 0.3653312 2.653952 0.6406671 0.4920998  
1.251133 0.4140314 1.168966259 0.6540071 0.098371684 0.5631891  
1.213674 1.559882 1.984696 0.3016959 1.932981056 1.062022 0.5916789  
1.911305 1.242003 0.2143284 1.730143 0.9912616 1.162267368 2.076928  
0.923274994 0.3406023 0.140398 1.545747693 4.088139 0.6119186 0.5093928  
1.003749503 0.372193 1.697689 3.344208 1.152414634 0.6031799 0.6831796  
0.1914691 0.2207307 0.805179 1.424421 0.5271172  
AC006435.2 0.9479974 0.879643998 0.2779442 0.728555833 1.075331476  
0.407471259 0.4042024 0.315807978 0.07761908 0.04594889 0.192697514  
1.035632 0.6545741 1.331366 2.168588 1.51084 0.8570897 0.269837052  
0.3317153 0.3998133 0.283377697 0.8885924 2.04837581 2.629498  
0.6001572 0.574098034 0.6127946 0.1236526 0.1100619 1.383932 1.31041  
0.330312905 0.8614409 1.872734307 0.3506062 1.428646833 1.295689173

1.663817283 0.8350111 1.506464 0.939895264 1.56825 0.106272302 2.099154  
0.521180752 1.236169 3.668242 0.6264774 0.155176393 0.08566583 1.726788  
2.321501 2.205715761 0.6075096 0.303608642 1.474019 0.1816673 1.57167  
0.06981165 0.7150218 0.2791733 1.269859 2.52053516 0.1497006  
0.05236012 0.8690126 0.1562108 0.6757663 1.8178 0.1109935  
0.4533862 2.228901646 0.09045437 0 0.961854571 0.2664441 0.121737292  
3.006653 0.2624596 1.279808 0.272796 0.2445031 0.7515804 0.185573478  
2.650478796 0.1657781 0.156946 1.316106 0.555889353 0.2458769 0.1442825  
0.2300917 1.072965781 2.259986 0.9060982 0.504911865 0.3836845  
3.310163821 0.119406947 0.1473757 0.056377316 0.1635325 0.6680351  
0.213441525 1.778562 0.2331746 0.284886765 0.9764442 2.531150897  
0.347441345 0.06093447 1.8391088 0.4718191 2.370218 1.032506 0.2763442  
0.4870817 1.13288911 1.199529 1.627471 0.1684363 0.1203727 0.2372313  
0.7766156 1.660831 3.225541 0.8867592 1.1864 1.671727 2.375455476  
1.767012377 0.3625996 3.70362554 1.011156517 0.105312 1.97640081  
0.9721744 0.1151701 0.087785006 2.061294822 0.130196326 1.167359633  
1.860851 0.474141 1.242652 0.6289374 2.645682 1.069569 0.886379004 0.4627413  
1.78879 1.471820962 1.337211 0.6260955 0.240741708 1.397697 0.2908754  
0.882059675 1.038654 1.015002 0.355724359 1.372979 2.518855 0.1911147  
1.416088944 0.8961076 1.715924 0.161917907 0.1227108 0.656090672 4.84822  
0.2667746 0.570952715 0.3472133 2.782132925 0.5836157 3.914364  
0.08750872 0.4567717 0.0262058 0.936438195 0.3326721 0.1105637  
3.33717 1.66834 1.597007 0.01113194 1.286807 1.358489 1.09518883 0.208431137  
4.454091 0.3887406 3.919879 0.5346578 1.26424258 0.6423317 1.566263016  
1.05089 1.052765 0.077191863 1.392629844 0.1905477 0.4383758 0.616871325  
0.2047771 0.2901044 1.334098 1.499103 0.75202 1.850785 1.137018 0.137292  
0.127344 1.812944 2.630505 0.03822585 0.1188753 1.519027162 1.811491  
0.7912556 0.172116065 0.2971082 0.9776152 1.403134 0.5891899  
0.1785795 1.721785304 2.240811 0.2687719 0.6978198 0.2813846  
0.7886762 0.068963252 0.05096442 0.2168479 0.1192248 1.487786733  
0.161549985 2.034833 0.2111059 1.209138 1.38616661 1.389326 1.36789  
0.550431262 0.7965159 1.633581 0.118555 3.33692 0.1442787 0.3702872  
2.003404529 0.3787272 0.03700962 0.2055363 3.978014 1.583614 0.08907046  
1.152606 0.4197083 0.3878736 1.018416711 2.163704 3.052609 0.085699341  
1.510666 0.06056091 0.6041055 0.5312296 0.9309282 0.1352904  
0.6064173 2.547579 1.746469992 0.05971371 0.264120326 1.25842 1.302071  
0.6546112 1.784450317 2.076109729 2.064943 1.93191 1.999344 0 0.4027202  
0.159301755 0.07812502 1.910147 0.1024964 1.041194112 0.1541126  
0.07141692 0.338433318 0.0528877 0.410601723 0.1561831 1.318043  
1.489351053 0.798724 0.686486 2.62488832 1.2821109 0 0.09259682 1.15574  
1.183458 1.39016 2.076517 1.30613 1.676859 0.1689656 1.238992755 0.02964693  
0.063218224 1.046163 0.228327252 1.425691 0.02757961 0.42561407 0.5780982  
0.08219025 0.08401534 0.46138057 0.210404 0.1213604 0.036323134  
0.843328064 1.471426 0.2171702 0.2781722 1.322638133 1.317039741



2.928449246 0.1279073 0.03190769 0.04183922 0.1740002 0.1201847  
0.3887211 0.01499244 0.1548947 1.746955 0.1691433 0.1383228  
0.315023336 0.6679132 0.8027346 1.20672 0.2741763 4.860502 1.300126  
0.3839413 0.1704979 1.344969 0.4393508 1.962358641 1.913759 0.07961003  
1.351939 0.1562385 2.066719202 0.455023 7.487566 1.680483 0.1219597  
2.457168 0.1596439 0.1972384 0.840486804 0.1429148 0.1499139  
0.207900934 0.1175635 1.550205 1.82467 0.2799688 0.9293528 0.304796658  
1.668302607 1.073352 2.099884 1.220844 0.125274678 1.083494387 0.743996099  
0.5267856 0.287056 0.8839046 0.9034545 1.572998 0.2194584 0.2095856  
3.026732156 2.137224929 0.03564407 0.866262121 3.586451 0.398315064  
0.6952127 1.132065 0.2415838 2.799503 1.134445 0.9073611 1.131459  
0.1100992 0.3585405 1.088129146 3.218064 0.01537913 0.2030963  
0.597258 1.787735823 0.3036844 0.3364082 1.175774 0.377347638 0.4940408  
0.2329749 0.1314837 0.1320693 1.37416 0.3596534 0.2580491  
1.441023836 3.542724979 2.01876615 0.1917586 0.304150164 0.055382129  
1.360453 0.09445016 1.403227026 0.9324662 0.1524883 0.128922 1.6074954  
0.04944843 0.1080025 0.1071994 0.067507868 0.1180804 0.7012232  
0.1271532 0.935593 0.2563069 0.8145413 0.3477281 0.2455568 2.59713  
1.618898 1.238125 0.12314873 2.401907 1.769413 0.5677651 0.5099575  
0.3052204 0.157013 0.05443369 0.059766074 0.110705401 0.170911079  
0.09147269 1.268469 0.09102568 0.5347758 1.384585 2.04912208 0.2784379  
1.763341 0.06486764 0.2525945 0.233888 0.144198236 1.162632 2.047564  
0.7647265 0.6365042 6.640151 3.050609 2.706268 1.36734061 0.2105337  
1.009002 0.137521385 0.1001391 0.8498942 1.011135 1.253359 1.418259  
1.4505286 1.508527635 0.197392065 0.1118934 2.124306 0.2927263  
0.2485218 0.7290074 0.2135583 0.876350135 0.2441264 0.073439963  
0.03057834 0.8943081 2.751014 0.9552641 0.1346219 1.53378623  
0.4084424 0.1822977 0.5581991 0.413492 0.3339301 1.64732 0.8824535  
1.334919353 2.122805 0.376431397 0.03632552 0 1.519747119 3.796051  
0.569167 0.3080832 0.921468498 0.07339774 2.061466 1.746959 0.571239197  
0.3817177 0.09134898 0.1649335 0.1809434 0.4747629 1.332318  
0.4892441

MIR3936HG 1.444178 3.290527879 2.109452 5.012909622 3.266956582 3.381970203  
1.354529 1.239005596 1.530991 1.918478 0.993213932 5.508468 1.850111 11.05036  
2.209416 6.28789 3.128152 3.180107712 2.275868 1.159477 2.412968388 1.624207  
6.595317765 5.784218 6.0002 2.539507093 3.455009 2.839538 1.996601 7.166575  
1.560953 3.402113531 4.91047 3.493192061 4.049467 8.887427315 4.616998118  
4.442054805 3.360429 11.14208 4.090443113 8.33675 1.893428723 2.603171  
1.924683849 4.833088 11.03144 4.673812 1.91791855 1.59844 4.191123 6.461887  
4.604698648 3.013328 2.091605311 7.521479 4.612682 5.917208 0.9950543  
4.131689 2.980073 8.008864 12.745446664 2.126561 1.017696 3.802109 5.487627  
4.396703 5.158747 0.5684373 3.676212 6.321930554 1.18882 5.707088 5.000736018  
4.279648 1.292615402 10.16633 1.870472 3.400982 2.032507 1.152867 5.404987  
2.207295621 8.82656645 3.071775 3.796148 3.843587 4.254806278 2.814288

4.415042 2.67857 5.085925017 8.358683 6.778414 4.652423221 2.420977 6.7213802  
1.891062767 3.239319 0.754867992 0.6427624 0.5358578 1.624848824  
8.228387 4.185891 2.229353758 4.589336 10.997319777 1.230552845 2.089722  
4.439350617 2.284905 4.453594 2.275315 1.713153 1.583395 3.751447756 4.875258  
3.793452 0.5480597 2.058866 1.541859 6.559658 6.110556 4.711484 3.58895  
9.980219 10.78835 7.443239957 3.424022252 2.554438 7.691052384 2.212817705  
4.043246 5.358179332 2.028455 1.075724 0.39812052 7.217933182 0.653186567  
3.814441889 2.299076 3.663497 2.859206 6.128141 6.173145 8.740961 2.633235073  
2.445752 5.71403 2.249439839 9.597163 4.119743 3.337807518 5.606451 2.567332  
1.762842542 6.417973 11.69592 5.24375629 5.191614 8.353102 2.14621 4.186949691  
4.078449 4.205996 0.962962734 1.850974 3.24469791 4.763807 2.700602 4.358775327  
2.844238 8.139172888 4.016415 12.32543 1.2257 2.066348 1.290349 6.01799179  
3.643934 4.12602 10.42856 9.193238 1.313078 0.5913995 5.776349 4.729647  
5.614483339 0.706357134 3.513913 3.308359 3.145304 4.185611 5.906913941 8.07015  
7.21042759 4.198593 6.829957 1.000224984 4.0789687 0.9559655 2.259505  
3.938113872 3.857678 2.331714 0.3527912 4.60998 7.587648 10.95508 2.177718  
0.9403187 5.017932 6.839971 4.692243 2.388529 1.209455 6.955733574 6.322553  
4.162466 0.966428393 2.514051 2.264812 2.853174 4.389846 3.12386 7.894867141  
8.835576 3.797058 5.841485 3.311858 4.943525 1.411890422 2.1499 9.894039  
1.410984 4.726975146 1.273428927 9.003449 3.373704 2.799039 5.306508191  
6.846071 5.637992 3.925526419 4.192099 5.917544 1.314299 2.748848 3.070533  
1.134085 6.127184378 2.992917 0.999078396 3.022069 12.44232 8.561758 3.023856  
6.270814 4.014081 2.447409 0.306430591 5.872512 6.947777 2.342545781 2.268176  
1.586892 4.065595 3.801802 1.924749 2.578437 4.537846 10.35905 5.151051642  
1.437884 2.644564959 7.609546 5.608727 1.671312 4.079720383 2.31105017  
5.460572 3.022992 8.977422 2.035659 2.114501 1.926564312 1.548001 15.66189  
2.434873 2.477670811 0.5683591 2.128409 4.724806842 1.216408 4.017312107  
1.758749 7.040046 3.075696288 4.814125 3.29753 1.86258264 6.68318618  
1.780646 2.72463 5.175502 7.467399 7.508025 2.860212 6.401487 6.374616 2.152907  
5.004847505 1.626254 2.386484648 1.701122 2.743941759 4.805552 2.227587  
2.624711137 2.009158 0.5620793 1.582158 2.092442438 1.577383 0.361103  
1.134819305 6.56586865 1.420295 2.687385 3.6822 4.240137225 8.29973012  
13.999705682 3.894839 2.12237 1.237882 1.044251 1.927172 2.673437 2.933429 1.70601  
4.914232 3.269285 1.269573 3.782617624 3.282121 2.461132 7.465311 3.479371  
22.51224 6.58548 2.995571 1.877863 8.040145 3.928138 5.265847709 6.743697  
1.805228 4.791233 1.788293 4.660213721 5.819123 16.17683 10.09781 0.9534542  
6.810034 1.798541 2.539519 1.955647583 2.072297 1.424523 2.424516385 2.118177  
5.788966 4.547807 1.929535 3.73309 3.87045882 3.777564696 2.549822 10.31138  
1.77076 4.637900457 8.945191831 5.639657096 3.464145 2.744592 4.035094  
1.365775 7.177193 2.274931 1.635476 5.584629445 4.158974188 0.8467494  
5.99371242 19.8521 2.196051211 5.073437 5.783518 4.904227 11.9427 6.387772  
1.971302 2.384629 1.91802 2.418787 5.789972301 9.849654 2.603891 2.500067  
2.551023 4.866227444 1.39548 3.364888 3.875227 2.380562859 4.099013 2.012538  
1.48467 0.3739523 9.274544 4.137404 2.659045 7.268357671 9.2598358

6.72530801 1.899446 1.476337604 1.859837343 9.081909 2.953563 5.613270801  
8.139098 1.69362 3.087941 3.587278557 2.146463 1.780422 1.169118 1.640143475  
2.652076 6.760364 1.328071 1.497168 2.269442 4.067359 2.892393 3.181838 7.386429  
5.225007 2.686907 2.659529792 2.060977 0.1432964 2.090028 2.687192 1.186481  
2.669095 1.161448 2.839568395 1.864826083 1.531768857 2.455204 6.738912  
2.113233 2.761732 4.5877 4.166590527 1.398852 6.967925 2.517594 2.152266  
1.116551 4.687783527 4.382539 12.55589 5.877679 7.697758 3.451261 10.35623  
9.073925 8.052107846 1.989851 1.382569 0.920676067 2.964744 3.858499 4.896681  
6.784661 6.803398 6.093161873 7.989906221 1.730735284 4.663765 6.052192  
7.111957 1.87615 5.602134 1.791407 3.312002305 2.294946 2.236281563 0.8452764  
6.288763 4.330086 5.119779 0.05814611 3.205526112 3.133962 2.610478 3.321128  
5.15764 3.335356 3.484796 4.438717 5.780219486 6.705415 4.073509828 1.040755  
3.102106 3.05672268 24.95465 4.146857 2.461754 5.13742998 2.75808 7.842042  
14.11067 4.886468373 4.523678 2.39364 0.9071017 2.27203 6.396561 5.633142  
4.001206

SPINT1-AS1 17.27579 2.252813615 2.544131 3.695577822 6.298884934 1.535561256  
1.193832 1.507139835 2.757242 1.952575 3.18587002 1.564563 5.547145 4.975892  
2.579099 3.592721 1.266219 5.119011833 1.435868 1.180378 3.870639399 0.641309  
6.915176572 1.842491 2.443682 3.37153774 1.438615 4.043544 1.548351 5.794988  
1.030359 3.302452305 3.347121 4.192521448 2.043416 2.707427318 2.816677995  
3.825794679 2.626931 4.620655 4.633113942 2.859517 4.326350567 25.51927  
2.128217833 9.481685 2.344453 1.730041 1.31962074 2.986204 1.764202 0.08563455  
6.117518345 2.849628 2.192279835 2.833717 7.069358 2.230592 3.188444 2.656076  
1.529257 2.75049 7.306586473 1.756026 0.9908275 0.7212547 4.024347  
2.350296 1.708466 0.8843647 1.252043 1.64470834 3.371915 2.023416 9.153964173  
2.935643 1.616613597 2.831638 8.780678 28.323 3.101853 1.501685 1.709183  
2.829238019 2.544138453 3.780999 6.810764 8.670486 6.592250699 2.154985  
4.333115 4.561438 2.986700096 2.231951 3.333018 2.836726745 2.193129 4.850472626  
3.184549329 2.91931 1.347595315 2.361652 0.2376212 1.88664909 5.077136  
4.03506 0.550783785 2.467859 3.565798205 1.26881055 2.111962 3.910197186  
3.004608 5.654896 6.253984 4.160815 1.008531 2.382003235 4.602486 4.136099  
0.8835181 13.4633 2.36274 3.319525 1.291911 24.86299 1.962624 3.477316  
6.627275 4.151025218 2.856201248 3.374757 5.487592182 1.168208139 4.358637  
1.546619658 2.904753 5.677914 0.903451071 6.525532258 0.588506471 1.845072998  
2.34182 2.820248 3.817012 5.692864 2.802307 3.882567 1.259607746 3.953813  
2.486509 0.714147353 4.743451 1.490719 3.176955037 1.91693 0.6549775  
1.54854257 2.617824 10.74088 3.908605794 2.57327 2.862263 3.437378 3.372076735  
3.330192 5.639698 1.215686123 1.222156 0.914820213 3.64702 3.819409 6.340432199  
6.331939 4.333567467 5.386348 2.74547 3.486223 2.310557 1.200602 5.228543929  
2.66389 9.106721 1.661851 3.288234 18.28188 1.773923 2.471685 4.660357 2.895732472  
17.054317753 1.131662 3.111714 10.84643 6.672892 2.2284792 2.747117 3.129573767  
3.885683 4.836014 3.809848681 2.066066784 1.270058 7.189458 6.548412315  
4.377096 6.117857 0.2304912 1.314307 6.73088 2.505353 3.202832 0.7618258  
1.248789 3.611255 1.446043 7.931582 7.314214 2.090996004 1.759356 2.606668

2.134976723 4.640394 10.74578 1.334664 3.977283 5.113442 3.909828401 2.836505  
2.899945 4.517524 111.4691 9.176862 1.483594913 7.156984 5.791999 3.277326  
3.252387564 1.005612802 2.159827 2.180002 1.50194 2.630354336 3.035254  
3.949816 4.500421546 2.585575 3.560956 2.151618 1.690279 2.455903 2.279811  
3.095679929 2.5426 3.741317168 2.379717 3.542262 2.266126 2.341971 4.525592  
3.652651 3.392795 0.102570358 1.64535 1.423115 5.206563507 1.217985 2.292028  
3.20423 1.676795 4.970247 3.065436 2.959454 4.059678 4.85381593 4.50506  
2.212048911 2.339572 2.827294 11.47466 3.407507761 2.605677984 7.680807  
3.206856 4.646309 31.13067 0.8272584 5.517803647 1.556195 0.8878045  
3.968468 2.152248294 4.203284 1.849347 2.816145147 1.935779 3.644942196  
2.144407 2.027573 2.472234596 3.435117 3.294266 9.15003443 3.603411049  
5.753284 3.94254 3.334152 4.680566 5.293868 1.046679 4.950492 0.6159203  
1.430412 4.375065327 3.705674 3.488156093 20.01141 9.537668251 9.340963  
2.472148 3.873943005 5.797823 2.223824 2.142113 2.051422603 1.436948 0.4297623  
3.810596797 1.722922674 12.32284 4.899056 2.737902 6.366952949 2.010594587  
3.513215158 2.611519 3.55924 0.3541982 1.067151 2.842867 3.613422 5.405363  
5.463715 1.13763 3.49556 1.435048 2.907435715 2.311905 1.441713 1.728816  
1.482379 1.270304 3.335295 1.724832 1.346349 3.444535 3.019287 4.449468691  
5.321804 8.583009 1.599668 2.437858 2.012973513 17.14228 2.658973 1.557911  
1.724839 2.319791 2.292245 2.385372 0.62107049 8.936797 1.40777 1.732781556  
2.525779 3.763377 1.072509 1.115356 1.696938 2.995190924 3.134325512 0.8604314  
2.759975 9.037223 1.37246043 4.778968555 7.298787883 6.728761 5.3021  
2.329509 8.998086 3.716628 2.254031 3.005853 3.160853553 4.554746518 4.029276  
2.48874897 1.73397 4.130426801 1.283838 3.452957 2.749816 3.63679 3.381355  
6.750635 0.7467365 5.153778 2.6697 5.328378439 2.743915 1.210048 3.337565  
2.610721 1.316843947 2.201228 0.9875177 1.639441 2.90410109 2.654766  
2.621993 4.527237 8.856779 2.249289 3.049086 7.581729 5.039176744 3.307901502  
3.686135556 3.781497 1.615588063 1.144541649 4.442221 1.824939 2.461863241  
3.585602 2.505903 2.077773 0.988858087 1.723711 1.703139 2.255448 4.168597246  
7.593849 7.537378 1.174299 1.31371 2.137908 4.234351 4.379334 1.446128 4.961278  
0.4443525 1.854705 4.033880151 8.629058 0.18357 8.57207 2.539498 2.942176  
3.552045 3.231156 5.644943489 4.202079575 1.276660236 3.826349 3.95248  
0.6006115 4.052526 1.581507 1.695477729 5.940363 3.643078 0.6737469 2.90455  
0.5517098 1.742544704 1.169637 6.35374 5.087367 8.835478 16.63209 1.659292  
2.695346 1.262177127 1.578798 0.8836453 0.712225359 1.613893 1.128619  
2.980474 4.164415 7.400189 3.030984749 2.428185782 4.325100709 5.070604  
2.787071 3.217407 1.065407 5.808524 4.511405 1.847455481 2.045247 7.844650532  
2.58867 4.641011 20.44008 1.227625 0.0721962 1.116952365 5.479756 1.145238  
1.223082 1.684732 9.825042 0.857624 2.903682 5.50647948 3.387876 2.138013404  
0.9527119 24.67282 3.20795837 2.827987 6.295242 3.528659 2.014830242  
2.485452 2.859197 3.205817 3.011187028 5.393764 2.168365 15.92304 4.080543  
5.414861 3.055617 2.235085  
AC008969.1 0.8239776 1.506656168 0.4609613 1.380056639 0.501673258  
0.828961918 0.5891718 0.582099119 0.2906777 0.4280371 0.075771987

0.2516579 0.8031337 0.666924 0.8168973 1.231928 0.349059 0.256238962  
0.3905919 0.4592078 0.409331019 0.8029916 0.840574023 1.58003  
0.6866578 0.561583015 0.9312667 0.185228 1.168899 0.413782 0.809719  
0.626229963 0.6392324 0.512029446 0.7385592 1.325004767 0.995529858  
1.168288681 1.1652 1.091499 0.688373463 1.726317 0.320872931 1.41015  
0.874642963 1.224225 0.8567444 0.4278988 0.455958943 0.421066 1.092037  
2.770303 1.38531155 0.6467461 0.62463496 1.569375 0.4209546 0.9104581  
0.2577046 0.952575 0.06160884 1.534004 0.434549374 0.5769692 0.1966975  
0.6892975 0.3232114 0.7998804 1.146972 0.3629624 0.8248311  
1.815995112 0.3284616 0.5161702 0.597010479 0.8992015 0.074083291  
0.8674439 0.5478505 1.041822 0.4150254 0.3576743 0.6948577  
0.270633066 1.523941265 0.09312402 0.132244 0.6324813 0.541016734  
0.6664225 0.1324841 0.358519 1.926020745 0.9894804 1.180858 0.298173711  
0.651277 0.983156356 0.333514445 0.4737236 0.188036667 0.2135805  
0.4489734 0.277265083 1.463452 0.1903351 0.578939249 0.7652553  
1.798354566 0.48467547 0.4569607 0.985473882 0.7268498 0.5397235  
0.7516314 0.2716582 0.4662218 0.876296063 0.9196012 2.246129  
0.1892345 0.6001099 0.4664173 0.5528929 0.6690707 1.136563  
0.2598256 1.28053 0.9160575 1.925761358 1.086164367 0.3371359  
1.029986705 1.166305617 0.54721 1.241564424 0.5818153 0.3153907  
0.098624511 0.721108851 0.133614477 0.422318127 0.7009267 0.4180113  
1.174283 0.4753944 1.511739 0.6798738 1.083872887 0.5147492 1.460261  
0.985775124 1.139608 0.8270498 0.664336975 1.145533 0.6003029 0.377914012  
0.9347149 0.9672465 0.447993014 0.9360239 0.3584828 0.5115223  
1.099198076 1.140115 1.273153 0.411049312 0.4003326 0.559737854 0.7055421  
0.3629365 0.473071393 0.3581397 2.355606362 1.040891 1.714174 0.2984536  
0.7933922 0.377221 0.356666852 0.5680995 0.1987454 2.311228 1.790491  
0.4188272 0.1922873 1.39837 1.013634 1.825489803 0.403038755 0.7723122  
0.5257073 2.745526 0.5021277 1.541529087 0.5969493 1.017816819  
1.704565 0.654741 0.367369745 0.837299477 0.4137433 0.8967705 1.033223127  
0.3273966 0.8219001 1.254122 1.257226 0.4590503 1.555826 0.4064502  
0.4544705 0.203597 1.383981 2.408389 0.5600861 0.5731681 0.955622926  
0.9069779 0.7066077 0.283460773 0.2181043 0.9810075 1.514398  
0.5148436 0.7570653 1.315383621 0.7369782 0.3444223 0.7746519  
0.2123994 0.1053547 0.296355977 0.1073576 0.177181 0.1121802  
1.188107474 0.175826025 1.817871 0.5788888 0.7784315 1.153651822  
1.042682 1.118345 0.614802006 1.603305 1.434904 0.2034907 0.8390061  
0.3776052 0.4325553 1.623954783 0.8037064 0.309247452 0.683125  
2.712773 1.224448 0.645443 0.8746989 0.3648767 0.4097161 0.490128417  
1.014233 1.279996 0.419511433 0.8233437 0.3713787 0.6530507 0.6588027  
0.1435938 0.3063664 0.6940707 4.400554 1.216981806 0.5450821  
0.59683865 1.340172 0.9752321 0.4657794 0.71222818 0.58785661  
2.982751 0.6068714 1.472131 0.4977285 0.5355137 0.323143881 0.3730299  
2.539442 0.3166692 0.783517511 0.6459534 0.3891413 0.605596068

0.3082317 0.468823174 0.09400086 2.014097 0.799588319 1.306934 0.8077694  
1.36918039 1.733934111 0.3640156 0.5087741 1.085772 0.9490185  
0.7169252 0.7094781 1.345124 0.5461345 0.5338945 1.451298305  
0.3330767 0.34269213 0.5466201 0.239544985 1.346554 0.5112539  
0.34368324 0.3473966 0.2558558 0.2430526 0.219836301 0.3799033  
0.1893691 0.241448738 1.226839766 0.6486676 0.6328386 0.3274569  
0.518020307 1.014237585 1.018793244 0.4610409 0.4256901 0.349603  
0.291942 0.5379896 0.3065435 0.1221167 0.3045363 1.201503 0.3087968  
0.5487654 0.58397088 1.03178 0.8704375 1.310098 0.4547125 4.347233  
0.8188565 0.6298163 0.5250538 1.104712 0.4298441 1.354462662  
2.722175 0.4108655 1.24301 0.4656433 0.591148877 0.136137 1.941423  
2.514345 0.2295069 1.545634 0.3867372 0.4972652 0.458807792 0.1476593  
0.4330927 0.422581097 0.4835071 0.7574239 0.8653587 0.3606938  
1.245678 0.483685622 0.516497733 0.7941211 1.600177 1.435305 0.286513202  
3.540986274 0.383974634 0.2811202 0.5258966 0.5729119 0.6118716  
1.428823 0.1791388 0.4238365 1.518654978 0.506688991 0.15017 0.879646865  
3.2518 0.072389408 1.00683 0.8023583 0.528288 2.039808 1.230335 0.8511991  
0.878715 0.2396571 0.5778439 0.88927586 2.331168 0.6155328 0.2103481  
0.4683064 1.236994543 0.6563028 0.4326501 0.9856365 0.539562188  
0.5969949 0.2928241 0.5486708 0.4657387 1.327366 0.581456 0.4063952  
1.158004954 1.276728319 1.115644225 0.330336 0.549170319 0.233327235 1.4051  
0.8276788 1.37336925 0.2607626 0.4573558 0.2617013 1.11767485  
0.6197767 0.6269151 0.4949172 0.312854832 0.5661768 0.518393  
0.2986944 0.3058581 0.4656774 1.082519 0.650583 0.3613397 0.9466963  
0.4009944 1.316083 0.336279202 1.34021 1.718702 0.7284782 0.9207739  
0.404142 0.4740766 0.4571339 0.352515772 0.426675578 0.550042435  
0.4000593 1.3004 0.6024067 0.7901942 1.245528 1.022682889 0.555665  
1.291382 0.2954136 0.3837538 0.06914948 0.372608109 0.8279143  
1.811364 0.6856704 0.7448942 1.605793 2.2954 1.717552 1.07485549  
0.3304463 1.314379 0.334111076 0.4768637 0.5516838 1.517519 0.9695262  
0.682123 1.288132009 1.161963374 0.218993545 0.2396342 1.323823 0.766388  
0.2883133 0.627065 0.4688068 1.076862477 0.6352592 0.154702823  
0.3907777 0.9562613 1.488467 0.8034711 0.1730589 1.382708875  
0.6950622 0.7522735 0.587929 0.6405147 0.1094226 0.6703629  
1.154562 1.25760483 1.161932 0.245746361 0.1173314 0.1996754 0.852108398  
2.02577 1.299928 0.3677575 0.572659544 0.4049411 1.383174 2.066985  
0.469591166 0.2680321 0.6008047 0.1976525 0.1052731 1.496921  
0.6591544 0.2882701  
AP000757.1 34.46771 1.1518933 0.6358976 0.742628839 0.41478992 0.473412277  
0.352449 0.554569451 0.0872331 0.4518517 0.238221863 0.1667395  
2.361826 1.29574 0.4193405 0.8292439 0.1565282 0.270767404 0.225832  
0.1083218 0.409470818 0.2279538 0.493305181 0.76495 0.1785424  
0.467218656 0.3412736 0.3647921 2.817912 0.288492 7.034172 0.460462993  
0.5019987 0.86609094 0.7114481 0.936600739 0.546065724 0.480024741

0.5362496 1.168659 0.681923043 1.088002 0.302320745 48.24723 0.329475947  
3.653632 0.7605859 1.200126 0.563435764 0.4910103 0.6479336 0.2484806  
0.710107054 0.4129577 0.946869083 1.242445 0.1968772 1.115002 0.1092817  
4.088513 0.3025467 0.7378203 1.606366653 0.4486474 0.1103354  
1.885477 0.2018932 0.6600137 0.4100297 0.06682571 0.2258203  
1.544059645 0.206947 0.6013149 0.550504872 0.386005 0.538712464 0.9543375  
3.469229 26.67609 0.1916156 0.08587114 0.4328946 0.372999571 1.214173065  
0.4192012 0.3118245 0.4070975 0.228830167 0.4973969 0.1216152  
0.6557135 1.727633514 0.5282589 0.4073316 0.08730016 0.1406114  
0.673478309 0.458506001 0.2898522 0.05940028 0.2756819 0.02681354  
0.067465892 0.5067525 0.1351226 0.734515186 0.371696 0.814097695  
0.30261888 0.5649758 0.791580139 0.3856432 0.24832 0.266417 0.6302797  
0.3025174 0.515347119 0.4475263 0.6464754 0.09464956 3.469989  
0.2570932 0.9546342 0.2145845 20.23443 0.02768318 0.75239 0.3591803  
0.527869161 0.244165242 0.2002428 0.292185538 0.352283983 0.6904105  
0.46109751 0.3529904 7.389943 0.197316389 0.542955475 0.059091838  
0.374333738 4.450175 0.7215933 0.3915613 0.3118405 0.5309608  
0.3321448 0.318895018 0.3695143 1.138958 0.190860347 0.3396831  
0.502996 0.192774251 0.49249 0.2878174 0.138615796 0.2680034 0.6111012  
0.174099891 0.220935 0.398978 0.3411314 0.249574245 0.9244284 0.3736393  
0.629907622 1.026369 0.953953148 0.1604988 0.6464819 0.866256946  
0.4137674 1.03618453 0.508325 1.198938 0.7165332 0.6990991 0.08835508  
0.310944311 0.1794611 0.4380106 1.670903 1.702287 13.16918 0.2345768  
0.6843594 0.6361473 0.747296099 12.554778106 0.2298573 0.3762114  
0.9677137 0.2253305 0.659672765 0.06369634 0.631398615 0.7639946  
0.2897539 0.318094217 1.12493227 0.1482572 0.70206 0.735551021  
0.3850437 0.4146343 0.0229491 0.1334776 1.098716 0.8569123  
0.1645717 0.314105 0.1073378 0.4701918 0.4031351 0.7195895  
2.816719 0.853588123 0.7397397 0.4104285 0.105509799 0.2048984  
14.52537 0.7707461 0.4276501 0.564465 0.13932348 5.495714 0.2265468  
0.7282348 12.9855 0.1945674 0.244141217 0.4152579 0.897285 0.4321249  
0.807693057 0.306382196 0.3623563 2.34132 0.03435429 0.627243381  
0.3399843 0.5541498 0.917123127 0.2237934 1.467869 0.2220657  
0.328629 0.1105563 0.2837397 0.620831623 0.4138137 0.077988169  
0.4692073 1.079797 0.5676831 0.4129243 0.5791799 0.1516159  
0.4122251 0.019290327 0.1848423 0.7664353 0.361178233 0.09095245  
0.7146518 0.4026219 0.6199912 0.3215885 0.9693039 0.2811308  
0.7566835 0.32245844 0.7549869 0.566684395 0.618752 0.5536991 2.8692  
0.316653968 0.142271947 7.033171 0.3285367 0.725589 0.1589038 0.933491  
0.208871973 0.2798679 1.234376 0.2591815 0.347735646 1.548819 0.5417734  
0.690155199 0.534946 0.842665165 0.06582307 0.5939857 0.86306571  
1.377085 0.4909642 0.94821785 1.554411906 0.3745439 0.3219542  
0.6606434 1.214388 0.4529495 0.5016069 1.574944 0.4109938 0.299083  
0.86632937 0.7121945 0.213145598 26.25969 1.652858851 3.581566 0.8833765

0.229200412 0.06799211 1.143084 0.410734 0.180558819 0.2660231 0.0454641  
0.224521961 1.002463846 8.164139 0.3661039 0.186197 0.718456713 0.98273605  
1.556761546 0.2695315 0.6723718 0.03526612 0.1157874 0.7217854  
0.3528555 0.07582244 0.5331206 0.339808 0.5435491 0.1457397  
2.106553589 0.406085 0.5324238 0.7824154 0.4401946 1.510913 0.4317069  
0.1721397 0.1950377 0.3429588 1.160358 0.692126319 0.4152535  
0.1845332 0.8765723 0.4097109 0.602024973 0.9338296 0.4267847  
0.4008885 0.07195955 0.9384842 0.4709713 0.3800034 0.114265018  
0.2839469 0.234672 0.451931905 0.4105316 0.5716647 0.5294778  
0.2770254 0.9139059 1.618545206 0.117183824 0.3309968 0.667371  
14.63608 1.583903197 0.61319777 0.078388933 0.3441198 0.3849338  
0.6533426 0.6509754 0.7475675 0.4855741 0.5653084 0.730689497  
0.542374668 0.120177 0.898669573 1.438129 0.059247925 0.1709144 0.849846  
0.9308802 0.3590833 1.026017 10.23317 0.2527887 0.3557416 0.4892963  
0.458589948 1.073289 0.1166671 0.09629385 0.2936655 0.486595274  
0.462176 3.223598 1.151149 0.231319913 0.6391641 0.2847419 0.918282  
0.5566035 0.7956842 0.3770896 0.3417993 0.337398189 1.306440333  
0.582959073 0.2262856 0.317406774 0.513495231 0.79835 0.03184467  
0.354832408 0.7928067 1.037435 0.2173356 0.398515213 0.2188194  
1.046901 0.2823685 0.113804248 1.180135 0.1449766 0.243584 0.3749119  
0.4185777 1.222436 0.4538302 0.7559229 0.9091389 4.44826 0.5260475  
0.265270738 13.47597 0.0776787 2.023033 0.3193106 0.2113282 0.7184477  
0.2202333 0.151129786 0.559878953 0.168070343 0.638845 0.3054821  
0.2301756 0.2547777 0.399902 0.478300753 1.605803 0.4913433 0.1093534  
0.4258219 0.07263175 0.243088282 1.435322 0.915775 0.3305564 1.25185  
6.536746 0.5693018 0.5264083 0.323269535 0.2296516 0.3519243  
0.162282749 0.2302005 0.7004532 1.02446 1.688591 0.2327416 0.85105682  
0.667875485 0.116466712 6.425176 1.024412 0.405355 0.1092929 1.536194  
0.4358076 0.307780074 0.5204852 0.309511318 0.1159846 1.057977  
20.05849 0.3376597 0.09601502 0.389236896 0.4657832 0.0945588  
0.3058275 0.390777 0.8444052 0.3786871 1.817172 0.412572753 0.7760839  
0.308717109 0.1326808 0.1690138 0.975081204 2.636533 0.5049986  
1.119879 0.169624634 0.2032762 0.514845 1.333371 0.129181675 0.6032782  
0.526151 9.03642 0.03268211 0.5809005 0.2163589 0.6633972  
AL731571.1 0.08445954 0.496374014 0.6679848 0.743407629 0.323191753  
1.184218164 0.2915171 0.355986999 0.2293967 0.1741001 0.108059237  
0.4576535 0.4203249 0.8924154 0.4611058 1.243429 0.2305731  
0.362225729 0.3103497 0.5193911 0.349724891 1.619026 0.816447009  
1.327833 0.5337195 0.657076958 0.7090014 0.1265002 0.078192 0.832228  
0.1975602 0.488106082 0.6310391 0.486029639 0.6169889 1.317196471  
0.773224236 0.852970401 0.6448234 0.8819597 0.705940663 1.151852  
0.193279323 0.1254551 0.453205454 0.8175425 0.5039299 0.0712116  
0.512884324 0.3388693 1.512018 2.32051 0.943695026 0.6950105 0.403780476  
1.433929 0.2507512 1.173145 0.1632442 0.2240593 0.1858682 0.6754769



0.554383034 0.5823407 0.3154437 0.4170734 0.3456591 0.4365001  
1.402749 0.2631466 0.459142 1.834031503 0.3084581 0.0493598 1.006951485  
0.7458091 0.046126203 0.735011 0.4502183 0.09862751 0.2222289  
0.4724748 0.6065675 0.188224378 0.589459996 0.1620582 0.2803433  
0.1756789 0.537831595 0.4891039 0.1009266 0.1469633 1.816948936  
0.7253429 0.6179764 0.253118997 0.7205686 0.700632977 0.208118888  
0.290371 0.288378074 0.289984 0.697883 0.236553216 0.9795223 0.5665429  
0.095244232 1.071732 1.911794235 0.602935764 0.2465803 0.483338328  
0.8483546 0.6058196 0.1437121 0.3178156 0.754733 0.633656467  
0.429168 0.5422251 0.2552818 0.2353432 0.4751162 0.7405525  
0.8405821 0.9332827 0.5400771 0.9940956 0.6706763 0.829690724  
0.851717456 0.2785677 0.568233613 1.054364767 0.3431629 1.363990163  
0.527033 0.1047309 0.199570187 0.794970497 0.079689067 0.59135194  
0.2426772 0.395234 1.034968 0.4625903 1.623011 0.815851 0.705282041  
0.6948702 0.9713101 0.450427607 0.5580297 0.6182737 0.394057097  
2.346677 0.7849051 0.224318562 1.089077 0.2348709 0.226958517 1.035713  
1.018446 0.4217007 1.346266377 0.6689341 0.7639412 0.368103717  
0.2188845 0.604079652 0.476174 0.2691275 0.506220898 0.3729016  
1.901145223 0.5705198 2.649617 0.4092523 0.2377443 0.2025591  
0.451583994 0.2359643 0.3192212 2.207928 1.113885 0.398057 0.10376  
1.595053 0.9889072 1.203402956 0.298887958 0.6406193 0.3371388  
0.8613151 0.2279043 1.076656552 0.3951332 1.472951228 1.04224  
0.8254624 0.224234367 1.005864834 0.1799407 0.4949792 0.824333766  
0.2291887 0.2035918 0.6808627 0.492008 0.4786992 0.5155755  
0.4073166 0.2987427 0.1291631 1.271689 1.324183 0.07821229 0.3483231  
0.833858189 2.238173 0.807171 0.110272124 0.3131608 0.3192329 0.8673612  
0.3869559 0.5404638 0.914380921 1.340939 0.1680319 0.661009 0.003998119  
0.3411024 0.197543888 0.05020702 0.1747843 0.1734691 0.845582548  
0.156088596 1.826504 0.3687864 0.54977 0.839242889 0.4245281 0.6340048  
0.79446104 0.7310255 1.065084 0.3653529 0.4822807 0.2415293  
0.8111986 1.51036393 0.5931315 0.096758203 0.3757595 1.946675  
1.249719 0.3543619 0.4535191 0.838301 0.4754002 0.400619009 1.718312  
1.028664 0.100197587 1.809844 0.1675095 0.7026554 0.7580614 0.3122513  
0.4421301 0.4377142 2.338727 1.414225787 0.3325948 0.447608487  
0.863035 0.7013629 0.6812609 0.811352871 0.402911638 0.9484675  
0.5855997 1.126856 0.06000168 0.3404675 0.148886423 0.4018408  
2.728551 0.2767054 0.361756359 0.3907853 0.2045724 0.392142421  
0.297581 0.353091696 0.08876656 1.551619 1.237964756 0.5887648 1.125564  
1.44922906 0.874424199 0.1795897 0.36576 1.528153 0.8968237 0.8498518  
0.7599251 0.8413165 0.5488437 0.6875855 1.661226205 0.09098897  
0.11785051 0.2343369 0.189310996 0.6418772 0.2507977 0.524111161  
0.204778 0.2833908 0.1298802 0.67429369 0.2699159 0.2176548  
0.294524319 0.865206821 0.1541671 0.2098285 0.4705769 0.855290831  
1.916749699 0.62414328 1.119519 0.4606217 0.07133788 0.2227692

0.307381 0.3829442 0.2113194 0.2670373 0.5448114 0.2211047  
0.356391 0.539517122 0.4854004 0.3141281 0.7196031 0.6440887  
3.730304 0.6538373 0.5497105 0.321162 1.022642 0.4128452 1.113723167  
2.248598 0.2126576 1.195248 0.5564676 0.504394965 0.0989472 0.7987882  
1.184566 0.2800355 1.847493 0.2177604 0.2775817 0.764304138 0.2529595  
0.4308861 0.253733805 0.3894485 2.026434 1.190057 0.4206304 0.8427676  
0.207877161 0.327552614 0.4582733 1.803897 0.4463245 0.313279011  
1.435701353 0.456677635 0.1976028 0.4034207 0.4482655 0.881194  
2.624973 0.1995664 0.1747061 1.088929319 0.517222963 0.2876676  
0.958168353 2.897237 0.191758945 0.7935401 0.6313443 0.4262961  
2.458127 0.9864376 0.3548003 0.2758202 0.2294409 0.205717 0.769611035  
1.694771 0.1118812 0.167373 0.3922547 0.774744533 0.6577932 0.1529579  
0.8923713 0.366540636 0.5641875 0.143004 0.140917 0.4103361 0.5840544  
0.2054059 0.07542619 0.851765084 0.713609953 1.181360308 0.2906289  
0.497188446 0.286435187 1.36242 0.03006118 0.633110644 0.5290448  
0.641333 0.2184859 0.609079257 0.2135902 0.08184419 0.2863554  
0.226371493 0.1610661 0.4541849 0.3363721 0.223158 0.338687 0.4155205  
0.2754084 0.3543662 1.277653 0.5737943 1.210571 0.189754718 0.1706403  
0.3184541 0.3960273 0.4107362 0.2602077 0.2396683 0.195524  
0.167575498 0.302012818 0.362645516 0.2406322 0.659139 0.3517938  
0.4017287 0.7638151 0.881525558 0.3997894 1.832109 0.4950776  
0.5324842 0.1567176 0.305965207 0.3070296 1.266646 0.971792 0.6300597  
0.3604944 1.333307 0.9307509 1.357129239 0.2280516 0.7672572  
0.365789655 0.3414838 0.5281202 1.560337 1.06268 0.5164534 1.241459824  
1.094663101 0.367975465 0.03815672 1.481323 0.4682149 0.2628426  
0.3970671 0.1482062 0.630892449 0.6137606 0.104348878 0.1807434  
0.3780885 0.3913638 0.885024 0.05885559 2.069647028 0.3550345  
0.3984953 1.725851 1.156524 0.07275243 0.8341163 0.6018502 0.890208563  
1.395464 1.637542927 0.1458955 0.02900874 1.070015202 3.28973 0.1872812  
0.2801582 1.526601971 0.281282 1.704509 1.522942 0.41493566 0.3199997  
0.4291899 0.0424954 0.1410364 0.5187722 0.5835472 0.3022408  
AL049840.1 1.767759 1.725746422 0.9887927 2.218853885 0.784936417 1.810026425  
0.67377 1.7926339 0.5002856 0.1346176 0.338730388 2.382974 1.362592  
3.703498 2.724473 3.057267 1.506622 0.779254702 0.897078 1.305211 0.984402065  
2.535418 1.309347707 3.568929 1.380779 1.792145798 2.394828 0.1086804  
0.4474008 0.8370664 2.533832 1.194769213 1.346018 1.675111096 2.134251  
4.394818853 1.160703803 2.276959992 2.015328 2.460638 1.924058379 3.456508  
0.303564863 2.291964 1.717780576 2.215311 1.293081 0.2002261 1.017658552  
0.5270523 4.680403 3.951266 1.682848885 2.273597 0.747171353 3.223788  
0.558847 2.382861 0.3067934 1.070055 0.3505289 1.907124 1.206731093  
1.710468 0.3796668 2.02263 0.5217263 1.828967 5.265645 0.6271336  
1.521504 7.249168577 0.2157909 0.05452279 1.085439909 1.62464 0.196161206  
1.503739 1.100974 1.639605 0.9190997 0.6446941 2.069808 0.351300396  
2.346432687 0.2039874 0.3251503 1.379608 0.829451148 1.210191 0.2341152

0.3659429 3.469934026 2.303488 1.730811 0.500670148 2.331265 1.170432389  
0.862912691 0.5613011 0.346857021 0.4743142 1.146336 0.539342714 2.587  
0.7044856 0.913194094 2.796116 4.112716946 1.760979894 0.5248524  
1.868632793 2.023185 1.129885 1.018609 0.5000547 1.644823 2.24431209  
0.7086188 1.701698 0.2664749 0.4655096 1.002818 1.611649 1.289254  
6.718053 1.731974 3.009072 1.21002 1.935986984 2.741189604 0.5824427  
1.106440782 2.891312275 0.6787772 3.97049833 1.156809 0.3922469  
1.14447722 0.744094292 0.933059405 2.888448709 1.445356 0.8450374 2.09251  
1.056793 4.490728 2.869666 1.491603219 1.626845 3.427166 1.459456332 1.046498  
2.974985 1.248393217 4.863494 2.011897 1.23515614 1.956196 0.5894254  
0.645475761 3.082659 2.080142 0.8102275 2.760804952 1.775049 1.734379  
0.470725839 0.3567435 2.133603126 0.6823044 0.4982547 1.041277047  
1.06284 4.791013358 1.077195 5.940752 0.4285149 0.9085777 0.3109419  
0.685876504 1.309913 0.3789879 6.655873 4.630525 2.942564 0.1271927  
3.312207 2.520666 3.529461819 0.183193748 1.917442 1.062976 2.839809 0.67551  
3.941989321 0.6641841 3.462915483 2.043565 0.811992 0.489993618 2.728514651  
0.8373784 0.3981393 1.785223301 0.5953255 0.3547518 2.82372  
2.347532 1.51581 2.852431 1.241611 0.7067716 0.2927266 4.671331 2.642282  
0.2015842 0.8126342 2.724471075 4.885233 2.282497 0.715121968 0.3204821  
3.077652 1.745934 1.352162 0.7455441 1.138006884 2.249028 0.7382134  
1.723154 0.03091423 1.048225 0.169716401 0.1343805 0.4331623 0.3562818  
2.870162529 1.242404535 4.542496 1.484357 2.519511 3.590855354 2.639157  
1.603016 1.47385237 2.048358 1.977587 0.2547113 2.156824 0.4380676  
1.508913 4.117227972 1.553393 0.211434591 0.8957202 4.696363 4.095606  
0.5166848 1.578014 1.34381 0.9337938 3.147950536 3.225209 2.873275  
0.107603772 5.532293 0.4346956 1.469398 2.593129 0.764556 1.753909 1.479049  
4.488886 2.558338047 0.5510759 1.424495115 1.990886 3.113628 1.470337  
2.452811687 0.919782058 29.9646 1.236255 3.392484 0.5965003 1.59281  
0.435596252 0.7381535 18.18766 0.6643833 1.743914784 0.5730673  
0.2385244 0.585314529 0.4067343 0.737460631 0.3431801 4.610863  
2.386228037 1.393388 3.364214 5.10848992 2.516160779 0.3688528 0.508656  
2.662097 3.904377 2.156181 2.27023 2.208268 0.9511889 0.9207423 2.462562281  
0.260572 0.333381576 2.109421 0.318728314 2.38328 0.3030025 0.820896906  
0.5317332 0.3371127 0.1624536 0.811030803 0.845384 0.5570323  
0.340533696 3.287956788 1.506931 0.5917116 0.9779614 1.110823435  
3.273453651 2.018144097 0.44968 0.3926191 0.1654795 0.378305 0.6073863  
0.9373576 0.329428 0.1928645 1.870074 0.8176465 1.033382 0.922931616  
1.886229 0.2313237 3.761077 1.044239 31.11577 3.531992 1.457509 0.5994141  
2.523174 1.055485 3.510663614 6.911337 0.4373165 3.006152 1.220628 3.085336933  
0.3651513 4.949199 2.415229 0.5466817 5.016682 0.5612551 0.825506  
2.180410934 0.4755247 0.7341022 0.711676476 0.7528227 1.958597  
3.628119 0.7489069 2.205426 0.785813835 1.499625158 1.794738 5.173799  
5.292604 0.220212182 3.156201069 0.523128881 0.6134763 1.112407 1.517902  
1.485664 3.015104 0.6751002 0.3684168 3.654611848 1.373486033 0.4072665

2.09377529 22.83045 0.741358657 2.507788 1.399207 1.122327 5.759071 2.70741  
2.217037 3.151118 0.1290241 1.515613 1.315016474 3.113288 0.5541965  
0.6136104 1.151953 1.914987852 1.542167 0.9492725 4.666236 0.894469949  
1.363252 0.2764337 0.4787624 0.6577753 3.413273 0.9637367 0.3402058  
1.533921748 1.648462528 2.431487414 0.4719118 1.19658806 0.790990129  
3.859622 0.6143028 2.684844118 1.097499 1.08177 0.3193331 2.57638382  
0.6193204 0.3322384 0.4239872 0.237335355 0.3261748 0.6744604  
0.6705431 0.7683871 0.4927838 1.676288 1.123909 1.313712 2.382451  
2.363993 3.441572 0.589293375 2.808488 5.26489 1.236205 1.037287 0.6610779  
0.5520057 0.3636046 0.271402113 0.529749348 0.888782244 0.3790141  
2.389027 0.4200213 0.5926387 4.297569 3.227962298 2.022192 2.420811  
0.9285023 0.5852983 0.3786783 0.591445565 1.414086 1.383396 1.594158  
0.9673557 2.820077 4.234567 1.95166 2.652708243 0.6204341 3.119192  
0.749393596 0.4800762 1.228378 4.685894 2.781087 0.9376574 3.099744208  
4.111539844 0.64191787 0.07375879 5.987252 1.387486 0.8357326 1.081244  
0.6223741 2.516115255 1.173807 0.161369149 0.1746929 0.8825521 4.22764  
1.823643 0.3913713 3.710820123 0.5279222 0.6162486 1.471833 1.916243  
0.293497 2.550204 2.316993 2.727884878 3.843937 2.056648168 0.2447747  
0.1441936 3.787897154 6.779595 0.5265798 0.6600255 2.178337408  
0.4239265 2.831867 6.552792 0.967407137 0.6919652 0.8564075 0.1932839  
0.2726303 1.103766 2.11639 0.8039227

NORAD 117.517 58.375846441 54.40607 81.426689117 52.892840754 89.444214182  
89.07085 83.968765944 56.53509 65.28555 55.310339056 34.88812 122.6495 68.23722  
63.57885 46.87668 38.69197 43.680856837 89.24881 67.38569 76.781108554 57.70578  
39.855033519 60.74585 54.70227 63.078531565 104.9843 48.22835 84.44006 63.37847  
199.5718 74.157452987 69.69881 47.09572588 81.15845 76.373045142 50.541641101  
47.106958211 67.04913 77.56895 64.101547392 66.38196 60.209210737 87.64936  
58.621959956 101.9446 46.09159 35.89 62.177555533 75.56035 80.00512 86.30784  
55.080269992 83.96718 61.836351415 62.11635 54.18337 72.6458 82.10217 70.14726  
78.08466 71.4064 46.51559691 63.47218 94.63131 93.88083 73.60107 47.02295  
105.4717 59.19813 104.8481 68.671253371 66.39061 67.63183 53.001040672 83.88192  
82.769881874 99.34824 112.236 112.3393 65.38933 80.83551 87.54813 77.036417789  
69.930037267 41.23973 36.4588 63.91913 59.902671771 96.43096 92.17624 58.04576  
61.658294146 87.21038 59.36807 34.309796757 148.3976 42.642009046 63.286332932  
73.80663 55.099286013 43.01319 64.42999 47.285313368 66.11117 53.29396  
72.213382158 74.2091 68.890360226 55.334753248 59.12358 74.116305258 59.65435  
71.15251 48.53211 46.37806 61.95692 83.440957392 47.1137 78.37026 87.05659  
90.01978 62.60933 60.83261 46.92984 106.2475 83.30582 75.85486 63.26111  
62.600275532 82.648054689 73.08008 45.98876686 71.277831291 75.6617  
69.515838382 54.73646 86.62552 52.553699485 42.946390659 66.672745788  
43.891237296 183.1815 75.31127 87.21893 39.02648 67.1318 80.42748 62.045104909  
64.50399 65.38927 64.307317944 52.15643 88.32004 54.877408191 49.51916 74.20424  
52.726296572 62.03929 54.82027 92.29144266 68.49549 39.59615 63.26501 50.77907988  
58.82427 40.36402 60.796715755 50.15725 90.420249885 53.13718 52.66488

63.679214985 64.33103 65.477186996 61.90137 50.83279 45.66995 61.98546 48.94001  
51.292626559 78.28048 66.04313 44.04754 63.55134 124.4763 35.07146 74.0184  
70.44088 76.707540846 57.735367771 58.21766 45.57028 33.27558 34.23031  
88.261739053 44.17174 66.544535847 63.67401 57.53889 61.247238197 81.539006665  
58.0937 50.10688 62.796525307 29.73053 27.75648 45.77727 95.1838 52.57061  
81.56266 48.63893 72.08654 43.7351 59.63401 50.99986 53.92073 93.69475  
99.638732203 87.71401 57.73458 48.511227609 45.08839 174.6575 72.97971 53.72645  
84.62145 41.677057138 51.63469 90.82621 51.52725 37.63974 47.89683 55.328972729  
46.54032 82.63866 77.51606 62.581660996 60.106383161 69.10906 84.31906 56.57485  
80.419729245 63.15242 56.49209 66.418165389 77.2565 76.19762 65.70588 59.6839  
84.82277 51.19884 74.764862739 83.02857 67.020686318 76.71939 43.70828 75.58099  
82.41309 65.089 81.18788 57.47281 65.204585835 98.75536 59.80644 52.46477739  
42.40068 65.5312 77.51547 79.58025 31.05077 119.9501 71.34189 54.56684 40.07004273  
52.01131 85.564264104 77.46033 89.86927 77.63703 67.072500805 44.036970237  
217.4983 82.84143 81.8058 74.03016 67.8993 65.260204568 90.17661 152.1305  
60.37084 57.529114266 87.44701 74.48086 56.153229713 86.13879 81.314629296  
43.10936 62.71028 92.096631045 65.94164 81.23275 35.49130229 67.657415901  
49.48581 79.15474 58.4698 66.55947 48.44174 49.19427 72.80252 74.49066 41.90379  
57.380924494 53.36211 71.050326446 78.12245 80.03513319 106.0696 68.52863  
62.091819024 26.59881 56.14441 61.09422 63.14910912 70.05579 60.22638  
56.752533234 69.505734899 64.35385 45.5916 99.77258 67.335650201 60.749085382  
44.218354471 88.39382 67.80766 178.1797 70.02974 77.93526 81.03087 55.12085 57.8301  
82.71645 61.6097 72.88467 89.528605468 69.42292 65.51535 94.87612 70.14479  
101.4889 75.9621 75.04017 93.81698 97.07775 78.98995 62.45279841 62.64388  
42.66551 73.50857 84.02298 46.043398152 36.42513 38.30009 78.15816 73.68186  
51.61008 55.67046 80.21246 83.052943012 56.7345 86.16592 72.212074779 50.45524  
78.16123 80.89012 81.91599 71.80312 75.477426213 28.399569238 53.86433 69.29293  
92.64044 56.184457653 70.713552465 45.81857963 42.96148 85.15347 85.12243  
65.93163 82.0538 88.62943 65.77049 49.947715625 41.132761358 94.17308  
63.696488279 108.5904 68.283173017 105.5159 47.42878 98.71471 55.13501 67.00357  
149.7721 69.34519 48.79492 68.75781 60.230436967 48.85464 135.4291 44.16904  
60.27534 84.270943235 71.49282 50.57683 89.65021 50.8787261 55.4393 52.8108  
53.59885 80.79994 68.6698 74.65773 48.85167 49.126794068 45.529244414  
58.194922357 55.62587 67.978216685 82.914847641 67.58487 206.1034 46.885218118  
90.76594 68.66642 59.42466 54.878567813 71.9569 93.90497 88.19967 53.545783253  
153.579 50.58522 82.84451 53.92961 92.65516 72.16039 64.82505 47.81026 34.83224  
91.7141 56.78438 73.229733013 87.03485 108.7161 94.50447 76.24932 50.15527  
70.99682 52.83109 64.896754855 62.182765831 79.179628386 76.03278 57.38379  
86.81888 46.0016 103.3077 78.772672969 98.91392 58.95473 85.26846 55.81853  
68.78505 76.124413743 150.6615 29.37383 68.5793 61.50627 72.06666 40.5177  
72.16483 61.510744837 57.27345 82.35128 67.352920447 80.55332 60.11365 92.25132  
66.29348 36.1742 81.192045079 74.727036557 35.093299647 118.7738 68.65827  
52.30178 71.72095 62.94344 109.5498 68.391109747 50.48028 53.044176013 74.74291  
53.97795 79.49173 88.21615 86.72732 56.270701024 75.55576 78.32779 69.53007

76.57778 105.4229 37.58982 69.89407 66.055659218 60.50571 94.27746749 69.97701  
64.84515 68.723419903 40.05411 29.64404 64.30446 81.815562283 79.63079 73.95803  
82.06144 41.167656433 80.41541 63.45644 28.91858 84.0191 54.84461 101.0065  
99.66414

PRKCZ-AS1 0.4011383 0.927818602 0.6593293 1.434853006 0.86902289  
1.19125548 1.051412 0.852156407 0.2577753 0.3814942 0.402256986  
0.8032545 1.201344 1.621436 1.161995 1.600281 0.5896158 0.850415768  
0.4812094 0.406467 0.729837259 0.9256375 1.722766317 1.46556 0.7411467  
0.690319606 0.7086542 0.07333109 0.5384877 0.7413034 0.2257758  
0.461092901 1.40773 1.686552354 1.275266 1.765096549 0.877745783 1.478081474  
0.8017458 1.480032 0.677342652 1.845765 0.368689505 0.7623316 0.407987746  
1.850837 1.019073 0.7498088 0.509682377 0.6096403 1.324006 1.110138  
2.310941661 0.7391514 0.788629576 1.780834 0.3509122 2.013261 0.2555044  
1.031442 0.2838193 1.044074 1.035409306 0.8049263 0.2328878 0.6985994  
0.237157 0.664112 1.60338 0.6544758 0.483978 1.997194711 0.3310549  
0.1765859 0.8788683 0.616248 0.122731878 0.9668859 1.358394 1.312133  
0.6956508 0.2755008 0.4813756 0.416507167 1.694856759 0.2831421  
0.4308063 0.6788244 0.726796887 0.6474192 0.1342719 0.257313  
1.37051998 0.446004 0.6104336 0.709427078 0.05935844 0.433227767  
0.84975878 0.3146394 0.30090661 0.477149 0.5772797 0.417712696  
1.435068 0.4044753 0.39355312 1.195503 1.718337696 0.684076075 0.2254927  
1.540857457 1.058184 1.248396 0.7647736 0.3933203 0.7297503 0.870205516  
1.231486 0.9651575 0.4714793 0.9337281 0.4823587 1.481484 0.9231129  
0.1112947 0.8336246 1.25439 2.262731 1.844172417 1.078832996 0.3025341  
1.025709057 0.930668302 0.5995616 1.054878287 0.7344225 0.4200487  
0.229064528 1.270456766 0.491779629 0.975229132 0.4619559 0.3186765  
1.132276 1.685018 1.912684 1.221859 0.715409368 0.5892907 1.007403 0.45656789  
0.9385896 0.7866928 0.402610656 2.17686 0.6930044 0.414931714  
0.9503457 0.2579735 0.285815662 4.059321 1.455688 0.576028 1.099373235  
1.132657 0.7937385 0.717963913 0.3090035 1.097230299 2.063885 0.3678343  
0.761846507 0.5538317 1.41586096 1.093702 2.879818 0.2046196 0.5731343  
0.2424414 0.807776543 0.6250091 0.4012813 2.364746 1.424728 0.6435652  
0.4594783 1.460848 1.660106 1.26187023 0.467809641 1.584876 0.6250173  
2.346048 0.344818 0.942540165 0.5781159 1.114630082 0.9254828 0.8409381  
0.39063851 1.331742445 0.5632746 0.1663839 1.124258273 0.9528465  
0.2692861 0.532832 0.6385987 0.777787 0.8255127 0.490399 0.6280956  
0.07668209 0.9924463 0.7901288 0.4080511 1.00577 0.993127341  
1.024911 1.097316 0.256107694 0.4420952 1.195372 1.436102 0.5823564  
0.4209724 1.333134472 1.985623 0.5419355 1.560752 0.0250309 0.5612609  
0.402436766 0.1571648 0.5331044 0.5345315 1.184400746 0.488609514  
1.427692 0.7195387 0.7251252 1.007232264 1.233233 1.237575 0.947401444  
1.102189 0.7238437 0.3374784 0.7752513 0.3080275 0.8025219  
1.53055403 0.7786162 0.355561284 0.4997551 2.447094 1.463776 0.3169347  
1.325022 0.5618126 0.7560822 0.846905427 1.08202 0.7087222 0.322364517

2.252515 0.30887 0.7798391 0.8084437 0.8036818 0.1564539 0.6581237  
4.454759 1.893903638 0.6161808 0.760387934 1.313479 1.702974 1.252629  
0.916621668 0.960951006 0.7197625 3.449166 1.205455 0.8049658 0.7970938  
0.327504646 0.4656301 1.178107 0.3008837 0.8108675 1.223289 0.3151076  
0.310768846 0.2822812 0.978249699 0.1429041 1.355898 0.585150769  
0.8526171 1.258354 0 1.31237545 0.4391998 0.3541935 1.578787  
0.9764724 0.9560526 1.45973 0.9101419 0.9732877 0.757539 1.422789022  
0.2320804 0.539870511 0.7663985 0.621281258 1.591517 0.6869455  
0.900250394 0.8228065 0.4484282 0.550063 0.504238256 0.5240686  
0.2207133 0.318808471 0.815593737 0.6282834 0.2627334 0.3726325  
1.035380047 1.50577883 1.669591453 0.3185881 0.4654953 0.08932457  
0.3388953 0.4597203 0.4894278 0.469452 0.2204614 0.9403838  
0.4814829 0.5660146 0.941581861 0.6467469 0.4120604 1.327778  
0.4366913 2.624895 0.2803739 0.4476348 0.5373393 0.6675895  
0.4794177 1.406415618 1.672067 0.4390718 1.192354 0.5497579 1.492408518  
0.8306606 3.810766 0.7220617 0.477359 2.01276 0.3029613 0.3275173  
0.656015633 0.5303201 0.5258102 0.319266067 0.286848 1.195136 1.287881  
0.424467 0.8156937 0.289211131 0.485691747 1.089884 2.523299 0.9099054  
0.50943797 1.420968343 0.820669746 0.6747959 0.4921368 0.8806422  
2.779172 0.8455219 0.4197268 0.4275674 2.174884369 1.27563948  
0.4565895 1.03140991 2.700973 0.983775242 0.6699709 0.7804571  
0.6385709 1.963391 0.8485776 1.000871 1.10594 0.5223467 0.8991181  
0.699080793 2.075948 0.07661185 0.4065 0.6611707 1.272241065 0.8704704  
0.5166102 1.345219 0.740517208 0.776755 0.563708 0.7351953 0.6579092  
1.182008 0.387042 0.6165074 1.401521722 1.724040827 1.52977009 0.2729297  
0.773029539 0.246329106 1.715737 0.08065848 1.07542144 0.6289669  
0.6588605 0.4170329 0.886018367 0.598229 0.9095089 0.3814418  
0.28825159 0.8163091 0.8285698 0.3043705 0.5020894 0.6384022  
1.173474 0.5907121 0.6078273 2.444128 0.5352218 1.153324 0.535569927  
1.411712 0.5115505 1.303978 0.6325019 0.2715124 0.5507096 0.689531  
0.248106184 0.341394856 0.547329423 0.3812794 0.8253302 0.5101296  
1.257545 1.061134 0.874953857 1.261904 4.988409 0.6133086 0.3431758  
0.2978512 0.328379465 0.4178719 2.299716 0.4744457 1.13242 0.6700279  
1.441969 1.049376 0.806933674 0.3877854 1.720857 0.714429144 0.5377186  
0.725792 1.330121 1.177085 1.348715 1.406717827 1.149449797 1.095696715  
0.07962887 1.555369 0.5877556 0.3537207 0.9078959 0.5679202  
0.997846428 0.7051492 0.862347796 0.08704422 1.083054 0.6846144  
0.5336167 0.1916072 1.173675266 1.436241 0.4191343 0.3773799  
0.6955268 0.4950857 0.9858095 1.025464 1.195409759 1.920218 0.441651812  
0.7927651 0.03891731 0.766754268 1.847797 0.3304334 0.6166328  
0.580387475 0.2462434 1.336637 1.204066 0.703977144 0.4499189 0.4117201  
0.2425747 0.174757 0.871909 0.9307461 0.5752379  
TPT1-AS1 0.3404252 1.503802359 0.6531755 1.376839338 1.932974727 1.127468359  
0.8482358 0.819538704 0.7796133 1.013879 0.397762348 1.543318 0.9536309

1.143039 1.643449 1.71313 1.425179 0.917650045 1.026172 1.109529 0.776401598  
1.133589 2.306930975 3.160808 0.9674452 1.294011008 0.9567374 0.3520569  
0.7572919 1.080393 1.120914 0.74000047 1.213707 1.156041326 0.9550932  
0.993351947 1.1217797 1.471742164 1.144673 1.508784 0.63513083 1.881897  
0.625631949 1.227153 1.320032298 2.253046 2.033884 0.4324053 0.679707165  
0.6239852 1.801364 2.144931 1.008505678 0.9369034 0.732954226 2.049573  
1.057557 2.947446 0.8009711 1.359473 0.5251666 1.962768 2.946378784  
1.033977 0.8913553 1.218011 0.856153 1.374289 2.162549 0.383732 0.8434572  
1.698905368 0.6377099 0.6696837 1.003004077 1.023326 0.280412018  
1.040199 0.9666267 0.6433259 1.081433 0.6115359 1.096677 1.007599241  
2.492647577 0.3126962 0.5612197 1.365072 0.823554788 1.050071 0.4463426  
0.5459203 1.06398909 0.6758936 1.428919 0.652736967 0.5956775  
1.945386131 0.602815164 0.5633516 1.065079802 0.603341 1.279317 0.746963261  
1.365508 0.6344914 0.477125804 1.66157 2.159200246 1.013946206 0.8529889  
1.414271585 0.8226245 3.016742 1.9298 0.8967113 1.05378 0.870372831  
2.710723 1.561193 0.85522 0.9738915 0.7276975 1.175946 1.062791 0.9832926  
0.5052061 1.852457 2.138731 1.870145428 1.457048216 0.7357145 1.755295328  
1.53861692 1.078586 2.296476144 1.383961 0.5038138 0.654347963 1.899501551  
0.361182976 0.93477428 1.043879 0.7921571 1.793804 1.360562 2.784885  
0.9199098 1.270801072 1.054571 1.555668 0.573058102 1.525501 1.117597  
0.729693624 1.823913 0.8416671 0.549801551 1.468541 1.260013 0.692895921  
1.411115 3.527613 0.7455129 1.000316557 1.3439 1.056825 0.434407356  
0.8152095 1.198623792 2.943513 0.6606466 0.575728035 0.8522126  
3.139287122 0.8908228 2.537657 0.7148232 0.9596855 0.4709864  
0.752386539 0.5793496 0.427591 3.096078 1.677085 0.4519518 0.4806961  
1.639227 2.345758 1.35336856 0.296716811 1.82781 0.725911 2.369847 1.004922  
1.595008409 0.965953 1.563782766 1.076821 1.103625 0.468042356 1.560881963  
0.4729634 0.8858181 0.917428348 0.9418176 0.8828295 3.233135  
1.475321 1.379826 1.93739 0.7793393 0.8073744 0.6867853 1.617631  
2.308025 0.5683581 0.7333194 1.270216751 1.651119 1.078272 0.553150486  
0.6760872 0.5145095 1.391491 1.145521 0.6607095 2.089959347 1.974  
0.8529154 1.44082 0.168991 0.9447426 0.891748811 0.7335767 1.358742  
0.766592 1.323732572 0.651604613 1.4325 0.7908539 0.9460675 1.166675385  
1.167898 1.018931 0.920249459 1.6641 2.098819 0.5610095 3.142412 0.8168967  
0.9723963 1.232018332 0.8885918 0.406120277 1.16124 2.419569 1.390639  
0.7935457 1.267427 0.5156866 1.278385 1.050690441 2.119364 2.94844  
0.409568795 1.446495 0.4921316 0.8616546 1.127579 0.8744436 0.7362772  
0.9855768 1.623364 1.896240975 0.772145 0.598172915 1.612307 1.284434  
1.333978 1.516854872 1.41166816 3.799477 1.387169 1.577934 1.583404 0.8405433  
0.743326513 0.8063205 4.728442 0.5334873 1.209543528 0.7059874  
0.572725 1.128048787 0.6368234 0.991144772 0.520112 2.356249 1.450275036  
0.970505 1.188262 7.98501164 1.385551547 0.9986396 0.6522259 2.168492  
1.098743 1.162728 1.276759 1.629101 2.164218 0.741649 1.840627895 0.4062188  
0.490476667 0.7081424 0.748867524 1.434299 0.598739 1.042078894 0.8883553



0.5752685 0.8471802 0.623577251 0.3227029 0.5598876 0.613321582  
0.895273405 0.3536671 0.650519 0.8249962 1.223866233 1.593153932  
1.735050896 0.5690168 0.929277 0.305251 0.3367876 0.6540689 1.053536  
0.8430417 0.5834163 1.559637 0.3599275 0.9271296 0.772345235  
1.004079 1.893657 1.652884 0.6272837 5.316229 0.9534546 0.9574636  
0.9058509 1.285826 0.6428213 1.102894681 1.371179 0.6138743 0.7964263  
0.6384184 1.247518432 1.3847 1.656382 0.9152888 0.8000917 1.981265  
0.6328689 0.651818 1.334798199 0.388734 1.155989 0.660722249 0.8407856  
1.632134 1.493946 1.468592 1.286251 0.976275242 1.218960838 0.8680377  
1.649852 0.8445154 0.571104844 1.672804981 1.919677303 0.6561777  
1.328096 1.167963 3.421044 1.268527 0.7273409 0.8569568 1.682024797  
0.856042331 0.6913586 1.501958328 6.464579 0.650417141 1.420955 1.340882  
0.8188381 1.867505 1.080573 0.6490764 1.738472 0.714011 0.9154944  
1.238865916 2.065361 0.4141484 0.6746186 1.043119 1.690020043 1.026752  
0.344473 1.210286 1.135406731 1.198068 1.193964 0.844523 0.844305 1.25453  
0.3621412 1.108615 2.009613933 2.438225363 1.618763595 0.6202762  
1.170076297 0.558453327 2.014335 0.6207415 1.500757457 0.8108885  
0.8282565 0.6687712 1.071278772 0.8520537 0.9224962 0.553197  
1.217296274 0.6063461 1.476959 0.6472544 0.6131763 0.8608685 1.67099  
0.6294157 0.5382839 2.451333 0.9209399 1.475965 0.410682558 0.8382854  
0.5247681 1.281267 1.327472 0.5043342 0.9419743 0.5385575 0.534121702  
0.538456936 0.787359725 0.7099981 1.954087 0.6695051 2.054937 1.685046  
0.948048925 0.9631253 1.988141 0.721161 0.4658281 0.4877521 0.526876676  
0.575381 2.103521 0.8548643 1.794916 1.072839 1.971069 2.704206 1.032598936  
0.8800308 1.397175 0.920126736 0.7170959 1.191962 1.453963 1.585592  
0.7772237 1.329384627 2.154728925 0.643962673 0.7649159 1.279428  
1.014507 0.3230245 0.8720359 0.5186935 1.58195999 0.996598 0.842911018  
0.4135395 0.9715858 0.7408071 1.03332 0.4766531 1.089771363  
1.271203 1.184449 1.191955 0.8472789 0.9028798 1.865404 1.262862 1.145491362  
1.770399 0.689157574 0.8762313 0.5406221 1.089807668 3.543192 1.290004  
0.9411169 1.252722012 0.5833857 1.746296 1.972894 0.555356336 1.020295  
0.8380477 0.1578343 0.5995009 1.206373 1.022278 0.6674547  
HPN-AS1 0.5203865 0.707052435 0.2324915 1.116077834 0.900433634 0.423167348  
0.1224164 0.187803662 0.1420254 0.01681522 0.141037208 0.0127751  
0.2143294 2.305504 0.9663313 3.471695 0.3450218 0.479634102 0.2801373  
0.438941 0.251851268 0.4807079 1.460285477 3.129531 1.356541 0.760685179  
0.6367246 0.09050257 0.1057289 0.8495405 0.106006 0.404481851  
0.7706075 1.055296664 0.3278932 3.028001144 0.889057184 1.373049626  
0.7566654 2.575977 0.37879062 2.860714 0.102088539 0.4751727 0.357616241  
0.8812636 1.012192 0.3438938 0.170362695 0.0940495 0.6237727  
0.02697031 1.698467639 1.140292 0.066664246 2.29569 0.2279385 1.179079  
0.08759286 0.7849972 0.1751397 1.732515 1.507340262 0.237396 0.1868241  
0.141342 0.2858306 0.6476905 1.574072 0 0.4525061 1.040236526 0.04256  
0.03405249 0.782212034 0.2376722 0.044550361 1.767845 0.10478 0.6668062

0.1996621 0.2013235 0.5775936 0.094031346 1.201901707 0.09100098  
0.1107678 0.5567529 0.667062623 0.3239275 0.1949571 0.07217417  
1.147766936 1.125904 0.3050638 0.198988443 0.2380886 0.292399835  
0.203921947 0.08988808 0.154736673 0.1256756 0.0174622 0.058582483  
0.8800541 0.3039932 0.128786471 1.406284 2.084146045 0.241580954  
0.05351825 1.174224157 0.2354516 1.705382 0.09253489 0.3033885  
0.2533026 1.046336971 0.151122 1.50949 0.03698406 0.05286116 0.3844708  
2.02497 0.7852462 0.4292373 0.5769136 1.761485 1.475461 1.066879995  
1.282692988 0.2470874 0.220329458 0.044404525 0.4110873 1.995460216  
0.3612454 0.07902574 0 1.171922606 0 0.390053091 0.07918462  
0.390407 1.899769 0.9341899 1.890296 3.383672 0.332286339 0.5347656  
1.653024 0.145013111 1.327303 0.5047861 0.145366012 0.9055961 0.1249599  
0.032826517 0.6283297 0.7362573 0.22676356 0.69886 1.558996 0.1851336  
0.749070278 1.380264 1.130311 0.013674151 0.06217841 0.612254008 0.8361929  
0.2379669 0.705182479 0.3811933 2.876823992 0.9183813 3.692169  
0.01372468 0.3167201 0.07192606 0.607503297 0.2045282 0.2184912  
1.67531 2.892018 0 0.02444273 1.328649 0.7833812 1.331194507 0.070408985  
0.2494893 0.5216256 0.09003132 0.5686387 0.870233521 1.223718  
1.153483591 0.9085661 1.202969 0.103578722 0.573344716 0.06436788  
0.3529367 0.44598817 0.2766985 0.3600383 0.02989099 0.6490526  
1.078805 2.189314 0.4665335 0.04306516 0.03226304 0.7995491 0.7313612  
0.01398894 0.04350299 0.569453894 6.732178 0.3786604 0.017178197  
0.1630923 1.200133 0.4846365 0.916372 0.1347886 1.618086035 2.618824  
0.1721272 1.586946 0 0.6124374 0.015142465 0.05595204 0.6925664  
0.1701606 0.858221148 0 1.468338 0.1097838 0.4474616 0.672806172  
0.5740345 2.2701 0.379443615 0.5829778 1.184354 0.01446193 0  
0.1583985 0.05543526 1.002698305 0.4311909 0.101578896 0.3384766  
2.886874 0.8792891 0.1857959 1.119398 0.2194205 0.2592026 0.025125479  
1.974195 1.758866 0.053763593 1.105671 0.05540641 0.6940739 0.5742457  
0.46913 0.1485305 0.4493908 6.259723 1.241736909 0.1147258 0.171344964  
1.381575 1.326471 0.1117938 1.178397074 1.315686411 1.110381 0.372101  
1.234692 0 0.1657996 0.058297261 0.1393774 1.293201 0.0281318  
0.927412912 0 0.07840612 0.287654722 0 0.215592905 0.1224771 2.09175  
1.073038345 0.4915904 0.765088 0.82336355 1.079790762 0.08130668  
0.2033176 2.552278 1.205127 1.321003 1.028661 1.782485 0.6658806 0.1669513  
1.020184871 0.03254832 0.083286073 0.9289709 0.117963504 0.3529409  
0.1211147 0.73983893 0.3099569 0.04511689 0.2029224 0.018090481  
0.1814962 0.01480415 0.106341039 1.210740223 0.3090381 0.2145812  
0.4041998 1.161662246 2.014822625 1.552718787 0.04680832 0.1926668 0  
0.04021656 0.1319465 0.2079103 0.1152177 0.1133689 1.475323  
0.2669387 0.1392047 0.576421703 0.3606287 0.4767656 1.365579  
0.5016809 3.368223 0.7785614 0.2959578 0.1069621 2.159054 0.7074434  
2.490552623 0.9569133 0.08740105 0.7865235 0.1143525 0.867550488  
0.2606367 2.038239 2.251063 0.1071162 1.952978 0.1314505 0.07218036

0.580433761 0.2353517 0.1880974 0.14415607 0.2396993 1.382807 1.0673  
0.1737297 1.110997 0.68040521 0.541145875 0.1293361 1.549523 1.041466  
0.098239039 1.257503475 0.653445684 0.1301264 0.472723 0.1791522  
0.1439813 0.7716113 0.1204678 0.1073784 2.258310504 0.681208244  
0.07826474 0.859592638 1.682012 0.437296076 0.8745568 1.339952 0.3410053  
0.6013322 0.8909184 0.6674271 0.9428665 0.1611653 0.2249309  
0.564125475 2.007963 0.1013052 0.3902014 0.3096401 1.390240291  
0.4074942 0.5637154 0.4468295 0.28873829 0.3531842 0.5243387  
0.1031081 0 1.377456 0.3178068 0.586842 1.617205952 2.473793745  
2.134245853 0.14035 0.333915749 0.167205743 2.646875 0.0829548 1.030985813  
1.406505 0.1913275 0.1415389 0.622875023 0.1628631 0.03952404  
0.0735565 0.203814903 0.07407787 0.8860517 0.1142158 0.1515474  
0.3869117 0.9815007 0.5664803 0.4102428 4.237994 1.021615 0.4641489  
0.105156062 1.471523 0.02023516 0.2408318 0.8317985 0.1914804  
0.1477534 0.09561732 0.076550912 0.094530768 0.140727939 0.08607826  
0.6565147 0.07495041 0.3063191 1.137407 0.813338231 0.09653278 3.23185  
0.0406948 0.1008417 0.0540584 0.031662033 0.6059738 3.624243  
1.001021 0.7570286 1.482479 1.038115 1.352239 1.55607539 0.1767522  
0.07639638 0.030195977 0.1099392 0.7257202 0.3924559 1.195557  
1.047224 0.858692486 0.802986348 0.411748608 0.01535548 0.7848751  
0.2984186 0.142353 0.2501099 0.04935961 0.481056969 0.4099096 0  
0.03357088 0.8440288 0.7041052 0.5638445 0 0.778572733 0.3956599  
0.0923715 0.2451308 0.4539583 0.1985805 0.8015095 0.8339164  
0.757206479 0.5054212 0.212220124 0.06646752 0.1801137 0.697273895  
7.784984 0.4275416 0.2536753 1.325607462 0.09209234 1.492043 2.567301  
0.122369442 0.6548037 0.1170036 0.2897195 0.1560833 0.7902451  
1.623737 0.2568853  
AC010834.3 0.6397475 0.846354565 0.6261672 1.068772298 0.455086042  
1.215693544 1.556931 1.054851336 0.5440224 0.8655095 0.709061182  
1.269238 1.735527 2.326832 1.894332 1.123573 0.6945865 0.894968451 1.408384  
1.088371 1.188148549 1.167756 1.71302839 1.941859 0.9510854 0.780474798  
1.366155 1.137499 1.807992 0.7626865 1.432057 0.85147507 0.8944787  
0.78406089 1.450522 1.942666389 0.900491769 1.599541191 0.8534878  
1.436626 0.969379044 2.267031 0.506264724 0.8674053 1.386956892 2.595026  
1.830308 0.2993797 0.73727537 1.2834 1.551896 3.454383 0.825316407  
1.493719 0.877781407 2.072249 0.9890684 2.013797 0.6946328 0.7110909  
0.6289363 0.9073101 1.131062246 1.311541 1.100957 1.924524 0.9032612  
0.8598751 1.951485 1.729526 1.86872 1.517936097 0.8660665 0.4279952  
0.9207166 1.947716 0.253306048 2.000416 1.755931 0.5701279 1.075496  
0.4819758 1.399242 0.600305195 1.615380326 0.4792912 0.3535762  
0.8251202 0.645584455 1.163241 0.7292725 0.8783368 0.921957735  
0.8860061 2.04811 0.40833046 3.573416 0.600013537 1.342540443 0.7962227  
0.351922938 0.6662165 1.839426 0.4558079 1.366181 0.8235299 1.255300714  
1.917913 3.501418313 1.141487272 1.201168 1.302721167 0.695205 0.9854907

0.7753616 0.9399476 0.8253989 1.819646998 0.826952 1.081674 0.4427059  
0.7118524 0.6383675 1.6443 0.5416683 2.13229 1.481861 1.722461  
1.938462 0.993280298 1.065902192 0.6408309 0.431571846 1.771767329  
1.476237 2.921979152 0.9631113 1.362172 0.269182422 1.23350761 1.224018252  
1.150576507 1.95258 1.280815 2.854019 1.045313 1.416499 0.554838 0.880738263  
1.344261 1.538989 1.314273703 1.925825 1.234188 0.822572625 2.017472 0.9971948  
0.491174184 0.6406965 0.6431205 1.146080364 1.574679 1.688418 0.7977896  
1.657957868 1.406128 1.296628 0.638360057 0.396953 3.039292874 1.116431  
1.117491 0.750325506 0.5821698 1.764318909 0.4601801 3.274846 0.7228622  
0.6476628 0.2238517 0.689900525 0.8568839 0.4068368 2.361471  
1.177011 1.84587 0.6144263 2.133977 1.622979 1.404989697 0.611036016  
1.911316 0.8514482 0.6466147 0.4391425 1.898768105 1.191712 1.943264748  
1.467356 1.214097 0.788999308 1.162904008 0.3274604 0.4800814 0.771125209  
0.5589221 0.5138517 1.162852 1.387371 1.330881 1.815612 0.8452201  
0.4381731 0.785262 1.425431 3.14265 0.7367806 0.9546875 2.077399225  
1.52299 0.3466132 0.6580036 0.4259442 1.144593 1.222393 0.8388165  
1.202749 1.086099969 1.462897 1.147934 0.9607186 0.04622319 0.8089364  
0.290012874 0.2679024 0.699481 0.6580601 1.557528834 1.167667466  
1.719964 1.445545 0.8926994 1.802474997 1.531317 0.5295349 0.706534697  
0.9692153 1.883507 0.450091 0.9041774 1.396189 0.8405222 1.664860163  
1.345659 0.291820266 1.350542 2.636033 1.387419 0.7140244 0.4660658  
0.7616858 0.7756754 0.676702205 1.94047 0.8535382 0.466580954  
0.8350707 0.7030182 1.772414 1.310323 0.7621133 2.222422 0.8567017  
1.562371 1.464523009 0.2746576 1.183286677 1.791585 1.880707 0.8411495  
1.727939223 0.820722772 14.0668 1.558941 1.970599 0.09909909 1.33964  
0.697828774 1.629872 14.3084 1.195437 0.851960267 0.9503297 0.9760768  
0.932554757 0.4865217 1.947244971 0.3665183 2.02367 1.100953993  
1.129174 1.407909 2.71034794 1.546418734 0.9408138 0.6997026 1.239507  
1.194619 1.611969 1.946825 1.48999 1.015875 0.4440971 0.629092604 0.7792185  
0.980333555 0.9704683 1.023732262 1.781749 0.7248827 0.699158363  
0.7950515 0.396042 0.5741316 0.389783403 1.145522 0.5316249 0.493257075  
1.932370622 0.1681473 0.9988906 1.182707 1.854040987 1.574749921  
2.339690323 0.9245018 0.691877 0.9897048 0.8905892 1.046368 1.375347  
0.7289936 0.6276342 1.559957 1.097518 1.484527 1.95956369 0.6475186  
1.141394 1.549232 0.9265182 10.50992 0.9319521 1.545892 0.8002219  
1.737804 1.174004 1.920428471 1.294848 0.6015687 1.214817 0.9923943  
0.639060702 0.3379858 1.613097 1.611182 0.6411002 1.917291 1.136407  
1.258989 1.353949198 1.032974 1.266502 0.690229702 0.5297065 1.485476  
2.162055 1.167762 1.248462 1.36187951 0.465059474 1.290147 2.216721 1.365899  
0.799638578 1.525595702 0.488866446 0.778818 1.989077 1.715587 0.2489474  
1.23151 1.117567 1.009909 2.452223549 0.875819979 0.5152637 1.53247567  
14.00228 0.708198844 2.18889 1.464473 2.116538 1.99946 1.055563 1.311663  
2.418489 0.2170325 1.413543 1.469701827 1.460396 2.930552 0.73398 0.8503029  
2.447268821 1.352475 1.186678 2.044365 0.556005372 1.117315 0.9491186

0.7405337 0.5206821 1.633136 1.325708 0.218005 1.157286567 0.78736469  
1.449318506 0.7728067 1.218143076 0.673226103 1.312605 4.691849 1.078071954  
1.683612 1.646099 0.3696537 2.713128916 0.4386376 1.301052 0.6691683  
0.399223847 0.9753981 1.130169 0.9722194 0.7659322 1.578887 1.540391  
0.8402384 0.6033122 0.6900711 2.077241 1.415444 1.186809269 1.676891  
1.501755 1.4414 0.7659061 1.088726 0.7221927 0.4721296 0.772333829  
1.196210434 1.291479828 0.7899522 1.000185 1.196227 0.8250063 2.353991  
1.408584681 1.425135 1.857686 0.5236584 0.2112413 0.7603294 0.631667102  
1.280958 0.5125399 1.468811 0.8887504 2.344365 1.98231 1.481866 0.723146631  
1.090428 0.9144785 0.614467221 0.897267 2.134521 1.288531 2.160157 1.237052  
1.73803549 2.042527042 0.363167765 0.2389502 2.147451 0.7556417  
0.8803956 1.896112 0.9305785 1.765890631 1.188929 0.048256078 0.421942  
0.6185619 1.619114 1.322867 0.2993951 2.535813532 0.4420379 1.345273  
0.8986173 0.7739281 0.3656991 0.8610192 1.688154 1.169535308  
0.8234699 0.467952452 0.5887649 0.1197774 1.073120754 1.975499  
0.4920913 1.265225 1.517180687 0.6889762 1.464923 2.98272 0.457745117  
1.849796 0.8203249 0.1300498 0.8492477 1.267959 1.028042 0.9224892  
INE1 1.505571 1.251215463 0.8987211 2.16822232 0.809193927 0.905981141  
1.164835 1.323079472 0.5405683 0.3800063 0.369054822 1.990536 1.004713  
3.011052 4.764063 2.844626 1.007284 1.224865776 0.8829811 1.957816 1.022016051  
1.698471 2.709548113 2.491676 1.613494 0.904772636 1.18601 0.4574929 1.40128  
1.962622 1.567062 1.144681425 1.791486 2.055912749 1.170006 2.241257959  
1.203878231 2.522602474 2.492284 2.332752 1.320549384 3.182047 0.537743472  
2.938931 1.173980325 1.86578 3.611759 0.8924365 0.561136026 0.4474566  
2.065756 4.266504 3.10028846 0.6397567 0.773093625 1.924804 0.9488993  
2.411475 0.3776689 1.059864 0.3645501 1.06254 2.381557143 0.651607  
0.5298899 1.471003 0.4895597 1.666811 2.607748 0.8075092 1.237904  
7.788947244 0.3543514 0.4455291 1.038921056 0.8698202 0.808082269  
1.938433 1.07491 1.41627 0.5937042 0.5321285 1.701143 0.466010729  
2.382605853 0.9308485 0.8051341 1.229822 1.012871852 0.8829454  
0.3333354 0.4292263 7.005501448 1.735962 1.293633 1.200307913 0.3703213  
1.142724193 0.848919512 0.4062751 0.423307139 0.2348985 0.9346433  
0.174197647 2.747725 0.513817 0.962851653 1.425874 2.565900476 0.892268591  
0.4137612 2.316384069 0.7468011 2.885242 2.091191 0.6792579 1.121441  
1.338458961 0.8473797 2.4061 0.4545583 0.4243996 1.534156 1.94373  
2.026275 2.04217 1.400974 1.947597 1.712137 2.227740765 2.685662632 0.6367622  
2.811230079 1.32038851 0.6111933 2.350393208 1.171832 0.3383807  
0.554051893 2.307154476 0.523116863 1.872313802 1.337407 1.135095 1.728836  
1.062832 2.248352 3.969469 1.270373624 1.256218 2.05016 2.488657356 1.387358  
1.27745 0.754476869 2.273946 0.8587483 1.112766809 1.079501 0.7100414  
0.629338867 1.515785 1.589398 0.9835653 1.496136454 1.11776 1.32574  
0.357814192 0.1355862 1.7563096 2.256938 0.457222 1.025147109 0.7191832  
3.654087 0.7875004 4.377134 0.5550289 0.9103888 0.7870614 1.315457689  
0.7993142 0.4186914 4.115647 3.256362 1.658272 0.3779441 1.120226

2.687791 2.928340122 0.293109997 3.97641 0.5264262 2.54862 1.025433  
2.017734131 1.726879 2.096071594 1.029205 1.262499 0.683191101 3.504447389  
0.2871012 0.6487653 1.669986665 1.275302 0.6588247 4.444111 2.963909  
2.553207 3.625189 1.499739 0.2048899 0.3837424 2.407846 5.353195 0.1830257  
0.7071576 2.386742105 3.217642 2.013488 0.817282249 1.111005 2.286256  
1.544023 0.9830916 0.5829818 1.654779615 3.303657 0.6873118 0.9763147  
0.04592971 0.7033253 0.360214403 0.1996511 0.952462 0.5137644  
2.469637918 0.632865657 1.946064 0.5078063 1.348288 3.315312168 2.165346  
1.204659 0.785625996 0.6934043 1.972169 0.4644346 2.006508 0.4453139  
0.7692498 3.058512208 1.886615 0.434951158 0.9505602 2.685329 1.758916  
0.593181 1.331432 1.161373 1.563522 1.927562957 1.794516 3.109769 0.239802691  
3.960971 0.3690477 1.229143 1.536791 1.076127 0.2649974 1.286792 3.08906  
2.410894238 0.4678522 0.736818214 1.287229 2.895055 1.348692 2.084889934  
1.851432271 8.19939 2.058014 2.085 0.04923494 0.9367239 0.554718492  
0.6503598 4.032464 0.501907 0.949163238 0.7894933 0.2984245 0.712795211  
0.1726545 0.676042937 0.5972735 1.755208 1.782755837 1.738316 2.13241  
1.95864683 1.444862877 0.4513022 0.952204 1.752047 2.150099 2.867868  
2.513151 1.9543 1.506373 0.5295329 1.084729516 0.4452059 0.37973749  
1.888434 0.719078058 1.33239 0.2340911 1.126989026 0.7900035 0.3935275  
0.702137 0.925237181 0.5298746 0.4754246 0.15810493 1.920101602  
1.286514 1.020907 0.5021297 2.11093357 2.622016043 3.454661572 0.6959333  
0.5833199 0.218538 0.5381359 0.8827851 1.353599 0.5677456 0.5225169  
2.544425 0.8006564 0.5719781 0.713030597 1.658561 1.632485 3.018186  
0.7160499 9.452891 1.080374 0.8000399 0.4929875 2.08098 1.185674  
2.707876723 3.389767 0.545771 2.50474 0.6007235 2.976577375 1.00752  
3.225745 1.876978 0.621104 3.910505 0.4169324 0.7481443 2.867725481  
0.5598631 0.5173673 0.442943042 0.5921362 1.391699 2.285039 0.8265487  
2.049581 0.663349341 2.277525954 1.196492 2.022839 3.403838 0.327172385  
1.47548513 0.971525065 0.8426618 1.0223 1.882267 1.4842 3.430705  
0.7701653 0.4196443 3.165731414 1.110330726 0.6748988 2.349379027  
6.456532 0.979064131 1.929123 1.824743 1.141683 2.834451 4.703657 1.800973  
2.260726 0.2396162 0.3790105 2.289229255 3.023174 0.6024714 0.994527  
1.039882 2.164240239 0.9363155 0.8785773 1.429056 0.895905696 0.8251643  
0.6845026 0.6131932 0.7281591 3.698037 0.5040068 0.2888278  
1.568098248 2.619223795 2.416466642 0.6844326 1.210408834 0.451994359  
1.461683 0.5673406 3.354632085 1.736451 0.711151 0.6427866 2.757640931  
0.5649941 1.104749 0.3849535 0.771339903 1.035287 0.7947336 0.5735901  
0.4806752 0.6066269 1.42684 0.8056087 1.491733 3.391384 1.448166  
3.167814 0.678975923 1.414207 5.896677 1.196348 1.179617 1.067579 0.9372831  
0.5259965 0.390218706 0.481871127 0.613742588 0.4607237 1.372439  
0.4011632 1.032301 2.908002 3.169775853 0.8228611 3.558573 0.7865508  
0.5097574 1.478855 0.37659391 1.64087 3.546811 1.049805 1.090898 3.348628  
4.65972 1.744296 3.004867301 0.6306969 1.953645 0.897890945 0.4041784  
1.701707 1.947198 3.152586 1.081694 2.098398268 2.288227852 0.927930698

0.4383379 2.320525 0.5187649 0.9030253 1.170108 1.042089 2.47943719  
1.012612 0.431547209 0.2196139 1.270245 1.851261 2.199722 0.6896456  
2.519713128 0.5333523 0.4394733 0.8382437 1.554391 0.8721053  
2.004437 2.756829 1.597900819 3.389858 1.076099637 0.6957075 0.5236746  
1.836418109 4.520747 0.8801405 0.7794587 1.230933519 0.2601487  
1.834483 3.089519 0.891484045 0.5919148 0.715712 0.3302394 0.4894363  
0.9599303 2.888972 0.6805299  
LINC00982 8.54788 1.363773575 0.2654036 0.168009574 0.056227078 0.179578405  
0.05835548 0.069590544 0.03420784 0.07425122 0.011323273 0.0230773  
0.1214653 0.1754207 0.002810964 0.203884 0.006295528 0.011325814  
0.01967965 0 0.017841228 0.09364715 0.134826072 0.0999899 0.01944837  
0.257375502 0.09645263 0.01362387 0.003031616 0.02295393 4.112524  
0.008398478 0.03749623 0.014607801 0.1115957 0.10712371 0.230607756  
0.034448834 0.04673032 0.2232653 0.217599351 0.07443155 0.020490628  
9.768677 0.097619016 0.1132046 0.08645169 0.03764967 0.002630325  
0.01510166 0.08592163 0.01082665 0.077632223 0.08204879 1.107233609  
0.04532241 0 0.6926576 0.002197642 0.144785 0 0.2417883 0.045155929  
0.04764876 0.03461378 0.05319254 0.009179245 0.03545475 0.01128353 0  
0 0.423546101 0.3274587 0.02050446 0.002616685 0.03669554 0.053651364  
0.03880972 1.314428 10.20033 0.1302439 0.01795934 0.04140403 0.1824432  
0.029625823 0.3872221 0.01976238 0.01596404 0.048427935 0.1706693  
0.02201101 0.03863036 0.039405946 0.03766417 0.03460864 0.008558534  
0.05146377 0.29344412 0.049700772 0.007216729 0.049692577 0.05044978  
0.003504912 0.029395853 0.05519982 0.009634069 0.00738551 0.01388171  
0.025686186 0.079113221 1.023164 0.057483796 0.1039687 0.07967202  
0.02785961 0.143281 0.04519239 0.051513059 0.1083298 0.05152657  
0.03711615 0.1856748 0.07716877 0.002376844 0.0507558 3.428931  
0.07960893 0.04481687 0.04333846 0.028551741 0.059576319 0.3003191  
0.381928239 0.092097099 0.0825111 0.132209618 0.029662 0.9770743  
0.016120044 0.125721894 0.008827597 0.100657578 3.258164 0.01451116  
0.007677399 0.0163048 0.1110467 0.009303444 0.142917033 0.05366755  
0.07089435 0.029106203 0.01210948 0.114252 0.002652458 0.1060302  
0.07524369 0.029649379 0.056051 0.2036931 0.007585781 0.01375208  
0.04097667 0.009909054 0 0.008841659 0.04096258 0.507750537 0  
0.137345553 0.003227613 0.04408926 0.02830804 0.01582985 0.024950233  
0.1714719 0.3596017 0.05234004 0.02648761 0.08950685 0.081289727  
0.0087968 0.05359972 0.182271 0.03095837 4.099984 0.007359009 0.1113975  
0.1330457 0.189618535 3.476493931 0.2203347 0.01269063 0.2819009  
0.007363479 0.108338566 0.04995613 0.085748383 0.08104986 0.09468744  
0.068039114 0.201387331 0.06459776 0 0.10609327 0.07289276 0.03057358  
0.2729795 0.04420015 0.01325704 0.04882517 0.09110912 0.09075982  
0.004317102 0.05121732 0.03387569 0.1066956 0.4132991 0.019049589  
0.00991739 0.07600256 0.010343728 0.05059038 4.373117 0.3230869  
0.0072129 0.02213509 0.018211569 0.2229968 0.08143548 0.02928944

2.569337 0.02119395 0.012157236 0.007486916 0.02606399 0.005254409  
0.155587189 0.008899673 0.02947165 0.9205803 0.04490597 0.144687654  
0.01975147 0.0210296 1.007001194 0.117012 0.1664018 0.1480385  
0.01263426 0.01734155 0.05563325 0.0779055 0.07418244 0.012233001  
0.005661424 0.1448592 0.2767619 0.09421109 0.06349627 0.01761633  
0.01114835 0.042865862 0.0515446 0.004770669 0.059351166 0.03170342  
0.0155692 0.0928737 0.05762966 0.07734662 0.007453051 0.05345135  
0.08821644 0.021991265 0.006579171 0.335977348 0.03235189 0.06720664  
0.3205517 0.053217254 0.490960165 3.983789 0.03360869 0.09484485  
10.96708 0.07210309 0.058505466 0.02582311 0.07015241 0.04799486  
0.220776652 1.029244 0.2203212 0.187643339 0.1223689 0.094412893  
0.01474974 0.07476677 0.017093185 0.008000206 0.2498282 0.28920645  
0.97915261 0.3427076 0.08416803 0.1580745 0.003779471 0.04118746  
0.2008867 0.03397817 0.01572373 0.04467934 0.260610862 0.01633228  
0.016716705 8.587226 0.091748222 1.118044 0.3464098 0.117233876 0.005925027  
0.9206531 0.007405352 0.148871738 0.08610462 0.02079982 0.157413221  
0.04764958 1.632474 0.04067676 0 0.084197464 0.218853758 0.142993657  
0.06106814 0.02460881 0 0.02219811 0.04965666 0.05490863 0.009911076  
0.06541996 0.08390022 0.05357841 0.1117615 1.633628515 0.01930222  
0.02319847 0.1002274 0.04315479 0.09874895 0.06077105 0.0180009  
0.1127113 0.007471602 0.04840705 0.052135714 0.02087676 0.02631396  
0.1298579 0.05738043 0.204267622 0.01307838 0.08452554 0.04192148  
0.02687469 0.09870265 0.03224711 0.0910651 0.023897712 0.008997799  
0.04483267 0.014467091 0.06661532 0.02134993 0.2603626 0.01072924  
0.01820351 0.013432824 0.025065163 0.03749721 0.05309952 4.242545  
0.063097531 0.173950601 0.020493107 0.01451012 0.01150088 0.1258544  
0.301835 0.1253737 0.02115716 0.1601034 0.100368076 0.238008394  
0.1806518 0.047721761 0.122765 0 0.1021301 0.1208315 0.2484286  
0.008940441 0.02737042 2.447309 0.02703525 0.5013968 0 0.08658615  
0.1479466 0.003388902 0.04475371 0.1901034 0.069760272 0.02230634  
0.003901577 0.2989502 0.100789391 0.0658256 0.0333695 0.2731776  
0.3201265 0.01843167 0.01159788 0.05686297 0 0.272658646 0.164759089  
0.01971917 0.035106584 0.021356733 0.06830558 0 0.059463673 0.03037465  
0.06720377 0.0103305 0.031254979 0.01634447 1.015429 0.08858305  
0.089255046 0.06690819 0.03207009 0.2419833 0.06759495 0.02117964 0  
0.01235877 0.01882094 0.2345476 0.02808942 0.1552689 0.048243026  
9.619144 0.1137216 1.091879 0.0128426 0.002402053 0.3632887 0.03838353  
0.00438996 0.13823678 0.031384564 0.09790378 0.02395852 0.01002908  
0.0204942 0.07680917 0.204929096 0.1937551 0.003211279 0.01429405  
0.01012018 0.002712573 0.02753843 0.02070257 0.1503984 0.03672718  
0.06720708 7.690015 0.09674064 0.1108591 0.029395441 0.01910284  
0.448515 0.063638021 0.03410256 0.1123682 0.2723243 0.02490208  
0.02489126 0.106544779 0.043650433 0.073944477 3.861826 0.1080244  
0.05989687 0.002381024 0.6793817 0.03219833 0.0032185 0.04746618



0.028320286 0.006738155 0.1382928 5.898417 0.01810746 0 0.079952436  
0.8153231 0.03708056 0.06765173 0.04141633 0.02759396 0.1608744  
0.1033811 0.120114931 0.1268066 0.044837485 0 0 0.247416613  
0.03345947 0.02310369 0.01272906 0.021005396 0.05545274 0.09758151  
0.02728027 0.021491133 0.01839998 0.0536784 0.7704988 0.03417615  
0.00674951 0.02424103 0.004687324  
AC133552.5 5.358311 0.943769998 0.825802 1.996817907 1.979530089 1.577832325  
1.288353 2.128549713 0.4185229 0.4601199 0.979653953 0.3495688  
1.857616 0.5709158 4.480697 1.163781 2.046636 1.039260057 1.415166 0.4289597  
1.652708057 0.7142309 3.381080456 2.124053 1.590833 1.967118034 1.340222  
1.238224 4.959587 1.341129 1.976283 1.056887099 0.958471 0.536166483 1.050262  
1.054615439 2.303198559 0.696717998 0.7963407 3.60446 0.76981134  
1.226587 1.626971233 5.27593 1.475361205 2.967911 1.94921 7.370122 1.241277025  
1.583695 0.7980735 3.917059 3.893620701 2.173735 2.666070495 0.792152  
1.799177 2.391009 1.060136 7.502409 1.105939 1.623929 2.273017548 0.8456248  
0.6957326 0.7437658 1.227337 0.9914935 1.449532 0.1099245 0.4286097  
0.750706809 1.731942 1.899415 2.606885175 0.5772332 4.125997511 1.22098  
1.929797 5.513906 1.365853 0.2825064 1.678905 0.791694632 1.287114398  
2.183614 1.295287 3.543578 2.180804143 1.107966 1.256725 1.215337 1.366890192  
1.492147 1.060893 1.914718113 1.156489 2.461853294 1.716915867 2.838039  
1.400511774 0.9447525 1.286447 1.541355583 1.534018 1.010314 0.154902079  
0.776405 1.154435322 0.9367036 2.224816 1.054946066 1.519824 5.848583  
5.064119 1.727958 1.007096 1.038868945 3.499012 2.010115 0.7006195 2.364399  
1.018102 0.423737 1.820926 1.897325 1.290223 0.9660898 2.348176 4.291672402  
0.892529123 1.704728 1.602095984 0.405018048 1.67649 0.897126291 1.140561  
1.463782 0.743816276 3.827705372 0.439726745 0.645079778 2.400095 0.7304495  
2.710572 2.051841 2.523157 2.146413 1.873444249 0.5628057 0.6839845  
0.305233589 3.217101 0.8590494 0.611952798 1.773789 0.3506988 1.347362531  
1.959336 8.502546 2.068332792 1.124889 1.406349 2.935604 1.070962466 0.8654008  
2.445245 0.949815763 0.654387 0.758067312 0.541562 1.733847 1.550286308  
3.320118 2.466989307 4.945068 0.9937368 1.126657 0.6666543 2.331482  
2.229554019 0.8917605 1.226388 1.153465 1.014553 3.912778 0.41159 1.876221  
1.395236 1.657090822 2.26007568 1.680455 1.330853 1.250727 2.16216 0.927456955  
0.9167979 1.303889275 2.732018 5.16348 1.248657893 0.905111602 1.625831  
2.262424 1.564577724 2.002048 2.477533 3.240206 0.8294607 0.4865879  
1.927621 1.220855 0.8158186 0.2263649 0.8951841 1.065752 1.825583  
0.9767263 0.884699995 1.248031 2.578628 0.867788456 3.682543 1.766231  
1.420849 1.891023 2.966084 2.57826709 3.073514 1.345705 3.609074 7.396489  
1.333552 5.290901999 1.531032 3.689959 1.074497 1.835579194 0.653309351  
1.302492 1.309456 0.8476633 0.57321118 1.104702 2.499399 1.626938845  
4.772024 1.745038 1.065416 1.298443 0.6365063 1.127945 1.872260759 1.231743  
1.667720032 1.167625 1.519123 1.261901 2.120044 1.946414 2.147609 1.987497  
2.141876529 2.16217 1.450855 2.263306295 0.5818231 1.142908 2.175169  
0.8309894 0.7053266 0.3907967 1.261212 1.597928 2.306200075 3.380758

0.860032256 1.06628 1.328256 1.647179 1.054157832 3.198401255 0.5843016  
2.232188 1.187136 21.78231 0.7270551 0.613540467 1.196052 0.4414084  
0.7697787 1.543507178 1.616296 0.6931453 1.009125804 0.8555129  
1.0726059 1.211652 1.507829 1.147227964 5.732982 0.817223 3.46614466  
2.272818008 1.540259 2.460752 1.28933 0.5945236 0.4859195 0.9948197  
1.383381 1.731377 1.522779 1.691855786 1.918278 1.081055313 3.199683 1.862232845  
1.841086 1.688916 2.294915316 1.739783 1.487787 0.6601025 1.408889384  
0.3820257 0.5920549 1.007252759 1.099331139 3.75507 1.881939 1.304541  
2.275344893 2.744136036 1.57645941 2.216821 1.511552 0.1933693 0.5925542  
1.735813 0.8522149 3.603128 2.505581 0.1035121 0.4397251 1.305216  
1.55301392 1.189219 2.098288 1.565886 1.267167 0.3186368 1.547727 0.547443  
0.5628527 1.776021 1.725974 2.219127538 1.050875 4.461218 1.335104 0.6619166  
0.877923102 3.794526 1.950102 3.004111 1.155511 1.567413 1.69086 0.9115812  
1.848268764 1.226666 0.8660756 1.188432718 2.328626 1.04484 1.002297  
0.7032272 0.9544913 1.619988532 0.700948388 0.7864583 1.193248  
3.412129 1.033901499 3.004566457 2.406980639 0.6695307 1.778975 0.7541837  
4.478578 0.8507403 0.6339223 1.162376 0.814876728 4.46087929 3.624214  
1.809329822 0.6437119 1.299460117 0.6024526 1.103644 1.435543 1.734513  
0.975904 1.279039 0.7560421 3.010683 2.722337 0.942943375 1.819 0.1066171  
2.111973 1.035135 2.237738614 1.130634 2.209432 1.08682 2.351752451 1.300961  
1.911223 2.430725 1.220775 1.132133 1.520322 3.322331 5.513010584 3.280718262  
2.030177541 1.358924 0.903662846 1.759730848 0.9550843 0.04365225  
1.072573213 1.480254 0.9564582 1.029181 1.201814417 1.656893 3.743682 1.33151  
1.599013618 6.353911 1.651004 1.175334 0.3189874 0.6663259 1.515016  
1.244209 0.271388 2.72204 3.092993 0.8374051 1.517758126 1.709744 1.107402  
2.266227 1.649818 1.057983 1.29584 2.088093 4.097296417 1.932898791 0.559515076  
1.056904 0.3768757 1.603901 2.525316 0.6712412 0.58279842 1.286863  
2.222638 1.456173 1.538874 1.792127 1.110740466 5.997542 2.89692 1.880457  
1.409587 4.838088 1.664835 5.131331 0.809200342 1.631254 1.246234 1.652522884  
1.114963 0.7855951 1.132893 2.326568 2.871351 1.906022489 0.880302605  
6.796571051 11.60333 0.7080253 1.207946 0.9238729 3.018305 3.064918  
1.113818046 0.5973272 1.018257459 1.448577 4.060731 3.159105 2.872101  
0.837557 0.495449211 3.331249 1.555439 1.160929 1.737314 4.694303 1.600556  
2.013415 2.339317006 1.063845 1.24604546 0.7834703 1.979827 1.022127423  
3.579036 2.457471 1.156899 1.272736463 5.136821 2.258376 0.762894 2.704502158  
0.1653931 2.814598 3.379428 1.105072 3.362116 0.8473768 4.423991  
AC002091.2 0.1572985 0.385742961 0.4062818 0.468086375 0.111894683  
0.47327373 0.2567091 0.807850424 0.5559483 0.4231413 1.183028518  
0.8572662 0.4230136 0.9690421 0.2741039 0.3954674 0.5700428  
0.315545058 0.5874522 0.8328023 0.621336315 0.9092231 0.32663898  
0.6428742 0.5418451 0.668451425 0.7389903 1.138711 2.449425 0.1370384  
0.08468424 0.584968606 0.7182113 0.915712905 0.5580497 1.553179584  
0.497164316 1.405375332 1.098511 0.6547711 1.205189715 1.296072 0.448551066  
0.1328592 0.519949106 0.1478418 1.144087 0.08741216 0.256489415

0.5785214 1.094325 0.03770476 0.564231602 0.1804687 0.372789119  
1.262714 0.1593301 0.3216321 0.5510506 0.05932075 0.4284824  
0.5298285 0 1.123293 0.2009092 1.136186 0.863123 1.415838 0.9823965  
0.5840767 0.5060865 0.498603776 1.189986 0.4760572 0.692575464  
0.4856226 0.249127394 0.6564829 0.1098627 0.06658583 0.4884768  
0.3127248 0.8843846 0.306732435 0.353741167 0.1526643 0.5505937  
0.4818333 1.86512037 0.4905918 0.715449 0.9753686 0.675616672  
0.7870125 1.37216 0.238446705 0.4608696 0.350381039 1.46615097  
0.7539866 1.644057904 1.003976 0.6347204 0.737090043 1.230324 0.9394415  
1.337475414 0.773508 1.737970788 3.021817798 0.4489143 0.680653901  
0.351108 0.1644236 0 0.5488873 0.8262789 1.379990091 0.1810886  
0.6316491 0.6893879 0.07390043 0.6241865 1.092639 0.5581942  
0.1800234 0.9073473 0.4508938 1.30806 0.265157129 0.414959436  
0.614099 0.224016563 0.165541246 0.07183802 1.895894434 0.4591134  
0.2651491 0.314380964 0.847427309 1.629372394 1.674844172 0.1771214  
1.455448 0.3921457 0.5110461 0.5586095 0.08640014 0.995442019  
1.270933 1.382616 2.838216809 1.799353 0.6306219 0.738993202 0.8440215  
0.4658537 0.413026172 1.171215 0.1669127 0.810156377 0.8429134  
0.311356 0.1725457 1.58069087 1.436953 1.097352 1.299928765 1.390817  
1.158032677 0.04496177 0.9724497 0.306709549 0.2205153 0.297913227  
0.8957485 0.8800256 0.1534979 0.479676 0.3217707 0.217768116  
0.5310174 0.5090882 0.3502205 0.8086141 0.1181266 0.4783966  
0.8934639 0.7581979 1.240682111 1.525703157 0.4185462 1.193298 0  
0.2564396 0.739197036 0.05799219 0.746565527 0.6854963 0 0.579216336  
0.846071707 0.6299085 0.2691322 1.062252273 0.3868273 0.2710277  
0.4178791 1.166634 1.785193 0.4000892 2.080048 0.5418497 0.7517342  
0.4280851 0.6292001 1.212514 0.04054507 0.682373323 0.1726909  
0.4982316 1.921223198 0.207277 0.3000938 0.7743162 0.3014346  
0.2398274 0.29597575 0.3106423 0.5500241 0.5100152 0.05398455  
0.5314305 0.211693166 0.156443 0.1210268 1.134534 0.46443937 0.619877742  
0.7624506 0.4774895 0.750667 0.537479842 1.421582 0.2278498 0.707287932  
1.448905 0.283841 0.9300245 0.1407998 0.3220984 0.8783226 1.53743855  
1.076445 0.454426583 0.2891739 0.6726464 0.4470018 0.519489 0.340202  
1.288358 0.4659014 0.3512567 0.8975428 0.1993712 0.263067131  
0.07360662 0.6196697 1.078136 1.42999 0.1873853 0.6748533 0.3257607  
0.2606727 0.102115327 0.09165015 0.810757418 0.515055 0.6121386  
0.04465397 1.400299209 0.414499762 0 0.7282812 1.278602 0 0.8112632  
0.923668385 0.5695644 1.85677 1.06187 0.361823017 0.4002918 0.8769003  
0.536192218 0.6088005 1.315204479 0.9588555 0.4807048 0.714342039  
0.334337 1.021708 6.33088736 0.916517496 0.6062269 1.45673 1.101017  
0.7370909 0.7171946 1.360344 0.8352842 0.1460247 0.1555997  
0.345752388 0.4095258 0.582173797 0.1889033 0.494742457 0.08581128  
0.9735877 0.181456524 0.4126884 0.6727878 0.4642161 1.163370943  
1.291734 1.945456 0.631829778 0.199132574 1.178286 0.7666326 0.4520603

0.947342304 0.563348415 0.970437882 0.392631 0.5387002 0.2568637  
1.265021 0.645619 1.346218 0.7823669 0.7924546 0.5500044 1.005971  
0.7430548 0.838077008 0.5713842 0.121186 0.7693362 0.2404645  
0.7407116 0 1.404249 0.4112185 0.5897981 1.258744 0.640825279  
0.0581641 1.038594 0.8512782 0.7460408 1.072900651 0 0.6593833  
1.654612 0.8610597 0.3142771 0.4900511 0.7496087 0.665806911  
1.222089 0.525924 0.30229743 0.1031083 0.991373 0.4591066 1.233062  
0.6022555 0.779682994 0.426759 1.044698 0.8453655 0.4557851 1.098713234  
0.380108621 0.114190446 1.374491 0.3604753 0.7513696 0.1341915  
0.2054705 1.263114 0.3431225 0.947142167 1.763585007 0.3282447  
0.818191701 1.92393 0.287691419 1.022571 1.303142 0.4943854 0.4981739  
0.2796049 0.7520263 2.510737 0.2816384 0.6289111 1.484523346  
0.7817387 0.3776686 1.480658 0.3055624 1.543423045 0.9839945  
0.1087006 1.415924 0.666914874 0.5290232 0.5721216 0.4036093  
0.09009038 0.623559 2.154167 0.05658007 0.638941525 0.199906836 0.172136362  
0.588632 0.355670506 0.977522129 0.5814848 0.3479149 0.82834967  
1.368948 2.440734 0.2158612 1.451309133 0.1138421 0.4972951 0.7815287  
0.310838468 0.3624656 0.4061341 1.099982 0.4708106 0.4425597  
1.341656 0.5853507 0.2621822 0.08712879 0.6652023 1.328669 1.974123831  
0.3949831 0 0.1188301 0.5814313 0.8030745 0.3786947 0.4344404  
0.152884195 1.094998196 0.174879163 2.206202 2.058129 0.4191257 0.2141185  
0.8619272 1.790256715 0.1799384 0.6262793 0.8249301 1.339288  
0.3022967 0.737730608 0.2162955 0.04275719 0.4213361 0.6919873  
0.2661953 1.520404 0 1.484396647 0.4561872 1.335036 0.337714206  
0.5309499 0.637726 1.943814 0.6307174 0.2311626 1.134980968 0.795162891  
0 0.04293422 1.849672 0.9627511 1.724762 1.864832 1.000576 0.403513458  
0.08816272 0.056358777 1.314108 0.28897 0.5180769 0.8513211 0.03178788  
0.506256943 0.2212546 0.6887268 2.270357 0.2692405 0.08542076  
0.2298499 1.200112 0.546365002 0.3140373 0.780752225 0.3345201 0  
0.313327235 0.5593226 0.7356398 0.4137473 0.71527497 0.386238  
0.5156134 0.7178225 0.384915819 2.013929 0.5140842 0.1350103  
0.9521714 1.739426 0.4877686 1.240625  
AP001189.1 0.4656079 1.835051764 2.290677 3.04967355 0.867458427 2.763687212  
0.6030684 2.41403382 0.8955769 0.4638926 0.155635449 0.3222263  
1.729135 3.705748 0.3422043 2.716185 0.6675202 0.733874603 0.7838738  
0.9514492 0.607218996 4.190221 0.575512229 2.456687 0.5193506 2.929407615  
3.020739 0.2675094 0.1428644 1.004436 0.8474957 1.121367589 1.647362  
0.903511962 4.539759 2.077654795 2.404185578 1.565416877 2.936211 1.638191  
2.162057795 3.215276 0.885149159 0.243451 2.469267416 0.8891246 1.714484  
0.04928428 1.322171844 1.4085 2.872891 0.4145409 2.770313859 0.4239622  
1.090329745 1.156897 0.1908945 1.507397 1.130568 2.642228 0.2415847  
0.5867816 0.407860004 2.504529 0.9401872 1.517939 0.4325703 1.243817  
2.514659 0.5214093 1.890371 7.254463498 0.9952155 0.6710203 0.637106034  
2.240847 0.026336574 0.3265895 1.125283 0.03754208 1.98689 1.234232

2.503986 0.889407293 0.58171321 0.4303721 0.5529587 0.1567297  
1.879424208 2.723475 0.1536689 0.6257794 1.868902115 2.095389 1.923656  
0.436929342 0.2454093 1.317000259 1.07922146 0.7793662 0.939140923  
0.8915389 0.3028087 0.60028558 4.389663 0.3657253 1.073125974  
0.8722306 1.945377334 2.585684801 0.8436818 1.07227838 2.610596  
0.2433492 0.291751 0.5626742 2.673197 0.793620108 0.459452 2.331053  
0.1457577 0.8229067 1.456581 1.288096 1.489666 0.7104991 0.2084198  
1.300436 0.3403862 1.195996249 3.175175484 0.941335 1.878770048 3.371712986  
1.063213 1.679752592 0.9318778 0.8346803 0.734332453 0.652982557  
0.207999482 2.690162798 0.7614606 1.196713 1.025089 0.5122407 2.156212  
3.044605 1.552777859 1.549058 2.249529 0.881758744 0.1585159 1.955547  
0.822894324 4.054825 2.265401 1.086728049 2.109446 0.1097925 0.268108949  
1.501349 0.8484778 1.186863 1.570769985 0.3819398 1.175536 0.82992317  
0.2042091 3.193611062 0.03802517 0.6348524 0.444670466 0.621649  
2.785467782 0.8080581 6.803275 0.9087161 0.9881771 0.6122895  
0.712129229 1.232128 0.7558496 13.9209 2.933012 0.1332031 0.5490873  
2.346406 4.239209 2.425737566 0.249739584 1.927191 0.4734513 0.9651156  
0.2747104 3.655422649 0.6539372 2.609733407 2.296223 0.7436882  
1.573477401 8.749694247 1.103507 0.1770309 2.005058653 0.4089355  
0.2619591 0.2002655 2.3844 0.520613 2.436223 0.9143568 0.8995363  
0.1695356 1.944295 1.241633 0.3087376 2.84606 2.041218189 2.658083  
1.667905 0.21664284 0.5258962 1.722737 2.401141 0.2124417 0.7919927  
0.369510098 1.788979 0.7558974 0.8482847 0.03043729 0.1498142  
0.525165318 0.05880326 0.06823673 0.536495 2.90225752 0.733942202  
1.454982 1.278775 0.799448 3.270297229 1.551308 0.8350231 1.262801596  
1.033907 1.21359 1.561686 0.1686931 1.032872 2.417796 1.070790879 2.876781  
0.288239022 0.5409982 3.456992 1.953203 0.8170247 3.797856 0.5361491  
0.8756071 0.138630625 1.543446 1.423841 0.328425424 2.189152 0.9782611  
1.179266 3.408879 0.1320633 0.5414699 1.31192 4.556106 1.712830645  
0.8913716 3.438767168 0.5626416 3.796461 3.990486 0.940445154 2.29319232  
4.92313 0.3666212 2.150669 0 3.28894 0.781166951 0.9549359 1.349917  
0.7539164 1.428008374 3.929066 0.8157755 0.717993717 1.361561 1.498512257  
0.4923476 4.223528 1.087442987 0.785434 5.940559 0 1.595833822 0.4272497  
1.111795 2.000257 3.576981 0.8592755 2.213291 0.7927585 0.4734028  
1.359806 1.87630074 0.6926902 1.20354022 0.465966 0.557886305 2.044126  
1.778034 1.064002012 0.03490198 1.102421 0.2617319 0.941110978 1.742715  
0.9218436 1.194435074 1.740245538 0.3100231 0.5449968 0.8283545  
1.348031466 4.857782063 1.238280743 0.5349804 1.573859 0.1810295  
0.8955095 1.833048 1.121276 0.298398 1.038805 1.317928 1.134363 2.044852  
1.87190725 1.980305 0.3530201 3.630759 2.76804 2.296933 0.3750247  
1.484506 2.603056 0.4694639 0.747718 2.288276521 1.524911 0.6027976  
7.519425 2.170745 2.93253405 0.1027194 1.102033 1.646285 0.9181872  
2.403195 1.070655 1.495497 1.888690169 1.033548 1.695745 1.174140743 1.235347  
1.36943 3.610973 0.5372143 1.224205 0.940737288 1.049947937 1.234669

4.989716 0.8565946 0.913719512 1.192104333 0.43458033 0.3418935  
0.6548888 4.636432 1.034008 2.012847 0.7596399 0.7859213 2.581062033  
0.636374685 1.249217 2.248879644 2.500929 0.08110235 0.7520096 1.959282  
2.946699 3.300314 1.425974 1.798089 0.6724056 0.6986845 0.08864736  
0.993933145 2.904982 0.5855718 0.560206 0.5168418 1.369766907 1.562174  
0.1685394 6.801363 1.236896451 1.063834 0.2520083 0.9590067 0.9777902  
2.06807 0.7970495 0.06380137 1.260856558 2.400732507 2.960117718  
0.9181999 2.017856462 1.857107259 3.263595 0.4413591 2.344520011 0.35785  
1.611759 0.8620824 0.831907493 0.3851152 0.1246144 2.098826 0.788649073  
0.1751687 0.4007228 1.250375 0.4645375 1.150573 0.2406872 1.349238  
2.152661 2.087791 1.025875 5.6794 0.663087877 0.2505345 0.2232963  
2.389601 0.6934646 0.4810844 0.86376 0.6971482 0.586148996 1.128308341  
1.503641951 2.137228 0.7213319 1.762473 0.7243393 2.178474 2.768956625  
1.737364 1.488088 1.860432 1.629449 0.3089214 1.139685148 0.2845514  
2.916964 0.7211508 0.9065313 0.6217801 2.454785 0.4803876 1.948014848  
1.971906 11.15521 1.380460103 0.7483937 1.487268 4.481027 1.751369 0.2280826  
2.153574039 1.621880385 0.444118304 0.03631043 3.977057 1.094674 0.4581718  
0.7622797 0.5738661 2.110758335 2.870605 0.174767541 0.7276829  
1.507061 0.7594586 0.7288699 0.3136434 3.953277394 0.4989865  
0.7766288 1.545734 1.919208 0.09632299 2.770046 3.238211 1.675014865  
3.773567 1.250167181 0.2619547 0.04732301 1.884357902 2.838189 0.55734  
0.8997823 1.695620282 0.798478 2.008545 3.463919 1.024822622 0.4851609  
1.159393 0.095151 0.2348712 0.7289092 1.068313 0.2761116

MALAT1 53.93126 30.914104032 19.17929 39.525523609 36.167722756 43.473124765  
17.01877 16.621713941 5.944206 9.112303 15.238758577 41.2243 20.52563 38.27936  
90.01274 73.10953 46.14554 21.990318856 30.01647 20.47019 13.795043004 72.22663  
35.466893262 50.86548 32.74417 26.130929162 21.39254 6.849437 30.21546 50.36179  
132.8963 22.556843793 95.34942 99.252959076 22.32927 56.14027011 45.22071901  
75.249947209 35.96367 65.8402 49.7490751 58.02515 9.380518339 63.83355  
34.950146067 41.77353 63.07231 30.3875 19.152973019 10.7559 53.05373 75.72771  
32.155658906 25.8622 17.487375751 63.8983 15.13111 54.58532 5.930597 48.01257  
9.508387 65.45951 53.540954307 10.03188 10.53318 33.45899 7.471308 28.43831  
42.29537 13.28873 19.21183 74.974688192 5.270952 2.373881 25.758586261 21.30177  
7.358193126 35.09587 8.402492 194.2211 11.78494 12.61318 37.40169 10.271344874  
76.535123843 15.85857 6.917624 14.97465 43.758406754 12.42066 10.8815 9.704583  
56.939003403 61.90394 20.59922 48.812804989 173.9716 44.033711878 6.900371299  
4.477587 6.351057602 3.683324 13.27631 48.698737923 29.61081 24.25064  
15.627080835 63.23187 60.1845966 27.779714055 4.816483 53.684021726 27.45322  
72.1815 69.43551 12.8673 42.77998 36.515682148 38.99447 57.63198 14.13525  
3.481483 21.35369 90.68659 88.14975 605.3488 39.64864 55.3421 44.08989  
89.745844969 91.420218693 12.00502 48.077152895 30.548798122 12.16838  
35.885759597 25.77144 4.772501 22.714992869 63.297815739 5.266712797  
52.510565627 60.71554 33.7135 65.41582 61.59436 121.3259 75.92829 17.231664162  
26.15249 78.48568 28.295684171 31.19945 35.51388 19.529602521 63.68352 17.07669

22.574392427 24.74396 13.78255 8.751620065 59.05486 81.75642 15.32887  
48.381815052 31.57238 50.28591 7.719106007 27.72658 24.660687283 25.96512  
5.487447 25.554728337 23.58861 75.315220058 38.1684 192.9892 34.35951 37.66123  
19.33814 22.928109765 12.09936 37.31526 140.1454 117.4707 76.29362 2.086804  
31.75754 36.58746 46.237743006 8.578363744 106.3473 11.46375 68.10536 8.232966  
50.521816646 31.9723 54.592582418 26.43216 13.12754 7.86626967 51.738359368  
15.40991 5.247878 21.955126793 33.90506 4.522751 17.61421 68.18894 89.92678  
78.43021 36.76926 5.960119 24.05565 67.32036 74.65127 5.594393 3.740141  
61.520923784 82.98097 43.0633 6.263341236 23.96496 90.23057 33.09632 30.04851  
10.14998 92.390101848 101.9117 23.72257 32.25385 1.065879 20.12852 24.150894519  
17.66382 17.80509 10.93805 60.692332081 14.589974978 93.84473 10.09476 66.48703  
48.396023299 67.56515 104.2204 14.150632779 19.60313 59.12212 4.53772 18.25407  
13.51591 23.07328 58.132066441 29.37331 10.338970369 20.63022 106.957 54.02386  
10.71384 49.17467 12.98357 21.58753 32.076400754 142.5631 127.4849 4.336416014  
95.09989 3.873895 21.6037 35.50724 36.55021 135.2415 15.68008 144.653  
51.949454997 6.18615 10.48623652 119.9004 73.67098 17.94884 57.184621929  
28.903120495 5136.705 21.40651 52.82251 2.194821 12.53035 7.898560896 13.36391  
3376.983 7.104148 22.760754825 7.853292 2.76817 19.117533931 3.997431 9.516417015  
13.54157 70.15142 39.913435127 59.92421 64.75366 29.83566663 52.277465844  
5.504547 7.256545 30.15135 64.33398 104.0213 56.68373 56.21845 27.30931 28.43317  
47.29990411 5.967149 6.593758276 98.13975 11.316802823 34.86454 4.410133  
46.453508442 10.89582 17.17603 9.224759 24.521212273 5.946034 5.718942 6.257948451  
42.587349756 10.39497 18.40562 21.04998 56.639522694 85.639731417 91.149415758  
4.446978 10.27414 18.33721 9.000669 12.30253 12.14781 16.96652 11.42547 88.95526  
29.76625 12.40941 13.714272574 52.6696 19.94114 66.97157 16.54357 3806.353  
543.6867 24.76775 15.24273 38.89068 32.90109 64.425989733 102.424 10.71594  
55.14151 28.91546 94.479727766 14.37451 305.6882 52.86464 11.47259 82.52105  
5.987272 9.466685 71.612067689 38.99505 8.189411 8.115451601 15.6069 47.45057  
41.53515 42.11351 64.31194 14.712535282 38.488791785 31.30716 54.23611 57.96621  
3.879543253 27.938374369 43.13612902 15.67776 10.26948 22.18181 16.75755 96.5127  
15.14712 9.354546 82.708870939 26.518629911 10.76635 26.408375419 4562.033  
22.304776505 19.71822 47.95096 12.7966 104.7536 90.65507 73.31722 45.43172  
10.31188 23.28968 35.002364451 225.9088 23.59279 9.262306 37.87504 63.837011386  
22.27696 19.93971 24.17899 40.935803892 34.33932 10.31421 11.69922 6.368366 55.0588  
13.65729 13.46526 56.482486959 95.287677134 98.04285531 12.28873 14.202008631  
7.199085305 44.87511 44.9725 72.908561944 79.05985 9.492197 6.961258 42.82457677  
22.33776 5.074246 3.386426 14.234591136 9.089562 32.99818 7.23397 6.587014 16.9521  
113.6823 35.82115 23.12148 138.1968 100.5216 46.67962 7.558257773 50.33727  
21.06091 11.8583 23.29037 7.949521 13.95022 7.313256 2.813586072 6.194672122  
9.66594389 6.964005 24.94861 6.625034 37.0979 75.83321 32.747712839 5.605877  
138.0955 18.61639 12.07903 25.8957 7.900793992 58.42239 167.9927 59.13896  
19.39131 67.7317 202.248 90.93994 61.854991558 9.663352 28.02162 16.278152607  
6.210338 30.03291 50.65561 114.9077 39.70597 34.81448289 62.084059669  
48.930591201 2.430729 84.19511 16.51252 11.38888 27.40058 18.76536 28.496023598

22.25462 6.622191733 8.945314 17.92799 51.16158 26.99077 9.0845 31.223499606  
12.43494 28.06631 26.84855 42.23952 10.81163 64.10985 53.00008 41.105432372 74.284  
28.379900148 6.067213 1.86788 82.146157798 110.029 8.820305 20.7674  
42.712332318 9.801402 73.01224 70.68753 17.159522294 14.02728 23.60715 8.238757  
6.282999 20.81116 51.22467 73.95745  
AC124312.4 0.1529855 0 0.3161135 0.337223518 0 1.008269335 0.05548229  
0.523799791 1.029913 0.1219375 0 0.2779202 2.011361 1.038085 0.6601231  
0.2797265 0 0.153446508 0.7110067 0.3410389 0.698301846 0.4101068  
0 0.8336627 0.07026508 0.472816668 1.306778 0.2461086 0.2190587  
0.1777079 0.9883471 0.556286274 0.3810101 0.065970715 0.8270452  
0.987315295 0.198372263 0.75565185 0.8441607 0.4776133 0.37887489  
0.6242646 0.158637122 0.7322258 0.363061237 0.383435 0.5465978 0  
0.475155506 1.023016 0.8425863 0.342262 0.24389366 0.07800904 0.181283741  
0.2729091 0.3099228 0.2606776 1.23068 0.1538512 0.2381335  
0.3926102 0 0.198635 0.1042135 0.2562393 1.036366 0.1280946  
1.324904 0.3787078 2.296979 0.969864765 0.2057524 0.6790726 0.189076629  
0.5634541 0 0.3004624 1.092247 0 0.361968 0.1622134 0.9972583  
0.170469731 0.535176153 0.06599038 0.1338742 0.1922551 0.051460425  
0.9787488 0.220899 0.2180746 0.164272925 0.226795 0.4328227 0  
4.117101 0 0.052812965 0.1303667 0 0.06509649 0 0 0.1495737  
0.4640928 0.066707831 0.7522989 1.524599422 0.138304071 0.1455351  
0.519208479 0.2845673 0.1066101 0.0838784 0.1941226 0 0.572651372  
0.313108 0.2233926 0.2234951 0.3354126 0.08993655 0.6869847 0  
5.524976 0.1307361 0.5847075 0.9133698 0.429811152 0.845599366  
0.2488587 0.145249449 0.26833702 0.5123673 0.842930391 0.1786099  
0.3438385 0.11648032 0.512830204 0.15946627 0.202036716 0.5167946  
0.1048548 1.201967 0 0.2228893 0.3921452 0.043028784 0.581687  
0.8196302 0.075112782 0 0.6620077 0.047915366 0.5928571 0.5537648  
0.059511298 0.08437785 0.07214937 0 0.645904 0.3364653 0.9397619  
0.409959826 0 0.0569207 0.099159652 0.3381703 0.391749624 0.233221  
0.3318546 0 0.5242573 0.25755079 0.1548778 0.5705973 0.04976302  
0.6220315 0 0.112958429 0.4767298 0.264069 0.3406177 1.04859  
0.3829588 0.4431231 0.9756807 0 1.608884544 0.255289352 0.18092  
0.2865627 0.06528723 0 0.758869215 0.1504056 0.619601222 0.3137414  
0.08552414 0.102424472 0.635200185 0 0 0.179674087 0.3135173 0 0  
1.134646 1.676374 1.089533 0.09143568 0.1561459 0.1559727 0.5551296  
0.1359884 0 0.2103112 0.786563658 1.433223 0.08076173 0.498278533  
0.05375828 1.238217 0 0.1954463 0.622004 0.109661061 0.4603805  
0.5349428 0.1984123 0 0.4594302 0 0 0.1569445 0.1898367  
0.150568247 0.160768292 0.7605587 1.061479 0.2704015 0.522742491  
0.5352012 0.2954697 0.203820608 0.3522941 0.3067314 0.2097447  
0.4108174 0.7831668 0.3349959 0.410469837 0.44669 0 0.3749933  
0.4025864 0.2898302 0.6382042 0.3529321 0.8751338 0.06712988 0  
0.2909776 0.5170789 0.09746819 0.4772558 0.2812501 0.1677718



0.6831903 0 1.952218 0.1206966 0.5311957 0.264841041 0.1782743  
0.143368541 0.5009325 0.8405 0.1737183 0.961343935 0.134378149  
52.17059 0.06745831 0.6632231 0 0.6512537 0.140916391 0.466482  
23.31776 0.2550011 0.312801834 0.1415695 0.5117137 0.217287572  
0.5789497 0.497444275 0.2220391 0.3636299 0.185268064 0.04817328  
0.9522896 0 0.489389039 0 0.5068183 0.2115215 0.1365486  
0.1860079 0.3528118 0.3971642 0.3787222 0 0.16813604 0.1770208  
0.553628501 0.1837237 0.481176938 1.112779 0.1097846 0.18824651 0  
0.4362269 0 0.065592583 0.3589473 0.05367697 0.192786012 1.032919932  
0.1018647 0.3457911 2.442584 0.175498436 0.902426437 0 0.5940127  
0.2540264 0.08327355 0.03645437 0.2392063 0.3174073 0.298398  
0.05138173 0.3566157 0.7153807 0.3211914 0.585198189 0.4794423 0  
1.330207 0.9354845 27.71832 4.077541 0.5528017 0.1454339 0.4049127  
0.05829666 0.332402274 0.07542571 0.1584496 0.3219754 0.8983431  
0.241966935 0 0.9161478 1.178009 0.2427391 0.3566031 0.3707  
0.4860366 0.43170061 0.3250818 0.596754 0.784023012 0 0.5142348  
0.476286 0.5814555 0.3699424 0.970629875 0.100620011 0.3647371  
1.096248 0.3611974 0.356195742 0.246457525 0.074039612 0.05242366  
0.2596973 0.4330474 0.05800535 0.1332244 0.2729956 0.1112381  
0.40940984 0.457394305 0.2128296 0.132626235 19.5434 0.279803106  
0.05765407 0.07041169 0.6411062 0.4037619 0.5603578 1.264159  
0.3798502 0.07304428 0.4077779 0.42111378 0.1843161 0.5509698  
0.3536987 0.3302045 0.444771372 0.7723271 0.2819204 1.080078  
0.091035579 0 0.09273906 0.07477001 0.1752403 0.5232216 0.872959 0  
0 0.259234027 0 0.2035527 0.230612167 0.165342453 0.4113024  
0.3759726 0.343738392 0.7746401 0.4335727 0.04665387 0.313670038  
0.5413008 0.5015729 0.5334033 0 0.134296 0.1579993 0.3220967 0  
0.6376667 0.3163317 0.5358125 0.1699956 0.4519454 0.7103906  
0.2804857 0.59914726 0.2987856 0 0.7704789 0.5799886 0.2169597  
0.2678627 0 0.27755879 0.685500539 0.963809841 0.6762234 0.1442664  
0.9058523 0.09255447 1.580232 0.25097932 1.225032 0.4640816 0.07377573  
0.1828162 0.04900133 0.497468408 0.2804864 0.388125 0.1951349  
0.2639268 0.4438224 0.9858104 0.2071671 0.796521627 0.7394647  
0.1384992 0.054742383 1.195854 0.3007224 0.5285313 0.3680541  
0.2498048 0.396257623 0.242622757 0.23572433 0 1.097668 0.9987766  
0.4731325 0.3022833 0.0894842 1.39537557 0.1714907 0.146169216  
0.06086075 0.1249096 0.7390116 0.08177564 0.2061085 0.590850845  
0.09563907 0.2232808 0.1666494 0.3990218 0.1661572 0.2980634  
0.6669749 0.265692013 0.3054266 0.566977228 0.09639935 0 0.677191121  
0.6648721 0 0.07664812 0.716743276 0.04173862 0.4862794 0.8213415  
0.055460989 1.044644 0.3030232 0.04376946 0.05144797 0.5486699  
0.5838699 0.08467423  
AL138756.1 4.54053 0.957956272 1.209066 1.145695284 1.274294407 0.817743524  
0.7433205 1.198695676 0.2376723 0.726935 0.678553454 0.7868467

0.9494188 1.043688 1.487555 1.216332 1.049775 0.737723596 0.71296 1.267965  
0.96756814 0.9956919 0.719537853 0.7778476 0.8017426 1.025446405  
0.58079 0.8151033 2.316967 1.26446 4.339857 0.758572192 0.8249791  
0.51592482 1.225988 1.134146801 1.614953679 0.814918662 0.5986236  
2.156744 0.935043798 1.12971 0.413541215 6.529842 0.887704672 0.8684638  
0.8809635 0.5667692 0.548256353 1.604474 0.875562 2.078019 1.035766346  
0.5400626 0.584911215 0.9271913 0.3311141 0.6316419 0.37409  
2.125317 0.6971003 0.8462512 0.800033084 0.7724696 0.4442436  
0.8746631 0.4703509 0.6842658 0.4899794 0.6190416 0.757246  
1.360850133 0.5407596 1.056599 0.436330683 1.608351 0.887902704 0.5264512  
1.379008 6.392984 1.015135 0.9410454 1.390408 0.400676719 0.56360126  
0.1226744 0.7637695 2.184436 1.524020272 0.6556362 0.5210951  
0.3830285 0.589697679 1.085515 0.5857287 0.43937109 1.200396 1.038826166  
1.056259301 0.3760578 1.269544648 0.4256309 0.2110485 0.496981996  
1.000354 0.6544898 1.180215468 0.5813706 0.871078265 2.331664783  
0.6219449 1.005134362 0.8464054 0.8679156 1.548524 0.7217379  
1.193823 1.739061458 0.5770421 0.4296012 1.151859 2.945611 0.2363717  
1.076166 0.547529 3.152569 0.6257453 1.62611 1.639382 0.402259155 0.6923468  
0.4690029 1.080060006 1.554978627 1.260017 0.787995825 0.7289421  
1.965316 0.336000923 0.746703318 1.272663498 1.003708046 4.030556 0.7259181  
0.3407944 0.8685107 0.4965003 1.630347 1.850789365 0.7706109  
0.9949838 2.378571427 1.117131 0.9336006 0.463796168 1.069949 0.6357323  
0.911743603 0.4813864 0.3191222 0.696879576 0.554178 0.3839156  
0.2467018 1.711450875 0.4061264 0.492583 1.245852032 1.228396 1.494173244  
0.9194291 0.6934911 0.848642816 0.2077477 0.524181896 1.394893  
1.834465 0.2583849 0.4232759 0.69544 0.488762435 0.312387 0.8125199  
0.7314546 1.035146 5.616729 1.357775 1.250873 2.409008 0.47574543 3.068381639  
1.101756 0.367388 2.573823 0.0980579 0.975469538 0.9062899 1.112104757  
0.8178729 1.293827 1.413807887 0.677398799 0.7592508 0.3355805  
0.698732561 0.8601627 0.2285145 0.3369474 0.8377844 2.031503  
0.8680346 1.172252 0.8257717 2.597046 0.8105525 1.603966 0.7673205  
1.604297 0.753159913 0.6316286 0.6160671 1.066028592 1.233684 3.002563  
1.053997 0.9855841 0.5525127 0.840031849 0.970193 1.28592 0.6995307  
2.06876 0.1227111 0.57367272 1.317796 0.759571 0.943099 0.344247916  
2.277550801 0.3559025 0.8930713 0.6690705 0.778156558 0.4574369  
0.8929029 1.28367787 0.7264185 0.5466111 1.263846 1.187976 0.7095357  
0.8933224 0.443547992 0.9986098 0.897154219 0.4392404 0.8473239  
0.4598267 0.6454772 0.6504358 0.5584333 0.3399526 0.694930439  
1.514576 0.5137643 0.359257753 0.4160692 0.6825208 1.132818 2.865395  
0.3504756 0.6861245 0.3752427 0.8172242 0.505065447 0.4609229  
1.488827152 0.1659071 0.5806873 1.878237 0.636787649 0.689118711 11.9899  
0.6789073 1.169143 0.5868793 1.159283 0.754264017 0.7625186 3.558102  
0.6113489 1.944985764 1.697019 0.6523986 1.161652791 0.826589 1.065952018  
0.6746573 0.5327911 0.657147408 1.936195 1.170456 0.43058032 0.784277306

0.5039355 0.96579 1.233875 1.48803 0.7392621 0.8755677 0.5994494  
2.054447 0.7631335 0.901755259 0.8094543 0.880772615 5.704073 1.230359835  
1.640635 1.551764 0.847712648 0.3636369 0.8528796 0.7031715 1.215144653  
1.154307 1.107948 1.461342687 0.789036059 3.777484 0.5125909 0.947806  
0.742493384 1.038506614 0.713285151 1.485032 0.6757753 1.142342 0.6332778  
1.299534 0.9105114 1.063521 1.534865 1.291589 0.771489 0.6323824 1.42012381  
0.5867301 1.413686 0.9166491 0.4830672 1.38099 0.6031866 0.792099  
0.7240619 0.5046988 0.7772888 0.426156761 0.4254783 0.8735045  
1.279646 1.25582 0.853088553 0.6714073 0.9239781 0.7038926 0.6535285  
0.7576184 0.4107573 0.6614699 0.667613924 0.6564151 0.6530413  
0.778997224 0.5914015 1.285587 1.526558 0.997047 1.127745 0.254064444  
0.445050047 0.6713568 0.447986 6.12941 0.936155476 0.327820105 0.887526116  
0.4906317 0.5993014 1.093028 1.695541 1.810486 1.480476 1.354823 0.738587348  
0.797508019 0.6366698 1.509048512 3.749462 0.454381112 0.6282815  
1.385666 1.268122 0.3985854 0.8980093 2.403291 0.5009013 0.8240894  
1.834129 1.349723653 0.7207232 1.141967 0.9878947 0.3640716 0.874336885  
0.6586736 1.617428 1.590115 0.612739472 0.5130519 0.2407649 0.5032597  
2.096893 0.6525025 0.6916521 0.6631661 0.853893699 0.501850487  
1.206734272 0.41102 1.112408049 0.420422049 0.3866946 2.130511 1.236687003  
0.960024 1.828788 0.5712108 0.828410614 0.3596054 1.506556 1.832719  
0.456487759 1.958483 0.9452948 1.017613 0.6535856 2.031541 2.078462  
0.6554544 0.4495075 0.7315143 1.512507 0.3981253 0.677357625  
3.324401 0.3715471 1.399374 0.6283209 0.2364304 0.4235435 0.3500235  
1.164120198 1.079726124 0.861323274 1.350446 0.7352037 0.9174658  
0.5932979 0.9808505 0.868774568 1.226528 1.364727 0.8016017 0.6738418  
0.9234865 0.716276011 3.260355 0.5544643 0.4578165 1.877941 2.117956  
1.5511 3.342119 0.485061247 1.48525 0.8167904 1.322940932 0.50408  
1.084336 1.839956 0.699932 0.333073 0.584225983 0.933164449 0.564126603  
1.716676 1.198782 0.6215677 1.000857 1.650932 1.485667 0.741665968 0.6815656  
0.67462715 0.8543914 0.8687622 3.303158 0.8754187 0.5786892  
2.062086283 1.029959 0.3578218 0.7798339 0.7225876 0.3301841  
1.581074 0.8607966 0.641521314 0.6787257 0.882656857 0.6086754  
0.8139962 0.743752642 0.9763857 0.2446048 0.7615679 0.497287944  
0.5431372 0.4325081 0.5089509 1.041671139 1.278411 0.4739594  
0.8753892 0.4913941 0.9769762 0.5832461 1.777616  
AC243964.2 3.199604 0.874858508 0.149734 0.56029521 0.253775246 0.230009317  
0.5822119 0.229023886 0.1801259 0.1732751 0.380104226 0.3544234  
0.5896237 0.2508326 0.4329439 0.4484567 0.5469739 0.167730668  
0.2442608 0.4349168 0.234863374 0.280177 0.324105109 0.2430046  
0.553003 0.120593814 0.3332989 0.2869532 0.4908737 0.3367008  
7.694501 0.143725714 0.4257329 0.764385643 0.6102228 0.21584467  
0.715567084 0.291527512 0.7958655 0.8933262 0.10353598 0.5668976  
0.358369239 31.07388 0.215437304 0.1536804 0.3072754 0.3964986  
0.21814262 0.1490996 1.357295 1.143747 0.25326757 0.3410832 0.40952909

0.835279 0.2371412 0.3989213 0.3818752 0.4540673 0.1561807  
0.3004105 1.123484608 0.1881756 0.4556586 0.6302078 0.163129  
0.4387254 0.3342088 0.08279225 0.3586861 0.416206396 0.236151  
0.4183798 0.475358381 0.5651838 0.423762534 0.4817004 0.2491667  
4.945759 0.2571811 0.2837018 0.9810828 0.161493422 0.95270629  
0.4183735 0.2926728 1.712738 0.168752451 0.2353691 0.2704377  
0.08581498 1.532287178 0.2231164 0.2523273 0.394328296 0.3048629  
1.059544355 0.450288256 0.1567526 0.441556046 0.6119438 0.525984  
2.48434345 0.2724956 0.2663297 0.277086829 0.5390827 0.681100557  
0.251964398 0.3287711 0.976170524 0.1741921 1.864549 0.6234685  
0.4951176 0.08923745 0.297330446 0.2566912 0.4720968 0.107492  
0.9427777 0.2359407 0.09386691 0.4114419 10.7006 1.257574 0.2556549  
0.4564088 0.45102891 0.260488842 0.1958577 2.016386041 0.445840634  
0.1629274 0.460698909 0.7158672 0.187923 0.31830835 0.400406415  
0.383483766 0.750869883 10.67038 0.5501552 0.3537307 0.6117176  
0.3898206 0.2571897 0.376274275 0.5086684 1.030318 0.623997582  
0.4463486 0.2383733 0.167602407 0.2293084 0.2311199 0.364286365  
0.3504834 1.009481 0.209705652 0.2389642 0.5149011 0.9391938  
0.537747021 0.5004869 0.6844132 0.238458682 0.6653704 0.199834669  
0.7138077 0.1741184 0.658347134 0.5626406 0.380059963 0.9649827  
0.8060298 0.1523071 0.324277 0.9578239 0.605020643 0.1505423  
0.2116773 1.712697 0.3056539 9.946126 0.125937 0.2666264 0.5254272  
0.385769214 2.804492163 0.5141801 0.1879431 0.3710967 0.3635004  
0.148438897 0.6083046 1.227568535 1.66901 0.7104897 0.276165655  
0.138866049 1.160755 0.6485365 0.327332904 0.2330375 0.2305073  
0.3672503 0.3582998 0.3490334 0.408328 0.5097313 0.2730902  
0.2983611 0.606806 0.3567538 0.4768078 0.01149444 0.483628483  
0.6266559 0.6179583 0.381263898 0.4230906 1.693785 0.1920774  
0.9542596 0.1165552 0.38358171 0.4403322 0.3898266 0.809694  
5.494317 0.1673994 1.260305857 0.3843776 0.926393 0.6329005 0.296252052  
0.316321251 0.5985779 0.3384182 0.5675 0.266655197 0.7280279  
0.9320125 0.545845388 0.2952347 0.3889303 0.1948791 0.6286839  
0.1940427 0.1757665 0.833262866 0.2075155 0.499212278 0.4248065  
0.9681379 1.23556 0.1395228 1.562434 0.3043724 1.3942 0.34853186  
0.2417289 1.733321 0.287661761 0.4277801 0.5445926 0.2078415  
0.6329915 1.925721 0.5739585 0.3694099 0.4750725 1.375100257  
0.2728175 0.167162191 0.2007734 0.2245812 0.7342397 0.583796858  
0.367218143 8.324856 0.2949517 0.2174885 0.7546696 0.1533276  
0.338875102 0.8583422 0.3601619 0.100346 0.649648379 0.8459558  
0.1988795 1.368084236 0.8514621 0.15535737 0.3786252 0.4088364  
0.445531805 0.2106307 0.1538777 7.99498777 0.397388238 0.7304222  
0.3525438 0.2658935 0.4179274 0.4981417 0.5729726 0.355202  
0.7348092 0.3528975 0.281807703 0.1547996 0.462126111 12.35752  
0.42077532 0.2067822 0.3240118 0.226347179 0.5498826 0.2503383

0.2193405 0.516229358 0.1569445 0.1173474 0.273951914 0.357539868  
1.492053 0.1700912 0.206477 0.9463879 0.253654016 0.405435706 0.2411718  
0.1943714 0.1456406 0.4064482 0.209179 0.2949112 0.2217993  
0.3369888 0.643191 0.1287958 0.5115894 0.091381946 0.3049152  
0.2748478 0.8643428 0.2726847 0.2399888 0.1028565 0.2061598  
0.2755517 0.2262206 0.5607662 0.545017832 0.8079806 0.2424794  
0.2815582 0.09064328 0.409961609 0.2582473 0.5073917 0.4874744  
0.3184025 1.202808 0.7409518 0.2452067 0.25953792 0.08883582  
0.2981967 0.257102046 0.2338479 0.1405261 0.2472959 0.07415129  
0.2785728 0.309453871 0.296963854 0.4784281 0.2995742 2.986281  
0.093444863 0.323279969 1.052114371 0.1031467 0.7267128 0.721873 0.63405  
0.4514411 0.2745358 0.2431863 0.396376039 0.75995838 0.7444533  
0.724861301 0.9393517 0.530139406 0.3781261 0.9851678 0.350393  
0.9533108 0.9944456 1.4608 0.6880623 0.1117815 0.1634371  
0.276188868 1.007369 0.2810542 0.2098817 0.1299394 0.956143441  
0.2863014 0.2927558 1.298684 0.806030812 0.2199662 0.2331557  
0.4903816 0.0766213 0.332758 0.1832106 0.5293309 0.278674724  
0.861432111 1.512809127 0.3003767 0.315099488 0.120489329 0.5095355  
0.5917989 0.723292967 0.2681376 0.3317535 0.112193 0.713167986  
0.2474339 0.2349702 0.7346521 0.704976385 0.2495557 0.564177  
0.1508915 1.841939 0.1951674 0.2939119 1.03472 0.1579472 1.358545  
0.232956 0.3854347 0.178614871 1.035786 0.3207944 0.5614679 0.4564649  
0.4837986 1.112631 0.265274 0.329401828 0.160567072 0.334650642 0.1478345  
0.3784703 1.406051 0.2832767 0.3791708 0.713291014 1.186032 0.3804619  
0.2419303 0.07993375 0.4285024 0.794751253 0.5825335 0.3757688  
0.8190712 0.5192919 3.784071 0.470216 0.2868393 0.217667229 0.409539  
0.4087583 0.550512262 0.1663677 0.2629731 0.6310608 0.5006598  
0.5242729 0.309389138 0.716062227 0.137422741 7.765583 0.3110718  
0.1364689 0.2162735 0.6476281 0.234754 0.622818374 0.2249455  
0.175753535 0.1729682 0.4642268 11.03022 0.4737566 0.06308257  
0.51668198 0.3763512 0.3660986 0.2671719 0.09813742 0.1574079  
0.3583908 0.6415752 0.600211623 0.9681892 0.150512291 0.2212834  
0.09517998 1.559418012 0.5549837 0.7820712 0.5697258 0.32260286  
0.3467426 0.9302065 0.3112371 0.412241766 0.1972354 0.1987388  
4.851372 0.3936604 0.5864172 0.7020439 0.1666016  
KLF3-AS1 0.510585 1.701581685 0.2536107 1.835389613 0.614656257 0.624620538  
0.7406829 0.507641164 0.3569513 0.3717452 0.059077946 0.225942  
0.8743157 1.76385 0.7398131 0.9784636 0.4598473 0.430052635  
0.4954545 0.3064408 0.410262066 0.4079841 0.577704656 1.177139  
0.09470511 0.308521849 1.19098 0.06844843 0.4253049 0.5512745  
0.7717838 0.791972403 0.3314884 0.804487597 0.7199188 1.381423761  
0.553840573 0.878694905 0.7754525 0.5109045 0.583608526 1.251313  
0.349570967 3.947652 0.552591873 2.698863 1.799197 0.1382307 0.362908626  
0.2845241 0.7770304 1.528284 0.743547443 0.5607606 0.240460559

1.147292 0.3713084 1.82701 0.3643627 0.3110471 0.08660895 0.8567519  
1.392635027 0.5227021 0.3344326 1.110105 0.3325813 0.9810859  
1.435788 0.3119308 0.7371259 1.268015815 0.1980846 0.3367883  
0.31248534 0.6254196 0.082939306 0.8581529 0.844282 0.6871989  
0.2555509 0.4268596 0.3872377 0.215175389 3.096297171 0.08894356  
0.2606343 2.217998 0.386432631 0.6878598 0.1219289 0.2463385  
2.038390053 0.7423663 0.6697948 0.148844061 0.7330657 0.476315094  
0.325406592 0.3137708 0.234059241 0.6016372 0.2966476 0.170410741  
0.5759982 0.3760545 0.222635659 0.9334944 1.391202119 0.319559716  
0.158793 0.346568972 0.3287548 0.3455448 1.152069 0.3073273 0.2488857  
1.038301116 1.672989 1.961893 0.5049231 0.5843183 0.5397124 0.300378  
0.3809589 0.7841268 0.1566307 1.010364 1.256187 0.866207402 0.853557199  
0.3386127 0.512733563 0.850789466 0.3497753 0.991853911 0.5655364  
0.2022928 0.119615401 0.653589278 0.209815351 0.761820641 1.577371  
0.6830761 1.385641 0.7089045 1.59149 2.272377 0.781555947 0.3328944  
1.052113 0.660463737 0.9593986 0.5598565 0.365962286 1.709362 0.633291  
0.175700022 0.9585533 1.069693 0.304897091 0.6313997 0.9890548  
0.5686935 0.332190532 1.042205 0.5699141 0.292757066 0.6390773  
0.72077605 0.8120486 0.4685815 0.233393176 0.3242442 3.210986478  
0.8200828 1.512778 0.3928497 0.7278333 0.1941617 1.091112945  
0.540557 0.1440625 2.255387 1.888909 1.061819 0.2104605 2.121298 2.422518  
0.702846043 0.163850309 0.7199341 0.7908655 1.349269 1.13547 1.276607055  
0.3620009 1.135855397 0.7920401 0.1482064 0.227892684 1.223056257  
0.2995838 0.2687979 0.657317002 0.06036668 0.3867015 0.6434299  
0.7606067 0.4867318 2.970302 0.09389668 0.5261439 0.09259871  
1.231195 0.737519 0.1823022 0.4488163 0.933942563 2.006475 1.052243  
0.29582064 0.138013 0.8537508 1.20031 0.5603065 0.4020673 0.703828759  
0.8827535 0.2431978 1.545124 0.1258075 0.7863264 0.278383087  
0.2083316 0.5590538 0.1705779 1.017920325 0.237324621 1.708501  
0.5137991 0.6143657 1.192915923 1.087762 0.6068446 0.349934243  
1.070255 1.389881 0.2221209 0.4980464 0.3015922 0.2107076 1.772632383  
0.5805582 0.08037141 0.8555041 1.279024 0.9626502 0.4437479  
0.7078737 0.3446673 0.4567056 0.280656285 0.5527971 1.670425  
0.147009476 0.6065003 0.237245 0.5383983 0.4113421 0.2924258  
0.9678164 0.4609211 0.6508723 1.287604502 0.3508891 0.552102454  
0.9323775 1.042939 0.5091661 0.709563381 0.629601968 1.367363 0.4329622  
1.060631 0.04816462 0.3794053 0.289418344 0.2769435 2.106606 0.1865785  
0.647460939 0.4028233 0.3831673 0.317968646 0.2702419 0.602053231  
0.03990268 1.150258 1.181163823 0.884274 0.8822545 2.34718274 0.767302956  
0.1892106 0.4169589 1.374561 0.4294356 0.349198 0.9672323 1.230514  
0.2856099 0.1899412 0.931652359 0.1855726 0.151823212 0.341962  
0.398047451 1.724807 0.2959412 0.41079052 0.4018714 0.167988 0.1888901  
0.122086403 0.326372 0.1929259 0.13920108 0.928130953 0.2647851  
0.4272274 0.3093602 0.604494613 1.329395231 1.487856707 0.1579466

0.3097755 0.1229276 0.1357038 0.2034244 0.3361363 0.2106702  
0.1846764 0.5321549 0.2565822 0.3445612 0.370227426 0.4531826  
0.4774177 1.150199 0.5937432 3.98959 1.278331 0.3401909 0.3827049  
0.8489473 0.4714425 1.720967465 0.8181269 0.1830536 0.9653548  
0.4435202 0.667788663 0.3386479 1.52489 1.242118 0.1402158 1.249007  
0.288907 0.4007344 0.550686415 0.07824173 0.6319662 0.452882858  
0.5578095 1.014895 0.733658 0.2363542 0.6780149 0.661907277 0.154992314  
0.431406 2.145968 0.6217109 0.438939349 1.779545794 0.508466651 0.3532899  
1.293432 0.8824574 0.2568808 0.4959369 0.6412853 0.2427432  
0.994765405 0.604745348 0.3232836 0.936346714 2.170628 0.239445032  
1.176716 0.9806614 0.514345 1.331996 1.442831 0.6583647 0.7418369  
0.2250308 0.3751331 0.467198399 1.2303 0.4518536 0.2951151  
0.2288871 1.736572835 0.6379398 0.1809427 1.132256 0.309671751  
0.2407001 0.3452274 0.4223035 0.2474408 1.437899 0.4549508  
0.2354574 1.010400697 1.101449419 0.931247026 0.2612892 0.425534356  
0.392645535 1.627895 1.110014 0.20407243 0.4868231 0.6010772 0.1587004  
0.527459224 0.7453711 0.4230955 0.2636095 0.129355139 0.3620153  
0.1487309 0.4459434 0.2311943 0.7080345 0.9339317 0.4556625  
0.4118785 2.041357 0.3940661 0.8023832 0.28666146 0.8218593  
0.09417939 0.64616 1.243313 0.1810243 0.3037256 0.1696663 0.257035365  
0.461967755 0.451209966 0.1235274 1.023156 0.421512 1.164308 1.15523  
0.507414712 0.7188594 1.020163 0.2107114 0.2405377 0.1352355  
0.368407086 0.1380171 0.8042602 0.430832 0.7758247 0.8039239 1.4006  
2.344606 1.09913388 0.202498 0.6266876 0.425131843 0.281426 0.9216239  
0.7201966 1.183751 0.3847924 1.278900676 1.008290949 0.136163744  
0.9183656 1.458591 0.4647516 0.3423153 0.3569822 0.2699348  
1.257547324 0.6127035 0.248608718 0.1679656 1.118368 0.5864244  
0.5432239 0.1772618 0.653102901 0.3376079 0.4908248 0.4991432  
0.5442146 0.06754076 0.6982583 1.558208 0.76168711 0.7024389  
0.371696252 0.1237424 0.05122903 0.48099731 3.165557 1.614866 0.2902472  
0.587203997 0.4446935 2.243253 1.293287 0.327483935 0.6003804 0.5095558  
0.1488887 0.1155715 0.4421418 1.105485 0.2499906  
GABPB1-AS1 0.1895658 2.305178516 0.2443367 0.733886631 0.997614145  
0.435877183 1.239478 1.381899653 0.2880688 0.3586647 0.65148862  
0.4630655 0.5543327 3.159883 1.000617 0.945611 1.245693 0.587948113  
1.151979 0.4369443 0.369307925 0.6049905 0.857990609 2.89173 0.8799598  
0.423761606 0.7931136 0.3108771 0.2964733 1.449469 0.2794151  
0.712722562 2.161179 1.305935208 0.5195511 1.039764445 1.687821283  
1.922669677 1.067271 2.047413 1.055447433 2.270338 0.21469894 1.116906  
0.670129411 1.511844 0.8524894 0.5011481 0.298386262 0.2141431  
1.038722 6.643843 0.690977615 0.9811638 0.961767282 3.141974 0.2544654  
2.107393 0.2084684 0.6454874 0.1575636 2.275095 1.109880636 0.6977683  
0.1589076 1.675012 0.2880036 0.5385803 4.092913 0.4168674 1.083612  
2.766531646 0.2849621 0.3063515 1.800652497 0.4264449 0.208413432

0.9542597 0.4250487 0.6404008 0.4196693 0.5020125 2.273771  
0.466553264 1.089907445 0.4203579 0.3374065 0.817887 1.359497012  
0.8601299 0.3165032 0.2746783 1.687704527 2.048337 3.499931 0.140425247  
0.9885932 1.738219552 0.511774509 0.2105492 0.202484452 0.1773774  
1.323049 0.260642431 1.538487 0.383142 0.564564382 0.837907 3.476060597  
1.39012538 0.1925897 1.253607851 0.670644 1.091762 1.543882 0.5569767  
0.5782227 2.004729816 1.219014 3.571629 0.4097562 0.3432699 0.2742753  
1.898266 0.7959182 1.925189 1.001861 0.8351693 1.589338 2.714623086  
1.665320936 0.7840808 1.663067722 0.68662662 0.4564071 4.311028683  
1.481537 0.3123014 0.112452768 0.786604335 0.169059866 1.097389021  
0.7046089 0.961205 3.269326 0.7773232 2.259416 0.75515 1.735403285  
0.4207431 0.9438164 0.548949867 1.767138 0.5340618 0.411571766  
1.359504 0.8257724 0.577757394 0.8800758 1.514175 0.394825056 2.38221  
1.780197 0.93109 1.733869468 1.463196 2.315197 0.220091828 0.3057971  
1.590577813 1.064761 0.5126081 0.532138632 0.429157 4.633635405 1.42815  
5.655997 0.2496407 0.5828229 0.2851854 0.518764497 1.340114 0.2271412  
1.566344 1.011702 0.5500839 0.1143469 1.527359 1.10791 1.895559879  
0.08868032 2.807687 1.005263 0.7752075 0.5772823 1.612289897 1.066646  
1.055195777 0.9379308 1.146678 0.234731444 0.712751019 0.5232799  
0.2340709 0.648454124 0.7286872 0.5354653 3.023558 2.089967 0.4861711  
1.841575 1.173138 0.316991 0.2195367 1.219906 11.16302 0.2864821 0.4686981  
0.622751554 1.38205 0.6135522 0.475429769 0.2619226 0.8414105  
1.544689 1.182682 0.5355566 1.31792437 5.670005 0.6507863 0.7745616  
0.05305752 0.9686127 0.409180622 0.3636465 0.3979112 0.5386847  
0.795189195 0.174066606 2.657063 0.5945937 0.4411044 0.779797868  
3.302988 2.246226 0.528712723 1.760958 1.471218 0.1599121 2.181987 0.5596458  
0.4715176 1.556537885 1.288696 0.329650392 0.4730651 1.91185 2.425444  
0.2597628 1.854902 0.366806 0.9921186 0.935395018 2.433209 1.300097  
0.154778057 0.5020924 0.1740082 1.005127 1.153583 0.3168119 1.751699  
0.7557677 4.793661 1.628489508 0.178008 0.702836055 2.180019 1.03136  
0.7471267 2.896106819 0.436480627 9.886564 0.9641052 0.9025906  
0.1760438 0.6065871 0.378888649 0.3296972 7.361286 0.6635462  
1.028728193 0.2707942 0.1816024 0.260355515 0.206097 1.391361395  
0.1234082 3.208724 0.531571273 1.57865 0.7038108 6.8012925 1.037031217  
0.1241285 0.3891072 1.793974 1.354001 1.716044 3.301532 1.017706 1.463363  
0.4539283 1.4088167 0.1980523 0.2152474 0.3005915 0.457303422  
1.922699 0.3248997 0.529926143 1.203285 0.2223795 0.2933 0.433211159  
0.8085839 0.3496705 0.244391255 2.406027816 0.236206 0.6130701  
2.691056 1.335384515 1.177915409 1.46173542 0.2128513 0.2979587  
0.281004 0.1703779 0.623741 0.332207 0.1916945 0.3764424 3.40263  
0.3925931 0.7667269 0.580803837 0.4262916 0.54448 1.689613 0.3141758  
13.15586 2.065911 0.4236639 0.6438519 1.885145 1.177166 1.511570267 1.69046  
0.2830677 1.482415 0.2799491 1.959405393 0.348168 7.817503 1.374146  
0.1971134 4.166207 0.1414328 0.3703922 0.724485045 0.3879021



0.5068933 0.474741347 0.3402052 2.169087 0.983021 0.9644385 0.5518592  
0.229158449 1.107587403 1.893674 3.108265 1.344467 0.253249595 1.410936693  
0.507705121 0.457864 0.7413746 0.5382213 0.6594357 2.541105 0.5123335  
0.3171571 2.934059025 1.292546943 0.1779465 0.822091197 16.46276  
0.838155179 0.9134574 2.486563 0.816437 3.740632 1.383535 0.8766369  
2.787825 0.175308 0.7812241 1.973599861 1.42687 1.066047 0.2644218  
1.095197 3.485971251 1.468824 0.4642193 0.7627213 0.698995752 0.8962754  
0.5991141 0.5289046 0.4996374 1.696928 0.4549407 0.5441686  
4.784529821 2.173376792 2.133553 0.4233326 0.588847005 0.157139013  
2.608858 1.990582 1.325085589 1.695488 0.2589726 0.4091549 2.103354895  
0.3836132 0.3814361 0.2723993 0.278830013 0.4531777 0.8648466  
0.2349841 0.4814552 0.3958367 1.701072 0.3174619 0.1480126  
0.8971034 1.493437 1.99204 0.368583572 0.9851356 2.373862 1.097451  
0.735764 0.4157836 0.2416829 0.2400786 0.135948481 0.189968695  
0.485959256 0.229973 1.269123 0.4119284 0.7131635 2.277086 1.718753249  
0.7179205 3.103794 0.06656522 0.4602065 0.2360929 0.292787023  
1.258616 0.9725314 1.285262 1.548809 1.31346 2.108833 2.725287 0.441983958  
0.8015208 2.661711 0.274620094 0.166097 1.660547 0.7578644 1.752656  
2.162842 1.001081602 3.01219987 0.974100368 0.2029472 1.098229 0.3522036  
0.3547073 1.032046 0.302769 1.837087464 0.4115817 0.269041889 0.1998815  
0.7438297 1.40752 0.9444256 0.3882936 0.938262475 0.6748013  
0.9508832 1.326192 1.043167 0.3028337 0.8377232 3.23521 1.482296138  
1.314495 0.898889912 0.5270848 0.1139179 0.694102175 2.114887 0.7230073  
0.2946083 0.650496007 0.2011005 1.100172 1.840811 0.708573133 0.3178948  
0.2307556 0.1642852 0.3602167 1.584145 1.992201 0.8159364  
MMP25-AS1 0.2491347 1.363621737 0.8570929 2.455951486 1.373932175  
0.91849266 1.925339 1.627736572 0.648402 0.5742255 0.543443515 2.736532  
0.9900099 2.4821 1.503809 2.463154 1.134116 1.275189095 0.6855104  
0.818752 1.347295369 1.21866 5.717429274 2.820186 1.43681 1.579640413  
1.134239 0.7974372 0.06619807 4.081362 0.4148221 1.270983292 1.737742  
2.189627506 1.338154 4.01592702 2.95237874 3.31783412 2.572256 3.006907  
2.139596682 2.824892 0.583258825 0.3948218 1.744985978 1.441956 2.80803  
2.768928 0.464270547 0.5358575 2.215675 4.922741 2.720870542 1.202264  
1.053045981 3.360706 0.6634009 1.586004 0.4138923 0.8639916 0.3837993  
2.444565 2.493810459 0.8437013 0.3516677 2.474656 0.8059243 2.090304  
5.941496 0.4386981 0.913114 3.638254914 0.5906816 0.5472299 1.823644858  
0.7662243 1.511187343 2.282554 0.5883855 0.7349648 1.221458 0.6250024  
3.104058 0.58669653 3.188325753 0.7644378 1.35752 1.827672 1.342569457  
0.6852037 0.5117823 1.082968 2.107034904 2.217899 1.404847 0.781276151  
0.1103691 1.884144863 1.042702114 0.4760344 0.712085347 0.3934345  
1.463692 0.583045609 2.629144 1.124888 1.222958835 2.020798 2.750988424  
1.163282168 0.674356 6.344044327 1.461904 2.440428 2.146088 0.6583243  
0.9508392 2.57774526 1.371978 3.00222 0.4480069 0.489904 1.300025 1.37969  
2.858245 0.07054695 2.168527 1.932315 3.055872 5.507169244 1.990071678

0.5163969 1.408247096 1.305543524 0.5724166 1.970603719 1.373357  
0.3983052 0.868256229 6.383447562 0.877453109 2.490500529 0.4367028  
0.8977823 3.688145 1.446373 3.788757 1.850914 2.147664134 1.08643 2.383985  
2.916767832 2.324706 1.192481 0.738464921 2.15678 1.021813 2.182048694  
1.508657 1.06835 1.205508568 1.944372 1.704794 0.8564771 1.891859691  
2.501809 2.37948 0.444486561 0.5317812 1.437051761 5.071468 0.8123025  
0.612408241 1.123392 2.380304904 1.907224 6.116868 0.5163065 1.024216  
0.8695259 2.315510161 1.331263 0.5031826 2.664805 4.827091 0.4590528  
1.026635 1.59093 2.467746 2.177418074 0.167151274 4.373824 1.587618 2.656888  
1.574385 1.969380633 1.098413 2.032327241 2.533549 1.098405 0.551977213  
1.369848298 1.184275 0.8583809 2.105490331 0.8526854 1.02922 1.528399  
2.808672 1.383068 3.169681 2.224316 0.4089476 0.4929422 3.237079 5.469032  
0.7561618 0.5190297 2.042685373 4.155153 2.408025 0.985020966 1.009922  
0.7073802 1.691026 1.404377 0.7764764 3.76954331 3.875181 0.7431692  
2.491625 0.06346583 1.662184 0.835106323 0.9366247 1.470255 0.5975769  
2.79071091 0.70445505 3.570116 0.6638196 3.963107 1.450977263 5.283318  
1.728379 0.828942223 1.141498 1.878562 0.4384021 2.673743 0.6337437  
0.7491281 5.546415912 0.9195971 0.597307013 1.078261 4.589245 3.944963  
1.237525 1.688684 2.069597 0.906117 2.21385884 2.248115 2.938515 0.28226978  
1.944614 0.3804399 1.05624 1.155168 1.548189 0.04746703 0.7081979  
3.689616 2.631091397 0.5207754 0.589701633 2.220218 3.861642 0.8457773  
2.964295651 1.29607779 0.3210574 2.038545 2.396708 0.2796913 0.5878905  
0.833936564 0.6558916 1.091437 0.4829071 2.701886193 0.6108226  
0.4610458 0.634740951 0.2809879 0.722988523 0.4495616 1.878537  
1.384117492 2.171515 2.031112 5.22498078 2.038770769 1.009656 0.4826769  
2.543498 1.698705 1.545784 6.074651 2.022161 2.999474 0.3997307 1.987219574  
0.3714897 0.69963008 0.3485428 1.152496727 1.521641 0.4340551  
1.51935272 1.700786 0.3707575 0.4345756 0.948135197 1.259474 1.057057  
0.376253772 2.479790988 0.2462628 0.8054881 0.8841187 2.041826647  
2.185986751 4.883747623 0.6069036 0.6269148 0.1006588 0.6389435  
1.156585 0.7713436 2.239318 0.8177668 1.230339 0.6167582 0.6193475  
0.762109095 2.28961 1.75449 2.106672 0.7276835 3.579966 0.4739253  
0.5568433 0.5664557 2.093748 1.247861 3.501789996 4.980302 0.9177465  
2.038642 0.9849608 3.744394093 0.7377438 14.95626 2.864843 0.8068957  
4.423418 0.8721795 0.5216017 1.261084804 0.5935185 0.712753 1.294320868  
1.619596 2.971993 1.625215 0.6027897 1.809408 1.079572762 1.27454738  
2.516716 2.180919 1.453699 0.961583826 1.452317536 2.703558531 1.259445  
1.001913 0.8942377 1.714904 1.355404 0.9817196 0.8487892 5.835503694  
4.971367054 1.104086 1.456195124 1.675429 1.000563178 1.991993 3.89741  
0.7311304 2.753453 2.402253 1.140604 4.659854 0.5297639 0.2088026  
3.039036963 3.745764 0.3360821 0.7634671 0.9912036 4.133013587  
1.019822 0.6105603 1.699054 1.125631636 0.8154263 1.291491 1.077028  
0.6825499 2.5442 1.206456 1.256436 2.141122876 3.285006846 4.111080572  
0.7125173 0.914674172 0.596808799 1.332696 0.1666374 3.211482735

1.968641 0.9630175 0.3971074 4.186513998 1.016163 0.2670554 0.4137234  
0.659805782 0.4903823 0.7984247 1.198153 0.8855982 1.361737 2.704495  
1.009745 0.4387984 4.967912 1.620287 1.957573 0.666623781 0.0623438  
1.947402 1.210735 1.927955 0.7496123 0.6700556 0.6067777 1.529746087  
0.7349024 0.47686181 0.5082557 2.336037 0.9215998 1.04885 2.608974  
3.403512002 0.8079686 4.055342 1.42685 0.6537425 1.066167 0.709256964  
0.5038578 3.700182 0.9061488 1.363843 0.6457637 9.02292 3.926695  
3.567092587 0.5214097 1.618337 0.821624919 0.494615 1.688785 2.19306  
3.423212 1.321063 1.556703384 2.914429492 0.672768601 0.09814533 3.49317  
1.173759 1.635576 2.0736 0.8878636 2.073226578 0.924183 0.438032687  
0.5302944 2.082368 0.2774636 2.036685 0.3903169 1.54413714 1.112707  
1.402896 1.127512 0.967166 1.749037 2.052909 1.775927 2.228057393 2.848415  
0.864842601 1.463845 0.2448597 2.435247486 5.272626 1.15312 0.6678536  
2.501460406 0.6180436 1.953216 2.459977 0.832410424 0.7150733 0.3876531  
0.3791694 0.7955002 2.444079 2.259433 1.403075  
PSPC1-AS2 0.1681755 0.876385438 0.3909382 0.889696089 1.136504769  
0.722857293 0.5489206 0.906898043 0.1698261 0.1508004 0.674577964  
1.183871 0.7914629 1.306324 0.7117121 1.383753 0.3281711 0.337364663  
0.2512296 0.2343131 0.575727586 0.8875649 2.00804788 0.8782528  
0.8110384 0.779644505 0.2154793 0.1352725 0.4063655 1.758173  
0.6790505 0.375251138 0.8027783 1.686113213 0.5966383 0.748889155  
1.226636998 1.282669364 0.7829815 1.137578 0.898064483 0.7522337  
0.348776651 0.8167663 1.026282523 0.843013 1.609473 0.4672831 0.39175055  
0.281148 1.206559 1.733416 0.854600791 0.5788437 0.348746203 1.237527  
0.5536298 2.278156 0.5236935 0.3805363 0.5890005 0.930622 0.941549157  
0.5458941 0.08592073 0.1584459 0.2392463 0.3168296 1.260394  
0.5203875 0.2029057 1.421551192 0.1696363 0.1526928 0.389719116  
0.7924675 0.16647143 0.7844519 0.430685 0.4983312 0.4476466  
0.06686987 1.397753 0.421640559 1.008538648 0.1088139 0.331125 1.188811  
0.975831991 0.6052104 0.1821242 0.3595911 0.632042991 0.3739705  
0.7533468 0.297424215 1.587712 1.248698384 0.174170417 0.2149664  
0.323794719 0.3756899 0.6264098 1.05074538 1.027656 0.5261158  
0.43998782 0.9303697 1.475589403 1.140272924 0.5999452 2.054739936  
0.3284634 2.417157 3.181133 0.0533493 0.7992804 0.590165975 2.258791  
0.7367203 0.5159408 0.7110951 0.2224494 1.415992 0.7957237  
0.9623592 0.6826555 1.260805 2.904599 1.700954772 0.728859221 0.5334577  
2.694454541 1.5044001 0.3456249 1.042453809 0.5890327 0.2362365  
0.384137226 2.597274549 0.427293262 0.999436948 0.5207652 0.648371  
0.457377 1.214188 2.159241 0.738997 0.88689648 0.7193735 0.8024637  
0.681209006 0.8416519 0.5458042 0.474056278 1.503975 0.6225837  
0.441586492 0.4174011 0.5948485 0.301279245 1.515654 1.664429 0.2582679  
1.182995774 0.7901057 1.36095 0.367892856 0.3717475 1.184278561  
1.538266 0.1094414 0.608990921 0.3929395 1.804910456 1.276918 3.727326  
0.1230841 0.1577985 0.6020365 0.41908779 0.2620323 0.3991468

1.544556 0.9797994 0.1894424 0.3288068 1.055798 1.531183 0.898579133  
0.210477924 4.027394 0.5197759 0.6459268 0.658013 0.95496 0.9920366  
1.564451888 1.164014 1.551262 0.337782834 0.952185964 0.4810472 0.1918283  
0.839434786 0.5169699 0.2483734 0.4914525 1.039421 1.61247 0.3849794  
1.16848 0.2574747 0.3214863 1.678184 2.298421 0.376362 0.2600923  
0.567434554 0.8123819 0.5992692 0.462166591 0.7534738 0.3500127  
1.345272 0.8594094 0.2930414 1.491798748 0.9489227 0.2940288  
0.6543386 0.05771752 0.3787856 0.633728264 0.5575363 1.617446  
0.6651858 1.034489288 0 1.316818 0.401113 1.649737 0.861969002 1.127655  
1.044023 0.672174347 0.5809105 1.213873 0.1729278 2.145137 0.3443712  
0.7181029 1.740442013 0.7365632 0.242924849 0.2529573 2.434077  
1.732429 0.2923217 1.818633 0.2623709 0.3320787 0.938864318 1.823253  
2.27368 0.321437649 0.3934822 0.2650077 0.6916127 0.8046694  
0.7011997 0.7215187 0.3482868 1.831444 0.873411943 0.3919506  
0.394009287 0.9636734 0.5774712 0.7161261 1.276962467 0.66474297  
6.638661 0.8898755 1.412583 0.4949683 0.4130291 0.522814802 0.2243497  
10.0303 0.04204806 1.225001864 0.1945325 0.2812611 0.680757341  
0.2603594 0.410126929 0.07322567 0.9422326 1.018317375 0.8737814  
0.4096343 0 1.210456931 0.7291652 0.4178555 0.6103745 1.63241  
1.22686 1.163528 0.6251303 0.858672 1.497233 0.970359594 0.2432467  
0.207476832 0.2524573 0.440794477 0.8715779 0.1810279 0.504410528  
0.573593 0.449569 0.5514624 0.594868907 0.4932343 0.3097846 0.158945914  
0.780642059 0.3359369 0.8196444 0.3759154 1.012850017 1.027458671  
1.965870244 0.2098905 0.2094367 1.029846 0.1202219 0.4437404  
0.2944037 0.2952235 0.7201642 0.7350458 0.03469462 0.2269818  
0.896029142 0.4671548 0.3023204 0.6092852 0.5570335 8.937507  
0.5172004 0.2680985 0.8393392 0.4822098 0.2403187 1.461627019  
2.736188 0.6531834 0.5688395 0.6267083 2.892663226 1.298562 3.021339  
1.422159 0.2801829 1.512041 0.1746459 0.3390722 0.667356329 0.2680196  
0.2108591 0.215467317 0.4960716 0.6359552 0.9817066 0.5193408  
0.3727847 0.200063339 1.493243774 0.4295916 1.355732 0.9204595  
0.293672021 1.117580001 0.915649455 0.6483245 0.3854018 0.5355507  
1.673825 1.372991 0.2250761 0.3209929 1.494843678 1.282163823 0.3509424  
0.874768787 9.142078 0.230688731 1.140815 1.277148 0.3775511 2.130488  
1.304462 0.3573458 1.029001 0.1204454 1.176699 0.644790476 3.267199  
1.716082 0.3749314 0.6533833 0.916749504 0.2768517 1.045955 0.7717581  
0.938199116 0.3016558 0.2293812 0.246582 0.6742403 0.8235428  
0.2303126 0.9678803 1.47134325 2.393778033 1.472315265 0.2517341  
0.617930208 0.090879717 0.6782115 1.983855 1.275306002 0.7184993  
0.4289603 0.5385048 1.603387803 0.1217141 0.2363033 0.439774  
0.387721387 0.2214455 0.6947486 0.455243 0.5537033 0.3680151  
0.7824162 0.2945069 0.3153508 0.9781133 0.5856944 0.5616108  
0.179628289 0.4222958 0.8468631 0.3387921 0.7172731 0.5008537  
0.4048811 0.2143761 0.098073584 0.363325704 0.560915614 0.2573191

0.7136582 0.5227924 0.9156985 0.9533053 1.189815525 0.4328571  
1.195689 0.1520643 0.3768153 0.3232002 0.283947802 0.5010462  
1.691411 0.4826475 0.6963176 1.463669 2.91858 1.537224 0.54725555  
0.365799 0.570941 0.631866872 0.1792625 0.5578561 1.139673 1.517244  
0.4942945 0.933433611 1.850321157 0.647823958 0.09180615 1.843502  
0.4460405 0.3900826 0.7975134 0.258219 0.623156421 0.2356477  
0.361535561 0.3010665 0.5149199 0.9970225 0.4382392 0.3058738  
1.299033773 0.867365 0.5062417 0.7327847 0.4523486 0.1369913  
2.150258 0.5132395 0.803200146 1.133165 0.534233863 0.1589564 0.2393  
0.967758943 1.544831 0.6390382 0.3159697 0.590931956 0.1376487  
1.252881 1.083472 0.274354892 0.391489 0.4496994 0.1443461 0.2969205  
0.7036723 1.08311 0.4188672  
AC010976.2 0.129882 3.52635621 0.1725267 1.791400986 1.135100637 0.462560794  
0.4239316 0.85762994 0 0.5324031 0.037212634 0.4044848 0.3991818  
2.00781 1.090073 4.257731 0.1241372 0.18610492 0.2586996 0.1034058  
0.11726629 1.044521 0.809121559 1.078499 0.4090549 2.265117409 0.7290551  
0.08954656 0.2391133 1.379391 0.4195448 0.938421468 0.8009758  
0.50407201 1.843136 3.146893681 1.154843221 1.520277197 0.7294757 2.47153  
1.447462167 2.760607 0.230880318 0.2194049 1.019055181 0.9533369  
0.9943974 0.04124377 0.311193395 0.1737046 2.113753 0.2846444  
2.640034369 0.596055 0.395760279 2.929289 0.2443249 2.029736 0 1.203543  
0.05776322 5.339061 1.068478319 0.5781865 0.1706313 0.9323262  
0.0452498 1.025358 1.687231 0 0.5671198 7.436726041 0.4866093  
0.02246185 0.343977436 1.12154 0.132239277 0.3644106 0.138231 2.199208  
0.4609569 0.2360852 1.578407 0.661603965 3.087761811 0.07203176  
0.2922606 0.2448319 0.674059085 0.6410115 0.257197 0.3173856  
1.972431949 0.8251931 0.8574043 0.187510907 0.4349051 7.549642156  
0.326671744 0.474339 0.204136174 0.1421121 0.02303698 1.893479351  
2.666696 0.06332252 0.097086514 1.70317 0.699436048 0.788376491 0.2118117  
1.435745511 0.414159 0.6982212 0.1831148 0.7063146 0.1485196  
0.651122085 0.5981025 2.61455 0.1301098 0.1743426 0.916255 1.421643  
2.001637 0.1698812 0.158561 2.814789 1.424269 3.471784446 4.265440676  
0.3259698 9.142873188 0.527225553 0.3220063 1.916875157 0.1516367  
0.04170185 0.042381337 2.159149298 0.029010882 1.43346473 0.7521423  
0.3052113 0.3195913 0.3482951 9.853436 2.975937 1.769129466 0.7584006  
1.6775 0.628584666 0.07959284 1.785282 0.366113886 0.6139464 1.172289  
0.129919031 1.749949 1.20757 0.14957878 0.361557 2.301549 0.1628248  
0.298327573 0.5423991 0.8698445 0.198435688 0.01367147 1.449136421  
0.4242871 0.2173414 0.97165832 0.2601149 3.959238815 1.098869  
3.768951 0.4164441 1.549463 0.2467098 0.452098878 0.2120043 0.1281086  
13.69467 1.755034 0.02786789 0.06449209 4.992204 3.319044 2.454870783  
0.116108714 2.435624 0.6673008 2.114172 0.5807814 1.758412667 0.6840628  
1.141298906 0.5707737 0.4667691 0.111801361 7.374747346 0.1486052  
0.1904774 1.481819153 1.026659 0.7307387 0.09858415 0.8409715

0.3630644 2.944882 0.2162475 0.08522049 0.09931362 1.346559 0.5442729  
0.1107293 0.3252172 1.001668508 1.971838 1.674953 0.045324632 0.05867982  
0.3089314 3.310952 0.4266786 0.1939851 1.476305604 1.989174 0.1784189  
0.9384997 0.05094316 0.4457696 0.479440296 0.09841955 0.1713126  
0.06907204 3.506190171 0.058495505 1.106916 0.6597906 0.1967711  
3.19112885 1.190034 2.549442 1.501741631 0.7263655 1.33925 0.5723666  
0.4650359 0.05699101 0.6338185 2.624281502 1.584648 0.214412543  
0.4217274 3.832918 1.502729 0.4386197 5.874953 0.2460497 0.5373542  
0.298320831 0.6352327 1.160191 0.141855113 0.8161523 0.438569 1.302267  
0.5918539 0.4420709 0.04898719 0.7904778 9.347503 1.373163496  
0.345947 1.738820328 0.5164152 2.242649 2.486157 1.088219269 2.762480369  
1.220724 0.6136172 1.588648 0.8191377 0.8020134 0.102544792 0.2263058  
2.443807 0.2041206 0.711330462 0.9443504 0.1861869 0.474360193  
0.1149004 0.310277113 0.29084 1.719987 0.606687676 0.2103341 1.973489  
9.23288182 2.340270857 0.03575458 0.3855756 3.309368 1.490496 0.439913  
1.48543 1.326847 1.498553 0.881001 3.956064736 0.08587865 0.274687637  
1.047283 0.097264509 0.7490358 0.3794786 1.832199745 0.07788767  
0.1388809 0.4867367 1.050097226 0.435343 0.1171821 0.33318944  
0.908250214 0.1111904 0.141543 0.1184978 0.425700432 3.002035633  
1.807431563 0.4013869 0.1386412 0.03029906 0.03979174 0.2393467  
0.2598493 0.1954297 0.3552094 2.238266 0.3215361 0.6511074  
0.456266193 1.918895 0.3049564 4.503847 0.5862028 3.295198 0.7988682  
0.2366315 1.128876 0.5402004 0.3605908 1.673065434 3.046242 0.3747371  
3.213275 0.7165819 2.090940797 0.4871133 4.40009 1.821627 0.07065646  
6.357748 0.05780533 0.3536886 0.235611248 0.1182809 0.09305521  
0.380355452 0.3648727 0.7484168 1.104766 0.3349739 1.091783 0.161866582  
0.384410956 0.113751 1.271397 0.03584225 0.155522085 2.779878892 0.107757182  
0.1525947 0.5102503 3.17098 0.7386832 1.91471 0.317854 0.2428437  
1.936527763 1.331382484 0.4130027 0.579072295 1.815539 0.135741726  
0.7342097 0.742959 0.3665614 3.085082 1.547135 0.3548293 0.09872028  
0.6112744 0.3709247 0.590999721 3.017852 0.2004702 0.4780033  
0.2162607 2.211676111 0.2565753 0.4359508 2.397216 3.246080848  
0.549141 0.185587 0.2992556 0.3188058 2.422943 0.2413957 1.84204  
1.391411122 4.527467507 3.086332235 0.1481252 0.58735728 0.320852334  
1.646175 0.08207852 0.609712025 1.12741 0.4574905 0.016975 0.661946865  
0.08952371 0.2346392 0.2523023 0.342214182 0.02443179 0.344928  
0.4520371 0.1555001 0.1160074 0.2014201 0.4873881 0.04638963  
8.612558 0.4246382 2.259782 0.138727012 0.2950784 0.373733 0.635434  
0.8441148 0.110517 0.2436544 0.4257328 0.0865626 0.106893947  
0.30942528 0.4353081 1.915932 0.2636753 1.919528 1.87916 2.739562997  
1.018806 3.229371 0.1207948 0.1995529 0.1248038 0.083540198 0.2721465  
5.870683 0.3691989 0.9410912 0.8074233 0.9293251 1.608058 1.690582874  
0.3049279 3.603094 0.199180033 0.5274077 1.012114 4.304696 0.9076557  
0.2363176 1.318201081 1.721425546 0.285894141 0.04051539 2.100475

0.6965255 0.04694977 0.30796 0.03255881 0.76156061 0.6031696  
0.265918174 0.04428834 1.749761 0.1222224 0.3570486 0.01499851  
1.576526903 3.236238 0.4671338 1.819061 1.016288 0.241825 0.4880264  
2.022322 0.998943758 6.890021 0.294706473 0 0.02640165 0.62420277  
6.927525 1.62702 0.3346608 1.104509108 0.4100379 3.339604 2.988449  
0.82735818 0.2418777 0.1984589 0.09555304 0.03743867 0.8207151  
0.4071785 0.0924261  
AC124312.3 0.268591 0.282285201 0.4360627 0.558219512 0.218357585 1.022527259  
0.4035484 0.407258575 0.1033246 0.1223321 0.051302855 0.1045574  
1.238239 2.370656 0.369337 0.2689388 0.1854023 0.33354338 0.4458173  
0.727053 0.538893633 0.2314316 1.221724924 1.277773 0.2114774 0.197644508  
0.7429037 0.1851788 0.04120643 0.1485691 0.9502312 0.304410847  
0.5839825 0.215098689 0.4407896 1.228233008 0.44778205 0.423642623  
0.8204272 0.3061293 0.831470986 0.6865046 0.251988309 0.8102156  
0.195126531 0.0801408 0.1958453 0 0.440941234 0.2736871 0.6562299  
0.981056 0.474073235 0.1173922 0.318273234 0.5475847 0.4275229  
0.3661297 0.5874604 0.09646821 0.4977171 0.1969404 0.143212979  
0.4981947 0.1437573 0.5141371 0.6446266 0.5140364 0.8563064  
0.1266445 1.028756 0.991022069 1.083696 0.8515878 0.023711066 0.8728551  
0.060770153 1.067581 1.322085 0.08662623 0.2042659 0.2644498 0.9129432  
0.042755353 0.268454058 0.1820609 0.1343075 0.1446579 0.413015707  
0.5768758 1.074827 0.4047437 1.606844386 0.2085682 0.8925703  
0.090478564 7.561343 0.417849233 0.596068659 0.2615772 0.267358931  
0.03265358 0.01587986 0.186459132 1.413044 1.556832 0.167309284 0.6079798  
1.346654407 0.150314295 0.3650152 0.416711012 0.1998418 0.240649  
0.1051873 0.1785216 0.2815384 0.341112114 0.1766933 0.8684478  
0.0560546 0.9133519 0.2819613 0.6999768 0.03630972 19.30241  
0.02185986 0.6881266 0.03272592 0.323401595 0.896536839 0.6616097  
0.091074695 0.699934103 0.619167 0.968983493 0.1941203 0.6036646  
0.131464439 0.900357235 0.079991171 0.430717433 0.6624857 0.4733738  
0.9043926 0.1846823 0.4052943 0.5479698 0.312968259 0.7173041  
1.233424 0.056516899 0.7681095 0.7325185 0.396581061 0.7205936  
0.3409099 0.044777918 0.2751155 0.09047857 0.103107703 1.258604  
0.4556982 0.2581485 0.886836638 0.3338275 0.09993359 0.248701391  
0.1979044 0.589526133 0.2778463 0.4161608 0.142507211 0.2988375  
1.211176348 0.05826714 0.616478 0.5616458 0.1800128 0.09157189  
0.339971972 0.3321338 0.2649236 0.51258 0.7363884 0.3649883  
0.2445064 0.6882457 0.739795 0.54670834 0.304137194 0.4537636  
0.5462311 0.1964955 0.1501292 0.781359974 0.3583692 0.446779603  
0.6295135 0.5362557 0.145570919 0.984849948 0.1317042 0.1312999  
0.390553706 0.09435956 0.05037131 0.2310506 1.222637 1.331424 0.6376178  
0.1949296 0.3916281 0.4498728 0.9436805 0.1023214 0.076328  
0.7384715 0.949396972 0.7975636 0.1417904 0.95291738 0 1.588272  
0.4407213 0.2124187 0.8468801 0.261287885 0.6495053 0.6708425

0.1161151 0.01755808 0.2688683 0.041310996 0 0.09840774 0.2142574  
0.415402689 0.282255011 0.6962558 0.69885 0.1898936 0.801218939  
0.7009961 0.148213 0.779580847 0.8246799 0.6923792 0.3419381  
0.2862131 0.4321357 0.151236 0.867717674 0.3501059 0.369497343  
0.5899607 0.4712041 0.6360553 0.5602359 0.06638893 0.3890985  
0.2525517 0 0.7152022 0.4106789 0.097783621 0.3591003 0.3527003  
0.7293641 0.7669966 0.03047285 6.888645 0.5146206 0.484468 0.199273599  
0.2384684 0.743134668 0.3559755 0.690972 0.4792714 0.468832331  
0.25277443 10.18179 0.3722214 1.316877 0 0.5905381 0.759876818  
0.04874913 13.85794 0.3069917 0.176520453 0.4379185 0.8698765  
0.425081998 0.3432138 0.712934467 0.08910308 0.6384118 0.681514671  
0.2537282 0.9761404 0 0.666320259 1.256964 0.4853467 0.4111491  
0.565086 0.6414713 0.4171595 0.4980619 0.2018473 0.06747689  
0.477927148 0.2219922 0.353449205 0.4761557 0.804556909 1.660615  
0.3579548 0.141641791 0.1879135 0.1914669 0.05032763 0.049353643  
0.2700817 0.2827161 0.132969316 0.302243292 0.9580726 0.5962518  
1.241581 0.352132784 0.614342547 0.348851839 0.6385019 0.1592803 0  
0.2560064 0.2099829 0.1691683 0.4340773 0.1675311 0.6260972  
0.8232394 0.2301649 0.691929897 0.4919256 0.1445212 0.9452793  
0.4171164 26.01839 7.630798 0.546435 0.2431742 0.846298 0.4240186  
0.722535687 0.3215967 0.09935152 0.05768167 0.5632815 0.273093749  
0.03950319 0.5821047 1.276789 0.7671028 0.4471965 0.3187711  
0.5720035 0.39249479 0.1426835 0.4810864 0.458826844 0.301817  
0.7738485 0.6719448 0.4496558 0.6288754 1.308504878 0.075709231  
0.2875066 0.6530038 1.021214 0.732564382 0.710858476 0.111418833  
0.4075982 0.6773981 0.746709 0.2473205 1.136072 0.6162279 0.2092464  
0.660109485 0.045887455 0.8006939 0.465694063 10.32478 0.350885772  
0.173522 0.4238374 0.8269469 0.5468425 1.165679 1.059895 0.6260591  
0.109921 0.6136463 0.55827266 0.5778519 0.1381882 0.1774217  
0.4637823 0.650724027 0.62323 0.1944475 1.020365 0.11416274 0.298239  
0.3140073 0.2812949 0.4395186 0.5010552 0.8495105 0.01840226  
0.367665754 0.403113106 0.354578622 0.4594758 0.520556591 0.207346927  
0.6705295 0.1508757 0.409510342 1.327626 0.02174879 0.1170121  
0.487761985 0.2838684 0.8446506 0.22743 0.202195897 0.6399705  
0.1585106 0.4270052 0.137815 0.3518517 0.2975207 0.6495353  
0.5329553 0.255042 0.4327044 0.512538 1.106545138 0.2997526 0.1288109  
1.12081 0.5382256 0.5550376 0.2799266 0.09782209 0.139228519  
0.405262975 0.31282996 0.5870872 0.5246581 0.2158362 0.1160675  
0.7926729 0.503583101 1.638662 0.3055392 0.1757844 0.2521858  
0.09831981 0.383906414 0.9028062 0.3893811 0.4306861 0.1191514  
2.17682 0.8653756 0.4156752 0.549380815 0.8160436 0.6773689  
0.315787373 0.6543951 0.9239429 0.713787 4.430943 0.2506132 0.070989288  
0.851927803 0.118243596 0.2513528 0.7443431 0.6262555 0.5609661  
0.3639139 0.4937559 0.481212651 0.2724057 0.09165141 0.3816107



0.4229342 1.213205 0.2153558 0.1240653 1.004403945 0.4317686  
0.2800042 0.4876339 0.7380774 0.01389124 0.2803388 0.8921778  
0.310977167 0.03830187 0.497710593 0.2176005 0.03639839 0.520860053  
0.5305871 0.08972306 0.2499126 0.380680324 0.1256211 0.6098164  
1.167333 0.027820237 1.167119 0.3648047 0.1536889 0.1290362 0.09174091  
0.6955894 0.5309266  
AP000692.1 0.3448162 0.975683749 0.38365 0.701605976 0.37736294 0.684046164  
0.3174406 0.49040316 0.1071386 0.03171193 0.372376091 0.9637053  
0.2377677 0.9662144 0.3697644 1.430704 0.6211024 0.186229822  
0.1056625 0.7095441 0.391149976 1.146544 1.266822153 1.903095 0.8405873  
0.532844287 0.6117297 0.2133492 0.05696996 0.8626981 0.4283943  
0.420863319 0.7706859 1.098036056 0.4839463 1.930897161 0.851236682  
1.572161568 0.905596 0.938487 0.714363519 0.9241501 0.247537791 0.5152754  
0.971180105 0.6980318 0.731068 0.2358368 0.17300125 0.1773685  
1.591568 2.975513 0.348857962 0.6492027 0.282875636 1.20657 0.3224029  
0.8406415 0.1238939 0.5201514 0.2890099 0.6381563 1.10313813  
0.2066338 0.2981276 0.6663942 0.2587438 1.066022 1.88185 0.2626385  
0.7253764 1.457328487 0.08026416 0.0321099 0.3687946 0.8447362  
0.042008898 0.5209359 0.148204 0.3143835 0.3294759 0.2953045  
0.8039977 0.059111428 0.835090306 0.240267 0.2088977 0.5249918  
0.133831642 0.3054485 0.2527737 0.1587993 1.224696917 0.3735522  
0.7754336 0.321663005 0.9325649 0.708992505 0.137349154 0.1695205  
0.175091296 0.2708713 0.4939809 0.607645818 1.011379 0.331912 0.242879183  
1.021718 2.172120419 1.174965791 0.1766282 1.026220785 0.7104634  
0.9426767 0.3490242 0.2692528 0.9288705 1.563741792 0.3257164  
0.755262 0.3254929 0.2243052 0.3274535 1.004974 0.8283003 2.873729  
0.9520043 1.193111 1.018018 1.207221256 0.799682134 0.1035519 0.642168286  
1.228227164 0.1695908 0.949946722 0.4954727 0.05961405 0.727024817  
0.952644793 0.082943865 0.972047456 0.5376051 1.281657 1.08205 0.6893978  
1.652036 0.9907023 0.671422301 1.134582 0.9858597 1.211130594 0.7585358  
0.3645877 0.42368117 1.850191 0.6546182 0.495261808 0.1755512  
0.525383 0.38013757 1.938212 2.415098 0.3025919 0.746319481 0.7476839  
1.48032 0.23209348 0.1563502 0.50940597 0.6975109 0.172609 0.472856141  
0.6445263 1.708002512 0.6041794 3.470127 0.2070676 0.3484276  
0.2712916 0.499405137 0.55103 0.1831351 2.421281 0.8362915 0.19919  
0.06914505 1.30043 0.7671029 1.700666548 0.033196183 2.164361 0.5067736  
0.3735394 0.3113417 1.288013627 0.508502 2.840055517 0.7071464  
0.08896807 0.142065264 0.540637131 0.2427835 0.2420384 0.591879403  
0.5870558 0.1305766 0.5355303 0.4808776 0.4774906 0.7556046  
1.022515 0.6497347 0.2433803 1.572039 1.697574 0.1582909 0.1367376  
1.125076373 1.048315 0.7561249 0.226775255 0.2236922 0.4968301  
1.109832 1.118242 0.4159614 1.197807903 1.676218 0.1159342 0.3440035 0  
0.6770686 0.171343596 0.3165609 0.1224483 0.345592 1.174735486  
0.083621091 2.333996 0.1840372 0.9563867 0.543792525 0.5258222

1.229471 0.371049262 0.3970205 0.9572491 0.05454769 1.329566 0.3530383  
0.9060627 0.914997479 0.9003126 0.383136507 0.2837045 2.338288  
1.695944 0.1844177 0.5048232 0.2896645 0.5586648 1.066146594  
2.451828 1.568878 0.050696542 1.762483 0.04179651 0.4072314 0.5414867  
0.7267468 1.29553 0.5963951 1.808464 1.308652459 0.1236354 0.198855694  
1.433037 0.5828971 0.4517842 1.277849041 0.698946747 7.0675 2.175417  
1.724825 0.7806547 0.6253649 0.219886315 0.08087775 3.888986 0.2387427  
0.935518909 0.07363513 0.08871994 0.203433667 0.02737559 0.258737794  
0.1616862 1.513091 1.15637114 1.102489 1.076779 3.49376914 0.836371967  
0.1533368 0.09585946 0.7701369 0.7812599 0.7739925 1.232135  
0.6760757 0.2708563 0.4897735 0.670475373 0.06138307 0.183247994  
0.4140977 0.305893617 0.4051559 0.228411 0.660915808 0.4732068  
0.3119828 0.2087415 0.341169477 0.4978687 0.1675154 0.100274604  
1.70131387 0.1324584 0.3147511 0.711464 0.973682599 0.782304797  
1.30911419 0.1765522 0.1321278 0 0.2844175 0.2799436 0.1444576  
0.2483312 0.3741556 0.6492082 0.1313273 0.2386609 0.304381608  
0.4534079 1.008121 0.6726672 0.5406417 4.996075 1.30515 0.3213583  
0.2017204 0.7020298 0.1819325 0.979731534 1.412334 0.2472453  
0.9091251 0.611031 0.818059353 0.2048068 3.049727 1.116031 0.2272625  
1.430857 0.05508964 0.2528043 0.813965706 0.2536292 0.2882213  
0.226554002 0.2434117 2.072901 0.8051312 0.6552756 0.7482988  
0.315536138 0.811206629 0.9485613 1.853138 1.861632 0.148215678 1.089623454  
0.4236159 0.3817428 0.3782168 0.08446605 1.387846 0.7968878  
0.1987921 0.2892937 1.855690333 1.141950882 0.2582999 0.827801335  
5.479111 0.242558621 0.6597328 0.6592235 0.142912 1.974097 0.8058047  
0.4884526 0.9596406 0.1139785 0.4948982 0.938724389 2.20499  
0.4457884 0.3942232 0.5496021 1.041033665 0.4366454 0.2566138  
0.9175833 0.355130404 0.570919 0.1205919 0.2333427 0.06076566  
1.187544 0.308758 0 0.762474618 0.83598624 1.044948586 0.2646869  
0.089961961 0.286667563 1.640149 0.3128899 1.22918196 0.5372224  
0.09020641 0.2183965 1.207313873 0.2815491 0.1490773 0.1109765  
0.104829752 0.03492598 0.2191489 0.2632669 0.4128282 0.3980068  
1.151745 0.5806133 0.8178897 1.145977 0.7389969 1.14628 0.113322545  
0.3552197 1.030364 0.3473188 0.482675 0.1579874 0.1857661 0.09016264  
0.164991802 0.152808126 0.176933113 0.02705592 0.7128599 0.2120242  
0.6739705 0.7016498 1.631786685 0.3641035 1.719866 0.09593321  
0.1901779 0.3058472 0.119423237 0.4376718 1.297781 0.5480803  
0.6589314 0.5642931 2.40062 1.185302 0.86312117 0.3076967 0.3962101  
0.341680648 0.1696377 0.7820801 1.564857 1.616584 0.64966 1.383862313  
1.514356804 0.367824878 0 2.748944 0.173166 0.4921848 0.7546939  
0.2559909 0.514096005 0.5351891 0 0.06331152 0.1624244 1.257988  
0.7230833 0.06432245 1.502461881 0.09949031 0.232272 0.7512273  
0.4929192 0.115232 1.627846 0.878855 1.105564081 0.7678369 0.653002297  
0.2005624 0 1.1271369 2.263567 0.3411283 0.5980097 0.701746279

0.1302581 0.9484896 2.420844 0.548096015 0.3704695 0.3152255  
0.02276599 0.187319 0.3805093 0.8857646 0.2862728  
AC011498.6 0.2479764 0.26604919 0.1601228 0.491949602 0.573295698  
0.586223091 1.079185 0.318388108 0.1252052 0.1852972 0.621669888  
0.9572806 0.1389309 1.095935 0.7099061 2.210388 1.002347 0.652899847  
0.4013105 0.6564442 2.08963931 0.3427608 1.351708957 1.942488  
1.025044 1.101693739 0.5030666 0.09973029 0.06657666 0.3240555  
0.2002533 0.491832428 0.5661195 0.601497693 0.5027137 1.320292218  
0.602896093 1.080747745 0.5451871 1.032227 0.690889505 1.371876 0.064284324  
0.2094487 0.283736933 0.7768944 1.186592 0.8268162 0.115528005  
0.2072777 0.2426022 3.388106 0.77830771 0.5690071 0.367306926 1.41003  
0.2511792 1.774652 0.1447858 0.9351742 0.1929971 1.014243 1.090825578  
0.4427094 0.6651275 0.4672599 0.2519793 0.2854918 0.8672827  
0.3452924 0.0498644 0.43668566 0.0937989 0.1876225 1.551540576  
0.3827848 0.122731878 1.187121 0.1731953 0.7347943 0.5500495  
0.5423015 0.6364855 0.103618856 1.440628245 0.4412298 0.4611222  
0.3213675 0.344078526 0.1487314 0.1611263 0.0795331 1.930475286  
0.8271347 0.2923203 0.877109842 0.1210912 0.184121801 0.160509992  
0.1981063 0.647952233 0.5935268 0.615765 0.064555599 1.36376 0.4584054  
0 1.651288 0.886425239 0.840671803 0.05897501 1.704225477 0.03459446  
1.490451 1.580532 0.4326523 0.6823165 0.783184965 0.5709617 0.5431507  
0.8694397 0.08737639 0.3006702 0.8612565 1.319965 0.4730027  
0.9006262 0.3827497 1.348308 0.836024829 0.584081558 0.4235477  
0.927033249 0.71766999 0.1415632 1.494410906 0.5066451 0.1044999  
0.035400882 1.469538651 0.072697858 0.491226526 0.4537434 0.54175 2.02322  
1.611298 1.219336 0.2724146 0.601559275 0.7071489 0.9029995 1.141419725  
0.8421234 0.3787264 0.495125445 1.136533 0.1224008 0.904338351  
0.2564425 0.3069885 0.1110598 5.19451 1.268012 0.3808185 1.557445417  
0.9708488 0.6573783 0.331504325 0.2740727 0.476244641 1.665701  
0.2824018 0.276296333 0.8980594 1.487229561 0.8472727 1.280617  
0.09074434 0.610773 0.09511164 0.514957546 0.1287898 0.2675209  
0.2415491 0.5523944 0.9311155 0.3232192 1.260254 1.128872 0.82021565  
0.116381911 1.20968 0.4180443 0.3571596 0.08085388 1.189599936  
0.7313839 0.635546842 0.5403324 0.5718379 0.166021367 0.526502827  
0.03546544 0.6364185 0.655281965 0.4573663 0.03051909 0.9222837  
1.251653 0.7278374 0.6938017 0.6391533 0.3796489 0.3081226  
0.4124166 1.777182 0.1849831 0 0.836687813 0.9256231 0.5890856  
0.795047365 0.5555023 0.881666 0.3814646 0.5544033 0.2970635  
0.933194131 1.119357 0.1625806 0.9246275 0 1.210133 0.13349122  
0.08220927 0.4769881 0.5769547 0.854204174 0.781775223 1.086406  
0.1613032 0.9861703 0.317745436 0.3253183 1.359823 0.588482051  
0.2855194 0.9322229 0.1274918 0.3606959 0.09520851 0.6515998  
0.605931664 0.3054571 0 0.5180388 1.590611 1.277242 0.06465467  
0.321791 0.07253783 0.4488488 0.138436464 1.627192 1.938201 0.118490741

1.073358 0.0976891 0.6458668 0.5932465 0.5169629 0.04091871  
0.4768699 1.467653 0.563436332 0.2167256 0.174291167 0.2537403 1.27723  
0.3167805 0.616809998 1.021010444 2.855058 2.255224 1.209407 1.094753  
0.3654093 0.256965184 0.2362899 2.541993 0.4030018 1.473541974  
0.02868401 0.2419213 0.475476335 0.06398374 0.302368089 0.4048949  
1.041998 1.27629111 1.317681 0.8305135 0 0.849919339 0.1791935  
0.224048 1.125004 0.6225012 0.7914453 1.439907 0.7461872 0.9208148  
0.3679475 0.57913525 0.1434679 0.122370649 0.1116752 0.422471255  
0.8116738 0.2335615 0.31466696 1.431301 0.06628939 0.243941 0.119610005  
0.618187 0.2283902 0.322255049 0.837137723 0.4953423 0.3941001  
0.2969416 1.422340267 1.018705474 2.496098428 0.1031619 0.1158061 0  
0.2437439 0.1453999 0.361751 0.3627583 0.03123203 0.7586825  
0.1023151 0.195234 0.406524232 0.5298649 1.592052 0.5390382 0.2843139  
2.835867 0.3813085 0.513908 0.176802 0.5195938 0.6732693 0.740844283  
1.604645 0.1926251 0.8387594 0.3570338 0.404464337 0.33508 1.819122  
0.7927636 0.1180379 1.083794 0.2253274 0.09090277 1.180828139  
0.2963981 0.2072759 0.079427168 0.2844576 1.406583 1.990362 0.6479618  
0.7745416 0.51624187 0.947998335 0.3483904 1.624221 1.27739 0.129906682  
0.561778182 1.845183267 0.4142497 0.4735656 0.3948374 0.4230979  
0.4048978 0.1991262 0.101423 2.026406686 0.667257574 0.129367 0.564311629  
4.044025 0.566921326 0.5256694 0.6419889 0.1670109 1.472543 0.6611834  
0.7025466 0.5607312 0.04439947 0.2891758 0.658211454 1.624512  
0.07442294 0.06142667 0.7225651 0.946229292 0.632742 0.9853394  
0.6346342 0.359679787 0.5003937 0 0.09089688 0.1420248 1.301059  
0.04244977 0.5797793 0.891048769 1.63876569 0.949787691 0.0927961  
0.280352046 0.301506826 1.37504 0 0.757403957 0.3531447 0.07906326  
0.5671647 0.686383849 0.1794687 0.1742158 0.1296902 0.490027703  
0.2040773 0.448181 0.307661 0.1855548 0.2325608 2.067011 0.7056615  
0.4391552 1.236204 0.5860225 0.6819652 0.066215918 0.4670095  
0.7135474 0.3434422 0.3172879 0.05275097 0.05427283 0.2634164  
0.024101744 0.089287885 0.344614822 0.1264732 0.657685 0.08259241  
1.181431 0.8199672 1.296726485 0.319126 1.622011 0.08968815 0.2222472  
0.1191405 0.093040848 0.4546447 0.4381355 0.8065576 0.8983862  
0.9891727 2.642007 2.392577 0.524506888 0.2397219 0.6734865 0.465846949  
0.04405405 0.6397722 0.8896546 1.441746 0.8806842 0.997858833  
1.032336044 0.238805694 0 1.606246 0.1264791 0.2353012 0.4777262  
0.1903733 0.918850253 0.3822113 0.133271932 0.1109814 0.1518509  
0.9800796 1.143256 0.3006759 0.83800414 0.2906678 0.5428788  
0.2701246 0.6973102 1.043641 0.9964669 0.513527 1.022827423 0.3713029  
0.590799801 0.1464892 0 0.576276366 2.461568 0.5073751 0.4659004  
0.538177477 0.1268527 1.182326 0.4659637 0.337115815 0.1443136  
0.3683812 0.07981489 0.7505351 0.9634595 1.242155 0.4374835  
AL021878.2 1.148988 1.214510264 0.3684029 1.310016171 0.732783975 0.749307711  
0.8621309 1.017405609 0.240055 0.0473692 0.317846259 0.8996999

0.8168721 2.67429 1.85425 1.52132 0.309254 0.27817788 0.5129532  
0.4857739 0.542540281 0.6770873 1.398653378 0.7556591 0.9280626  
0.795927807 0.5414884 0.1274748 0.2978429 1.150573 1.493117 0.392911244  
0.9867429 1.127619735 0.9236892 1.472807177 0.616495253 0.932449652  
1.63966 1.195696 0.69911438 1.529671 0.328671731 2.175195 0.64474892  
0.8440694 1.092021 1.321041 0.47991897 0.370918 0.6890958 1.51953  
1.468557692 0.4848682 0.187796022 1.378225 0.2407921 0.5670881  
0.1850646 0.5976677 0.246688 0.9913654 0.823897651 0.4629839  
0.1619358 0.6470203 0.1288315 0.5307845 1.50447 0.5394292  
0.8923103 2.204770081 0.2397867 0.09592732 0.440704926 0.5150251  
0.251000532 0.8170468 0.2582736 0.6708648 0.3515354 0.06301521  
1.200959 0.220741924 0.772201897 0.3588951 0.2080251 0.821541 0.839617456  
0.3802157 0.3775767 0.237204 1.957002429 0.9397688 0.5230995  
0.240239538 0.1031855 0.235343655 0.205163147 0.1519311 0.34871984  
0.4046098 0.5411093 0 1.859362 0.5859317 0.362796975 0.6819084  
1.081523617 0.608907647 0.4522895 0.96814814 0.6632773 0.6626393  
1.759554 0.4021922 0.8721339 1.223522041 1.094701 1.272797 0.1389142  
0.2233682 0.2795021 1.100854 0.6748694 1.934688 1.151176 1.223072  
1.216518 1.53611705 1.761906175 0.2320186 1.015654043 0.792233106  
0.5790252 0.709484018 0.4625653 0.3561902 0.135747742 2.106037392  
0.309740248 0.784854412 1.918371 0.6924624 0.7183531 0.2860492 1.42867  
3.525516 0.869203006 0.3389529 1.990017 0.99209113 0.7931357 0.8471512  
0.744549542 2.196783 0.3129042 0.323657936 0.8522374 0.3923913  
0.248423237 1.312479 1.307071 0.2433803 0.716659094 0.7031963 1.194051  
0.346686 0.3795117 0.405822501 0.5888978 0.2578319 0.485595999  
0.629491 1.950995645 0.7821523 1.46637 0.231978 0.5576338 0.2026188  
0.482692036 0.6173193 0.1367776 1.058561 1.194884 2.380295 0.2409968  
0.9475596 1.485358 0.725812576 0.446276499 0.8433863 0.5343424  
1.065213 0.5684089 0.682691999 0.7011387 0.692004498 1.015662 1.860525  
0.185681792 1.435676882 0.3626541 0.2711558 0.651449906 0.2923018  
0.5071217 0.7578378 0.9795047 1.147393 1.975177 0.6393623 0.1819746  
0.1211818 0.8626075 0.8452413 0.4334818 0.8169985 1.48959189  
2.122669 0.6274721 0.290350273 0.1670683 2.143938 0.7801382 0.5061684  
0.2761493 0.383401455 1.56489 0.4156197 0.6166198 0.05439044  
0.8328852 0.127970906 0.2626988 0.6096841 0.3318574 1.286811336  
0.374723086 1.654549 0.4810797 0.5042074 1.353802609 0.8316409  
0.9838411 0.593838239 0.5018058 1.286888 0.2036994 0.8511505  
0.1622601 0.6767085 1.640115782 0.7374863 0.114460831 0.5297239  
2.293767 1.632565 0.275471 1.165384 0.5253993 0.5737165 0.743185228  
0.5425747 1.004351 0.189317914 1.112401 0.3745973 0.6517453 0.8846658  
0.5663826 0.3661148 0.4688715 2.063542 0.617298667 0.2770177  
0.222778183 1.297319 1.088367 1.214722 1.493817644 1.14844483 3.388656  
0.5241122 1.4170370 0.1167661 0.164225869 0.1510123 2.06765  
0.3566181 0.729086982 0.5499566 0.08834935 0.202583902 0.1226756

0.496909963 0.2760186 1.210798 0.959617376 1.646826 1.190232 0 1.086363065  
0.3817406 0.07159429 0.65736 1.379176 1.011622 0.7440248 1.290399 0.55171  
0.6270784 0.653160056 0.137535 0.782068058 1.189523 0.498462325 1.642673  
0.2985372 0.475334232 0.6652661 0.1694616 0.3637717 0.356731594  
0.2324011 0.1251117 0.149783618 1.003149057 2.730435 0.503737 0.4554592  
0.681760842 1.068393634 1.337952347 0.1977916 0.3453868 0.1293975  
0.2832294 0.8363227 0.308259 0.231838 0.2395239 1.593152 0.621199  
0.5347441 0.454665259 0.6434074 0.2848934 1.234451 0.9287113 4.79752  
1.46216 0.2779086 0.3013167 0.8039619 0.3623451 1.635630235  
1.347833 0.1846594 1.786831 0.2147572 1.362959114 0.5506686 1.091418  
1.83049 0.1885943 1.3853 0.1645786 0.726197 0.964293656 0.5998533  
0.2980565 0.406093791 0.4155342 0.6991789 0.5550702 0.4141109  
0.4471038 0.251374487 0.19543987 0.8096564 1.543745 1.683777 0.055348712  
0.813803983 0.460196083 0.4073016 0.2824777 0.7149624 0.495735  
1.035077 0.805987 0.08642559 1.726762589 0.355369009 0.3307127 0.515214699  
3.98448 0.289854512 0.7167022 0.3282349 0.4625238 2.133158 1.741463  
1.655673 1.180487 0.2270048 0.6864431 0.654362264 1.43203 0.1426906  
0.3925764 0.1026199 1.612621349 0.8087679 0.3285538 0.9230744  
0.671929272 0.7462012 0.3242381 0.2904599 0.3176871 2.2543  
0.5154615 0.114011 0.841821165 0.805639581 1.676495996 0.3953719  
0.13437927 0.128461555 1.81083 0.292109 0.634279176 0.4263109 0.336861  
0.2899789 2.242072556 0.2293961 0.1670114 0.4144236 0.626351199  
0.1043403 0.6547004 0.2145005 0.4743505 0.09908606 0.983086  
0.3816041 0.1981151 2.106813 1.419255 0.8094217 0.253910664 2.155578  
1.425083 0.8380647 0.9012354 0.4382694 0.3468564 0.2020186  
0.24645392 0.190212287 0.440485111 0.2020718 0.9527366 0.563036 0  
0.928298 0.926233204 0.3625826 1.397188 0.4298962 0.1420377 0.2664984  
0.267579884 1.016968 1.335439 0.5154692 0.6971902 2.835223 1.636279  
0.8047846 0.825135186 0.4213157 0.8070445 0.340253411 0.2252388  
0.8761649 1.010802 1.270919 0.5046181 1.407402657 0.895393507 0.610480722  
0.1297711 1.010755 0.5496609 0.6015218 0.4697134 0.2085722  
1.129298315 0.5329536 0.056782527 0.0945706 1.358666 1.774706 0.4765122  
0.4483764 0.714088741 0.3715302 0.3035835 0.474749 0.5037776  
0.2151575 1.042101 1.658243 0.688091262 2.214789 0.440508624 0.2246902 0  
1.578415395 3.052443 0.7874941 0.4168582 1.179250326 0.129714 1.133433  
2.850336 0.387809923 0.4795986 0.3766905 0.3400635 0.07994422  
0.6157448 0.7938582 0.7565505  
AC005899.6 0 1.827408575 0.4949251 1.055952429 2.196074429 1.143915582  
0.7528405 0.765417876 1.074994 0.4454619 0.320254185 0.6768651  
0.8111321 1.083523 0.8480214 2.433087 1.068332 0.694039761 0.5300915  
0.7712609 0.168200134 1.123651 2.210587038 2.36875 0.8800879 0.658016462  
0.77292 0.08562701 0.1714853 0.9274315 1.719347 0.844560735 1.369812  
2.823191191 0.8632458 1.854956009 1.863497016 2.041412406 1.541943  
2.049467 0.840349608 2.455991 0.220774446 1.168893 1.245130648 1.267358

2.771111 1.30147 0.198381423 0.1423726 1.805222 3.368292 1.400130272 1.13993  
0.378437439 2.278837 0.4852326 2.557625 0.04143703 0.6423419 0  
2.407547 3.320557201 0.2764393 0.2719377 0.8692293 0.3894225  
1.158745 1.91478 0.1976421 0.2568772 2.849484207 0.1073792 0.06443603  
1.134778087 0.6227122 0.168601368 2.09076 0.7930826 0.7210102  
0.09445294 0.2539704 1.873637 0.177931369 2.793006861 0.06887885  
0.419202 3.010054 0.698267716 0.4597154 0.2766816 0.09104799 1.60032434  
1.025796 1.455696 0.914447129 0.2772459 5.53295311 0.220498575 0.6123285  
0.351361657 0.2717833 0.1982577 0.665118288 1.092845 0.06055082  
0.348138511 1.003347 2.144839766 1.395458582 0.1519053 1.246449984  
0.4158324 1.446595 1.138148 0.3376993 1.171655 1.419577685 2.941318  
2.642602 0.7931442 1.250336 0.563239 1.568557 2.065131 0 1.000696 1.971741  
4.630552 3.947895026 1.364036932 0.6234035 3.032143382 1.568461502  
0.6320295 1.686333808 0.6214262 0.1196295 0.182368178 3.976345783  
0.249669412 0.790800278 0.5993502 0.8208334 1.978374 1.383438 2.966229  
0.9355652 1.302453766 0.758935 1.390198 0.705604921 1.826615 0.853569  
0.200050685 1.380416 0.4729121 0.869626374 1.321067 1.355534 0.238385934  
1.815089 2.317872 0.2335467 1.123248513 1.667114 1.604129 0.103499973  
0.1960958 1.567438169 0.9737175 0.4156563 0.770978405 0.1492376  
3.024270639 1.859055 5.314343 0.6752356 0.1997718 0.272205 1.296930116  
0.4423082 0.3215655 4.029304 2.480839 0.07994426 0 1.145686 2.223536  
0.758396755 0.133231817 6.042848 0.4785693 4.56571 0.48594 1.125595486  
1.412901 1.414703968 1.473634 4.284846 0.249451296 1.567099324 0.243601 0.36428  
0.812667307 1.439857 0.5240651 0.4524913 1.228174 0.9998574 1.787065  
0.7157844 0 0.04069995 2.446475 2.342023 0.1588239 0.6036711  
0.872304394 2.337432 2.950387 0.32505544 0.2244454 0.2954092 1.703105  
1.768011 0.2782413 3.376600696 2.642925 0.5583578 0.966453 0 1.43862  
0.744988878 0.8470046 2.047676 0.5449016 1.362042731 0 1.468621  
0.4154779 1.185397 1.151871783 1.551743 1.850416 0.850968197 1.777286  
2.241102 0.164194 0.7146655 0.3269787 0.699318 1.71374612 0.8159236  
0.153770612 0.6760669 4.412184 1.739469 0.1850386 2.394472 0.2491198  
1.261228 0.855789051 2.61194 2.608608 0.254336187 0.9464771 0.2935607  
0.7588334 0.7130942 1.902244 0.9837023 0.3779389 1.512127 1.520383753  
0.2481034 0.548694414 2.527151 1.120981 0.7857294 2.006845925 1.612990236  
0 1.267398 1.153755 0.4699699 1.254941 0.220626673 0.6086255 7.275065  
0.3726279 0.979480491 0.4432984 0.05934577 0.725755124 0.1648066  
0.44504394 0.231758 1.626627 1.28918294 1.055919 0.90754 12.46411616  
2.55405054 0 0.43282 1.87663 1.140204 1.359047 1.788666 1.507449 4.941241  
0.4212194 0.760480631 0.06158974 0.262664272 0.5113747 0.167412852  
1.509932 0.2864751 1.326282228 0.2792942 0.2276605 0.2094443  
0.342318196 0.06244313 0.3361588 0.201224457 1.078131916 0.1063235  
0.3609267 0.5778863 2.076042106 1.255902112 2.557911227 0.3542933  
0.7291498 0.173837 0.2663501 0.4369341 0.3313006 0.5606265  
0.6971999 2.605576 0.3074621 0.6226077 0.436294946 1.137336 0.7107947

1.157026 1.084924 8.450312 1.309544 0.5091163 0.3035994 1.643585 0.4259386  
2.255187143 1.259635 0.2480777 1.728353 0.3967042 2.020464643 1.232978  
6.119991 1.053918 0.1520185 2.392792 0.3869259 0.1560957 0.61957032  
0.5513803 0.6673656 0.090926724 0.5582429 0.8051151 1.367117  
0.4551798 1.372925 0.633197098 1.575363802 0.4894741 1.573319 0.2741872  
0.07435736 0.836046992 0.772804029 1.149084 0.542129 0.9605051 2.603405  
1.738198 0.5129008 0.3483213 1.343037569 2.29159167 0.2221454  
1.522745666 19.38613 0.58410076 1.384086 0.8084305 0.4779772 1.770027  
1.445011 0.3392981 1.642546 0.07624151 0.3546889 1.444223786 2.50099  
0.4472894 0.4746606 0.4135894 0.851105712 0.6659357 0.5149556  
0.8267266 1.615345118 0.6205781 0.3387942 0.3902139 0.9145539  
1.43978 0.4009145 1.991161 2.86059135 4.491644111 3.184232903 0.2655781  
0.361059453 0.057526555 1.073264 0.1569717 1.345440676 0.5727207  
0.3167855 0.2921757 1.506038636 0.513631 0.2243688 0.5010758  
0.560974475 0.5606971 0.3848018 0.2401394 0.5735329 0.3993468  
1.981067 0.3728437 0.5766684 4.776242 1.535934 1.129228 0.284260255  
0.4455197 0 1.608407 0.4843002 0.2264562 0.7455661 0.1809324  
0.206934162 0.357752807 0.295881413 0.3257642 1.204649 0.4727512  
1.062662 1.689629 1.113351023 0.6088824 3.088018 0.1540099 0.1908183  
0.05114617 0.159767114 0.731909 4.28263 0.5702933 1.101917 0.6176652  
2.712714 1.946115 1.17779713 1.080565 1.8793 0.285692573 0.3025935  
0.7847134 1.400382 1.920821 1.042956 0.768118433 2.025940865 0.492084461  
0.2324519 1.357883 0.521247 0.1346842 0.8834408 0.4670051 1.031653936  
0.8353195 0.61026878 0.1905741 1.238582 0.2103706 0.896228 0.4302602  
1.370473341 1.497379 0.349581 1.043663 0.2603046 0.8093401 1.633327  
0.8818141 0.231101358 2.550363 0.422710295 0.4024754 0.6059044  
0.895321146 3.343694 0.6223216 0.4000155 0.792122694 0.1306967  
1.522693 3.200559 0.347331446 0.3469357 0.06325737 0.04568529 0.1073998  
0.4454222 0.6602121 0.7512343  
LINC01094 0.2410648 0.801354532 1.405782 0.984816087 0.876464111 1.570346844  
1.113218 2.074431772 2.055639 2.151984 2.62687654 3.162822 0.4513961  
2.117864 0.928161 1.067656 2.652186 1.235822435 2.710203 2.854126 1.551761655  
2.525645 1.735359516 2.014237 1.402444 2.235104207 1.391062 1.361618 0.9377359  
0.454256 0.09805695 0.823435984 3.322057 2.3839773 1.292346 1.526708626  
1.52644465 2.470136683 1.790194 0.8585134 3.079562123 1.195546 2.160855139  
0.08596907 2.168489876 0.1678313 3.30573 0.5358475 0.808617741  
5.409169 1.942627 0.8012678 1.742215642 1.024348 1.421929624 2.551529  
1.448792 0.6188774 2.527251 0.9939593 2.017935 0.5619408 0.642680114  
1.411962 1.13307 3.956905 1.580784 4.548204 1.386447 5.84146 1.852806 0.528284584  
2.734186 1.893646 1.43008823 2.224861 1.959883772 2.041094 0.3492076  
0.3537556 1.606532 1.218387 1.136658 2.172800686 0.602354919 1.49043  
1.748546 3.312181 2.859706898 0.7454212 3.689635 1.182081 1.150448586  
1.671694 4.774103 0.795818909 4.331955 1.018254081 2.246922318 1.164067  
3.948800191 4.403885 1.57632 1.026414328 3.084905 3.863639 2.494705595



2.309384 1.852260373 6.121435343 1.039607 2.187150321 1.004423 0.5263671  
0.8194559 1.23714 4.443434 2.105478612 0.5427135 1.411943 3.512304  
0.3372474 1.766731 1.944003 1.840168 0.8092818 4.243717 1.190662 1.699663  
1.191994059 0.944822679 2.504441 1.03756638 1.668763465 0.4795206  
4.102775395 4.146582 0.7223987 2.398286768 1.454553983 12.827686125  
3.475394378 0.1628665 4.89062 2.11252 2.568103 0.8487696 0.423715  
3.548307217 4.246847 3.363338 7.32241447 3.469935 1.190418 2.4512988  
1.561769 0.9466254 2.069283049 1.497986 1.561321 1.909769418 2.802795 1.37847  
0.6957492 7.509620749 2.209166 2.559213 3.463531372 5.245785 1.934189094  
0.9432373 2.112579 1.581728628 2.758646 0.58169299 1.749001 1.457021  
1.003692 2.322221 3.271054 1.228150189 0.951521 3.194748 0.4472699 1.226375  
0.9333242 2.052842 0.7238668 1.176307 2.18079911 2.641565698 1.007291  
1.800169 0.1097339 1.760647 2.45449236 0.6872989 2.038085941 0.8898731  
0.2515586 1.402334835 2.080676371 0.8642222 0.8860113 0.994062666  
1.692844 2.816526 3.387072 2.75911 3.945515 1.351653 2.703875 2.886927 2.207852  
1.574529 1.82854 2.237851 0.480523 2.029546138 0.8045487 0.7974913  
5.986814037 1.942658 0.7841582 1.793181 1.259263 0.5460639 1.284457671  
0.6710308 3.662059 1.042152 0.161789 2.86359 1.493803391 1.420763 1.335437  
4.955632 1.312816334 0.945759928 2.496751 1.09649 1.812268 1.04946081  
1.874081 1.277026 1.273965138 1.529672 1.372652 2.054623 0.2781165 1.672843  
3.117925 1.410623697 1.76553 1.191657105 1.930243 1.423809 0.7992183  
1.106206 0.5375906 2.218905 1.015479 1.660393158 1.962398 1.448499 1.44881131  
0.7770974 2.393151 2.461525 5.081897 2.054888 4.462233 0.7861026 0.4210488  
0.605113764 0.9176506 2.038220322 1.175236 0.8289806 0.2859004  
2.844505183 0.861094813 0.969216 2.388129 3.315179 1.797384 2.636556 3.863620878  
1.719207 5.830899 2.882351 1.224018699 0.7188013 3.744938 1.853460784  
3.206776 2.59787425 1.963967 0.9495183 3.165859345 0.9665673 1.209145  
5.64496484 1.623083848 2.714925 1.335861 0.905471 0.8534869 2.72094  
1.869013 1.748521 1.273102 1.632136 0.565201464 3.024931 1.427519348 0.2637669  
1.780385471 0.1461205 1.925975 1.146957725 4.233252 1.947574 3.014337  
3.831086976 2.834317 5.255286 3.16943862 1.130284857 1.187789 2.211288 1.9672  
3.048078565 1.250445501 0.800145237 1.854187 0.7938863 5.274932 3.178485  
1.212446 2.246509 1.611208 2.439718 3.905432 3.028108 3.364448 0.728912688 1.37817  
0.8804569 0.9820414 0.7534175 1.066694 2.009913 3.897612 1.644899  
1.720334 4.635878 2.613073109 1.212281 2.247075 0.8214214 1.861996 1.963572747  
0.5873674 1.398696 3.049524 2.799849 1.032849 1.568795 2.234757 2.437550463  
3.816213 0.9627162 1.185082414 0.582906 2.714501 1.463478 8.169637 1.416309  
1.181081026 3.572675266 6.267292 1.713004 2.418034 3.000928004 0.744341814  
1.384447909 2.208331 1.980599 2.325741 0.5240334 0.9796578 2.896473  
1.186075 2.033671088 3.459519108 0.9837329 1.191209207 5.926086 1.665607554  
4.136596 3.372889 0.5002968 1.077337 1.229242 0.9751226 7.325038 0.7596507  
2.777247 2.06021003 1.21014 2.964686 3.742114 2.1992 4.290714903 2.532738  
1.54741 1.44474 0.745930293 1.013731 2.990843 1.201742 0.5706742 2.468382  
3.495741 1.017406 1.526544442 0.642682527 1.485120899 2.63546 0.829727104

1.476371952 0.9001451 3.191244 3.069300789 3.672059 4.254038 1.470285  
2.701962852 2.057413 0.2860303 2.745644 2.364205157 0.7547609 1.222696  
2.842222 0.7311524 1.587576 3.032271 1.815244 1.294697 0.5044376 1.066085  
1.839444 2.254392851 0.04035494 0.8786353 0.1402928 3.332723 3.487088  
0.8300929 1.620667 0.420698344 2.525537035 0.857624958 2.830539 1.917115  
0.6328074 0.9139401 1.085086 4.989606656 1.096917 0.8714308 1.941394  
3.293604 1.992101 0.932615486 0.643316 0.5824599 1.865387 1.41399 0.207214  
3.629256 0.297424 1.617695566 0.6421557 0.5965183 1.150128014 1.484641  
2.922133 1.904823 2.35849 2.42474 2.783030255 1.847830044 0.536523806  
0.1988563 2.707627 1.4208 4.721705 1.981487 2.617966 2.308682216 0.4383638  
1.182331136 5.638952 0.9710017 0.5081402 2.117549 2.212785 2.16549649  
0.5827145 1.718112 3.979783 0.4139294 0.3781844 1.142863 3.204312  
1.186205446 1.213875 1.684710378 4.025351 1.768436 1.531845633 1.136556  
3.983448 1.892177 2.170217546 1.727535 1.021665 1.282714 2.004188364 3.790983  
1.406989 0.4551964 4.874918 1.626653 1.896275 1.854598  
AC099850.3 0.4924765 1.268084922 1.729925 0.586201629 0.910843632 1.227731453  
2.464727 1.669305876 0.4973102 2.296299 2.518634547 8.767617 1.059511  
1.530149 0.5884634 0.2251174 1.427771 0.69154501 10.10345 5.489204  
1.556244229 2.52484 1.533982127 1.654917 0.7464297 1.598149796 1.892995  
9.269324 2.168408 0.2288242 1.166585 1.611670515 2.125954 1.401620792  
1.297894 2.250217664 1.96363821 2.189271716 1.426658 1.33249 3.018606014  
1.298494 0.868138767 1.039903 2.25398498 0.9874545 2.036058 1.204164  
1.835491675 1.778327 2.098522 0.897162 1.589867552 1.205373 3.151287456  
2.108457 1.047558 1.208375 3.067114 0.1485791 1.073208 1.04268 1.024097081  
1.40674 10.01391 4.701712 1.841568 2.020516 3.29718 2.499157 1.980595 1.144769418  
2.086368 4.41176 1.415129601 2.048548 7.253798088 3.965604 0.6420634  
0.1667757 4.107379 5.326258 2.889253 4.170578263 0.886005915 1.402039  
0.9050063 0.8819177 1.590303469 1.559595 1.066646 1.389971 1.533555134  
2.044217 3.390369 1.045154251 1.603233 1.901444767 2.703168273 1.447842  
3.467644019 2.451765 10.27234 0.205129939 1.203734 1.904804 6.377767377  
2.179558 2.560616664 3.027466056 1.077534 3.610197271 1.264153 0.4633056  
0.4860244 1.937194 1.675357 4.424222437 0.9071354 1.546118 3.971389  
0.6478374 0.2605638 1.368352 1.724316 0.1502999 4.292705 1.085905  
0.3780302 0.913181326 1.299172064 1.922646 0.911768349 3.265185043  
0.7647057 7.801263877 3.047311 1.549594 0.168733174 0.495256583  
10.510615577 3.219370105 0.554539 3.999837 3.52698 0.9955582 0.3766899  
1.136122 1.329736878 2.902394 2.424101 6.020722364 3.027999 2.068395 1.573295808  
1.717623 1.458514 2.758654557 1.14081 0.6967696 3.88190329 0.9596465  
1.884625 0.9939923 4.008602502 2.570783 1.264313 3.064373031 1.16118  
3.467980832 2.984285 2.820248 0.932822901 1.426823 2.114163026 2.168772  
0.5510441 0.961155 0.3696712 1.51112 2.345382966 1.38118 0.807563  
0.3289454 2.362866 0.5177699 1.583371 1.707821 1.055021 1.102662304  
0.554717518 1.747202 2.324639 0 0.5780675 1.658587742 1.743018 4.038989274  
1.514951 1.651868 2.769608785 0.948033128 0.5071226 1.741394 0.925424166

0.6055473 1.40616 27.73624 3.003204 1.079285 1.653453 2.869827 1.432554  
1.543936 1.727454 6.303762 1.91034 1.015521 1.993975628 0.8218149 1.403896  
9.804522686 1.090238 0.5808103 3.030326 0.8808277 1.287191 0.264758014  
0.7780575 1.765089 0.4470974 0.06760681 1.774746 0.265111067 1.502048  
0.454699 3.712461 1.308677289 3.726218353 1.542441 1.195955 3.342534 1.682763991  
2.29716 1.304432 2.46045127 1.757812 1.777322 0.9115071 8.243366 2.218566  
5.9527 1.528986441 1.401994 0.640231845 1.679027 1.101573 1.399492 0.6848158  
0.1704189 1.15247 0.6482948 43.813200191 1.798441 0.7490396 2.400268055  
0.8757124 0.5432244 1.620227 1.413812 0.8800103 2.730463 2.680893  
0.4663571 0.511530982 0.3443305 1.846074666 0.8869055 1.443018  
0.3355307 2.527312976 1.03818632 1.296021 2.475573 1.120868 0.144944  
4.692835 2.789793352 1.576738 3.671528 3.201416 1.132810381 1.093745 3.239614  
4.322736565 1.016564 5.764774774 1.758329 1.304342 5.069380578 0.6047923  
1.199552 5.04534609 0.742686525 1.2337 2.269271 1.378843 1.450563 1.302345  
2.823122 1.115794 5.577599 0.5196351 0.865996635 1.253668 2.527468547  
0.2957132 1.54896003 1.020914 1.802383 1.22712094 2.377394 2.63299  
2.906774 0.25337945 5.546351 3.473117 2.932329293 1.745666863 0.9837405  
1.627965 1.950009 2.259792947 1.784504437 2.430629461 3.769747 1.410598  
3.055958 3.872567 1.790321 2.835406 1.037421 2.084081 7.662795 2.194516 3.190473  
1.695434005 0.7576573 3.692964 1.213256 1.455522 3.180412 1.211635 3.171747  
3.464437 1.564149 4.672813 2.354084638 0.5098872 2.218789 0.799565 2.269  
0.759444508 0 0.9437369 1.178271 2.578631 0.5411734 1.27856 2.058056  
1.094381219 1.059554 0.9879506 0.925413109 0.451942 1.117379 2.47231  
2.199327 2.024503 1.87473683 0.291515919 8.353081 2.315867 6.691 2.339129671  
1.011550745 1.215541291 1.164426 1.705426 4.02525 0.2240705 0.4503069  
4.534618 0.9668358 2.089866872 2.120257713 1.164706 1.1527327 5.488095  
2.612076762 9.242612 1.15598 1.238274 1.091792 1.878128 0.7325033 3.825549  
0.8464945 0.7876084 1.801025111 0.8009999 4.966166 1.951875 3.125113  
8.805364704 1.005291 0.2722596 2.711972 0.747285826 1.015856 4.701957  
1.732987 0.5641174 1.745554 2.866351 0.2834291 0.6155152 1.401963458  
1.652723574 2.653795 1.948708732 4.311265824 0.9930199 3.195181 2.240724565  
1.090972 1.172402 2.973639 5.816087442 0.2851372 0.6919786 2.008986  
1.621976431 0.4539289 0.5086166 2.888406 21.28504 2.155353 0.4582375  
1.552354 2.955063 0.2182291 2.499171 2.0896 1.841050063 0.1236629  
12.96639 0.8928914 2.016409 9.805765 0.9053925 0.8788751 0.536094858  
2.41160737 1.58780474 2.210325 1.811195 1.749621 0.3575313 4.429356  
6.665416513 1.183053 0.5602232 1.068714 1.500688 3.407195 1.256486225  
0.5868953 0.05354639 0.4522753 1.478319 0.4286135 1.687687 0.1333786  
2.243577271 1.809116 1.003149 1.850326666 1.504837 1.016461 1.374207 1.895689  
0.9649779 1.093367719 0.820080035 0.075882183 0.2150724 1.963061  
1.085119 3.032282 3.795021 2.290071 1.347558962 1.214503 0.141160302 0.9404029  
0.603146 0.2595226 7.73939 5.135376 3.043219307 0.8312555 1.617221  
4.345345 1.107876 0.4279021 0.5756988 1.760592 0.769761907 0.6882405  
0.899543311 4.561701 0.2803016 0.784782234 1.517663 2.533489 2.146625

1.425080547 0.9270915 0.9392312 0.7931958 3.213627398 3.072396  
2.224058 1.521705 2.931413 1.354107 3.947033 1.10393  
LINC01612 13.11195 0.041329603 0.03482415 0 0 0.057951885 0.03667273 0  
0 0 0 0 0.8762424 0 0.03356375 0.03081564 0 0 0 0 0  
0 0 0 0 0 0 0 0 0 1.705783 0 0 0 0.078311576 0  
0 0 0 0 0 0.034952031 10.56231 0 0.2534432 0 0.07492471 0  
0 0 0.09695511 0 0 0.159766765 0 0 0.1033817 0 0.1525391  
0 0 0 0 0 0 0 0.08466805 0.03368217 0.1251593 0  
0.213687333 0.0339996 0.6528785 0 0 0.427075532 0 2.448368  
3.253194 0 0 0 0 0.101068905 0.08723676 0 0.03176923 0 0  
0.14601 0 0 0 1.048987 0 0 0 0 0 0 0.0418497 0 0  
0 0 0 0 0.030472112 0.09619591 0 0 0 0 0 0 0 0  
0.02460971 0 4.402354 0 0 0 8.486818 0 0 0.056819385 0  
0.06579632 0 0 0 0.046430068 0 1.439381 0 0 0 0.1518184  
0 0 0 0.0368314 0 0.028441201 0 0 0 0 0 0 0 0 0  
0.05577214 0.1907574 0 0 0 0 0 0 0 0.229399194 0 0  
0.115616 0.1316097 0 0 0.042559032 0 0 0 0 0 0.074663354 0  
0 0.03752362 0 7.74573 0 0 0 0 6.918395882 0 0 1.251455 0  
0 0 0 0 0 0 0 0 0.4559035 0 0 0.416655  
0.02638217 0 0 0 0.20619 0 0 0 1.876658 0 0 0  
0.03553319 5.565376 0 0 0.036241929 0.03803784 0 0 22.21078 0  
0 0.044698 0.1037373 0 0 0 0.02513573 0.2631065 0 0  
0.03930641 0 0.168401889 0 0 0 0.03017138 0 0 0 0 0  
0.04506607 0 0.04789305 0.0234356 0.05832034 0 0 0 0  
0.05696321 0 0.1577285 0 0.03696466 0 0 0 0 0 0 0 0  
0.1655534 0 1.722367 0 0.044410689 2.439366 0 0 0 0 0 0  
0 0.361823017 0.8733639 0 0 0.0695772 0 0.08805816 0  
0.040819545 0 0 0.4933159 0.231054831 0.06495288 0 0 0  
0.06147382 0 0.02386526 0 0 0 0 0 10.20078 0.035338747  
3.015654 0.1451311 0.062213665 0 0.4325065 0.3094774 0 0 0 0  
0 6.463742 0 0 0.077334066 0 0.087558305 0 0 0 0 0  
0.3409252 0 0 0 0 0 0.607836072 0 0.2077475 0 0 0 0  
0 0 0.02973772 0 0.036618587 0 0 0 0 0.039983875 0  
0.08074082 0 0 0.03367255 0 0 0 0 0 0 0 0.03935199  
0 0 0 0 0.1033218 0 9.788527 0 0.040725924 0.048938763 0 0  
0 0.3834042 0.1320882 0 0 0 0.241863087 0 0 0 0  
0.07621647 0 0 0 0 3.628825 0.07173533 0.1931235 0 0.079528036  
0.1827441 0 0 0 0.097995114 0 0 0.02379703 0 0 0  
0.1482646 2.123559 0 0 0 0 0.034269743 0.295090906 0.03363611 0  
0 0 0.04970213 0 0 0 0 0.290261827 0 0.09472287 0 0  
0.08876708 0 0 0.08071039 0 0 0 2.472004 0.07468182 0.06707922  
0 0 5.95296 0 1.901281 0 0 0.1475434 0 0 0.032364479 0  
0.03438236 0 0 0 0 0.165892514 1.195305 0 0 0 0  
0.06179872 0 0 0 4.889301 0 0 0 0 0 0.02395263

0.09938587 0 0.02703075 0 0 0.040092247 0 0 0.02687175 0 0  
0.3996069 0 0.345868678 0 0.966150467 0.04022779 0 5.284384 0 0  
0 0.06321559 0 0 0 0 0 0 0.0672937 0.026768648 0 0  
0.447610336 0 0.03940928 0 0 0 0 0.03619273 0 1.22405 0  
8.910678 0.1020184 0 0.06432114 0  
AL365330.1 0.7442795 1.277637351 0.8612256 4.094947723 1.990713874  
1.074892879 1.133678 1.192606304 0.3607606 0.7118761 1.253876554  
1.541384 1.094179 2.998294 3.023771 3.511068 1.095493 1.612488727 1.156318  
0.7632164 1.034858451 0.9876159 2.781967586 3.785411 1.927989 1.84021553  
1.627525 0.3352515 0.5435213 2.801158 0.5770011 1.033334374 1.680622  
2.541922453 1.750267 3.066441403 1.563442411 3.191869398 1.632481 3.562861  
1.050646469 3.336103 0.463065045 1.056118 1.059783271 2.275818 2.370502  
0.7941173 0.554795506 0.4777927 1.760503 2.483402 3.239284444 2.778062  
1.270010387 3.027184 0.8142039 3.226315 0.324473 2.470022 0.3243878  
2.005565 2.381103599 1.043676 0.7909237 0.8975615 0.9196532 1.695062  
4.819404 0.8475162 1.197309 4.089302157 0.4204169 0.4685264 1.848927303  
0.619194 0.353634224 1.783347 0.8040043 0.4536865 0.3169777 0.6155554  
1.251738 0.398083741 3.9277927 0.8860856 0.1302605 2.188666 2.373381925  
1.228505 0.2321312 1.043966 1.981999758 0.6178847 1.038811 1.233546327  
0.9304184 0.353680296 0.770810695 0.9133035 0.262032422 0.9500901  
0.7023026 1.302053598 2.736082 0.4741437 0.817830468 1.927579 2.670202377  
1.022738201 0.509784 2.182435638 1.495184 2.2095 2.546365 0.6422009  
1.459604 1.671581217 2.147827 2.369252 0.2870502 0.4475778 0.8138326  
1.930123 2.000248 0.8177334 0.9413325 3.124708 2.437619 2.860551057  
2.558079232 0.7845375 2.840707211 1.566562638 0.7885948 2.214478147  
1.494583 0.5687472 0.340008467 3.549938429 0.372388276 1.356423528  
0.6704596 0.703969 1.916217 2.020445 4.261552 2.943462 2.160352886 1.188569  
3.439244 1.534790365 1.915624 1.523197 1.035007993 2.449411 1.293161 0.555887077  
1.625585 1.263633 0.293335912 2.349507 4.242885 0.8098925 1.854855897  
2.704116 2.525521 0.463118523 0.2851698 0.914820213 1.77002 0.6974572  
1.459531478 1.001663 3.683800846 2.66734 4.843009 0.6681928 0.5586839  
0.1522503 1.022156786 0.989571 0.4881878 2.883383 3.264913 0.9837209  
0.3621759 2.314026 1.753898 1.666452917 0.260818218 3.591142 1.338372  
3.582806 1.436641 1.795441388 1.536629 2.622511763 1.678999 1.847386 0.617890257  
1.887874544 0.9537598 0.6112494 2.132854354 1.061589 0.6741787  
1.581802 1.177619 1.468011 1.756776 1.201062 0.3190552 0.1593507 2.268609  
1.706898 0.5626135 0.7980737 1.234097641 1.595 1.46162 0.509069876  
0.8473763 0.681569 1.648703 1.93974 1.582203 3.681183465 1.511843 1.041006  
2.200845 0 1.698709 0.865430366 0.3553113 0.4581242 0.4710167  
2.607770209 0.281571585 2.686305 0.4905926 0.7577354 1.559804965  
1.978867 1.774249 1.130417499 2.468049 1.468383 0.1530622 1.145887 0.7925077  
0.8996311 3.765677007 1.206105 0.344029165 0.8358864 6.071649 2.538061  
0.6416763 2.214965 1.045036 1.646009 0.98391566 1.970537 1.710613 0.2560605  
1.560294 0.2111078 1.338594 1.405469 1.808744 0.5895068 1.902506 4.567138

3.208267412 0.6591562 0.83699148 2.095866 2.726041 1.419845 2.556744385  
1.765136699 1.175205 1.063326 3.775126 0 0.7896557 0.617006798 0.7716133  
2.515446 0.3572897 0.867421282 0.1928473 0.2323538 0.634266925  
0.2458132 0.995691527 0.3370311 2.274521 2.379525799 1.518683 1.015214 0  
2.367289459 0.4015825 1.075937 2.685845 1.674071 2.117547 1.647784 2.866708  
1.216048 1.13872 2.355804407 0.3789335 0.381976179 0.8223166 0.717889008  
3.313188 0.8652519 1.703435931 2.405717 0.6366777 0.624783 0.421225441  
0.4540357 0.4700525 1.012943452 1.356801606 0.6541597 1.211246 1.0077  
1.707611902 1.906660107 2.938727145 0.4458691 0.88981 0.09723089  
0.1915399 0.7680729 0.7412148 0.9058711 0.1499843 2.810616  
0.4422094 0.6964765 0.73208813 1.323166 1.162108 1.143299 1.001256  
3.845244 1.9227 0.6644399 0.7924458 2.626552 0.6806766 2.490408748  
3.566741 0.8787838 2.094529 0.8471988 2.436757411 1.379264 7.808823  
1.596508 0.4818212 3.955541 0.4328324 0.8512506 1.197135873 0.4981832  
0.7714294 1.449433629 0.6244751 2.476752 1.668347 0.6789122 1.919768  
0.802765135 1.292332339 0.7909016 3.759966 1.955326 0.29112797 3.201395064  
0.950941907 1.438442 1.273544 1.264074 2.709101 1.905536 0.4462527 0.616942  
3.414502295 2.456663951 0.662671 2.090549134 5.340626 1.143451487 1.245371  
1.233199 1.096107 4.007204 1.231583 0.9488844 2.185901 0.767584 1.190312  
1.510208955 3.066728 0.4646178 0.8554618 1.619308 2.510040575 1.097814  
0.9052246 1.912681 1.860143182 1.468513 1.218183 1.309531 0.7502442  
1.916061 0.6523354 2.013228 3.125565322 4.267841545 3.431705324 0.5050485  
1.346323386 0.353934566 2.121061 0.4389887 2.056927948 0.9986924  
0.6074917 0.7626282 1.245228703 0.4596562 1.464102 0.5293852  
0.705972114 0.4312141 1.014647 0.3223566 0.6059359 1.377408 1.29273  
0.8341588 0.868386 5.243971 1.333057 1.169634 0.540576282 1.270864 2.355815  
2.099107 1.422119 0.5066478 0.9122128 0.7842961 0.648159885 1.057666288  
0.926760764 0.4858856 2.400364 0.7139344 2.161347 2.475123 2.380994959  
1.396302 3.047994 0.5383822 0.3201866 0.6579651 0.312764434 0.7368711  
3.884382 1.66324 2.064693 1.871316 2.851441 3.910556 1.821299451 0.2878017  
1.374559 0.543300114 0.6769888 1.18505 2.112441 2.554584 1.108362 2.776042106  
3.32863801 1.330296127 0.1300155 3.251583 0.6802716 0.4771016  
1.305909 0.5485331 1.357710065 1.034542 0.640006454 0.142123 1.385532  
0.980541 1.742545 0.6257004 1.609725467 2.065876 0.7169374 0.5837438  
1.222991 1.002367 1.827112 2.46609 1.602825013 2.615203 0.520148601 0.1969742  
0 2.055804307 3.952125 1.42712 1.566162 0.959945298 0.3898749 2.909892  
3.196684 0.744702168 0.8593589 0.3891937 0.2555279 0.3003554  
1.850713 1.789545 0.6179146  
LINC00909 1.132196 3.460244251 1.837519 4.369306527 2.295964064 2.618435607  
2.546373 3.558255128 1.66377 2.11631 1.923322366 1.922492 3.222737 3.439938  
1.884593 2.865789 1.747674 2.436472478 2.048955 1.586867 3.399782288 1.766681  
2.763381485 3.552931 0.8906127 2.846334438 5.070078 2.399044 4.741051 3.37132  
1.97417 2.844679508 2.500584 2.874715322 2.993259 2.797305388 4.420700964  
3.211051156 3.256262 3.754479 2.471748596 3.974191 2.707259917 3.496875

2.255792023 4.113575 1.98594 2.347654 3.176634233 2.734603 2.950083 2.252129  
1.919473088 3.270042 2.593135853 3.809569 2.319313 3.403438 2.815237 4.053088  
2.715859 4.75274 2.831477064 3.197872 1.838915 1.793744 1.617529 3.356863  
2.047438 2.326864 3.058226 2.142583838 1.981508 2.337209 2.15376572 3.237288  
0.950106103 1.904186 2.647684 1.895614 3.523433 1.881363 4.498456 3.205760285  
2.9134962 0.9348344 2.033276 5.005079 3.077999003 4.791998 3.206164  
1.636784 3.982879446 2.768168 3.366527 1.238113171 4.527491 1.656210535  
3.237652106 2.656805 1.775493741 1.919842 2.659312 1.020606416 3.952791  
2.595174 2.221573992 3.445077 4.969748423 2.077641056 2.793118 3.600187705  
3.404161 2.141746 1.702449 3.62376 2.61227 4.625437658 4.928398 4.392234 3.01796  
4.632443 2.00795 1.59354 1.715038 4.087137 1.296064 3.83042 4.539999 3.233117132  
2.442278816 2.412107 1.708680051 2.263008997 2.635526 3.712693141 3.432823  
2.497163 1.075933262 3.016406409 2.153348639 2.259550127 2.521211 2.883928  
3.910235 1.970345 2.783585 3.397174 3.849822795 2.91543 3.1192 3.963795041  
5.527257 2.955068 1.945041167 3.173539 3.361442 1.4346644 3.837591 4.913175  
2.520214569 2.704257 2.157442 3.147488 3.200962376 3.638737 2.838734 2.575315535  
2.620976 2.471903135 2.830501 2.452283 3.181985698 2.676945 3.621850999  
4.381651 2.796215 1.310967 2.346652 1.438875 2.624879805 2.593434 1.119341 3.21214  
4.476636 3.597684 1.115979 4.829515 4.651847 3.117160059 2.204787185 3.986814  
3.19538 1.795661 2.920204 3.057336324 2.230359 2.896929617 3.929034 1.764193  
2.62192416 2.961191475 1.86094 1.233607 3.101002527 0.9661895 3.572984  
1.517363 3.425701 2.258397 3.606127 1.916435 2.069705 0.8786491 2.427188  
4.759776 2.248025 2.717972 3.555380191 2.756833 2.107532 1.785320531 1.955095  
2.259649 4.112417 4.42566 5.116086 3.220524411 2.069067 2.917501 4.251744  
1.049712 3.717268 1.655619324 3.294083 2.392334 3.361586 3.962442303 1.904558626  
3.260626 2.890914 1.738316 2.90148625 3.103652 3.287007 2.368148184 6.226185  
4.187679 2.745402 1.966381 3.827932 1.953755 3.915400222 3.538633 1.964951719  
3.54714 3.713147 3.703622 3.416054 2.426762 2.616557 2.196701 1.147150689  
2.993912 2.284617 2.426416163 1.213801 2.349942 2.83072 2.431011 1.142414  
7.651427 4.314533 2.376327 3.071646493 2.998077 3.349352703 4.509553 3.210711  
3.477926 3.234309477 1.402675171 2.04287 2.799826 3.717854 1.653686 2.519147  
1.786120907 2.685824 4.503852 1.237934 1.820428099 2.591909 1.314155 2.444514223  
2.790526 4.338821619 0.7688891 4.174373 3.519862175 3.915013 2.205515  
1.23658555 3.301330197 2.263144 3.320754 4.547259 2.845007 2.419295 3.398814  
4.310218 2.533502 1.794178 3.732961579 1.730471 2.380782785 1.932978 3.064970509  
3.692064 3.406053 1.83241024 1.73349 2.312865 1.307711 1.401949443 1.898174  
2.548006 1.992388307 3.957640173 1.611815 2.545958 4.200826 2.534612636  
2.840882798 3.517178743 1.771561 2.551635 1.966119 1.319742 3.780028 3.079814  
2.847779 3.877797 2.762295 1.321251 2.280736 2.832605878 2.105087 2.556047  
2.660079 2.411071 3.955967 3.793724 1.764492 2.803223 1.386499 1.767595 4.401383927  
3.405444 2.080551 3.490423 3.085642 2.82639624 2.550901 3.025752 4.844659  
1.777665 2.616596 1.974217 3.118983 1.43054184 1.461 4.230406 1.537176777  
2.254137 5.080164 2.880372 2.272006 3.071539 3.132650423 1.679644298 2.848943  
3.070747 1.566868 1.074108165 4.410153896 2.698824974 3.005324 4.5438

2.914854 2.493982 2.273574 1.542403 2.976556 4.084564153 2.970740564 2.674115  
3.532387427 5.94797 1.761667871 3.840112 3.056567 5.580492 3.177656 3.637296  
2.663064 3.367084 1.978754 2.646234 3.782693031 2.832469 5.122295 2.607843  
1.460771 5.606789661 2.136449 3.006988 3.23908 2.692385757 1.538267 3.810678  
1.387501 2.753487 2.525858 3.68537 3.61054 3.490129095 2.654412336 3.895746717  
1.505023 2.650776546 2.342277771 3.799217 5.63135 2.174889392 2.625779  
1.609155 2.392413 3.695136995 3.342856 3.009552 3.619074 1.458166347 2.753571  
2.779273 3.026681 1.203775 4.120465 1.74925 2.064066 0.6161317 2.929735  
2.190104 2.396668 2.942025271 1.824607 2.340076 3.582939 4.997015 2.430041  
2.078525 2.096631 2.66072429 2.583908365 2.639591135 2.826888 3.890219  
4.281254 3.987114 3.576126 2.547017549 2.725619 3.902279 1.185696 3.218337  
1.457338 2.212765983 5.189474 1.892469 3.077938 3.769456 2.414416 3.199896  
4.931338 2.232545251 2.242108 2.409487 2.879753653 3.065124 3.506486 4.092245  
2.791607 1.949438 3.82203896 3.336549189 1.080560667 2.020226 3.401625  
2.344358 2.800725 3.305567 2.420402 2.196355454 2.334663 1.404661946 1.462154  
5.06014 2.927536 2.936777 0.8673962 1.729499267 4.468609 3.620854 3.198345  
2.979201 0.9314332 2.123562 3.304217 4.23341621 1.973601 1.727836804  
1.225859 1.989733 2.91724235 3.730436 5.517225 2.43832 3.206382267 3.602996  
4.300428 3.892044 1.745939204 2.395637 1.782347 1.066047 1.035696 3.060548  
2.301595 1.806286

AL357060.1 0.2320229 1.13797948 0.5633284 1.022889339 0.363110289  
0.498644219 0.597439 0.830161166 0.2421103 0.3005186 0.352882822  
0.8043686 0.72796 0.6794755 0.2810964 0.8979805 0.3578965  
0.263751825 0.5006564 0.8663623 0.272913769 0.894099 1.019827942  
0.674326 0.2557594 0.55574464 0.7366074 0.4603499 0.1411985  
0.6558266 0.4080504 0.57907313 0.481544 0.860459517 0.5487671  
1.742968939 0.684452243 1.243798423 1.152255 0.877286 1.296474098 1.183476  
0.453119568 0.1404479 0.865277339 0.4652244 0.9414944 0.3438326  
0.457604508 0.2327311 1.472942 0.8824464 0.725923707 0.4495824  
0.508641024 1.748741 0.1762648 0.6088429 0.3552353 0.3091702  
0.1264065 1.536995 0.680431806 0.542262 0.3358643 0.9326911 0.2923527  
0.9260326 0.76898 0.153163 0.3919137 1.936724404 0.1911313 0.4119618  
0.63445662 0.658509 0.140865453 0.5012606 0.3385103 0.2881043  
0.6038704 0.6642494 1.141919 0.426591328 0.620345017 0.2051707  
0.7647771 0.2186854 0.729736013 0.6939588 0.5092349 0.4663426  
0.780644656 1.129352 0.6892553 0.332180525 1.304219 1.148509277 0.688842294  
0.3657794 0.527558183 0.3356737 0.5425412 0.257717067 0.8771479  
0.3651268 0.556442522 0.513433 1.583395022 1.111710314 0.2906193  
1.263856059 0.6344292 1.018638 0.5470152 0.6428016 0.8318806  
1.101912636 0.736049 0.6663162 0.3999731 0.2325477 0.5115031  
0.4428094 0.7428571 0.4425722 0.2412392 0.6514476 1.414932  
1.218989848 1.206682781 0.4831072 1.05739325 0.944168222 0.3355546  
0.926852277 0.4875946 0.1303693 0.441645049 0.93888644 0.728579073  
1.624003546 1.106012 0.6997163 0.434702 0.5025453 0.8112998 0.4503037



1.001724407 0.7351719 0.780809 1.423982534 1.006359 0.9863053 0.388784902  
1.068602 0.7253324 1.137236446 0.7614234 1.504583 0.509182559 0.5500831  
0.5000889 0.3970409 1.029788396 0.7105625 0.669041 0.695548681  
0.287783 0.826845973 0.4465601 0.3724435 0.551511272 0.6180146  
1.425727587 0.798636 1.414575 0.3094364 0.5152383 3.717916 0.642437252  
0.5543189 0.2236103 1.244127 0.9860028 0.2497476 0.3662703  
0.7814933 0.7207331 0.830417414 0.193590262 1.865848 0.7692609  
0.5445926 0.3883478 1.32053717 0.4277066 1.074791381 0.8287388  
0.6161169 0.445309268 0.814482358 0.3716584 0.2867101 0.903791131  
0.5991186 0.5787279 0.3040868 0.5736141 0.4419013 1.011126  
1.203001 0.4262692 0.257252 1.127249 1.974793 0.3846274 0.3668099  
0.749308671 0.6521023 1.218736 0.618734443 0.4361943 0.3675362  
0.8804106 1.319071 0.1718249 0.673578584 1.056071 0.9059655 0.2908883  
0.03185194 0.7606597 0.228989036 0.3538337 0.5712656 0.5758256  
0.985740751 0.585183998 1.133303 0.3689298 1.341028 0.63424725 1.253632  
0.6625766 0.788259251 0.5298488 0.5768472 0.2783426 0.1765336  
0.4315591 0.4877435 1.445164805 0.5546746 0.458039319 0.3748432  
1.134654 1.582439 0.3172634 0.4884328 0.6847443 0.4123364 0.497395985  
0.7590472 0.601235 0.225430954 0.6695358 0.2955406 0.7336598  
0.3725205 0.6172988 1.434457 0.9381445 0.7214046 0.682833799  
0.2478455 0.703048274 0.4178522 0.6054972 0.4215474 0.858604091  
0.69802348 1.272085 0.7212824 0.9136623 0.5121614 0.6192204  
0.181660808 0.527664 4.401343 0.3944783 1.956924391 0.5403512 0.4052875  
0.695341493 0.3951246 0.689774561 0.400735 0.9178428 0.913197529  
0.2484082 1.321825 5.65961732 0.980796106 0.20865 0.5625178 0.7538816  
0.838732 0.6946857 1.540284 0.5284276 0.2046239 0.3060229 1.054003488  
0.2595266 0.522874098 0.3668782 0.231093621 0.8227429 0.3746321  
0.542452027 0.4585808 0.3059884 0.2383915 0.447659754 0.8075144  
0.6797594 0.475126974 1.103120418 0.8806018 0.4719947 0.6075389  
0.829553518 0.716912252 1.652438116 0.302445 0.2745014 0.4672934  
0.5169422 0.8253436 0.3700691 0.4661374 0.459771 0.9059331  
0.315918 0.3862244 0.570555964 0.7701058 0.3416212 0.9582828  
0.6108669 3.943715 1.819564 0.5276975 0.4889301 0.429873 0.5525919  
0.751997805 1.069576 0.414535 1.158013 0.7755529 2.137631081 0.3583117  
2.417662 1.046442 0.6921153 1.089399 0.2208706 0.6435796 0.572890364  
0.2126192 0.6044491 0.478933388 0.461339 1.199105 1.119645 0.2829285  
0.707568 0.364955725 0.492147043 0.8850764 0.7014124 0.5976047  
0.442979245 1.284888944 0.746735126 0.6201586 0.5041481 0.6157261  
1.23162 1.429523 0.2359996 0.3627211 1.148711072 2.101910326 0.4572782  
0.935326411 3.647215 0.509230701 0.703893 0.5766593 0.3611487 1.089999  
0.7948669 0.3615417 1.584258 0.1827894 0.1391512 1.446143806  
1.097195 0.6499263 0.4253136 0.5558873 1.034318292 0.6085862  
0.2405082 0.9828501 0.490140188 0.5271597 0.376242 0.4762747  
0.3853744 0.7322171 1.09359 0.2837585 0.608980621 1.14017314

|             |             |             |             |             |             |             |             |
|-------------|-------------|-------------|-------------|-------------|-------------|-------------|-------------|
| 0.84072275  | 0.3395865   | 0.839410236 | 0.39286359  | 0.6289936   | 0.5588086   |             |             |
| 0.941643913 | 0.3475585   | 0.3287856   | 0.3077923   | 1.441439663 | 0.2201653   |             |             |
| 0.1249726   | 0.542015    | 0.534918939 | 0.1425745   | 0.3115152   | 0.5582889   |             |             |
| 0.509277    | 0.6818105   | 0.2578707   | 0.5620701   | 0.1611382   | 0.826807    | 0.1846976   |             |
| 1.264028    | 0.817818422 | 1.582783    | 0.3560755   | 0.4829942   | 0.4574078   | 0.4639582   |             |
| 0.2979164   | 0.2629009   | 0.252573067 | 0.497548441 | 0.554603942 | 0.228784    |             |             |
| 1.093997    | 0.8208732   | 0.5474479   | 1.429212    | 0.932577267 | 0.5087177   | 0.4267042   |             |
| 0.5678458   | 0.5822571   | 0.3455744   | 0.68193161  | 0.3793108   | 0.5886436   |             |             |
| 0.2900293   | 0.4843393   | 0.3215999   | 1.556277    | 0.3665628   | 1.645943357 |             |             |
| 0.4000007   | 2.016506    | 0.568715514 | 0.2335792   | 0.4788902   | 1.177719    | 0.5768102   |             |
| 0.382651    | 0.759807653 | 1.016516944 | 0.20258761  | 0.2111003   | 1.119089    | 0.552263    |             |
| 0.6164568   | 0.9765052   | 0.4105372   | 0.586384283 | 0.3727937   | 0.6595135   |             |             |
| 0.2861408   | 0.5257019   | 0.3362431   | 0.4433848   | 0.1469178   | 0.980736604 |             |             |
| 0.7252474   | 0.7619293   | 1.242669    | 0.7186395   | 0.2351996   | 0.808045    | 0.7350646   |             |
| 0.809273088 | 0.7025508   | 0.433019546 | 0.1790981   | 0.1760799   | 0.681277238 |             |             |
| 2.016735    | 0.736967    | 0.3778032   | 0.460392251 | 0.2880251   | 0.9818074   | 0.9923874   |             |
| 0.593003872 | 0.489706    | 0.4917456   | 0.1360836   | 0.3706318   | 0.6102297   |             |             |
| 0.4870344   | 0.1669458   |             |             |             |             |             |             |
| AC025627.1  | 0           | 0.929349909 | 0.3579732   | 1.804376794 | 0.523759083 | 1.842989034 |             |
| 0.1884878   | 0.289166186 | 0.3061523   | 0.1812359   | 0.21715866  | 0.0786806   |             |             |
| 0.01941227  | 2.111346    | 1.293813    | 3.979397    | 0.8210058   | 1.976587209 | 0.6470021   |             |
| 0.2413746   | 0.912428123 | 0.3047711   | 1.573907689 | 0.7670458   | 0.9249965   |             |             |
| 1.338567735 | 2.016256    | 0.7315831   | 0.2325623   | 0.3270149   | 0.09326867  |             |             |
| 0.493937875 | 0.1258435   | 0.924493714 | 1.624351    | 7.412709138 | 0.568621863 |             |             |
| 1.98198773  | 0.6945534   | 9.284744    | 0.382118682 | 7.932568    | 0.494020627 | 0           |             |
| 0.286328138 | 0           | 2.155371    | 0.1925462   | 0.544801587 | 0.9267869   | 1.826717    |             |
| 0.04152689  | 1.294641005 | 2.020755    | 0.359256363 | 4.983395    | 1.250305    | 1.948297    |             |
| 0.1011518   | 2.776699    | 0.4382092   | 3.709629    | 1.766648399 | 1.687037    | 0.1548927   |             |
| 0.9249186   | 1.830819    | 1.03353     | 2.358721    | 1.661818    | 1.776675    | 3.325391213 | 0.2184358   |
| 0.4194521   | 0.662415725 | 1.04155     | 0.548762807 | 1.254671    | 0           | 0           | 0.6148498   |
| 0.1033277   | 1.291654    | 0.361956279 | 2.564865753 | 0.448373    | 0.3221539   | 1.469566    |             |
| 1.835656795 | 2.660052    | 0.3377031   | 0.6297278   | 1.581220664 | 6.565146    | 1.041541    |             |
| 0.459581527 | 1.607362    | 0.06431652  | 0.515830741 | 1.273308    | 0.190601666 | 0.2487934   |             |
| 0           | 0           | 2.011391    | 0.3695259   | 0.651543608 | 4.667803    | 4.785371621 | 0.371968483 |
| 0.4532189   | 0.418923005 | 0.9667493   | 0.3169095   | 0           | 1.044185    | 1.538399    |             |
| 2.340614426 | 0.6648184   | 2.466499    | 0.1138907   | 0.04069585  | 0.4010185   |             |             |
| 3.628432    | 0.7582265   | 0.06609078  | 0.2960963   | 5.73001     | 4.709842    | 2.518811107 |             |
| 1.126237262 | 0.4861267   | 0.215884455 | 0.068370802 | 0.5538416   | 2.863653933 |             |             |
| 0.9607419   | 0.365034    | 0.074196368 | 1.151108109 | 0           | 0.150143724 | 0           | 0.9573391   |
| 4.456397    | 0.4065033   | 4.070021    | 3.330548    | 0.657809904 | 0.7616381   | 2.958528    |             |
| 0.031897209 | 2.910699    | 2.645897    | 0.813904842 | 1.08451     | 0.192404    | 0.075815763 |             |
| 2.830703    | 1.930243    | 0.271564032 | 0.9283594   | 0.4572241   | 0.6841319   | 0.89222421  |             |
| 3.97915     | 2.151291    | 0.021054447 | 0.3191257   | 2.495391438 | 0.09903907  | 0.2536642   |             |
| 2.171575633 | 0.4654987   | 3.691267314 | 1.710021    | 2.255332    | 0.6762318   | 0.7721318   |             |

0.04429857 0.479686481 0.449882 1.084009 3.471501 4.452916 0.03252527  
0.2446282 3.26285 2.180425 2.732899773 0.027102637 1.075606 0.8031605  
0.05544943 0.6496 3.086907074 1.5329 3.880995325 3.575076 0.8716433  
0.362461032 1.692021414 0.02477722 0.7904376 0.559533002 0.4526674  
0.9594699 0.02301197 0.6602935 3.864517 10.72973 1.397839 0.03315427  
0.6126737 0.47148 0.05774851 0.08615653 0 0.918555505 10.51787  
0.4115529 0.1586983 0.09131544 0.4206545 1.145962 2.074944 1.867838  
1.909304234 3.665701 0.3786125 2.555805 0 1.170603 0.139891484 0.1148677  
0.3665621 0.382924 1.555871889 0.136542933 5.797437 1.50255 0.94159  
1.652566446 0.3282893 2.419845 0.30293885 2.867417 2.110144 0.2004067  
0.3876816 0.5321243 0.6543892 0.921348146 1.4701 0.187684404  
0.9554623 6.297076 0.8923196 1.174412 0.824314 0.6419101 0.6271586  
0.058029532 1.680495 0.9515197 0.082781203 0.08106812 0.1706214  
1.353666 5.001149 0.1289878 0.9433724 0.640684 7.731114 3.31776893  
0.5804091 0.487060247 6.062656 3.668392 0.0737708 2.92573394 0.370920506  
0.2849471 0.716167 1.830677 0 0.1701906 0.119682414 1.254602 12.26994  
0.3248645 0.464917795 0.04007903 0.1207239 0.221454731 0.2458553  
0.633730378 0.2074393 4.081052 1.704635387 3.314058 1.7055 2.53550856  
1.929782609 0.29211 0.7435017 8.46593 0.3769117 2.251205 0.8561382  
4.446458 0.2211375 0.5141184 0.333201103 0.3006929 0.491577984 0  
0.590302302 0 0.7692445 1.23907463 0.04545226 0.04631176 0.08521227  
0.167126308 0.1270247 0.1139716 0.307005122 1.754548926 0.08651526  
0.3487516 1.134073 0.372633666 5.638840731 1.434456918 0.144144 0.5933082  
0.141451 0.06192249 0.3301374 0.4886116 0.582898 0.3272946 1.514396  
0.9649858 0.4091891 2.698095759 0.5922874 0 4.079707 1.191782  
12.00388 1.66496 1.035668 0.6381825 6.897074 0.3218295 3.623033001  
1.761655 0.5719381 1.367293 0.08803573 0.231194435 0.6019637 2.515851  
2.251126 0.1236972 4.478126 0.9445232 0.650951 0.962455812 1.173412  
0.6516414 0.055490213 0.3690712 0.7643079 0.5814931 0.4526857  
1.780453 1.185032707 0.341832365 0.02212691 5.673647 0.05577644 0.242017929  
4.448051908 0.377297748 0.868222 1.676293 1.19533 0.04926482 0.4808855  
0.3477889 0.5668572 3.203972503 0.388471876 0.1506328 3.773488917  
7.298634 0.51488882 0.416215 0.3887111 3.130882 2.434739 1.749707 0.9049498  
0.06913124 0.2791693 0.5772198 3.729864907 2.661222 0.6499263  
0.4506025 0.4206715 3.022008227 2.851952 0.5088084 1.299546 0.657202055  
1.04877 1.555602 0.5080264 0 3.090461 0.5486487 0.2804201 1.542750907  
2.531970698 2.464615417 0.08644021 0.954829144 0.748948462 2.299725  
0.383183 0.383174132 5.386667 1.233603 0.03962383 0.506168911 0.4806319  
0.2434248 0.6115871 0.02852901 0.3706938 2.594363 0.2735616  
0.07778049 0.568659 0.6716632 0.758456 0 5.709681 4.675927 0.8167568  
0.277562616 0.01812594 0.09346982 0.06543793 1.724076 0.128987 0.4360413  
0.625704 0.168382045 1.01886039 0.650047411 0.5301478 0.9189571  
0.7116525 0.9039909 4.844706 0.452966101 0.02477234 4.335667 0.2193059  
0.3493543 0.04161756 0.260004563 3.096878 4.049868 4.375299 0.9862909

0.4397692 1.179781 2.287352 2.142243096 0.2512154 1.088073 0.139480593  
1.092601 1.564374 1.363934 2.917543 2.100413 3.365475704 5.177336978 1.568266436  
0 2.071702 0.6715518 0.5114309 1.129629 0.3230012 1.456702008  
0.6311484 0 0.05168996 1.644358 0.05705943 1.875239 0 0.334545684  
0.2030693 0.6400206 1.934351 0.4024381 0.1411198 0.4430121  
2.265887 1.8616639 0.3026373 0.808303152 0 0.1232559 1.073610764  
11.39639 0.8102115 0.3580412 2.972087751 0.3013186 7.227577 7.324566  
0.51814239 1.330848 0.7206141 0.2973925 0.04369554 1.708643 0.661186  
1.042769  
MIR222HG 2.315931 1.46159878 0.4867504 0.728209061 0.605677681 0.24886017  
0.5866979 0.507248846 0.1490324 0.0610782 0.478138923 0.6548006  
0.7734238 0.4682808 2.537841 0.4462902 0.1139298 0.096787923  
0.135673 1.069242 0.083707499 0.29672 0.459698917 0.897023 0.2189949  
0.298233853 0.1793984 0.127841 0.1158219 0.3230858 3.636557 0.067549696  
0.5089255 1.138202097 0.2934377 0.232985139 1.148208574 0.371082596  
1.286133 0.4253074 0.300481118 0.3474363 0.041201981 7.704572 0.357939829  
1.045669 0.6866468 1.678125 0.084623745 0.0531405 0.4886889 6.405803  
1.357397391 0.05209939 0.242145607 0.3189656 0.02874807 0.4004233  
0.1458256 3.031173 0 0.2949863 0.31779397 0.3021725 0.2262014  
0.2994826 0.004614342 0.3944791 0.4651162 0.814981 0.1278391  
1.947210367 0.07443288 0.006871634 0.278862569 0.1291261 0.822590029  
0.2787054 0.7506164 5.142052 0.644654 0.3159811 0.4495719 0.366851678  
0.851011067 0.1248723 0.06457367 0.4868506 0.572809037 0.1743122  
0.03934144 0.02427402 0.146282533 0.2145798 0.1659456 0.688370381  
0.7317649 1.770147656 0.111694206 0.07255598 0.124900553 0.2608535  
0.267808 0.496510205 0.4772753 0.232463 0.28216095 0.2419122 0.213974691  
0.569604198 0.0485988 1.670229357 0.1710469 2.711572 2.810303 0.3529291  
0.7383318 0.717099339 1.411516 0.6299378 0.5025229 0.2880127  
0.3003267 0.08602726 3.964161 17.52284 0.4753754 0.7359514 0.4647668  
0.554973394 0.346548067 0.1440432 1.843129455 0.686981311 0.02073888  
0.547324641 0.4108776 0.1211974 1.432687026 0.701310758 0.337255414  
0.865819824 1.930274 1.540632 0.1749583 0.975361 1.32113 0.7794627  
0.790277308 0.4154658 0.3649341 0.744115495 0.4058234 0.1603808  
0.570683188 0.7918952 0.689246 1.020132626 0.3569016 0.1766818  
0.396585175 0.2488706 0.4119737 0.09962424 0.473441038 0.4326116  
0.3738167 0.320088067 0.0334595 0.261635296 0.3180097 0.3546138  
0.145464811 0.2228115 0.222178015 0.861977 0.8159045 0.04431321  
0.1597816 0.6212139 0.641246955 0.2063642 0.04409051 0.4423341  
0.4590954 7.860487 0.004932429 0.420839 0.6566511 0.352394819 0.518599465  
4.571396 0.05103593 25.69668 0.08143452 0.56017068 0.3599472 0.862102239  
0.343407 0.6378228 0.8740712 0.893447885 0.3182339 0.2071883  
0.50665727 1.144648 0.2067846 1.761304 0.9636075 0.1821554 0.9124619  
0.4885325 0.04345174 0.008680708 0.4874687 1.672633 0.07339547  
1.767445 0.410404063 0.6132045 2.939611 0.478374229 0.5684673 6.686562

|             |             |              |             |             |             |
|-------------|-------------|--------------|-------------|-------------|-------------|
| 0.4540593   | 0.1087762   | 0.009890805  | 0.445534977 | 0.4035562   | 0.1042034   |
| 0.2134922   | 0.0935086   | 0.3920691    | 0.171118009 | 0.0752724   | 0.4629439   |
| 0.2060256   | 0.648047178 | 0.071580855  | 0.3259342   | 0.2166154   | 2.353707    |
| 1.293039476 | 0.2051978   | 0.2772065    | 0.918839404 | 0.3463909   | 0.6145642   |
| 0.09338721  | 1.336283    | 0.08136311   | 0.4623785   | 0.509113139 | 0.2858976   |
| 0.057394812 | 0.1897306   | 1.068022     | 0.5000481   | 0.09866512  | 3.506194    |
| 0.1062673   | 0.3287797   | 23.718416325 | 0.7190333   | 0.4796363   | 0.010849242 |
| 0.5152992   | 0.06261222  | 0.3983954    | 0.2607302   | 0.8520143   | 0.7118533   |
| 0.1074785   | 0.5805266   | 0.405344681  | 0.03307303  | 0.212779163 | 0.1765705   |
| 0.2806697   | 0.91527     | 0.445865679  | 1.069476361 | 81.93482    | 2.515456    |
| 0.5598302   | 0.2732369   | 0.062741948  | 0.08221361  | 5.825799    | 0.1419216   |
| 0.478749665 | 0.1313182   | 0.06328795   | 0.382145253 | 0.05858475  | 0.189842801 |
| 0.2768114   | 0.3006778   | 0.336830868  | 0.1555037   | 2.262868    | 0.58152822  |
| 0.428011445 | 0.1312585   | 0.2051427    | 0.2589904   | 1.77072     | 0.2950412   |
| 0.4095476   | 0.1527205   | 1.069703     | 0.2320866   | 0.262014512 | 0.006568098 |
| 0.028011235 | 6.503227    | 0.071413453  | 1.480175    | 0.1405322   | 0.523845763 |
| 0.3395455   | 0.2531381   | 0.365057466  | 0.3662508   | 0.16132     | 0.160943439 |
| 0.325762301 | 0.1876398   | 0.04712681   | 1.172090094 | 0.440065008 | 2.0421835   |
| 0.2739253   | 0.1060344   | 0.4449229    | 0.1988301   | 0.1397875   | 0.3003118   |
| 0.08635863  | 0.09722863  | 1.210701     | 0.07494537  | 0.3217681   | 0.223332881 |
| 0.8344659   | 0.4081597   | 0.5429092    | 0.2892482   | 1.664863    | 0.5062435   |
| 0.2533699   | 0.2482211   | 0.145229     | 0.4282764   | 0.709164635 | 0.419784    |
| 0.09700418  | 0.2038362   | 2.181612114  | 0.1227223   | 2.685393    | 0.2809818   |
| 0.1080778   | 0.7031456   | 0.03536814   | 0.1165253   | 1.603763891 | 0.07237009  |
| 0.02372323  | 1.071482477 | 0.2009223    | 1.803053    | 0.82837     | 0.7281242   |
| 0.4895666   | 1.808811788 | 0.4871893    | 0.3126866   | 5.975939    | 0.015859344 |
| 0.308624998 | 1.961451547 | 0.1342121    | 0.03468847  | 0.5603572   | 0.5036156   |
| 0.5338545   | 0.6016686   | 0.07429187   | 0.46873699  | 1.262638211 | 0.04738038  |
| 0.317398154 | 4.196493    | 0.290687129  | 1.553037    | 0.4780916   | 0.2242803   |
| 0.7011104   | 4.502857    | 0.157045     | 0.4309219   | 0.48416     | 0.52901136  |
| 1.825954    | 0.1574817   | 0.3234463    | 0.874637181 | 0.1644609   | 0.1098325   |
| 0.5049415   | 0.471194926 | 0.06618014   | 0.160004    | 0.2912943   | 0.2925916   |
| 0.4553318   | 0.03886783  | 0.1960088    | 0.610122536 | 0.571338763 | 0.596327332 |
| 0.2718909   | 0.070591337 | 0.036808733  | 1.57949     | 0.2343585   | 0.420878965 |
| 1.358054    | 0.1661782   | 1.138222409  | 0.010955    | 0.6300856   | 0.1128095   |
| 0.239295395 | 0.3512914   | 0.05276098   | 0.1485329   | 0.4213459   | 0.04968534  |
| 0.8450657   | 0.1093429   | 1.054919     | 1.351982    | 2.688516    | 2.488762    |
| 0.08488001  | 0.8576246   | 0.1420295    | 0.1593894   | 0.04969325  | 0.04823782  |
| 0.026481629 | 0.059952727 | 0.044175042  | 0.1505417   | 0.2007297   | 0.08570631  |
| 0.8550903   | 0.5963321   | 0.642543106  | 0.4025839   | 0.4326291   | 0.1970885   |
| 0.3866382   | 0.7417939   | 0.017038001  | 2.169867    | 2.462538    | 0.1390117   |
| 0.2232717   | 0.608509    | 0.5534375    | 1.071323971 | 0.0548735   | 2.528295    |
| 0.371697835 | 0.2928939   | 0.5475821    | 0.377819    | 0.211325    | 0.289850408 |
| 0.594142622 | 0.737482    | 0.9322037    | 0.3242587   | 0.03830157  | 0.2893671   |
| 0.18427     |             |              |             |             |             |
| 1.313749022 |             |              |             |             |             |

0.1018066 0.056945637 0.09484225 0.8828888 10.12544 0.5279447  
0.9130939 0.445760602 0.1916216 0.08077393 0.8594762 0.2109729  
0.2096106 0.6220803 0.2326229 0.187304124 3.98334 0.054094775  
0.1502238 0 0.758810685 1.130293 0.1924616 0.3071429 0.197106293  
0.06039736 0.5209825 0.7496769 0.697593696 0.1532781 0.1888863  
0.1802642 0.3378756 0.1628607 1.056102 0.5089575  
AL354733.3 0.8917614 1.689850897 1.130714 1.929956131 0.922700768 1.184744569  
1.058431 0.791071992 0.9823789 0.04846234 0.284533526 2.540476 1.707782  
1.91086 2.865741 2.779334 0.9039733 0.935105642 0.7266332 1.310231  
1.15281784 1.426173 4.376962336 1.987965 2.345773 1.252762111 1.627329  
0.2608331 0.2176545 1.647975 1.134769 0.763759011 1.278718 0.996326947  
1.725662 3.892553841 1.537385038 2.049263993 2.348498 1.813842 1.844586402  
2.977262 0.126096174 1.780314 1.855203022 2.641441 1.241358 0 0.453225252  
1.138433 1.445246 3.303517 1.938641916 1.302151 0.288194665 2.711597 0.4926977  
2.859433 0.3155589 0.428022 0.9464281 1.950467 1.296785652 1.210485  
0.414182 1.272984 0.6590227 1.493342 3.483427 0.05017069 1.69539 4.539851306  
0.817734 0.1472115 1.540489717 1.870532 0.192594639 1.353365 1.019187  
0.1372693 0.8631545 0.5802247 2.061001 0.993678262 3.524713274  
0.3147234 0.3901804 1.298954 1.636177608 1.361465 0.1755864 0.9013751  
1.218708536 1.983002 1.987778 0.901206266 0.9501003 1.203873314 0.545733972  
0.5699365 0.133787708 0.1552301 0.4529425 0 2.100424 0.8300121  
0.636290079 2.491588 4.636685866 0.989406045 0.462727 1.857168789 1.221451  
1.821939 2.533558 0.3600394 1.33839 0.682776636 1.182184 1.538927 0.4974199  
0.3046972 0.9650884 1.740581 1.534318 1.855626 1.524137 3.110367 3.111479  
1.913210666 3.177403678 0.3164972 1.212274248 2.730157164 1.221799  
3.2384377 0.6625359 0.182205 0.78698883 4.076342644 0.82390906  
2.529344275 0.9128565 0.54175 1.322875 1.229131 3.011864 3.339698 2.291558576  
1.541222 1.140127 3.403186811 3.767394 1.238144 2.247107791 4.132459 0.6802658  
0.709557783 1.60967 0.7455434 0.580928185 3.554383 1.337234 1.422839  
3.91038603 2.24291 2.533701 0.118228815 0.4181365 2.491125812 0.7415233  
0.2110255 0.677457356 0.7197846 3.429057632 0.430878 3.907522 1.028436  
1.217071 0.3731303 0.538724817 0.7157738 0.2448845 3.294093 3.667376  
1.582896 0.1056678 3.68382 4.298399 2.47520699 0.050730576 2.013314  
1.093347 2.387169 1.268784 2.85728085 1.972627 1.354384722 3.782327 0.4078844  
0.352795405 2.799915034 1.484092 0.3236487 0.761695275 0.3488884  
0.558734 1.895242 1.736988 2.569826 2.556878 1.126534 0.248232 0.2169621  
3.088798 7.080115 0.4838021 0.4597188 1.953803958 6.40816 1.540685  
0.693118215 0.5555023 0.5905343 2.145005 1.242838 0.6003592 1.525413483  
2.195661 0.7795533 1.419411 0.05564561 1.156429 0.349130883 0.2150089  
0.6237537 0.4149635 2.273966606 1.022321446 3.325007 0.9843631 1.67649  
2.446911434 2.741572 1.644024 1.13407877 1.353472 2.340597 0.2084001  
0.9070754 0.581016 0.6390691 2.796607679 1.420245 0.292755587 1.761332  
6.933432 2.822128 0.9018498 0.8416073 1.391238 1.173912 0.760335657  
3.793154 2.671574 0.154949431 3.679765 0.3193682 2.711595 1.732584 1.158906

1.123691 0.9593833 4.682942 1.789374725 0.2361754 0.569798046 1.725434  
3.080636 1.56495 2.971675697 0.694287102 5.066944 0.3217242 3.382721 0  
1.035326 0.168015697 0.8033856 4.432193 0.6080796 1.740461488 0.1500394  
0.3163586 0.690863051 0.2928487 0.45189077 0.1058956 4.170423  
1.32537923 1.110456 1.777183 0 2.278437613 0.23433 0.4394788 1.555225  
2.387851 2.328676 2.604087 2.640355 1.618066 0.3207747 0.935526173 0.2345148  
0.520075259 1.606405 0.339976868 3.140033 0.6981178 0.710751245 0.5530025  
0.1733722 0.2658331 0.104275389 0.618187 0.2133315 0.344790367  
2.121017211 0.7287247 1.133796 1.242586 1.255488812 1.912835525 3.474717663  
0.202356 1.110551 0.4633426 0.4636248 0.7605533 0.473059 0.8064397  
0.4084189 3.047236 0.2341442 0.8388626 1.196119375 1.10864 0.458021  
3.436368 0.9914537 5.780806 2.119195 1.137287 1.040412 3.54039 0.6023988  
3.699040686 3.777087 0.2518943 2.632414 0.9337807 2.452241822 0.1877921  
6.31124 4.046438 0.5016609 4.41378 0.4209414 0.8023918 0.986546586  
0.9043942 0.9486859 0.553953581 0.5845447 3.678756 1.467022 1.425063  
1.862359 0.642938592 0.479880051 1.780933 3.485507 2.636152 0.396381928  
3.183409699 0.64737199 0.8750719 1.03213 1.678059 0.6916023 1.853186  
0.3471944 0.6631502 4.277058106 0.945281564 0.225563 2.319258783  
5.839209 0.444815194 1.191517 2.854382 1.237593 4.749896 2.646275 0.4880672  
2.58799 0.05806084 1.350546 1.960570015 2.563884 1.313851 1.084417 1.049881  
1.590912985 1.521407 0.6722717 2.632806 0.723616139 1.890376 0.5160096  
0.4754606 0.232156 4.310176 0.8881798 0.233284 2.178450336 2.349059102  
3.548657306 0.5662942 1.191496196 0.394278157 1.689152 2.21149 2.561512056  
2.078121 0.585879 0.5562577 2.692736638 0.4302647 0.6265068 0.2967911  
0.534004548 0.4269924 1.423344 0.7315016 0.6794159 0.7602949  
1.257216 0.7808207 0.4391552 2.559576 2.823347 2.452452 0.865900469  
1.866042 2.332751 0.4899455 3.642031 0.4828743 0.6032634 0.4478078  
0.315176647 0.583805404 0.630910213 0.248082 2.178792 0.2880146 0.9563962  
3.155522 1.745593346 0.4173186 2.766641 0.469138 0.9445504 0.856895  
0.425840806 1.523497 3.085096 1.768223 1.342643 2.351879 5.663239 1.482042  
1.53007039 0.8620768 1.155936 0.522158119 0.4608732 2.569635 1.938991  
2.275434 1.310514 1.529873754 4.242787696 1.249137478 0 3.199185 0.7277411  
0.5128359 2.210544 0.604592 2.218289368 1.090505 0.290464467 0.1451295  
1.787168 2.349678 1.300023 0.5242554 2.922270847 0.4561248 0.7986582  
1.059719 0.5550496 0.3081718 1.658455 1.555135 1.724727213 1.375725  
0.8691574 0.07662512 0 2.332547195 3.795506 1.706119 0.3655526  
2.010772992 0.6303602 2.705708 4.874697 1.58703753 0.4151791 0.7225939  
0.06958221 0.3680509 1.308367 1.547006 0.9422722  
AC005674.2 0.6935922 2.518209179 0.1535537 1.715516561 0.480573317  
0.449118856 0.4851144 0.874342728 0.04548051 0.09692467 0.239369474  
0.5890958 0.8034245 2.398226 0.4978049 0.9511498 0.2963023  
0.334288974 0.2287549 0.4166634 0.422225464 0.9145615 2.534523062  
1.133058 0.4592253 0.751657267 0.542443 0.1159258 0.07738825 1.323611  
0.2958158 1.241666696 0.8001332 0.84483864 0.5706553 1.088240859

0.862862827 0.906858204 3.466831 1.199854 1.091693993 1.285058 0.079393887  
0.981455 0.435171079 0.7675982 1.06205 0.3103505 0.159468144 0.1144456  
1.25333 1.33868 2.148661456 0.3720431 0.234825282 1.25336 0.3467132  
1.026817 0.08765525 0.428022 0.07711637 1.365327 0.857319404 0.5204502  
0.08743841 0.6053745 0.09519217 0.5958283 1.129638 0.1616611  
1.050562 3.251815226 0.0954023 0.2998754 0.667963021 0.3834736  
0.064198213 0.7253327 0.4781373 1.044772 0.1598434 0.07879595  
0.7178271 0.255947431 1.424740423 0.09325137 0.4295925 1.027277  
0.781729301 0.8212009 0.1638806 0.2272698 1.40731819 0.8512889  
0.7772722 0.555288709 0.9031818 3.210328838 0.312514326 0.2245205  
0.059461204 0.132233 0.2963698 0.206357212 2.67727 0.07172944 0.271012441  
0.4909352 1.358221112 0.484523948 0.1756649 0.976733215 0.3970971  
1.374693 2.089074 0.1600175 0.6624355 0.745996695 1.299711 2.508977  
0.1934411 0.1735081 0.3971557 0.3602511 0.5497974 1.051521  
0.3502435 1.044734 1.694028 2.482618603 2.481497958 0.3340804 2.790155016  
1.270281458 0.5347942 1.104294848 0.4732399 0.1062862 0.133736664  
2.678739452 0.207737754 0.798505512 0.4107854 0.6019445 0.3388846  
0.5592873 2.19492 2.08793 1.364294409 0.6207699 1.298478 1.399751301  
2.157397 0.6947364 0.308924423 1.159989 0.6891582 0.341638932 0.6259827  
0.5798671 0.415525021 0.7196529 0.7191347 0.4189469 0.74677511  
0.4184884 0.8596485 0.083198055 0.03982253 0.657380423 0.4222563  
0.293091 0.466692845 0.2357189 1.626385543 0.92331 3.833868 0.1362458  
0.3338495 0.2671797 0.852980961 0.3134434 0.2060139 3.289079  
1.994213 0.5749837 0.01565449 1.696496 1.765672 1.645554277 0.050730576  
2.077229 0.5466734 2.185355 0.540408 1.033559616 0.9298577 1.220998348  
1.06681 0.8988563 0.177905375 1.841109886 0.2937266 0.164393 1.62389201  
0.6534736 0.4966525 0.7418246 0.9056093 0.7790556 2.222376  
0.4885687 0.07584866 0.09298374 0.9151995 1.59738 0.1164709  
0.3807772 0.690344065 0.4746785 0.9486627 0.291549726 0.1994111  
0.4967987 1.496515 0.7767739 0.235435 1.980616236 1.438361 0.2204797  
0.5140255 0.06182845 0.4463411 0.160018321 0.2209813 0.3326686  
0.08802257 1.298776249 0.085193454 0.8463653 0.3828079 0.6065931  
1.928802305 1.045159 0.6710301 0.670546574 0.6689574 0.3955175  
0.1481957 0.02015723 0.1567821 0.2011884 2.501410202 0.5030034  
0.208181751 0.5208726 1.831137 1.894218 0.1910168 1.628666 0.7764234  
0.9604737 0.502867498 1.048514 1.194978 0.043041509 0.3877874 0.1561356  
0.8890474 0.4367376 0.5955489 0.5410363 0.4157328 1.833939  
1.31571671 0.08922181 0.557135867 0.5087819 0.9732665 0.7978175  
0.839616308 0.629012246 2.444578 0.6315328 1.269131 0.07953337 0.4645695  
0.118233268 0.3330274 4.577695 0.2657533 0.621593389 0.3584276  
0.1255391 0.337755269 0.09296783 0.332641817 0.1804147 0.6881885  
0.518152374 0.6637208 0.8154562 0.065916 0.864447875 0.09546778  
0.8586113 0.7846181 1.145686 1.026753 1.482326 0.9183843 0.668968  
0.3207747 1.470112558 0.06253728 0.102237017 1.022258 0.118047524



1.538076 0.1696814 0.731533445 0.4631987 0.1252133 0.1535925  
0.34758463 0.2060623 0.2559978 0.174523519 0.638585827 0.2474065  
0.3970194 0.2559958 1.028157505 0.93744122 2.374975372 0.1423987  
0.2299626 0.2721218 0.1448827 0.1795751 0.2382816 0.1844797  
0.2632033 1.456689 0.2304276 0.3566179 0.42824027 1.801541 0.4395151  
1.834035 0.1973727 6.217094 1.205033 0.3159132 0.3596485 0.2781451  
0.334666 0.812223219 0.7194452 0.1329442 1.974311 0.2807445 1.501263512  
0.3825395 2.853544 1.226193 0.1929465 2.735554 0.06080264 0.416055  
0.276423681 0.2548095 0.1430558 0.330833389 0.1358033 0.6017719  
1.335568 0.1797377 0.5372889 0.246459794 0.439890046 0.3819571  
0.8290181 1.102022 0.119543756 1.208063168 0.817388877 0.4213309  
0.2477113 0.9561589 0.6198805 3.000397 0.3713051 0.1964889  
1.451513681 1.325010055 0.1441097 0.995641397 3.745908 0.197695642  
0.4837357 0.9701166 0.392309 2.046877 1.129543 0.4051277 1.226899  
0.2128898 0.1980801 0.945749221 1.180201 0.3730688 0.2722199  
0.355793 0.87729358 0.2639478 0.07469685 1.535804 0.410049145 0.3312198  
0.1351454 0.2509375 0.2631101 1.877825 0.6784707 0.648011 0.956942008  
1.831625031 1.301174346 0.1438207 0.458267768 0.102220263 0.8173318  
0.5312889 1.108091141 0.6271421 0.3446347 0.07004726 1.396233812  
0.008692217 0.03797011 0.1413291 0.207668435 0.1423308 0.3953733  
0.158492 0.1779423 0.1070045 0.3212885 0.25633 0.454169 3.707144  
0.6453365 1.114751 0.211664559 0.260115 0.4211912 0.5307743 0.983502  
0.09964073 0.2641741 0.1301322 0.024513739 0.181628348 0.155223941  
0.2848349 2.185163 0.1320067 1.038139 1.953905 1.169270463 0.3194291  
1.019558 0.1922163 0.3552156 0.3418924 0.050695334 0.4459015  
1.562136 0.2171501 0.9929965 1.506945 2.239967 1.341766 0.943836524  
0.1741569 1.730846 0.290087844 0.1152183 0.4714317 0.9551325  
0.8776676 0.419188 0.779935639 1.210694469 0.367801591 0.1721038  
0.7935128 0.7681711 0.5850128 0.8329585 0.1738696 0.811318797  
0.3332099 0.109731021 0.1773805 2.096061 0.8247607 0.5813992  
0.05460994 1.066860785 1.005164 0.2711494 0.4268315 0.7973332  
0.5576442 1.099056 1.150642 0.895606648 5.179199 0.447097428 0.04256951  
0.06408605 0.865235455 1.201109 1.005767 0.2437017 0.305339602 0.1363937  
0.9233767 1.194494 0.538809038 0.2809798 0.4067936 0.1005076  
0.06361373 0.4522749 0.9410952 0.2355681  
AP003392.1 0.7254377 3.59504327 0.6245709 3.318073081 0.645052521  
1.585033928 0.5919526 0.807232565 0.5494184 0.2168296 0.454662968  
1.45514 1.110916 5.084389 2.528255 1.464597 0.7752046 1.000482968 1.234211  
1.044418 1.146205118 1.70159 1.569178658 2.251084 2.623857 1.401273107  
2.556087 0.583508 0.5193743 1.755559 1.920211 1.169042423 1.831795 0.82116511  
1.623847 4.751950404 1.528566386 2.028726765 2.157815 4.026279 1.235146629  
5.351102 0.344775389 1.63394 1.567877124 2.007596 2.175343 0.0671887  
0.619610048 0.6872267 2.970293 2.898148 2.782859308 2.589363 0.823806929  
3.882302 0.7041904 1.792345 0.2353116 1.41349 0.5175496 2.065332

0.72525775 1.216624 0.4323965 1.898523 0.4914318 2.834572 5.980484  
0.5237705 1.944998 7.06879694 0.3353804 0.07318356 0.95261361  
1.198394 0.095744945 2.285544 0.8725994 0.2559035 0.5900148 0.5288217  
2.659991 0.067362163 2.990905244 0.4693771 0.1058024 4.757669 1.098084781  
1.334317 0.3666163 0.3619288 3.667610296 3.741612 1.966874 0.305467099  
1.653138 0.718180639 0.939121558 0.5022733 0.232785496 0.2700944  
0.7505739 0.062950966 2.984801 0.2750837 0.830340303 3.319577 5.225640881  
1.147685788 0.4888273 1.938841603 1.855401 0.7898933 0.4474584  
0.3835437 1.119009 3.394300675 0.4639746 2.648249 0.1059786 0.6532346  
1.38602 1.883297 1.029724 2.998095 1.601496 3.199164 0.8507487 3.566692925  
4.829896604 0.4130197 0.559613078 1.526904341 1.049137 3.663980414  
0.882235 0.3736422 0.621376851 0.955340614 1.181513948 2.604651165  
1.633716 0.8390392 3.34302 0.9602065 1.882627 3.420157 1.861838208  
1.120554 5.313688 1.246613665 1.123735 2.192793 0.937235547 2.892347 1.611337  
0.423292597 2.500682 1.967208 0.893468659 2.385446 1.67525 1.114058 4.191702043  
2.05122 1.923114 0.382039575 0.2449885 2.825141486 0.3801548 0.5114242  
1.077714187 0.8474871 6.6788386 1.377021 5.723597 0.23597 0.8508447  
0.2164108 1.037792072 1.695444 0.2869583 6.124171 4.640796 0.9533697  
0.1050617 2.530147 1.715972 3.260836742 0.075659368 0.6434247 1.188988  
1.625315 1.182662 3.645810237 0.6240536 2.433089884 2.665502 1.368713  
0.627341733 1.950979883 0.6916778 0.7240325 2.023480636 0.3344983  
0.5654492 3.147756 2.889445 2.247528 4.551378 1.490419 0.4627652 0.1386756  
4.277576 3.989947 0.3908344 0.841446 3.059589755 5.999736 0.8616644  
0.553775138 0.1593219 2.516344 2.083103 1.969411 1.158718 2.112495591  
3.069937 0.660581 1.411269 0 1.860853 0.227802894 0.2004146 0.1860527  
0.5626135 2.141926883 0.667050083 4.508092 1.179703 1.442486 3.821450846  
5.146209 1.301003 0.604057253 1.948957 2.108998 0.2486457 1.83982 0.587999  
1.270807 6.325787542 1.390034 0.174645781 1.070944 3.857799 3.221105 0.2521903  
0.7321823 1.721213 0.7162232 0.863970591 3.380458 1.532452 0.057772732  
2.178221 0.3334131 1.922586 2.410418 0.2160484 2.713309 0.8942626 5.15222  
3.414322597 0.3170079 1.076406251 3.760985 3.902513 1.16698 3.64052595  
1.075282127 7.357955 1.39947 4.357025 0.0889618 0.8314285 0.793496696  
0.6221246 11.41754 0.7859691 1.761379353 0.6713046 0.2696091  
0.283346318 0.18718 1.01092199 0.2105763 4.864953 2.70876316 1.142158  
3.681226 14.59856626 2.817897006 0.1747394 0.3550283 2.758272 3.965916  
2.480698 3.256353 2.931959 1.290769 0.1594674 1.727439751 0.1399017  
0.507147958 0.7985952 0.28521004 2.93514 0.2602925 0.502110671  
0.5075357 0.3555291 0.07929248 0.155515876 0.7092012 0.4772426  
0.171406301 2.346946818 0.8151127 0.5636461 1.428499 1.421660372  
2.929209003 3.179973665 0.2514941 0.6022805 0 0.432155 0.4608037  
0.7995873 0.4598638 0.3654685 3.593432 0.7732324 1.033498 0.495524279  
2.118447 0 3.416657 0.9241562 16.02292 4.369008 1.310658 0.9195055  
3.520082 1.589504 4.433089596 5.275473 0.4695927 2.535523 0.9420777  
1.183232192 0 6.118162 3.915165 0.6330711 5.676818 0.2197266 0.6426635

1.439345963 0.6744048 0.6316367 0.722893536 0.3170136 1.524023  
3.070133 0.6605764 2.119682 0.671213138 0.715691089 1.605999 5.320105  
1.926847 0.29558117 2.921676205 0.702172992 0.4350262 0.5541533  
2.181797 0.137527 4.224718 0.970883 0.527477 4.714755215 1.409788948 0.4625551  
1.415017961 13.5558 1.160942141 1.982065 1.54421 1.24859 6.701057 3.204205  
2.033842 3.409417 0.1298875 1.127952 1.889893309 3.496015 0.4717247  
0.6888478 1.017762 6.942288658 1.73162 0.4177597 3.179657 0.539599033  
1.545193 0.7420898 0.7090999 0.2769892 4.79294 1.138352 0.08697969  
1.473352733 1.044866784 2.161084803 0.2714685 1.264398449 0.555356741  
1.178333 0.5348444 2.317605172 1.626176 0.6681828 0.3041868 3.011952071  
0.9042066 0.3397708 0.347783 0.11946182 0.6368147 0.811647 0.4636573  
0.9409011 0.7559338 1.593755 1.429175 0.9572408 1.774728 3.428736  
3.752578 0.871695214 0.7843021 1.91348 1.644081 1.753273 0.7201567  
0.9261663 0.5394243 0.305534532 0.609479447 0.806517289 0.4933179  
3.548732 0.2953113 0.2194408 5.437182 4.314156949 1.106466 5.295234  
0.437294 0.2709036 0.08713429 0.453640848 2.050465 1.24887 1.85061  
1.689535 1.432263 6.321318 2.005652 3.580286024 0.9058325 2.339657 0.421819895  
0.5155082 1.515112 2.482131 4.387406 1.302997 3.623792741 2.588594614  
0.279443757 0.1980064 5.397779 1.899362 0.6373678 1.36172 0.5569237  
1.99879324 1.626375 0 0.2164455 1.554802 1.911436 2.859802 0.07330053  
2.879566261 0.2267542 0.5293847 0.4938941 1.478212 0.131316 0.9275301  
3.821609 1.889816995 3.319007 0.840167021 0.1714176 0.1720398 3.719587688  
7.523584 1.767012 0.6814795 3.398706166 0.4453184 2.630139 5.420121  
1.117703296 0.5910511 0.7543714 0.2334929 0.2439598 1.662212  
2.451398 0.7779344  
MCF2L-AS1 5.839375 0.462810288 0.09175578 0.176189815 0.252705969 0.362646946  
0.2898794 0.114029449 0.04484173 0.3716353 0.222648626 0.02016743  
0.8160241 0.04757632 0.08843481 0.4262686 0.2475769 0.13361915  
0.1326718 0.4207105 0.046774756 0.4017549 0.645478996 0.342806  
0.1835577 0.20586119 0.189654 0.07143602 4.172729 0.2321184 5.139929  
0.220184812 0.2580499 0.459571271 0.06751685 0.240727437 0.129554919  
0.25159261 0.09188547 0.3465827 0.185579519 0.1881696 0.115115889  
17.90941 0.383895007 1.391208 0.1699893 0.296121 0.331007207 0 0.3089317  
0.04257673 0.106189655 0.1358584 0.710367467 0.1188228 0.06746914  
0.1134973 0.2419876 0.1674645 0 0.3632472 0.035515899 0.02882812  
0.1134347 0.08367365 0.09024539 0.2416765 0.3993607 0 0.3214573  
0.359713679 0.2463539 0.107514 0.308710087 0.1298775 0.017582376  
0.02180322 0.6616448 9.323513 0.1181988 0.2118798 0.06512993  
0.44532823 0.066574883 0.373513 0.5828792 0.1674131 0.156838654  
0.2982984 0.01923559 0.1139379 0.23841108 0.164575 0.2093867  
0.112190514 0.1156489 0.131884998 0.045988818 0.1702824 0.170992717  
0.08502772 0.1102669 1.156016687 0.1302468 0.1262893 0.203308979  
0.05459098 0.230887064 0.36129996 0.2323383 0.497331717 0.2973569  
0.3017126 0.1826004 0.1690393 0.2221536 0.311660683 0.1363251

0.2917909 0.1946165 1.293465 0.2545255 0.03738856 0.2731389  
5.759738 0.03794774 0.2741606 0.2272429 0.374273756 0.133879368  
0.2383731 0.284582839 0.186931407 0.3244818 0.336422359 0.2851403  
1.771509 0.278931104 0.159487724 0.104145808 0.263896273 4.200166 0.1826124  
0.1207681 0.2885401 0.2183502 0.2195195 0.412157735 0.1055261  
0.2899499 0.261628791 0.09524312 0.2882337 0.083448109 0.2978377  
0.2411055 0.285018997 0.404113 0.1570667 0.318205045 0.1297949  
0.2050926 0.09742047 0.044623436 0.2086234 0.2478289 0.172693775  
0.3762725 0.142137621 0.02538572 0.1733847 0.222647502 0.2282581  
0.336407633 0.3371638 0.2484342 0.1949984 0.3124942 0.04541848 0  
0.1383766 0.1149739 0.5932105 0.3348026 6.90294 0.1736395  
0.3451539 0.2853891 0.610110712 2.056298365 1.102799 0.1497209  
0.5400868 0.1447875 0.226067633 0.09822835 0.387794655 0.2049013  
0.2978931 0.133784774 0.201135911 0.2032289 0.3798846 0.208610363  
0.08190198 0.1530241 0.02359373 0.2927508 0.05213442 0.2710716  
0.3981048 0.6118639 0.03395474 0.1879887 0.2960422 0.1104183  
0.7554367 0.064212096 0.03900097 0.2461418 0.162710335 0.163842  
1.863785 0.1912681 0.2269227 0.1354082 0.501329712 0.4510048  
0.1552736 0.143979 4.602486 0.0333388 0.239046777 0 0 0.2479609  
0.480746932 0.419984583 0.463599 0.3273639 0.2590082 0.075866186  
0.2071315 0.3308028 0.465896124 0.4601595 0.2136781 0.1598125 0  
0.2727884 0.145855 0.1787158 0.0972429 0.064143078 0.1187415  
0.2337112 0.3154753 0.2624326 0.3073285 0.05195827 0.1753674  
0.138825331 0.5320966 0.6003538 0.318277448 0.1870146 0.1399479  
0.04869782 0.1699751 0.211598 0.2930975 0.3678534 0.1261522  
0.374757512 0.1293657 0.166457856 0.1454018 0.1423131 1.008477  
0.186027853 0.11701468 8.326298 0.2055962 0.1443814 0 0.08724661  
0.061354047 0.1523273 1.655282 0.04441031 0.612863144 0.472561 0  
0.094605544 0.2062397 0.216583884 0.1353441 0.2261743 0.322657865  
0.3355892 0.1622428 0 0.334834796 0.2139249 0.3811491 0.18419  
0.1783571 0.1214799 0.6802811 0.4087262 0.02061164 0.08785263  
0.292821194 0.1027649 0.06573985 10.93225 0.046555821 1.647287 0.3345965  
0.143432207 0 0.498567 0.02912217 0.257027117 0.4948969 0.3271883  
0.16787546 0.112431594 3.015883 0.1317357 0.08507876 0.229232508  
0.149680147 0.201863705 0.03694702 0.3041538 0.07251348 0.06348795  
0.130186 0.08637313 0.2338568 0.3131976 0 0.05496564 0.2597114  
0.691576511 0.1328383 0.3877272 0.3700209 0.4978156 1.732587  
0.06828207 0.1132641 0.06332093 0.07835388 0.1522918 0.048241903  
0.4925977 0.1379758 0.1201594 0.2106098 0.447740782 0.03428788  
0.3457 0.219813 0.1479618 0.6432308 0.2305718 0.2441735 0.234949419  
0.1415384 0.3526165 0.094821759 0.1164313 0.3358415 0.4406649  
0.02109682 0.1431737 0.334562849 0.284760283 0.1361178 0 3.288225  
0.18610227 0.42922378 0.096709044 0.2282491 0.1130704 0.1178412  
1.136481 0.3190276 0.09508835 0.1695131 0.407438364 0.438122073

0.154441 0.577445688 1.689744 0 0.2510219 0.2452542 0.07975237  
0.4219085 0.2152729 1.289523 0.4961526 0.127212 0 0.104771486  
0.4413749 0.05330857 0.3519955 0.1725226 0.032275076 0.0731013  
0.03068656 0.2821553 0.13872697 0.2588647 0.02018898 0.09766308  
0.839283 0.2278072 0.212845 0.3194549 0.138750266 0.248311245 0.09718935  
0.2215637 0.602441897 0.095985319 0.1790783 0.03273919 0.299322757  
0.04215913 0.03775493 0.2234406 0.245825676 0.192828 0.1247894  
0.2322402 0.643505481 0.05847158 0.1375836 0.1402387 0.07974685  
0.05552716 0.06886435 0.1360853 0.1110224 0.1475805 0.02209281  
0.3838107 0.260864678 14.57 0.06388855 0.9392916 0.2272708  
0.09446277 0.2526888 0.1320781 0.103583336 0.06395621 0.296213864  
0.0679438 0.4710946 0.2169211 0.7656542 0.4195258 0.327824111  
1.904895 0.5809168 0.3212146 0.1193954 0.1493439 0.283238819  
0.0814146 0.168987 0.06796834 0.06894718 10.15569 0.2731369 0.9320581  
0.289000122 0.1073193 0.5125639 0.619696082 0.07888893 0.1309325  
0.1947161 0.1068322 0.130516 0.073940528 0.607408798 0.273687425  
3.611902 0.1593057 0.2717879 0.1310901 0.5264485 0.1168825  
0.253140465 0.3484408 0 0.3709771 0.1903468 14.918 0.2136274  
0.1794765 0.314419691 0.1249218 0.7291121 0.4111622 0.2171643  
0.1205728 0.3568807 0.1161585 0.173520767 0.2659613 0.052898156  
0.06295744 0 0.157250373 0.3684302 0.0519184 0.5005811 0.165210983  
0.03634543 0.2381881 0.2384044 0.289768088 0.144719 0.2110948  
1.067188 0.0672003 0.07962905 0.2330286 0.03686659  
LINC00173 0.08420991 1.727157105 0.5615542 4.313194937 0.675269509  
0.74365038 0.3581496 0.747017135 0.7730585 0.1006796 0.729295547  
0.3268198 1.509739 1.952081 0.9376232 1.889678 1.527999 0.245712568  
1.105491 0.3071828 1.040234339 0.4925253 5.150614274 7.891423 4.69398  
1.798153461 0.9154826 0.3694609 0.3535172 1.289422 0.04121436  
0.857878415 2.859882 1.614285817 0.8613385 4.488005431 5.620947717  
1.848392662 2.241471 5.616486 1.087774578 3.799073 0.254024253 0 2.001043841  
5.804135 1.734895 3.488444 0.970099571 0.3890598 3.375284 0.4624266  
1.574383774 4.344707 0.417289127 4.752451 0.2016124 10.76946 0.429099  
1.177912 0.8460563 4.788799 5.400342963 0.4671691 0.2816036 1.711778  
0.2800448 9.025136 8.277135 0.01895067 0.7389107 4.254671739 0.4633166  
0.009267555 0.98635738 0.5771773 0.303115049 3.345342 0.2994223  
0.1296247 0.6113141 0.474857 2.6798 0.733611466 8.837533574 0.217944  
0.04019468 2.4388 1.521882876 0.5362975 0.2188665 0.1374979  
5.8363956 0.4539561 1.516102 1.903185762 0.5881573 2.11450291  
0.697693795 0.5186259 0.218984239 0.3420324 1.805921 0.813119185 2.55229  
1.61983 0.290413268 5.979329 6.338828251 0.782048684 0.09467417 2.657894831  
1.401201 3.288909 7.076656 1.59309 2.665585 2.5897569 6.474816 4.180814  
0.7381291 0.1438643 0.4590466 1.559854 2.564504 0.02336381 4.108426  
4.172779 3.094905 5.716800534 1.298273294 0.7023479 2.540282738 0.805660785  
0.3775932 7.065239802 0.4647606 0.172058 0.489612193 4.839158753

0.478784926 2.615959662 0.05172117 1.298626 2.755189 4.554291 7.118697 3.93583  
1.73115321 1.237082 7.936322 0.281900271 3.885981 0.6898231 0.417200133  
4.484248 0.6877264 0.357355978 3.521396 7.159383 0.966865644 1.715513  
3.606452 1.182368 2.100175548 4.315928 2.255879 0.171188454 0.6430422  
1.813304352 1.234152 0.398547 0.87856213 1.380864 6.853158366 6.103236 3.02441  
0.5976383 1.946614 0.1879203 0.500244473 1.097364 0.1651763 7.653038  
3.46314 0.02299607 0.006652211 3.808226 5.543228 1.877681235 0.057486464  
3.394987 1.505668 2.07781 0.2795626 2.602224142 0.9144512 2.110282249  
4.168279 0.539237 0.353649631 2.522624199 1.077359 0.3318211 0.422574891  
0.7059832 0.6256043 0.447424 1.722268 1.456027 1.401959 0.487288 0.5508586  
0.1053666 3.259389 4.49124 0.6852887 0.1183955 2.686314866 2.17174  
1.115411 0.074802104 0.387372 0.3558321 1.695809 5.28131 0.6469616  
4.09091519 3.153272 0.4550683 3.46509 0 1.092027 0.692344293 0.771533  
7.02108 0.2137387 2.817898723 0.410290023 1.958116 0.4315739 1.307094  
2.493750298 2.910273 1.780586 0.130040509 2.644339 5.083572 0.448691 0.781183  
0.5094693 0.7141171 4.850387604 1.139979 0.530787854 3.234369 7.715751  
2.686719 0.3779089 3.245181 1.295845 1.098459 0.547041911 5.364133 6.93445  
0.2560605 2.242525 0.3498358 2.065259 1.518883 1.541233 0.2526458  
0.8968956 0.7539402 3.379448634 0.7582774 0.566762802 4.36163  
6.070504 0.2607878 6.486291243 2.26946147 0.4784765 0.9215491  
2.165512 1.216687 0.609163 0.465399413 1.464768 4.451705 0.4440601 0.692632633  
0.1062628 0.3328824 1.141680465 0.1817262 1.184161709 0.5266574  
3.283109 5.404922886 2.986744 1.193395 19.94334034 2.833750436 0.2212802  
0.4080874 4.334398 3.044076 0.4188555 1.899155 8.347179 6.005223 0.7572769  
1.144247855 0.2834619 0.408000929 0.06435521 0.714321858 1.595342  
0.4037842 1.229299847 1.671058 0.2455757 0.07028808 0.12800877  
0.01796185 0.4431924 0.137470897 0.904534404 0.01529204 0.3244408  
1.730745 0.851854395 7.81874002 2.177530527 0.3184779 0.800829 0.02500223  
0.3009913 1.418441 1.054246 0.9586306 0.2005505 0.347981 0.06949005  
0.3099703 0.966356331 0.8048045 0.01572777 3.788603 0.7645957  
10.62935 0.4708652 1.244808 0.6404256 2.897462 0.9976774 5.347679193  
6.884376 0.9990385 1.843646 0.1763557 1.743568036 0.1182226 7.005018  
3.372666 0.3498265 2.58491 0.9539978 0.3086953 4.342092819 0.07320243  
0.6270975 0.372711505 0.3010862 6.523186 0.8043814 1.054739 5.325299  
1.444977243 0.37762958 0.5866578 5.163382 0.2809755 0.053472484  
1.137702837 2.61200277 0.2754464 1.029231 1.990917 0.9404451 1.159988  
0.4508063 1.093796 5.320770148 4.627988673 0.8733057 2.239874073  
5.326755 2.506258974 0.8481988 2.758843 0.7630738 7.673626 3.864641  
0.5639085 6.753213 0.3399301 0.6427685 0.821834641 9.615231 1.038497  
0.7964644 1.417721 1.63585403 1.426598 0.4655441 1.426854 1.339303091  
1.991074 1.754183 0.628575 0.298149 1.877978 0.4508104 3.778014 3.750678387  
3.712632979 6.04302829 0.4201664 1.090521942 0.397142163 1.070249  
0.5531258 2.863931736 0.7849561 0.07159724 0.490261 2.184905488  
0.6353105 0.29043 0.3122928 0.151279739 0.4435345 0.8776037

0.2417675 1.530625 0.8711176 2.706819 0.4222929 0.03827987 1.24668  
0.5560754 3.964056 0.310717795 0 0.1431846 1.349426 4.135754 0.7816851  
0.8377464 0.1951705 0.351196836 0.588046121 0.902173234 0.4529148  
2.154914 0.4827557 1.834058 4.160135 1.394059466 0.3940781 29.91388  
0.4153234 0.4665576 0.2059717 0.350423825 0.350891 1.648088 3.210607  
3.122133 0.1406572 1.641354 3.275883 1.713903678 0.7770646 0.5197914  
0.106833804 0.1414423 0.586882 1.202362 7.600313 3.645093 3.305756263  
6.310247802 1.132390004 0.09193953 1.696655 0.4748018 0.1097692  
2.314334 0.3962872 3.534895133 0.7551681 0.164573088 0.1553202  
4.406617 0.1109412 2.258829 0.02475298 0.91655797 0.7035145 0.8882575  
2.293279 1.033302 0.4489864 0.3803376 2.035915 1.229817349 2.422459  
0.267504995 0.1953662 0.1089308 1.660457325 16.00611 4.00091 1.012572  
1.968415304 0.1441145 8.258213 9.428391 0.407967275 1.525461 0.3093332  
0.04599502 0.1312982 2.471007 1.09564 0.9469982  
AC093278.2 0.7061341 7.425823658 5.172515 7.008549612 3.240127797 6.808530306  
3.640621 6.181469888 4.920789 6.639828 1.869137452 1.045882 6.324181 5.077743  
0.8551664 5.618169 5.07189 3.081897469 8.172796 5.622911 11.391582505 7.46939  
2.893022389 4.02704 1.121979 6.950183036 12.82956 2.834788 1.502998 2.01736  
2.972775 10.283206674 4.605171 4.707415343 8.711639 7.261872854 5.846393806  
4.924034593 4.883648 5.613905 5.41764411 9.37508 7.803754762 0.5856767  
8.838281761 5.333372 1.918984 2.502907 9.537336619 2.909729 16.10417 0.2805781  
5.240769307 13.98418 5.525567326 10.29861 3.22831 2.432431 4.41757 1.919271  
1.614069 11.78522 0.803902735 7.400787 5.200192 2.741039 5.678203 4.282534  
7.469376 1.125964 5.249909 9.248949565 7.802861 5.090498 2.441257003 9.886088  
0.775803757 1.261902 3.933658 1.271053 4.75256 9.733454 6.357171 11.093680764  
1.793047785 2.181533 5.171621 0.3417653 3.986578016 12.08765 1.669943  
6.273353 5.25981853 4.130681 5.417395 1.838678378 5.359687 4.761234177  
4.802898178 7.115085 6.809982769 3.264517 0.6239731 6.279947843 4.870024  
1.896057 7.497852808 5.255497 5.962089349 6.653993436 7.013992 4.028723494  
14.39853 2.267556 1.370745 4.601135 7.033464 6.60795899 9.413401 6.822989  
5.966465 5.816068 6.209965 2.769191 3.762476 1.70852 0.8915656 11.55279  
4.085617 7.485113648 11.32069932 8.518678 5.444954701 5.188568932 6.781018  
7.947912078 4.74592 3.367126 3.116844623 2.970258293 0.765887295 3.276490811  
2.858141 3.839122 2.549041 2.663884 8.855927 4.933883 11.084457185 5.170226 5.75782  
3.560678354 2.528778 12.97548 4.393366628 4.716246 14.73944 4.305887873 8.65238  
2.376138 3.766536135 5.423354 3.366278 4.834502 2.601842617 7.020194 6.220276  
15.93876676 4.523302 8.796631388 0.2909397 2.550139 5.876022472 4.899078  
8.457978304 8.50114 3.789027 6.723115 6.160047 1.899936 1.324591 12.25109  
1.894177 11.4019 9.191583 1.729402 3.703689 12.99304 10.27569 9.446126958  
2.484062994 3.227437 4.833165 4.031519 4.737517 7.015381446 1.097628  
11.057918286 6.46442 0.3094012 6.495126667 13.48525229 13.53096 3.374171  
5.446619307 2.581313 3.614025 0.5610846 4.927874 1.513667 4.336419 4.494146  
9.096678 0.8561239 5.293899 4.699125 3.207987 4.630655 5.86895977 2.329888  
3.254194 2.532999422 0.7041578 3.888122 12.4557 2.308128 7.909052 4.96585885

3.029526 5.260809 3.333221 1.170237 4.193418 7.746385362 3.492488 0.8125114  
7.317689 7.550830976 4.432287998 6.243008 10.42791 3.980398 8.629633591  
5.244804 7.787864 4.506814037 10.91379 4.224377 4.729383 0.1765238 9.177181  
5.867348 6.078823492 11.33981 4.511852509 4.069847 5.716942 7.854864 5.024592  
8.750515 2.828537 7.87189 0.494360234 9.57568 4.913117 6.985351058 4.006836  
6.997056 6.05554 6.615235 1.674817 5.299014 8.778068 6.108508 6.673781079  
8.310142 10.474653653 4.061888 8.935644 5.396104 6.089586197 4.023233104  
3.076224 4.367552 8.342555 1.628914 8.59925 3.999246877 9.611531 7.3828  
3.664628 4.985003879 6.858191 4.865685 5.274885349 6.611696 10.425311  
3.357124 8.657716 7.187804462 3.725918 4.199205 1.67588443 8.861050399  
3.493733 7.673193 6.590149 3.84122 4.199961 5.136915 7.11205 0.7382035  
7.039618 10.850920418 6.404094 11.784884432 1.703665 3.794983239 7.044985  
11.18235 4.78475661 0.3738608 4.55076 2.786915 3.387586377 5.291283  
4.486401 6.968419137 9.384953937 2.179332 3.601932 4.383742 2.838813737  
3.275435306 4.676600066 6.722127 3.755195 7.65614 5.825511 9.444557 5.672139  
4.466964 5.499603 6.094757 4.13666 6.834481 7.779990408 6.073403 2.80342  
9.615378 9.67964 8.182362 4.519312 3.942957 10.09337 2.3853 2.138092 5.25244639  
9.004646 5.099719 9.622612 6.711086 3.380721121 1.827289 3.093397 4.97547  
2.477014 11.5917 8.330573 9.421332 4.200611972 3.376076 11.14536 6.00961614  
2.093327 5.420676 6.765993 0.6044641 6.425071 9.157023794 1.63806138  
1.833016 4.333434 0.5038397 4.327957439 11.083646162 0.350980534 2.88404  
4.613311 7.529318 3.900247 9.597789 3.276167 8.284441 4.005602795 1.768836729  
6.690643 10.919649 9.025825 1.210040528 5.703461 4.391876 9.660083 6.678888  
7.228874 5.94311 3.019148 1.457946 0.9665238 3.587274498 7.576245 10.60774  
3.126457 2.850522 3.569506532 4.360733 0.6945906 14.03522 8.755900877  
10.86301 2.099784 3.9082 9.764565 6.378768 8.232864 5.610785 5.58949725  
3.195098498 5.625014539 4.088256 15.642882658 10.498746728 3.463382 15.87164  
3.821755371 2.121947 3.672544 6.17502 2.997347579 4.266444 0.8581091 8.71025  
8.942266099 0.3601943 2.923675 4.276414 2.010712 8.980965 0.7695071  
6.466944 2.046446 3.756285 1.943313 7.942768 7.752858144 1.283258 1.144081  
5.030075 7.495739 3.015084 8.604482 6.498169 3.714772164 6.499151992  
13.140849618 7.890704 9.556414 15.75272 14.43254 9.005545 3.263993628 13.47735  
6.324863 4.123128 2.998995 2.145607 12.688562714 0.361566 2.185727 3.393384  
4.497483 2.374593 2.666394 7.451625 3.808986719 6.235904 5.183271 8.358732376  
5.121882 2.832357 12.34985 2.953813 1.389859 11.242372073 12.416964046 2.205469088  
0.812623 6.20253 4.459494 3.155024 5.739369 2.695869 6.440626876 6.867219  
1.176118097 2.786369 7.471705 1.475049 3.626593 1.275301 7.157841628 7.33746  
15.22914 14.59406 11.72257 0.4698314 5.261389 4.537397 7.275256752 7.652052  
4.804557536 0.3607702 1.475475 4.927916609 5.09715 3.376764 5.631863  
4.349662059 7.742557 7.074778 5.259671 6.268319259 3.127627 7.015994 1.031973  
1.142414 3.338631 2.870987 0.6918754  
LINC01532 5.997676 0.18241114 0.428739 0.23817768 0.300768917 0.121156468  
0.195933 0.193019834 0.09488058 0.1778633 0.306216297 0 0 0.1677778  
2.300006 0.4724455 0.01746159 0.471207701 0.1325623 0.07854537



0.206188871 0.06296835 1.414545777 0 0.1186746 0.072596913 0.2474614  
1.372959 0.4204321 0.4274729 1.197156 0.310592544 0.143002 0.334264691  
0.3254007 0.127338733 0.205593839 0.402670872 0.6885721 0.1792594  
0.210876997 0.2064471 0.706363411 15.80591 0.175198304 0.009812187  
0.07193603 0.034809 0.131320838 1.015753 0.1429899 0.007507338 0.318305991  
0.215597 0.148450942 0.6285426 0.8962023 0.5043124 0.2803926  
7.724567 0.2437556 0.1054933 0.526036379 0.2439895 0.01600109 0  
0.8274505 1.035838 0.1408345 0.1066034 0.4408517 0.330920783  
1.224171 0.1800953 0.25402197 0.2137392 1.153278448 0.5074674  
0.02187459 22.37917 0.1250484 0.03735969 0.2909288 0.165769641  
2.089508253 0 0.2740697 0.7379776 0.89284729 0.1803341 1.064998  
0.2611711 0.319487379 0.01741121 0.4725773 0.087040724 0.2752891  
0.069763832 1.070384611 0.1801501 0.017228729 0.3398301 0 0.065227053  
0.8726986 0.3295656 0.522362955 0.462036 0.926178472 0.106176974  
0.1340739 0.502235839 0.2621571 0.09821437 0.03863641 0.7153403  
0.07050819 0.912228814 0.09615007 0.7546001 0.09608407 0.05149971  
0.1588033 0.5801431 0.12596 8.160526 0.3680122 1.208534 0.5609601  
0.277173908 0.041310969 0.4508792 0 0.016480332 0.4362585 0.150995456  
0.4479255 1.099863 0 1.619807563 0.306058343 0.558377849 1.55172  
0.5232355 0.04968698 0.4522383 0.4705626 0.275248 0.105707166  
0.6624048 0.6921592 0 0.8396867 0.2511243 0.963765726 0.00700216  
0.1777812 0.191886354 0.1684214 0.8308434 0.343658296 0.2593755  
0.0309968 0.1442923 0.401279399 0.7438847 0.1573143 0.274051934  
0.3288465 0.511273035 1.127986 0.4789621 1.91057067 0.7025034  
0.474536374 0.3091419 0.2223953 0.1833764 0.4628443 0.5445719  
0.346875811 0.04066541 0.2162427 0.07844835 0.4722723 1.893361  
0.149683 0.234074 0.1761242 0.350623675 2.567434522 0.05555739 0.06159891  
0.01002429 0.71483 0.349553427 0.2886684 0.600535979 1.027675 0.01313149  
2.306537564 0.381251676 0 0.1428973 0.266678231 0.7124404 0.9328048  
0 0.06452408 0.4657583 0.350509 0.8353299 0.3116731 0.08381892  
0.2272943 0.02087985 0.5373582 0.03229147 0.256636359 0.3300885  
0.09920213 0.153012724 0.1733365 16.8933 0.3565249 0.8202486  
0.09550334 0.88396918 0.2120624 0.8418923 0.121858 77.95015 0.5996031  
0.118019726 0.5087691 1.349458 0.4445037 0.755202799 0.14810749  
0.2861042 0.1901444 0.03321426 0.178361315 0.4474 0.2916438  
0.281654035 0.2073516 0.4709596 0.2415336 0.007008607 0.2485135  
0.2366043 0.387148017 0.5401099 0.079170159 0.5914726 0.8756935  
0.06675138 0.2721965 0.4741597 0.3359231 0.3813669 0 0.008935418  
0.3308042 0.441479248 0.03663925 0.3269609 0.4465052 0.2247813  
0.06529249 0.1963855 0.3521065 0.3188275 0.243984317 0.1642349  
0.337532671 0.2435606 0.121882 0.1155828 1.287452791 0.082530413  
4.275618 0.04143056 0.3818707 0.1152229 0.0307675 0.789732029  
0.1671233 0.2918674 0.9788305 0.204119077 0.09419267 0.1222188  
2.241968652 0.2424347 0.403713708 0.2250084 0.3589215 0.151713654

|             |             |             |             |             |             |             |
|-------------|-------------|-------------|-------------|-------------|-------------|-------------|
| 0.4363989   | 1.118869 0  | 0.364972792 | 2.549891    | 2.221338    | 0.1948638   | 0.2306245   |
| 0.1713594   | 0.5649282   | 0.720686    | 0.02907476  | 0.1342519   | 0.137684458 |             |
| 0.3171002   | 0.425024357 | 27.06202    | 0.467910214 | 0.008542876 | 0.5731205   |             |
| 0.737042427 | 0.1807735   | 0.2762879   | 0.5134964   | 0.020142349 | 0.9736675   |             |
| 0.0247249   | 0.281205946 | 0.158595928 | 11.45663    | 0.6769387   | 0.1250125   |             |
| 0.287426859 | 0.356296577 | 0.172883201 | 0.03908808  | 0.009750889 | 0.02557187  |             |
| 0.05597253  | 0.1744583   | 0.4447082   | 1.090431    | 0.3076796   | 0.01368882  |             |
| 0.1356854   | 0.04931617  | 0.308064425 | 0.3279179   | 0.03217222  | 0.221262    |             |
| 0.1276761   | 0.0421377   | 0.144478    | 0.1897271   | 0.1637542   | 0.3453935   |             |
| 0.05370569  | 0.697512448 | 0.1389716   | 0.3770929   | 0.2048085   | 0.5092904   |             |
| 0.120743778 | 0.3748401   | 0.2344443   | 0.1356548   | 0.1788984   | 0.32852     |             |
| 0.2683267   | 0.3616526   | 0.066283898 | 0.1247837   | 0.2748793   | 0.394578749 |             |
| 0.09238381  | 0.05921723  | 0.07312961  | 0.0669581   | 0.2208945   | 0.714110844 |             |
| 0.084971331 | 0.01600064  | 0.06311979  | 9.831322    | 0.054690778 | 0.302731383 |             |
| 0.250099135 | 0.3944108   | 1.834217    | 0.08311337  | 0.01781244  | 0.2966042   |             |
| 0.1928141   | 0.2391151   | 0.386148246 | 0.196641039 | 0.2178543   | 0.010181806 |             |
| 0.2340988   | 0.673061128 | 0.07081827  | 0.1837888   | 0.3164024   | 0.1363871   |             |
| 0.5111675   | 12.05088    | 0.1583045   | 0.2130911   | 5.791496    | 0.424897934 | 0.198101    |
| 0.0657974   | 0.2094713   | 0.03042003  | 0.0682908   | 0.5052716   | 6.958295    |             |
| 0.2045319   | 0.104832947 | 0.5407094   | 0.3702213   | 1.251352    | 0.008968879 |             |
| 0.7303287   | 0.4449972   | 0.8223867   | 0.127218669 | 0.079606289 | 0.434134896 |             |
| 0.1718957   | 0.274415914 | 0.169246031 | 0.4631142   | 0.2078184   | 0.052778059 |             |
| 1.238951    | 0.3261996   | 0.09312288  | 0.337129264 | 0.188891    | 3.025478    | 0.2620783   |
| 0.082520762 | 0.2061999   | 1.212971    | 0.07065023  | 0.1124909   | 0.7636841   |             |
| 0.218565    | 0.219385    | 0.5089763   | 0.3382875   | 3.287812    | 0.09843692  | 0.409790935 |
| 1.710518 0  | 0.1104137   | 0.7391335   | 0.1199242   | 0.1987853   | 0.3992343   |             |
| 0.28005295  | 0.654070245 | 0.348199226 | 0.758745    | 0.5537714   | 0.1808115   |             |
| 0.5258047   | 0.3491518   | 0.057803558 | 0.0626977   | 0.6502085   | 0.2378801   |             |
| 0.2666636   | 0.112856    | 0.123386266 | 3.962097    | 0.3320195   | 0.5213263   | 0.6240647   |
| 15.06764    | 0.09632169  | 0.1696465   | 0.061149506 | 0.03784614  | 0.03189804  |             |
| 0.252156595 | 0.1780491   | 0.5771666   | 0.299636    | 0.313953    | 0.09972394  | 0.399818418 |
| 0.819557802 | 0.096515823 | 5.898511    | 0.249685    | 0.3258762   | 0.3236022   | 0.4826951   |
| 0.1923534   | 0.366006759 | 0.1492085   | 1.245587597 | 0.02803393  | 0.1342515   |             |
| 9.686114    | 0.3264545   | 0           | 0.20160009  | 0.2055837   | 0.3171162   | 0.06823355  |
| 0.1148744   | 0.204096    | 0.3661205   | 0.7646481   | 0.462340072 | 0.4142445   |             |
| 0.105708979 | 0.103609    | 0.5793455   | 1.351698969 | 0.3897805   | 0.7415151   |             |
| 0.2118358   | 0.116523249 | 0.03845163  | 0.233325    | 0.1849612   | 0.042577778 |             |
| 0.6415844   | 0.1674958   | 4.469081 0  | 0.5429026   | 0.1718257   | 0.6890528   |             |
| AL136295.2  | 0.1481385   | 1.375274354 | 0.3716907   | 0.615760211 | 0.602164156 |             |
| 0.400232633 | 0.4604956   | 0.369534792 | 0.1709629   | 0.05060324  | 0.318324943 |             |
| 0.7496776   | 0.2276459   | 0.7482284   | 0.6532574   | 1.102804    | 0.235977    | 0.212264246 |
| 0.1475315   | 0.1415289   | 0.356665344 | 0.4254789   | 2.285161059 | 0.8456908   |             |
| 0.9622648   | 0.621349882 | 0.361536    | 0.06808895  | 0.1818158   | 0.6391456   |             |
| 0.1367191   | 0.440723335 | 0.5621924   | 1.560512086 | 0.2788648   | 0.819458478 |             |

1.337751372 0.774752901 1.204229 0.9690087 0.510999266 0.8369813  
0.175555583 0.5719884 0.430479952 0.8751762 0.6805033 1.176027  
0.118311813 0.2830298 0.4048784 0.7101821 0.860321011 0.4855984  
0.376157695 1.189182 0.1929238 0.9736151 0.08237481 0.3192362  
0.1976476 1.283079 1.455628875 0.3846836 0.1081198 0.531688 0.1032204  
1.222643 1.226536 0.0785806 0.4085276 1.252182977 0.1494253 0.07685743  
0.568875133 0.2063203 0.100551418 0.4571962 0.2759068 1.3975  
0.2253215 0.2692698 0.5380122 0.212231392 2.411311948 0.1643134  
0.2592655 1.13693 0.576604759 0.1827784 0.2933491 0.4705975  
1.090754628 0.6431425 0.3991522 0.406348937 0.3306909 2.639818592  
0.284921351 0.2434559 0.16298101 0.2971607 0.2890262 0.396666931  
1.158679 0.1203721 0.387566246 0.6764312 0.632698555 0.440030355  
0.06039609 1.206621042 0.2361871 2.234245 2.158156 0.4027979 0.3387917  
0.802056891 1.591737 1.545107 0.2596971 0.139194 0.2052769 0.5345513  
0.9412335 0.3552269 0.4159519 0.8026106 1.407872 1.997730013  
0.829442727 0.3717889 1.928881573 1.291753578 0.2512888 0.961978793  
0.5188534 0.04756355 0.338369872 2.614659252 0.11581051 0.985165648  
0.1429775 0.1958133 0.3069589 0.6111573 1.202469 0.7206952  
0.624983008 0.2413962 0.807835 0.748111242 0.9380661 0.3716918  
0.397691121 1.211233 0.3342672 0.568026177 0.875406 1.018011 0.22747188  
0.8247564 1.089121 0.1857119 0.489125428 0.7953942 1.299194 0.24690355  
0.06237263 0.298051365 0.9194591 0.3305219 0.235795064 0.5933544  
1.549786881 0.5784593 1.202185 0.2891185 0.3375663 0.2380974  
0.585962402 0.2198219 0.1095869 1.554895 2.465894 0.3178507 0.09194656  
0.809802 1.178742 1.206124959 0.132429216 3.228465 0.6183922 1.842376  
0.5520145 0.861901765 0.9986768 0.674967195 1.150105 0.6033631  
0.325875273 0.766847491 0.5326937 0.2655294 1.267580239 0.4944087  
0.7501077 0.6521599 0.9417407 0.3809698 1.141138 0.5691779  
0.2267983 0.04854573 1.100681 2.17272 0.2104895 0.1090972 0.714040804  
0.483257 0.7038271 0.284325602 0.3123306 0.337674 0.7031818 0.5947987  
0.1659391 1.410766801 0.8358649 0.4254955 0.7959514 0.08715577  
0.4766512 0.478477565 0.8138388 0.6838745 0.0984762 0.853959136 0  
0.5996908 0.1835445 1.885209 0.964153933 0.8143846 0.9459099  
0.296044659 0.4385991 0.8910404 0.2176066 1.003976 0.1083363  
0.3058463 2.360456682 0.3012317 0.336257422 0.7215095 2.756666  
0.9321513 0.176567 1.428029 0.3466667 1.058621 0.56708913 0.6037687  
1.14445 0.141570263 0.4753392 0.1167169 0.3017048 0.351024 0.5042094  
0.08380941 0.4007063 1.422857 0.659443556 0.1726262 0.376814236  
0.7275928 0.9688941 0.4565823 1.241181817 0.948022548 0.6265403  
1.035806 0.6422107 1.183418 0.2078969 0.02923968 0.1451902 0.8414533  
0.169318 0.681506004 0.1566677 0.1179765 0.288553242 0.1092092  
0.08847259 0.0737158 0.7114045 0.768850066 0.2998739 0.3951938  
10.22095068 1.10250581 0.04078032 0.2294467 0.61446 1.020002 0.5017482  
0.9621526 1.213678 0.6483146 0.2512091 0.721011757 0.1469249

0.229752122 0.5845383 0.110936227 0.8774117 0.2050195 0.449195989  
0.4885966 0.1584024 0.1665461 0.163322898 0.1986143 0.3118581  
0.180011035 0.857309716 0.3804587 0.4305029 0.2162466 0.509814734  
0.945169016 1.594217548 0.0704318 0.2635481 0.4492536 0.0756416  
0.2233553 0.2140481 0.2971996 0.1705846 1.109949 0.122244 0.1713758  
0.520399996 0.7777736 0.2826051 0.5520271 0.3019488 3.018092  
0.9762417 0.1619358 0.3621245 0.5974615 0.2177345 1.425428759  
1.377251 0.1643889 0.9544116 0.1433871 1.405805218 0.5229017  
3.421757 0.7507581 0.1410292 1.141621 0.08790743 0.2482485 0.649429131  
0.1517701 0.1061353 0.126530562 0.083232 0.746914 0.7906221 0.2815168  
0.6482108 0.369237826 0.960402511 0.6487006 1.30794 1.090142 0  
0.741517119 0.399437263 0.2393102 0.5604177 0.6514552 0.6740113  
0.7187342 0.2265827 0.4616307 1.310675218 2.163897556 0.1766457  
0.908143499 1.32297 0.270938304 0.6938555 0.613628 0.228047 1.373979  
1.039612 0.2997814 0.7881764 0.3031289 0.3666544 0.499312571  
1.721024 0.787568 0.2516273 0.2740653 1.599668567 0.2090286 0.1462438  
0.7918646 0.604466494 0.3416343 0.2501596 0.3413196 0.4121002  
1.00671 0.3043086 2.375 1.190243249 3.184379422 2.192376636 0.2534191  
0.430661276 0.114360019 0.6258551 0.561694 0.499271962 0.3482596  
0.2159157 0.1742494 0.989299345 0.2042147 0.05947125 0.1549512  
0.2509178 0.2786597 0.1967059 0.133668 0.5067359 0.07938823  
0.4266455 0.2408885 0.2469146 3.375978 0.63173 0.7316552 0.18083062  
0.3719821 1.157007 0.4263248 1.612632 0.1440589 0.1111612 0.215811  
0.098730034 0.081279467 0.235279196 0.1511075 0.9579133 0.1879613  
1.382741 0.7197647 0.546812373 0.2662944 1.083323 0.1224657 0.2276025  
0.1423466 0.127043729 0.4656 2.761188 0.5506618 0.460017 0.6344092  
1.022762 0.6591261 1.046745288 0.02045819 0.5172863 0.227177227  
0.2105394 0.4991912 0.6411388 0.5939889 0.5183365 0.516824821  
1.107555021 0.45651209 0.02310516 0.708594 0.1727023 0.08924855  
0.451604 0.2042444 0.699711422 0.37956 0.333625854 0.02525681 0.9589779  
0.3903262 0.2714908 0.08553364 0.926307885 0.3175166 0.2779801  
0.461056 0.4346774 0.2528317 1.391561 0.6089382 1.029097132 1.56325  
0.117645877 0.02000254 0.1204509 0.618265522 2.081923 1.806232 0.1272338  
0.559893952 0.3117825 1.311718 1.181618 0.368255027 0.1576438 0.1760537  
0.2361324 0.1281034 0.3288918 0.5249879 0.1932658  
PTOV1-AS1 1.222403 2.665646311 1.845813 2.462381573 2.456172146 1.885035708  
2.528979 2.233034655 1.040695 1.76277 2.342244471 2.449573 3.246878 1.773104  
2.767759 2.713074 1.644057 2.414448979 1.633181 1.702084 1.770963722 1.951008  
4.795601132 2.637166 1.793155 2.098220053 2.605575 1.167791 4.3099 2.22385  
1.10561 1.999276001 1.948412 3.055717044 2.180758 2.379798666 2.973814027  
2.334291702 2.253129 3.366159 2.270499949 2.351775 1.641980394 2.138028  
2.207292865 3.78022 3.467118 2.508186 1.584077791 1.549331 2.253628 4.846879  
2.833240059 1.754879 1.956610697 2.707339 2.708783 2.976302 1.595813 1.832634  
1.334862 2.0017 2.791652768 1.587158 2.067658 1.960813 1.611336 1.883272

2.251336 1.931983 2.057218 2.842820531 2.0563 1.725699 2.653168429 1.789464  
1.304584671 2.99545 3.141868 1.916969 2.022345 2.087778 2.346393 1.517179256  
4.082625875 1.542916 1.635816 3.243704 1.931939191 1.848049 1.342528 1.830416  
3.27542676 2.051929 2.202731 1.801710794 1.312614 4.200237515 1.826903875  
2.08655 1.675927391 1.522016 1.96602 0.986995661 2.758021 1.061131 1.712215272  
2.919243 3.564164554 1.788552762 1.477743 2.97936476 2.308767 6.825279  
4.627581 2.023592 2.163923 2.618691261 2.921373 2.633531 1.8891 3.004018  
1.320054 2.109131 2.156917 0.8838836 1.748539 2.776662 3.984293 2.802413707  
2.290633629 2.011711 3.626398035 2.36708621 1.738367 2.476513312 2.358093  
2.764288 0.773209834 4.090474963 2.361166935 1.985636845 1.744918 1.442347  
2.731203 1.732507 3.250934 2.218837 2.507197053 2.520574 1.707807 3.922377677  
3.205378 1.757793 2.067440297 2.842272 1.604053 1.817197234 2.109747 2.676719  
1.573347167 2.86572 2.645452 1.693239 2.917903447 2.87836 2.489587 2.369639638  
1.671139 2.171881786 3.823066 1.625243 2.283980663 1.761132 2.431504959  
2.861536 3.431583 1.537882 1.616355 1.469557 2.557757252 1.136907 1.236783  
3.152922 2.433653 2.073244 1.375969 2.392774 3.376142 2.155132044 1.228614174  
3.776376 1.826147 4.040104 2.114263 2.554081407 1.641829 2.702002354 2.711304  
3.103531 2.175697571 2.091229644 1.889212 0.9524322 1.855307014 1.57706  
1.696086 3.605154 2.042604 2.051902 2.468216 2.34017 1.439604 0.834044 2.948012  
4.784346 2.072533 1.946742 2.269815362 2.338833 2.46013 2.898770633 1.701003  
1.296843 3.439172 2.657258 2.100513 2.81875631 1.799679 2.347613 3.356125 0.48536  
2.462392 1.453777506 1.775626 2.297782 2.404801 3.013275559 1.612655528  
2.793601 1.751769 2.106083 2.493277297 2.526384 2.344295 1.976861076 2.732661  
3.126573 1.164125 3.878476 1.967824 2.115025 2.530121508 2.252713 1.553840505  
2.350957 3.414752 1.849107 1.532453 3.136754 1.522725 2.07459 3.846774838  
2.832929 3.248096 1.466544936 1.819886 1.226866 2.210879 1.446912 2.459883  
1.057578 2.007446 2.055133 2.588233585 1.744427 1.631984029 5.030977 2.500369  
2.468622 2.73774752 2.026862417 1.472362 2.398197 2.841276 0.4649381  
1.888122 1.86044505 1.485203 2.944298 1.625018 1.909148002 1.921276 1.052593  
2.02894791 0.9743705 2.217119328 1.316703 2.91957 2.154481425 1.971976  
2.04606 2.25695251 2.691714567 2.290335 2.46037 2.367475 2.109958 2.407747  
3.063194 2.14642 1.340801 1.522974 2.054462664 1.397045 2.041694449 1.391224  
1.959841671 3.53333 1.967661 2.165976972 2.348583 1.540365 1.346812 1.548128543  
1.456115 1.361911 1.542792651 2.253803603 1.018042 2.120058 2.351653 3.141128326  
2.063363802 3.644346235 1.258045 2.374811 0.7616072 1.58099 2.417105 2.43474  
2.051229 1.424948 1.801745 1.160813 1.929048 1.82515162 1.617015 2.866829  
2.193891 1.836124 3.238678 1.110449 1.813195 1.934389 2.176832 1.436126 2.586537321  
2.503423 1.828976 2.313723 2.140674 3.997664518 2.544107 3.635383 3.019295  
1.486005 2.648979 1.730336 1.773123 1.564182885 1.237813 1.732293 1.32038454  
1.321494 2.844625 2.371231 1.565351 2.249561 1.563061274 2.374852498 2.194423  
2.354925 2.605953 1.245286756 2.299507934 2.970744739 2.733689 2.685454  
2.315665 2.596923 2.299334 1.224226 1.923972 3.30439008 3.488298133 2.438367  
2.235208038 3.516753 2.208201052 1.854039 2.903079 2.033297 3.913118 3.036556  
1.422582 2.677582 1.686292 1.904839 2.604604688 3.289887 1.291379 1.486999

1.729194 2.449434855 1.629677 2.276894 2.389895 2.984593761 1.804695 2.000741  
2.150772 1.688889 2.525968 2.346251 3.030527 3.398777403 3.969370691 3.237949267  
1.328687 1.607371742 1.577237704 2.366237 1.308882 2.731791967 2.466328  
1.637322 1.88225 3.164910538 1.78935 2.214381 1.900225 2.244648667 2.238586  
2.245246 1.785156 1.958854 2.803124 2.134844 1.56762 2.112709 4.116757 1.994797  
2.26383 1.562761839 1.945595 3.614849 2.69744 2.412686 1.705841 1.73859  
1.956163 1.494445731 1.408466999 1.660103807 1.691951 2.36222 2.218185  
3.106069 3.647253 2.397231689 2.323401 2.952268 1.393015 1.159619 1.872147  
1.385817206 2.375648 3.144866 2.020712 2.553993 1.63311 3.000951 3.789438  
2.075795119 1.668942 2.303543 1.986511614 1.582298 2.096042 2.231016 3.034377  
1.632438 2.797413696 2.380046696 1.164880881 0.8336165 2.635714 1.473332  
1.992288 2.70221 2.069123 2.487196918 2.002697 1.067316972 0.6823123  
2.303234 1.26853 2.270865 2.654254 2.159595999 2.391318 2.215011 1.929771  
1.677544 1.801518 4.979425 3.368146 2.514897435 2.08753 1.120137024 0.6114696  
1.311225 2.164390688 3.071616 1.961312 1.537704 1.896910519 1.834791 2.631699  
3.222832 1.648522805 1.915735 1.068332 0.619833 1.396428 1.937975 2.325478  
1.776789

AC002553.1 0.3350928 1.619326827 0.4480245 0.8602984 1.682605827  
1.135300557 0.664819 0.688385262 0.3582866 0.5184624 0.434858862  
1.342819 0.2827123 2.872139 1.609469 3.748289 1.45064 1.265327813 0.7655923  
0.6151741 0.726700079 2.100391 4.707144657 2.542105 1.385151 1.218397066  
0.723996 0.4122268 0.4021994 2.220979 1.358327 0.91873623 1.669096  
2.524490316 0.9390623 2.167661811 1.648567497 2.508493674 1.488728  
2.912793 1.24480715 2.431554 0.654064942 1.714828 2.064935034 1.630316  
3.984108 0.4819658 0.293861759 0.369068 2.005552 2.267927 1.225550438  
1.236278 0.864224649 2.848191 1.297785 2.257039 0.3222478 0.9812333  
0.3068221 1.631388 2.522425957 0.8957565 0.4028204 1.238064 0.672992  
1.551403 3.151508 0.561136 0.5073485 2.818582693 0.2584733 0.3579333  
1.041453878 1.588615 0.140483621 2.225994 0.3304099 0.7008948 0.5596513  
0.4702569 1.310611 0.307497354 2.186843776 0.3060901 0.9831908  
2.731005 1.173580011 0.5296471 0.5635403 0.4551832 2.116567194  
1.022746 1.171104 0.61752345 0.6416929 2.634411055 0.469521747 0.5039112  
0.303608016 0.4277538 0.7097229 1.108392259 1.946448 0.5830093  
0.515696448 2.45555 2.382858144 1.692874017 0.3375253 2.207607122  
1.099949 3.33788 1.42656 0.5002328 1.08473 1.770792272 1.361551 1.626235  
0.639274 0.4815507 0.8690876 2.174131 1.772023 0.872283 1.094901 1.529908  
3.732223 3.223047716 1.574835364 0.9426841 1.908889269 1.078701436  
0.5221245 1.601953123 1.242697 0.3322628 0.427723869 4.191066929  
0.493112654 1.327597874 1.331723 0.9524533 2.626781 1.252339 3.403092 1.27758  
1.147613081 1.648838 1.702879 1.91621885 1.46562 0.5870378 1.129775019  
2.37973 0.8561949 0.920124806 0.7175273 1.282855 0.512024452 2.419817  
3.407446 0.3978448 1.782711836 2.119646 1.87015 0.459942523 0.5373807  
1.918042629 3.628448 0.4361282 1.691109259 0.6816177 4.579394344  
1.616368 6.46396 0.6155227 1.16519 0.5040206 1.550009372 0.7370885

0.6974889 3.467052 2.026577 0.799343 0.2911794 1.39068 1.625745 1.765359599  
0.197355858 2.447608 0.6645967 2.094564 0.6169897 1.744532655 1.220873  
3.068551874 1.172292 0.8595069 0.488282917 1.093707868 0.2255284  
0.6295412 0.85655103 1.333035 0.7374812 1.172979 0.8446701 1.527369  
1.303532 1.537419 0.3923118 0.3466601 3.147119 5.072436 0.3332926  
0.2845233 1.197131253 3.341245 1.0926 0.409278034 0.914293 0.6427083  
1.698041 1.787936 0.5323707 2.585649217 2.780509 0.8443247 1.278218 0  
1.183902 0.70032956 0.7580269 0.5459789 0.6420599 2.308587964  
0.186427072 2.719329 0.5128717 1.755924 1.391952159 2.344564 1.696819  
0.925706442 1.316344 3.082613 0.1216101 2.399565 0.8879796 2.02 1.337280605  
1.381286 0.683339725 0.540259 3.475361 2.632684 0.4796699 1.568832 0.4305238  
1.193606 1.250070914 3.284201 3.830811 0.301397896 3.062292 0.2640164  
0.9943585 1.043729 0.9627444 0.3382681 0.933066 3.023878 2.738396922  
0.3904845 0.461806396 2.775324 1.155134 1.00722 2.497922625 1.480337835  
6.873194 1.590569 2.093591 1.276302 1.02629 0.299579111 0.5108811 12.29504  
0.256273 1.632263935 0.5472137 0.2197718 0.806294034 0.2034396  
0.521900032 0.3261373 2.710708 1.479988445 1.56413 1.488372 1.44242616  
1.540346334 0.5317713 0.3739953 2.187085 2.164007 2.408593 2.162496  
2.107374 1.3175 0.7539406 1.018180427 0.3193144 0.525263042 0.8285131  
0.537307581 1.268873 0.4880078 1.309745043 0.5998905 0.4636951  
0.5170819 0.684551026 0.6474777 0.3527152 0.5775167 1.330861093  
0.4134286 0.7184219 1.007084 1.515005203 1.661039042 3.635416462  
0.1640042 0.7118757 0.2896923 0.352271 0.7396903 0.6594513  
0.9227269 0.77457 1.275057 0.4554426 0.5143411 0.420083488 0.5559618  
1.518603 1.014057 0.8638133 10.92622 1.636726 0.7667215 0.5059358  
1.026026 0.8788112 2.869490949 4.285722 0.7349535 1.084531 1.06843  
2.852615176 1.552446 4.698018 1.675001 0.2064191 3.249065 0.798319 0.635866  
1.063775973 0.6282753 0.3789505 0.404068385 0.9561302 0.9938453  
2.715484 0.9364671 1.54117 0.547139139 1.477934819 1.047304 2.198135  
1.548457 0.192754304 1.238433698 0.572376051 0.8105404 1.04397 1.213559  
2.152418 2.240064 0.316566 0.4944686 3.5945513 2.121579569 0.6855484  
1.666096411 10.55443 0.793124348 1.559967 2.177319 0.4602169 3.495913  
2.115007 0.781824 1.636049 0.4799793 0.7092894 1.906788793 3.989685  
1.183158 0.3124948 0.9700271 1.977069753 0.8826117 0.790045 1.308125  
1.108431953 1.414247 0.5556249 0.7514293 0.474154 1.673099 0.5398848  
0.9926204 2.488231709 3.988066609 3.365029777 0.21637 0.601690723  
0.191731273 1.854793 1.104478 2.840020598 1.359886 0.5027714 0.9196978  
2.352134179 0.7037769 0.6370172 0.3092675 0.830969671 0.5969642  
1.038225 0.320146 1.014767 0.8626788 1.650684 1.363471 0.8213626 3.537516  
2.608604 1.440399 0.421073794 1.055915 1.928446 0.9927201 0.6277183  
0.3689937 0.9836104 0.2847656 0.459796356 0.454232634 0.657432266  
0.3820215 0.9758668 0.4901994 1.645669 1.489787 2.376792934 0.699  
2.354404 0.2994264 0.6006493 0.3030506 0.236662507 0.7408526 3.25765  
1.372757 1.305813 0.7624546 3.931732 2.348927 1.282843435 0.5526008

0.9368559 0.71943232 0.196101 1.133334 1.964377 2.639812 1.21663 2.122455777  
1.94597367 1.822307792 0.1721652 2.954284 0.4021466 0.4322657  
0.8880043 0.6571845 1.213559177 0.928017 0.932238827 0.1411484  
0.5310994 1.064706 1.027294 0.971948 1.801693974 0.7763221 0.6257152  
1.223897 0.8482946 0.7492955 2.937894 1.392164 2.019745187 1.31831  
0.688775329 0.2608311 0.0841429 1.221533444 5.79408 0.9679351  
0.6221687 1.368930241 0.4678681 2.138083 2.624469 0.728876339 0.8809967  
0.5153662 0.135347 0.2982956 0.7069312 1.749062 0.9327891  
AL035563.1 0.5444122 1.246897204 0.3077604 0.556999468 1.315253288  
0.750569172 1.419323 0.580298014 0.1452185 0.1596518 0.432624074  
0.5784737 0.7090081 1.540743 1.176258 1.145685 0.4925156 0.515144222  
0.6035604 0.2862304 0.421975774 0.4749937 1.471785581 2.332281  
1.599341 1.19049031 0.9300565 0.2313432 1.180341 0.8471626 0.6967879  
0.244478107 1.475241 1.700921351 0.3852424 0.867092497 1.72818461  
1.020706203 0.4994892 1.304118 0.791784512 1.518616 0.213027974 1.370807  
0.68952315 2.934934 3.019911 1.050309 0.354128243 0.137377 0.8486087  
1.713693 0.577246691 0.6285329 0.535566434 1.951504 0.3953747 3.139988  
0.2478952 0.6352986 0.6715397 2.876654 4.929302188 0.2267287  
0.2204126 2.322637 0.2505057 1.513719 1.457547 0.1144244 0.3965824  
0.947854742 0.1865007 0.2487005 0.704583801 0.4272801 0.16268553  
2.158618 0.3826276 1.600137 0.4192385 0.2613964 1.175132 0.618077388  
4.081010025 0.5316964 0.2966283 1.306997 0.964005228 0.4731573  
0.6229381 0.237204 0.628698848 0.7766145 1.404619 2.314900731 1.377717  
2.105018251 0.340418852 0.2494672 0.214721013 0.1573482 0.459123  
0.149748854 1.285485 0.3856131 0.443418525 1.069165 2.790597975 0.232154331  
0.2931506 2.645972773 0.2522091 2.555456 2.973623 0.2476461 0.9969342  
1.110232964 2.838114 1.364935 0.5762369 0.4536305 0.1811587 0.7697331  
1.759382 1.379361 0.4037895 1.413328 3.916138 1.904686197 0.936807615  
0.6516572 2.325973147 1.751252128 0.2439412 2.278029881 0.8634553  
0.1846912 0.058656432 1.519972932 0.184696963 0.549398088 0.9021798  
1.024362 1.685469 2.135834 1.829532 0.6319168 1.135411904 0.4296194  
1.042179 1.361693707 3.583798 0.8157752 0.193031363 1.157445 0.3244933  
0.539429893 1.461672 2.26715 0.855680038 1.010809 1.463919 0.2433803  
1.331570292 1.083137 1.226809 0.169776271 0.5373712 0.328791378 1.620727  
0.4411791 0.400575824 0.6336054 2.269676795 2.214984 3.554148 0.310736  
0.2987816 0.4517649 1.285553536 0.2347338 0.2393608 1.806742  
1.267302 0.4165517 0.06248064 1.707362 1.738419 0.627245436 0.128557016  
2.478098 0.346333 1.985767 0.3081274 0.788428807 1.363325 1.58347567  
1.874838 1.998342 0.357609377 0.372212525 0.4466018 0.1874657 0.446363825  
1.313554 0.6371528 0.7094984 1.845338 0.7878994 1.065969 0.8932654  
0.2830716 0.2356313 0.6957657 3.971851 0.3780195 0.190633 1.614078202  
0.8029284 0.2765525 0.326195985 0.5847392 0.5772139 1.618064  
0.918602 0.4653627 2.032185492 2.955903 0.6375401 1.651932 0.09870858  
0.7249186 0.287539567 0.4495068 3.74617 0.3728274 0.82898957



0.259067813 0.9651534 0.2138132 0.9041497 0.64347408 0.8624424  
1.079796 0.564512894 2.649264 1.989469 0.2323682 1.278039 0.5679104  
0.3913727 1.133907207 0.3936473 0.281912788 0.8652158 3.932999  
1.211392 0.3642339 0.8353185 0.4567196 0.2839607 1.623997351  
3.587022 1.492888 0.147247266 0.4422137 0.1456767 1.002561 0.4390564  
1.125773 0.908507 0.4254575 2.636054 1.173629564 0.2393981 0.365796276  
1.849881 1.053431 0.419904 1.183374059 0.784963975 1.419181 1.956685 1.636511 0  
0.3935451 0.298039541 0.493307 2.603707 0.2568238 0.645827049 0.5418091  
0.1603377 1.067942299 0.2332351 0.615513987 0.196791 1.559089 1.119553606  
2.23181 0.4503582 0.75167367 1.098433766 0.2177335 0.7238978  
0.9799533 0.742633 1.395663 2.284287 1.694558 4.167113 0.5012757 0.688640356  
0.09508592 0.27372382 1.307594 0.452308406 1.412122 0.3427649 0.644612805  
0.8839416 0.0988526 0.4850289 0.753100031 0.2289582 0.2162425  
0.106790172 1.126994619 0.4924456 0.8880697 0.7806534 1.508290653  
1.601353884 3.668886421 0.6495377 0.370971 0.2851537 0.1909176  
0.3131908 0.3436517 0.673189 0.3518931 1.508492 0.1525752 0.4066696  
0.420986351 0.4565308 2.057564 0.640086 0.3349941 1.492562 0.5370281  
0.4519523 0.3808308 1.141859 0.8337293 1.685049862 0.4254029  
0.7659944 0.8060592 0.1600736 1.559656917 0.5869266 4.982558  
2.830479 0.3324848 1.344254 0.4373523 0.218397 1.391315806 0.1473324  
0.3090957 0.193019888 0.3097269 1.165298 1.978722 0.5465707 0.6209775  
0.725029192 0.790445697 0.9970768 1.421508 1.309605 0.444839647 1.960930731  
2.65464963 0.7919754 0.5649555 0.4252391 0.7828273 1.127084  
0.2199575 0.4257261 2.226614918 2.690275016 0.257221 1.322384394  
2.038107 0.413311064 1.86973 2.155815 0.7471538 2.033239 1.102168 0.3710453  
2.153295 0.1765593 0.273795 1.938851154 2.116222 0.4685889 0.2748035  
0.3990775 2.777292324 0.6831528 0.2839354 1.015278 0.705984167  
0.7646259 0.4016282 0.1957915 0.3059209 0.5365425 0.3094778  
0.8719728 5.199483666 4.125173042 1.993381573 0.2665099 0.348390701  
0.166524238 0.5799391 0.7118805 1.341506639 2.008955 0.1484684  
0.3477062 1.554287013 0.2973653 0.4474255 0.3008408 0.365371533  
0.757433 1.517026 0.3522045 0.3812373 0.6679134 0.9398484 0.3057972  
0.1797711 1.832082 1.522925 0.7425464 0.285257659 0.3439099 1.152734  
0.6828675 0.7126435 0.3146549 0.3237327 0.2793343 0.095843191  
0.256434343 0.251239656 0.2200337 1.264088 0.3375609 1.789747 1.048078  
1.402891227 0.3172598 2.418788 0.170897 0.2393598 1.016642 0.107912875  
1.459538 2.211372 1.139872 0.903765 1.648913 2.175258 2.94889 0.37436689 0.68517  
0.836935 0.749817701 0.2116827 1.514359 0.7616114 1.433315 1.117061  
1.094646511 1.624973402 0.39568195 0.314014 0.9171666 0.3017746  
0.164614 1.583108 0.5767923 0.52700588 0.4490627 0.250263732 0.2942196  
1.132221 1.082609 1.408358 0.09963919 0.700864875 0.5779359 1.011945  
0.6825516 0.6028108 0.9929122 1.350872 0.5821764 0.86521105  
0.4614144 0.114205939 1.135934 0.0876967 0.58200008 3.835121 0.9727869  
0.3705406 1.239911351 0.2269995 2.571214 0.6507401 0.469202129

0.6121372 0.3418118 0.1057975 0.2487153 0.9455454 1.950343  
0.5884281  
AL031717.1 0.05595928 0.480301192 0.2601642 0.592080937 0.477681371  
0.50510453 0.3348577 0.172436745 0 0 0.168346005 1.06741 0.7273588  
0.8393642 0.6129393 1.330145 0.5303843 0.252575668 0.3343799  
0.5301697 0.265250123 0.3937751 0.40670889 1.702574 0.4240777  
0.562079991 0.5257949 0.3150771 0.1201915 0.8775308 0.1807596  
0.388460568 0.9291101 1.158282283 0.2552496 1.083425634 0.40815532  
0.951153657 0.3184279 0.7861599 0.415756516 0.8694659 0.029013279  
0.3308548 0.76834957 1.823295 1.842263 0 0.260704791 0.3367804  
0.7542854 4.292337 1.204359845 0.6848227 0.232085969 1.572246 0.08502306  
0.6293173 0.1524736 0.1688279 0.1306573 0.2154145 0.89512638  
0.1453141 0.1143582 0.9841404 0.1592152 0.8199564 1.286122  
0.1385244 0.2700621 0.96573227 0.1128907 0 0.414964638 0.3818934  
0.066470716 0.9616569 0.3647829 0.1895045 0.7447572 0.4450101  
0.656602 0.280596195 0.755065218 0.1448285 0.09793747 0.290084 0.25411431  
0.1074025 0.09696098 0.02393031 0.901320472 1.244362 0.4749558  
0.226207848 0.5829524 0.830992199 0.463632401 0.03576432 0.153915062  
0.2143 0.1389558 0.291357126 0.9848039 0.4137818 0.10980227  
0.5732858 2.145819424 0.733541945 0.07985112 1.111014249 0.4684029  
1.023646 0.414196 0.1065097 0.391934 0.471297147 0.2576907 0.5107058  
0.1716759 0.2629024 0.3207472 0.8716498 1.191473 0.939308 1.12379  
0.9624389 1.288648 0.754641881 0.695935761 0.2730838 0.717249492  
0.795037471 0.2044523 1.002067692 0.5879901 0.09432736 0.191728669  
1.20589656 0.021873692 0.91452903 0.2205397 0.3739513 2.079918  
0.8080257 1.161786 0.4917927 0.519391694 0.4787335 1.686407 0.57697252  
0.9601855 0.4273241 0.15773908 1.276116 0.4143212 0.457131032  
0.6018455 0.2771046 0.300746007 1.417559 1.698405 0.3928545 0.787267984  
0.7010731 0.4060008 0.081609271 0.08246435 0.57317939 0.319905  
0.1092477 0.342925316 0.3399448 1.519093818 0.212443 3.588276 0.08191082  
0.1837724 0.3434119 0.464828935 0.174379 0.0724437 0.6852544  
1.725998 0.2941666 0.02431295 0.6691616 0.4195809 1.167509138  
0.035017566 0.7941265 0.1257833 1.934351 0.1094747 0.810827191  
0.412617 1.189853674 0.6311848 0.563097 0.112394996 0.253466848 0.03201305  
0.09574438 0.558632707 0.412844 0.0826446 0.5351811 2.282679 1.029278  
0.8824622 0.3762619 0.2141825 0.04278898 1.286023 1.268423 0.08348797  
0.173088 0.593403114 1.105833 0.354494 0.170869851 0.2949569 0.6017328  
0.6197956 0.1429814 0.1218845 0.842352224 0.8525188 0.1956723  
0.2177268 0 0.3781151 0.120496499 0.0742066 0.1722223 0.1822768  
0.853664222 0.264627454 1.481407 0.1456011 1.216568 0.318682738 1.402995  
0.5789861 0.335492329 0.6443138 0.5048853 0.02877028 1.227201  
0.08594042 0.5514092 0.675640616 0.3676298 0.040415816 0.2618618  
1.546217 0.7553539 0.2334434 0.5809325 0.3055576 0.6261495  
0.449857253 3.129168 1.182113 0 1.152172 0.06613466 0.7057305 0.8210951

0.5333018 0.2216128 0.2317802 1.006836 0.653899561 0.09781423  
0.15732477 0.6871198 0.9223186 0.3812579 0.703284059 0.774160839  
5.154264 1.443488 1.698164 0 0.2748654 0.038658479 0.1919594 4.658617  
0.3357891 1.072661157 0.3624847 0.09358776 0.095375784 0.08663285  
0.818802081 0.1705575 0.883561 0.711560531 1.480156 0.8859701 1.22848756  
0.613747063 0.1078333 0.1263988 1.044504 0.5244435 0.7399163  
0.7466585 0.4160159 0.3896147 0.03690329 0.891765783 0.03237549  
0.138073078 0.3024125 0 1.343212 0 0.309857087 0.2642667 0.05983644  
0.1100973 0.107966553 0.2954168 0.02945108 0.132220495 0.802874342  
0.1676712 0.1422946 0.2859048 0.834523537 1.603299561 1.199238839  
0.04655978 0.104533 0 0.1800136 0.06562296 0.3483054 0.2292119  
0.112767 0.4402469 0.1616217 0.3524579 0.275213307 0.4543709  
0.5460878 0.6690275 0.2281221 4.366734 1.204665 0.6601391 0.07979558  
0.3702741 1.311417 0.79031337 1.696745 0.2608109 0.6056882 0.4928962  
1.062084954 0.08641761 3.619189 1.223431 0.07991059 1.621169 0.02905613  
0.08205383 0.532940134 0.08918173 0.1637113 0.286781279 0.036681  
1.763416 1.110632 0.2924429 0.6991438 0.465988236 0.496866955 0.68613  
1.428518 0.9728792 0.039086966 0.439479569 0.284364527 0.201344 0.3134753  
0.1188006 0.5092151 0.9137074 0.2995704 0.03051665 1.123159737  
0.652495239 0 0.873220523 8.593553 0 1.67656 0.8499252 0.1758787  
1.151972 0.3074529 0.5350701 1.07184 0.0400774 0.4101836 0.528122465  
1.21355 0.1007673 0.3326825 0.6884617 0.732101551 0.3316341  
0.154682 0.8691604 0.124871812 0.3764024 0.4579504 0.2051213  
0.09614956 0.8351342 0.07663498 0.1610279 0.594489637 0.682726074  
0.653204177 0.3071305 0.284693781 0.151198113 1.391634 0 1.084448998  
0.655245 0.09515578 0.1023908 0.722829009 0.1349986 0.03931418  
0.05853275 0.184302455 0.1473691 0.1733797 0.05049303 0.2679871  
0.1049611 0.5640782 0.367482 0.3031337 0.5889289 0.5846578  
0.7255041 0.149425302 0.1405161 0.2817881 0.676385 0.3818686  
0.595199 0.09797926 0.04755481 0.108777781 0.107461526 0.093320474  
0.08562121 0.2770425 0.1491049 0.1523463 1.268824 1.686891976  
0.4480943 0.891201 0.04047872 0.4513781 0.05377137 0.146971606  
0.1795444 0.7909703 0.3854346 1.07159 0.4329123 2.458578 0.6062236  
0.946897391 0.1893379 0.3799537 0.180213864 0.1192968 1.154987  
0.6245952 1.682843 0.7949539 0.621187677 1.098243718 0.172447298 0  
2.052146 0.3196674 0.3067939 0.6965892 0.1227438 0.574203221  
0.2195486 0 0.03339263 0.4797413 0.368614 1.323608 0.1130861  
1.116632571 0.1049491 0.2756431 0.3962225 0.4925978 0.6989383  
0.6541569 0.5855213 0.510222715 0.6982465 0.577729009 0.2644584 0  
0.941275682 3.382664 0.1308527 0.3784925 0.948444252 0.06870251  
0.8004245 0.9012951 0.273869308 0.9118576 0.1662605 0.0240151  
0.2258247 1.070365 0.9610602 0.3716674  
LINC00861 0.01104717 1.266502506 0.2853342 0.449277873 0.396850795  
0.287273894 0.3816104 1.477968278 0.0111556 0.1518893 0.600980141

1.16148 0.1213097 1.165836 0.4702619 1.696734 0.3048778 0.138505758  
0.2750475 0.3232243 0.293821303 0.6357766 2.408705688 1.068537  
0.5593955 1.387033522 0.3986843 0.2621318 0.1542289 1.174163  
0.08921139 0.462865096 0.7428498 0.921792062 0.2659469 1.860789204  
1.536310695 2.604726679 0.9086452 1.370927 1.379908152 2.699509 0.32074778  
0.03499044 1.005603874 0.0934472 1.310973 0.3990356 0.154400636  
0.1181961 0.8382012 0.05031254 0.700065136 0.528101 0.114542778  
2.143128 0.1174934 1.869191 0.2150034 0.3832842 0.08167986 0.7760979  
0.384346062 0.6275303 0.09312582 0.6452987 0.1953236 1.678835  
1.070792 0.09913181 0.3332134 2.353937115 0.1281459 0.1872292  
0.312319974 0.3105402 0.144345039 0.6264882 0.0360067 0.05144  
0.7792367 0.3645833 0.7021228 0.215420054 1.213188829 0.06075635  
0.6791161 0.2759216 1.959254082 0.2597344 0.3110493 0.3448657  
1.57174712 0.360294 0.5756014 0.298641585 0.3416532 1.090931321  
0.503402406 0.307127 0.358543578 0.3454982 0.5417796 0.1265398  
0.8964667 0.267052 1.398137398 0.5862458 1.802161471 1.500549233  
0.3389208 3.793287799 0.2558322 0.799669 0.2089633 0.3995046  
0.6134607 3.574318988 0.2882738 0.9557801 0.2275558 0.05968583  
0.47003 0.8161994 0.5906483 0.09693084 0.2855759 0.764869 1.441587  
1.419938659 0.813918264 0.5040649 1.309757218 1.121915017 0.189196  
1.837467498 0.7319345 0.09621149 0.381654159 2.947992932 1.116249958  
2.29232609 0.1306131 0.6842859 0.335495 0.3868261 0.6488284  
0.1790041 0.442766488 0.4751697 1.498145 0.622396794 1.026753 0.3711837  
0.269879698 1.711599 0.4253234 1.530929178 0.5437978 0.9964024  
0.749566339 0.756124 0.5284457 0.07028434 1.135106707 1.043781 0.9864664  
0.330272319 0.2055306 1.509896858 0.3820808 0.4313415 0.184631984  
0.7020739 0.732291947 1.199464 2.954742 0.2290803 0.3006001 0.2316311  
1.238812964 0.2409745 0.3360836 0.7932274 1.351589 0.09540518  
0.1679904 1.221945 0.7898557 1.045606307 0.197019691 4.605178 0.865996  
0.08839553 0.1152634 1.146439847 0.9856241 1.474380834 1.509419  
0.7132988 0.329127788 0.397176661 0.09163764 0.1827127 0.85955196  
1.460232 0.5574372 0.02641311 0.6053969 0.4193584 0.5507307  
1.223136 0.2114135 0.05913012 1.843967 1.200471 0.5658726 0.05979761  
1.011718192 0.4778505 0.4505105 0.826438124 0.698745 0.2165057  
1.104608 1.961748 0.1467767 0.724559983 0.9381138 0.6808277 0.2364033  
0.01895684 0.481048 0.184355013 0.4834319 0.2252444 0.5628937  
1.61186588 0.478878298 1.05859 0.3616922 2.170298 0.736076953 1.793873  
0.7589533 1.186639025 1.465943 0.754182 0.1561909 0.03460959 0.3534558  
0.634994 1.737131133 0.7741378 0.446805173 0.1532396 2.88893 0.8397683  
0.190101 0.3583889 0.2736009 0.283578 0.525449095 0.8667309 0.9287968  
0.124048876 0.1292359 0.3351023 0.7026643 0.6378125 1.138356  
0.430204 0.1601486 0.755826 1.40563781 0.09333136 0.71174983 0.1627768  
0.9230392 0.09094618 1.978447162 0.400270342 1.344588 0.7087601  
1.496616 0.5039614 0.5806076 0.370139403 0.389482 5.401392 0.5026962

|             |             |             |             |             |             |             |
|-------------|-------------|-------------|-------------|-------------|-------------|-------------|
| 2.202291041 | 0.3296857   | 0.1909142   | 0.651938639 | 0.2650899   | 0.350227189 |             |
| 0.2116432   | 1.187233    | 1.143845806 | 0.5609276   | 1.098751    | 0.24252113  | 0.832992225 |
| 0.2075565   | 0.4042375   | 0.2921169   | 1.841403    | 1.090489    | 3.313796    | 1.312085    |
| 0.2333105   | 0.2185572   | 0.476542108 | 0.2141115   | 0.675988806 | 0.04643379  |             |
| 0.173730318 | 0.1114917   | 0.2021541   | 0.830895889 | 0.1420185   | 0.2835018   |             |
| 0.08693914  | 0.877432583 | 1.19555     | 0.784899    | 0.43068678  | 1.780782354 | 0.02482553  |
| 0.4354104   | 0.2187117   | 0.966304282 | 0.714484743 | 3.956544737 | 0.1102989   |             |
| 0.1100604   | 0.3698137   | 0.5468792   | 0.3789313   | 0.1439673   | 0.3490693   |             |
| 0.4480193   | 0.3717862   | 0.1481371   | 0.4149965   | 0.389372659 | 0.4248917   |             |
| 0.1078056   | 0.5283026   | 0.2786515   | 5.685111    | 0.7134546   | 0.2183757   |             |
| 0.4542056   | 0.1559412   | 0.3946533   | 1.092134654 | 0.3104524   | 0.4805531   |             |
| 0.5081792   | 0.2900432   | 3.505434676 | 0.1748658   | 4.802894    | 1.059511    | 0.199823    |
| 0.9352956   | 0.1548747   | 0.2632274   | 0.230877619 | 0.2640864   | 0.2354667   |             |
| 0.285432712 | 1.010169    | 0.3690111   | 1.109171    | 0.2440508   | 0.7279497   | 0.490628192 |
| 0.286092011 | 1.01589     | 0.4155937   | 0.5868511   | 0.100312288 | 0.43046106  |             |
| 0.417022552 | 1.524627    | 0.4331918   | 0.4368113   | 0.1005264   | 0.6818326   |             |
| 0.09462321  | 0.4277342   | 3.417777211 | 2.135305838 | 0.2113175   | 0.782921121 |             |
| 5.307165    | 0.580886369 | 0.9554621   | 1.037232    | 0.2678476   | 0.6778741   | 1.504895    |
| 0.2660324   | 1.660446    | 0.1463693   | 0.1398679   | 2.977897034 | 1.462389    | 1.024486    |
| 0.9003128   | 0.6187584   | 2.312438161 | 0.3346211   | 0.2824622   | 0.8793719   |             |
| 0.658194868 | 0.7207803   | 0.2511278   | 0.1336298   | 0.04428972  | 1.084519    |             |
| 0.5087075   | 0.5443904   | 0.997566905 | 0.530696073 | 2.264717879 | 0.1598479   |             |
| 0.571393616 | 0.13133421  | 0.1856274   | 1.946597    | 4.619134773 | 0.3024105   |             |
| 0.3874431   | 0.1490739   | 3.46209743  | 0.07195679  | 0.2328356   | 0.1935497   |             |
| 0.291071661 | 0.1018247   | 0.3223104   | 0.6877955   | 0.7142108   | 0.07942984  |             |
| 0.6981237   | 0.5271693   | 0.1265909   | 1.967293    | 0.1841222   | 1.417059    | 0.168142623 |
| 0.02542825  | 0.02781451  | 0.06398223  | 0.7664279   | 0.274952    | 0.36509     | 0.2722521   |
| 0.118108649 | 0.461414334 | 0.254848802 | 0.2394572   | 0.6211469   | 0.2330307   |             |
| 0.5263187   | 0.7890251   | 2.049072512 | 0.1548055   | 0.8608293   | 0.3196433   |             |
| 0.5495026   | 0.140652    | 0.21553488  | 0.2658349   | 0.8798391   | 0.3360657   |             |
| 0.2715809   | 0.1629141   | 3.336841    | 0.5385477   | 0.535629716 | 0.301694    | 1.931464    |
| 0.984291771 | 0.1236423   | 0.5700276   | 1.001846    | 0.7552411   | 0.5059812   |             |
| 0.662209505 | 2.335625517 | 0.204261474 | 0.03015296  | 1.292431    | 0.2028438   | 1.00399     |
| 0.6646642   | 0.4870511   | 0.358960609 | 0.4117495   | 0.546219344 | 0.355978    |             |
| 0.328095    | 0.1819243   | 0.3410176   | 0.1004617   | 0.451545108 | 0.2848788   |             |
| 0.284172    | 0.8032596   | 0.3457632   | 0.2459652   | 0.7062343   | 0.5273809   |             |
| 0.712271827 | 1.033829    | 0.252230436 | 0.05220789  | 0.1454028   | 0.523233857 |             |
| 0.8838352   | 0.6070571   | 0.3486927   | 0.598243607 | 0.1491915   | 0.7966606   |             |
| 0.9637801   | 0.363441945 | 0.6840525   | 0.2724244   | 0.06637297  | 0.3204263   |             |
| 0.6537261   | 0.9565409   | 0.188017    |             |             |             |             |
| AL513320.1  | 0.05083118  | 0.716756315 | 0.2888389   | 0.705892315 | 3.326618122 |             |
| 0.830239953 | 0.4147792   | 0.365480883 | 0           | 0.1519318   | 0.101945866 | 0.9234218   |
| 0.4556577   | 0.7079846   | 1.21477     | 2.439737    | 0.53846     | 0.841242109 | 0.1771801   |
| 0.1416426   | 0.13385702  | 0.4854359   | 2.005521328 | 1.22339     | 1.120626    | 0.864043321 |

0.2388055 0 0.2456486 0.5018866 0 0.10081774 0.6962724  
3.912636117 0.3606688 1.436845346 1.359424069 1.2627547 0.4207232  
2.459734 0.472070803 2.560828 0.184481541 0.4293361 0.413592957 2.611714  
2.87987 1.977314 0.355220756 0.1699544 1.657652 4.727523 0.546996232  
1.127494 0.301168058 4.148482 0.2574385 2.468474 0.1582868 0.3450522  
0.1978065 2.861731 5.203821525 0.3299939 0.1038784 0.6385385  
0.516517 0.6809743 1.117468 0.06291501 0.0408856 0.501275822 0.2050908  
0.03076768 0.612523164 0.2973401 0.040252899 1.422607 0.1656771  
1.678348 0.2706031 0.3233835 0.844944 0.084960799 2.705380601 0.2960019  
0.1334437 1.221685 0.615539486 0.1707303 0.04403774 0.1304241  
0.654978864 1.11149 0.9107987 1.386977781 0.06619134 2.264520543  
0.026321574 0.1949213 0.111848245 0.2919923 0.4417767 0.052931439  
1.739416 0.2602128 0.066493336 1.49976 5.120718734 0.298695287 0.1450671  
3.571019085 0.6807656 4.569494 0.8360869 0.4514963 0.5594557  
0.856215074 3.277063 1.020591 0.2004988 0.1910481 0.2017066 0.8987681  
2.06837 0.03878318 0.6298592 2.376143 5.917814 2.65626056 0.862036769  
0.4216994 1.5926065 1.283876158 0.1857163 2.065540844 0.5637794  
0.02856107 0.058052893 2.482880269 0.139084327 0.679681397 0.4006589  
0.2874236 3.294781 2.348731 3.360361 0.1675218 1.072260696 0.4107034  
1.506334 1.235375818 2.725607 0.562838 0.119403242 0.7045951 0.2007215  
0.415239603 1.345705 2.73286 0.182123788 0.9162156 4.292908 0.04460667  
1.379165491 1.751274 1.900712 0.09884081 0.1872683 0.357949147 2.557183  
0.3969451 0.368135991 0.4275586 1.732877903 3.357761 4.659478 0.4464271  
0.7392682 0.07798543 1.379291433 0.2375985 0.6141797 2.518125  
1.219421 0.2672092 0.08833965 1.732343 0.7622611 0.543192531 0.095425682  
3.696934 0.2856412 1.789626 0.6298023 1.134643682 2.811036 1.930027922  
1.068503 2.259102 0.085079278 0.028779897 0.2907938 0.08697038 0.656686642  
0.9062766 0.1251184 0.4591295 0.6073874 0.4774239 0.3102942  
0.8430605 0.07782192 0.0388678 1.444844 2.406033 0.3286276 0.1048175  
1.004544222 0.9598503 0.1610041 0.248338175 0.6162324 0.1586874  
2.408379 1.266316 0.752862 2.322804637 3.298345 0.2443937 1.878856 0.03489033  
0.7632549 0.164181323 0.3370316 3.050577 0.2128796 1.50084105  
0.080125676 2.672349 0.2204304 0.8355495 0.550009517 0.4445669  
1.283264 0.711078328 1.814334 2.568259 0 0.5232454 0.1301081 0.7012293  
1.081324995 0.5287387 0.256984808 0.2718455 6.554434 1.552828 0.3710887  
0.8355185 0.2379054 0.4683982 1.06698458 3.074445 1.675103 0.145732182  
0.1902885 0.1001235 0.5016972 0.5512805 2.482704 0 0.2105399  
4.284037 2.342906475 0.3257853 0.071453774 2.62144 1.349785 0.2020197  
1.543851729 0.971108969 0 1.311207 1.817999 0 0.3495475 0.210694926  
0.4068593 0.694757 0.203345 0.467694061 0.07055713 0.02833713 0.259906678  
0.1049251 0.318757356 0.3098552 1.941754 1.415821328 1.080414 0.26826 0  
1.742198002 0.2938544 0.2755574 2.029348 0.4423561 1.066106 2.059824  
2.645246 2.217839 0.2681718 1.117302733 0.1176344 0.125420078 0.366266  
0.26646097 1.580611 0.2735791 1.008571534 1.306935 0.1087061 0.1666799

0.751889259 0.02981609 0 0.216186886 1.07249859 0.1015372 0.4739339  
0.7304189 2.361610788 0.920942 3.301032565 0.6343958 0.3165120 0.12718  
0.1788279 0.07909668 0.4164139 0.1280413 0.48877 0.08389182  
0.1600793 0.666647454 0.2172276 0.9920887 0.3683139 0.2590213  
0.820669 0.3126485 0.3727517 0.1691273 2.354396 1.13313 1.932778494  
1.954763 0.5133055 0.5960316 0.309965 3.557536368 0.9419797 5.814053  
1.572617 0.1451752 2.208908 0.184754 0.05590082 0.268945316 0.1822705  
0.3186617 0.10854195 0.4331543 1.473671 1.810002 0.5795858 0.5736155  
0.826413834 0.702075315 0.3635643 2.287889 0.3927665 0.035505042  
2.425942439 1.955740872 0.809954 0.6730418 0.1888491 1.329833 0.6307813  
0 0.1940407 3.235597746 3.054688011 0.3535754 1.057598276 0.8289601  
0.697258544 1.781529 1.684447 0.4336375 3.018477 0.8214059 0.2700202  
1.298156 0.4732612 0.2709778 1.229296312 1.929096 0.1525551 0.1762807  
0.4278855 2.549212125 0.5857506 0.2458872 0.6639067 0.862057169  
1.094108 0.5084247 0.2608536 0.2620153 0.284476 0.452479 1.828391  
5.368341496 4.056887484 2.262126402 0.177536 0.25860448 0.10987387  
0.2733199 0.07495273 1.049313942 0.8043221 0.08643572 0.4417866  
0.937984359 0.1716783 0.1785572 0.05316882 0.502239004 0.2342623  
1.128687 0.2522622 1.034572 0.2542465 0.5912148 0.4673284 0.1059056  
1.999059 0.2528951 0.1597622 0.135731987 0.4467374 0.4753637  
0.537601 0.3468742 0.04325241 0.06675034 0.2591814 0.138333159  
0.219630972 0.141280996 0.1036999 1.042568 0.2934554 1.245468 0.7107387  
2.470451584 0.2035155 3.93201 0.09192314 0.0455571 0.634969 0.171646903  
0.5358704 2.791041 2.197934 1.473238 0.7127479 1.607957 3.544934 0.264653488  
0.5159609 0.4141617 0.054566363 0.2889719 0.9742053 1.296817  
2.914584 1.020906 1.213163555 1.330134406 0.97902656 0.05549697 1.357542  
0.2074094 0.1500581 1.084721 0.2006921 0.405675909 0.712247 0.437097655  
0.06066506 0.1867619 0.3348343 1.365338 0.390347 0.490792503 0.7149866  
0.1669221 0.2214848 0.4723148 2.429136 1.077006 0.7091523 1.787654461  
0.2537037 0.121104461 0.1441341 0 0.495010016 4.157151 0.2674382  
0.3056067 1.344825667 0.1664177 3.4536 1.091601 0.359337276 0.2603213  
0.3322538 0.06544308 0.1794889 0.8811258 0.9942372 0.4009093  
AC010761.1 0.3341062 1.76802433 0.744865 1.302380481 1.050739612 0.604659271  
0.6696139 0.866978965 0.07102851 0.2943319 0.282137168 1.661132  
0.7250989 2.430361 1.243203 1.816615 0.784315 0.352750593 0.6304493  
1.469995 0.463064885 0.9545589 2.592583364 1.357497 1.041862 0.78802778  
0.5857968 0.2828835 0.2454968 0.9396047 0.378677 0.2964535  
1.839359 2.36584632 0.9090367 1.280105348 2.000823687 1.502107127  
1.655574 0.7502738 0.865533153 1.092877 0.364683039 0.6832127 0.840585129  
1.234044 1.48093 3.674228 0.393232143 0.3997993 1.162188 2.292987 1.177417671  
0.242097 0.625116347 1.552759 0.2849865 1.474177 0.2464097 0.689678  
0.3558317 1.336905 1.743953119 0.5936219 0.359357 0.9940318 0.3287783  
1.457628 1.335447 0.5223556 0.4243189 3.39390735 0.5853302 0.2128754  
1.059481113 0.3771599 0.863355279 0.9670054 0.3766371 0.3572971

0.5616745 0.3635817 1.152005 0.450667105 3.216329592 0.3640849  
0.1384906 1.922551 1.206658236 0.7593741 0.2894539 0.2105548  
5.041479415 1.30342 0.6633298 1.012934336 0.9388273 1.880131405  
0.40065008 0.3596323 0.27084942 0.5162825 0.9169692 0.292977577  
2.303779 0.420084 0.368043205 0.8502995 1.600029378 1.239967531 0.2007381  
2.739272318 0.5102587 5.440792 2.458505 0.7140142 1.143634 1.160112693  
0.9717146 2.850182 1.171423 0.1817507 0.5272143 1.006788 1.031697  
1.019665 1.006818 0.8375121 1.529782 1.719244608 1.749515929 0.720832  
1.327279449 1.036336076 0.3694184 0.750886268 1.005964 0.2964125  
0.923809436 3.688335455 0.37117149 1.010183581 0.3960112 0.5242742  
1.036178 1.117215 1.479524 2.434004 1.068300845 0.6351754 1.501478 1.579958516  
1.382915 1.033967 0.958307314 2.862069 0.2777504 0.656676391 1.338407  
0.8956473 0.283517509 1.233557 2.158019 0.2314684 0.74216865 0.9362913  
1.216925 0.273543866 0.2591344 1.035659925 1.528 0.8010285 0.23511312  
1.49553 2.642115862 0.7209829 2.330822 1.02958 0.6269814 0.4496379  
0.993255155 0.6210273 0.3035276 2.446966 1.301698 0.2641095 0.1986414  
0.8621317 3.107852 0.87692261 0.110038514 2.495448 0.6521771 4.705183  
0.3210772 0.743719376 0.9854157 1.295287037 1.911298 1.680992 0.32964198  
2.469116706 1.08645 0.4212114 0.908696532 0.9081189 1.333131 1.64437  
1.536046 1.500203 2.057411 0.9301216 0.2422954 0.1479052 4.424022  
3.165248 0.2448609 0.5801689 0.745879331 1.389979 1.420293 0.472505505  
0.4448961 0.5001665 0.9088957 1.28051 0.3217262 1.436938046  
1.905023 0.4919014 1.254331 0.07241976 1.37301 0.302916672 0.349778  
1.407088 0.3273046 0.899948145 0.332624052 0.9572549 0.3812784  
1.566464 1.582247388 1.148324 1.499181 0.562263747 0.6681441 1.798081  
0.3073844 5.902549 0.1980422 0.9934361 2.527523625 0.4813469  
0.43180635 0.8698904 1.897246 1.324224 0.3056533 1.369133 0.4252217  
0.5787059 2.811538333 1.545191 1.515576 0.117634023 2.287537 0.1385468  
0.5592395 0.7179668 3.623998 0.766031 0.4161952 1.365456 1.004569466  
0.4508086 0.609728276 1.439461 1.755067 0.8386402 1.657489544 1.714479828  
1.561821 0.6745831 0.991023 0 0.8291824 0.291551154 0.4155443  
3.190023 0.2286217 1.294352417 0.4393535 0.2548766 0.314692346  
0.2722334 0.392074305 0.4134522 1.415112 0.660150574 0.9634657  
1.441998 7.20603379 1.181283887 0.5760504 0.1747649 0.8752613  
1.577372 0.9300394 1.52943 1.369532 2.007881 0.5798209 1.024277027  
0.1627778 0.225616631 0.3590004 0.202794878 1.266265 0.3217826  
0.681582191 0.9596039 0.3572548 0.876451 0.158326925 0.5157289  
0.5922976 0.116336387 0.623313752 0.3688206 1.639527 0.8198097  
1.069128404 1.111362607 2.192561252 0.3218788 0.503673 0.1722901  
0.2514094 0.2886972 0.6840675 0.4733209 0.1771784 1.444909  
0.7110275 0.3639115 0.115309988 1.728397 0.505773 1.210438 0.3046597  
7.476091 1.189733 0.6167159 0.5683623 0.4654168 0.7236827 1.604700631  
3.459179 0.2731891 1.681251 0.3455166 2.044203417 1.059072 5.159913 1.10257  
1.289029 2.160699 0.219133 0.412551 1.786347352 0.5184494 0.1910789



0.555725124 0.2766376 1.152595 1.313893 0.952384 1.006357 0.515995767  
1.543996714 1.706898 2.055465 1.188894 0.147391342 0.849853535 0.638272516  
0.7773164 0.6984961 1.586596 0.640059 1.125517 0.7154367 0.4602956  
1.714277654 1.482588437 1.46779 1.211929393 5.926588 0.546741701 0.8946321  
0.9711957 0.4421422 2.394726 4.444217 0.4359169 1.12271 0.7304428  
0.3984037 0.746802762 1.716046 0.3166493 0.2787773 0.5693181  
1.840433264 0.7063261 0.4860696 0.8814432 0.769093683 0.5519731  
0.8794221 0.5672208 0.9668432 1.771409 0.3491836 0.9361201  
1.032956377 2.985660858 2.001300617 0.2983101 0.437367903 0.418107352  
1.701941 0.3370789 1.24457004 0.9905599 0.4186219 0.4504512  
1.362842236 0.2036241 0.2470802 0.09196609 0.370654992 0.5788621  
0.4903426 0.3173366 0.8421173 0.3957931 1.145339 0.5850826  
0.6008464 3.175306 1.714736 2.058737 0.281730687 0.2796516 1.82157  
0.7970471 2.899943 0.3142174 0.2463105 0.25404 0.150401315 0.151958248  
0.195498954 0.5201719 1.815767 0.1561814 1.148952 1.953693 1.168352006  
0.4626558 1.660292 0.6359977 0.4097605 0.4224252 0.303495315  
0.5641968 2.256096 0.6190487 1.18312 0.4421219 2.410445 0.9048679  
0.755322232 0.8329603 2.387918 0.830574093 0.2374214 0.5444113  
0.7290088 2.256271 0.792484 1.171204798 1.359524068 1.056695274 0.3071779  
1.093462 0.660111 0.1779809 1.22998 0.447421 1.684073964 0.4927894  
0.504031779 1.448066 2.368975 0.3011646 0.6485654 0.6965046 2.7844695  
0.6925588 0.2117318 0.5938083 0.5675742 0.5538572 1.952829  
1.517943 0.687134517 4.598952 0.432913647 0.7977877 0.07506408 1.619031646  
2.584456 2.014827 0.3964558 0.639689739 0.1727115 1.467222 1.47275  
0.611983326 0.3438484 0.1671852 0.181115 0.4080357 1.240288 1.02345  
0.6569552  
AL133371.2 0.2150816 3.098736188 1.499926 2.20457007 1.300490241 2.449846963  
1.638049 1.435995346 0.2171926 1.350022 1.779371465 1.953634 1.687018  
1.901111 0.642506 1.523907 0.7794463 0.539324461 1.392302 1.738061 1.076137591  
1.513489 0.558286012 0.9767023 1.185424 1.163279103 1.377895 2.076018  
1.039411 0.3122984 0.1736891 0.853178702 1.562343 2.36507256 1.253578  
3.039856481 2.039388315 3.280841368 3.393512 1.231037 0.798987863 4.455766  
1.728461159 0.1362485 2.132852454 0.4043022 0.6586795 0.2390455  
1.202434342 2.013555 2.805604 0.206222 3.086001417 2.714396 0.76459809  
4.028658 0.8714382 0.5497283 4.353425 2.027801 0.4184886 2.690849  
0.774101639 3.909642 0.4944825 2.229021 1.966981 3.061489 2.52536 1.930036  
1.989488 0.454509565 1.735599 1.301871 1.545090483 1.712458 1.277413422  
0.4752211 0.2002938 0.8194134 1.335834 0.4276032 1.314414 1.018566308  
0.725530354 0.2783268 1.458652 0.8615511 2.116178691 0.5676077  
1.257772 2.023495 1.039277687 1.833388 4.107399 0.543398954 2.240599 0.958184883  
0.38980998 1.099692 1.656419241 2.196453 1.001403 0.671905209 2.681134  
0.9175303 1.125411023 3.305168 7.828170943 4.52075551 0.5115179  
2.737323611 1.380248 0.5058541 0.7075457 0.8869774 2.690023 0.905724109  
0.3301479 3.651026 3.346345 0.6062852 2.038868 2.218388 1.170309 0.9025663

0.9190064 1.375332 4.127473 0.997044917 1.499540001 1.207049 1.148656358  
0.905409264 0.5402512 5.1846909 1.694972 0.7251015 0.184229078  
1.313224088 4.035472946 2.396609007 0.2421864 2.874592 0.7799262  
2.639825 0.1762645 0.118139 3.992602819 3.373389 7.291991 11.325678988  
6.765933 0.7801571 1.313598121 0.6732077 2.813344 0.815750104 2.402186  
0.9889862 2.937985015 1.571666 0.3547764 0.7077896 4.322705646  
1.908676 3.961216 2.404790188 2.4564 2.134191544 1.229567 1.399659 0.479289558  
2.211153 1.561511166 2.939518 0.9256157 0.4722409 1.715388 0.4949688  
0.476423308 1.45217 2.877214 1.017605 4.201493 0.7268402 1.121373 2.314753  
1.324697 3.830677485 1.27861759 3.243021 2.175537 0.2065208 1.823338  
2.484732894 0.07929545 4.450749423 0.8821754 0 2.879962488 2.739963692  
0.6767385 0.1226657 2.589181005 1.454549 1.641179 1.19991 3.456252  
2.062206 1.477064 2.506706 1.317149 0.7811899 2.406401 1.218808 2.299705  
1.275101 2.3844383 0.6611593 1.021883 5.516655183 1.247046 1.193694  
3.771829 0.2060829 0.4684675 0.462516041 0.7281529 1.974194 1.603946  
0.4428936 2.664383 1.38939841 0.5704317 1.572114 4.904115 2.593119814  
1.356140693 0.6816572 3.35774 2.623079 1.408599382 1.818389 1.37972  
3.33114974 2.724088 0.5174789 0.7740576 0.04813053 1.101051 2.331298  
3.771615458 2.296123 1.009708046 1.797278 2.546975 2.674028 0.9346339  
0.3721393 1.593858 0.5662656 0.960579547 3.190856 0.8178289 0.513862909  
0.7548434 0.9743989 3.007339 2.847179 1.537324 3.832998 0.6363257  
0.4582672 0.488694778 0.4386114 1.864441225 1.672615 1.477069 0.6105746  
2.646784039 0.212536868 2.653206 2.347274 2.447609 4.5894 2.324202 0.891511863  
0.9017594 9.888149 2.043478 2.96842557 2.487899 2.877665 1.237208831  
2.885797 2.697511228 2.24758 1.205032 4.03724739 0.4063597 1.222401  
7.86956314 0.884609925 2.797613 4.615274 2.676394 2.375668 1.716144 4.198426  
1.522831 1.197999 0.9928742 2.836580816 1.617673 2.388100677 0.2582964  
0.450989723 0.4106683 1.157593 1.240570111 2.200724 1.322406 1.904233  
2.282354176 4.415622 4.358059 2.337694328 1.089133262 1.342605 1.731896  
1.407947 1.912176838 0.815604069 1.606277955 3.1317 0.6696274 3.160996  
2.613803 2.333075 1.673406 1.258549 2.004587 2.820176 1.597369 3.725384 1.674838354  
1.562561 0.6628133 1.519483 1.808391 7.957791 2.645814 3.46303 2.30023  
0.4743875 4.425787 0.817815118 1.670141 0.668291 2.230986 3.898226 2.678919638  
0.7473359 1.352409 4.56922 2.354735 2.309776 1.451818 2.207639 2.219073289  
2.95642 1.258461 0.826690931 0 6.913309 3.013238 2.248031 1.256909 1.57782379  
1.644486908 2.582225 1.806106 0.8655782 1.802786613 1.169415808 0.390344892  
1.824129 2.847837 1.997689 0.7951074 1.545222 0.6332755 1.172919 1.911772867  
1.253944931 1.645689 2.167581841 11.69191 1.770182915 1.033459 1.781847  
1.158851 2.469265 1.251219 1.675717 5.664529 0.8472143 1.28991 2.727622296  
0.8745611 2.452919 2.077851 1.462334 1.797743698 2.336855 1.189052 4.365623  
0.767919168 0.3857911 1.466791 0.8672304 0.3695544 2.206785 2.798219  
3.404042 0.268816843 0.929362803 1.647590892 0.8048642 0.972649956  
2.266428859 1.084216 2.061455 2.537116703 1.531495 2.560144 1.475786 2.18288741  
0.6745337 0.3022111 3.824538 1.77093345 0.6372209 1.166185 3.638847

0.6437614 0.4706588 1.000641 1.129945 0.8514233 0.5956764 0.802555  
3.168752 1.722965219 0.04500658 0.3868082 0.4874458 5.442818 1.143835  
0.5648804 0.5026414 0.459900618 2.220049122 0.597801222 1.864834  
4.107176 1.480483 2.342195 1.463032 3.241816213 1.660758 1.039843 2.061455  
2.409567 1.291702 1.210480427 2.218132 0.4092474 1.028773 3.951721 0.6239679  
2.504153 0.6553246 1.60975034 0.6237662 3.431861 1.731646822 0.8406232  
3.091611 1.757623 3.061554 1.000918 1.730979608 4.285097499 0.414254776  
0.05870597 3.643681 1.316415 3.083993 3.251088 2.028613 1.348704845 0.3013725  
0.693558014 3.208645 0.7243907 0.4958736 0.3449041 0.782371 1.384457763  
0.9075953 1.118303 3.631522 1.262212 0.7007989 0.2357134 1.969164  
0.653686699 0.2683737 2.092415962 0.6098734 0.3825545 1.428090119  
1.274647 1.697414 0.9698334 3.067454717 1.584364 1.08958 2.424913 1.87133677  
3.604895 1.853183 0.3692118 2.386906 1.028497 0.7695564 1.562441  
SEMA3B-AS1 11.9733 0.688174573 0.09664218 0.185572705 0.798491049 0.281443846  
0.3053168 0.62453052 1.227974 0.1677542 0.75041809 0.637243 0.7127403  
1.252749 1.769743 0.2137949 0.0521523 0.187646617 0 0.4170496 0  
0.1880667 0.582731672 0.5946903 0.4511101 0.578197897 0.1198524  
0.4514418 0.2511398 0.7062748 2.064742 0.092764252 0.427102 0.24202274  
0.09481657 0.108663104 0.40936288 0.040767851 0.2419469 0.2433598  
0.260616603 0.264254 0 5.530561 0.237846541 2.403086 1.074252 0.4158543  
0.043579351 0.1251025 0.1626918 0.7175061 0.111844726 0.3577337  
0.554220509 0.1251506 0.2368739 0.478166 0.03641064 3.457101 0.2184065  
0.3150755 0.673331012 0.3036334 0.2389511 0.2350124 0.03802054  
0.5874159 0.4206285 0.4052248 0.07523918 0.461233079 0.3774157  
0.2264793 0.433533692 0.03039867 1.518534654 0.964502 0.4355502  
12.98778 0.08299563 0.2975511 0.2743936 0.781739892 0.350601453  
0.9078559 0.5729921 0.5289858 0.188789724 0.3141842 0.8914386  
0.04000186 0.80354409 0.2426751 0.3969675 1.937908579 0.3654232  
0.555633837 0.14531378 0.1195671 0.411654486 0 0.2322782 0.487031882  
0.3200937 0.1064118 0.122363477 0.3449891 0.851139888 0.126846929  
0.6673947 0.57143655 0.1565962 1.417788 0.07692989 0.2373886  
0.09359372 1.378683591 0.2153776 1.092729 0.1229884 1.098668 0.04124309  
0.3150374 0.6196286 14.48816 0.7594038 2.970112 0.7180337 0.315364396  
0.141009039 0.3195404 0.399650851 0.246107917 0.5553632 0.515401226  
0.1638138 1.471656 0.213662126 0.201577384 0.47533215 0.324274907  
1.474614 0 0.2119992 1.080555 0.2555314 0.4624197 0.118392808  
0.2222916 0.09396648 0.688904213 0.1337536 0.1428628 0 0.8783567  
0.04617189 0.545813679 0 0.1985175 0.083787719 0.136707 1.172651 0  
0.516998153 0.146489 0.1044108 0.454726213 0.0344618 0.179648496  
0.3743267 0.1217455 0.052112104 0.1748465 0.295269027 1.562525  
0.8453774 0.1825626 0.04388479 0.4783722 0.518004632 0.1943277  
2.09901 0.3124008 0.2564599 4.074319 0.1625659 0.2796422 0.5510768  
0.142800403 6.614486697 1.493393 0.05256475 10.29916 0 0.366318058  
0.4828107 0.852409965 0.383668 0.784393 0.156566008 0.105923646 0.1070259

|             |             |             |             |             |             |                      |
|-------------|-------------|-------------|-------------|-------------|-------------|----------------------|
| 0.3200922   | 0.109859895 | 0.5750908   | 0.04604951  | 2.087417    | 0.9250234   |                      |
| 0.4758937   | 0.6185994   | 0.2515834   | 0.6444484   | 0.2145779   | 0.5091426   |                      |
| 2.369739 0  | 0.8680005   | 0.045087784 | 0.1232338   | 0.2222142   | 0.228500511 |                      |
| 0.3451345   | 6.489388    | 0.05755827  | 0.05975184  | 0.1629934   | 0.201153426 |                      |
| 0.7917047   | 0.3270853   | 0.1819758   | 16.18003    | 0.4213709   | 0.402843326 |                      |
| 0.1240436   | 0.9356305   | 0.1305829   | 0.230158563 | 0.147450209 | 0.1743885   |                      |
| 0.5679018   | 0.1984011   | 0.053270931 | 0.2727028   | 0.8904053   | 0.794478259 |                      |
| 0.3769617   | 0.6189078   | 0.288554    | 1.800196    | 0.09577187  | 0.1843468   | 0.161342751          |
| 0.1536323   | 0           | 0.1563312   | 0.2461573   | 0.5980963   | 0.1625931   | 0.1618476            |
| 0.03648352  | 0.4309818   | 0.041776684 | 0.5871204   | 0.5532847   | 0.044696951 |                      |
| 0.7003518   | 0.03685018  | 0.5129119   | 0.08951352  | 0.7243162   | 0.4321887   |                      |
| 0.05534904  | 0.2657407   | 0.242901546 | 0           | 0.175322476 | 0.3828626   | 0.2141313            |
| 1.433947    | 0.195934661 | 0.616231155 | 4.154073    | 0.3093502   | 0.3041408   | 17.6197              |
| 0.1378393   | 0.258485688 | 0.03565321  | 1.162288    | 0.09355071  | 1.219279339 |                      |
| 0.6924897   | 0.2085881   | 0.159429935 | 0.2896305   | 0.065176553 | 0.4887488   |                      |
| 0.1905753   | 0.339840828 | 0.5301912   | 0.2278439   | 4.79158608  | 0.448847935 |                      |
| 0.6308885   | 0.2535454   | 0.2909985   | 1.502843    | 0.1705989   | 0.6009431   |                      |
| 0.2980334   | 3.907674    | 0.1850623   | 0.257012685 | 0           | 0           | 6.234649 0.343245876 |
| 1.735013    | 0.4027602   | 1.079075777 | 0.5889967   | 0.5001123   | 0.1226922   |                      |
| 0.240635513 | 0.4389494   | 0.09846071  | 0.309427253 | 0           | 12.56583    | 0.2775025            |
| 0.1493493   | 0.912107257 | 0.394128199 | 0.911202184 | 0.2334877   | 0           | 0.07637515           |
| 0.1337379   | 0.274238    | 0.4366698   | 0.2736786   | 0.7068789   | 0.5723788   |                      |
| 0.578928 0  | 1.456812059 | 0.119925    | 0.6726182   | 0.1355569   | 0.04766604  |                      |
| 1.258521 0  | 0.08947191  | 0.04446204  | 0.2475797   | 0.8020102   | 0           | 0.9684839            |
| 0.5086327   | 0.2531167   | 0.158447    | 1.497975774 | 0.8667328   | 0.8962708   |                      |
| 0.2701055   | 0.3116828   | 0.3737852   | 0           | 0.1028707   | 0.395938429 | 1.49076              |
| 0.1172826   | 0.239691453 | 0.06131588  | 0.2358177   | 0.7644532   | 0.5777282   |                      |
| 0.1884979   | 1.149870944 | 0.599850063 | 1.242511    | 0.1256793   | 5.0896      | 0.784052166          |
| 0.113020463 | 1.290216904 | 0.4808087   | 0.2381839   | 0.1985868   | 0.8512028   |                      |
| 0.5498464   | 0.3505328   | 0.3060693   | 0.268210166 | 1.67801461  | 0.1301325   |                      |
| 0.121639447 | 1.144112    | 0.085541383 | 0.26439     | 0.4520514   | 0.1679991   | 0.07406283           |
| 0.2720846   | 4.472109    | 0.4479214   | 0.2679731   | 0.4986633   | 0.331053098 |                      |
| 0.9297602   | 0           | 0.1390278   | 0.7874107   | 0.475914141 | 0.1847863   | 0.9049811            |
| 0.1981209   | 0.125241255 | 0.1677849   | 0.2551696   | 0.3428802   | 1.767957    |                      |
| 0.2617516   | 0.03202571  | 0.06729345  | 0.467645868 | 0.808380663 | 0.06824341  |                      |
| 0.2800356   | 0.317262301 | 0.202193926 | 0.3143584   | 0           | 0.315263022 | 2.042598             |
| 0.1590622   | 0.04278905  | 0.575371076 | 0.135398    | 1.380067    | 0.5381376   | 0.123231819          |
| 1.539636    | 0.2898212   | 0.2532121   | 2.295829    | 0.05848423  | 2.828735    | 0.2457128            |
| 0.2338696   | 0.3626929   | 1.861548    | 0.3307503   | 0.099911593 | 2.93608     | 1.009363             |
| 1.319084    | 0.1063884   | 0.1989867   | 0.2866183   | 0.07949251  | 0.072733072 |                      |
| 0.179632432 | 0.051998094 | 0.09541614  | 0           | 0.04154056  | 0.1697745   | 0.3181445            |
| 0.460376267 | 0.5350239   | 1.010888    | 0.1014962   | 0.08383584  | 0.8089568   | 0                    |
| 3.258511    | 0.1017065   | 0.1431759   | 0.7261892   | 6.196297    | 0.2876827   | 0.3166756            |
| 0.182634397 | 0.2712829   | 0.4445908   | 0.050207511 | 0.1329442   | 0.4826684   |                      |

0.4847477 1.012693 0.6415104 0.155756378 0.22252383 0.072065624  
4.340421 0.410152 0.2290094 0.1183467 1.05352 0.9438201 0.799863955  
0.2097125 0 0.1674571 0.1145621 8.010266 1.200021 0.6049101  
0.421481372 0.1754326 0 0.3566364 0.09149169 21.74135 1.025144  
0.2854705 0.203068353 0.6536249 0.111430436 0.1326204 1.46412  
0.248436979 1.773946 0.05468329 0.1405971 0.154674846 0.07656197  
0.111499 0.1506603 0.559532463 0.3919523 0.1111683 19.99151 0.3303021  
0.1118262 0.5801272 1.320217  
AL049552.1 0.08219322 0.201562397 0.3113654 0.217412736 0.857536026  
0.471047387 0.8346383 0.73168567 0.0553333 0.196537 0.137370729  
0.8461233 0.1964777 1.291569 0.3819403 1.001909 0.2138516 0.741968383  
0.4092821 0.5191436 0.288592951 0.495753 1.137858493 1.244153 0.717264  
0.635065715 0.5382625 0.484824 0.2353837 0.6046789 0.7375014  
0.407551784 1.546638 0.779757841 0.6942808 1.315507797 0.319733457  
1.504524482 0.8787245 0.76981 0.661553642 1.00618 0.142049416 0.8330758  
0.58517669 0.7210172 1.006855 0 0.178697998 0.03664181 1.215113  
1.418536 0.950001736 0.5029352 0.259724828 0.8797417 0.5827837  
0.5041875 0.1066447 0.1239876 0.1705867 0.6064365 1.665369443  
0.177865 0.1119799 1.652011 0.200448 0.9864244 1.423641 0.4069304  
0.8374108 1.350925309 0.1381786 0.1990035 0.431730432 0.3739511  
0.130176619 1.56046 0.2551403 0.09278165 0.6320326 0.3050286  
0.8572619 0.274760572 1.150118597 0.2481787 0.3116771 0.5422792  
0.663545165 0.3155066 0.1186806 0.07029789 1.765151011 1.401255  
0.9043185 0.221503352 1.213011 1.546048745 0.25536945 0.1751026  
0.180856867 0.4196862 0.4422142 0.057059541 1.044683 0.685683 0.322556062  
1.032908 1.994352043 0.718286306 0.02606348 1.227383648 0.1834646  
1.346022 0.4957112 0.2433542 0.3837829 1.038364814 0.6308286  
0.5400913 0.2881809 0.1544609 0.3140765 1.014999 0.3629713 1.17062  
0.6087422 1.256564 2.313388 0.923684278 1.713980753 0.1337022 1.170554486  
0.547835371 0.4504505 1.924715409 0.2239073 0.1231542 0.46935311  
0.984014379 0.364119255 0.976919304 0.9255131 0.6478466 0.9686562  
1.463759 0.6586245 1.053423 0.647296093 0.8594249 1.018323 1.129946182  
0.4701081 0.4812024 0.360403271 1.445588 0.2434227 0.351704551  
0.9973257 0.3101047 0.319032268 1.201221 3.976938 0.1682994 1.789577662  
0.6578889 0.978602 0.266373414 0.121124 0.982202985 1.002406 0.3565856  
0.641060167 0.2816634 0.588081743 0.4160496 3.890955 0.0802073  
0.1542432 0.05604499 1.244108872 0.1707524 0.1418741 1.281006  
0.9765031 0.3291986 0.09522923 0.8518183 0.8510563 0.808624814 0  
0.7776109 0.8005875 1.157519 0.2143959 1.051466148 1.252511 0.936247514  
0.6180579 0.5513861 0.311829561 0.71356189 0.06269454 0.2187574  
0.579192031 0.3368816 0.1618517 0.5531647 1.332092 1.565418 0.8641094  
1.400059 0.04194561 0.1047477 1.093583 1.863065 0.08175165 0.5084647  
1.162123949 0.8181417 0.2603411 0.167316232 0.3177049 0.3421268  
1.146377 1.330074 0.2864391 1.207792106 0.5256078 0.8622128 0.5329968

0 0.3702514 0.176985759 0.03633165 1.264804 0.3569719 1.159488582 0  
1.409736 0.1900973 0.9588242 0.904959561 1.66136 0.657656 0.328515019  
0.2208198 1.384278 0.2535475 2.305261 0.1683062 0.395957 0.882118887  
0.5699749 0.158301115 0.3479928 2.595531 0.3114293 0.1904904  
0.5688507 0.3205744 0.6131273 0.31813995 1.688376 0.4167101  
0.078548888 0.9230806 0.1942777 0.9915112 0.419488 0.3590198  
1.229689 0.3242283 1.608568 0.284577895 0.06385331 0.308105702 0.8073956  
0.7275269 0.4355503 1.377315401 0.397079278 6.218711 0.7973408  
1.454991 0 0.4306384 0.227126939 0.2923934 9.055375 0.08220141  
0.504169334 0.1521197 0.0916414 0.140088348 0.08483113 0.839952947  
0.190869 1.116368 1.094911784 0.4399882 0.6450971 0 0.976597092  
0.158386 0.321802 0.8807285 0.8436671 1.049317 0.8123668 0.5431519  
0.6358529 0.2890864 0.270999164 0 0.243362773 0.09870773 0.086172646  
1.434848 0.08847463 0.353981739 0.3162752 0.117184 0.3593585 0.140961531  
0.3535558 0.1441929 0.077682405 0.971159555 0 0.5573409 0.9448608  
1.131463054 0.900415583 0.854034907 0.09118294 0.409436 0.581616 0.1762698  
0.2249037 0.1918471 0.2565085 0.02760544 1.293273 0.2486949  
0.6409515 0.718639024 0.3746705 0.6473055 0.8933367 0.1675333  
13.27009 1.600901 0.7861744 0.3906803 1.377779 0.4698084 0.267880515  
0.6483735 0.1702579 0.5683794 0.3898289 0.552498158 0.4231018  
0.9516082 2.282957 0.1825802 1.231645 0.08535553 0.1406078 0.608832533  
0.1309905 0.1145047 0.234014186 0.1077544 0.8979056 1.311438  
0.2342953 1.060031 0.130370564 0.621681695 0.4759011 0.8466475  
0.3351903 0.153096263 0.92688532 1.272916723 0.3098175 0.1116203  
0.3780722 0.1869843 1.825198 0.1173361 0.1792919 0.785572235  
0.245740441 0.2668055 0.712549965 14.59564 0.100218328 1.084136 1.891475  
0.3936478 1.041244 2.001155 0.3492947 1.865865 0 0.4746808 1.228205082  
2.228085 0.8222638 0.2714697 0.4967374 1.11514024 0.2345323  
0.4165288 0.4448849 0.342369508 0.2948594 0.1245629 0.2410264  
0.09414992 1.277759 0.3001647 0.1970987 1.540921502 1.281343923  
0.919452803 0.1640416 0.340722482 0.207275056 0.7734197 2.100755  
1.154234202 0.8323689 0.4192956 0.225588 0.505568693 0.8195841  
0.3079724 0.1146309 0.21656337 0.1443042 0.9620522 0.07416437  
0.3280171 0.3083345 0.8497645 0.1919143 0.3653284 1.12301  
0.7360695 0.8826376 0.351162409 0.5045105 0.157673 0.800301 0.4050873  
0.3730052 0.119927 0.1629803 0.042606202 0.26306656 0.274139 0.2515216  
0.3487896 0.1703379 0.09945194 1.159607 0.842759847 0.1880465  
0.6544999 0.1387291 0.2946604 0.1842858 0.185033576 0.7283573  
1.519251 0.356451 0.5955507 0.344426 3.057457 0.5565148 0.855881124  
0.1854002 1.00454 0.529397746 0.07787718 0.5250916 0.8081928  
1.516017 0.6978947 0.486614957 1.62939893 0.084430436 0.08973773 1.28868  
0.4471703 0.2310872 0.649621 0.2884586 1.062049286 0.2149826  
0.157062242 0.09809446 0.1342183 0.5414218 0.9665683 0.132881  
1.269766115 0.1541496 0.1799403 0.8654988 0.4823531 0 0.9207939

0.3105614 0.356865356 0.574329 0.478680948 0.155375 0 1.382549637  
2.955104 0.1281314 0.4529811 1.200539507 0.1569719 1.143009 0.9413874  
0.357564782 0.3316462 0.1953633 0.04703131 0.1105641 1.080857  
0.6273819 0.4321761  
AC080162.1 0.09658959 0.750077581 0.2993742 1.107137088 0.320643215  
0.636585527 0.315266 0.396850351 0 0.07698701 0.16143159 0.5264069  
0.692674 0.8968766 0.4488382 0.5298282 0.394913 0.258348499 0.4489044  
0.3947531 0.712195679 0.3883903 0.869152399 1.023449 0.6210803  
0.547286095 0.6600424 0.207179 0.1728824 0.6357912 0.2080024  
0.60665176 0.2940132 0.624773571 0.4895316 0.847764009 0.751471302  
1.12256894 0.7661489 0.7706229 0.62792147 0.9095505 0.166929762  
0.4351072 0.523940568 0.8069575 0.6409046 0.2862704 0.179997809  
0.1722389 0.8119681 1.08046 0.692936163 0.5417736 0.343368389  
0.8615257 0.260899 1.020412 0.3509066 0.1457043 0.2505818 0.5577304  
0.412013364 0.4598408 0.3289836 0.2426706 0.340249 0.4043718  
1.093881 0.1195513 0.8804977 1.065922126 0.3572382 0.1559063  
0.537193275 0.2301879 0.025496235 0.4426364 0.6596235 0.3816141  
0.5713345 0.3584552 0.787042 0.035876182 0.868863234 0.08332798  
0.1408724 0.09103727 0.324902885 0.4634605 0 0.330443 1.313737307  
0.5727613 0.576901 0.39045041 0.5450338 0.286870016 0.266753876  
0.2469268 0.070844815 0.08219924 0.1998728 0.469375737 0.9128769  
0.2197588 0.294818723 1.16105 1.42294146 0.320174393 0.2450286  
0.622838684 0.4311978 0.7740632 1.006199 0.3268324 0.2899308  
0.813491511 0.5436346 0.7052109 0.2539924 0.4537878 0.454262  
0.5692808 0.6702878 0.2456531 0.3026544 0.5395468 0.494288  
1.519658167 1.092030286 0.3770893 0.596084806 0.271069576 0.2646741  
0.753944868 0.4510719 0 0.330936958 0.647565634 0.226533041 0.510235292  
0.07250795 0.2648065 0.8172547 0.3719222 0.8091655 1.308672  
0.624837536 0.3672565 0.6468568 0.142270646 0.6445237 0.81135  
0.484033022 1.209306 0.7310393 0.150293298 0.6392782 0.5921832  
0.317232932 1.192033 0.4248646 0.4520627 0.485313949 0.5714365  
0.3593771 0.156514725 0.2846783 0.371005244 0.1104356 0.08380851  
0.430482067 0.4513602 1.707388638 0.6355983 1.1639 0.2827675  
0.2114693 0.03293071 0.392248721 0.5685372 0.0555746 1.182797  
1.235813 0.1934293 0 0.962516 0.6897387 0.884722661 0.16118065  
0.3426793 0.7960722 0.4534205 0.3359306 1.159982314 0.2848822  
0.953535994 0.7593266 0.7019598 0.280224456 0.94791955 0.03683783  
0.2203486 0.529385973 0.3562986 0.6023013 0.5131998 0.5571806  
0.8064023 1.932651 0.2597816 0.492925 0.1723324 0.8567513 1.159087  
0.3202356 0.5975237 0.682836577 1.159385 0.6628712 0.235946556  
0.3054697 0.3350427 0.8716972 0.4935915 0.140254 1.03854162  
0.145334 0.3095986 0.4175684 0.1325975 0.6768253 0.138656868  
0.1280857 0.2972675 0.2696764 0.8555711 0 0.7683037 0.4467868  
0.5121659 0.91678079 0.6007236 0.3997481 0.386055328 0.5560651

0.6971737 0.06621267 0.6340291 0.6922492 0.2115045 1.147691339  
0.3525303 0.372055981 0.5380852 1.440346 1.006437 0.2014698 0.4456577  
0.8287927 0.6781348 0.287586952 0.6981091 0.4352871 0.123075923  
0.8437028 0.05073467 0.2471588 0.5545827 0.1534193 0.340017  
0.6477303 1.250046 1.170478735 0.1875935 0.422416474 1.42322 0.7959928  
0.4021585 0.741838158 0.127262402 5.083781 0.4259078 0.942155 0  
0.284662 0.311393655 0.2454335 8.96122 0.2575979 0.938086967 0.3277338  
0.1435902 0.219500277 0.03322985 0.314068687 0 1.771069 0.701830142  
0.5170534 1.045638 3.76969705 0.926948689 0 0.1454487 1.068377  
0.9052257 0.6165536 0.8910114 0.5698986 0.5081125 0.2123254  
0.42462055 0.1490196 0.381317909 0.03866555 0.135021363 1.018725  
0.1386283 0.356556526 0.2703067 0.240991 0.08446022 0.041412833  
0.1510844 0.06777947 0.15214782 0.923877808 0.09647069 0.3274803  
0.4112429 0.517082969 0.976731553 1.003621469 0.2678847 0.2405749  
0.05257597 0.299208 0.6418621 0.3256496 0.1883979 0.09732181  
0.7880409 0.2391173 0.4055778 0.316691484 0.6329242 0.198439  
0.7698585 0.262503 16.72064 2.871463 0.3900805 0.5815381 0.7953478  
0.2944516 1.958758815 1.28577 0.3001185 0.8131354 0.1308882  
0.76384674 0.09944185 1.5039 0.9828164 0.09195414 0.9005863  
0.3009173 0.3068663 0.749541283 0 0.4575056 0.522504587 0.2110465  
0.9740088 0.639009 0.7036282 0.5449932 0.663889748 0.667043044  
0.3947693 0.7786488 0.4560945 0.269867242 0.62241819 0.607697832  
0.297886 0.6558546 0.8202324 0.842318 0.8411319 0.3447195 0.2106954  
1.070874152 1.097373709 0.1791641 0.753619545 13.47665 0.176657765  
1.019221 0.8446535 0.6649821 1.274605 0.8948807 0.4788871 0.5824296  
0.09223515 0.2145471 0.227893986 1.280077 0.5411199 0.0957055  
0.4169588 0.795636501 0.6148251 0.2224932 0.6591924 0.68971966  
0.433131 0.5562455 0.1888285 0.4425621 1.081125 0.6613864 0.2316211  
0.885288869 0.720153182 0.892584883 0.128516 0.364000875 0.382768339  
0.9954468 0.3798012 0.461176509 0.529837 0.3558652 0.0589112  
0.55451241 0.03106892 0.271436 0.168386 0.254495039 0.1271846 0.3657689  
0.2324119 0.4240172 0.2415601 0.649092 0.3946752 0.2951552  
1.319708 0.2242577 0.9613388 0.309502102 0.2694895 0.509547 0.5513135  
0.5126579 0.1917729 0.2536785 0.1915268 0.250343977 0.154571696  
0.393745245 0.3284181 1.229643 0.6291153 0.7012273 1.289713 0.475378345  
0.4787973 1.24527 0.3726351 0.4039829 0.0618754 0.241603018  
0.2066041 0.8401658 0.6406466 0.4665753 0.2802137 1.103356  
0.4359933 1.005791056 0.2489983 0.6558264 0.38018641 0.3431909  
0.2847982 0.5647162 0.7229486 0.5046972 1.536838556 0.804212906  
0.198437318 0 0.5903576 0.5254935 0.488813 0.3053616 0.19774  
0.477203288 0.1082732 0.230715157 0.07685065 1.419543 0.2969182  
0.4388571 0.07807776 0.455940571 0.5434481 0.5991292 0.5611549  
0.6928027 0.1398743 0.4704667 0.814135 0.698952173 0.8034813  
0.383538567 0.213021 0 0.598576266 1.25933 0.4140783 0.2903575



1.171244553 0.2108183 1.151323 2.177977 0.35016103 0.2997961 0.2678454  
0.1105379 0.09744728 1.000742 0.70655 0.347492  
AL512791.1 0.4742549 3.165985356 0.9799517 3.763414456 0.899633249  
1.947859454 0.8599755 1.840283266 0.1064244 0.1890031 0.369893583  
2.776114 2.03117 4.234292 2.151324 3.468609 0.9401322 1.162783538 1.049581  
2.701786 1.831699457 3.813993 3.282721752 5.455859 1.452145 1.628590744  
2.295573 0.339083 0.2829508 1.591473 0.510646 1.410944278 1.399859 2.931298756  
1.6024 7.427243862 1.691123542 2.70997497 2.616898 3.893433 1.076636145  
4.664377 1.092833507 0.4450784 1.286274095 2.113153 1.533077 1.52272  
0.245497012 0.493321 4.994911 1.869402 1.575146556 1.773405 0.437095242 3.24307  
0.6938826 2.047188 0.3692039 1.828266 1.066309 4.209109 0.758619607  
1.026281 0.4845929 3.044977 0.6425471 1.632494 4.791737 0.7826628  
2.204007 9.316688561 0.2126108 0.1275833 1.221119898 1.575462 0.250373031  
1.655882 0.8832958 0.3569001 0.1870168 0.7542921 1.494225 0.763325574  
4.898136033 0.3409503 0.3688978 0.893986 3.350073651 1.466492 0.4565246  
0.4506876 1.980401371 2.890376 1.689611 0.958555756 1.166512 1.565035308  
0.927747753 0.4041368 0.17392402 0.7399301 1.177651 0.548722588  
4.430706 0.5395078 1.033971378 2.591252 3.698810771 1.572056271 0.3509013  
3.380047195 0.705727 1.982948 1.906836 0.8023734 2.899845 2.884731286  
1.213294 4.886093 0.5080789 0.2475664 0.9293444 2.218388 1.645557  
0.6432836 1.891315 4.322338 2.696615 2.931312057 5.71932662 0.8743235  
1.275774328 3.493747996 1.107024 2.032398833 1.291945 0.2368665 0.240725995  
3.709471806 0.453149983 2.5574481 0.5933567 1.787775 1.671967 0.9891581  
4.145742 5.267817 2.667784611 1.65296 4.128887 2.483729322 2.260437 3.098456  
0.891225802 3.864212 1.976773 0.676445086 4.795474 0.6709891 0.424803735  
6.006907 3.129127 0.8323605 2.224032055 2.31062 2.293904 0.461092379  
0.2329618 3.6432715 1.084478 0.7544162 1.056833475 0.4924842  
5.788454002 0.9602424 4.03661 0.7199051 1.137201 0.9162422 1.283960815  
0.9852416 0.3638284 7.215417 5.851132 0.3165793 0.3663151 5.10403  
2.878625 2.627844755 0.065949749 1.495605 1.421351 4.654979 0.8247096  
4.209727119 1.010224 4.961973119 3.67426 1.679124 0.811429431 3.997911467  
0.6632037 0.7813805 4.641580582 1.684633 1.504591 1.903857 3.734525  
1.567277 6.433434 2.031396 0.08067539 0.3223436 2.230799 3.021209 0.2096476  
0.6519648 2.184352825 4.998364 2.253252 0.386165863 0.8332534 0.8408083  
2.723657 1.952292 0.9181964 2.662936108 2.854359 0.7370323 1.708551 0  
2.215475 0.056733768 0.1397558 0.4865279 0.1471234 3.111743777  
0.66450894 3.104347 1.005457 1.061777 6.181913982 1.843471 2.398933 1.158380458  
2.123551 1.331214 0.4876563 3.254587 0.3776604 1.315417 5.574571307  
2.538688 0.228349358 1.056799 7.973447 3.21953 0.8060282 3.008746 2.466286  
1.248616 1.976872707 3.788528 2.760627 0.402868521 2.416505 0.5397323 1.21355  
2.823853 1.820448 0.5564945 1.309558 4.94012 2.941942563 0.6754616  
1.481474919 2.070521 2.557299 1.436072 2.42828357 2.430004856 6.413684  
1.115311 3.312431 0 1.087093 0.364034011 1.004232 5.761851 0.3162014  
1.454528529 0.8777307 0.2937616 0.404154885 0.7070203 0.660890251

0.4129928 4.99212 2.169694887 1.742267 3.123234 0 2.745239466 0.304629  
1.333086 3.169297 5.07961 1.874029 2.39576 3.693627 0.8805291 1.042518  
1.795319275 0.1829215 0.260037629 1.20237 0 2.58721 0.6806648  
1.750692541 0.442402 0.3944219 0.2073498 0.948906039 0.8036431  
0.6655944 0.348621372 2.668376491 0.1052602 0.3573174 0.8749878  
1.390337611 3.063952617 3.69583606 1.052251 0.9187288 0.6023453  
0.3390256 0.8033345 0.737972 0.3083446 0.4247557 3.040149 0.6522589  
0.6163817 1.123023191 4.413775 0.3247785 4.009096 1.396297 19.1421  
1.296449 0.8736435 1.051972 5.299857 0.9638381 4.637011717 1.247038  
0.08186565 6.416509 0.3927372 2.875373745 0 5.932566 2.695396 0.2508304  
5.316783 0.5472238 1.120377 1.895885179 1.301682 0.5725997 1.48528804  
0.2763302 1.726972 4.675541 0.8511862 2.251168 1.880595382 1.767558186  
1.615264 5.309952 2.951968 0.294455147 5.093455518 0.765075989 0.7042245  
0.8587323 1.510253 1.018961 4.955949 1.015544 1.14946 4.230568344 2.07961944  
0.1466159 4.385507518 9.73936 0.289129876 1.906428 1.74621 1.277633  
5.507312 2.452389 0.9703925 1.850413 0 1.053426 1.554110378 3.42828  
1.771266 1.096466 1.433087 3.906575219 2.7759 0.3641472 5.282783 2.116577206  
0.9451882 1.006219 0.5408364 0.543245 4.472752 0.8659753 0.6065383  
1.383062655 4.553877734 6.074118423 0.4732601 1.370220626 0.455610314  
1.983392 0.932412 1.820381234 0.6336986 1.478483 0.337463 2.398530227  
0.3050968 0.4442503 0.7716568 0.416523547 0.4857039 1.523815  
0.4279284 0.5677976 0.3953534 0.9806283 0.9227881 2.854509  
4.203093 2.307078 2.691327 0.393984713 0.3087451 3.108391 1.380013 0.4195251  
0.6725749 0.4151871 0.806054 0.368756677 0.556561152 0.644429717  
0.6987642 3.577806 0.5616284 1.338955 4.460622 3.306652538 1.145308 5.09523  
0.7623492 1.227916 0.6582511 0.593135409 1.739016 4.640866 1.653443  
0.9272629 2.293082 4.722928 1.427151 3.635236202 0.7131726 2.361412  
2.149550921 1.123378 1.476046 3.318906 1.817097 0.6711421 2.515292437  
5.452946459 1.299102977 0.1725956 2.352532 2.623176 0.6222409 0.9995502  
0.369868 1.802360111 1.122311 0.302083046 0.4402261 2.775075 0.90249  
2.535045 0.8093193 2.645698785 0.7906163 0.05768087 1.836847 2.422395  
0.1144638 5.081981 2.664935 2.470935722 3.366479 4.059286966 0.2490316  
0.1499614 2.472500027 8.868991 1.355416 1.108843 1.699103178 0.474429  
6.657975 4.187016 1.088884083 1.030399 0.939372 0.1809138 0.4784662  
1.070922 1.759719 1.618689  
AP000873.2 0.6935409 0.428438222 0.3992882 0.83323346 0.662824229  
0.468767871 0.5241646 0.320840528 0.1176157 0.2911635 0.323847124  
0.3462368 0.4508509 1.366999 1.006901 0.7647357 0.47227 0.435433158  
0.247808 0.3068513 0.462860181 0.4097978 1.715018732 0.7597082  
1.043152 0.319064161 0.5471894 0.1958869 0.3354474 1.088505 0.5016393  
0.36226522 0.6592605 0.732836104 0.5205385 1.324311862 0.746553351  
1.185981303 0.7558857 1.151469 0.619509929 1.365991 0.236060821 0.6886344  
0.543844958 1.088068 0.9160521 0.6943207 0.365039093 0.3044608  
0.8010911 1.401011 0.816586359 0.5102199 0.345042172 0.8641513

0.6166972 0.9147287 0.206075 0.5031337 0.3708376 0.7948187  
1.151733272 0.2749581 0.03786727 0.9244267 0.352906 0.8112084  
1.941552 0.3145329 0.6217186 1.144873976 0.2830302 0.2050904  
0.529997116 0.4782955 0.469554244 1.226938 0.3303238 0.9591839  
0.4697341 0.1347251 0.8334421 0.30086252 0.928659415 0.2466352  
0.2409078 0.7734306 0.373975625 0.4115268 0.2981323 0.3214885  
1.77934828 1.259677 1.138346 0.358468607 0.8479629 0.283027149 0.159004875  
0.2977565 0.093194385 0.1351635 0.4666956 0.253595838 1.278506  
0.415562 0.339347606 0.6812233 1.830549351 0.36853295 0.29211 1.3098451  
0.4254215 1.062531 0.9491799 0.3627609 0.3919903 0.624239858  
0.6988831 0.5682073 0.3201983 0.2934981 0.3408011 0.539367  
0.4559022 1.405702 0.5610063 0.9572405 1.341083 1.151249027 1.081391992  
0.2480253 0.392066497 0.534876738 0.4110357 1.035549113 0.4141246  
0.2141793 0.24185465 1.201723441 0.260748179 0.477181494 0.661714  
0.7402345 0.8926969 0.8179704 1.185919 0.7444417 0.71027755  
0.5686675 1.026425 0.810996681 1.29449 0.6266394 0.407906429 0.5965531  
0.2404155 0.222419988 0.8497126 0.9962218 0.388858074 0.9129979  
1.096836 0.2787544 0.803341403 0.8014542 0.5200257 0.13897627  
0.2184504 0.366035315 0.8474375 0.2480575 0.625275443 0.4700535  
1.992007867 0.6029653 1.540192 0.5217951 0.4570132 0.232842 0.84435102  
0.4124421 0.2513048 1.520574 1.066851 0.445289 0.06900611 0.9559531  
0.6237908 1.012961468 0.178899186 0.8264395 0.4046042 0.7049097  
0.6076226 0.870772128 0.8900423 0.78396881 0.8034414 0.2308522  
0.233936672 0.647460945 0.199894 0.3381728 0.572036723 0.3710549  
0.6098707 1.316445 0.4275574 0.7251561 1.206538 0.4129304 0.2512663  
0.1052529 0.851678 2.273001 0.6160942 0.2510916 1.22999353 1.204302  
0.4024563 0.245718399 0.3237019 0.5729612 0.6580456 0.9198501  
0.327488 0.927858914 1.583233 0.4581769 0.6042296 0.2398389 1.637598  
0.170999302 0.5756851 0.9939116 0.3596789 0.698214444 0.216977969  
1.030422 0.3948849 0.303183 0.994949707 0.8149301 0.4732717 0.354433526  
0.7619668 0.7196786 0.1088762 0.8435255 0.3306471 0.3130069  
1.235808383 0.3478078 0.198830653 0.5591905 1.657894 0.8801189  
0.3717752 0.8060941 0.4088451 0.3902795 0.59584241 1.329181  
0.8857531 0.136605619 0.4607932 0.2043914 0.5515607 0.4390739  
0.3657966 0.7547899 0.520014 1.293461 1.15479918 0.3948384 0.282799968  
1.690186 0.732005 0.2705259 0.909331057 0.425500802 4.771862 0.3501687  
1.216427 0.06232689 0.3432596 0.329166721 0.2582887 6.249344 0.2488524  
0.438404446 0.1616718 0.04131945 0.230094877 0.18578 0.494302822  
0.2581781 1.299722 0.538555525 0.5801444 0.4255478 0.77483308  
0.900015054 0.3468649 0.2917839 0.872898 0.8505709 0.9076138  
1.281985 0.9333588 0.4128402 0.3700834 0.570213541 0.2327869  
0.271707101 0.4895608 0.416289492 0.81446 0.2165544 0.371323491  
0.3944726 0.08491524 0.3819237 0.299625866 0.2049582 0.1225978  
0.150109671 1.402997686 0.3912889 0.8032463 0.7641322 1.190364476

0.789655513 1.526523043 0.1938172 0.3824007 0.1123886 0.166523  
0.2359218 0.4077876 0.3221819 0.2880543 0.9070652 0.1965951  
0.3001085 0.329807419 0.5158464 0.261041 0.778726 0.3237332 7.293858  
1.43278 0.4861327 0.2617096 0.9108049 0.5386486 1.432135047  
1.245055 0.3372229 0.7067377 0.1757668 0.854096281 0.7031198  
1.414005 1.402063 0.231846 1.443849 0.2803926 0.2367704 0.537818576  
0.2615569 0.2212632 0.456719515 0.1873974 0.6673341 0.8529604  
0.533228 0.6017035 0.902719373 0.428292142 0.6220878 1.052743 0.8658797  
0.251460356 1.157797365 0.622617097 0.522481 0.5014784 0.5226372  
0.4456272 1.044246 0.3344333 0.2598412 1.596937338 0.598319543  
0.3387977 0.874329352 6.66245 0.280802626 0.8200162 0.7894787  
0.4944327 1.634789 1.420157 0.5924649 1.346431 0.2199156 0.2822307  
0.911855788 1.13855 0.6037829 0.393431 0.3976609 1.839311842 0.557783  
0.6146355 0.5793454 0.467830193 0.5460313 0.587306 0.2716861  
0.2061881 0.9876314 0.5292716 0.4646539 0.880046566 0.91504576  
0.888352758 0.2852874 0.251387342 0.148767601 0.7543759 0.8274922  
0.637890276 1.072286 0.279078 0.3826367 1.576123663 0.4955524 0.2231666  
0.1661303 0.265035077 0.2927887 0.5303682 0.2054133 0.2408608  
0.225084 0.911334 0.4218372 0.5118085 1.00878 1.812172 0.6697465  
0.254463383 0.8020697 0.3656154 0.4532734 0.7887922 0.2838059  
0.282724 0.1934602 0.259339927 0.315168892 0.158919829 0.3672211  
0.6590065 0.1786829 0.586137 0.6802331 0.977104686 0.2119669  
1.391196 0.1608439 0.2657141 0.1119186 0.222475438 0.664895 0.7943731  
0.6725816 0.5918466 0.7423463 1.525866 1.433843 0.42724787 0.2558987  
0.3954139 0.113664694 0.2445398 1.006856 0.540268 0.993475 0.700223  
0.899172283 1.202753971 0.41603055 0.3005683 0.6753035 0.4061223  
0.2232708 0.6339243 0.2554765 0.609639555 0.3145336 0.060699875  
0.3159215 0.8104901 0.9904187 0.5985287 0.320966 0.524805004  
0.4468068 0.4578153 0.4325295 0.5074633 0.4082517 0.417748  
1.066356 0.859687765 0.9354072 0.323742858 0.8506774 0.2862625  
0.754601671 1.888791 0.6932654 0.4376592 0.901682865 0.3423238  
1.091727 1.910045 0.356986004 0.4732481 0.3271758 0.2408346 0.1335304  
1.107589 0.6667771 0.3604184  
AC012557.1 1.190165 0.697935915 0.4276931 0.547505285 0.33128884 0.511560546  
0.3096475 0.797273004 0.0522542 0.2165338 0.155671838 0.7755383  
0.5334402 1.081096 0.4379767 0.496732 0.1154008 0.337364663 0.1546028  
0.2018697 0.408800653 0.7542676 0.913359571 0.6109584 0.6773508  
0.479781234 0.3978079 0.3746007 0.3334281 0.5109222 0.6686036  
0.410531159 0.4295804 0.43512599 0.7867758 0.781449553 0.377426769  
0.654020423 0.4818348 0.8615974 0.744882915 1.26692 0.402434598  
0.9833975 0.342094174 0.6808951 0.198089 0.2300471 0.409831345  
0.2422198 0.697498 0.7690291 0.309357752 0.3562115 0.459885103  
0.4846259 0.6027685 0.5290347 0.3222729 0.6634992 0.1208206  
0.298795 0.53802809 0.3359349 0.3436829 0.4875257 0.1892938

0.1733085 0.8790439 0.3522623 0.2081084 0.783675657 0.234881  
0.4385025 0.167879004 0.3867746 0.204887914 0.7114057 0.9396764  
0.3504747 0.1377374 0.2469041 0.505974 0.403621731 0.426689428  
0.167406 0.2716923 0.5364892 0.391638257 0.3724372 0.4034751  
0.2434155 0.416731642 0.4986273 0.3903983 0.287619021 1.212894  
0.153685955 0.294749936 0.09921526 0.199258288 0.2642214 0.4818537  
0.215537514 0.7082923 0.2648975 0.169226085 0.5725352 1.076213354  
0.421023849 0.3445839 0.579542033 0.4331385 0.4327219 0.2978987  
0.196982 0.3624267 1.234808809 0.3971501 0.358915 0.5442892 0.7050174  
0.2281533 0.479259 0.2693219 1.934589 0.663309 0.4792202 0.5296135  
0.828670273 0.702045002 0.2777768 0.294777933 0.599037144 0.2599572  
1.033543947 0.3624816 0.3779784 0.354588209 0.446043572 0.3640842  
0.410025414 0.6409418 0.3457979 0.5629255 0.1494385 0.3675303  
0.3979214 0.414794661 0.4180974 0.7017497 0.647863111 0.7769095  
0.4939405 0.388969253 0.5784517 0.740715 0.392521327 0.2568622  
0.1830303 0.46350653 0.8066685 0.6487007 0.2043438 0.597997864  
0.6212797 0.3465548 0.377326006 0.1525118 1.490700286 1.035372  
0.2020457 0.345935671 0.1934471 1.110714127 0.3928979 1.158004  
0.4039682 0.3641504 0.5821891 0.716389385 0.3493765 0.2679587  
1.008102 0.8157606 0.4274598 0.2473077 0.6806611 0.8314117  
0.526639785 1.003817789 0.4589622 0.2035486 0.3312445 0.3036983  
0.50661008 0.3433973 0.53048918 0.5836651 0.911231 0.346443933  
0.84964286 0.2664261 0.5312168 0.516575253 0.1908812 0.1528452  
0.2749384 0.4264292 0.6682762 0.7897014 0.626282 0.1980574  
0.1187026 0.8762548 1.103932 0.334544 0.6669034 0.598612277 0.2726876  
0.4507324 0.56882042 0.4909513 0.8974685 0.7960186 0.2974879  
0.5184578 0.556381817 0.8175334 0.4975872 0.4362257 1.846961  
0.388498 0.139280937 0.3430992 0.2388844 0.2167121 0.763930551  
0.244704601 0.5788213 0.5609972 0.4390153 0.383097334 0.6637701  
0.5139805 0.723880066 0.2383223 0.3734995 0.1596256 0.1621156  
0.1854306 0.7478468 0.952036657 0.4249403 0.261611376 0.2940358  
1.021291 0.7720108 0.4497256 0.5819625 0.322918 0.3405935 0.439099619  
0.7972119 1.049391 0.346163622 0.5085001 0.2242373 0.4823555  
0.3466268 0.1232879 0.7855589 0.09185585 0.7595285 0.839819176  
0.2713504 0.412194331 0.3388742 0.6633515 0.5582111 1.002601831  
0.306804448 14.80932 0.6160677 1.149695 0.8376387 0.2287546 0.250236145  
0.374738 15.43123 0.3105087 0.31740939 0.4788493 0.201931 0.220488208  
0.3204423 0.252385802 0.2253097 0.6589039 0.595324004 0.6843602  
0.5041653 1.51466551 0.673954042 0.5982894 0.350648 0.4292743 0.62352  
0.9909258 1.304174 0.3663767 1.032808 0.5459996 0.341225352 0.538885  
0.357498541 1.087508 0.623893721 0.931565 0.3899062 0.191019372 0.2172187  
0.3043236 0.3393615 0.399352553 0.2428231 0.435741 0.268985393  
1.135479358 0.4134608 0.4386057 0.4957126 0.504569972 0.479662404  
0.873720109 0.2583268 0.2577682 0.7182514 0.277435 0.3640947

|             |             |             |             |             |                               |
|-------------|-------------|-------------|-------------|-------------|-------------------------------|
| 0.3220827   | 0.181676    | 0.4171087   | 0.4975694   | 0.3629591   | 0.3724829                     |
| 0.805896033 | 0.2432522   | 0.2391986   | 0.3749447   | 0.4218952   | 11.06963                      |
| 1.034401    | 0.3464657   | 0.3443443   | 0.8445805   | 0.4140876   | 0.787029933                   |
| 0.8801723   | 0.1205877   | 0.9568172   | 0.4382575   | 0.675210514 | 0.2397346                     |
| 0.5887737   | 0.5122974   | 0.1724203   | 1.266496    | 0.1612116   | 0.2086598                     |
| 0.711846751 | 0.2267858   | 0.1946392   | 0.287289756 | 0.2035165   | 0.3261309                     |
| 0.7551589   | 0.6637728   | 0.3545365   | 0.164154534 | 0.382883019 | 0.6344738                     |
| 0.4519108   | 1.032914    | 0.180721244 | 0.719002518 | 0.037565106 | 0.3191752                     |
| 0.3162271   | 0.3570338   | 0.5297379   | 1.047698    | 0.2493151   | 0.3386299                     |
| 0.830880853 | 0.742610721 | 0.2159646   | 0.571964207 | 10.26726    | 0.473207653                   |
| 0.6142848   | 0.2143466   | 0.4879122   | 0.8194185   | 0.5017163   | 0.5314374                     |
| 0.8534861   | 0.1853006   | 1.068943    | 0.579929896 | 1.543006    | 0.6212062 0.1794543           |
| 0.2345479   | 0.865035429 | 0.3407406   | 0.3218322   | 0.5845268   | 0.254035453                   |
| 0.3480644   | 0.3293679   | 0.3034855   | 0.5038279   | 0.7722599   | 0.3720434                     |
| 0.3350355   | 0.711418714 | 0.447189303 | 0.528523429 | 0.3356455   | 0.585022682                   |
| 0.195740929 | 0.4173609   | 0.8393234   | 0.370601744 | 1.015315    | 0.4399592                     |
| 0.3313876   | 0.636580765 | 0.4993401   | 1.454174    | 0.4330082   | 0.238597777                   |
| 0.5450967   | 0.3740954   | 0.2801495   | 0.3097641   | 0.6470595   | 0.4012391                     |
| 0.5890137   | 0.1509371   | 0.6305785   | 0.5148962   | 0.5285749   | 0.248716092                   |
| 0.9745288   | 0.595596    | 0.755767    | 0.3236925   | 0.242171    | 0.2491576 0.3078221           |
| 0.281647217 | 0.223585048 | 0.604062969 | 0.3167004   | 0.5489678   | 0.6664167                     |
| 0.2817534   | 0.6844244   | 0.986870402 | 0.7103296   | 0.6475116   | 0.2245873                     |
| 0.1855091   | 0.223754    | 0.291228515 | 0.569236    | 0.393842    | 0.3960185 0.1874701           |
| 0.9757796   | 0.7275137   | 1.156203    | 0.808254351 | 0.4502142   | 0.9135056                     |
| 0.305518048 | 0.3309461   | 0.5721601   | 0.5363166   | 0.7469511   | 0.2788328                     |
| 0.488257581 | 1.077110029 | 0.199330449 | 0.593209    | 0.7219309   | 0.2111434                     |
| 0.3928105   | 0.4294303   | 0.4767121   | 0.50147499  | 0.5220503   | 0.370805703                   |
| 0.1852717   | 0.6020601   | 1.124846    | 0.7260767   | 0.2300589   | 0.866022515                   |
| 0.2911435   | 0.2548909   | 0.3382083   | 0.4048994   | 0.1124031   | 0.567101                      |
| 0.3383997   | 0.314539917 | 0.6715052   | 0.534233863 | 0.1711838   | 0.3681539                     |
| 0.595543965 | 0.7053323   | 0.1512516   | 0.3111086   | 0.513388849 | 0.4023576                     |
| 0.4934423   | 0.6667519   | 0.42208445  | 0.1927331   | 0.4612301   | 0.5329702                     |
| 0.3915435   | 0.3711678   | 0.8146467   | 0.408127    |             |                               |
| AC084824.5  | 0.5358813   | 0.985605957 | 0.514099    | 1.721228027 | 3.539719199 0.855526986       |
| 1.291004    | 1.847884493 | 0.3092234   | 1.006796    | 0.882831451 | 1.668867 1.097992             |
| 1.230303    | 0.4954919   | 1.99466     | 1.10972     | 0.345533299 | 0.7624077 0.8106212           |
| 0.887021529 | 0.6541352   | 3.656300256 | 1.703435    | 1.213051    | 1.123845913 1.046266          |
| 0.5541913   | 0.2877466   | 1.289422    | 0.6594298   | 1.632246541 | 1.652376 2.475898493          |
| 0.8147797   | 1.42288151  | 2.829086268 | 2.335514194 | 1.029651    | 2.668827 1.457475741          |
| 1.874305    | 0.555678054 | 1.066895    | 1.712955817 | 1.103265    | 3.633902 3.488444 0.962966486 |
| 0.2047683   | 1.597768    | 4.991271    | 1.830678806 | 1.522404    | 1.088580332 2.253317          |
| 0.8142039   | 4.03072     | 0.9833518   | 1.616742    | 0.8341401   | 1.952357 2.44913513           |
| 0.4969884   | 1.134237    | 1.875262    | 0.3422769   | 1.217881    | 2.447951 0.2368834            |
| 0.9852143   | 1.617745908 | 0.3860972   | 0.1390133   | 1.419219252 | 1.04489                       |

0.242492039 2.104934 0.3564551 2.073996 0.6792378 0.7305493 1.272531  
0.213259147 3.213648572 0.7925237 1.105354 2.164615 1.429179351 0.9550503  
0.6632319 0.2619008 1.931764741 0.4823284 1.804883 1.237844398  
0.8473453 6.138879418 0.713550472 0.6360507 1.347595315 0.4886177  
0.9029604 0.956610806 1.609215 0.9579639 1.401995089 1.380328 1.741436333  
1.418760887 0.5461971 2.922904873 2.135978 9.042499 4.784928 1.942793  
1.455348 1.020858529 3.99535 1.956263 1.845323 1.043016 0.7425754 1.546963  
2.390639 1.401829 1.439257 1.823059 4.015541 4.32308844 1.961835201 1.083409  
5.505763017 1.490472453 0.5244349 1.581770105 1.832229 0.6452174  
0.524584493 3.684359505 0.628405215 0.985723931 0.9482214 1.337978  
1.214504 2.15555 4.015246 0.9250882 2.00245334 1.491776 1.730303 1.747781681  
2.079821 0.6430555 0.359655287 1.643083 1.360338 1.340084917 1.900034  
2.870252 1.474298677 1.939276 3.636758 1.04129 1.615519652 1.878228 1.495374  
1.190876202 0.8743118 1.666279674 3.19479 0.6974572 0.682378353 1.07321  
3.334752661 3.661941 3.492238 0.4855811 0.6823925 0.5872511 3.137126358  
0.7156719 0.3633879 2.769752 1.469211 0.5174117 0.4989158 1.510474  
1.394007 2.064670238 0.191621548 5.29618 1.118496 1.715173 0.7488283  
1.379058877 2.032114 2.209110894 1.138231 3.081354 0.640669621 1.040257402  
0.7007215 0.9605348 1.12386939 2.541539 0.6406791 1.179572 0.8832144  
1.078539 0.9735826 0.8922174 1.054836 0.3804904 1.296348 3.776724  
0.7995034 0.3157215 1.475997179 0.5042741 1.757985 1.542793399  
1.170186 0.584202 1.648703 1.90714 1.233896 3.004394455 3.412445 0.9703663  
1.638223 0.2101868 1.264453 0.370898728 1.725798 2.709477 1.531794 2.637070997  
0.482694145 1.855358 0.3651779 1.339568 1.525896162 2.722802 1.647517  
1.147416258 1.630675 2.164202 0.5903829 0.9250852 1.018939 1.408118  
2.068677109 1.383062 0.774065621 0.7420624 3.777293 1.794772 0.5322661  
2.251758 0.6867382 1.511641 1.675315854 2.664594 3.169665 0.768181501  
0.7164616 0.8745895 0.9654667 0.7569997 1.732747 1.010583 1.177742  
1.957345 1.838817639 0.7582774 0.573937015 1.94268 1.191669 1.303939  
1.122473145 2.471191379 11.20642 1.822844 0.9956376 2.027812 0.8272584  
1.057725939 0.2042506 6.373168 0.3828104 2.171814188 0.6021559  
0.3414178 1.565733209 0.1580228 0.533406175 0.6999877 2.300516  
2.132302339 1.048615 0.8391056 0 1.311921498 0.3688003 1.245012  
1.508307 1.434918 1.535804 2.534729 1.653175 2.842709 1.262128 1.724785369  
0.3543274 0.642223685 1.425008 0.963130595 0.9605461 0.6180371  
1.271689497 1.325599 0.9413735 0.6024693 0.640043852 0.8082833  
0.3223217 0.397942071 1.873678408 0.3823011 0.9733223 1.075604  
3.117611444 0.999921372 2.784057295 0.8917382 0.6673575 1.250111  
0.4651683 0.7630854 0.8040857 1.164691 1.465561 1.405308 0.2842775  
0.3788526 0.313752056 0.6870283 2.909638 0.8320505 1.131289 9.063789  
1.648028 0.4149359 0.4366538 1.080639 1.531522 1.247514586 2.547672  
0.5351992 1.65721 1.011452 3.450811737 3.60579 5.226257 1.610543 0.4008428  
2.141346 0.437249 0.8699594 0.688578152 0.1830061 0.7038849 0.555797858  
0.9534396 3.66688 2.547208 0.727406 1.943765 0.758916619 1.623807193

2.190189 1.542843 1.05982 0.74861478 1.341194401 1.945108446 1.377232  
0.7017486 1.137667 2.046339 1.599984 0.5327711 0.7097152 1.843831239  
3.501890539 1.54426 1.692349299 4.993832 1.400144678 1.211713 2.114056  
0.7561993 2.48514 2.004071 0.6235526 2.240209 0.4934469 0.4591204  
1.896541478 4.012111 2.021853 0.4171956 1.338408 1.279749751 0.7561471  
0.6877356 1.29714 1.639962969 0.9612083 0.487273 0.4489822 0.6138362  
0.8568719 1.179446 3.689897 2.200653135 6.421220562 2.904228013 0.4201664  
1.601163169 0.620534629 1.44072 1.749684 1.483568241 1.090217 0.4556188  
1.155615 1.883539214 0.5171132 0.4302666 0.8007507 2.269196082  
0.5040165 1.185951 0.5871496 1.374813 1.100863 1.127841 0.7373368  
0.7017976 3.858771 1.447319 1.714349 0.449723125 0.6407717 1.927485  
1.272316 1.044822 0.3908426 0.8712563 0.6180398 0.357149324 0.330775943  
0.723440801 0.4685325 1.51602 1.801835 4.585144 1.27292 1.365801504  
0.7881562 2.133596 0.359947 0.4802799 0.6988325 0.746804873 0.3859801  
3.704036 0.849522 2.377259 0.9253762 2.354401 2.902681 1.444860659 0.6290523  
1.299478 1.273787662 0.244804 1.467205 1.861525 1.872452 0.6750172 1.10475145  
1.775610853 1.415487505 0.3343256 2.410715 0.4060805 0.8071267  
1.043719 0.7388405 1.178298378 1.115589 0.493719264 0.1370472 1.922035  
0.7564174 1.043481 0.6497658 1.724705857 3.015062 1.843553 1.459359  
1.272909 1.538194 2.684736 1.034645 1.82810687 1.528365 0.516771012 0.7597576  
0.3812577 1.152154062 3.674871 1.253081 1.265715 1.898792898 0.5952554  
2.509402 1.726209 0.66606902 1.033607 0.6823525 0.5913646 0.9268109  
0.7321503 2.848663 0.6673478  
LINC01230 46.76004 0.224867562 0.0378945 0.006930016 0 0.027026285  
0.01140173 0 0 0 0.6472829 0 0.005613911 0 0.009580733 0  
0 0 0.005840353 0 0 0.06528449 0.0190355 0.007219813 0.024291211  
0 0 0 0 12.51368 0 0 0.006778562 0.005311236 0.036521176  
0.010191482 0 0.005421151 0.01090562 0 0 0 36.54305 0.010658552 0  
0 0.06988337 0 0 0.004556666 0.03014382 0 0.04007756 0.117971631  
0 0 0.05356981 0 0 0 0.033526444 0.006803321 0 0 0  
0.04826013 0.005235975 0 0 0.394927684 0.005285321 0 0.058283482 0  
0.049792449 0 0.004879548 26.60781 0.009298151 0 0 0.029193248  
0.031422815 0.07458641 0 0.004938604 0.005287614 0 0 0 0.05063766  
0.00776781 0.004941444 0 0.02046951 0.077810837 0 0 0 0.04682114  
0.01301128 0 0 0 0.006854301 0 0.006811054 0.009473928 0.09470796  
0.005334923 0 0.02738576 0.02585579 0 0.005242737 0.022065205 0 0  
0.004592872 0.03938744 0 0 0.009916874 18.0064 0.004477757 0  
0.0134071 0.017665424 0.003949375 0.0306846 0 0.016543151 0  
0.014435334 0.01835236 0.9539038 0.239369567 0.015055387 0 0.010379745  
16.79178 0.01616092 0.004750131 0 0.03435318 0.01151238 0 0 0  
0.023153758 0 0.004001294 0.004923355 0.0046859 0 0 0.03467966  
0.0296537 0.004693445 0 0.0207433 0 0.010530953 0 0 0.076415708  
0 0 0.005990928 0 0 0 0.006615905 0 0.009019921 0 0 0  
0.029016501 0 0 0.005833139 0 51.02834 0 0 0.010665459



9.620313124 0.03717944 0.0235557 0.006708333 0 0 0 0.007958087 0  
0 0 0 0.005995152 0.023907 0.006153902 0 0.00515901 0.01113605  
0.004318002 0 0.01066197 0.01409267 0 0 0.01901339 0.02095943  
0.02084663 0 0.005051266 0.004602037 0 0 0.02761861 18.72798 0 0  
0 0.011267792 0.0473046 0 0 22.23408 0.02360348 0 0.006948414 0  
0 0 0 0.01172223 0.2863038 0.01667043 0.011936079 0.006110277  
0.008674237 0.099478239 0.0060331 0 0.005387872 0.009380429 0  
0.02065271 0.03012587 0 0 0 0.02068309 0.06700582 0 0  
0.004087315 0 0 0.005979652 0.07969563 0.030044885 0.03923084 0 0  
0.01002836 0.02496814 0 0.006200853 0.03969523 0.020409527 0 0 0  
0.009595809 0.005949915 0.016463187 0 9.014745 0.01386283 0.005678907  
0.4472269 0 0 0.007988588 0 0 0.168738808 0.004848805 0.01168425  
0 0.02163189 0 0.009125904 0.005337624 0.006345498 0 0.02552577  
1.8404918 0.510036117 0.02019417 0 0 0 0 0 0 0.01459279 0  
0 0 0 26.83166 0.032960966 0 0.09024393 0.019342532 0 0.4202136  
0.006872716 0 0.006147037 0 0 0.017688939 12.50772 0 0 0.012021769  
0 0.054444607 0 0 0 0 0 0 0.005279528 0.1465706 0 0  
0.317828648 0.004478474 0 0 0 0 0.0161143 0 0.02490581  
0.004622801 0.03594027 0.034154692 0.02325022 0 0.02363094 0  
0.093233862 0 0.01882703 0 0 0 0 0 0 0.004379794 0 0  
0 0.01223473 0 0.02111776 0.004155553 0 0.03212326 0.007040042  
16.03975 0.007319899 0 0.00760765 0 0 0.005562011 0 0.06844477 0  
0.06286409 0.012019229 0.056397309 0 0 0 0 0.01184804 0.007234877  
0.01411593 0.03318957 0.02709523 13.01906 0.005575716 0.06004303 0  
0.10508403 0.09469339 0 0.01557554 0.006785773 0.00761679 0 0  
0.007398614 0.014031006 0 0 0.1306059 0.06002044 0.004887417 0  
0.007539008 0 0.02130926 0.007645433 0 0 0.005663038 0 0  
0.013244809 0 0 0 0.006445987 0.005056294 0.0588996 0 0 0 0  
0.03782375 0.05645982 0 0 0 0.004366807 0.05804735 0.01042763  
0.04117172 0 11.16623 0.01507744 0.2216691 0 0.004458568 0.03669757  
0 0 0.020124548 0 0.03206893 0 0 0 0.007920513 0.083812285  
0.01198794 0.01192122 0.003790268 0 0.005034939 0.003931955 0.00480338  
0.0284859 0 0 0.7752548 0 0.007095549 0 0 0 0.011249678 0  
0.01544978 0.004177474 0.02100998 0 0 0 0 4.559452 0.004177279 0  
0 0.3913552 0.009194598 0.005974014 0.005873618 0.015019044 0.006253508  
0 20.01212 0.004201268 0.008471148 0 0.1080972 0 0 0 0  
0.007656584 0 0.004550023 0.02092194 0 0.004952568 0 0.598406208  
0.04347403 0 0 0.004332126 0 0 0.02250499 0 0 0 17.59817  
0.005286335 0.006264047 0.009998877 0  
AC004253.1 0.3563391 1.906582015 0.1673415 0.599815601 0.967843147  
0.473412277 0.704898 0.598935007 0.3271241 0.2323809 0.259878396  
0.9415875 0.4065438 0.555317 0.6773962 1.895415 0.4695845 0.389905061  
0.7097578 0.4693944 0.307103113 0.8141208 2.152604427 1.882954  
0.8927121 1.201419402 0.4427334 0 0 0.9031055 0.4883227

0.321253251 1.048819 2.011566054 0.4268688 1.429988629 1.165640295  
1.468310973 0.7373432 1.382164 0.541527122 1.281199 0.134364775 0.574589  
1.219061002 0.933706 2.430568 1.368144 0.120736235 0.1299733 0.7606177  
1.646184 1.161993361 0.9415435 0.499025598 1.56028 0.03281286 2.914461  
0.1260942 0.7330003 0.05042445 2.275812 0.880910745 0.5888497  
0.1324024 0.4883249 0.0263339 1.139202 1.974617 0.280668 0.2605619  
1.528847235 0.03267585 0.03921619 0.480440616 0.4842608 0.333488668  
0.8270925 0.1810032 0.1097029 0.172454 0.2060907 1.076957 0.360967327  
2.234078439 0.1676805 0.2834768 2.259391 1.209530885 0.404135 0.02806504  
0.3324744 1.321813561 0.7443648 0.5498976 0.491063399 0.7593015  
2.116646114 0.167746098 0.1242224 0.071280336 0.3308182 0.3619827  
0.809590703 1.741962 0.294813 0.254255257 1.964679 1.305363546 0.907856639  
0.09245058 1.451230256 0.1446162 3.149149 1.705069 0.2466312 1.069615  
0.636605265 2.138181 2.388806 0.4827128 0.2739465 0.3713569 1.03646  
1.226197 0.148298 0.6643964 1.542876 0.9946533 1.802036101 1.342908829  
0.6955804 1.706978669 0.64774797 0.2367122 1.740271249 0.7185877  
0.03640366 0.36996823 1.861561629 0.202600588 0.545457733 0.6201064  
0.333043 1.11595 0.5145369 2.867188 1.459065 0.956685055 0.5234785  
1.334208 1.336022432 0.5095246 0.7173878 0.517446675 1.50644 0.1918783  
0.491456005 1.500819 2.016634 0.290166486 0.8521779 0.7267099 0.1705657  
0.781275897 1.285181 1.33787 0.125981524 0.04773807 1.202810491 1.703756  
0.5059423 0.360940394 0.635789 3.394867737 1.524975 2.537287 0.3161176  
0.5167254 0.09939946 0.968711121 0.1345958 0.1397906 2.596512  
1.021372 0.1946184 0.02814921 1.123382 1.873743 0.692347857 0.121628636  
2.873217 0.5097057 2.115146 0.9294883 1.192485382 0.7643561 1.525196655  
1.328686 0.760604 0.216882421 1.540668109 0.5559644 0.1478021 0.798960592  
0.9559706 0.8930585 0.7228965 1.281385 1.16633 0.9557868 0.9583883  
0 0.1486216 1.998315 1.98688 0 0.1001995 0.655805509 1.707092  
0.5643392 0.079132349 0.2390481 0.4045229 1.036521 1.324336 0.3951255  
1.776374366 2.010627 0.3681385 1.218393 0 0.6323442 0.4185278  
0.2577463 0.7477375 0.4220754 1.020243861 0.102127399 0.9662836  
0.1685751 1.236755 0.664140051 0.8310728 1.555195 0.356059567 0.5967824  
1.870559 0.2664789 2.493714 0.2321683 0.4681705 1.638995484 0.7093949  
0.046792901 0.3681473 2.557413 0.6904254 0.1126157 1.177043 0.2779626  
0.8528796 1.128484127 1.848423 3.448959 0.185748806 0.9398419 0.02552328  
0.8881365 0.9919859 0.8104029 1.069085 0.6900482 1.595171 1.514152672  
0.2642454 0.273222833 1.219825 1.33481 0.5517693 1.865996596 0.981676435  
0.7459424 1.199873 1.334148 0 0.3500591 0.17903312 0.1234712  
5.474188 0.1295907 1.341266062 0.1199086 0.1083547 0.193243456  
0.03343413 0.225713884 0.1410494 1.121973 1.294598565 1.009862 0.683843  
3.31876249 1.243529525 0.124848 0.2926857 1.074945 0.9975326 1.122527  
1.632891 1.857823 0.6916725 0.3418091 0.640846383 0.03748392 0.223802878  
0.5446455 0.033962853 0.7775768 0.06974025 1.106141121 0.5779329 0  
0.2124486 0.541676457 0.1900165 0.3068827 0.091849893 0.382758923

0.4529641 0.2471202 0.3103283 1.040523515 1.064630721 3.239747001  
0.2156252 0.2420538 0.05289918 0.1389449 0.1139661 0.4032634  
0.1516449 0.1305601 1.245963 0.08019577 0.3789232 0.159319179 1.16288  
1.397612 1.079733 0.06602919 5.230083 1.693619 0.1445974 0.4003405  
1.400415 0.2221963 1.090978774 1.916555 0.1006545 1.139544 0.1536416  
1.537085038 0.3501861 3.569472 1.04231 0.154199 1.391546 0.1345632  
0.09500085 1.028385162 0.3872004 0.2166203 0.083007901 0.2972815  
0.6533311 1.399334 0.2770254 1.175022 0.154147162 1.310328212 0.7943924  
1.262202 1.084669 0 0.900226513 0.37626688 0.6660383 0.2639546  
0.8252748 0.7738009 1.354084 0.1040516 0.1766589 1.820531459  
1.859570289 0.4055974 1.34800436 3.345851 0.236991702 0.8423637  
1.833878 0.4654401 3.180452 1.109773 0.3671094 1.137549 0.09280216  
0.215866 0.72610075 2.810065 0.4666684 0.3530775 0.5873309 1.977774339  
0.319968 0.223861 1.143526 0.780704707 0.9296933 0.3534726 0.1899894  
0.2226414 1.087771 0.2218174 1.39827 1.659999088 3.787579118 2.268813688  
0.1939591 0.47611016 0.070022077 0.9144736 0.191068 1.037202423  
0.5741014 0.08262759 0.4149135 0.916584989 0.2188194 0.04551744  
0.03388423 0.085353186 0.170622 0.501842 0.1169203 0.6981118 0.4050752  
0.5526081 0.1985507 0.3239669 3.445158 1.031481 0.865433 0.069201062  
0.3796047 0.7923228 0.6199618 2.026394 0.2756455 0.3970369  
0.0825875 0.050376595 0.124417545 0.036015074 0.1321748 1.283025  
0.2301756 1.469871 1.346609 1.155893486 0.1482279 2.100492 0.1171643  
0.2322665 0.6225578 0.121544141 0.2969631 2.430326 0.8181271  
0.3688486 0.6891777 2.618788 1.403755 0.927643015 0.4071097 0.7918297  
0.347748747 0.2302005 0.6208562 1.265509 1.195003 0.4760623 1.798007365  
2.350407957 1.297771929 0 1.859437 0.4758515 0.1912626 0.5760727  
0.08526671 0.701738568 0.1089388 0.60354707 0.1933077 0.4760898  
0.08535529 0.9610314 0.1833014 1.459638359 0.2430173 0.1063787  
1.023346 0.4119001 0.3166519 1.420077 0.8473861 0.956418654 0.9701048  
0.488802089 0.06123729 0.1843787 1.577337242 3.033293 1.628621 0.3408328  
0.642788088 0.3977143 1.583148 0.8348061 0.634164587 0.06032782  
0.1924943 0.08341311 0.06536423 0.5034471 0.8345272 0.6992565  
ASB16-AS1 1.523014 3.262115325 1.533664 2.600733567 2.925636581 2.408584009  
2.817643 3.155148498 1.245944 1.551977 2.719426693 2.644196 2.062277 3.66972  
4.453663 4.235886 2.185521 2.359084118 1.535973 1.704732 2.382698481 2.105965  
4.563783899 2.801468 3.922562 2.681216469 2.755565 2.625825 4.637632 4.710221  
3.376629 2.682960889 2.283307 3.699455321 2.54039 3.528488273 4.130941098  
4.12265725 2.187397 3.892095 3.204842627 3.82445 1.312732932 6.041126  
2.849672284 2.617281 5.707217 3.942502 1.341251966 1.065711 2.933909 5.077084  
2.904416577 2.310146 2.558606292 3.439099 2.16106 3.383511 1.440796 3.305613  
2.250652 3.302474 4.697685098 1.585312 1.477417 2.437919 1.164943 3.07236 3.17223  
1.216945 2.005522 4.264075709 1.938129 2.014883 3.055778086 2.230373 8.717256133  
3.811557 2.148396 4.123937 1.71052 1.890841 3.286291 1.088419205 4.104260326  
1.729699 2.935437 5.657066 2.3604855 1.461558 2.956275 2.247942 2.594532806

2.419761 3.024089 2.07167538 0.6778155 5.229508225 2.375939367 1.708546  
1.95841275 1.132044 1.986687 1.793386018 3.832573 1.169665 1.958661228  
2.923058 4.235088213 2.463236729 1.644468 4.560381136 2.366767 4.641657  
4.862219 1.728691 1.999672 3.355597368 2.712648 4.457258 1.543388 2.717193  
1.654686 2.532209 3.150031 1.176738 1.69142 2.697919 4.73552 5.123838148  
3.48739428 2.377106 4.960327732 3.503216148 1.942868 3.523060694 3.211106  
2.101468 0.888044067 3.942121606 2.592299237 3.755336932 3.097033 2.351988  
3.040999 2.152764 3.623311 2.788512 2.819609751 2.174626 2.943672 2.801767833  
4.043057 2.026706 1.569909949 3.356186 1.877807 3.43472117 2.232926 2.773058  
2.578754381 2.748627 2.968007 2.633553 3.144900147 3.247213 3.808828 1.949333637  
1.174279 2.468341125 5.95875 1.371666 2.720844989 2.672628 4.138087386  
3.786322 6.759026 1.191481 1.59787 1.314551 3.380717223 1.622044 1.76368  
4.907571 3.840851 2.02688 2.082859 4.103511 2.904781 2.949621663 1.970449829  
5.654116 2.527809 2.032131 2.497596 2.83869691 2.530298 3.68439192 2.675304  
4.537299 1.862931832 1.928370111 1.404345 1.553965 2.513246071 1.501314 1.87283  
4.452349 3.664622 2.660749 3.765912 3.704446 1.229808 1.248099 3.412267 6.64906  
2.991313 1.331757 2.490385241 4.362845 2.951415 1.616873328 2.465888 2.777432  
3.535061 2.988369 1.965164 3.890070133 4.96032 2.567254 2.875366 0.3352309  
2.045647 1.314562927 1.891816 2.333752 2.153026 3.282510204 1.904385376  
3.229901 1.644178 3.584689 2.349507919 2.945057 3.367016 2.228148664 3.381403  
3.115444 1.374424 4.849092 1.519853 2.110746 4.027228741 1.977193 1.141746791  
1.842955 4.532097 2.940127 1.65763 2.746343 1.849715 2.097945 5.234924243 4.03347  
5.755831 1.959071007 2.351552 1.164526 2.988067 2.189224 2.334889 0.2969102  
1.863193 3.955504 3.854729053 1.527652 2.366746517 3.114198 2.494926 2.459127  
2.759413147 2.1336628 2.452167 2.966794 4.157951 1.342853 2.013836 1.642592487  
1.479405 2.523205 1.998753 3.82355738 2.931716 0.7451513 2.66698413  
1.273433 2.247743265 1.23674 3.626586 2.692662952 3.879124 2.457473 9.2169859  
3.356663147 1.907027 1.799898 2.658851 2.503669 3.205422 6.110077 3.080297  
3.609215 1.330694 2.55667025 1.412809 2.048589129 2.631631 2.742100014  
1.717795 1.916099 2.502683782 2.576182 1.697251 1.803775 2.157356065 2.321971  
1.609873 1.803842288 2.700917668 2.04744 2.472898 2.031515 3.811264818  
2.972976294 7.194694407 2.30982 1.920687 0.4197529 1.488405 2.403975  
1.564941 2.414112 2.389251 2.539075 1.681025 2.041114 2.644266613 2.273896  
2.845113 2.193129 2.128502 3.717753 1.561272 1.737452 2.028192 2.250795 2.365517  
3.581431814 3.421752 2.865298 2.706874 2.298949 4.375568742 2.27259 4.510228  
4.495861 1.31533 3.960945 1.815181 2.063604 1.264830141 1.24945 1.718873  
1.635683059 2.173573 2.446273 3.796251 0.9830773 2.362017 1.916270634  
3.163599479 2.678975 3.617675 3.798579 2.019890489 3.307640321 1.940680557  
3.243661 2.277735 2.442053 2.48527 3.978862 1.713214 1.990529 5.586708719  
4.703352171 1.698599 3.075203442 3.353582 2.585714339 3.407449 3.389493  
2.262115 3.714281 2.006274 2.407775 4.814082 2.144711 2.355221 4.169564429  
4.087921 0.6943116 2.018465 2.330223 3.587099197 1.527591 5.177995 3.121397  
3.332605303 1.919193 1.922451 2.14827 1.450126 3.092924 2.19574 2.459439  
3.469704222 4.057328655 4.6695137 1.269722 2.186831434 1.819663145

2.496517 0.9665246 3.070065913 2.538048 2.343936 2.422208 5.73149115  
1.947163 2.564371 1.92242 1.820174039 2.62314 2.535268 2.249813 2.923619  
2.097301 3.896602 2.025632 1.617376 4.990461 5.690963 2.701426 1.654186689  
2.576462 4.733778 1.890074 2.280345 2.105214 2.289718 1.447184 1.394080122  
2.023858734 2.257647346 1.560093 2.527008 2.340118 2.122733 3.632998 4.040409963  
2.065671 5.007507 2.152242 1.05974 2.148887 1.263426644 5.655336 4.716327  
1.711476 2.467823 3.349516 5.330516 4.768774 2.325346673 2.497347 2.993216  
2.635200423 1.484138 2.567448 2.884446 2.67978 2.688346 3.6238473 3.607780668  
1.44564813 1.445312 3.437607 2.244541 2.222289 3.778787 2.413163 2.564333492  
2.593274 3.951025207 0.9356722 2.644427 2.125 2.267113 1.532408 2.89554276  
2.446572 1.934419 2.065053 2.778149 3.336201 3.680962 3.093028 3.130521544  
2.245175 1.883174366 1.548855 0.8138146 1.911550872 4.829045 2.577094  
1.699968 3.448148726 2.235392 2.474144 3.339677 1.810147481 3.105558 1.405239  
1.505776 1.361489 3.50316 2.949216 2.171412  
AL022328.1 0.396866 0.973234334 1.127559 2.624417333 2.211441563 0.909771857  
0.6476803 0.781316425 0.3339677 0.197702 0.729616752 0.7810449  
1.334086 2.763806 1.84418 2.11648 0.5900411 0.762952302 0.4281765  
0.3686264 1.184438599 0.8976448 1.442199933 2.342859 1.275943 1.379872911  
0.9887403 0.1064068 0.639303 2.189747 0.3917089 0.721542866 1.180582  
2.524276928 1.575582 3.150320687 1.286514676 2.911575122 1.026503 4.129989  
1.228569203 2.242289 0.377233324 0.7542124 0.571826873 2.362376 3.49424  
0.588112 0.523863916 0.3980773 1.869425 2.790468 3.400734825 1.011833  
0.862172324 3.362834 0.3014939 1.55534 0.2317179 1.197336 0.3603555  
3.819325 1.587070307 0.5582281 0.1351724 1.287897 0.295733 0.8030475  
3.503086 0.1228027 0.798039 2.003455341 0.3669539 0.4404027 1.440819294  
1.139251 0.183327533 1.623838 0.6159664 0.5599896 0.7629347 0.368204  
1.131826 0.442222734 1.586654944 0.6419567 0.3472887 0.6857633  
0.934469638 0.7617041 0.4011304 0.9900041 1.349466565 1.421818  
1.278749 0.501336692 0.6890546 0.982239733 0.685021722 0.6341059  
0.21831467 0.3799565 0.8622964 1.859687431 3.589143 0.451471 0.302836805  
1.328152 3.482144031 1.106239673 0.503385 1.885660918 1.550237 0.7605449  
0.7071756 0.5455468 0.6618133 1.021308148 3.147456 1.134878 0.1449445  
0.6215057 0.6415976 1.253064 1.126665 0.8579358 1.667477 2.100205  
4.569579 4.905961601 1.844622428 0.5164598 1.036193769 0.870130503  
1.298946 2.50557238 0.8494558 0.148661 0.113312445 2.565683685 0.180984208  
1.343036958 0.5958394 0.9860304 2.578407 1.146112 5.239998 3.233498  
2.176644348 1.037423 1.827235 1.022979519 2.128026 1.692087 1.336217206  
3.016759 1.142706 0.424547125 2.134159 0.9358286 0.740592286 1.417787  
1.047407 0.9287147 1.262899254 2.762248 2.362566 0.482314204 0.5604729  
0.973910327 2.344408 0.6887025 1.252870925 0.618181 2.38018957 1.807988  
2.960421 0.2259116 0.5275356 0.1691316 1.391893618 0.8588229  
0.3710593 3.644894 2.992211 0.4967248 0.2873811 2.016934 2.904839  
2.760011142 0.20695528 1.407996 0.8548919 2.074713 1.682201 2.1758373  
1.219292 2.310542213 1.017362 0.4437236 0.376413507 1.909949586 0.6811145

0.4904062 2.136292318 0.7319775 0.7163685 0.8434513 1.117414  
1.579011 2.052508 0.5633433 0.3037986 0.3034616 1.840109 2.51351  
0.6578898 0.3409858 1.657872145 1.946132 2.775973 0.686696618 0.5578265  
0.917746 1.831509 1.394293 0.8932245 2.346930248 2.50055 0.7516804  
3.345614 0 1.042849 0.249248773 0.8332718 0.2544602 0.4616844  
2.050626129 0.41705582 2.712871 0.7170905 0.6663871 2.26011398  
2.005449 2.053099 0.462647197 3.427129 1.193557 0.3060604 0.5328594  
0.7449369 1.042832 2.585984507 0.7966594 0.573261987 0.3758491  
3.481221 2.114608 0.5518641 2.403335 0.902929 0.3047528 0.70898005  
1.811609 2.235627 0.31605794 1.330925 0.104229 0.7979107 0.8650477  
0.5515713 0.8295027 1.487245 3.977401 3.220478139 0.5395471 0.867809576  
1.678508 1.665565 0.6008667 1.246931464 1.132937111 1.087926 1.793714 3.04671  
0.2920106 0.7797437 0.594030394 0.5294278 2.794355 0.429981 1.724336471  
0.7038984 0.1474954 0.53549113 0.3754694 0.506959049 0.4032008  
3.200509 1.081376359 1.030989 2.040744 5.32430276 2.901816656 0.06372992  
0.6274984 2.6407 1.372628 1.296802 2.614983 1.451787 1.964919 0.52344  
2.798749848 0.1530724 0.359047773 0.7943425 0.45075385 2.417616  
0.9611899 0.885113035 1.214754 0.3889994 0.1735145 0.467930354  
0.3103868 0.24368 0.500114341 2.62371747 0.8588178 0.7288379  
0.6547623 1.062291789 1.477073756 3.092749841 0.6053746 0.9884709 0  
0.3546293 0.3878345 0.7204748 0.232226 0.5331661 1.503307 0.6276969  
0.8034586 0.921695892 0.7914719 0.9512342 1.725373 1.078569 4.004624  
0.9153798 0.9490013 0.6287936 2.217513 0.7561491 2.946187516  
4.793793 0.4110409 2.893544 0.7618713 1.137700181 1.481122 3.406485  
3.137777 0.2518799 2.709161 0.3434459 0.5091887 0.314969849 0.342594  
0.5805243 0.790948367 1.25736 2.251122 2.278052 0.4713682 0.9596831  
0.393429996 0.391533932 0.5744664 2.932693 1.213838 0.231005607 3.716197933  
1.536554287 1.121954 0.9431684 1.26381 1.880927 1.512014 0.4603231  
0.2524965 3.1862021 3.144346624 0.6441286 2.62339133 3.68552  
0.544386796 2.243443 0.8676252 0.9800532 3.194618 1.261253 0.8901251  
1.478078 0.52109 0.749299 1.170459699 3.406763 0.1985131 0.5570808  
0.3854688 1.778775327 1.437312 0.594215 1.494334 1.505515168 1.156768  
0.5713735 0.8243472 0.4167151 1.696639 0.7246655 0.9516815  
1.116039799 1.378604384 2.55755741 0.1320112 0.486070624 0.679126253  
2.667443 0.04876632 1.198230326 0.8373027 0.4498997 0.3630803  
2.278373166 0.5106223 0.6970454 0.6226758 0.217847044 0.653218  
0.7172771 0.6266734 0.7127166 0.7443892 1.07705 1.013523 0.3583065  
4.0668 1.74413 1.819049 0.565190264 1.051911 1.427468 1.632298 0.6394435  
0.3658357 0.37639 0.4215764 0.282867744 0.349306162 0.588296432  
0.7759049 1.9648 1.028085 0.7803232 2.224645 1.42422888 0.6053157  
2.332544 0.5741542 0.2371256 0.3813492 0.372260717 0.7579393  
6.760288 1.012415 1.574727 1.151338 2.644514 5.150285 1.11924064 0.8312532  
2.380275 0.461530973 0.3995279 1.365204 1.371085 1.087394 0.712832 2.092609744  
1.927531211 0.866295134 0 2.241093 0.9716132 1.004214 1.058624 0.6383706

1.168894633 0.9268152 0.18959187 0.07894073 2.63277 1.045692 0.7424818  
0.2406036 1.405021884 1.922786 0.9412359 0.7205206 2.199629 0.6465529  
0.8215451 2.018599 1.952854824 1.88176 1.024320785 0.4063696 0.047059  
1.141874568 4.115935 0.3866726 0.5467994 1.859334022 0.2436208  
2.286429 3.231526 0.899210595 0.8622586 0.2358256 0.1987023 0.2335609  
1.858233 1.293756 0.4667711  
AC018638.7 0.454104 2.314198068 0.1319504 0.713194441 0.524920657 0.426965978  
0.4631825 0.34982679 0 0.508985 0.156533576 0.3093546 0.3689028  
2.447832 0.4945681 1.466011 0.1740595 0.241969808 0.4946411 0.2372578  
0.209268748 0.8131269 1.591265481 0.8119605 0.7430185 0.592081913  
0.3030379 0.2511162 0.1523972 1.186846 1.482126 0.351821334 1.0367  
1.21163449 0.3739892 1.033047314 1.076445538 0.593732154 0.5872752  
2.023163 0.685307812 0.8151391 0.103004954 1.522216 0.418558671 0.8180405  
1.368948 1.135573 0.238004284 0.2087662 0.7774596 2.122568 1.102885381  
0.5209939 0.386760345 1.936577 0.1581144 1.233188 0.1104739 0.8562636  
0.1325339 2.553817 0.794484926 0.2763773 0.1305008 1.46176 0.06921513  
0.4277485 0.6522972 0.2458994 0.1597988 1.879237931 0.1145121  
0.08589542 0.407770738 0.4888347 0.078662981 1.769779 0.1850111  
3.508129 0.251818 0.1805606 0.6244055 0.67994061 2.425381542 0.2203629  
0.1365982 1.979502 0.372325874 0.5583437 0.1721188 0.1456441  
1.615202965 0.6100799 0.3613331 1.032555572 0.203268 2.107318638  
0.367415152 0.126973 0.046837707 0.1811482 0.8633285 0.650191935  
1.345805 0.09685958 0.44551729 0.5001069 1.401903145 0.551643705  
0.08099799 1.560421891 0.1900522 1.572356 1.727263 0.2700988 0.5537488  
0.537824504 1.241611 1.357267 0.4104766 0.4000176 0.3378676 0.4181881  
0.8325812 0.7795627 0.3153 1.37678 2.759553 1.004693214 0.524100472  
0.3462576 2.465589841 0.5675063 0.2981213 1.11419659 0.3147853  
0.1435232 0.064827467 1.936759361 0.221878562 0.351387915 1.693783  
0.3063757 0.3859375 0.8401219 1.767709 0.187071 0.730407815 0.3372288  
1.46829 0.418042413 0.3449499 0.5093173 0.320009265 0.545697 0.5463535  
0.612741999 1.361861 1.244803 0.495731468 1.161396 1.011208 0.09962424  
0.541890344 0.3852021 0.9503815 0.289734888 0.05228047 1.489867659  
0.6814493 0.2216336 0.173925317 0.2122014 1.039219749 0.6033839  
2.003119 0.4015885 0.4260843 0.2467438 1.084461762 0.1621433  
0.2939367 5.181628 0.6808618 1.832977 0.09864859 1.001189 1.76323  
0.866544637 0.142082045 1.862793 0.2711284 0.9265629 0.1850785  
0.70021335 1.443974 1.22849569 0.611148 0.5949839 0.275522444 1.07663684  
0.308492 0.3561049 0.633321588 0.5234669 0.1956071 0.4976287  
0.748433 0.4998165 0.6208206 0.5216102 0.1303552 0.9331761  
0.4462742 0.9271383 0.02822903 0.2926233 0.916569074 0.7852009  
0.6742227 0.121326797 0.2094353 0.9450972 1.100221 0.634528 0.2719971  
1.052805253 1.169032 0.2729136 1.122674 0.01948096 0.4474702 0.183340724  
0.2258172 1.266545 0.1056542 0.991623915 0.089476069 1.026481 0.3815385  
0.541774 0.808149673 0.8108623 1.151112 0.609723678 0.4901759 0.8023477

0.1021423 0.4953902 0.2615243 0.316953 1.615455154 0.6059786  
0.061494441 0.161271 2.352637 0.9879983 0.3157284 0.6874889 0.1881816  
0.448336 0.050702044 1.230778 0.7194545 0.122053973 0.5312363 0.06708453  
0.342371 0.3168596 0.4226261 0.1311309 0.2686962 4.286759 1.473980659  
0.1322921 0.39896093 0.557591 1.143469 0.6445563 0.63907414 0.430034201  
7.889121 0.8447427 0.7997574 0 0.5018638 0.176461729 0.2488043  
3.385452 0.1419216 0.957499331 0.1838455 0.1423979 0.568380598  
0.04393857 0.158202334 0.1730071 0.8528843 0.51555745 1.394171  
0.6221735 0.8307546 0.933843152 0.1093821 0.3333569 1.088937  
0.9309578 1.384623 1.05192 1.3564 0.3293421 0.4491998 0.920170011  
0.131362 0.336134817 2.607426 0.059511211 0.8360823 0.1985782 0.838153221  
0.3574163 0.2124355 0.4281011 0.784873551 0.1664777 0.2539296  
0.08047172 0.479062207 0.3826786 0.1443383 0.09969133 1.23720621  
0.944704772 1.032150505 0.188914 0.3181031 0.5329806 0.1115883  
0.2995447 0.3422671 0.2491114 0.2859666 1.364519 0.1873634  
0.3830572 0.116319209 0.715603 0.3935826 0.7917426 0.3326354  
7.178766 0.7855503 0.1357339 0.4047083 0.625987 1.168026 1.140830065  
1.091438 0.1543248 0.8063836 0.1057641 1.616008974 0.9204173 4.46999  
0.7492848 0.1350972 2.551738 0.1768407 0.2601011 0.270297285  
0.1243861 0.1067545 0.363625275 0.1488314 0.1788743 1.225988  
0.06741891 0.5261698 0.090034489 1.652010766 0.2754939 1.277439 1.14219  
0.178417616 1.114479158 1.895520403 0.160471 0.4625129 0.9640553  
1.501162 1.112197 0.607746 0.3095495 1.269496015 1.451015686 0.1184509  
0.793495385 4.89848 0.103816832 0.561532 2.057361 0.3950391 1.550533  
1.522653 0.502551 0.9211293 0.1626121 0.2836875 0.887265889 2.615833  
1.942078 0.1124869 0.3491749 0.721988239 0.4485297 0.6864534 1.06198  
0.924656709 0.6490745 0.1677461 0.3329078 0.195061 1.111857 0.1943392  
0.3470989 0.78038929 2.207445221 2.111992634 0.0991269 0.352956683  
0.199380636 0.6485828 0.9206941 0.406530818 0.3772372 0.1085878  
0.3115842 0.820497749 0.4929751 0.1794548 0.05937344 0.037389906  
0.1868571 0.2344932 0.1408502 0.3567848 0.532343 0.814256 0.1615293  
0.295661 3.159865 0.3247682 0.8139768 0.166728591 0.249435 0.5512538  
0.6718059 0.9361036 0.1207495 0.1863497 0.2050108 0.077238083  
0.204384298 0.283982412 0.0723758 0.8832107 0.07562322 1.159008  
1.029638 1.623818175 0.292198 0.7587152 0.1129153 0.2034938 0.1499951  
0.085190005 0.5984046 2.993311 0.184625 1.042914 1.962362 3.117362 2.517372  
0.849670736 0.2057756 1.156232 0.35037091 0.1915995 0.6903928 1.0748  
1.28595 0.3475739 1.591026697 1.181533623 0.196789612 0.5267728  
0.7240417 0.5558721 0.1077232 0.3869443 0.1369574 0.760421232  
0.286331 0.183039548 0.1693612 0.3997331 1.196507 0.8988714 0.2179496  
0.602872945 0.266141 0.2796021 0.3709969 0.9993455 0.3390759  
1.264897 1.039379 0.825616863 0.7932682 0.214125152 0.2280182 0.02019228  
0.565339087 1.665165 0.2820558 0.8318454 0.715683565 0.2322975  
1.217881 0.6094934 0.308669777 0.06606816 0.3541618 0.2070602



0.0715838 0.3562578 1.448756 0.3652241  
AC127024.5 0.4448278 2.85299502 0.8130912 1.945969476 2.04462102  
0.823619219 1.638049 1.159842394 0.1382135 1.636391 1.063701399 2.020235  
1.257596 2.566238 2.38506 1.876953 1.335415 0.755054245 0.6815463 0.8772033  
0.468557516 1.547887 5.04487542 2.392921 1.414427 0.951773812 1.081439  
0.6055053 0.6981903 1.788618 0.9210786 0.950130827 1.590749 1.327981919  
1.248623 2.19944784 1.663836621 2.565021433 1.770088 3.169156 1.74778595  
2.577716 0.354816074 1.069344 1.287666167 3.344682 4.086807 2.586038 0.542006389  
0.4118635 1.636602 3.01834 2.372948059 1.046875 0.892031105 2.289011  
0.8664868 2.763634 0.293019 1.187185 0.5858841 2.864907 3.39353648  
0.7996995 0.6992682 2.10621 0.3616066 1.403865 1.3677 0.7623339  
0.8256768 2.627203014 0.4486917 0.8284632 0.792934999 0.6227122  
1.192252528 2.01609 0.7647583 0.9849515 0.6071975 0.5986445  
2.609709 0.838819312 2.308505671 0.7084682 1.077948 3.612065 1.450248334  
0.8209203 1.007911 0.5267777 1.726880602 0.963797 1.871609 0.587858869  
1.737738 2.134139057 0.956806315 0.174951 0.376458919 0.655192 0.8921595  
0.427576042 1.906903 0.4671064 0.358085326 1.626543 3.691694252 1.144551004  
0.1627557 2.996125116 0.8019625 2.611025 1.857307 1.563065 1.061337  
1.633048014 4.044312 2.298397 0.5098784 0.5787268 0.4827763 1.008358  
1.198064 0.992077 0.5848222 2.685994 4.202518 2.653293086 2.192202213  
0.8015188 2.534005541 1.404413233 0.9688803 2.545211896 1.398209  
0.4998806 0.390788953 3.883491554 1.09676206 1.220091858 0.9247118  
1.020179 2.047306 1.086987 2.243367 1.12769 1.905560436 1.105877 1.718651  
2.570417927 2.006015 0.9145382 0.385812035 1.989023 1.992987 0.958363759  
1.188961 1.742829 1.134035945 1.733595 1.399754 0.480439 1.616102452 1.428955  
2.749935 0.499017727 0.1512739 1.314311508 3.325419 1.113365 1.181884477  
0.7035488 3.758736365 2.130408 5.65467 0.6678155 0.7063361 0.06999558  
1.781173503 1.563876 0.4134413 4.913889 3.61181 0.3597492 0.3865338  
1.923115 2.272405 1.950163083 0.342596101 4.977257 1.076781 2.497025 0.62478  
1.741993015 1.967969 2.858279446 1.087682 1.377272 0.526902228 1.278649723  
1.017904 0.5464199 1.326165881 1.725023 0.8422475 1.99985 2.11484  
1.178403 1.705835 1.595177 0.5762528 0.4709566 2.648815 5.01862 0.7147076  
0.4233538 2.045150637 1.322319 1.246388 1.0866139 0.5410736 0.7833618  
2.947681 1.792296 0.6558545 2.501791315 2.201008 0.8076246 2.041385  
0.2818414 1.695516 0.55260164 0.8167544 2.527418 0.8279674 1.41442899  
0.755123795 1.837194 1.009018 1.85067 2.377359431 2.553726 1.444458 1.743725011  
1.615317 1.687687 0.5277666 1.225141 0.4204012 0.9890355 2.6361962  
0.5994541 0.345983876 0.5489866 4.367162 1.701654 0.5471856 1.420896  
0.9341993 0.7657456 2.35341989 2.850572 3.180446 0.359704036 1.056781  
0.3235159 1.42594 0.9604943 1.304396 1.3551 1.498258 2.462608 2.887741869  
0.2392426 1.058196371 1.456535 1.40993 1.049078 1.863499788 2.569763948  
10.35554 2.082155 3.374734 0.604247 1.479038 0.520048587 0.495595 15.73115  
0.479093 1.311804229 0.7282759 0.3052068 1.28303138 0.2825256  
0.858299027 0.5065568 3.938762 1.450330807 1.616203 1.05571 3.50553267

2.157912089 0.131874 0.3709886 2.448292 1.374353 1.216902 3.787763 1.744334  
3.303572 1.444181 1.353822662 0.3959341 0.574109052 0.2465557 0.645735285  
2.314676 0.6998177 1.421016673 1.077278 0.5854128 0.3590474 0.792222111  
0.9232663 0.6122892 0.614453252 2.252525609 0.1025262 1.885198  
0.8522608 2.98322017 1.845407185 4.044265048 0.9679799 0.7244151  
1.1734 0.4158323 0.5617724 0.5590697 0.800895 1.068785 3.290205  
0.4800174 0.6773425 0.897521032 1.140586 1.405968 1.685953 0.9415591  
13.35067 1.6837 0.6982166 1.171026 2.264122 0.9779201 1.524109992  
3.593333 0.9037117 1.635762 0.5100483 1.948305191 1.321048 5.655527  
2.625386 0.2280277 4.341208 0.3553401 0.4515625 0.687964446 0.2453945  
0.4290208 0.555302494 0.7177409 1.293935 1.917515 0.4226669 1.0205  
0.651288444 1.35031183 1.503385 2.666469 1.145711 0.573613922 1.322975459  
1.291686734 1.301514 0.7318742 1.162292 2.062831 2.681791 0.6960797  
0.522482 2.864856114 3.253241745 0.1904103 1.957815856 15.62464 1.063897812  
1.586111 2.504035 0.7989047 2.980147 2.034811 0.6543606 1.893378 0.3920992  
0.5472344 1.81649265 3.15372 2.177113 0.4746606 1.152142 2.138817601  
0.6083548 1.27688 1.835977 1.771449898 0.7978861 0.9645264 1.053577  
0.6271227 1.755397 0.9840628 1.033872 2.993642111 2.087338915 3.644670762  
0.7512065 0.580274122 0.258869497 0.7819494 2.775036 1.816344912  
2.230723 0.6109434 1.03305 3.114974321 0.2641531 0.2403952 0.6084492  
0.495861366 0.7208963 1.625591 0.7410016 2.826698 1.240828 2.547086  
0.5992131 0.5132983 3.639041 3.915496 1.640069 0.328929724 0.8592166  
2.806118 1.033976 1.517762 0.6696633 0.5392041 0.5234117 0.266058209  
0.82137124 0.304335167 0.3490331 2.710459 0.8509522 3.167286 2.482721  
2.189278482 0.8219912 4.82665 0.8168028 0.1840033 1.249428 0.282445433  
1.662479 2.864732 0.7332342 1.487588 1.323568 3.157037 3.104518 1.02438658  
1.223905 1.719249 0.367319023 0.2917866 1.866497 1.364009 1.481776 1.106278  
2.544919862 1.912886129 0.632680021 0.2988668 2.318706 0.9494142  
0.7792442 1.541514 0.5403916 1.248387956 0.9589126 0.833670744  
0.3675357 1.131486 0.3155559 1.2346 0.6085108 1.409629722 1.732682  
0.9738329 1.192758 0.6693548 1.895342 2.149992 1.790149 1.812494938  
2.425122 0.679355832 0.7762025 0.1460663 1.393469753 3.244555 1.00016  
1.028611 1.442794906 0.3640837 1.876175 3.196476 1.190850672 1.083289  
0.4066545 0.1762147 0.1726068 1.513527 1.697688 0.8806487  
AL355472.1 0.4673816 1.618107866 0.9373451 1.345375216 2.97270117  
1.678034635 2.931395 1.101345995 0.6663092 1.709246 1.29577628 1.398462  
1.306192 1.620077 2.874516 2.262136 1.410198 1.020308085 1.013074 1.072543  
1.100467658 0.7738537 1.883996832 3.845319 2.689625 1.784368989 1.174206  
1.061477 6.377465 2.395193 0.8584773 0.736144841 2.328027 3.734516109  
0.7245635 1.469125159 2.727187371 3.858269448 0.8817809 3.891049  
0.970249174 1.889914 0.940787106 2.949128 2.069223544 4.134429 4.125625  
8.494638 1.152768576 0.7353853 1.458426 7.618198 2.564064655 3.574849  
1.172826984 3.45764 3.843042 4.356716 0.5778844 4.313186 1.925776 3.042729  
6.860559921 1.427869 0.4775698 1.864977 1.139823 2.25595 1.840686 0.5104322

0.9730062 2.653150181 1.275665 0.8986304 3.440372581 0.947064 1.328065642  
1.889865 1.997017 4.887979 0.9757399 0.7870874 2.553849 1.378581305  
3.709668243 1.1029 1.106693 4.845663 1.19298689 1.2928 0.952747 0.9405654  
2.332199378 1.283857 2.411261 2.972912053 1.360434 4.327662852 1.138923072  
1.05427 0.574705459 0.5264325 1.809144 1.832256292 1.908474 1.688894  
0.503499106 2.095534 3.966840537 0.820203272 0.8107782 4.702674358  
0.8284621 4.195803 5.788339 1.08146 1.56798 0.810426181 13.9687 2.248172  
1.566409 1.885811 0.8970193 1.643536 3.616322 2.30743 0.7283325 2.206635  
4.080096 4.449106047 1.429831655 1.288006 4.815966517 1.620288926 1.632285  
3.181145999 1.12343 0.6179126 1.193163627 4.660702819 0.601811835  
0.81693107 0.8977745 1.780709 1.769585 2.739207 3.064244 1.419517 2.806973373  
0.8624142 2.430382 1.25536319 9.356242 1.763548 0.749146326 3.245446  
0.7599492 1.443795836 1.728645 6.573748 1.354446691 2.116146 3.337736  
1.423457 1.851057735 1.894422 2.91533 1.042469728 1.316741 0.880017271  
1.760312 1.395521 2.32809693 1.901417 2.568789182 9.101428 5.064003 0.9926641  
0.5933224 1.096679 2.009677797 0.3712505 0.9253896 5.11124 1.658292  
1.156203 0.5972529 2.925982 1.590238 1.622874844 0.894622687 6.535143  
0.8342711 8.166013 1.111565 1.291987863 2.351558 2.066908859 2.565404  
2.997063 0.809895538 1.338690666 1.100971 1.191671 1.646752067 2.5354  
1.976044 2.92152 1.49532 1.14049 1.370601 0.6654927 0.7997387 0.4414706  
1.695961 5.352031 5.769866 1.190544 1.775752954 1.545388 2.133514 0.906650287  
3.246065 1.964535 2.639072 4.460708 0.8862591 3.163006442 3.785129 1.778491  
1.711522 1.887112 2.022825 1.213609307 1.895817 10.91515 1.381681 1.785870342  
0.520050475 3.218817 0.7153446 1.341192 1.503074062 1.282414 2.480477  
1.181273352 3.703684 4.861826 0.5371287 2.953122 1.125944 1.300367 1.675532775  
1.354636 0.595693978 2.279011 4.340931 1.367242 1.070456 3.710391 0.9650685  
1.918163 1.964593995 3.200247 2.508957 1.024687324 1.235055 1.148059 1.447215  
0.9997493 3.962954 2.359053 1.041139 2.655559 2.57010958 1.890225 0.463766062  
3.06077 2.69366 1.654604 1.238136682 3.296354413 5.245504 1.963917 2.383758  
5.987825 1.674528 0.873681625 1.08981 0.6149011 0.6873944 1.812890631  
0.915893 0.3065338 1.921200031 0.8228866 0.881187001 1.19708 4.985118  
1.764611187 1.402471 1.049139 14.88784484 1.658451302 1.271495 1.639447  
1.710565 1.472351 1.679732 3.450981 2.374822 7.529162 1.631767 1.661866369  
0.795311 0.81403084 1.981021 1.642975169 5.129425 0.9174178 2.664097345  
4.76063 0.7349476 0.9375819 1.662059025 0.6128115 0.7234722  
1.143304871 1.763448812 0.713939 2.773094 1.264196 5.645454041 3.034992763  
5.820495437 0.8692509 1.369534 0.1346859 0.6092635 1.51532 1.090915  
2.284431 1.301968 2.499411 0.6125562 0.9400336 1.307063781 1.127921  
2.089879 1.753046 1.008696 0.3698957 0.6764082 1.034347 0.7056705  
2.158752 1.382898 4.062052132 2.236536 2.520038 2.653397 0.9500204 4.435359122  
7.727237 5.499011 3.58378 0.6543403 2.142277 1.570294 0.7659547 1.571014829  
0.9420305 1.309894 1.080209483 0.7929476 2.009987 1.70117 0.7053308  
1.639899 1.962360399 1.817284887 1.095571 1.736123 2.124355 0.652922282  
2.5245823 3.552613722 1.752318 1.17609 1.517549 4.284326 2.047022 0.7947732

0.5997184 2.774832404 5.819646497 1.223924 2.681356499 1.419804 1.458220245  
2.610977 1.898054 1.654134 3.221669 2.381306 1.440984 2.457465 1.338933 0.7694591  
1.589246786 7.303726 0.1650248 1.116897 0.8901164 4.63593581 1.357777  
1.519919 3.319128 1.865041944 1.997224 1.449955 1.733364 1.354176 0.7436779  
1.769602 3.124991 5.978954087 5.115250897 3.128990008 1.015109 1.491960455  
0.594274323 2.771821 0.4459362 2.501817688 1.496515 0.9583842 1.987049  
2.874854092 0.504073 1.274805 0.6614201 2.173166334 2.461704 2.669043  
0.8434531 2.534517 1.375142 1.662804 0.9147639 0.3207742 6.609211  
1.914966 1.339363 1.350804732 1.656868 1.305326 2.409254 1.156951 0.9357564  
1.299716 1.799019 1.239877524 1.161518926 0.733580073 0.6450131 0.97223  
1.391862 4.141611 1.47533 1.31927825 1.383804 5.504412 0.6363959 1.133461  
1.10956 0.722077889 2.369094 5.709536 3.029851 1.992074 3.748691 2.319187  
2.755023 0.679929331 1.700983 1.941398 0.796858694 0.8791656 1.053836  
1.512413 4.409538 4.498223 1.648037916 1.667767733 3.261878126 1.410781 1.75344  
1.211559 0.4174038 2.803086 1.44731 1.347851909 2.188122 1.851900413  
0.853109 3.905869 2.137 2.579133 0.8445071 0.920243056 3.351526 1.324152  
1.28779 1.31764 3.911676 2.089036 1.414373 2.458998834 1.125209 0.327508585  
1.481197 1.916897 1.898490586 8.635454 2.314387 1.404993 2.86404014 1.192636  
2.556138 2.745423 1.614638183 1.100799 1.470321 0.9674953 0.7489035 3.38532  
1.57391 0.9586596  
LINC01268 0.02295245 7.148356136 1.161951 1.540579017 3.943038649 1.608075419  
1.042584 1.856589822 1.32113 1.008474 1.685955197 0.8391407 0.1388805  
2.588221 3.211131 4.773796 0.5118687 2.572665772 0.9314796 0.8186585  
0.682996333 1.401694 10.104348623 2.308669 2.84631 1.737951647 4.416165  
1.273869 0.1725435 7.511893 0.07414098 2.617601806 2.786698 1.900339716  
2.471942 3.243984774 1.64062142 3.706219421 4.226932 2.627403 3.266678553  
3.317675 2.18368365 0.02423295 1.925909489 0.1366263 4.375617 1.147939  
0.967730507 1.818777 2.120752 0.1595507 2.291538075 1.000668 0.965530583  
4.176352 3.469898 4.147565 1.076566 0.7357496 0.7145447 3.191828 6.737166259  
2.182942 0.8912053 5.276391 1.203464 3.190198 3.331405 0.1633507 3.415395  
2.166468096 0.6482508 1.521275 1.952018886 2.897815 0.867899254 2.777959  
0.1496206 0.2428993 1.751373 1.432836 7.03583 1.924565108 4.370212115  
1.42568 1.014302 6.695431 1.453406769 1.624439 1.630563 1.634254 3.555172178  
3.45365 2.732744 1.501911317 3.09343 8.095010215 1.343040411 1.452252  
0.549233748 0.8643302 0.7836755 0.621420861 2.569447 1.455659 1.170958511  
3.729333 4.348470819 0.97524032 1.299163 5.953276453 1.517761 9.284947  
0.4530347 1.579991 0.7234064 4.252793854 3.047547 2.203654 1.151791  
0.2641907 2.201079 4.063153 3.578359 0.3239768 1.191573 3.304826 8.266032  
5.997074659 4.13466141 1.478519 9.454921944 0.640112847 2.033577 3.691198813  
1.413536 0.3030687 0.832274084 10.164329206 0.336441994 1.284454841  
0.06461235 1.256545 5.331914 1.557686 4.037897 2.515138 3.529609766 2.727208  
1.694671 8.519507112 4.693175 2.409999 1.240060099 0.7030194 0.9629898  
1.258917765 2.231189 3.742601 0.991979684 3.002196 2.574479 1.112835 2.023944131  
3.462635 1.857412 0.440729558 0.5750055 1.307728024 4.992666 0.8812518

2.813107858 0.8955883 5.89024733 2.61409 4.3215 1.002305 2.444359  
0.6690612 3.558908049 0.5841118 0.4258971 4.695084 4.389234 0.2068395  
0.4437665 5.530481 2.052868 2.803138225 0.186717984 1.363959 1.560648  
0.08815553 4.190902 3.85153853 3.790984 2.701618758 2.241742 1.972798  
1.156349366 3.755656464 0.453005 0.6676042 2.742828743 2.201335 2.547984  
0.1402436 3.957875 3.184256 2.025773 1.553577 0.6852284 1.430363 1.568557  
3.496457 1.38687 0.07691055 3.944060012 4.05695 1.472179 0.841014583  
1.651384 0.4776943 4.279327 5.835249 0.3499478 3.701807155 1.476393  
1.610168 3.557259 0.01575447 1.671514 1.099667235 2.906717 4.423783 1.810339  
3.862854344 0.343711521 2.986746 1.114778 3.462514 2.875663474 1.753137 3.48144  
1.312996823 4.565331 3.796567 1.003044 0.9964331 1.686106 1.047911 1.590158232  
1.803176 1.516803359 2.040716 5.760663 1.288193 1.160968 3.087676 1.244333  
3.391582 0.410033229 3.608122 5.527395 1.157058863 0.4027658 1.537141  
3.070844 1.456953 1.196239 2.961742 2.016794 5.949988 3.479223003 1.049802  
0.526985634 3.081356 1.203208 0.2671458 3.461536057 3.318969557 0.7927838  
2.31513 6.026182 0.2026585 1.240137 1.181293668 1.386606 10.05306 0.5910843  
1.09111638 0.143368 0.8700888 2.288499528 0.7758174 2.047040584  
0.7895083 2.741413 2.988049968 1.219632 1.262556 0.41990047 3.477111025  
2.10089 1.145755 3.022722 2.051203 3.730791 3.867849 3.006417 0.1864399  
0.9081826 3.228862954 1.434158 1.353517098 0.1171475 0.324859929  
0.1126915 1.494745 1.445671699 1.150165 1.233271 1.226789 1.417085503  
0.9155002 0.7610244 0.564012797 2.101770231 0.01719314 1.619601  
4.166667 2.837065463 2.495067546 4.374784769 1.613706 1.614981 2.28632  
0.799879 0.5114066 1.946496 1.262478 0.9250577 2.828979 0.8949324  
2.235599 1.279333971 2.290344 2.446154 2.615216 1.473685 3.489506 2.011731  
0.9184051 1.145523 2.910897 1.416894 2.2504016 0.6789682 1.230213  
1.071359 1.512372 3.702840646 1.524149 3.738637 5.619288 0.7702452 3.565477  
1.078557 1.998294 0.291456673 0.5075347 0.7434284 1.12726035 1.978444  
2.574907 3.429951 0.757862 1.974965 0.582495363 2.813525414 3.048775 3.823936  
0.173656 0.713425809 3.584369105 4.098918909 1.038198 2.811141 1.065918  
0.06526918 5.516604 0.8539659 1.426916 4.369868883 2.666002813 2.90571  
2.462370941 5.58347 1.458767796 2.205713 3.058244 2.292989 2.180754 4.068771  
0.7112328 3.22395 1.758896 1.651833 3.019092103 5.205676 1.611912 0.983607  
0.6836611 4.337395353 1.80232 0.7771998 3.078844 2.791372238 2.099656  
2.144443 2.263184 0.1248839 3.489641 2.707155 2.86482 7.150186503  
14.164810681 1.590777413 0.9218981 1.589382403 1.587607629 1.46556  
4.983581 4.211107224 1.314732 1.297728 0.7874428 2.710655635 6.063176 1.50771  
2.052683 2.184669786 1.020016 2.868265 1.806982 0.2541865 1.815325 1.931001  
0.9696812 0.8273014 8.155729 0.8678664 0.996426 1.054167032 0.03362016  
0.3715044 0.1502737 5.658204 0.9423373 1.44675 1.667698 0.42385825  
1.779599922 1.263129028 0.7023736 4.537191 0.6982132 0.9477174  
2.671516 3.311241678 0.2822518 2.480436 1.137298 1.151974 1.780945 0.98604725  
0.2104072 7.28713 1.185684 1.698712 0.327385 3.771485 4.118277 2.375108952  
1.331305 0.966227 0.622135762 1.476091 2.402505 1.720106 4.238078 1.017535

1.668864099 2.764182134 0.892985939 0.04385368 2.790468 1.606169 3.465319  
1.489801 1.470074 1.576656213 1.067745 0.682565141 2.554384 1.53904 0.113394  
2.424626 0.1345129 0.923390613 2.173836 0.7725677 1.875184 1.638814  
0.1059465 2.43157 4.673101 2.810259623 0.7560832 3.727614352 2.321282  
1.339038 3.342612096 5.55658 9.023437 1.621435 5.080942353 3.865254 4.021734  
1.706681 1.123311501 1.218206 0.8251471 0.3102786 0.631008 3.848323 3.77767  
1.595902  
AC136475.2 0.1613112 3.708593842 3.083181 5.066955404 2.122859069 2.461402845  
2.544826 2.071147133 2.850653 1.687528 2.264654592 2.710667 5.169507 3.24053  
0.8834457 4.129296 1.933626 0.647189353 1.72699 1.842944 3.355850119  
2.026995 2.596029957 7.105509 4.056374 2.056511272 1.82571 2.205769 0.6929407  
2.529617 0.6079119 2.479550601 2.008727 3.599779559 2.125633 3.716536862  
6.98098308 2.038808564 4.589585 7.721956 1.685365023 4.329182 2.383603695  
0.1021864 2.912163927 9.349488 2.778804 6.454229 5.335802394 2.211315  
3.997986 5.95466 2.844907556 10.24068 3.775203071 6.58254 1.307157 9.730191  
1.004636 2.676698 2.762025 8.344219 3.805999727 2.670425 2.142758 4.356722  
1.442453 4.929898 4.070129 0.5490619 1.816489 3.664483366 1.179665 1.122864  
3.02787893 1.048444 1.021930738 2.69292 3.755509 0.4779912 2.719377  
3.271165 2.28708 0.179746995 6.89253836 2.296196 1.023409 4.789211 2.075482947  
2.128529 1.991472 1.24169 4.28702046 3.616956 2.624171 1.630196863 0.5251405  
5.150243744 2.338859881 2.216567 1.375419549 1.801778 3.154421 1.511786721  
5.401697 1.192789 1.582609252 6.643388 12.371305866 1.604139052 0.5754577  
5.337781042 7.291312 9.653382 5.903584 2.763276 2.421021 2.434133542 5.447441  
5.770976 1.802784 3.22089 1.351343 3.327582 3.778063 0.1230772 0.792643  
6.366841 3.817912 6.390151515 2.553270812 2.164816 3.216237802 3.225520502  
2.90999 3.832967915 2.919118 0.7704204 0.276343617 4.287290405 0.535961251  
4.593500596 0.3632796 4.228967 6.836541 7.803014 6.169259 2.968242 3.334730763  
1.456691 3.605484 1.841412842 6.054741 4.034233 1.023090844 7.645715 2.14982  
3.670875468 5.805282 9.414388 2.167365995 2.514666 3.512286 3.220443 2.755724849  
4.29452 3.691133 2.823014568 3.268596 1.600643658 3.31983 1.942027 1.348001881  
3.35442 8.299771309 8.144913 7.358645 2.794092 1.778453 0.8661953 2.635216421  
2.220145 1.705445 18.00263 5.472997 1.02969 0.3153861 7.667619 7.60261  
3.201351898 0.454245723 7.296797 1.812947 10.17115 3.313565 4.200883155  
3.865653 6.982368362 7.484707 2.637722 1.592979251 3.059626123 4.844832  
0.7819938 2.51024256 2.231411 2.660299 1.371326 3.622418 0.8206738 6.44164  
2.4585 2.346172 0.555056 3.463266 8.65712 2.206113 1.954231 3.149013625  
5.135791 3.576591 1.034372847 1.360414 1.119088 7.245882 4.430782 4.954044  
9.365949839 4.732994 1.339631 8.629925 0.0553617 1.937733 1.606491912  
1.443905 11.7288 3.26524 7.93812188 2.28848742 5.954476 1.853752 3.079267  
1.837303541 4.467595 7.310291 1.934215978 10.3082 5.433528 1.492825 2.635147  
2.023181 2.914122 5.889284794 3.090935 1.106795358 2.156733 7.322553 4.297546  
1.962731 3.907463 4.592829 3.716118 3.746260233 4.878328 3.816535 1.926985908  
2.830663 1.048538 2.034376 1.878109 3.795269 1.171194 2.768017 10.46377 4.974214704  
4.511432 1.625087284 12.01642 7.126858 3.022344 2.872042255 2.709845065

0.7959619 2.400621 2.360194 0.5934569 1.743152 1.727304234 1.967475  
2.104572 0.8469681 3.153952168 3.843804 0.7194161 1.683978686 1.040552  
0.95536856 1.439856 3.902661 3.955851273 7.65734 3.601717 0.59021724  
6.468710073 1.865076 3.607201 5.018239 2.8616 1.618079 5.699762 7.081165  
2.096498 2.233967 5.22994588 1.586564 1.393058728 0.6780281 0.549643725  
8.404033 2.213897 2.2330262 2.962513 1.164292 0.5818491 0.570588544  
0.9462046 1.061216 1.677041583 2.518620668 0.3625034 1.401468 2.395228  
3.192101657 6.049063508 3.876018543 2.48299 2.360437 0.5268327 1.181977  
6.573596 2.07084 1.321477 2.275477 1.974123 0.7321273 1.0523 2.975041813  
2.860865 2.236995 3.448057 3.370184 2.278822 0 1.440072 2.070207 3.308853  
1.936282 3.592544981 8.648943 2.819353 4.146724 1.174933 4.401082262 0.9964479  
5.506235 8.084857 1.420519 5.27757 2.722159 1.034831 5.46233425 1.09259  
4.382141 1.274481852 3.06642 9.454967 4.943594 1.379473 3.933259 3.869932675  
1.472081022 3.172841 4.76812 2.103355 1.464764123 5.700902062 2.693379756  
1.16081 3.737786 3.681456 4.036699 3.687462 2.892918 1.935316 5.827823739  
8.970529125 2.524637 4.719734653 2.192233 4.204184422 2.826814 2.004578  
3.548981 10.47309 4.874541 0.8283374 7.681445 1.444115 1.343656 3.901134214  
7.288009 1.500799 2.477438 1.723465 6.50705056 2.921068 0.891789 3.53046  
1.943795393 4.195478 4.437044 3.488631 1.524412 1.880783 2.733787 4.003617  
6.854829486 7.872249624 4.177819763 1.207296 2.826763935 2.876621244  
4.770549 0.2378602 2.888235532 3.981887 1.954395 1.180629 2.579776031  
2.140347 0.4533166 2.066938 0.850048056 3.504715 2.207422 1.237208 1.979566  
1.714543 4.190185 1.588985 0.6049587 3.618734 3.450986 3.20044 2.541373698  
0.2025296 1.682616 3.290259 2.889586 0.9951364 4.095383 2.844493 1.693270458  
1.045488249 2.46593004 2.056802 4.335352 5.157812 7.246165 4.632934 3.870331602  
1.476229 15.96465 1.487748 1.590315 2.170059 2.178864768 3.770825 5.875624  
3.827034 3.381226 0.5459719 5.811526 10.10292 1.942198779 0.7017369  
3.997752 1.212152775 1.003016 2.853794 3.53668 4.948075 4.385603 4.431904685  
4.125205801 1.118487894 0.3522358 3.954466 1.645518 1.530658 3.920429  
2.547561 1.793164396 2.802765 0.520168511 1.203242 9.878054 0.1593879  
5.108892 2.836095 2.024769478 2.647153 3.13419 4.744407 3.82608 4.555193  
2.239278 3.270219 3.992158053 2.978948 1.184990672 0.4955221 1.09028  
1.927921661 14.10078 2.923324 1.575979 3.567583204 2.607599 6.008714 8.140779  
2.587707878 1.351836 1.821231 0.4845904 1.790179 2.506961 2.308669 3.013279  
AC005253.1 0.3871146 0.949320946 0.2203789 1.076216583 0.595709173  
0.597648729 0.5930866 0.543694236 0.3191136 0.07556346 0.380271836  
1.55002 0.559473 2.700129 0.4641391 0.967836 0.5285601 0.356584839  
0.3540566 0.6428212 0.499304745 0.6353478 1.049945988 1.980348  
1.382477 0.561583015 0.7760556 0.2923129 0.5175412 0.8718135  
0.3657801 0.548426339 0.7148831 1.134458917 0.5685677 1.749832565  
0.983434707 1.370378418 1.038062 1.35654 0.961151254 1.465569 0.18841957  
0.7473581 0.610674858 1.079149 1.475857 0.6848815 0.191391973 0.2113176  
1.147339 2.787552 3.86347791 0.6888654 0.280849373 2.388807 0.4801402  
1.405392 0.227562 0.4171129 0.3935173 1.186071 0.846701876 0.3795342

0.1775953 1.190917 0.1798233 1.065001 1.918368 0.3129087 0.6989987  
2.187029157 0.1275028 0.04781984 0.51261405 0.5134808 0.218966918  
1.086129 0.2059994 0.4548202 0.1542118 0.2638703 1.066035 0.123244816  
1.101529842 0.2249148 0.1797478 1.035016 0.749403687 0.4018202  
0.2395556 0.2364927 2.34984442 0.8959593 0.8940531 0.255487125  
0.5863938 0.492739752 0.278185233 0.2019674 0.304214928 0.2016983  
0.8239434 0.378429371 1.869235 0.4583525 0.403047314 1.133106 2.33114011  
0.742782482 0.1878889 1.986796262 0.396773 1.321305 0.75369 0.320789  
0.7667575 1.009151374 1.152053 1.718891 0.2354461 0.1781588 0.383163  
1.011079 0.9195559 0.735388 0.9384336 1.163661 1.2533 1.18525634  
1.119475059 0.3778274 1.068864637 1.363543636 0.3535895 1.621479043  
0.7840032 0.1864391 0.216545123 1.214434058 0.413807399 1.23635162  
0.4003156 0.9909071 1.482532 0.9126127 1.519346 1.345226 1.226567637  
1.209062 1.261856 1.524402835 1.637998 0.5550301 0.311773144 1.547267  
0.5381413 0.451762426 0.6013134 1.050691 0.360902723 1.093019 1.490805  
0.5268982 1.754519469 1.171229 0.8465568 0.245793039 0.302699 0.576563039  
1.318789 0.4010118 0.668993371 0.6128364 2.264348961 0.9117744  
2.529554 0.1696071 0.3632283 0.2828157 0.822490913 0.4103122  
0.1363675 1.890902 1.505372 0.8424711 0.267734 1.549338 1.303196 1.543757283  
0.019775037 1.289315 0.6570462 0.9406451 0.4533636 1.15709641  
0.2912651 1.253871913 0.8668001 0.6094824 0.190414311 1.073529003  
0.2892534 0.234297 1.113422628 0.2817112 0.5678289 0.881493 1.230475  
0.6925549 1.350346 0.9703332 0.2177147 0.1026957 1.595817 3.592038  
0.2593092 0.2280736 1.728838225 1.505699 0.9634096 0.366674233  
0.2498511 0.5480792 1.001416 1.241441 0.3097364 0.756009167 1.034188  
0.4212797 1.075849 0.01084547 0.8659759 0.034023249 0.1257173  
0.5713846 0.5146747 1.384033964 0.224159687 1.767415 0.2809303  
0.8880954 0.998809991 1.004189 0.7585558 0.592057614 1.137048 1.216502  
0.1218532 2.404362 0.2750151 0.4670857 2.062166232 0.6055205  
0.125529382 0.5175728 2.577948 1.369487 0.1812657 0.57411 0.4991733  
0.3119979 1.6230482 2.308044 1.548739 0.067950088 1.892805 0.1120422  
1.143632 0.7560112 0.7246781 0.3963041 0.6824998 1.840397 1.077033469  
0.2393622 0.325761601 0.7113859 1.193614 0.4216352 1.323856383  
0.291454855 1.507329 0.8256142 1.995028 0.02325188 0.7683457 0.338382439  
0.2890743 4.221065 0.3792521 1.235731384 0.1462154 0.09689288  
0.451080747 0.1549232 0.451382647 0.1444752 1.690034 0.870633366  
1.656814 1.090447 2.42812008 1.137260885 0.2588053 0.2641046 1.245239  
1.269268 1.015793 1.389887 1.157877 0.9607639 0.2604992 1.050605176  
0.1371226 0.155944605 0.6261849 0.389291354 0.999888 0.1615771  
0.34267262 1.326543 0.2618779 0.2694201 0.172750082 0.4263359  
0.2577889 0.141867767 0.920129825 0.6312458 0.3147286 0.449048  
1.178175408 1.058532617 1.744383725 0.2892244 0.1279018 0.01290095  
0.3501514 0.2038215 0.381095 0.3698286 0.167164 2.527588 0.2412152  
0.2914502 0.699380144 0.5739541 0.4463473 1.23075 0.4669891



3.720216 0.8746657 0.564226 0.3304545 1.101262 0.5870453 1.853877748  
2.652527 0.3927588 1.168646 0.3372283 1.368243813 0.3050097 2.346608  
1.642501 0.1805077 1.633699 0.2379234 0.4286195 1.747244036 0.2392218  
0.2839556 0.276665347 0.3210734 1.752664 1.217493 0.4804296 0.7450613  
0.357134555 0.989857526 1.210843 2.88717 1.983952 0.176584796 1.250454784  
0.745576301 0.4710532 0.4184228 0.6457298 0.2426311 1.15581  
0.3721799 0.2584993 1.74876781 0.935361068 0.1318884 1.212260792  
2.984767 0.419028806 1.572017 0.8399435 0.5533643 2.264376 1.680069  
0.4252671 1.261015 0.1357945 0.3895729 1.071800261 1.656174 0.1896837  
0.3444314 0.9310413 1.722627753 0.4369858 0.3384876 1.104368  
0.267965797 0.4251221 0.3232658 0.2316712 0.1447929 1.208513  
0.3894941 0.2841728 0.918289619 0.963868645 1.832852237 0.1419071  
0.652018158 0.179306908 1.49742 0.2329865 1.065056487 1.3101 0.3291339  
0.2601985 1.214863967 0.175343 0.1110071 0.2148541 0.166526156  
0.197652 0.4977122 0.2281144 0.6526409 0.3951558 1.225173 0.4911391  
0.2896976 0.8577026 2.279721 1.676066 0.320655796 0.6017522 0.6478893  
0.4456276 1.347799 0.8739104 0.2835694 0.194699 0.104428844 0.174470581  
0.193232299 0.241759 1.374532 0.2947076 0.5448734 1.379315 1.70110296  
0.4428319 1.626663 0.2343052 0.2973847 0.3567963 0.142281357  
0.7387124 1.065148 0.7134468 1.00585 0.9473336 2.443588 1.604743  
1.048892797 0.3360419 1.040648 0.51733057 0.1291239 0.8036547  
0.9573827 1.127727 1.377734 1.57858038 1.869989739 0.267806086 0.1466329  
1.561973 0.3481493 0.4464568 0.9553422 0.2703308 0.891722394  
0.3099574 0.090579624 0.09428703 1.151403 0.6453048 1.070521 0.1915851  
1.403553732 0.5333993 0.2334908 0.5765965 0.9736252 0.2917369  
0.8427255 1.122847 1.145666793 1.387979 0.439187758 0.2688198 0.01124148  
1.244957723 3.062018 1.210028 0.2612395 0.960166713 0.2715826 1.666801  
2.366744 0.352278446 0.537011 0.1502244 0.1288366 0.3586703 0.6988998  
1.839244 0.4132153  
AF117829.1 0.2578047 0.580393366 0.3624114 0.371707676 0.61029792  
0.334247821 0.3494621 0.397208423 0.3883686 0.3410696 0.599689981  
2.460701 0.3239184 1.129748 0.7175266 0.8481036 0.3793643 0.294613466  
0.3030471 1.109368 0.358366787 0.5480608 1.070691228 0.6294971  
0.4280149 0.316749035 0.3375391 0.5405112 0.2155888 0.365741  
0.3572224 0.272427566 0.4473384 1.112621985 0.4883668 0.775704368  
0.916553572 0.860184769 1.167477 0.769669 0.494547961 0.7462059 0.333065151  
0.726428 0.541607192 0.3575002 0.449766 0.7515506 0.401668684 0.1893511  
0.808566 2.330024 0.563439672 0.724094 0.355572351 0.6954969 0.5522351  
1.335132 0.4606206 0.5578418 0.4539212 0.9741126 0.956598265  
0.4609416 0.3260416 0.6928326 0.5067542 0.8386675 0.6588215  
0.687877 0.2991464 1.140192621 0.3346468 0.243024 0.452472177 0.4189011  
0.498671054 0.8611702 0.1948186 1.155715 0.5887242 0.2453474  
0.4339094 0.623984691 1.172202051 0.1586027 0.4844835 0.5855543  
0.441413642 0.511027 0.4064235 0.3162825 1.236639961 0.5638801

0.8449585 0.275483876 1.994986 0.558567608 0.347968326 0.3133262  
0.246436922 0.5691701 0.4250309 0.325668799 0.6879871 0.5961678  
0.561144739 0.8434298 0.846020079 0.67053718 0.1105634 1.693240108  
0.4221532 1.206044 1.080967 0.5148232 0.7928755 0.320351021 0.7882111  
1.160212 0.3167351 0.2740075 0.5571594 0.8308947 0.7718764  
4.282252 0.9281952 0.8387062 1.070572 1.079325264 0.425260718 0.284619  
0.619945851 1.412167954 0.1968752 0.820845863 0.505755 0.2968351  
0.557489355 1.105042492 0.455952882 0.935577723 0.5187212 0.6908562  
0.8582212 0.6834897 0.9975051 0.8124917 0.640111399 0.7170977  
0.8002789 2.088518883 1.326469 0.4953983 0.391149764 0.5877181  
0.638346 0.448820669 0.4860101 0.4335134 0.497809483 0.790602 1.815321  
0.2225265 0.857896147 0.5934623 0.584957 0.271194556 0.3721285  
0.470769832 0.9277715 0.781085 0.522695342 0.7109784 0.952517909  
0.3176848 1.747881 0.2701345 0.4520702 0.4344292 0.737227017  
0.478507 0.3647524 1.058597 0.6923319 0.7648938 0.161588 0.394198  
0.7220498 1.083916335 0.243311467 1.889248 0.4559874 1.287767 0.4988385  
0.738159532 0.8413945 0.714092272 0.8645607 0.6591795 0.3876458  
0.643683312 0.2079286 0.7881857 0.657676169 0.5066734 0.3994692  
1.322612 0.5015232 0.7062387 0.5847794 0.5872857 0.3073451  
0.5930028 1.183409 1.465134 0.3762222 0.3355253 0.682434132 0.4751226  
0.5923535 0.485223782 0.423254 0.4192729 0.6293325 0.7316066  
0.1896288 0.836127115 0.9204841 0.4451897 0.707081 0.327804 0.8376726  
0.134231747 0.7089602 1.378745 0.153397 0.850623717 0.453013714 0.8745764  
0.2584172 1.297537 0.823139493 0.8008661 0.4372773 0.361065715  
0.1751817 1.131228 0.2238052 1.539688 0.376456 0.4608712 1.270828473  
0.5067134 0.289977129 0.778367 1.304015 0.8857429 0.2909071 0.8226512  
0.5587963 0.5118418 1.751616354 0.561885 0.6570909 0.175692895  
1.032342 0.3013528 0.4009091 0.3437673 0.4153611 4.493947 0.4276251  
0.8544602 0.535010056 0.1108108 0.312890038 1.051728 0.6578792  
0.4175185 1.153044446 0.838044717 13.95826 1.495517 0.8176146 0.1492646  
0.423486 0.686122116 0.3688851 11.01208 0.2472635 0.738832831 0.3206965  
0.2897955 0.542042598 0.2050114 0.541834007 0.2741876 0.826599  
0.578348732 0.4311834 0.8218239 0.58761368 0.651839622 0.3501951  
0.3933044 0.7340765 0.7893391 1.14847 1.177948 1.00243 1.120131  
0.2926464 0.531835205 0.2396245 0.492197946 0.6521976 0.394352262  
0.4634222 0.2888799 0.390030865 0.4856605 0.2553307 0.3880361  
0.217443666 0.5379491 0.409268 0.25364207 0.745476122 0.3397988  
0.8006328 0.3009505 1.452047614 0.74611982 1.388772332 0.2355996  
0.2500026 0.3140151 0.3549928 0.2577199 0.6938114 0.5465378  
0.1660754 0.761044 0.3679365 0.3859793 0.422636307 0.5833755  
0.4645275 0.7043307 0.480254 11.6509 2.066589 0.5713318 0.3314594  
0.4567588 0.8696574 0.927462032 1.143938 0.2692013 0.691884 0.4066205  
0.967576642 0.2871731 1.166749 0.8437968 0.4848293 1.013282 0.193112  
0.3981629 0.885502722 0.2694168 0.3567966 0.344740027 0.4626435

|             |             |             |             |             |                                   |
|-------------|-------------|-------------|-------------|-------------|-----------------------------------|
| 0.8257245   | 0.6266335   | 0.8292535   | 0.5263227   | 0.718955059 | 1.092415086                       |
| 0.8355933   | 0.7126309   | 0.7728626   | 0.307011114 | 0.684256489 | 0.93269523                        |
| 0.7125301   | 0.5940302   | 0.6146078   | 0.3966012   | 0.4112844   | 0.3031744                         |
| 0.2927044   | 1.221498145 | 0.507957744 | 0.3292538   | 0.632017817 | 12.15343                          |
| 0.575863541 | 0.5542682   | 0.8373918   | 0.3244891   | 1.054066    | 1.128232 0.4310505                |
| 1.717947    | 0.3390052   | 0.3069735   | 0.902426879 | 1.707037    | 0.5175085 0.4250436               |
| 0.4159667   | 0.589778373 | 0.421617    | 0.4001189   | 0.4341392   | 0.364032795                       |
| 0.3809307   | 0.4169601   | 0.3903912   | 0.2638404   | 0.8140388   | 0.6525779                         |
| 0.5503113   | 0.60216985  | 1.022659349 | 0.961993987 | 0.3268517   | 0.305797714                       |
| 0.155300936 | 0.3380329   | 0.4019554   | 0.763831185 | 0.782432    | 0.1742753                         |
| 0.398251    | 1.637742508 | 0.1774056   | 0.296919    | 0.106096    | 0.306226375 0.30051               |
| 0.3011723   | 0.3794402   | 0.7766959   | 0.3567217   | 0.7570015   | 0.2460851                         |
| 0.5001473   | 0.8872322   | 0.7842961   | 0.8833369   | 0.37692887  | 0.5217779                         |
| 1.191789    | 0.3597147   | 0.4662547   | 0.3578196   | 0.3644427   | 0.2226768                         |
| 0.310542316 | 0.265798851 | 0.293666554 | 0.3276367   | 0.7353131   | 0.4035226                         |
| 0.6903541   | 0.8592534   | 1.016615538 | 0.3094142   | 0.682692    | 0.2201142                         |
| 0.2196923   | 0.8893731   | 0.258470984 | 0.236332    | 0.9695898   | 0.5304456                         |
| 0.3849712   | 1.009475    | 0.9247026   | 0.8269885   | 0.750898112 | 0.3309354                         |
| 0.5538304   | 0.512665604 | 0.1816987   | 0.828685    | 0.6486197   | 0.5710855                         |
| 0.8384704   | 0.851507062 | 0.952604856 | 0.231176425 | 0.7244353   | 0.865909                          |
| 0.4362944   | 0.2887401   | 0.3682676   | 0.3541211   | 0.749276827 | 0.2392449                         |
| 0.293764759 | 0.2345429   | 0.5797168   | 0.8685908   | 0.247371    | 0.3330907                         |
| 1.262279041 | 0.4042384   | 0.5528296   | 0.7366049   | 0.4071692   | 0.7642651                         |
| 0.5033132   | 0.6154131   | 0.504617121 | 0.7762568   | 0.248371257 | 1.024622                          |
| 0.1533491   | 0.839978899 | 2.169029    | 0.6670761   | 0.2667982   | 0.614977758                       |
| 0.1591212   | 0.8211368   | 1.114079    | 0.298767258 | 0.7496745   | 0.198397 0.1614222                |
| 0.8506349   | 0.6315542   | 0.5463943   | 0.3982439   |             |                                   |
| AF127936.1  | 0           | 0.725141265 | 0.1175002   | 0.30083249  | 0.194165449 0.606160044           |
| 0.29697     | 1.004640463 | 0.1837543   | 0.5982832   | 1.254520889 | 1.095019 0.1835088                |
| 0.5605107   | 0.4756393   | 0.3951053   | 0.1268164   | 0.228145887 | 0.4304038                         |
| 0.5070603   | 0.47918887  | 0.3201193   | 0.236167033 | 0.4131661   | 0.3760951                         |
| 0.913885454 | 0.4274447   | 0.585467    | 0.1954192   | 0.07926537  | 0.02449141                        |
| 0.451141256 | 1.114097    | 0.823922019 | 0.2536173   | 1.620617682 | 0.486654257                       |
| 1.050813365 | 0.8707305   | 0.2603775   | 0.739351179 | 1.991981    | 0.613244702                       |
| 0.01921202  | 0.323881966 | 0.08551427  | 0.7314186   | 0.1011214   | 0.084775946                       |
| 1.308086    | 0.3560493   | 0.3053272   | 0.543935501 | 0.1391816   | 0.188674205                       |
| 0.6695109   | 0.1151991   | 0.302311    | 0.5843515   | 0.3088093   | 0.8497427                         |
| 0.3064619   | 0.036384633 | 0.3543992   | 0.2556605   | 1.228658    | 0.5916981 2.03784                 |
| 0.8637173   | 0.4786067   | 0.256138    | 0.336467872 | 0.3212106   | 0.3304317                         |
| 0.23192493  | 0.2956763   | 0.342236517 | 0.4020576   | 0.08472861  | 0.07702879                        |
| 0.2018167   | 0.434125    | 1.289979    | 0.658986107 | 0.068203333 | 0.02943456 0.5772322              |
| 0.836102    | 0.91814283  | 0.4365642   | 0.4532403   | 0.6614407   | 0.41521262                        |
| 0.286621    | 1.2656      | 0.045973897 | 2.339935    | 0           | 0.824490174 0.3198205 0.625625972 |
| 1.161434    | 0.8754716   | 0           | 1.200894    | 0.4140108   | 1.279446597 0.4474104             |

0.887004981 1.501113248 0.2596598 2.732754841 0.4823314 0 0.1496535  
0.2308988 0.3413814 1.340992961 0 0.9133919 0.3788161 0.06411793  
0.6017338 1.340609 0.2798199 0.4859337 0.6608912 0.5817953  
1.978811 0.191714327 0.291452496 0.5550085 0.259150096 0.957519149  
0.2077618 1.409937525 1.088792 0.3578559 0.311731504 0.39213327  
5.583613916 2.478220153 0.1280626 0.6781619 0.3917867 0.6897284  
0.173982 0.02498767 0.287890426 0.6270223 2.124994 2.646779898 1.528641  
0.5384591 0.106861607 0.8340026 0.3817319 0.238901469 0.3763616  
0.06436346 0.835345474 0.5318789 0.03001561 0.03992137 1.828597784  
0.308716 0.5077818 0.353835879 0.5698346 0.640703221 0.1040267  
0.296043 0.202749827 0.6377493 0.229757539 0.5526575 0.7831108  
0.1331787 0.4481931 0.6746768 0.428266851 0.04725379 1.020813  
0.2785387 0.7795273 0.2049794 0.3360084 0.5167949 0.2436415  
0.810229626 0.427012766 2.178849 1.482704 0 0.1186633 1.157986723  
0.1006311 0.725468337 0.5131214 0.1907373 0.578685988 0.849980104  
0.026025 0.1297256 0.667853321 0.1957791 0.447906 0.3867336 2.061893  
0.5162933 0.3471277 1.345881 0.3134152 0.4696013 0.4677112  
1.213134 0.6334675 0.04690394 0.613972352 0.1398423 0.1080697  
4.27838438 0.1678496 0.299819 0.6998092 0.3777692 0.07926875  
0.195654268 0.1283435 0.6760548 0.383502 0.06245119 0.3415429  
0.416319739 0.3016311 0.07000401 0.931429 0.604439439 1.434191956  
0.4919009 0.4537377 0.7236646 0.388609526 0.6100694 0.489514  
0.568204934 0.5499844 0.1368155 0.3976095 0.02036025 0.4191914  
1.105727 1.961649271 0.398486 0.459984319 0.3801436 0.5387127 0.1939152  
0.332111 0 0.816181 0.1497141 0.690787996 0.5710697 0.1153198  
0.260850121 0.191589 0.5197201 0.7483348 1.958994 0.9483852 3.062721  
0.02691795 0.04307931 0.177195804 0.1325301 0.660801762 0.4096355  
0.6040044 0.1033145 0.714668153 0.029969227 0.5985939 1.143394  
1.084696 0 0.893807 0.502838346 0.3814637 3.504592 1.182912 0.348807801  
0.3367792 2.561432 0.814124948 1.197278 1.141105469 0.2773093 0.278048  
0.936558944 0.4297473 0.7202491 0 0.249472727 0.4821466 0.4110233  
0.4245647 0.7308791 0.725966 1.663618 0.5475619 0.1266948 0.3000052  
0.124993219 0.7106304 0.561232293 0 0.119236491 0.02481736 0.3917495  
0.146940621 0.1670943 0.2188981 0.3878486 0.409599729 0.9339516  
2.609705 0.623433902 0.383939063 0.1135902 0.5205524 0.7118052  
0.521865853 0.172509062 0.413602756 0.3785076 0.08498005 2.488621  
1.723584 0.1867186 0.3362462 0.4791542 0.4812879 1.232762 0.6569514  
0.573061 0.223734559 0.213852 0.02336536 0.9394388 0.2086332 4.406815  
3.217805 0.4206253 0.324349 0.3210818 1.040113 1.013149376 0.1345725  
0.6007408 0.4103283 1.202099 0.755493883 0.1053797 0.5720981  
1.576328 0.1732354 0.1136146 0.3306964 0.3168518 0.505462405  
0.9243782 0.2471653 0.466277475 0.149099 1.433568 0.5311103 1.145481  
0.4766963 0.631374949 0.381487378 1.231784 0.7640219 1.362109 0.571963235  
0.219861389 0.132099451 0.6079636 0.1621707 0.9174998 0.05174578

0.5051027 1.509921 0.347319 1.773969049 0.285624645 0.06328746 0.414099181  
3.091206 0.249608526 0.6686213 0.2826599 0.4289415 0.1800952  
0.3087541 0.3866533 4.574598 0.1303236 0.09094327 1.234343782  
0.4110647 0.7645752 0.991665 0.2945709 0.859678 0.4643142 0.2829345  
1.075934 0.162423191 0.08159898 0.2688766 0.1334026 0.1302746  
0.9123015 1.853436 0.4581764 0.142144158 0.300636871 1.227988607  
0.2269833 0.180010217 0.442499226 0 2.54904 0.709114992 0.5326811  
1.295727 0.291335 2.182601879 0.06584823 0 0.6661785 0.239725783  
0.05990182 0.3523725 0.7183451 0.490185 0.02844269 0.7760368  
0.5178236 0.3412141 0.07559519 0.2489653 0.8936338 0.510196032 0  
0.1309026 0.06873337 0.9313198 0.7548323 0.09956526 0.231958  
0.070744686 1.921937791 0.050576564 0.9744802 0.6434903 0.3030369  
0.1651332 0.8080006 1.875122472 0.7545761 0.3363757 0.3619788  
0.5708075 0.3934207 0.341372897 0.2710696 0.247315 0.5396393  
0.470891 0.04399198 1.818817 0.06160366 0.828993731 0.4617665 0.4015482  
0.24417466 0.2101283 0.8383449 0.7797812 0.4377814 0.08913896  
0.656492589 1.163367391 0 0.02483389 1.704558 0.4083727 2.609191  
1.402247 0.6186642 0.648330975 0.1784819 0.03259889 1.221594 0.2507178  
0.1198659 0.6018452 0.2574132 0.585655514 0.3839324 0.224084  
1.015882 0.3559619 0.2470442 0.09971186 0.4958326 0.276523582  
0.1816446 0.559984703 0.1934922 0.06473152 0.040274196 0.4044023  
0.8776077 0.06837674 0.620591089 0.4840479 0.271127 0.3907774  
0.09895198 0.8048338 0.189226 0.1171384 0.6195965 0.6798068  
0.759591 0.4909887  
SNHG22 0.1524151 0.261637267 0.2960389 0.709560938 0.355620548 0.52933337  
0.1392941 0.319370409 0.04925155 0.08017872 0.140612954 0.3433363  
0.2623239 0.6139969 1.214146 1.192766 0.6866083 0.373013686 0.2975095  
0.2922001 0.57796498 1.237991 0.417777932 2.065313 0.336015 0.650054539  
0.1874744 0.1961529 0.327363 0.7010996 0.2560123 0.344619376  
2.378762 1.183045983 0.2533683 0.934846322 0.693690896 1.115966867  
0.4226094 0.9516655 0.475602687 0.861144 0.240229502 0.1235852  
0.21702465 0.6112088 0.5974602 0.650484 0.590783398 0.1304579  
0.7157374 0.923585 0.291581314 0.7367687 0.397337419 0.7667347  
0.4508004 0.6295269 0.4319007 0.7633229 0.3321441 0.8683454  
0.468103112 0.1187367 0.186885 0.704584 0.5104694 1.378264 0.2985152  
0.1584643 0.1471125 0.742938214 0.2275338 0.05166313 0.231697258  
0.3011497 0.140008058 1.730198 0.1987103 0.9187458 0.1406413  
0.09696518 0.8464966 0.047553582 1.873750457 0.4891381 0.1813902  
0.5631227 0.725963107 0.2691276 0.2640906 0.709142 0.779024064  
0.9625449 0.3277189 0.708535235 6.239957 0.814808201 0.157848237  
0.07792843 0.268297756 0.06225966 0.3406239 0.545971568 0.3039929  
0.2427404 0.103676266 0.8943966 0.713229998 0.380296192 0.2609866  
1.086273041 0.4218576 0.6054122 1.133151 0.2630225 1.177303 0.641831103  
1.459883 1.046031 0.3366648 0.1031129 0.4085818 1.231963 0.7499995

4.51204 0.2813372 0.7689366 0.6395752 1.428504631 1.543975563  
0.7675942 1.041897321 0.256643197 0.2338822 0.394700341 0.298946  
0.1781294 0.09747871 1.033514894 0.071492302 0.585735062 0.2608664  
0.269517 3.089514 0.5105862 1.472247 0.6831376 0.252066035 0.2549881  
2.210876 0.386137055 0.1917841 0.5074576 0.206222708 0.5179519  
0.1384266 0.576293363 0.4842045 0.3709028 0.081913562 1.300852  
1.568787 0.1819016 0.275691263 0.4200896 0.9118727 0.124475382  
0.3997994 0.070252054 0.7319075 0.1825009 0.196992999 1.413067  
0.985308074 0.9443186 1.58472 0.8745472 0.7836981 0.1371838  
0.580692582 0.1203213 1.110217 0.8890914 0.7772425 0.3387997  
0.1589296 0.2989034 0.404879 0.52119669 0.625670588 1.449174 0.2466671  
0.7883313 0.2226366 0.620748764 0.638339 0.532413796 0.5626292  
0.4805579 0.261229147 0.538482645 0.285994 0.1738513 0.279246653 0.49476  
0.1380597 0.1101344 1.376595 1.746473 1.215728 0.2186275 0.1306736  
0.5081294 0.9070186 0.577151 0.4002142 0.05657234 0.705268224  
1.145874 0.2703478 0.186157859 0.3084933 0.587899 0.3151166 0.4751112  
0.5524051 2.281186909 1.176474 0.1225782 1.019991 0.02510812 0.2654761  
0.498854578 1.10759 0.450315 0.215607 0.834038536 0.442066302 0.7683315  
0.1427655 0.2715486 0.534681547 0.7962542 1.730885 0.20103016  
0.4983927 0.7920839 0.1003021 0.6985145 0.2996149 0.1281589  
1.00949664 0.3738208 0.308223198 0.5298261 1.628407 0.3811496 0.25433  
0.2426153 0.4565435 0.21669 0.168814539 2.212462 2.338787 0.635065591  
0.7588607 0.1537106 0.601727 0.5561829 0.7771105 2.430505 0.3463104  
2.892403 1.108185613 0.05683511 0.165687515 1.557083 1.451435 0.1661479  
0.657661907 0.473925249 2.446721 0.4758243 0.6277131 1.238089 0.1617074  
0.168469268 0.1858972 9.908453 0.3231522 0.271123071 0.06770002  
0.08836639 0.415636853 0.1258454 0.212395633 0.5680708 0.6520938  
0.812140506 1.508922 0.7127921 0.17845365 0.543286273 0.3524439  
0.3635488 0.2971334 0.6448277 1.801256 1.072566 1.187051 1.31304  
0.450297 0.529329172 0.3738851 0.150426704 0.6735829 0.383506494  
0.3059819 0.2493759 0.540128821 0.1279605 0.3846216 0.1519339  
0.60381603 0.0858262 0.23102 0.115240385 0.55569738 0.3957915  
0.3823972 0.4438664 0.496557473 1.5206995 1.171923848 0.2637729  
0.09870096 0.02986672 0.1394629 0.1572876 0.1423008 1.598207  
0.2149988 1.492202 0.2515461 0.2633094 0.349809947 0.7347201  
0.6074724 0.8702463 0.1801861 39.48669 22.42412 0.2993439 0.1796657  
1.844897 0.7805862 1.278289499 1.370636 0.5398776 0.3959281 0.2808905  
1.207735078 0.5460673 5.009076 1.161881 0.3540453 0.9074706 0.189935  
0.08492556 0.35482527 0.908455 0.2649902 0.187464045 0.7672879  
0.2151734 0.4341771 0.283851 1.213802 0.493175804 0.348852254 0.2117971  
1.261446 0.2590926 0.110718769 0.375674264 0.504542978 1.002782 0.4905504  
0.1941449 0.5963836 0.883967 0.09791203 0.4122631 1.985810274  
0.514017356 0.6021827 0.293332611 23.61322 0.579820808 0.6892696  
0.2357013 0.3065838 0.7916411 1.296497 0.6520333 1.3948 0.6287499

0.3900074 0.532221371 1.068721 0.117102 0.3805705 0.5921523 1.737004022  
0.3412334 0.08426082 0.3615534 0.919659462 0.5303698 0.388052  
0.2681686 0.09776874 0.4264945 0.1836816 0.4210447 2.095434027  
1.165303438 1.307652162 0.3163585 0.372198966 0.22402744 0.2130799  
0.06292792 1.217434422 0.6019667 0.1244034 0.1840606 0.532501161  
0.3588682 0.5396793 0.07014675 0.337331064 0.1846376 0.4785272  
0.4235826 0.204375 0.1295991 0.5956381 0.5871965 0.2337193  
1.566907 0.7643617 0.3784417 0.195353557 0.1888089 0.1140286  
0.2763383 0.7072595 0.2541934 0.6244619 0.134705 0.123250721  
0.275129273 0.189784021 0.1554698 0.181098 0.1137119 0.7192335  
0.5391157 0.45007861 0.1255336 2.808786 0.2205021 0.1967055  
0.2108966 0.320242797 0.301796 2.293553 0.9844793 0.3029102 0.4893324  
3.980326 2.484994 0.944327125 0.2239592 0.1490216 0.340319021 0.2642733  
0.3595216 0.4957774 1.08049 0.2867023 0.494039448 0.928198129  
0.845443993 0.07321833 0.622123 0.07462899 0.4165185 0.8601027  
0.6418844 0.278034726 0.2050217 0.559197309 0.05093245 0.1717326  
0.1847335 0.5474837 0.1379886 0.274702475 0.1486407 0.2602646  
0.1527459 1.24627 0.3575615 0.7572282 2.950328 0.476462731 1.144123  
0.440593565 0.1613472 0.03469989 1.311551797 1.82098 0.2209686  
1.062964 1.44662438 0.2744479 1.635075 0.4778753 0.377938941 0.1362436  
0.4492176 0.3976893 0.2952356 0.3789929 0.9423431 0.8351498  
AC005785.1 0.2481711 0.568017108 0.247851 0.393868598 1.188683387 0.320009037  
0.7560225 0.433347708 0.1169499 0.1384638 0.282044894 0.4282967  
0.2817877 0.6558611 0.708404 1.26299 0.9131975 0.365081174 0.1894848  
0.4149218 0.174273294 0.9480098 1.236818242 1.036807 0.8662717  
0.536898048 0.1907854 0.5323124 0.2220964 0.7783436 0.2850283  
0.205091034 0.7348162 1.605252869 0.2180136 0.685489238 1.118244481  
0.728274677 0.3252294 0.9469512 0.38412878 0.8257189 0.111513623  
0.5170456 0.504817149 0.559803 1.874703 5.056732 0.308316498 0.08850791  
0.7265795 1.887724 1.038558169 0.5821083 0.26466857 0.5312517  
0.2094803 1.006426 0.1030396 0.3119694 0.2832846 0.8199924  
1.323250666 0.1396301 0.1352431 0.6858525 0.1412192 0.3671016  
0.6447729 0.2150172 0.09315328 1.392663923 0.1585403 0.1301871  
0.337389485 0.1828056 0.111364247 0.7392328 0.2234047 2.773399  
0.176154 0.2631405 0.5500316 0.294969428 1.599887447 1.348814 0.2461249  
0.5145916 0.726262509 0.3334199 0.1218355 0.0849019 1.145870271  
0.527329 0.4212717 0.735678584 0.1723538 2.456884314 0.179912299  
0.1480355 0.11831566 0.1689579 1.437913 0.620220193 1.059513 0.2164431  
0.227246457 0.5423866 0.881744529 0.396360698 0.2518242 1.204422389  
0.2769729 2.447123 2.013784 0.6717935 0.3724648 0.394802817 0.9396518  
0.9663591 0.3552999 0.1632306 0.2261356 0.5293485 1.205536  
0.7573983 0.226217 0.7150269 1.566323 1.561804626 0.92902894 0.4198432  
2.544715623 0.61811594 0.1284513 0.820434604 0.8016105 0.07436939  
0.160609965 1.60439142 0.071138145 0.467031499 0.3073905 0.3401884

0.4199603 0.6330803 1.916312 0.9087613 0.586326288 0.1729943  
0.6481769 0.511757415 0.4376565 0.4548284 0.217637558 0.7915738  
0.1061639 1.004000128 0.7938847 0.7139427 0.281572334 0.5883673  
1.244446 0.1306688 0.390706087 0.4836463 0.7848563 0.201069414  
0.1340963 0.550759108 0.8701549 0.301465 0.29494742 0.4406844  
1.53539894 0.5778539 2.221478 0.3874797 0.2639058 0.4315112  
0.870388735 0.154669 0.2998585 2.007583 0.9298851 0.3851632 0.1437657  
0.4748211 1.063302 0.580915926 0.031059537 2.201145 0.1766462 2.012254  
0.4423482 0.596076731 0.7563566 0.90459833 0.466535 0.8324171  
0.18830524 0.721289587 0.2366218 0.1226657 0.456628545 0.7018455  
0.1954755 0.6505006 0.5044629 0.5374037 0.6733055 0.8751222  
0.03799469 0.2909695 0.8404893 2.194957 0.09873512 0.247344 0.334937821  
0.5594425 0.8253672 0.141452697 0.4534712 0.5796303 0.5904617  
0.4861442 0.2090086 1.636595223 1.530988 0.1590925 0.5471654  
0.03406874 0.372641 0.231566402 0.3510349 0.8656174 0.100084 0.618766423  
0.130398144 0.4503256 0.1721918 0.5000518 0.405148986 0.4244516  
1.355755 0.495952815 0.4095657 0.4577698 0.1020735 0.6738275  
0.1270443 1.03251 1.150984793 0.4528843 0.143390492 0.2322636  
1.338795 0.811024 0.1955542 1.302488 0.1871332 0.5880451 0.502456994  
0.7457918 1.188298 0.055339082 0.6038747 0.07169491 0.4898832  
0.2797044 0.7193888 0.04368088 0.1762133 1.621561 0.708875942  
0.1253176 0.116285315 0.460477 0.6968736 0.4227055 0.571809318  
1.776590229 2.802874 0.9192121 0.6096609 0.5599798 0.4875948  
0.14858531 0.1828743 1.932403 0.1902834 0.761134761 0.2602725  
0.09223284 0.281984919 0.03415145 0.115278258 0.3385777 0.6741439  
0.450809262 0.7267586 0.3962728 1.08963182 0.771198396 0.1434674  
0.3587582 0.6519422 0.6755978 0.7015446 1.586163 0.5974184  
1.704844 0.3927854 0.627320757 0.1052924 0.106137808 0.8444306  
0.086728793 0.5054379 0.1780913 1.061164588 1.007037 0.6899508  
0.358061 0.585219019 0.2329119 0.191563 0.2892799 0.307191433 0.2809143  
0.3015041 0.100379 1.489884683 0.913197718 2.030679154 0.3716743  
0.2163412 0.2971877 0.1064445 0.2231215 0.2059577 0.4356517  
0.09168587 1.099145 0.245749 0.2456297 0.135614442 0.3818022 1.640038  
0.6653356 0.1686146 3.160857 0.585132 0.2162745 0.4010657 0.4232996  
0.5012109 0.611114593 1.003308 0.308442 0.5819963 0.1289133 1.76632064  
1.073098 3.527161 0.5118618 0.2835132 1.297441 0.1030877 0.1152339  
0.498963225 0.1516113 0.07606082 0.197840565 0.2602796 0.5005111  
0.8981768 0.5266366 0.6334556 0.268984513 2.007661436 0.8283407  
0.7002134 1.028041 0.127119569 0.379810262 1.273124879 0.5017419  
0.1432344 0.518082 1.543167 1.307496 0.203711 0.1714266 1.100573958  
1.587835594 0.2646913 0.602404879 2.180991 0.559801435 0.6172696  
0.719592 0.1782847 1.244457 0.7913693 0.6034925 0.7306231 0.236983  
0.2756217 0.644089701 1.674373 0.1886861 0.5901589 1.071307 0.889853068  
0.2124413 0.09146554 0.3971403 0.738383815 0.2893433 0.4513204



|             |             |             |             |             |             |
|-------------|-------------|-------------|-------------|-------------|-------------|
| 0.2425819   | 0.2368939   | 0.4012337   | 0.1472747   | 1.237833    | 1.519849072 |
| 2.918451517 | 1.581204446 | 0.1898654   | 0.289924506 | 0.151989312 | 0.5004072   |
| 0.1097816   | 0.731860587 | 0.5445316   | 0.154734    | 0.2951571   | 0.620774508 |
| 0.1436877   | 0.1511055   | 0.1211392   | 0.283349352 | 0.1416046   | 0.2648479   |
| 0.07464302  | 0.3070247   | 0.2689479   | 0.7568952   | 0.2679997   | 0.2826588   |
| 2.547662    | 0.2798653   | 0.7475006   | 0.09719291  | 0.2769636   | 0.4998752   |
| 0.3416287   | 0.4045655   | 0.2393255   | 0.1158729   | 0.1687188   | 0.122211353 |
| 0.079429307 | 0.239120489 | 0.1518869   | 0.6084705   | 0.09551504  | 0.7657175   |
| 0.8002909   | 0.956768364 | 0.2081862   | 1.251575    | 0.1436137   | 0.1037968   |
| 0.4848849   | 0.099321471 | 0.2881676   | 2.950179    | 0.2848908   | 0.5993943   |
| 0.8399568   | 1.708203    | 1.277043    | 0.570680722 | 0.15994     | 0.7301831   |
| 0.182233    | 0.3048926   | 0.5869734   | 0.7098294   | 0.4214393   | 0.670352845 |
| 0.747801171 | 0.535344633 | 0.01806338  | 0.6924643   | 0.2025253   | 0.09768303  |
| 0.5393962   | 0.1161281   | 0.50930113  | 0.18546     | 0.391237854 | 0.2270734   |
| 0.4255162   | 0.5340177   | 0.577051    | 0.3009119   | 0.809375307 | 0.6360924   |
| 0.1448813   | 0.3244039   | 0.2670064   | 1.01526     | 1.535159    | 0.6491749   |
| 0.9826605   | 0.256214199 | 0.6020545   | 0.1883345   | 0.519971274 | 2.686563    |
| 0.3578593   | 0.1492051   | 0.396683107 | 0.1624989   | 0.9367431   | 0.4796531   |
| 0.7107481   | 0.3004079   | 0.235949    | 0.04970158  | 0.141879    | 0.2867924   |
| 0.1991683   |             |             |             |             | 0.8603246   |
| MIR29B2CHG  | 0.5304865   | 0.323369471 | 0.1858223   | 0.673541737 | 0.255888013 |
| 0.255377234 | 0.6838029   | 0.32797333  | 0.1795848   | 0.03140991  | 0.162122924 |
| 1.126159    | 0.8088631   | 1.103162    | 1.809078    | 0.4517284   | 0.3064669   |
| 0.3652905   | 0.4347365   | 0.197969784 | 0.3524703   | 0.459518098 | 0.7378363   |
| 0.6126019   | 0.671422838 | 0.3927154   | 0.3055973   | 0.2723707   | 0.5375724   |
| 0.3068119   | 0.101207608 | 0.7348254   | 0.569933001 | 0.7200302   | 1.162842222 |
| 0.418616827 | 0.904543378 | 0.3345348   | 0.4511047   | 0.484218819 | 0.8002165   |
| 0.097443448 | 0.3217537   | 0.218900913 | 1.736057    | 0.7457667   | 0.3481401   |
| 0.218428789 | 0.3081144   | 0.4077227   | 0.7673118   | 1.042647347 | 0.5842825   |
| 0.141288148 | 1.178856    | 0.1381727   | 0.7365621   | 0.1006884   | 0.5395856   |
| 0.1997511   | 1.119265    | 0.352357674 | 0.4106436   | 0.3004507   | 0.8250595   |
| 0.1421037   | 0.4281009   | 0.6492445   | 0.3426807   | 0.243824    | 1.096822075 |
| 0.08765356  | 0.02446469  | 0.414923194 | 0.2620406   | 0.039208305 | 0.8950175   |
| 1.047308    | 0.2001789   | 0.2456501   | 0.09803306  | 0.503888    | 0.387320595 |
| 0.2039818   | 0.08134851  | 0.2999953   | 0.506775816 | 0.5837459   | 0.1400651   |
| 0.1071625   | 0.38300599  | 1.765338    | 0.7346965   | 0.836323814 | 1.764472    |
| 0.2040616   | 0.1782387   | 0.055584538 | 0.1651025   | 0.1768922   | 0.159934484 |
| 1.19933     | 0.2574832   | 0.239244256 | 0.7353888   | 1.996446281 | 0.293227614 |
| 0.1028529   | 0.473244673 | 0.261631    | 0.5122669   | 0.5517907   | 0.139755    |
| 0.401395852 | 0.3505329   | 1.010705    | 0.2913936   | 0.1072867   | 0.1300904   |
| 0.4543123   | 0.3451849   | 1.89192     | 0.6907967   | 1.615769    | 0.5351864   |
| 0.816437378 | 0.4211112   | 0.299318775 | 0.485973865 | 0.5140792   | 2.104497353 |
| 0.4506442   | 0.03860719  | 0.221569468 | 0.444204658 | 0.122440944 | 0.336275877 |
| 0.3504389   | 0.8622292   | 0.9041125   | 0.6769959   | 0.6149937   | 0.4739831   |

0.381112087 0.344817 0.8942522 0.925742832 0.8538946 0.7044838  
0.248749505 0.8069455 0.1885301 0.158012101 0.4112914 0.2659081  
0.194594233 0.7747926 0.7173626 0.1764565 0.670164432 1.298623  
0.6654392 0.056979563 0.1414597 0.996171675 0.399733 0.08416742  
0.377159065 0.2209804 1.006621088 0.2761963 0.9427613 0.3411685  
0.3261472 0.2128993 0.274183212 0.162685 0.1752864 1.401587 1.53753  
0.2762101 0.02019474 1.819696 1.255505 0.439113902 0.04299696 0.5162203  
0.3145687 3.567867 0.1225599 0.518371076 0.5900858 0.584700386  
0.6558589 0.6151506 0.069003128 1.297529115 0.3190869 0.2016986  
0.447395559 0.4410684 0.1124203 0.03435984 4.839586 0.5377948  
0.9540151 0.593353 0.08199033 0.1213038 0.4900974 7.788629 0.2090446  
0.5813301 0.482175589 0.6034743 0.3904645 0.239425303 0.1118461  
0.7164168 0.3991663 0.4569784 0.08715382 1.138596537 0.3204199  
0.0980472 1.047081 0.07213122 0.3413791 0.066361647 0.1674925  
0.2907661 0.08463477 0.381882266 0.2484741 0.9991539 0.552988  
0.340763 0.790657068 0.7776866 0.3128042 0.473529534 0.3536827  
0.6539683 0.08623729 0.1058226 0.1438017 0.289409 1.113101695  
0.2079985 0.07443795 0.566058 1.628658 0.4838376 0.1608825 0.3007085  
0.2065091 0.1569582 0.059568826 1.042423 1.009205 0.044419827 1.626544  
0.1050884 0.9407877 0.9076349 0.3731536 0.9523898 0.1709965  
0.7358247 0.473607557 0.1931068 0.452633436 0.5293758 0.895626  
1.367687 0.772529855 0.177066509 11.94287 0.2833723 1.562746 0.3598446  
0.1925727 0.111688287 0.5977251 20.70108 0.3809777 0.224679489  
0.3057611 0.1430785 0.095581532 0.1699894 0.553382057 0.07303377  
0.9016787 0.291234213 0.4180868 0.8204032 0.38449946 0.75637117  
0.1129337 0.1506363 0.7512764 0.7508212 0.5242878 0.5013429  
0.7190011 0.2110568 0.1172791 0.219882607 0.05729086 0.089754119  
0.4368503 0.109115299 3.16628 0.1065918 0.425224139 0.2544978  
0.1415402 0.09807535 0.114373006 0.2192993 0.1074226 0.094544626  
0.557723945 0.2533108 0.1139099 0.5543289 0.654917462 0.448734289  
1.308457992 0.2017739 0.2818727 0.1138524 0.0599534 0.2227699  
0.2405661 0.1631891 0.1374449 2.390146 0.2493134 0.3764024  
0.440628614 0.5268168 0.1276694 1.08066 0.2574484 16.04726 2.476677  
1.102444 0.2382222 0.7515061 0.3199702 0.772807843 0.5350428  
0.2009358 0.5641588 0.1670494 0.450681782 0.1076699 1.482506  
0.7777826 0.1269784 1.097243 0.1227712 0.1481637 1.828415575  
0.2697327 0.185813 0.145857624 0.0755073 1.273672 0.4093488 0.5434227  
0.7297695 0.406290341 0.679868413 0.3964599 1.661715 0.8100418  
0.071990472 0.962042893 0.454791096 0.1662009 0.2017157 0.7990756  
0.1907929 0.5134399 0.3613418 0.2082915 0.718518661 0.302707615  
0.03795427 0.651729305 21.78462 0.125668466 1.364019 0.3627473 0.8420464  
1.120055 0.3748992 0.5539374 0.5171845 0.1056563 0.628891 0.438667397  
0.7413878 0.1200899 0.2202644 0.3192926 0.994398294 0.3932303  
0.2765144 0.4701165 0.259752524 0.3878624 0.2352116 0.2518619

|             |             |             |             |             |             |             |
|-------------|-------------|-------------|-------------|-------------|-------------|-------------|
| 0.3634365   | 0.8152583   | 0.1487573   | 0.2035364   | 0.396549946 | 0.449968631 |             |
| 0.479165136 | 0.1855329   | 0.182779858 | 0.113574958 | 0.8625214   | 0.2220029   |             |
| 0.341403959 | 0.6785631   | 0.3814442   | 0.2098455   | 2.26732613  | 0.1140822   |             |
| 0.2314247   | 0.1300011   | 0.075876773 | 0.09712747  | 0.5958763   | 0.06838102  |             |
| 0.2516286   | 0.1389865   | 0.7349228   | 0.1911047   | 0.5128389   | 1.442896    |             |
| 0.640464    | 0.6169072   | 0.120877381 | 0.5827295   | 0.02326041  | 1.580618    | 1.51468     |
| 0.1349879   | 0.06899882  | 0.09960825  | 0.11235156  | 0.197922906 | 0.137052951 |             |
| 0.245307    | 0.7332273   | 0.0933355   | 0.4511476   | 1.593079    | 1.638624648 | 0.9466691   |
| 1.327616    | 0.1461839   | 0.1720658   | 0.2708932   | 0.083406705 | 1.514483    | 0.5152672   |
| 0.4995554   | 0.4507928   | 0.9419543   | 1.069902    | 1.041287    | 0.401145839 | 0.2402965   |
| 1.041467    | 0.072674931 | 0.2699842   | 0.400723    | 0.67025     | 0.655547    | 0.5127983   |
| 0.618041041 | 2.273938947 | 0.291146041 | 0.06177917  | 0.549386    | 0.4048785   |             |
| 0.09204495  | 0.8481322   | 0.1108186   | 0.884763545 | 0.2004835   | 0.068062815 |             |
| 0.1531536   | 0.4566446   | 0.4592655   | 0.6035821   | 0.02123662  | 0.191222421 |             |
| 0.3752206   | 0.1459995   | 0.2652685   | 0.2945161   | 0.1262065   | 0.3499316   |             |
| 0.4211456   | 0.234274293 | 1.011679    | 0.385181078 | 0.05730354  | 0.05607376  |             |
| 0.3757123   | 0.8539277   | 0.2362793   | 0.1746568   | 0.233080014 | 0.069471    |             |
| 0.6588239   | 1.540661    | 0.704420142 | 0.2944938   | 0.09847044  | 0.06504569  |             |
| 0.1141754   | 0.5858635   | 0.7462115   | 0.2340516   |             |             |             |
| MCCC1-AS1   | 0.413294    | 0.836154596 | 0.1921474   | 0.273305334 | 0.558595808 | 0.603987427 |
| 0.2023472   | 0.551872721 | 0           | 0.07411887  | 0.103611648 | 0.6006467   | 0.2222895   |
| 0.7527631   | 1.337504    | 1.227993    | 0.5760614   | 0.227996772 | 0.0823201   | 0.1612319   |
| 0.217670761 | 0.6439749   | 2.36012675  | 0.9759362   | 0.9396232   | 0.35126467  |             |
| 0.3000748   | 0.09973029  | 0.08876887  | 0.6961192   | 0.8232637   | 0.163944143 |             |
| 0.6518952   | 1.443594462 | 0.2932497   | 1.104244401 | 1.045019895 | 1.242859906 |             |
| 0.5986368   | 1.505332    | 0.479784378 | 1.790249    | 0.149996756 | 1.413779    | 0.315263259 |
| 1.009963    | 2.056759    | 0.2296712   | 0.154037341 | 0.1105481   | 1.060262    | 4.358967    |
| 0.914202707 | 1.232849    | 0.220384155 | 1.603564    | 0.2930424   | 1.732399    | 0.04826195  |
| 0.9351742   | 0.1286647   | 0.7358234   | 1.917208592 | 0.214647    | 0.1900364   |             |
| 0.7528077   | 0.1175903   | 0.8997318   | 0.702086    | 0.1278861   | 0.1994576   |             |
| 1.324613169 | 0.208442    | 0.1000654   | 0.517180192 | 0.6581213   | 0.114549753 |             |
| 1.319023    | 0.2116831   | 1.67953     | 0.1466799   | 0.09860028  | 1.272971    | 0           |
| 1.92083766  |             |             |             |             |             |             |
| 0.1604472   | 0.1808323   | 1.22704     | 0.229385684 | 0.1586469   | 0.2685439   |             |
| 0.07069609  | 1.797339059 | 0.6739616   | 1.149793    | 0.7100413   | 0.4305466   |             |
| 0.552365403 | 0.171210658 | 0.1320709   | 0.136410996 | 0.07913691  | 0.6670787   | 0           |
| 1.171824    | 0.1880637   | 0.37844704  | 1.337967    | 2.1220483   | 0.653855847 | 0.03931667  |
| 1.157190138 | 0.1383778   | 1.490451    | 0.7477787   | 0.2622135   | 0.5996115   |             |
| 1.07325347  | 0.5075215   | 0.7392884   | 0.2354733   | 0.09708488  | 0.2551141   |             |
| 1.096145    | 0.8604217   | 0.5676032   | 1.34211     | 0.5650115   | 1.744869    | 1.950724601 |
| 0.669746854 | 0.1815204   | 0.412014777 | 0.47844666  | 0.09437544  | 1.053203877 |             |
| 0.6514008   | 0.06966662  | 0.141603526 | 1.246881279 | 0.193860955 | 0.798243105 |             |
| 0.6049912   | 0.3611667   | 1.292613    | 1.014521    | 1.445139    | 0.4994267   | 0.523095022 |
| 0.6875058   | 0.9756546   | 0.791384343 | 1.270572    | 0.3629462   | 0.155333473 |             |
| 1.071852    | 0.1836012   | 0.38585103  | 0.307731    | 1.315665    | 0.240629567 | 0.4630765   |

1.036225 0.1269395 1.4951476 1.229742 0.8303726 0.140638199 0.1674889  
0.502702676 1.204975 0.1075816 0.345370417 0.4635145 2.374348948  
0.9414141 2.52566 0.1209924 0.3877924 0.1268155 0.801045072  
0.2790445 0.1426778 2.622533 1.019805 0.1862231 0.03591324 0.8154587  
0.7083121 1.282901401 0.025862647 1.173024 0.2554715 0.6614066  
0.2156104 0.922546889 1.218973 1.553558946 0.4026006 1.178333 0.193691595  
0.280801508 0.1182181 0.4478501 0.169887917 0.4827756 0.366229  
0.5270193 0.4938496 1.213062 0.5466316 0.5743117 0.158187 0.1106081  
1.349727 2.369576 0.1233221 0.1065302 1.474164242 1.905695 0.09818093  
0.176677192 0.2614128 1.505283 1.474997 1.63681 0.3960847 1.022069762  
2.448593 0.3070968 0.2948088 0 0.6205811 0.022248537 0.1370154  
1.907952 0.6923456 1.016909731 0 1.710511 0.2867612 1.183404 0.588417474  
1.421762 1.111805 0.557509311 0.2141396 1.814727 0.06374592 1.368795  
0.1057872 0.5429999 0.950481041 0.4525291 0.089548768 0.5663891  
2.229574 0.7634089 0.2873541 0.5363184 0.1289561 0.3808414  
0.609120442 1.627192 1.466747 0.078993828 0.8122707 0.03256303 0.4759018  
0.4745972 1.132395 0.8183742 0.2200938 1.66334 0.939060554 0.04816126  
0.232388223 1.217954 0.9082527 0.211187 1.796323853 0.762354465 5.234273  
1.120778 0.5151177 0 0.4263109 0.399723619 0.1417739 5.751581  
0.2273343 0.633781494 0.1338587 0.06912037 0.246543285 0.06398374  
0.230375687 0.07198131 2.168199 1.076088583 1.151751 0.5536756 0.60487623  
0.878249984 0.07964157 0.09335333 0.8571458 1.051335 1.111792 1.797331  
1.419219 0.9208148 0.08176611 0.499646098 0.04782262 0.163160865  
0.6700513 0.108325963 0.7891273 0.1334637 0.305131598 0.2819228  
0.08838585 0.243941 0.345540014 0.3393968 0.1740116 0.117183654  
0.592972554 0.4953423 0.1226089 0.2375532 1.303811911 1.323446428  
2.20086098 0.240711 0.3088164 0.6074071 0.05908943 0.2907998  
0.2250895 0.2660228 0.4997125 1.625748 0.1023151 0.2789057  
0.338770193 0.3709054 0.4670018 0.3443855 0.2316632 2.724657  
0.06355142 0.3426053 0.3928933 0.8933367 0.637834 1.122491338  
2.200656 0.2568334 0.5591729 0.2940278 1.323701468 0.1595619  
1.336498 0.2557302 0.1377108 1.135403 0.171678 0.1060532 1.158960952  
0.1975987 0.1727299 0.052951445 0.3250944 0.8856266 1.59229  
0.2356225 0.7995268 0.180274939 0.937804805 0.781239 0.7218758  
1.995921 0.028868152 0.499358384 1.230122178 0.4248715 0.1473315  
0.2851603 0.4701087 1.322666 0.1548759 0.1577691 2.654474255  
1.371585014 0.05749645 0.994263347 3.313854 0.415742305 0.817708 0.9130509  
0.3711352 1.276204 1.335724 1.258729 0.9675362 0.05919929 0.2203244  
1.09701909 2.539466 0.5953835 0.3276089 0.2943784 1.291678081  
0.3673986 0.9424986 0.6711075 0.424237697 0.4262613 0.2442735  
0.1211958 0.1656956 0.6167984 0.2688485 0.3865195 1.317202529  
1.155539909 2.110639313 0.1237281 0.490616081 0.156336873 1.055587  
0.7922455 1.549631084 0.8109249 0.1756961 0.1890549 1.525297442  
0.07976387 0.1742158 0.1729203 0.163342568 0.0544206 0.3201293

0.2051073 0.2968876 0.1550405 0.9934469 0.3437838 0.6888709  
0.8241358 0.8019255 0.5358298 0.132431836 1.089689 0.8622031  
0.4579229 0.6110729 0.2285876 0.2351823 0.1580498 0.032135658  
0.158734018 0.16082025 0.04215772 0.7599915 0.1101232 0.8626318  
0.7965396 0.966188362 0.2600286 2.303726 0.08968815 0.1481648  
0.5361322 0.046520424 0.6061929 1.797479 1.13867 0.4491931 1.059114  
2.03371 1.203284 0.726240307 0.0799073 0.448991 0.044366376 0.1027928  
0.6702375 1.103831 1.160025 0.8705614 1.23872131 0.811121177 0.382089111  
0.06768454 1.350894 0.08431937 0.1742972 0.1959902 0.2719618  
0.753928413 0.4169578 0.11846394 0.09865011 0.2783933 0.5989375  
0.6461879 0.2004506 1.037528935 0.1937785 0.1583396 0.4276972  
0.1616951 0.583541 0.8454871 0.6847027 0.502441541 0.2887911  
0.344633217 0.05859568 0 0.933018878 4.433271 0.6765001 0.4037803  
0.615059974 0.05074107 0.6896904 1.974798 0.134846326 0.3271108  
0.09823498 0.1064199 0.2710266 0.7411227 0.8675366 0.6004676  
AC132872.1 1.362573 3.795613902 2.391793 3.796657075 3.463023384 3.809669652  
2.705864 2.228450324 1.255719 1.77141 2.348039364 4.614173 5.336343 4.861464  
4.979287 5.551225 1.740621 1.433023455 1.067147 1.695682 1.686083183 2.659688  
5.082037859 6.271655 2.478976 2.269124343 2.802373 1.298163 9.205964 3.810929  
1.210737 1.666108073 2.833397 4.945871404 2.641613 4.661450122 4.798699741  
3.689916986 2.217246 4.542988 2.23599595 3.438177 1.152276334 2.849247  
3.848058486 5.222095 5.043859 12.29154 4.166258908 1.132309 3.819378 10.78135  
4.175786017 5.160347 2.304351483 5.805314 0.7235854 5.55865 1.22553  
3.412408 2.038582 9.841128 4.422635922 1.855035 0.8110341 3.589495 0.8065445  
2.902048 4.045073 0.3929688 1.340706 8.442467622 1.334378 1.697552 3.274031927  
2.269903 2.137075242 2.013559 3.621882 3.091143 1.643244 1.809459 3.000955  
1.031853045 5.255794501 1.027131 1.180782 4.089643 2.629864552 2.80561  
1.272156 1.27852 4.275678274 3.382946 2.757107 1.898394941 0.5340173  
5.736280042 1.60295083 1.268212 1.266225085 0.5234956 6.602727 1.515300869  
3.841353 1.008285 1.297872022 2.883987 7.41137816 2.403828912 1.409478  
4.579462229 3.484342 9.707319 8.681941 2.803271 3.639973 2.469708793 5.624809  
5.872391 2.724957 3.853336 1.411515 1.514816 4.644363 0.4844814 1.876619  
4.935481 6.498956 4.928261427 3.250523846 2.556476 5.331687938 4.051327623  
1.788316 4.318695667 2.285808 1.129823 1.510832604 5.245397755 0.775646604  
3.354316695 2.159918 3.168898 3.993532 3.973187 5.767612 1.990963 4.464911482  
1.697601 3.189356 2.961769275 4.955936 4.889374 0.89495478 5.098914 2.429066  
2.392901979 3.480321 2.171122 1.338990852 2.487572 4.905355 1.218938 3.097426592  
3.659978 2.436397 3.099672621 1.783766 1.930883082 2.404909 1.549581 2.432043561  
2.73236 6.246953677 10.78766 8.824332 1.303833 2.544583 1.123034 2.139120718  
1.676422 1.438568 11.85511 4.261633 1.311354 0.471305 5.489225 4.789442 3.608209688  
1.539747286 7.790913 1.011003 9.382786 1.121467 3.84397923 2.145954 5.314247091  
3.865977 3.571975 1.479083663 3.37049927 3.511524 1.252422 2.687844153  
1.724214 0.8466173 6.171252 4.044494 1.428876 4.091556 3.617257 2.12659  
0.4855385 4.512267 12.04721 1.381569 2.414179 2.193492377 3.996833 4.357754

1.017926751 2.844915 1.789605 7.309756 2.822387 2.789166 4.992560709 8.404834  
1.457104 3.740225 0.1271234 2.324063 2.535216095 1.43849 4.967063 2.080658  
4.270510288 1.543106534 4.03478 1.904592 3.423125 2.350518539 2.853909  
5.321634 2.828757147 4.371494 3.53293 1.101818 3.990525 1.611772 3.684674  
3.802918392 2.433432 0.993654111 2.19319 5.761421 5.676548 2.897287 6.180004  
1.960646 2.263878 13.718763977 6.778438 12.1171 1.719355192 5.051324 1.104827  
3.090091 2.160509 2.663301 0.1746322 3.068421 5.048481 3.229066081 2.68232  
2.566236889 7.082222 3.827772 2.027925 2.53542731 4.061143799 2.349919  
2.274954 3.32629 10.82386 1.975351 1.151505071 2.20847 3.484726 0.7276601  
5.152723102 3.268537 0.8702226 2.063050039 1.160542 2.009401321 1.486083  
4.190982 2.563262481 8.310395 3.931118 4.0658312 3.373361863 0.7392671  
2.940278 5.87127 1.85969 1.857744 5.766037 3.446823 8.191254 1.814592 4.768778962  
1.010278 1.344797112 1.302722 1.373065573 4.9074 2.321096 3.308491483  
3.665088 1.527707 1.058439 2.041877908 1.132912 1.601325 1.487840163 3.081472433  
1.136282 1.199779 1.807989 3.702845665 3.355465664 6.666594101 3.34607 2.04284  
0.6048656 0.9835053 4.45234 1.955574 1.176612 1.319586 3.46917 0.6440716  
2.094944 3.057861666 2.555323 2.867292 5.319901 3.100886 3.203699 0.5695696  
1.847389 2.565478 2.322553 2.525538 3.08990398 5.850384 2.199069 3.651235  
1.738859 7.328358407 1.470907 10.71062 5.129584 1.76316 5.907292 1.153978  
1.435427 3.569658287 0.8538497 3.449973 1.514101159 2.133177 5.702842  
3.814772 1.596367 4.16929 2.685815442 3.067015804 3.325147 3.643649 3.262455  
1.349072744 4.443453872 3.39962636 2.271107 2.209709 2.71017 5.010789 4.441  
1.331396 1.68812 4.187579903 7.000620786 2.834166 5.728454511 4.063061  
2.104962278 3.484815 3.580096 2.399646 5.446562 3.899197 1.948905 4.138619  
1.875924 1.357553 2.933952312 7.004783 1.413413 1.625365 1.593271 4.249830782  
1.986104 1.097012 5.304887 4.132786735 3.357593 1.238978 2.6961 2.621517  
2.048306 1.847897 5.97656 3.802802279 5.487517939 4.207905777 0.8052683  
2.662171418 1.958743087 2.311784 0.9558198 4.101848929 3.508298 1.867084  
1.742786 4.589294521 1.238259 1.74726 1.840353 1.760204113 3.692859 2.145  
1.539826 4.640577 2.663259 4.205623 1.945963 1.091457 6.111191 3.554076 5.145311  
1.992295682 1.306584 3.882713 5.43655 3.430426 1.226957 2.547871 2.158471  
1.625203767 0.939951128 2.54438207 1.025544 2.60102 3.219376 6.962884  
4.849226 4.720301432 3.132509 9.360274 2.172217 1.351616 3.660953 1.588312392  
4.535509 5.048641 2.085576 4.094289 2.238713 5.858616 6.520708 1.894099545  
2.698376 7.059984 1.888726751 1.729721 2.34035 5.537076 6.269753 2.838367  
2.878256209 4.059616755 1.589906363 0.5921689 3.490832 1.954022 1.316636  
3.936513 2.251707 2.971254744 3.158586 0.853163415 0.6946784 4.585071  
1.411684 4.306394 2.085232 2.40131013 6.376205 3.446372 3.184701 3.868759  
3.304604 4.832618 2.560737 3.825297979 4.014421 1.439302026 1.637982 0.3011776  
2.131499194 10.39568 1.422955 1.709991 2.745251997 1.48338 4.367867 4.985784  
1.942294885 0.9115306 1.855161 0.9083536 0.7207022 1.9294 2.877819  
2.976352  
AC092171.4 0.4002151 0.552064096 0.05168522 0.893215456 1.103189506  
0.537567924 0.5170739 0.179848979 0.0505179 0.02990556 0.125415998

0.8179297 0.3587584 1.071973 1.170642 0.8003778 0.08367474 0.4515989  
0.1494657 0.3066832 0.131739029 0.5783349 1.246603197 1.181315  
0.7927057 0.57979892 0.2563931 0.2011964 2.095268 0.5811122  
0.2154624 0.124028154 0.6852554 2.362210875 0.2281899 0.561769905  
1.313588482 0.545076493 0.2329122 0.9891499 0.441371262 1.366149  
0.051875008 1.33101 0.22896493 1.661349 1.608658 4.614864 0.163146748  
0.0669061 0.6960739 5.707976 0.568249074 0.7270146 0.177841644  
1.405568 0.2280286 1.994679 0.1168367 0.6791851 0.233612 1.612839  
3.240938193 0.129909 0.2044696 1.131183 0.2236715 0.4817058 0.7498545  
0.1857586 0.04023868 0.528583117 0.176615 0.03028085 0.463716417  
0.2438628 0.079231972 1.326408 0.279524 2.795341 0.0443869 0.11935  
0.6114519 0.083616482 1.350037494 0.5178992 0.1094436 4.950872  
0.302899968 0.1680289 0.1516933 0.1283604 0.349166607 0.3708146  
0.849209 0.707794334 0.8468721 1.262924062 0.051810187 0.0639457  
0.055039247 0.127721 0.8074608 0.312563499 0.9537691 0.1707303  
0.163603066 0.6560131 2.0809062 0.271356088 0.1427718 1.884595332  
0.2791642 1.77796 2.509716 0.2221762 0.3754115 1.123556489 5.413747  
0.9313917 0.285027 0.2585346 0.06617167 0.3159097 1.112502 1.374103  
0.4916393 1.544322 3.840117 1.560105669 0.58445123 0.415027 2.351110545  
0.947671247 0.1142361 0.585738814 0.4672495 0.1405458 0.057134334  
1.401473138 0.097774018 0.569826656 0.7886387 0.2057279 2.086179 1.44473  
1.503269 0.1923497 1.139718109 0.1426606 1.356864 1.178985438 2.360583  
0.3629212 0.164519531 0.9842466 0.07407958 0.145953341 0.7449816  
4.742223 0.336078904 0.63364 2.706629 0.1756035 0.728943598 0.4178337  
1.088879 0.072957655 0.1105831 0.25620756 1.744545 0.1627768 0.25083073  
0.2337741 1.958119534 2.620915 3.164815 0.3661362 0.3520504 0.2814221  
1.662204737 0.2078569 0.1942913 2.116285 0.925812 0.2254125 0.02173547  
1.465644 0.7769929 0.534597712 0.093915782 0.7986815 0.1124486  
2.433809 0.5219681 0.705278185 1.032848 0.987734543 0.6155686 0.8390026  
0.133972939 0.283245192 0.4292889 0.08559426 0.235016738 0.2152951  
0.2955329 0.8239888 0.8657458 0.2936686 0.2035897 0.5381974  
0.07659056 0.1147584 0.6353541 2.668127 0.4727022 0.1547385  
0.868082518 0.3954402 0.03961414 0.244408774 0.3691629 0.2082354  
1.292875 1.022588 0.4140601 1.72126223 2.117058 0.1530625 3.308965  
0.1030148 0.6385014 0.21544469 0.4312084 2.04003 0.1862322  
1.009347269 0 0.9326471 0.1084713 0.5040079 0.170939 0.7583898  
0.9316913 0.524870317 0.8928129 0.5416333 0 0.134339 0.1280494  
0.2957717 0.949165106 0.2464923 0.036131228 0.2675441 4.508925  
0.3554088 0.1391303 0.8222983 0.2536528 0.2963487 0.424509284  
1.113265 1.648598 0.047808764 0.3043261 0.05912355 0.4663279 0.3829819  
1.102519 0 0.2960122 3.150345 1.558874481 0.08744468 0.070323177  
1.023794 0.8932529 0.3976464 1.074075371 0.889829988 1.64566 0.6617745  
1.165713 0.736187 0.1474357 0.138240764 0.2669478 1.243207 0.1250797  
0.383578199 0.09258763 0.08366627 0.596853205 0.02581622 0.383427888

0.06534696 0.7134511 1.181377056 1.205094 0.1421621 1.83042054 0.65156  
0.1446024 0.2259978 0.8040828 0.3348899 1.094857 1.953065 1.647043  
2.554278 0.6928125 0.962170906 0.05788656 0.07406135 1.051373 0.576938593  
0.9824849 0.2692503 0.669436758 1.653757 0.1604791 0.1312341  
0.193041464 0.05868864 0.1316445 0.260047587 0.506653764 0.3497571  
0.4240318 0.3354688 1.233857676 0.590194505 1.689376539 0.1664954  
0.09345116 0.08169241 0.1072866 0.1173322 0.2529967 0.263459  
0.2016245 0.5684974 0.1032055 0.2700796 0.451068224 0.2351695  
0.5138901 0.1631188 0.02549228 1.211526 0.3846269 0.2552026  
0.2140087 0.7723808 0.3717334 1.63045419 0.7399357 0.5051836  
0.5414776 0.1525303 0.534088409 0.9657031 2.636341 1.733462 0.07143905  
0.8995685 0.1298791 0.05501632 0.582317674 0.07972734 0.1881718  
0.128189417 0.2623388 0.8197651 0.9636879 0.1901384 0.4032424  
0.09918752 0.468870144 1.661269 1.545935 1.063018 0.034943253 1.299556491  
0.980556251 0.3599979 0.6623924 0.1593094 0.7966558 0.8821903  
0.05356243 0.1909705 1.893427966 2.512773777 0.2435866 0.683067083  
2.651492 0.320238787 1.102908 1.899556 0.2470809 1.148677 0.4203727  
0.2303147 1.437317 0.03582868 0.1000088 0.737710622 0.9492863  
0.120113 0.1982759 0.2591478 2.654318605 0.1976511 0.2765675  
0.6180828 0.64747615 0.3589322 0.2729346 0.03667516 0.1432608  
0.2099811 0.2055321 1.547537 4.157941527 2.848292849 1.277404331  
0.1996878 0.169675091 0.05406768 0.4707417 0.3319505 0.90625648  
0.9340827 0.06380105 0.2517242 1.477028535 0.4344733 0.1054391  
0.05232754 0.197716874 0.1317461 0.6716636 0.09028026 0.4192598  
0.09383387 1.396464 0.1971146 0.0833839 2.355372 0.8462384 0.2555057  
0.106867463 0.9212107 0.3958664 0.3527298 0.3129369 0.1064201 0  
0.0850268 0.077796767 0.048034622 0.250281967 0.07654428 0.3891997  
0.08886526 1.952138 0.5482511 1.169515976 0.1716817 2.077169 0.01809373  
0.04483626 0.4086028 0.037540216 0.4815313 2.066959 0.4402886  
0.8544213 1.427129 2.417731 4.301777 0.097674725 0.3143505 0.4755433  
0.161108913 0.08887487 0.8112844 0.658091 1.343967 0.5146294 0.666400705  
0.981815982 0.231248552 0.191166 0.7777076 0.1428893 0.08439072  
0.8896313 0.153624 0.427775343 0.4766646 0.322636165 0.08955776  
0.4288826 0.8567943 0.982731 0.1010975 0.644035731 0.6098504  
0.08214048 0.05449507 0.3669801 0.1358352 1.169616 0.7415522  
1.129471321 0.1498137 0.119188251 0.2127802 0.03559209 0.354310966  
1.808506 0.8481101 0.2631747 1.034020921 0.3070959 1.908185 0.6983136  
0.353651559 0.1397467 0.1189078 0.2790995 0.05047111 0.269126  
1.264898 0.2284329  
AC002401.4 0 0.166239998 2.017053 0.107587606 5.169419182 0.069929934  
2.065121 0.557042659 0 1.685791 2.039354479 0.07388959 0.07292087  
0.813449 0.1350034 0.7189083 0.06047162 1.387072207 0.1080187  
0.1208943 0.057124574 0.3271006 0.619381463 0.09850788 0.9714177  
0.293313942 0.09264746 1.65761 0 0.7874419 0.08758936 0.268904951



0.3601696 0.420945212 0.2198834 0.20999502 1.766806133 0.236355639  
0.2805423 0.3103986 0.604380184 0 0.168705001 0.09161134 0.082736327  
0.0339808 10.38013 1.024656 0.025265559 0.1813236 0.2122249 9.74956  
1.10233241 0.08295987 0.771155535 0.07255731 0.13733 0.4158322  
0.02110943 0.04090385 0.2110389 0.1826681 0.563868204 0.2464483  
0.8034988 0.1362508 0.06612835 0.8173444 0.05419189 8.457591  
0.4798273 0.171902846 0.1641079 0.4923885 1.859956208 0.2819829  
0.128836894 0.4526692 0.0505029 0.04591339 0.3849403 0.6469058  
0.02651373 0.271932847 0.813058601 1.543926 2.111829 4.395815 0.793532107  
0.1301081 0.7987223 0.06957441 0.174698479 0.1205943 1.099586  
3.754206361 3.566271 10.46936141 0.786306238 0.06932021 0.208828155  
0.1730696 0 0.621195382 1.511131 0.1850799 0.319236446 0.3333514  
0.140987641 0.24513586 0.2579524 1.10431992 0.2723646 1.133761  
0.3568069 1.238655 0.1085238 1.179927033 0 0.1781776 0.5941979  
0.5095707 0.1434665 0.6849226 0.2309373 0.04137759 0.3012386  
0.11958 0.4856683 0.411380142 0.408756905 0.105861 11.160290005 2.45415607  
0.02476748 0.112053354 0.1582878 0.8836786 0.030968181 0.93493181  
1.038718969 0.456575255 0.1831976 0.4181604 0.04916345 1.957695  
0.1777762 0.1489402 0.137278796 0.2062012 0.190673 0.199699506  
0.2714075 0.1449457 2.802596861 0.2667427 0.4282977 2.43659465  
0.08973287 0.3836416 1.651609719 0.5019626 0.0357819 0.07138598  
1.035447416 0 1.452796 2.240872056 0.05993871 0.451329612 1.860168  
0.4587905 0.060425013 0.4561603 0.136948104 0.08235355 1.750414  
0.7938184 0 0.859757 2.072196231 0.7886439 0.5850585 0.03018624  
0.03717128 0.04072632 0.1178115 0.03242507 0.232358 0.11038659  
0.067872812 15.87317 0.09142479 1.909344 0.1060947 0.254851808 0.319902  
0.329462056 0.3892618 0.3638077 1.688334784 0.153525696 0.6515178  
0.6185886 2.547694316 3.267463 0.2135813 0.8068005 1.340729 0.9126057  
0.220701 0.4861931 0.04151392 4.831008 2.230252 0.2892378 0.2966711  
0.8107624 0.052280175 0.1667074 0.3006054 4.040500452 1.772271 0.13168  
0.03336998 0.3117755 0.02362426 0.466482731 0.03059991 0.4503735  
0.1758371 0.03722434 0.2442939 0.233552391 0.5393661 1.00143  
2.422616 0.080062018 0.512914276 0.3437516 0.04703524 0.4601 0.40149652  
0.5375472 0.4039992 0.948307719 0.09366311 0.09785942 0.13941  
0.8980513 0.1110494 0.4631333 0.405340221 0.2375195 0.744191733  
0.1812692 0.2854243 0.1926401 0.09426496 1.688989 0.1057584  
0.07139027 0.096881779 0.06188888 0.0458246 0.492356468 0.1522634  
0.7477489 6.066262 0.1729878 0.1938136 0.1789755 0.1283566  
0.282454 0.140824567 0.09479424 0.406579738 0.08878736 0.02482895  
0.1231622 0.198791342 0.500172526 0.3567948 0.2869581 1.028584  
1.755737 0.3196548 0.374649067 0.1033515 4.177859 1.24745 0.914797817  
0.3262007 0.6348878 0.415939847 0.05597206 0.566801244 1.038976  
0.08286593 0.065675357 0.2049224 0.6824896 1.19055827 0.260224017  
0.5225198 0.3674887 0.08435462 0.1815184 0.4450789 1.983215

0.09599321 0.9565496 0.393403 0.566221428 0.2823832 0.133810101 0  
0.085285792 2.189292 0.6129486 0.375362895 0 1.043802 0.5690562  
3.487770298 1.399669 0.7420864 0.205021145 0.274618507 0.1083296  
0.3677367 0.2770775 0.808757802 1.233898436 11.833437355 1.39879 0  
0.177117 1.066118 0.8585577 0.3586485 0.1586679 0.6830333 0.1896242  
0.8279101 0.07319482 0.266716156 1.390555 1.531974 0.07859047 0.02763486  
0.583712 0.0833908 0.6224667 0.1804411 0.2153052 0.4029769  
0.176749065 0 1.895688 0.1956626 1.671874 3.409534085 3.936226 11.07444  
0.06711272 0.1807012 0.4063231 0.1126361 0.1988011 0 0.4537484  
0.09066099 0.208445226 0.3554849 0.1367177 0.09497127 3.349436  
0.1529969 0 1.3643245 0.1385304 0.5100468 1.274582 0.189400823  
0.16381182 0.314954095 1.505269 0.2209431 0.5468802 0.3084333  
0.9209168 0.5516103 0.6802124 0.093298493 1.897048764 0.1508912  
0.176304172 1.179218 0.743901911 0.2145958 1.834569 0.09739913 0.2576319  
0.9464625 0.0384111 0 1.24288 0.614348 6.109813012 0.2450171  
0.1627603 0.2955434 0.2458126 0.157666238 0.1249869 0 0.1722938  
0.580878822 0.4134185 0.2219056 1.550548 0.2795429 0.151753 0.3899117  
0.3121124 0.440573745 0.385960781 0.158259159 0.1623534 0.183935948  
0.234447846 0.4738561 0.7596839 0.753954492 0.4290638 0.691634  
0.3473032 6.371321776 0.1308305 0.4572044 0.4821673 0.60728133  
19.28058 0.9801556 0.4893407 3.798303 0.4068817 3.53228 0.09496962  
3.706078 0.240314 0.2158501 0.04261238 0.579247312 0 0.1950628  
0.2731257 0.03083987 0.1153645 0.04747709 0.3456492 0.042167716  
0.026035919 0.030146408 0.6085029 1.073956 0.09633421 0.3937137  
0.06148247 0.266907681 0 0.03084591 0.1373013 0.4374419 3.256949  
0.203476984 0.174001 0.6781012 0.1245115 0.4771507 0.02622164  
2.001443 0.1101575 0.211768185 0.05242631 0.3682227 1.659173095  
0.05780677 0.2398558 0.1945642 1.022022 0.2125269 0 0.032252596  
0.543149829 0 2.615686 0.3097978 0.3659344 1.350164 9.944565 0.772881694  
0.3039572 0.971536383 0.3883396 0.3653016 0.1428933 0.173931  
0.4602972 0.174541416 0.254272 0.148407 0.5021398 0.1856512 1.207466  
0.31698 0.02364348 0.282554113 1.299242 0.258411577 0 2.469346 1.080253418  
0.2892551 0.3804381 0.4890755 0.112092834 0 0.1292853 0.1746936  
1.386049072 0.2524869 0.06445091 0.06982092 0.05471311 0.194497  
1.138363 0.9229927  
AC005519.1 0.1965943 0.708982583 0.3345361 0.948271545 0.575844252  
0.576593704 0.1887291 0.3919877 0.04671151 0.02765225 0.115966219  
0.5882339 0.4872238 1.239003 1.450926 1.533005 0.5544854 0.220385255  
0.2533737 0.3609141 0.316713346 0.7672627 0.672393629 1.869524  
0.8923203 0.482501281 0.5432957 0.1488294 0.2608032 0.4029951  
0.8840738 0.25230248 0.6432235 0.972428603 0.3516606 1.629973049  
1.079655915 0.987852456 0.7178762 1.564481 0.655132056 1.742363 0.107924304  
0.9376927 1.058565002 1.985428 1.629112 0.257057 0.183179921 0.1546622  
1.397876 1.153153 1.037038698 0.5307125 0.150738248 2.599325 0.1288511

1.714332 0.09903055 0.575676 0.2700124 1.268731 1.368882002 0.2552564  
0.2126962 1.496291 0.11281 1.074795 1.710275 0.04294053 0.4836883  
1.97131471 0.03499447 0 0.418057141 0.1803907 0.13736633 0.4996717  
0.2261547 0.1370684 0.2462548 0.2023217 0.8367632 0.193290478  
1.265653292 0.1047543 0.09107755 0.9809649 0.443455599 0.3218344  
0.1603013 0.108798 1.018243781 0.5743151 0.5452939 0.303858201 0.13553  
0.618229017 0.179649076 0.133037 0.101784357 0.1328597 0.315878 0  
0.9723568 0.1183997 0.408445168 1.393248 1.92411517 0.397274312  
0.1320143 1.295172576 0.5807922 1.595642 0.5135788 0.3375016  
0.4744044 1.103830552 0.9230617 2.161477 0.07095601 0.0543306  
0.418103 1.148953 0.7441501 0.7941047 0.9388386 1.223967 1.686618  
1.481543635 0.845486897 0.3047472 1.054041357 1.070992523 0.2218203  
2.309785485 0.6345638 0.1039648 0.343391141 0.897144697 0.153691888  
0.664341653 0.3125215 0.4042319 0.9330445 0.4341587 1.668001  
0.9782114 1.073358841 0.4397049 1.66122 0.579143176 1.355931 0.7506305  
0.228185099 1.447864 0.3424894 0.499337664 0.6123103 0.7035487  
0.269322046 0.7436383 0.7324951 0.2232618 1.220207784 1.521257  
1.432803 0.112434133 0.1448555 0.755128207 0.6743279 0.150512 0.373667042  
0.3242398 3.168515295 0.5092727 2.408768 0.1467045 0.3038227  
0.1182808 0.345816406 0.5405495 0.08982595 2.909494 2.10843 0.4689635  
0.02009776 1.355211 1.474058 1.23579281 0.057892977 1.559062 0.4938856  
1.228852 0.4675567 1.458251358 0.6651072 1.888095347 1.268813 0.5042608  
0.193560025 1.021423188 0.304323 0.1582899 0.706253666 0.3128292  
0.5579166 0.9953898 0.6289753 0.5340314 1.482466 0.5702188  
0.08852457 0.04421319 1.538643 2.01993 0.03450673 0.1788492 0.791526432  
2.884531 0.4578664 0.22599319 0.1584827 0.5375226 1.067375 0.4136733  
0.4533888 0.746048187 2.179398 0.2527314 0.8848968 0 0.3993828  
0.049802869 0.01533531 0.4092956 0.1506751 1.559286384 0.218748371  
1.690254 0.2206562 0.9443284 0.790295891 0.9305009 0.6891926  
0.404435553 0.8255417 1.085116 0 1.852902 0.1302413 0.3950354  
1.356364953 0.4558394 0.066817661 0.3015009 3.256228 1.117341 0.1286472  
0.4802149 0.4961439 0.5023692 0.795376729 1.451695 1.680727 0.022103247  
0.9091252 0.0820031 0.6594689 0.7967816 0.3306315 0.06106377  
0.5200461 1.686459 1.666638665 0.1482359 0.238423176 1.306382 1.429526  
0.4858691 1.622946723 0.868493741 2.853119 0.5660181 1.378682 0.3063227  
0.3521776 0.20771509 0.2292029 4.914261 0.1272208 0.656151616  
0.1284171 0.02578741 0.236520781 0.04774207 0.306191533 0.1007054  
2.085106 1.750582174 0.6226934 0.7229781 1.18475208 1.71227349  
0.133707 0.2194179 1.71484 1.021867 1.170543 1.051541 1.621197 0.6119259  
0.09151584 1.652251262 0.02676248 0.148375531 0.3610859 0.24248533  
1.829532 0.1120333 0.298825842 0.509717 0.04946246 0.1061777 0.104122828  
0.1627998 0.03651761 0.109297117 1.561595606 0.2656531 0.2254472  
0.3323486 0.530646332 1.237625974 1.441925797 0.1731942 0.1008115  
0.03776854 0.06613521 0.1491758 0.2069417 0.121804 0.04660816 1.19285

0.08588632 0.1456757 0.644580302 0.6622343 0.3563773 0.7625202  
0.6953594 4.978845 0.2489523 0.3613348 0.3188126 1.714041 0.5684671  
1.997574746 2.360433 0.1257629 1.095234 0.1175312 0.850512892 0.1071528  
2.271493 1.039944 0.1100938 2.137234 0.0960744 0.3560968 0.77095034  
0.1105801 0.1933261 0.207428668 0.2274115 2.94453 1.417622 0.2417414  
0.9228262 0.513598349 0.547631952 0.9571062 1.942192 1.325455 0.064620734  
1.271500874 0.386175883 0.4160912 0.7184895 0.6137743 0.3420067  
0.7401899 0.08667161 0.1639684 2.01603006 0.352665397 0.09652842  
1.082742346 3.866156 0.317260288 1.006732 0.7025717 0.3011571 2.435567  
1.113771 0.384968 1.304408 0.04969362 0.5394282 1.091401582 2.779573  
0.444251 0.2062534 0.3744089 1.361644618 0.4035919 0.7192373  
1.273655 0.557401459 0.7260041 0.2208234 0.2204266 0.07947988  
1.725862 0.1821272 0.1164713 0.809400237 2.151623457 2.109205605  
0.05770058 0.549116755 0.124984541 1.367999 0.4604083 0.993874173  
0.6367972 0.1671491 0.07405918 0.839359913 0.1785497 0.2112382  
0.08467338 0.182819406 0.1370468 0.5255085 0.1043473 0.5261231  
0.1879881 1.093971 0.2936451 0.1252893 1.780754 1.438376 1.117663  
0.074111452 0.7550043 1.447517 0.4193389 0.5524105 0.2558442  
0.1923569 0.1572405 0.116894338 0.088830669 0.192853211 0.07077686  
1.243203 0.1437966 0.3987899 1.468383 1.2948293 0.4100937 2.052212  
0.1422085 0.08291591 0.2222445 0.104134966 1.53717 1.634595 0.8850303  
0.6463987 1.017657 1.087296 1.190163 1.249360001 0.2235885 0.7223845  
0.248282939 0.1314854 0.8694992 1.465945 0.9366638 0.5891518  
1.168191823 1.719391336 0.249461983 0.03787759 2.184986 0.2076218  
0.1755722 0.5758199 0.1826342 0.896565381 0.622234 0 0.02760327  
0.8639504 0.7770017 1.038497 0.1215241 1.444109966 0.1301307  
0.1898785 0.806224 0.4524388 0.05024015 1.199776 1.068851 1.365712664  
0.6464527 0.284703269 0.06558258 0 1.894021497 5.030425 0.5408325  
0.2781088 0.745765843 0.1798394 1.791977 2.272358 0.176079511 0.4953324  
0.1511791 0.01985155 0.1050035 0.4147468 1.004083 0.3936392  
AC098484.1 0.7838924 3.524287966 2.125928 2.116704641 1.208185148 1.740831532  
1.279302 2.314892052 4.089863 1.562009 1.604910176 0.9493692 2.488701  
2.099649 1.918889 1.045121 1.238294 1.277664105 3.025136 1.055764 2.442724671  
1.116355 1.017372444 1.51288 1.080108 1.211348488 3.654837 1.628859 2.700894  
0.493225 1.758423 2.267357655 1.301522 0.718317493 2.185091 3.971292184  
1.334094454 1.451975663 2.365481 1.563537 1.638007659 2.675845 2.269210072  
0.8828002 1.295575664 2.906131 0.800214 0.435616 2.617282189 2.708315  
2.187096 0.6576521 1.444969155 1.349041 1.896487619 1.747972 1.290278  
0.9349924 2.441017 1.576657 1.27103 1.383059 0.470218764 1.484291 1.635334  
1.928413 2.787911 1.859665 3.296468 1.536218 3.205127 2.576806293 2.306213  
2.174716 1.301855098 1.528475 0.491434668 2.726303 2.828737 0.6083524  
1.680833 1.03897 1.181669 1.81975264 1.469049063 0.5071988 0.685967  
2.555125 1.68096966 2.288129 1.188473 2.737648 2.419970979 2.057868 2.433385  
0.462113656 3.998012 0.582037925 1.961936181 2.170983 1.042106734 1.000657

0.8921595 0.816281535 3.129511 1.932122 1.36723488 2.46276 2.632303349  
1.47638643 3.573228 0.931142478 1.348755 0.4779833 0.8058565 1.243347  
1.503301 3.301027536 1.102994 1.43082 1.803661 1.872093 1.555308 2.750068  
0.9890648 2.591742 1.786366 1.728474 0.8357279 1.761870508 1.772518581  
1.785201 0.511674196 1.581192521 1.640846 3.059396118 2.097313 2.973066  
0.932564546 0.703854913 1.65973416 1.520493262 0.9930143 1.578239  
1.835808 0.7074399 1.106388 1.973458 1.322868402 2.173314 2.231121 1.443282793  
1.260987 2.818441 1.626548467 1.197586 2.901961 0.838568289 2.107703 1.01665  
1.404309868 3.882405 0.8620186 1.662428 2.133442792 2.523405 0.8385219  
1.492516655 1.997503 1.881855114 0.6348527 1.700412 2.183540237 1.221035  
0.824801083 0.9423866 1.124508 1.27492 1.379107 0.9019885 1.085241109  
2.06955 0.9866214 1.56351 2.417823 1.373588 1.646147 2.304391 1.7143  
2.626071879 0.981070652 0.231757 3.156926 0.9199564 1.661347 2.276772688  
0.1926683 1.116146313 1.540617 0.9860015 1.530723864 2.404072826  
0.7847827 0.5960945 1.994728845 0.2811291 2.701317 0.9024116  
1.588052 2.965486 2.724905 0.8491805 1.750189 1.123874 1.777791 1.69845  
1.007088 2.626718 2.518953864 1.606453 1.862192 1.3563677 1.23955 1.76742  
2.049978 2.754016 1.252086 1.088680579 0.4423078 2.769581 2.880532 0.3587072  
2.059842 0.843973414 0.7363165 0.8544395 1.823844 2.314520165 1.956457105  
2.435673 2.351227 1.004508 2.93892645 2.551912 1.865436 1.697101347 2.858144  
1.610974 2.21662 0.7893805 3.544747 1.029905 3.004619821 1.680856 1.934364398  
2.1398 1.074395 2.506073 2.929498 1.525848 2.828076 0.945921 0.904413429  
1.565507 0.607176 1.279773451 1.436698 2.290345 2.256601 2.917204 0.4669146  
3.276879 2.473782 0.9278964 0.975370156 0.8754104 2.418109889 2.085494  
2.691684 1.446456 2.086663661 0.817652165 3.223317 1.296203 3.893923 0.9613021  
1.315549 1.534358226 2.614323 4.788917 2.743897 0.400696564 2.055292 1.456669  
1.308214847 2.056337 2.457856305 0.6541896 1.530509 1.621733539 1.511885  
1.988927 0.47802718 2.462834449 2.265836 1.829648 2.133788 3.104789 1.280726  
1.065308 1.873177 0.9096375 0.861585 1.579459773 1.32278 2.707829859  
0.8237201 2.22582996 2.779647 2.461081 1.024854449 1.713851 1.222382  
1.242385 1.092306243 2.33736 1.031396 0.987829152 2.977114267 0.8155494  
1.135073 4.130187 0.562030116 2.312001616 0.67875777 1.304444 1.382974  
0.6400364 1.821212 1.417198 2.337928 2.140574 0.8556545 1.88439 2.048416  
1.880885 2.034720975 2.484563 0.67103 2.224646 2.163684 7.206853 2.209856  
1.770336 2.608194 1.84423 1.381534 3.477403951 1.014507 0.8626339 2.474687  
2.190889 1.162341165 0.8070404 0.5476696 2.182689 1.088314 1.174643  
1.628104 2.227024 1.55532632 2.134189 2.48442 2.231837776 0.7707558  
2.552581 1.410899 2.575904 2.158846 1.865053272 0.322233505 1.702035 3.027989  
1.05157 1.962020348 1.815332803 0.948441308 1.208777 1.962753 2.496286  
0.4458263 1.066621 1.783496 1.781189 1.648273381 0.527326492 0.7270212  
1.953770782 6.036794 1.612914598 2.584903 2.164723 4.135589 1.293039 1.731198  
1.827583 1.355487 1.964952 2.00238 2.080709762 1.416644 2.901572 1.553435  
1.480462 1.42437113 3.226124 1.941115 3.574226 1.341081976 0.9080837  
1.544374 1.293027 1.646197 2.772367 3.086379 1.691791 1.143026988 0.498114968

1.620357985 2.248963 1.587841005 2.047422383 1.273281 2.793383 1.320978118  
2.41875 1.388508 1.643489 1.446511417 1.63895 2.111107 1.298242 0.731497966  
1.333249 1.146909 1.974601 0.8211949 1.878745 0.6584797 2.459497 1.306577  
1.013142 1.397507 2.104471 2.825805353 1.91371 1.315787 2.006853 1.708809  
1.834295 2.344721 1.720914 1.752356112 2.038494076 2.033512255 2.198908  
2.125247 2.262759 0.5928075 2.69079 1.446760955 2.615427 2.303628 1.819243  
2.107675 0.8160138 1.299015565 0.8683103 0.6392377 2.249696 1.927102  
1.200236 1.779421 0.4865289 2.295759647 1.262998 2.128997 0.98174357  
3.713647 1.877962 2.604016 3.012197 2.207985 3.045616443 2.020185351 0.855555938  
0.8201855 1.822726 3.038633 2.148825 1.510167 0.9743425 2.04813649  
1.684199 0.936207788 2.338864 3.160161 2.022427 1.571309 0.7920698 2.649062674  
1.653924 1.608867 2.205924 1.916789 0.6385378 0.6204523 2.335331 2.098820516  
1.304163 1.452586288 0.9878941 1.347793 2.689176312 1.23883 2.367651  
1.178227 2.052317888 1.844606 2.33595 3.016111 0.817018288 2.433056 1.707949  
0.8690589 1.449897 3.358021 1.527029 1.382954  
AC087481.3 4.448748 2.292461866 1.457338 3.62079063 2.968694723 1.901412374  
2.815126 2.117600317 0.606855 1.0478 1.381032764 2.752055 2.798277 4.47127  
3.756659 3.311722 2.689726 1.925507922 1.970043 1.907165 1.758375211 2.231877  
5.962282379 4.396707 2.944159 2.024990075 3.129872 1.168171 1.577593 2.617766  
3.630781 1.580959504 4.081229 3.638838734 2.495818 3.38710658 4.074800892  
2.873767597 3.031056 2.987955 2.123919822 4.739411 1.107835445 6.401234  
1.901566772 4.602299 3.463545 2.393358 1.477648327 1.540465 3.222742 8.346927  
4.570752626 2.821752 1.987995404 4.198824 1.843064 4.642098 0.9421782  
3.575782 1.20827 2.233048 3.431278404 1.636414 1.24517 1.992146 1.472363  
2.264312 4.37043 1.146721 2.497432 5.356085655 1.549118 0.8487592 1.872297879  
1.963812 0.746888925 5.327628 2.137507 3.39187 1.777351 2.28332 2.676907  
0.80914619 5.643609746 1.760557 1.154023 2.894992 2.215189245 1.449778  
1.511304 1.213573 4.310935553 1.441517 2.983242 1.73761427 2.184629 2.404568504  
2.057307582 1.546986 0.991752598 1.331832 1.533723 1.025595544 4.953412  
1.671126 1.190104331 4.131774 5.446447867 1.5543995 0.9131162 4.928916813  
2.17978 4.336172 2.896772 1.683967 2.054417 3.221919843 2.639266 4.613124  
2.319204 2.407695 1.310111 3.302985 3.032993 6.750402 1.883041 3.474714 6.641875  
5.008865759 3.862709592 1.629275 2.876613958 2.784527869 1.448518 5.150746778  
2.670033 1.238109 0.428959996 5.467919564 1.311555341 2.471856287 3.890966  
2.291139 3.109874 3.422804 4.523689 4.92385 3.450935742 2.776885 4.175505  
2.163755745 5.979296 2.396534 1.568507219 5.441466 2.068179 1.334448164  
2.651621 1.606028 1.181256426 4.667864 5.330861 1.845784 3.380166383 2.954066  
2.916059 1.403889153 0.9286491 1.838093095 3.960386 1.770709 1.580972287  
1.965776 7.218969143 3.460219 5.524518 1.303192 1.699458 0.7427145 2.468207287  
1.473874 0.9148535 5.658677 3.981763 3.973956 1.160449 4.371632 5.230124  
3.695167774 2.016098463 4.945209 1.98869 3.355364 1.153897 3.288236445  
1.994025 3.638194345 4.082448 2.379684 1.698782519 4.290970242 1.766718  
1.437598 2.597716693 2.114172 1.208034 2.190754 2.854475 3.410153 2.581526  
2.955728 0.7028215 0.6318378 4.522844 4.562864 1.079231 1.471568 3.113913743

4.339774 2.326484 1.488390073 2.067735 4.22701 3.060982 2.015347 1.432561  
3.29359529 4.963857 1.583316 3.55061 0.4927016 2.89509 1.123292669  
0.7747811 3.10823 1.359377 4.214161979 1.052548479 4.31338 1.650505  
2.283708 2.709392181 2.589035 2.196968 2.201779118 4.334235 4.146866 0.9869848  
2.368358 1.187844 1.590081 4.674055759 1.928326 0.892178063 2.270947 7.380041  
2.964868 0.9691373 3.13381 1.959747 2.966616 1.580543875 4.343462 3.766158  
0.909325726 2.601221 0.927247 2.883302 2.055377 1.978676 2.798632 1.501379  
5.026906 3.684562528 0.9920863 2.064991439 3.14295 3.683782 2.407353  
3.837536552 3.31014389 9.609818 5.642065 4.251655 0.7615299 2.090878  
1.764430949 1.488851 8.60793 1.744617 2.252701699 1.629718 0.6235066  
1.351450688 0.6805451 2.047108134 1.075729 4.106676 3.315391902 2.412734  
3.164753 0.24431379 3.146810648 1.222376 1.591196 3.211072 2.961318 2.73242  
3.580276 3.415757 2.270284 1.519192 3.146410624 0.743662 0.947338776 4.81135  
2.773979686 4.935825 1.293766 2.11827019 2.741654 1.445837 1.302779 1.159471853  
0.6952156 1.036697 0.899294834 2.254172326 2.209131 2.07995 2.196176  
4.404448608 3.333900052 4.509761237 0.8333562 1.631925 0.245336 1.050132  
1.615021 2.143002 1.728944 1.488551 3.239479 1.356864 2.110347 1.91564349 1.93328  
1.689054 3.429111 1.667255 10.39868 2.926251 2.379084 1.594858 3.571431 1.936963  
4.53382193 4.234433 1.154072 2.958686 1.464706 3.396032762 1.095619 7.337567  
3.72537 0.8979041 4.435887 1.38684 1.535964 1.792959305 1.17722 1.17906  
1.069373169 1.247425 6.37567 2.796672 1.197551 3.040967 1.992464661 1.819819674  
3.044611 4.328704 4.235063 1.026084461 4.245666789 3.235617038 1.604541  
2.320822 3.667985 1.96526 2.845615 1.286856 1.420136 5.379950391 4.357079225  
1.172773 3.744555406 12.88579 1.90819612 2.689407 2.489317 1.701412 6.80682  
3.835905 3.251457 3.064186 1.219462 1.946669 2.806260556 5.792236 0.9218385  
1.389397 2.323984 4.125211424 1.879668 3.091598 3.217424 1.77312698 2.395408  
2.5349 2.190596 1.338513 3.480024 1.651708 1.933461 5.330706115 3.648985823  
4.323403767 1.21605 2.038251149 0.820892396 4.880688 1.144592 3.073273493  
3.227837 1.312851 1.252314 3.296019591 1.449774 1.723991 1.1175 1.374483723  
2.231058 2.525708 0.8435055 1.149186 2.097836 3.921995 1.651664 0.9807954  
4.207161 3.720736 3.239823 1.676024878 3.535036 8.370007 3.44695 3.237096  
1.249981 1.761001 1.482447 0.642501075 1.009792241 1.466159575 1.081265 2.51476  
1.104575 2.954022 4.31494 4.898668428 2.253315 4.965784 0.7124383 1.346508  
1.499792 0.782913687 4.085861 5.853492 2.13989 4.00015 6.190757 5.493312  
1.876244 2.227162503 1.403968 2.368893 1.415671562 0.8481684 3.150123 3.17415  
4.083013 2.445027 3.919238357 4.040616846 1.697613446 0.5832163 4.478204  
1.553008 1.400957 2.731083 1.74291 2.873879375 1.721547 3.181920153 0.5279526  
3.761797 6.06987 2.64346 2.415409 3.363267483 2.363709 1.361317 2.191197  
2.514427 2.438551 3.646713 2.976619 3.45722263 3.216063 1.44502644 0.788907  
0.2731609 3.428622698 6.193006 1.70777 2.308347 2.912117379 0.635335  
4.805347 4.543831 1.570418605 2.906692 0.9423478 1.61189 1.136799 2.863731  
3.416441 2.848032  
AC108134.3 0.0834536 3.479104787 0.4187828 2.128628086 1.085530315  
0.860887057 0.7263745 0.881690146 0.3130129 0.4276088 0.382566085

1.786779 1.015265 1.788238 0.8072511 2.059977 0.4652804 0.394609798  
0.4036851 0.810589 0.703243998 1.845635 1.312098438 1.331806 0.7392141  
1.436991833 1.476613 0.2109679 0.06401602 1.052488 0.5134701 1.123175016  
0.9798223 1.557724794 1.003011 1.874260981 2.771003198 1.714647864  
1.443142 2.158745 1.372921452 2.593316 0.48213243 0.171184 1.927956082  
1.135461 1.679484 1.378027 0.599856951 0.1753888 2.415655 0.6401279  
2.950727033 1.40428 0.649850715 2.998707 0.1449111 2.279258 0.3341212  
1.133 0.1855741 3.671468 0.648392826 0.572736 0.3289092 1.018387  
0.0969151 1.507317 1.858463 0.177073 0.5561799 5.424979548 0.3006375  
0.11546 0.663051528 0.70513 0.151054619 1.322926 0.2109429 1.110266  
0.4865822 0.3413086 1.258982 0.876774937 1.429903965 0.0925657  
0.4590357 0.8090371 0.89027311 1.155529 0.4131444 0.4588448  
2.317082405 0.8395064 1.641491 0.156626757 0.993569 4.355188754 0.617346122  
0.5028852 0.511541236 0.2282796 0.6068837 0.620726909 2.366183  
0.3119326 0.218334831 1.455869 1.673670032 1.077784362 0.3856058  
2.148489383 1.277334 1.757137 2.000177 0.7715129 1.28829 1.606533261  
2.873109 2.524258 0.4911499 0.1792336 0.956678 0.8331503 1.692263  
0.2546937 0.4584636 1.787567 2.135329 3.376254117 1.994863169 0.3839855  
5.059632017 1.430321308 0.5226947 2.758912443 0.8768857 0.08038456  
0.326777369 2.106681282 0.242326194 1.310724624 0.5369744 0.7108937  
0.7673539 0.5680859 4.650672 1.702591 2.555117991 0.7252809 1.988036  
3.915947673 2.318397 1.656928 0.403269594 1.481971 1.200469 0.890425453  
1.933182 1.804822 0.736839058 1.417107 1.557484 0.3452476 1.809032753  
1.879464 1.423876 0.846147403 0.2283939 0.961647832 1.063214 0.8378954  
0.836859086 1.069649 2.032145655 1.937141 4.145585 0.5467928 1.051514  
0.2072946 0.977098933 0.8916213 0.2160745 6.251079 2.712943 0.3223092  
0.1864726 4.063037 2.55401 1.929205448 0.149207578 2.833867 0.7905326  
1.816324 0.8396365 1.914191419 0.8966485 1.729194398 1.772584 0.5398469  
0.534780365 3.051016383 0.6820277 0.2991711 2.604325757 1.202053  
1.091644 0.519418 1.444215 1.026437 1.431269 1.346711 0.365047 0.09116053  
2.408167 2.893087 0.2727316 0.2458389 1.229747197 1.60204 1.925857  
0.800871887 0.6283962 0.3804563 3.271793 0.8529282 0.6439839  
2.02533891 2.273693 0.5836228 2.272914 0.03273271 0.7339565 0.436413603  
0.5691411 0.8622478 0.787765 2.616586962 0.263097431 2.071461 0.8168559  
1.883838 2.83798274 1.279029 1.588762 1.048308107 1.715862 1.649318 0.3187296  
0.1387292 0.891054 0.5168941 3.125620347 1.279265 0.137767335 0.6136768  
4.815755 2.523992 0.2155156 2.372178 0.3812886 1.522319 1.56539694  
3.210848 2.760224 0.364586896 0.8479749 0.2442228 0.8628989 1.034378  
1.675869 0.440663 0.7054289 3.104651 1.625297112 0.4028874 1.564151498  
0.9564059 1.74664 1.055935 1.360977525 1.335167503 0.5490496 1.19858  
2.54544 0.1052648 0.6558629 0.214137653 0.4453156 1.599856 0.4173096  
2.102448226 0.7281326 0.2126781 1.026134825 0.3322233 0.498408937  
0.1972565 2.137433 2.021275514 0.439227 1.229315 1.57035174 1.765217089  
0.2527088 0.7863223 1.940941 1.388656 1.706826 2.851534 1.983643 12.99323



0.5660731 3.223241436 0.1517449 0.647152471 0.5154241 0.337477038  
1.769033 0.6288193 1.122238808 0.8007276 0.4971704 0.3596566  
0.935411577 0.3496533 0.2760761 0.473241681 1.589756733 0.8335087  
0.5962028 0.3273971 1.340282174 1.185475798 2.911082534 0.2777435  
0.2227041 0.1362772 0.3494231 0.4753458 0.528713 2.511404 0.4564682  
1.688277 0.1672459 0.5899929 0.566788593 1.324662 0.3673965 1.459895  
0.8626619 1.988957 1.136593 0.562562 0.4986722 0.452278 0.599673 1.463556014  
2.045481 0.5000843 2.838878 0.6139043 2.800137721 0.9757825 3.39836  
1.573724 0.2156461 3.870692 0.2971351 0.6468082 0.50462741 0.2279985  
0.4484335 0.580429304 0.4219975 2.31425 1.879013 0.3738241 1.230041  
0.53893382 1.152653063 1.059789 1.393562 1.06705 0.199856434 2.722463498  
1.540537624 0.5760277 0.7649906 1.227539 1.017062 2.1335 0.153174  
0.5461237 3.322650639 3.143809726 0.3317103 2.620018278 2.624728  
0.392483995 1.010903 1.102904 0.8029368 2.850693 1.564338 0.4475357  
2.270834 0.3756878 0.2383317 1.223598216 4.502956 0.3434905 0.7323949  
0.3859856 2.131615437 0.5024254 0.3460222 3.080585 1.223762588  
1.047833 0.3685783 0.5069249 0.3414059 2.090591 0.6122563 1.595251  
1.937062542 3.381772392 5.81005657 0.1665571 1.671329506 0.360777398  
1.137854 0.3867471 1.285778601 0.920591 0.4865432 0.4144665 2.331945127  
0.1495573 0.05025455 0.4738681 0.549710564 0.125586 0.5171319  
0.570141 1.041961 0.2236162 0.5916309 0.6576431 0.7749797 3.684838  
0.3677469 1.948472 0.407482574 0.2594497 0.6517981 0.588415 1.613558  
0.243466 0.6262249 0.3748617 0.203937831 0.538016745 0.874791471  
0.5350788 2.698195 1.196531 4.089567 3.261848 2.14165234 0.804634 1.830865  
0.1811011 0.3205488 0.7789954 0.50993542 0.3606556 3.25361  
0.2645947 0.814471 0.5187969 2.954187 2.77681 1.427651885 0.4033782  
2.396058 0.588707683 0.2117983 1.05457 2.575816 1.166399 0.6424089  
2.011598708 3.672734001 0.257175363 0.06508128 2.661236 0.5156454  
0.3016682 0.9752398 0.4916232 1.07380429 1.296311 0.392981338  
0.2134257 3.314437 0.5183113 0.5735396 0.06745934 1.672938668  
1.363903 1.526847 2.012948 1.399285 0.3366583 1.951124 1.548897 2.246493429  
2.582459 0.511269059 0.4958096 0.1866035 1.319314024 3.787027 1.282377  
0.6988505 1.12366726 0.5269265 2.330547 1.81777 0.635333652 0.4551429  
0.4675607 0.2046536 0.1082503 0.9264034 0.7621278 0.2474454  
AC034236.2 1.364833 1.083554375 0.4362104 1.701198391 2.095419058 1.173273714  
1.271268 0.746333367 0.1983063 0.2817438 0.521855189 0.7759324  
0.5457138 2.040876 1.153717 1.355486 0.6131297 0.768185624 0.2835825  
0.1532204 0.672278175 0.6021055 2.018568034 1.498176 1.271754 1.062124398  
1.115496 0.4580779 1.792607 1.494144 0.6872047 0.486868281 1.149341  
1.473482547 0.6767901 1.285104306 2.110323561 1.155426742 0.5790497  
2.534086 0.893650555 1.645816 0.570174004 1.899186 0.908780611 1.710374  
5.021716 1.833375 0.347660364 0.4070883 1.152737 5.62986 1.819734531  
0.6608964 1.210059586 1.077228 1.034359 2.138204 0.3286908 1.466365  
1.482541 3.193921 2.528732022 0.4079626 0.2307585 1.12244 0.6225923

1.488072 1.795552 0.2187567 0.6002311 0.753893039 0.3664566 0.5348991  
1.938622645 0.5488376 0.474309158 1.774159 0.4663363 3.275279 0.5924135  
0.3904203 1.257722 0.240704672 1.898996839 0.8894356 0.4639864  
1.776867 0.971035841 0.9140055 0.4763735 0.6298429 0.622060413  
1.273668 1.305637 0.65491387 0.9973103 2.799566266 0.274561812 0.6275416  
0.583347646 0.3258868 0.536404 0.368087202 1.996794 1.094654 0.488085868  
0.7564524 2.782404237 0.701256044 0.2522006 2.27935747 0.4931322  
2.884101 3.827668 0.6852568 0.7564814 1.240448236 3.662489 1.376432  
0.8434511 0.8118949 0.5628017 1.033411 2.164961 1.168699 0.4111555  
1.333681 4.044923 2.846898214 1.317339724 0.8912541 3.160303231 1.353685263  
0.690582 1.082022449 0.9973311 0.430332 0.156995214 2.087724023 0.268665998  
0.661325152 1.061408 0.8984302 0.9435412 2.112536 1.856142 0.7766353  
1.209616625 0.6160101 1.262536 0.824374445 3.201115 0.4273904 0.341359779  
1.36105 0.252024 1.134411014 1.02354 2.917344 0.92348638 1.147999 2.073128  
0.5256107 1.20377955 0.7893423 1.468625 0.496414156 0.4774993  
0.201146805 2.144257 0.5878568 0.547015256 1.358155 2.888648067 2.609354  
5.189082 0.4407582 0.7001941 0.7833419 1.794355176 0.4181667  
0.3982904 2.109643 1.184494 0.6341417 0.3156908 2.219143 0.9886398  
1.359057751 0.430107061 2.682335 0.8276499 1.558783 0.4097936 1.268916651  
1.303203 1.357061372 1.037035 2.157227 0.58507064 0.689358981 0.6515948  
0.6831946 0.714976388 1.533314 0.7444003 1.325118 1.933883 0.9222288  
1.448522 0.8274645 0.4660131 0.4054322 0.866983 3.286105 1.377033  
0.3037103 1.618623428 0.9831152 0.4354111 0.35978186 1.324925  
1.205696 1.595043 1.166608 1.137765 2.502111237 2.338004 0.6695091 1.553614  
0.2695874 0.6634629 0.803434733 1.041658 2.40242 0.7493243 1.198311268  
0.433375395 1.603551 0.2725122 0.9371681 0.72693314 1.339665 1.812406  
0.971312806 4.081287 1.441066 0.2826993 0.9580069 0.6333436 0.3870139  
1.388750211 0.9245927 0.567327598 0.6957809 4.224656 1.590466 0.9762454  
1.410084 0.4825342 0.6204302 1.990905522 2.666873 2.339702 0.750686684  
0.5973109 0.5879549 1.32446 0.6953143 1.005945 0.9591752 0.6507121  
2.845242 1.313101621 0.7780585 0.552102454 1.639698 1.249729 0.6132293  
0.966651562 0.983214032 0.645998 1.571653 1.936804 2.3408 0.569108 0.461260485  
0.4715524 2.34248 0.3927968 0.843204944 0.681468 0.2627433 0.878597575  
0.3648266 0.588370203 0.2394161 1.600359 0.85614559 3.107326 0.5181916  
1.72446079 1.144223707 0.340579 0.7008458 1.109831 1.156847 1.378884 2.65908  
1.703253 1.941539 0.608675 1.456830908 0.4317403 0.52330554 1.12022  
0.545599524 0.9106123 0.866685 0.833663115 1.26744 0.377973 0.4250028  
0.833555438 0.2649373 0.3100595 0.334082592 1.292753828 1.343539  
1.423167 1.22908 1.734636716 2.060286799 4.705878213 1.111073 0.4646632  
0.1282723 0.3088432 0.6793607 0.3896126 1.057181 0.8211503  
1.150141 0.2268727 0.636113 0.59558325 0.6378126 1.210355 1.003163  
0.6904767 1.479583 0.7851166 0.4069768 0.4480448 1.403362 1.066358  
1.653408825 0.5809185 1.586465 0.7262302 0.4656963 2.830336835  
2.532277 4.73931 3.394222 0.2804316 1.118221 0.6423931 0.568707 0.872786016

0.2190769 0.5170633 0.553523493 0.9654395 1.707994 1.341219 0.6810734  
0.6252511 0.996754488 0.794335612 0.6922562 1.807363 2.453124 0.548674187  
2.633727775 2.409276561 1.16081 0.6600505 0.7400135 1.932191 1.846938  
0.4520536 0.5782999 1.948238661 2.184128831 0.8332521 1.710960813  
2.535365 0.431001057 1.876085 2.535258 0.9081864 2.643261 1.07895 0.737183  
1.37919 0.6188348 0.4318393 1.100425982 3.850604 0.4243494 0.4961825  
0.6357974 1.727057367 0.3103491 0.637823 0.9497086 0.920250959  
0.8101613 0.6606938 0.4750914 0.4498923 0.7876391 0.8538731  
1.539892 3.558901242 3.294365332 1.977109071 0.4997157 0.521742123  
0.519990033 1.042733 0.4922672 1.902837527 1.677986 0.5426392 1.113897  
1.220001106 0.8148548 0.7864057 0.7497464 0.776130834 0.866251  
0.8619629 0.5758871 0.5642709 0.6507369 1.507488 0.6448054  
0.3764187 1.675146 0.9379425 0.5940722 0.419504575 1.175259 0.7911069  
0.5241809 0.6477139 0.3007788 0.3696283 0.3921795 0.503891112  
0.848512202 0.436654805 0.5108023 1.083342 1.002908 2.708799 0.6085364  
1.981333636 0.6402342 2.02171 0.4474659 0.5808105 0.7264979  
0.397879653 2.061256 2.391428 0.9693721 2.175019 2.202878 5.849735 5.597802  
0.779618217 1.271941 0.8533618 0.632427535 0.4744703 0.7961673  
1.111608 2.236265 1.433352 1.24256827 1.880326365 1.119568559 0.7932964  
0.9080315 0.6490497 0.4803457 1.490013 0.6461204 0.794829614  
1.177712 0.591032047 0.4687412 1.599386 1.254776 1.125812 0.3492323  
1.06181891 1.510028 1.182279 1.048201 1.200473 0.8424821 1.276952 1.095882  
2.080428972 0.558684 0.38209335 0.5104375 0.4610613 0.547641515  
2.583653 1.630173 0.4722667 1.566779328 1.036725 2.153523 1.602551 0.832948269  
0.5028567 0.6534762 0.345534 0.2179349 0.9155857 1.854966 0.5706307  
AL133243.2 0.2243032 1.638217756 0.9471053 1.483284195 0.61048524  
0.729367914 1.909878 1.041783175 0.4924015 1.165966 1.564721248 0.9921231  
1.459932 1.023962 0.4369913 1.167972 1.217938 0.420613192 0.9129609  
0.9674341 1.51006573 0.9705565 1.053063116 0.8414341 1.518437  
1.100127616 0.9746416 1.474729 0.5341329 2.310969 0.5355325 0.967128849  
0.9877168 0.807439222 1.314739 1.012043859 1.261395497 0.78205867  
1.543744 1.248296 0.79701627 0.468354 0.778669155 0.3130101 1.577094241  
1.381012 1.000514 0.5419446 1.326683418 0.6130101 0.7802383 1.664406  
1.084431559 1.566437 1.201848201 0.5219113 0.948314 1.934257 1.305841  
0.3824926 0.6223889 1.698748 0.857990507 1.20292 1.604348 0.7718004  
0.7372842 0.7185729 1.315599 1.388128 0.9569904 1.325816457 0.6197324  
1.641032 1.292684605 1.121919 1.86119372 1.867464 0.8536891 0.8256479  
0.8133674 1.954366 1.172901 1.586563857 2.061562498 0.7572 0.9131415  
0.5606945 1.289209037 1.048185 0.5745282 0.7340007 1.696439704  
0.9397325 0.781745 0.473068849 2.082679 1.013748966 0.73729636 0.3864356  
1.212425312 0.7718412 2.288463 1.137389201 0.8485994 1.486614 3.712346341  
1.15895 1.140904001 0.775845168 0.8535186 0.843994041 1.208138 1.957259  
2.358013 0.890976 0.9465033 1.587950596 1.796363 1.146363 1.658358 1.649425  
0.5331834 0.6568947 0.8582623 1.622099 0.9750765 1.591277 1.097943

0.92060723 0.874717083 1.123165 0.666660026 0.954491829 1.202545 1.276182399  
1.241051 0.6685159 1.893433952 0.980736355 1.135988124 0.888662423  
0.4502337 1.35354 1.105116 0.6618483 1.257448 1.414169 0.946314714  
1.056797 1.097222 1.939216486 0.9482399 1.16921 0.696413335 1.569849  
1.318961 0.773903862 1.032731 1.40738 1.720878795 1.843338 0.836493 1.317947  
0.686006186 0.8247124 0.8708411 0.853348019 0.8838464 1.211177378  
1.204232 0.5457893 0.967079778 1.08462 1.391425689 1.599417 1.309452  
0.3235671 0.7137437 1.685723 1.166517032 1.732226 0.7322579 1.335364  
1.082874 0.4833644 0.9152228 1.819244 1.556465 1.10170379 0.585858353  
1.17637 0.832994 0.6242764 0.686834 0.916586084 0.6327982 0.844259222  
1.639997 1.030405 0.940207371 1.31414586 1.115816 1.579595 0.607042001  
0.9473211 0.7873585 0.9015979 0.8920683 0.8549059 2.034013  
0.8131063 0.7465336 0.7457055 1.049834 1.586392 0.8729926 0.6334636  
1.767463371 1.473231 1.112031 0.845705622 0.9149852 0.7509835 0.4920682  
1.358037 0.9261265 0.817891569 1.10054 1.185003 0.8347762 0.1204911  
0.9811193 0.650985868 1.138048 1.395654 1.325109 1.09419738 0.707142456  
1.199956 0.85428 1.396213 0.899723351 0.8643046 1.307701 0.613913708  
0.6737272 1.935757 1.083012 1.614941 1.33797 0.7303365 0.953192932  
0.9930654 1.1269555 2.301358 0.9880461 1.108542 1.227282 0.7930631  
0.7074787 1.193926 0.783989353 1.869724 1.730508 0.848111552 1.022228  
0.6838538 1.187133 1.231874 0.4414709 1.313135 1.223347 1.606904 1.063612077  
0.4886689 0.996179927 1.931933 1.026932 0.8305472 1.256290501 0.411175581  
16.61781 2.425336 0.9195521 0.258324 1.235877 1.131851581 0.7359825  
13.23245 0.7217429 1.15153914 0.8302615 0.848121 1.379595123 1.107183  
0.788230198 0.4076425 1.629236 0.732233641 1.068668 1.251057 2.28367828  
0.695245555 0.8456697 0.8018251 0.8393657 0.9270314 0.8715175  
0.4048303 1.367166 1.032082 1.131913 0.771703973 0.9591814 1.010633599  
0.2810826 1.431426357 1.032118 0.8608038 1.071007672 1.043916 0.4796882  
0.8058631 0.564476581 1.750449 1.005988 1.032314981 1.909510629 0.1558449  
0.8679441 1.046348 1.286555469 1.331331502 1.00065477 1.395645 1.06876  
3.662803 0.9760146 1.166518 0.8422259 1.072834 1.110365 1.381034 0.5311424  
0.8950448 1.087157647 0.9002147 2.033622 0.8832944 1.411338 13.51454  
3.059172 0.5348077 1.084698 1.411047 0.4236488 1.811705174 1.615534  
1.302982 1.16112 0.9382875 1.018022515 0.5271154 1.004503 0.8206714  
0.5106357 0.8768157 0.9013494 0.993846 1.723406893 0.6838549  
0.692891 1.032896175 1.022814 1.794746 1.241032 1.010044 1.352068 1.423111455  
1.375843637 1.175825 1.12685 0.7975067 1.089901839 0.919084355 1.132746683  
0.7719635 0.8442965 0.8281598 0.8541565 1.668798 1.044153 0.9679293  
0.715844824 0.75225985 1.003971 1.0018558 12.48477 1.551776633 2.381565  
1.696657 1.103446 2.903299 2.118041 0.8426984 1.079261 0.7682943 0.8318233  
0.885871678 1.498066 3.664446 0.8406851 1.326114 1.630279603 0.8669337  
1.630912 0.9983451 0.739909778 0.8483953 0.5497979 0.6291567  
1.184124 1.300792 1.11519 0.8559262 1.231068372 0.941942268 1.949462882  
1.070504 0.893070869 0.874822395 1.022547 4.098356 0.690233477 1.036995

0.7877062 1.043884 2.015538014 1.025773 0.6988514 1.00988 1.36185984  
0.3467173 0.684891 0.7391731 0.7005522 2.80479 1.013296 1.6395  
1.186613 1.145198 0.5628282 0.8582412 0.541655198 0.6203745 2.665899  
1.247532 0.7875107 0.5393877 1.152586 0.6795849 1.00094348 1.086216594  
0.921594851 0.6068137 1.338091 1.195323 1.079707 1.26778 1.043940816  
1.282935 1.153763 0.9452942 0.7167163 1.461878 0.51226994 0.5095821  
0.4877644 0.8732318 0.7772897 0.4998287 1.636751 1.135734 1.256695904  
0.4996671 0.715138 1.287678642 0.533622 1.452131 1.15849 0.9384889  
1.480952 1.158355985 0.753986513 0.796411834 0.4471939 1.251733 0.8834028  
0.7156291 1.387408 0.9069867 0.845030034 0.8636248 0.265557274  
1.280291 0.6688558 0.4625299 1.485683 3.642055 1.067168399 1.298591  
1.857459 0.987971 0.4387763 1.1863 1.38229 0.6887822 0.93153379 1.15846  
0.898409321 1.281261 1.23503 0.699332472 1.999725 0.6043161 0.9381238  
1.104622671 1.516598 1.476312 1.424132 1.028816742 0.6356564 1.019923  
0.3515597 0.8953407 0.8510795 1.805158 0.4534067  
AC005332.4 1.561138 3.238653655 1.018237 0.980218783 1.03199824 1.606365565  
1.501204 1.741209779 0.5573347 1.866465 2.885881538 2.076893 1.569053  
1.013696 3.281748 2.818425 1.371515 0.569397516 1.429106 1.080949 0.83881952  
1.926019 2.423156206 3.293995 2.444384 1.985987217 1.508606 0.9893443  
2.091437 1.492864 2.283687 1.282321206 1.066913 2.284791236 1.134867 2.930923011  
1.740580566 1.85559806 1.590696 2.765102 1.750052405 2.427842 1.708744661  
1.438458 1.940637974 1.778526 1.919616 2.5588 1.168100494 1.265376 3.092322  
1.587549 1.772334479 2.146902 1.158528179 2.21526 0.6788416 2.353769  
0.5647009 1.617548 1.4482 6.244803 0.706279268 0.6756563 0.652569  
1.337109 1.224205 2.23138 2.324237 0.4684266 1.610832 2.638082324 1.177048  
0.6204177 2.068290859 1.562992 0.861632874 1.099448 1.064654 2.042608  
1.441102 0.9405139 1.742342 1.256346332 3.156147504 0.7448192 1.649001  
1.419379 1.217340621 1.997526 1.140742 1.058722 2.014971968 2.039647 1.918379  
1.394407791 0.6057581 2.646119549 1.412648038 1.733455 1.77827552  
0.8454427 1.106189 0.985237564 1.626536 0.5291931 1.526461485 2.113066  
4.13028745 1.953042023 0.6750506 2.76954348 1.478331 2.744479 2.502965  
2.34109 2.563908 1.505173431 2.940951 1.692436 1.644835 1.148313 1.001189  
0.9293995 2.298034 1.973164 0.9230858 3.358843 2.763863 2.751220112  
0.891416244 1.477513 3.61566085 1.817197034 1.015442 2.595707095 1.518852  
0.8683136 0.801419459 2.50331295 0.955405768 2.491198363 1.873291  
2.091344 2.215788 1.514192 3.14463 1.628373 2.42828275 1.026777 1.560312  
1.416840605 2.965061 1.830354 1.007537066 2.41146 1.486666 1.637822154  
3.078845 5.242974 0.607366936 1.912808 1.779155 2.027279 1.901559292 2.387174  
2.552205 2.09273848 1.81257 1.282060073 1.198966 1.159588 1.634006869 2.10012  
2.65803976 3.029194 2.870609 1.623441 1.27986 0.7338539 1.161415473  
1.212101 1.136397 3.396833 1.805004 2.676319 0.5481024 1.423679 1.587741  
2.110407157 1.845277276 5.790341 1.860871 1.473766 1.213413 1.710568303  
0.8139153 3.167344276 1.867583 1.269426 1.050468113 1.178526029 1.659889  
1.537879 1.379741659 1.318492 1.451673 1.256763 1.241015 1.19104 2.013456

2.488145 1.448536 0.4642231 2.355571 5.088205 0.705796 0.7235021 1.565771671  
1.696591 1.935462 1.434880637 1.479492 1.252597 2.726568 2.145523 1.66237  
2.238070142 2.028659 1.63351 2.13718 0.2381243 1.704818 0.984705806  
1.536965 1.128356 2.061929 2.661666123 1.391988801 3.610093 1.073612 4.598849  
1.454814515 1.333183 2.395126 1.835656178 3.286322 3.224887 1.110705 1.256243  
1.36426 1.647077 1.849527074 1.666176 1.059176574 1.122684 2.780289 2.632684  
1.513016 2.551057 1.26697 1.940907 5.134094064 2.636358 3.784175 1.356290531  
1.062579 1.062278 1.495861 1.458706 1.793992 0.5308208 1.54889 1.97112  
2.108821555 1.515999 1.352169128 1.755554 1.674945 1.87119 2.171747604  
1.392036982 2.256482 1.700084 1.657782 0.6033429 1.378714 1.067591014  
1.262177 2.899866 0.7648762 3.554708126 1.145501 0.6417335 1.243036636  
1.074161 1.604155887 0.9269164 2.401486 1.546826632 1.526889 1.773243  
0.11539409 1.870034496 0.8508342 1.560095 2.272933 1.551751 1.121614  
2.680716 2.406035 2.283667 0.8839304 2.400306198 1.222518 1.291757999  
0.8616537 0.810094507 1.126931 1.026938 1.084177841 1.555578 1.374224  
0.5687901 1.328536065 0.9527172 1.551947 0.931478549 2.275772469  
1.220599 1.443527 0.795596 1.881319894 2.026467632 3.236032682 2.059893  
2.032528 1.351897 0.9187228 1.183504 1.19008 1.254909 0.8023751 1.364656  
0.8263031 1.787779 1.40889539 1.098446 1.838522 2.399459 1.478527 4.688728  
2.400532 1.32228 1.581518 1.398177 0.8562776 0.719514148 0.9212846  
1.482156 1.109421 1.383617 5.508820782 0.52357 6.345866 1.723787 1.246021  
2.654388 1.097177 1.242829 1.585234784 0.7162338 1.469669 0.835074663  
1.829568 3.140551 1.48201 1.228645 1.455373 2.282351836 1.306805524 0.9022924  
2.38352 3.64522 0.638842837 2.591184353 1.22488475 1.645397 1.525802  
1.288883 0.8519988 1.575769 0.5909231 1.676894 2.541053875 2.743909577  
1.645316 1.507176446 4.20034 1.456464712 1.666936 1.306391 1.175323 1.935238  
1.228233 1.144814 2.038768 1.863449 1.450103 2.306749369 3.761703 1.99717  
1.335915 1.449935 2.521480264 1.723689 2.255715 1.319258 1.935357379 2.658784  
1.469718 0.9941988 1.571482 1.404668 1.938187 1.712979 2.345343156 1.787615786  
2.507953817 0.8182719 2.112602982 1.00552401 1.208265 1.360252 2.703832476  
1.282535 1.414463 1.009864 1.930204955 0.8901827 2.215712 1.220576 1.454196924  
1.796084 0.8142939 1.415757 1.55755 1.676062 1.834093 0.9803186 0.7227991  
2.148713 5.209362 1.716089 1.018998582 4.071872 1.383944 1.080079 1.309241  
1.174071 1.000867 1.266369 0.643714898 1.052305601 1.33239606 1.576341  
1.728678 2.142872 2.074974 2.479006 2.0081475 0.9831097 2.66384 1.887812  
1.39916 1.583439 1.485057234 2.602019 2.031745 1.629206 1.012005 0.6328373  
2.958325 2.605174 1.405996404 1.326242 3.03006 1.45579246 0.8908586  
0.9996583 1.483497 1.922162 2.734521 1.435392773 2.579001249 1.31206161  
1.119073 2.558284 1.782314 1.795565 2.047084 1.535736 1.240527159 1.652754  
0.847489843 1.213876 1.32292 2.035926 1.523556 1.268313 1.278948962 2.040618  
2.468338 3.968002 1.364983 1.29307 1.866427 1.106857 1.869120122 1.55049  
0.757652862 0.8123027 1.054591 1.333216501 7.392124 1.631662 1.350995  
2.750897913 1.439098 2.941627 1.532352 1.612102961 0.8075803 2.501869  
0.6564327 0.7318186 1.234773 1.910803 1.080072

AC048382.2 0.2249176 0.236385168 0.1991772 0.722425991 0.594269931  
0.497184773 0.5243753 0.297032808 0 0.1152458 0.225544868 0.4961516  
0.8352799 0.7573531 0.991836 1.175003 0.8240488 0.483418877 0.6399886  
0.3939508 0.439986935 0.4522011 0.667219868 1.692554 0.7083634  
0.794434509 0.9606054 0.2067579 0.172531 0.485205 0.9687051 0.254913149  
0.7468761 0.415669137 0.4233984 1.418362705 0.749943921 0.644165195  
0.864321 1.103429 0.358082975 1.240526 0.066636189 1.248391 1.307189121  
1.409305 0.7872024 0.7856435 0.329325259 0.2578333 0.7823758  
0.4621133 0.960455217 0.4915204 0.304595987 1.289662 0.2278226  
1.051188 0.02501381 0.5331633 0 0.4329086 1.182130823 0.5006249  
0.06566299 0.9687096 0.1567188 0.4842599 1.637487 0.0795389  
0.5168871 1.584316877 0.09723057 0 0.446751182 0.6056256 0.076333241  
0.9781313 0.05984389 0.979299 0.3991213 0.3066228 0.81686 0.143213053  
1.541506226 0.08315861 0.02811721 0.3634089 0.356666765 0.5858568  
0.1113475 0.02748095 1.31106711 1.167011 0.5757284 0.422128212  
0.3347237 2.385724555 0.099829385 0.08214163 0 0.2871126 0.2393599  
0.334586944 1.162338 0.2193121 0.084062714 1.211358 1.54534777 0.49380925  
0.1222653 1.014145016 0.2151607 0.5709708 1.374105 0.244626 0.3857887  
0.766735958 0.5425297 1.126044 0.1126561 0.1509552 0.170002 0.3516957  
0.9729824 1.568984 0.3569555 0.7935055 0.6577111 1.679059013  
1.235118808 0.3449626 1.235505985 1.082074486 0.2934846 1.681863146  
1.087875 0 0.110088107 1.338659562 0.100476715 0.127299557 1.121589  
0.8258384 0.9903637 0.5103536 1.334165 1.411905 0.759125702 0.7330202  
1.291084 1.183178983 0.551326 0.4661914 0.271715183 0.8045652 0.1268789  
0.337472604 1.329123 0 0.143903704 0.9391662 1.399203 0.2819649  
0.968655076 0.6373662 0.7172934 0 0.1183749 0.575946262 0.6245299  
0.501829 0.644410655 0.2702657 3.286128218 0.4391352 2.378381 0.0627095  
0.3617819 0.09859134 0.462624462 0.06675079 0.1386541 2.217707  
1.145208 1.206476 0.02792036 1.191094 1.342257 0.850223539 0.080426524  
1.823909 0.325004 1.110679 0.1676239 1.157624626 0.6633741 1.659196361  
0.8895717 0.4849845 0.215119149 1.164298935 0.3308666 0.1832506  
0.30189142 0.3160662 0.03163564 0.8535944 0.6090051 0.5784236  
0.4903532 1.325074 0.09838463 0.1474132 1.088195 2.142094 0 0.2981546  
0.712423638 1.693213 0.3562052 0.274711488 0.4403372 1.025376 0.9490095  
0.5336373 0.1679627 0.587310766 1.196568 0.3932337 0.4167197  
0.04410932 0.2894784 0.242156329 0 0.3461072 0.1794188 0.790585309  
0 0.8625848 0.3065416 0.6474248 1.244287683 0.7868472 0.3723399  
0.610011882 0.6289262 1.159594 0.06607809 1.265481 0.1644862 0.7176538  
1.219252738 0.4573579 0.092824942 0.3866339 2.071574 0.5935039  
0.1563802 0.3891579 0.2506388 0.3383783 0.200901698 1.173373  
1.629009 0 0.9322009 0.07594732 0.387603 0.635449 0.4210456 0.04241574  
0.342219 1.247505 0.66748555 0.1872122 0.391446625 0.4208376 0.7649537  
0.7661967 1.043192775 2.03205981 10.46399 0.4675464 1.88048 0  
0.3472131 0.399549524 0.2204412 3.593172 0.2570743 0.29563588

0.2973343 0.1432983 0.219054138 0.0331623 0.358206098 0.1119222  
0.9491966 1.089516801 0.4249432 0.5217564 0 0.792912554 0  
0.08709183 1.032887 1.075459 1.025501 0.7304146 0.6597387 0.3877669  
0.4237878 0.63563625 0.1487167 0.095135718 1.196196 0.134746929  
1.472396 0.06917325 0.474442423 0.404636 0.1374292 0.1685771 0.123985981  
0.113083 0.06764171 0.121470861 0.379647062 0.1925492 0.2723456  
0.2667646 1.25322054 0.974746326 0.751186191 0.05346804 0.7202578  
0.2098764 0.1148461 0.1507194 0.4249839 0.188015 0.1618733  
0.8426134 0.3181751 0.2023767 0.316047802 0.6591003 0.1650297  
0.9778284 0.360208 3.371915 0.09881471 0.3892877 0.3054506 0.3685181  
0.2938531 1.11701577 1.235633 0.1497542 1.101298 0.2177035 0.990982468  
0.2977192 1.847192 0.9278016 0.2447126 1.187642 0.1001019 0.1413427  
0.510012154 0.204828 0.1611444 0.137221733 0.3369881 0.8100243  
0.9378092 0.4884856 0.8287778 0.254823223 0.950981807 0.2954752  
1.726814 0.8275772 0.044886455 1.009373807 1.306227298 0.1321247  
0.4581651 0.9208859 0.5847694 1.217162 0.2408132 0.1401781  
1.1792525 1.440977994 0.08939997 1.086349042 4.803307 0.11753247  
0.3995943 0.7098414 0.3173885 2.086103 1.038444 0.6372183 0.444482  
0.04602384 0.9849106 0.758102623 2.032347 0.3471558 0.191022 0.5409447  
1.214382541 0.3385244 0.4440819 0.7712754 0.286799079 0.5187008  
0.3213823 0.1884447 0.1472209 0.9890165 0.2640169 0 1.766979002  
2.842090121 1.265832027 0.2565096 0.399587139 0.104179188 0.5615003  
0.1895146 0.839259641 1.138868 0.3278233 0.1175829 0.553385352  
0.03100577 0.3160317 0.1008262 0.169318515 0.1692348 0.5641302  
0.1159698 0.230812 0.4017819 1.245717 0.1969365 0.2945553 1.388217  
1.150981 0.9341379 0.205915355 1.882592 1.201936 0.5501929 0.6943359  
0.246064 0.1125168 0.1092214 0.024983515 0.185109031 0.250055877  
0.1311002 0.3181484 0.08561409 0.349901 1.529939 1.937182859 0.4410685  
0.6944718 0.06972706 0.05759454 0.1543741 0.217000759 1.237105 2.06121  
0.5409838 0.465627 0.6835746 1.072879 1.522875 0.501873383 0.1553076  
0.6981263 0.310429369 0.1369974 0.2842194 0.5123349 0.669945  
0.5666303 1.640718266 1.452284591 0.297050986 0 1.024622 0.393319  
0.1084043 0.4190187 0.02819116 0.58613337 0.2161062 0 0  
0.4722192 1.523904 0.4379651 0.2857032 0.744568138 0.06026039  
0.2813701 0.9800251 0.3142702 0.06979501 1.267678 0.6163643  
0.613827754 1.090513 0.331724482 0.03036971 0 1.02404511 2.970548  
0.3756697 0.3380618 0.77038762 0.07889618 2.451164 1.207528 0.489229049  
0.2991867 0 0.08273495 0.1944984 0.5761777 0.6437997 0.613544  
AC109460.2 0.4777293 0.656769781 0.3290436 1.570003996 0.453111984  
0.560015815 0.4095122 0.579921197 0 0.06923191 0.391959449 1.45959  
0.5320597 1.985309 1.643333 1.257318 0.6779799 0.333966301 0.3604331  
0.6131622 0.213484785 0.6112168 1.563200834 1.590898 0.8976171  
0.984313087 0.8285033 0.139732 0.07773373 0.8071712 0.3273372  
0.387622054 0.7330993 0.936397507 0.7630476 1.3901978 0.872874289



1.274480685 1.198213 1.17508 1.008338048 1.567697 0.135103043 0.7581006  
0.765639342 1.088506 1.21919 0.2252544 0.269776936 0.1161666 1.435174  
2.206972 0.900083746 0.6422173 0.411706664 2.285489 0.2052907 1.095228  
0.1465095 0.4804329 0.247874 0.9613018 0.879961693 0.5075016  
0.2366754 0.9274596 0.1294509 1.103037 2.676221 0.1433448 0.512343  
2.692095114 0.1314215 0.05257555 0.657526099 0.5363194 0.229279332  
0.881393 0.3639955 0.1715866 0.1027565 0.1611735 1.344746 0.177442547  
1.172010571 0.281003 0.1140137 0.6549348 0.832697532 0.4723449  
0.07525131 0.1238153 1.507840918 1.319856 0.9556626 0.409639212  
0.5089823 0.38695928 0.239883065 0.1480355 0.095562649 0.1108786  
0.7009824 0 2.151378 0.7246137 0.378744094 1.281388 2.201673078  
0.523495262 0.1377164 1.532901222 0.3877621 0.7868842 0.6667257  
0.1653242 0.6662981 1.320847658 0.2666579 1.680559 0.1776499  
0.0272051 0.2936115 1.060438 0.8630541 0.7289959 1.162897 0.9959304  
1.222367 1.171353469 1.483952267 0.4803975 0.432955089 1.05123239  
0.3702421 1.814641815 0.4225356 0.1138781 0.148800409 1.393443659  
0.373475261 1.233127027 0.3260202 0.6250962 1.049901 0.7316258  
1.344582 1.685752 0.891704563 0.8531764 1.396073 0.724989672 1.511098  
0.6632915 0.272046948 1.385254 0.4859042 0.473038522 0.8383696  
0.553013 0.272310087 1.438679 0.668617 0.3303018 1.905731287 1.178888  
1.050322 0.14074859 0.09600073 1.668164606 0.6786263 0.1884156  
0.483898111 0.4329531 2.76006238 0.6375236 3.713143 0.09888806  
0.3531681 0.3405554 0.497037778 0.4210434 0.08745874 2.127301  
2.262342 0.6088063 0.05031801 1.852297 1.318052 1.650137993 0.036236126  
1.386722 0.3416709 1.186171 0.4531371 1.439978841 0.5337193 1.440133106  
1.157855 0.437019 0.193843629 1.081934381 0.3478341 0.1321015 0.850106334  
0.3382082 0.4703628 1.092226 1.216846 0.5552093 1.752698 0.7787105  
0.06649071 0.05534746 1.80355 2.856753 0.1007921 0.223889 1.214149603  
1.945334 0.2751224 0.176815871 0.1373495 0.5523705 0.7660732  
0.7027954 0.2900895 1.276366384 1.078226 0.442928 0.7134608 0.01987343  
0.8912329 0.171448201 0.03839444 0.6460306 0.2964025 1.054345419  
0.228196751 1.684094 0.3766695 0.4605741 1.038783156 1.181712 0.6949954  
0.535215746 0.8334187 0.8359274 0.0595429 1.684569 0.3260804  
0.5705974 2.197334605 0.5072304 0.18820002 0.3677507 3.047662  
0.9461947 0.1610446 0.5009567 0.5307484 0.5145395 1.176709945  
1.784236 1.125389 0.041504312 1.002587 0.1026541 0.9843025 0.831197  
0.3621581 0.09555193 0.3597687 2.165998 1.278124804 0.1180877  
0.420565224 1.63537 1.484644 0.5589106 1.51616107 0.495919358 2.333461  
0.4979066 1.929846 0 0.5119746 0.100009344 0.2207103 4.353047  
0.1882151 0.421795514 0.107171 0.06456299 0.185052603 0.1195301  
0.342952816 0.08824632 2.182541 1.104482692 0.8615606 0.9168006  
2.96621995 1.270209122 0.1115857 0.143877 1.366076 1.279206 1.240904  
1.230503 1.281228 1.18264 0.2291248 0.922797926 0.08375528 0.114302255  
0.5911014 0.258018159 1.563698 0.09349792 0.427519546 0.8051959

0.232195 0.1139285 0.167585446 0.2207811 0.2133315 0.136821574  
1.612755022 0.3903882 0.2822219 0.5639714 0.730707774 1.622494418  
2.068284323 0.09635999 0.1622559 0.04727985 0.134534 0.2206963  
0.3829525 0.1524781 0.1021047 1.569175 0.179192 0.2474905 0.640778237  
0.5444217 0.3717703 1.353149 0.3245831 4.947186 1.068502 0.4707927  
0.3027653 1.353829 0.397186 2.390536498 1.927085 0.4273207 1.305761  
0.2452155 1.373804943 0.0223562 2.600786 1.684025 0.2480741 1.836665  
0.06013448 0.4351596 1.041695153 0.1499633 0.1815088 0.173110494  
0.2846809 1.350337 1.571809 0.2200869 0.7818175 0.459241852 0.471310764  
1.346054 2.334045 1.360955 0.060670703 1.399300966 0.56750142 0.34229  
0.3833627 0.860543 0.1317338 1.058963 0.2014967 0.1263143 2.274677642  
0.934893854 0.1611164 0.978907928 5.075863 0.370679328 1.292993 1.659059  
0.3379982 2.086103 1.384896 0.5024221 1.478852 0.08294406 0.520925  
1.127156977 1.988318 0.08689491 0.3442593 0.5811841 1.452023756  
0.533827 0.5602264 1.236683 0.465181804 0.4154673 0.3159243 0.1910333  
0.09949542 2.173992 0.3667707 0.1458025 1.537942513 1.324657389  
2.154541936 0.2166942 0.49100118 0.140813627 1.36222 0.2348107  
1.244162999 0.9254419 0.258476 0.1589308 1.104164494 0.1676356  
0.06102339 0.1059968 0.133501137 0.1715595 0.5232882 0.1045002  
0.7626097 0.3620452 1.953174 0.3168915 0.1689058 1.186771 1.598936  
0.9555007 0.185550101 0.7391465 1.103891 0.6415953 0.8232438  
0.3079556 0.2407984 0.1107217 0.033768927 0.180701673 0.241419724  
0.1329011 0.9829138 0.2057247 0.5780416 1.695929 1.496222868  
0.5464887 1.251575 0.1884929 0.2335427 0.1669276 0.130359431  
0.8227944 1.589769 0.8198526 1.033955 0.7139633 2.913032 0.8821677  
1.658204363 0.4198426 1.002598 0.217565883 0.2468963 1.131151 1.131078  
1.288639 0.780068 1.590940143 2.014635391 0.223060264 0.06322182 1.650373  
0.4134892 0.2686283 1.321521 0.2540302 0.940792366 0.3083273  
0.020747462 0.05183196 1.08152 0.7056663 1.033054 0.1638298 1.565502239  
0.4072543 0.3169279 0.7569425 0.693812 0.09433831 1.078842 1.009828  
1.169093519 1.416187 0.367897312 0.0957814 0.06179726 1.089376437  
2.659599 0.8462889 0.3263862 1.460204196 0.1658843 1.449487 2.082938  
0.488077018 0.336996 0.1892508 0.03727619 0.2336831 0.7614832  
0.9530661 0.4446948  
LINC02062 0.5291547 0.364962875 0.3075162 1.093507222 0.705779222  
0.426455558 0.4677691 0.305732514 0.4675548 0.197702 0.431137171  
0.6008038 0.6225733 0.5669346 0.790363 0.8768275 0.4056533  
0.464405749 0.2634932 0.3686264 0.418037153 0.4986916 1.991609431  
1.471796 0.6379716 0.255532021 0.5649945 0.9044577 1.029988 0.307333  
0.4985386 0.557555851 0.6040187 0.984040158 0.6034142 1.178168712  
1.704631946 0.288274765 0.6159018 1.032497 0.614284602 1.71286 0.342939385  
1.340822 0.571826873 1.782144 2.734622 5.219494 0.369786294 0.3980773  
1.236696 4.566221 1.502650271 1.163608 0.822982672 0.7964607 1.105478  
2.062516 0.5149287 0.898002 0.1544381 1.082142 1.587070307 0.3864656

0.6758618 0.8309016 0.295733 1.07996 1.024487 0.2456055 0.8512416  
0.605695801 0.2001566 0.3202929 1.072950538 0.7738306 0.366655066  
1.364024 0.9855462 1.231977 0.410811 0.2630028 0.9377984 0.33166705  
1.933735713 0.5135653 0.1157629 0.8104476 0.634104397 0.4760651  
0.5730434 0.9617182 2.343810349 0.6128526 0.9356696 0.8689836  
2.325559 1.375135627 0.342510861 0.930022 0.291086227 0.3377391 0.9033581  
0.895405059 2.328093 0.7148291 0.259574404 1.029995 1.848545597 0.388678804  
0.3146156 1.548935754 0.8858498 1.728511 2.121527 0.3776862 0.5625413  
1.207000538 5.736493 1.038293 0.1739334 0.652581 0.3499623 0.5847634  
0.9701836 1.11027 0.4804596 1.370967 1.777058 1.337989528 0.697965243  
0.4841811 2.684683855 1.879481887 0.5437447 0.592226199 0.6950093  
0.1858262 0.226624891 2.090557076 0.336113529 0.851681973 0.8565191  
0.5440168 0.629611 2.005696 1.337103 0.7266288 1.060416477 0.565867  
0.6976716 1.169119451 3.168394 0.4293355 0.559346738 1.390075 0.3591362  
0.578927898 0.3830542 2.854277 0.444355371 0.9344508 1.876604 0.522402  
0.498512863 1.104899 0.9597926 0.353697083 0.438631 0.381095345 0.9453259  
0.3443513 0.294793159 0.618181 2.38018957 1.355991 1.850263 0.355004  
0.3413465 0.9133105 0.879090706 0.412235 0.1998011 2.098575 1.17875  
0.2980349 0.1724287 1.502814 0.6376476 0.706832122 0.041391056  
2.463994 0.2973537 1.990031 0.3450668 0.751181925 1.024205 0.979468982  
0.6443294 1.109309 0.287845623 0.711549846 0.1891985 0.3017884  
1.514825462 0.2846579 1.041991 1.054314 1.389954 0.9059901 1.144021  
0.4743943 0.3037986 0.1517308 0.9200545 2.822186 0.5921009  
0.06819715 1.052111169 1.07473 0.9951603 0.605908781 0.3486416  
0.4359294 0.8547042 1.183036 0.8932245 1.209024673 1.455544 0.7805912  
1.243882 0.9080246 0.5462542 0.356069676 1.403405 1.424977 0.2770107  
0.976488633 0.521319775 0.9864987 0.1721017 0.455949 0.828708459  
0.809893 0.4927439 1.090525536 3.693684 1.869907 0.238047 1.154529 0.3724684  
0.4779648 0.87467123 0.3983297 0.573261987 0.5085017 3.437706  
1.550713 0.3679094 1.487779 0.5675554 0.5224334 0.64989838 1.849351  
1.788502 0.600510086 1.114263 0.3908586 0.7979107 0.2953821 0.8667549  
0.8731608 0.6262083 1.440634 1.975226592 0.7322425 0.278938792  
0.758036 0.7570752 0.3004334 0.692739702 0.435745043 0.1087926  
1.224975 1.290371 1.362716 0.3898719 0.228473228 0.4285844 2.301234  
0.2976792 0.659305121 0.2448342 0.2581169 0.53549113 0.2048015  
0.276523118 0.3456006 1.920305 0.801019525 0.7498101 0.4833342 0  
0.453408853 0.1911898 1.254997 1.474676 0.8855665 0.8745873 2.091986  
1.100548 0.9517574 0.4362 2.035454435 0.2296086 0.19584424 0.953211  
0.416080477 0.8660118 0.4627951 0.427295948 2.394802 0.424363 0.2602718  
0.212695615 0.3491851 0.1044343 0.406342902 0.669885312 0.4294089  
1.26145 0.5702769 1.289925744 1.08690333 1.93296865 0.7154427  
0.2059314 0.05400586 0.3546293 0.6593186 0.643281 0.3870434  
0.566489 1.618946 0.4093675 0.2678195 0.216869622 0.5088033 0.2378085  
0.6230515 0.5055792 2.847733 1.525633 0.5694008 0.3772762 0.9920454

0.7183417 1.616810222 2.152315 0.3596608 0.7457589 0.3585277  
1.726165792 1.634341 2.931162 2.073661 0.2518799 1.883197 0.2747567  
0.3879533 0.909912897 0.1581203 0.4699483 0.621459431 0.173429  
1.083874 1.158332 0.1885473 0.5598151 1.258975988 0.978834831 0.7434272  
1.288608 0.8731113 0.277206728 2.437506171 0.672242501 0.4759805 0.80843  
0.9127517 1.128556 1.166411 0.1770473 0.7214186 2.541375485 1.008564012  
0.3680735 2.408359254 2.606831 0.846823905 1.233894 1.415599 0.5345745  
1.99009 0.855087 0.4919112 1.161347 0.52109 0.2644585 0.897352436  
1.494194 0.2382157 0.4915418 0.4711286 1.298025239 0.283107 0.7770504  
0.6537713 0.61991801 0.4449107 0.6315181 0.2424551 0.3409488  
0.5244158 0.226458 0.2855044 2.438753636 1.344979887 2.074999408  
0.330028 0.37390048 0.536152305 1.111434 0.2438316 0.529450609 0.5023816  
0.1687124 0.4235937 1.220557053 0.287225 0.1858788 0.345931 0.217847044  
0.4790266 0.3415605 0.5669903 0.6335259 0.2481297 1.025762  
0.405409 0.1102482 0.6961189 0.6581622 0.7795926 0.141297566  
0.5813193 0.9516453 0.4996829 0.7522864 0.2251297 0.4922023  
0.1686306 0.411443992 0.381061268 0.735370541 0.371085 1.029181 0.3524865  
1.200497 0.6249003 0.935921836 0.6809802 2.859248 0.2870771 0.5335327  
0.5402447 0.148904287 1.515879 1.078769 0.455587 1.437794 1.727007 2.005181  
3.806732 0.731811188 0.4156266 0.8083952 0.42602859 0.2350164  
0.7313594 0.8437449 1.962613 0.6480291 1.101373549 1.494820123  
0.56054391 0.6499415 1.054632 0.7287099 0.2510536 1.058624 0.5223032  
0.527887899 0.5560891 0.37918374 0.07894073 1.174621 0.6099868  
0.9281022 0.106935 0.723799153 0.6202534 0.7964304 0.6844945  
1.520332 1.580463 1.063176 0.7497653 2.240039357 0.8253333 0.210117084  
0.3751104 0.376472 0.731970877 2.743957 1.894696 0.7456355 0.792951274  
0.6767245 1.773953 0.9588045 0.863242171 0.7390788 0.1572171  
0.2554744 0.4003901 0.2767582 1.356866 0.1647428  
CH17-340M24.3 5.974449 3.500714134 4.26066 3.985778966 11.395855952 3.840572229  
5.694821 4.724709152 3.737311 6.668839 6.415258996 3.457736 2.037963 5.551313  
10.95054 10.22312 5.30593 5.912908079 5.186476 2.062582 4.065492867 4.942884  
11.912217728 5.522124 7.758534 7.639125481 4.245206 3.40217 12.03724 7.646192  
4.4404 4.954821042 6.013191 7.113364018 3.751438 4.360697589 6.118689615  
5.806760039 3.801723 5.584579 4.075439345 3.0619 6.112923213 9.958444  
4.839660057 1.954578 9.755452 40.89837 2.955816862 3.959767 4.482868 6.894297  
5.215368197 6.510754 6.421728944 7.215206 7.256581 5.837783 3.025249 9.889702  
6.213507 3.790691 9.429886972 5.938014 5.105243 4.283867 3.717748 5.20161  
4.279437 2.519441 3.869911 3.053878647 6.586314 4.000314 9.3360538 3.522281  
11.723151943 4.309307 3.126493 7.743777 2.955366 2.817033 2.481472 4.56581415  
6.97544456 12.8284 6.870567 8.870095 6.082312411 3.069638 4.557612 6.918582  
4.201138121 2.821664 4.312947 10.205359493 2.89161 10.75634635 5.968394946  
4.629326 5.96227829 6.681643 5.907946 7.267362698 4.678139 3.638821 3.596422184  
4.549857 2.852111612 6.643837692 6.463089 6.352055567 3.805969 6.189804  
5.609193 4.796798 3.226949 3.747850011 7.628736 4.574319 6.882005 4.545618

4.335904 4.496131 8.605525 7.946919 10.05298 4.616587 8.996234 6.372417515  
3.566609061 4.721656 9.449715414 2.809910397 4.611929 3.131622664 5.308517  
4.545222 1.720909078 12.760724799 6.489317177 4.37267592 5.179468 6.223784  
5.75163 5.840283 7.019337 3.020248 6.602543853 3.769293 5.072147 3.932744485  
11.41558 3.351064 3.402952476 7.967041 3.470922 5.182856848 4.417843 17.76588  
5.280447765 6.130023 9.000166 4.894874 4.569201068 5.078286 8.350591 6.14275801  
6.116221 1.793881359 8.009661 7.328549 6.0971162 6.744892 4.672953294  
8.671085 6.575741 4.849814 3.050947 7.841144 7.788087033 2.883232 7.551872  
5.532664 4.493623 10.44235 2.457925 3.47729 3.907635 4.250898961 8.932992807  
8.909854 3.921787 5.855107 5.033763 4.327331143 4.405273 5.299766304 4.825042  
3.812832 8.389215143 4.580046332 4.748692 4.281812 4.501867454 10.7592  
6.168632 7.556623 3.311316 6.02109 3.657805 6.635967 4.735295 2.324593 4.028867  
2.996066 9.597161 2.889142 3.567815924 3.482695 5.568238 4.746352996 9.753802  
6.272134 3.936485 4.795734 3.823259 8.328189139 6.950938 6.031524 7.234198  
35.27448 12.14647 7.086977426 10.58685 10.3733 9.570404 5.203584911 2.333559822  
4.435532 4.058205 3.560438 3.131404297 4.007545 7.395919 4.094306119 4.261306  
5.438071 4.267672 6.862223 4.384686 4.723554 2.948597227 4.139165 3.627623583  
4.347368 6.852271 3.868845 4.668543 9.193645 5.443976 6.646756 2.762710305  
4.133049 4.199465 6.619035476 2.746216 5.248747 3.768788 4.43546 8.030462  
5.723145 3.159708 3.679932 6.384086296 5.267738 3.914264836 6.535299 4.865436  
3.452095 4.18064935 5.572873057 2.174032 7.378675 3.323509 122.0751 5.505582  
6.209275765 4.534158 1.642364 3.516287 4.702489113 3.180184 3.330608 7.00625246  
3.847049 4.346992732 5.801236 4.685666 4.321888793 4.570017 4.078076 49.52297658  
4.82023652 5.297896 6.066718 3.316961 2.158976 7.472975 5.904919 4.810287  
17.37499 6.450362 6.014096826 4.924811 3.939700538 13.36554 5.986549198  
2.163219 5.378163 12.027472447 4.383331 6.586261 6.69206 10.676893082 3.132285  
5.008653 8.020123765 4.372924685 10.05957 5.848235 3.140231 9.704261351  
4.14348689 7.073041883 4.355053 5.168672 1.338225 2.645685 5.394142 2.468134  
8.32221 6.579096 3.512486 4.864673 5.137835 3.553687998 5.58086 6.19143  
3.830957 3.637126 1.707211 3.739757 3.978258 4.724575 4.687868 6.588107 5.944886817  
3.714527 6.571156 4.339668 3.510633 7.149758766 20.69796 9.435199 4.056616  
4.706217 4.674346 3.651209 4.380206 4.252034437 11.0381 3.248218 5.328792602  
5.926313 3.598784 3.086302 2.938878 4.815712 5.61872422 4.459754817 3.484433  
2.486265 5.361953 4.062299266 3.385699947 8.482364223 8.370253 4.496498  
5.135197 5.412539 4.074707 4.302191 5.074541 5.093660882 13.894690544 8.237953  
3.815776556 3.017803 10.540186118 3.825608 5.730664 1.780425 5.567593 4.767396  
5.373732 4.444592 7.686751 7.680499 5.831812188 6.783942 1.396363 7.989062 4.10823  
8.723121923 5.378887 12.38588 3.340777 6.677718499 6.164271 13.07652 6.007858  
3.149246 3.476743 4.398662 16.27916 9.713817979 5.832332097 7.213031699  
5.513454 3.825539627 3.799927161 2.736285 0.9745109 6.125354916 4.450726  
6.158473 5.1998 4.552936344 4.183602 5.385977 3.345812 8.288679289 10.44275  
8.62743 3.95965 3.924576 4.495657 5.98544 4.444197 3.50296 11.45073 5.339809  
2.658785 3.924787996 9.16057 6.884151 3.381689 4.269414 6.343349 5.878346  
5.796041 5.549849661 3.858192236 3.497437048 6.633496 3.77674 3.240164

7.820698 3.076934 5.171726869 3.961503 5.864075 4.015719 3.080056 6.858547  
3.888111711 7.342835 10.6637 4.713911 5.17173 11.83609 7.363605 7.589199  
3.75062232 4.267791 4.630924 4.625639854 3.606833 3.312724 3.456462 9.073471  
8.313736 4.577883101 3.67889941 13.767667416 14.28676 4.446825 5.307044  
4.370254 7.396337 7.422101 3.677055745 3.496728 13.373994391 4.069936 8.612078  
7.035103 3.709305 6.538947 2.790677905 6.593978 5.006082 5.298597 2.921767  
6.029448 6.644123 5.670402 3.948355111 4.855499 3.694968655 7.246071 11.69849  
2.504172741 7.519989 6.799748 4.887279 9.529315483 4.046134 5.545862 4.399717  
5.980141418 4.036919 4.461232 10.55078 6.00083 5.68855 4.262674 5.574623  
AP001189.3 1.092753 7.80107367 9.709199 6.583887723 3.212975888 7.348049809  
2.906215 6.584911659 5.296697 3.832321 1.022747235 1.367544 5.616139 6.660392  
0.5319673 4.706509 1.083102 2.216449559 2.950436 3.545722 2.967143375  
10.83854 1.008516667 5.60186 0.6357317 6.716998692 10.86907 1.406335  
0.6780388 1.833494 2.327061 4.744086409 3.709304 2.575999335 9.279644  
6.75135602 7.722348807 3.175007775 4.522289 4.851945 4.871248583 7.385988  
3.802254829 0.2666369 8.446730809 3.925644 2.454112 0.107956 5.724492528  
4.449307 7.158816 0.3259638 4.906908166 2.377418 3.366698043 3.313897  
0.7133143 5.114246 5.82257 2.967131 0.8693764 2.03316 1.514908585  
5.895992 4.218167 3.904599 2.605721 2.480561 7.667944 0.8115167 9.453555  
8.227600561 5.878641 3.821621 2.611058215 6.534173 0.480746987 1.120772  
4.929813 0.08223504 8.833744 5.214001 5.793596 2.949396937 1.674700888  
2.293951 3.081232 0.3890876 2.671041094 6.71142 0.652178 3.530732 3.520134102  
3.599921 7.16791 0.466271361 0.4110777 0.937578756 5.054955226 3.228128  
6.118064618 3.006838 1.175842 0.606882124 3.798698 1.878471 3.525985344  
4.517774 4.640085196 6.915203538 5.012876 2.398248686 9.404273 0.4822838  
0.07988419 2.310983 8.698321 4.192626116 1.192793 6.453565 1.532538 4.928512  
4.475414 1.942367 3.400955 0.1111665 0.6433045 6.939386 0.434938 3.192882844  
4.960117492 4.858669 1.556244098 9.046790949 4.790967 5.084342044 4.139214  
4.939267 2.107739126 0.418636901 1.006156225 5.219281837 1.58593 2.097097  
2.311475 0.8766024 1.724739 4.268247 2.786626014 3.508588 6.95222 1.609559613  
0.590283 5.859788 4.335199753 5.21193 9.517083 4.22246828 5.50465 0.1717842  
1.261577912 3.052074 1.666304 4.816013 2.293822835 2.028194 3.198401 6.303720703  
1.216697 9.855923071 0.08329323 2.30718 2.002193475 2.087951 6.898681872  
5.236345 13.66925 2.867298 3.326615 1.415717 3.281173427 6.255502 4.191571  
8.136977 5.159728 0.4011949 3.967007 6.388386 5.566329 10.083331702 2.492110345  
2.412266 2.565418 1.616636 1.07681 8.368482572 0.931082 5.77188043 7.669234  
2.362095 4.568456623 11.521596429 5.973557 0.664769 5.047986255 0.4777406  
1.912717 0.3870677 5.6232 1.14039 7.238848 1.937566 6.283015 0.5013409  
3.084054 2.914037 1.135188 13.31971 4.564878373 3.391108 3.115095 0.889783094  
1.689546 2.729131 6.694089 0.7755807 2.729201 0.887732402 5.809564 3.247867  
2.802968 0.3000247 0.9115679 1.986989124 0.5474304 0.2989419  
2.508556 4.923342689 3.215365837 3.205212 5.854984 2.601005 7.716674874  
7.022745 2.311498 4.294791392 7.073843 3.505502 8.639482 0.2825728 4.674138  
5.8385 4.328083313 9.306041 1.99937226 2.889559 2.907568 3.243338 3.714416

2.857069 1.837402 2.365529 0.216905059 3.491731 2.380205 2.343877913 4.272576  
4.649236 4.074459 9.32609 0.5496347 0.6731788 5.40261 1.931621 4.571660825  
3.961652 12.33424587 2.027584 5.46992 11.2779 1.856563684 3.839375677  
3.914192 1.124305 4.632034 0 7.371333 5.603104126 3.924372 2.836269 2.720012  
6.442228252 17.59506 3.492649 3.890482249 5.413555 6.192673626 2.47415  
9.993639 2.705501893 1.009345 9.877787 0 3.19601005 1.63779 5.704448  
3.374271 4.389064 2.125804 6.264209 3.54181 0.5861177 2.434143 6.378494228  
3.933796 6.111483454 1.778912 2.291318754 3.205862 10.61252 2.151388683  
0.4077438 7.01079 1.847357 4.591480834 6.18187 5.035411 3.832769523  
5.533499636 0.5093237 1.811287 3.799575 3.760680774 6.670998152 2.523185567  
3.111495 4.959563 0.4361948 5.329282 7.062281 5.819134 2.102995 3.449916  
3.438795 3.18615 7.035622 6.966645105 4.649137 1.471731 7.777137 7.919446 2.80973  
0.3734012 6.193857 11.14993 2.013851 2.66499 2.136871759 1.328929 3.621706  
9.243103 7.222942 2.448474938 0.03750073 0.4362609 2.98509 5.640795  
5.603763 5.371367 6.676327 2.107110121 4.237673 11.00138 5.330526829 3.915739  
3.305795 11.56695 1.453639 3.993029 4.17910085 1.221814414 3.895492 9.200654  
0.7818126 6.784680801 2.171173435 0.458340454 1.522783 3.512097 12.579  
2.347836 3.330611 2.573958 3.337143 3.759886283 1.001911335 9.999613 6.031335944  
2.838117 0.62178468 1.976711 5.867641 10.03091 3.191641 3.296222 3.904273  
2.170572 3.895695 0.2589066 3.78142986 1.711507 0.9911626 2.33393  
1.352266 3.49463221 5.852416 0.5369912 16.30404 2.622691674 5.139733  
0.7728255 2.741567 3.310095 3.284292 3.275675 0.5939604 2.883277425  
1.283825656 2.125923732 3.610638 9.251940511 5.43268059 3.394877 1.39647  
6.035882478 0.9836699 9.435368 4.643171 2.270373612 2.015232 0.8530151  
8.02645 1.791499129 0.7034553 1.454597 7.406032 2.529359 3.70454 0.3765854  
6.463769 7.366474 2.044515 1.860547 10.24631 3.216201742 0.6504177 0.1048126  
9.245746 2.485665 1.962968 4.039199 4.457442 3.549731458 5.152912215 8.018249936  
9.635565 3.469263 9.015387 0.8373976 6.111698 6.304361484 6.472392 3.839723  
5.357523 3.525741 0.9100246 6.468911527 0.6678248 0.897704 1.951349  
1.960599 0.8923412 5.398485 0.7563244 4.77280816 5.680967 16.58693  
6.230204586 3.382214 5.942848 7.995731 4.050543 0.8564734 4.366920746  
3.581574029 1.159913372 0.3446609 9.466658 4.161569 1.966265 2.475844  
2.982807 6.229355223 14.15479 1.39208777 3.043038 2.676634 1.087723 2.297506  
0.6870283 6.62753329 2.82363 5.635182 2.803943 5.106529 0.3956123  
2.590313 6.225099 5.292753594 6.496374 4.898374694 1.23942 0.5874062  
3.031236447 3.079711 1.987414 4.014902 5.521131679 3.975107 3.386589 4.197968  
3.248429353 3.120366 4.848372 0.6044354 1.249451 3.048166 3.174213 0.4435317  
AC129507.4 0.07318749 0.314085849 0.1512271 0.290386918 0.676807421  
0.188746071 0.119441 0 0 0 0.09971673 5.01888 0.1960321 0  
0.06690989 0.1632174 0.073408052 0.03644379 0.244727 0.077091728  
0.3310758 0.379944647 0.2326451 0.0504217 0.678579477 0.06251559  
0.1177371 0.1178962 0 0.0394017 0.072579438 0.09113667 0.047340096  
0.07418518 0.141698028 0.10676285 0.191382413 0.2271613 0.1523252  
0.067969454 0.1722953 0.037945608 0.5872563 0.111655737 0.8713086

0.336201 0 0.068193614 0 0.06364565 0.07017276 0.087508142 0  
0.043362623 0.09791878 0 0.1870603 0.05697591 0.3312075 0  
0.316951 0.117070927 0 0.07478285 0.09193772 0 0.06127981 0.1462679  
0.04529298 0.0588677 0.206212673 0.07382321 0 0 0 0.02897836  
0.2515445 0.1022333 50.18907 0.1298728 0 0.1073438 0.081551878 0  
0 0.06404476 0.344902 0.184638098 0.1053514 0.0317031 0.03129775 0  
0.05424881 0.06902008 0.036981318 0.04765164 0.217366015 0 0  
0.16104076 0.09342552 0.09086809 0 0.107333 0.08325738 0.047869045  
0.05998268 0.095134022 0.066163984 0.03481164 0.260806111 0.08168137  
0.03825131 0 0.1393009 0.03661421 0 0.112342 0.2938923 0.06415137  
2.544433 0.0322689 0.1232438 0.1385149 22.67128 0.3127174 0.1291021  
0.187265 0 0.386142808 0 0.364804751 0.154045326 0.06684927 0.151220151  
0.0854461 0.7402078 0 0.052571879 0.08582386 0.036245013 1.730624 0  
0.3980874 0 0.07997187 0.3618006 0.09263141 0.03478452 0.1102801  
0 0.1046498 0.1676653 0.137534846 0.2945283 0 0.042704867  
0.1816468 0.1553216 0.065556132 0.2139212 0.289734 0.06422535  
0.036773017 0.0382047 0.1225376 0.142312463 0 0.234263857 0.04183942  
0 0 0.1026009 0.138612404 0.1667087 0.2834698 0.07141915  
0.03433578 0 0.040529066 0.03801086 0.06316465 0.5295869 0.3009841  
1.758774 0.03179819 0.08751766 0.07839391 0.037242698 41.859771471  
0.2596536 0 7.964438 0.0954525 0.143304981 0.05396496 0.166732968  
0.1125693 0.1841145 0 0.082875445 0 0 0.128932794 0.1349866  
0.03602948 0 0.2412484 0.114567 0.1861526 0.09842035 0 0.02798122  
0.04426188 0.6342978 0.03639715 0 0.141108064 0.1285588 0.05795402  
0.089390246 0 0.2030938 0.1801361 0.09350056 0.03188182 0.196729913  
0.08259142 0 0.1423792 28.83525 0 0.03939845 0.3396841 0.0563111  
0 0.108046659 0 0.1364428 0.60302 0.1940381 0.041679571 0.2560376  
0.06057911 0.219390238 0.1264018 0.1760866 0.0376278 0.2947995 0  
0.04807811 0.126235763 0.1602707 0.052858648 0.04892589 0.1444465  
0.155985 0.02544281 0.06331537 0 0.0481719 0.065372775 0.4176067  
0.494736 0 0 0 0.07003604 0 0 0 0.1039588 0.047511992  
0.04264278 0 0.1198218 0.1340303 0.249318 0.038325183 0.24107191  
3.009424 0.3388531 0.2776223 0.7539101 0.2516418 0.101120558  
0.02789533 0.4546915 0.1097922 0.168348209 0.4402199 0.1632009 0  
0.07553636 0.152983854 0.03186673 0.298215 0.265893981 0.1037064  
0.1485556 0 0.250844249 0 0.3306264 0.1897328 0.2449657  
0.1334779 0.1808394 0.1036371 0.2038262 0.09652944 0.120653177  
0.04234295 0 12.21706 0.07673089 2.355639 0.236342 0.135084301 0  
0.03912915 0 0.047068752 0.04292965 0.07703639 0.103756361 0.123535949  
0.1461948 0 0.0233704 0.125936378 0.215858176 0.047528756 0.1217883  
0 0 0 0.04291317 0.05694229 0.04282564 0.03687115 0.0639762  
0.09059152 0 0.11998111 0.0625535 0.2255406 0.1856063 0.1491771  
0.7877409 0.2250779 0.07000349 0 0.1614235 0.0836665 0.079509803  
0.2706246 0.2274046 0.1980404 0.07438204 0.13022526 0 0.04382806



0.03019037 0.03483756 0.5483481 0.03800165 0.1341447 0.07744629  
0.05831907 0.03058759 0 0 0.09225277 0.04272242 0.03477068  
0.0884893 0.203150736 0 0.1869519 0.2458311 0.09425185 0.10224137  
0.265284142 0 0 0.03727137 0.3107516 0.1664968 0.4302039  
0.1175398 0.1197355 0.167879696 0.196933659 0.1527249 0.095171604  
1.7903240 0 0 0.06572186 0.1158946 0.09461379 0.1814302  
0.07787933 0.2096641 0.04876973 0.043169733 0.8597152 0 0.1087764  
0.09478092 0.159582321 0.09638542 0.303456 0.07750562 0.065326457  
0.06563807 0.1330977 0.1609632 7.293567 0.1706636 0 0.0526509  
0.045736199 0.148819534 0 0 0.041371396 0.039549506 0.1967651 0  
0.061666031 0.138969 0.06222572 0.03347847 0.135052378 0.03531213 0  
0.03827663 0 0.3372944 0 0.03301917 0.04381154 0 0 0.03204125  
0.09149066 0.1621564 0.1820611 0.172521 0.039085785 3.767426 0 4.93915  
0.2497173 0.1245509 0.06407209 0 0.056906895 0.070272873 0.040683694  
0.03732715 0.05176224 0.1950099 0.0664164 0.1936034 0.180100901  
0.04186066 0.3330216 0.02647046 0.06559378 0 0 0.1341833  
0.4376674 0.1120219 0.1136352 0.3892578 0.3215501 0.1982155  
0.047631502 0.07075125 0.09938603 0 0.02600413 0.1078981 0.1750478  
0.1467294 0.179258 0.162486592 0.043526073 0 11.66618 0.3500792  
0.2090418 0 0.5639823 0.160533 0.083442598 0.04102015 0 0.04367323  
0 18.89829 0.0586816 0.02958039 0.094220042 0.4804092 0.04005616 0  
0.1431676 0.03974438 0.2138881 0.382893 0.031776437 0.1826432  
0.087183998 0.03458773 0 0.291568399 0.6072275 0.08556922 0.2200085  
0.090764059 0.05990265 0.04361881 0.07858514 0.039798395 0.06814809 0  
0 0.03691868 0.1312405 0.1396602 0.0607616  
AC073957.3 0.4280786 0.501942463 0.2175093 2.212062523 0.585733397  
0.45044342 0.3613984 0.506980532 0.06614123 0.08390194 0.236920804  
1.087883 0.520035 4.207977 1.753961 1.045767 0.310398 0.488025591 0.6150254  
0.5631835 0.197121199 0.2516137 0.918074003 1.597641 0.5447155  
0.741035297 0.8591962 0.6660738 0.339139 0.6140975 0.3778085  
0.403643919 1.425389 0.70812602 0.4339142 1.137677074 0.618775866  
1.127564688 0.6486097 0.9737274 0.549629284 1.277606 0.118856559  
0.7626529 0.571000634 1.899586 1.192772 0.1923895 0.165650543 0.2033518  
0.8299739 3.705221 1.767669648 0.6512681 0.324314949 1.201802 0.3127661  
1.04271 0.1238328 0.7092683 0.1674945 0.7271393 2.409741673  
0.5102551 0.3919958 3.38518 0.2757305 1.510106 2.681131 0.2200443  
0.4515687 0.841999481 0.1179773 0.09061853 0.561592282 0.3876978  
0.340845203 2.297113 0.4400359 0.3762819 0.1909464 0.2492728  
0.8554464 0.231984802 1.367750326 0.4358998 0.1658075 0.9436372  
0.611387615 0.3367255 0.1459149 0.1220418 1.208184661 0.6796915  
1.197873 0.387696419 0.1127055 0.305689051 0.210767338 0.2272447  
0.290817021 0.3433989 1.39989 0.092563443 1.54834 0.3672294 0.367199069  
1.039108 1.842655065 0.306637466 0.2069536 1.617167692 0.4438206  
0.7384462 0.3193535 0.2344906 0.3183128 1.057303565 0.9048535

1.342405 0.1086719 0.160453 0.3032264 2.034562 0.7769786 0.5354351  
1.30936 1.116185 2.029046 1.02523761 0.916830005 0.2374431 0.416426173  
0.544059462 0.5298878 1.469328205 0.4915869 0.08674823 0.235097894  
1.045151988 0.501075205 0.843364274 1.340716 0.4954151 2.544743 1.259895  
1.260143 2.757351 0.588191635 0.8516289 2.80338 1.391998344 1.582105  
0.501954 0.547290186 1.765601 0.5218968 0.256608349 0.71218 0.3806045  
0.305915682 1.429011 1.654545 0.5173001 1.217655905 0.8987319 1.268966  
0.122812412 0.1516768 0.826627646 2.219879 0.6119522 0.33361617  
0.4678527 1.408850078 0.5683589 3.720761 0.2647941 0.1536422  
0.1818352 0.751329003 0.3936301 0.2947559 1.151017 1.590522 1.089149  
0.2845745 1.848982 2.179903 1.004660073 0.099539426 0.5975338 0.4837388  
1.452491 0.3722054 0.892248449 0.6623364 1.193727125 0.7963467  
1.090629 0.150347849 0.691356331 0.2114387 0.2694906 0.516494318  
0.2301044 0.2717725 0.4747794 0.8674661 1.144314 2.527488 0.5326757  
0.06088258 0.2718791 1.179863 1.993041 0.1070264 0.2242998 1.29440235  
2.200375 0.6372027 0.448564963 0.0937071 0.7935624 0.5671168  
0.2540205 0.3525776 0.870246038 1.267102 0.1901746 1.295445 0.01284509  
0.7130301 0.1108147 0.03412208 0.1979804 0.1959324 0.902488577  
0.110620384 2.061882 0.2434585 1.156029 0.572831986 1.262987 0.4530794  
0.500201952 0.7999339 0.7766777 0.04810657 1.591342 0.2179455  
0.4948104 1.522450378 0.2971103 0.152052695 0.3581045 2.994775  
0.691338 0.2732373 0.4533073 0.3777162 0.3541255 0.206855788  
1.390819 1.170148 0.04247467 0.6720988 0.09030966 0.813206 0.6984121  
0.1532661 0.1821906 0.4263137 3.528752 1.053897261 0.1690062  
0.333211287 0.7353138 2.401123 0.3293742 0.886866729 0.314370898  
3.778247 0.7519435 1.189035 0.04130839 0.2734622 0.391075306 0.3102747  
2.790318 0.2292671 0.523727842 0.2164671 0.1877849 0.217287572  
0.02172872 0.824727402 0.1731498 1.058006 1.787525208 0.8132004  
0.7616038 0.20541446 1.016620743 0.1577688 0.1479453 1.896901  
0.7516439 1.139085 1.354834 0.9274893 0.9402908 0.2313964 0.647863642  
0.1434573 0.163918364 0.7023079 0.519926151 1.633436 0.1359718  
0.567761836 0.5719869 0.1250651 0.1963656 0.135397534 0.279913  
0.140348 0.075168858 0.817333432 0.3317613 0.2676708 0.4093382  
0.764786763 2.264936602 1.291251788 0.1557045 0.1427442 0.02291933  
0.04849434 0.2551168 0.3949392 0.1642558 0.1861999 1.030587  
0.4690705 0.305195 0.383485052 0.3898718 0.4084962 0.9322298  
0.2574728 5.709082 0.4891898 0.4310839 0.2268235 2.001862 0.9225847  
2.703945101 1.460076 0.1853425 1.057075 0.2424956 0.524446683 0.0650242  
2.552326 0.9572286 0.1692493 1.161414 0.182192 0.2846933 1.242624462  
0.3877122 0.1779313 0.21578615 0.3342704 2.158371 0.6909425  
0.4356471 0.8843168 0.285697631 0.911580371 1.708958 4.0135 0.9037466  
0.31044583 1.249245712 0.726810868 0.4112131 0.7171457 0.5139955  
0.2394716 0.6325105 0.5384775 0.2245173 1.856563624 1.351201525  
0.1204082 1.049450716 6.256331 0.564740214 2.216244 2.315834 0.3487013

1.370568 0.9344337 0.6527898 1.067862 0.1172729 1.016327 0.963097701  
1.492284 0.1151364 0.4172069 0.493792 4.148479159 0.4590217 1.338475  
0.6903253 0.181653563 0.3734318 0.4934739 0.2229381 0.1018216  
1.165139 0.2050252 0.1245297 1.695717964 1.186768617 1.201439467  
0.1447279 0.354381082 0.15927484 1.808096 0.1828124 1.198354027 1.22296  
0.3440738 0.1091444 1.522306884 0.2573323 0.5949193 0.137021  
0.123268289 0.3603815 0.8093235 0.1245328 0.7617685 0.4475367  
2.071392 0.2580748 0.3255649 2.275276 1.436144 0.7113235 0.10243969  
0.5247349 0.3163608 0.6644497 0.667785 0.3483297 0.1453995  
0.09939504 0.098218707 0.190915943 0.210654606 0.1646416 0.7246408  
0.1101151 0.433053 1.366658 2.089575529 0.3585721 1.343814 0.2707366  
0.2222307 0.2382633 0.086012533 0.6947829 0.9054554 0.7143012  
0.6658704 1.490718 2.633076 1.568008 1.290998355 0.2962382 0.5622561  
0.138111518 0.1645671 0.8863035 0.8280449 1.80838 0.8135843  
1.085423896 1.608210475 0.191030421 0.05107889 1.739932 0.3817953  
0.1933569 0.8569316 0.2914394 0.797433669 0.490348 0.077107614  
0.08375333 0.5128169 1.263531 2.374495 0.04159988 0.984751409 0.3597433  
0.1561941 0.4484755 0.7756216 0.03556881 0.5947596 1.71333  
0.786107103 1.130172 0.514589424 0.4399878 0.04659941 0.596425208  
3.917699 0.3856313 0.4359801 1.848911419 0.1857177 2.250158 1.981769  
0.389244556 0.5205796 0.186262 0.09838089 0.5616797 0.96199 2.816681  
0.8409161  
AC092119.2 0.8057986 1.24803759 0.09858669 0.616999166 1.116245144  
0.45572492 0.4729577 0.228701317 0.02141336 0.01267626 0.244540167  
1.049734 0.3136429 1.7153 1.837024 0.8336138 0.1536936 0.425382673  
0.1689467 0.2718095 0.145186836 0.4156766 1.629251574 0.8666513  
1.037246 0.622600083 0.4618858 0.1193954 0.1480225 1.133071 0.9018787  
0.136688841 0.8625893 1.673381911 0.3116673 0.788262996 1.257954223  
1.450963647 0.5265389 1.180597 0.90589469 1.687315 0.065965805 1.262697  
0.269591318 1.009806 1.996912 0.7306039 0.118549865 0.04253989 0.5163365  
3.212416 0.760634152 0.5838906 0.138202002 1.900846 0.1718329 1.159849  
0.01650811 0.1439453 0.2475567 2.255007 3.527674451 0.2064952  
0.0650024 1.078835 0.1206661 0.5770413 1.144245 0.05249247 0.1705623  
0.75431517 0.09625239 0.05134138 0.491396337 0.2825384 0.344241927  
1.166114 0.1481046 2.387712 0.3010331 0.01686323 0.8190093 0.153586635  
2.050559967 0.1920847 0.09278114 2.528264 0.834549343 0.3255932  
0.1377841 0.1088179 0.182158217 0.7308853 0.9198973 1.296503984  
0.2623237 0.913199677 0.109805628 0.08131525 0.023329848 0.05413793  
0.5923795 0.110406959 1.544558 0.3015358 0.083217012 0.5561372  
1.984606718 0.335479358 0.09077642 2.22378628 0.1656636 1.983835 1.06381  
0.02690722 0.3076478 0.803670688 1.171793 1.122457 0.08364203 0.1394741  
0.06544679 0.7052421 0.3310979 1.051646 0.9513658 1.019309 2.957053  
2.412823167 1.390513682 0.3104474 0.815384231 0.870340595 0.1162128  
1.256009626 0.5075189 0.02382963 0.024217907 1.766922882 0.215509412

0.493573936 0.9909177 0.2943109 1.057294 0.9491999 1.100619 0.2213026  
0.88568302 0.463607 1.20354 1.171275774 1.68282 0.3076676 0.129509674  
0.5973533 0.05233434 0.160852133 0.8245374 0.9900577 0.541332727  
0.8987273 1.007365 0.06512993 0.969564611 0.7637865 1.40832 0  
0.06249813 0.420826502 1.212249 0.08279673 0.177202125 0.07927311  
1.753711867 1.030441 2.810743 0.1345037 0.4377294 0.1626658 1.068597349  
0.1321585 0.164711 1.038682 1.090083 0.7325275 0.02763947 1.090361 0.76091  
0.41004435 0.066347836 1.504633 0.2144896 1.140228 0.3457032 0.581293444  
1.938829 0.515295449 0.5762096 1.778168 0.099378987 0.16808541 0.2183586  
0.4111893 0.398472377 0.5605882 0.5219562 0.6534721 1.223231  
0.5228128 0.6903752 0.9980655 0.04869742 0.1135013 0.6027453  
2.855666 0.1792761 0.13118 0.746140828 0.8846498 0.100749 0.129498948  
0.4582614 0.5590187 0.9655583 0.7449944 0.2309347 2.371209001  
2.404956 0.2780554 0.8938093 0.02911038 0.5890526 0.194059168  
0.3233785 1.044191 0.0592046 0.553059759 0.033426003 0.5455516  
0.1563267 0.4947387 0.591732502 1.236399 0.552891 0.254263133 0.8301319  
0.7142666 0 0.7592422 0.09769887 0.2646715 1.475205862 0.2205738  
0.061260727 0.3331292 3.613197 0.602598 0.2211528 0.4035877 0.1075175  
0.09770076 0.710287693 1.512459 1.361768 0.040530032 0.3175304 0.1002443  
0.6395059 0.4126067 0.8209888 0.2239414 0.1756617 2.078339  
1.142582157 0.0247105 0.059616697 0.8158492 0.757258 0.4213825  
0.855029426 0.251452069 2.859982 0.6732258 1.401917 0.09361574 0.1562364  
0.087895536 0.2101411 2.529439 0.2014697 0.504028442 0.01962286  
0.05910696 0.2800984 0.02188579 0.221626509 0.1015632 1.015251  
0.462238229 1.141813 0.06886765 0.15517448 0.901222317 0.1430183  
0.07663614 0.5167451 0.7381503 1.082863 2.001532 1.651521 3.356365  
0.1678097 0.48941007 0.0613419 0.062785746 1.209628 0.166739158  
0.7056553 0.1141289 0.538162809 0.5785941 0.09069776 0.05562705  
0.368215911 0.0870686 0.08928161 0.04008294 0.680069126 0.3600451  
0.2066977 0.3588791 0.985192428 0.66116261 3.263704993 0.141147  
0.1452431 0.13851 0.06063503 0.03730078 0.1402361 0.2853894  
0.1602448 0.6487728 0.04374641 0.2862011 0.173815693 0.3262347  
0.4792171 0.4993605 0.01080558 2.310918 0.3586755 0.3042405  
0.2217436 0.7483295 0.5696729 1.439815348 0.439098 0.3129673  
0.4877293 0.06465401 1.094206613 0.2619769 4.063575 1.740715 0.1110316  
1.165102 0.04404215 0.06218701 0.347807081 0.2112159 0.1152112  
0.063392575 0.06949955 0.2940209 0.643673 0.1914136 0.27348 0.235442301  
0.428866645 0.7583401 1.538497 1.317629 0.059246508 0.871114123 0.892845218  
0.3596875 0.3023705 0.1012913 0.542706 0.955624 0.0794635 0.1387678  
2.237495186 1.65471823 0.1180008 0.827246136 3.400534 0.368441827  
1.534348 1.668913 0.3713219 1.645377 0.657918 0.3304231 1.760042 0.01518694  
0.1978265 1.525967534 0.6897947 0.140011 0.2941559 0.4119251  
1.356289183 0.2513391 0.3956529 0.6138071 0.520508591 0.3898663  
0.2217403 0.1088202 0.06072491 0.3955825 0.2323207 0.5796896

2.21300626 2.705700819 1.670796398 0.1269645 0.131855716 0.080213083  
0.4418306 0.171974 1.054154123 1.067013 0.153248 0.2522 1.447804966  
0.1432379 0.2085682 0.05545105 0.055871703 0.2652594 0.9088579  
0.12437 0.4062044 0.05303197 2.597909 0.2506567 0.1060334 1.67964  
1.519203 0.3748947 0.079272578 1.020572 0.5186499 0.3951439 0.4823513  
0.1443487 0.09282073 0.1171328 0.032976229 0.122164511 0.141451557  
0.07570576 0.8248631 0.0753358 0.4618412 0.7292264 1.435009189  
0.1940583 1.965966 0.0843646 0.07602016 0.1935733 0.039781047  
0.8067199 1.821439 0.527427 0.6145902 1.978828 3.353955 2.94332 0.262212854  
0.5637323 0.1727757 0.045526865 0.08287835 1.422431 0.4733686  
0.9948076 0.6336429 0.870954285 1.475507611 0.604461898 0.1736374  
0.5409675 0.1211349 0.1609706 1.21927 0.2232604 0.302206591  
0.2020469 0.136757918 0.08857668 0.4674685 0.8101597 0.6885937  
0.04285287 0.477735425 0.417579 0.2553278 0.1847935 0.2696274  
0.6909285 0.7126734 0.4345103 0.626066134 0.4868525 0.218924809  
0.2004279 0.1357799 0.600736501 1.797072 1.028897 0.1434261 0.85906264  
0.1128147 1.213252 1.149841 0.242153614 0.2566866 0.2646118 0.1820058  
0.04278705 0.8745844 1.213948 0.4049143  
AC036214.2 0.8102501 0.274794536 0.5521356 0.501606192 0.735796005  
0.622429792 0.6564699 0.495810489 0.6267085 0.6595528 0.777934784  
0.9082161 0.5563298 0.3324635 0.7553124 0.7407516 0.7689195  
0.570613514 0.4807242 0.9415451 0.980586604 0.7105312 0.608574371  
1.017709 1.258948 0.50615961 0.397591 1.192522 0.4258147 0.5406815  
1.447851 0.410307315 0.5295269 0.557549661 0.611603 0.747646392 0.955626468  
0.555989911 0.6956041 0.6279055 0.336215312 1.00649 0.500534431  
1.062946 0.490944311 0.3888708 0.5279492 1.264569 0.658585222 0.5533433  
0.5247122 0.4628188 0.700828566 1.002123 0.837555923 0.7380748  
0.2968544 0.2643731 0.5502494 1.300269 0.8587003 0.7631709  
0.551522797 0.4252855 0.9336032 0.4980879 0.6586634 0.5773801  
0.4651224 0.5547773 0.6933164 0.740746504 0.4347277 0.7304389  
0.63919035 0.481804 1.05118448 0.7787338 0.4495144 0.9340896  
0.3059163 0.329026 0.6068377 0.172886423 0.697838355 0.4015554  
0.5732599 0.4387063 0.695866158 0.6782932 0.8811871 0.4570768  
0.703429682 0.7667007 0.5852782 0.7143 1.638759 0.204802876 0.553470659  
0.4627521 0.265532855 0.5061483 0.3638687 0.466743313 0.4213727  
0.4510607 0.789291128 0.6216744 0.739493248 0.607813964 0.4755945  
0.491464514 0.7696041 0.4144657 0.4536934 0.6124988 0.9141973  
0.483974715 0.4233958 0.7551986 0.5742142 0.3563661 0.5776732  
0.4935127 0.7178 4.419506 0.8544655 0.684227 0.4852143 0.755567696  
0.272868636 0.3196898 0.34372007 0.326569372 0.8660516 0.831133656  
0.7648218 0.8911553 0.511903697 0.470567051 0.687339619 0.443951999  
1.145301 0.7089422 0.9533259 0.3236068 0.4709358 1.287805 0.669128092  
0.5571593 0.7100259 0.584028501 0.7395103 0.631899 0.404955381  
0.5395939 0.5105594 0.603549695 0.7986911 0.9512386 0.494137387

0.3695215 0.7507176 0.4084648 0.658305173 0.5219503 0.5580339  
0.469305221 0.3429645 0.176579256 0.6307396 0.7628676 0.787534941  
0.7089194 0.740072335 0.07853673 0.5341721 0.5887991 0.8411331  
0.5995041 0.477332513 0.8953486 0.5505037 0.9019992 0.5671762  
0.8026683 0.5542663 0.535986 0.4801093 0.684258421 1.596602438  
0.7339392 0.4650003 0.4855604 0.6520332 0.661609561 0.6609972  
0.6283851 0.5656697 0.2602098 0.738677401 0.663726574 0.4536637  
0.7472308 0.60740422 1.399032 0.9505181 0.5495771 0.6250885  
0.7421243 0.8243495 0.4945703 0.5278652 0.4613697 0.4378885  
0.4597209 0.6001362 0.5687806 0.864190715 0.9236042 0.73716  
0.379006845 0.5270305 0.7654222 0.3818806 0.7928684 0.8861546  
0.537542499 0.9143599 0.5123861 0.8049007 0.8756446 0.9836583  
0.371213316 0.6172419 1.087658 0.7380238 1.340391267 0.652189799  
0.5527943 0.7027331 0.8958341 0.765776896 0.8041311 0.8418976  
0.620130314 0.4565353 0.5599437 0.4963423 0.4629349 0.653066  
0.3623947 0.951517553 0.5096504 0.547839245 0.8758641 0.4536597  
0.9553018 0.5154042 0.5667312 0.9816733 0.8850602 1.262685481  
0.6295523 0.4370078 0.494249821 0.5324239 0.5840573 0.2646782  
0.6048914 1.108986 0.7737518 0.8568538 0.8815522 0.693871975  
0.5825831 0.500825763 1.524102 0.4419932 0.3132108 0.649981723  
0.658702048 9.867497 0.570122 0.6539414 0 0.4741953 0.738389596  
0.7096427 5.226622 0.4482681 0.23792724 0.4945411 0.7688417  
0.763942348 0.4804014 0.504496375 0.8256853 0.5092745 0.626315158  
0.6351309 0.5598782 0 0.63813464 0.3322018 0.9189755 0.8938339  
0.4616148 0.581655 0.5282008 0.4882359 1.040247 0.5229643 0.62523871  
0.4587999 0.850722888 1.428517 0.415702359 0.6018955 0.7237167  
0.572745651 0.4884755 0.4792788 0.8140234 0.842617919 0.8696415  
0.5625253 0.407331405 0.872969408 0.8092527 0.7452231 0.4293833  
0.929484629 0.581091957 0.582162472 0.8893071 1.094917 2.815136 0.5052727  
0.444762 0.5767502 0.5043805 0.6426919 1.597382 0.6970706 0.4653498  
0.480447804 0.6041154 0.8500201 0.7244979 0.9136078 4.499659  
0.795259 0.5276599 0.524429 0.6692122 0.729185 0.730415029 1.351412  
0.2410439 0.6530798 0.3971368 0.470344669 0.3993398 0.4955391  
0.7111363 0.6236569 1.03331 0.6086895 0.6951534 0.638488498  
0.7555404 0.3746563 1.163257214 0.4294117 0.5215249 0.9660764  
0.475035 0.6253115 1.03907851 0.425193611 0.7750451 0.3242719  
0.9657474 0.577992655 0.749854411 0.375446232 0.6734468 0.7550196  
0.6587799 0.6863229 0.2927451 0.6460201 0.7144955 0.850199901  
0.649430082 0.3117787 0.605278948 6.32568 0.882839316 0.5067522  
0.3570495 0.7275991 0.5459812 0.8134516 0.7692483 0.7888149  
0.7161048 0.6433137 0.671131635 0.9658003 1.365908 1.144465 0.7590742  
1.378290057 0.4881286 1.501065 0.3773011 0.61550773 0.4019884  
1.065943 0.8594067 0.5924155 0.6914389 0.6610498 0.5456861  
0.430927763 0.403127287 0.830083961 0.4300801 0.623683941 0.708009485

0.6257 0.8897061 0.566493615 1.287547 0.7328656 0.6150985 0.55140251  
0.3826187 0.968921 0.4327721 0.65862502 0.9079992 0.5341306  
0.5133275 1.754373 0.8838325 0.6683671 0.9207755 0.7470906  
0.7639209 1.252231 0.650199 0.533987694 1.789269 0.5456653 0.6251213  
0.5097827 1.20286 0.3923979 0.7618104 1.179592425 0.695218649  
0.72831355 0.4572067 0.5608611 0.5971513 0.7822215 0.6905659  
0.827246449 0.414133 0.8040455 0.324227 0.7416318 1.109877 0.375156529  
1.453921 0.7872546 0.7520248 0.285513 1.567065 0.4544481 0.9804857  
0.516103162 0.8832719 0.3979777 0.407135283 0.5880279 0.6862177  
0.5360242 0.483871 0.6755897 0.975982711 0.512629871 0.876575754  
1.054019 0.5772298 0.8019076 0.4071369 0.6744511 0.8319006  
0.294824446 0.3478437 0.79062084 0.514363 0.6545154 2.021347 0.4561422  
0.6270913 0.998711898 0.5173062 0.5283744 0.7699434 0.5227099  
0.5804327 0.3778612 0.84178 0.50897743 0.6883477 0.383343382  
0.6680674 0.588725 0.961508004 1.491628 0.362806 0.3886737 0.655639176  
0.747836 0.534271 0.777453 1.031199413 0.5297269 0.4507347 0.2811364  
0.7130902 0.5770574 0.4276619 0.6154348  
AC018926.3 1.012367 1.241313249 0.3218232 0.463474687 0.609357496 0.368194306  
0.3812699 0.479934784 0.3145548 0.6982874 0.819961145 0.6366152  
0.2443268 1.835555 0.9692978 0.4271686 0.2605046 0.468654359  
0.2326658 0.5641982 0.369128865 0.3522777 2.021380389 0.9548107  
0.7511095 0.541526479 0.5986715 0.3131924 1.045385 1.040277 1.215824  
0.540591677 0.8404327 0.906691103 0.5130837 0.542780231 0.416532892  
0.780613981 0.5639867 0.7698802 0.759382861 1.173305 0.282629355  
0.8550768 0.514826454 0.8783116 0.9539497 1.125162 0.290242772  
0.0520747 0.7110755 1.231999 0.325892391 0.1191271 0.27683724  
1.041894 0.7099216 0.6369266 0.1818738 0.8223083 0.1818261  
0.6744966 1.307964839 0.4044457 0.0795719 0.4402141 0.2848731  
1.271481 0.933809 0.3373546 0.8142881 0.767964437 0.6284064 0.1885468  
0.938397557 0.4808381 0.308341171 1.720628 0.3263408 0.5933683  
0.6909488 0.1238575 0.9518168 0.260323235 0.467008044 0.8565747  
0.3066577 0.8807744 0.31433954 0.2241962 1.383067 0.3330204  
0.794390416 1.01015 0.881281 0.314796636 0.3549225 1.040787028 0.403251704  
0.4479349 0.085676857 0.3479295 0.1933745 0 0.8375146 0.3986511  
0.407476405 0.2552957 1.366555703 0.633609782 0.1111229 1.704691877  
0.3476488 0.407009 0.768541 0.3952578 0.5064665 0.983803773 0.7769861  
0.625426 0.5802065 0.8780682 0.3090184 0.9179537 0.3316169  
2.733163 0.4991155 1.167643 2.490716 0.787634229 0.82174233 0.5320427  
0.720880887 0.286843021 0.4267815 0.911790469 0.8637211 0.3062929  
0.222345439 0.447508411 0.487039838 0.462793463 1.183791 0.6004618  
0.9530564 0.730905 1.148759 0.5560679 0.985634708 0.6292057 1.290766  
0.516169117 1.113516 0.3865388 0.658541233 0.7312428 0.461264 0.272637966  
0.450985 0.2203577 0.523157309 0.644925 0.4624326 0.6492139 1.369477866  
0.528467 0.7388475 0.302852138 0.3729684 0.299119171 0.8458571

0.5574504 0.650759529 0.5458568 1.130749465 1.064308 1.843252 0.1139892  
0.5480194 0.1991254 0.819365948 0.7684561 0.1680242 1.170349  
1.281036 0.7602581 0.778194 0.8381001 0.6256066 1.426597132 0.243656709  
1.381409 0.656412 0.5483484 0.5078261 0.5184393 0.8613126 0.857483834  
0.5190385 0.8489219 0.443166641 0.573187807 0.4455018 0.1332403  
0.503028437 0.7181553 0.345031 0.3723858 1.026791 1.005706 0.3961474  
1.745385 0.2384494 0.7741011 0.6593494 0.9864184 0.464736 0.3211649  
0.525505892 1.128531 0.4316575 0.380458978 0.4925636 0.6753119  
0.4312617 1.293348 0.6445467 1.046641904 0.834865 0.9870968 0.6059884  
0.1069054 1.110856 0.167686015 1.135946 0.8388412 0.6885087 0.804761322  
0 0.6678305 0.3377037 0.4542213 0.886974123 0.8627079 0.3545221  
0.583599649 0.5379861 0.3278853 0.1601499 0.5227972 0.4385219  
0.9719831 1.119331891 0.724771 0.224974737 0.7548566 1.895593 1.106495  
0.1895051 0.4042203 0.4252217 0.3075408 0.347796043 0.222175  
0.7896279 0.520950673 0.2186443 0.1227129 0.2989039 0.471967  
0.9276956 0.4626031 0.36863 1.253651 1.061647276 0.5444832 0.43787436  
0.5737281 0.6774145 0.3094982 0.978708111 0.307812016 13.5771  
1.184674 0.8862033 0 0.6502666 0.268990648 0.3264991 10.06324  
0.4672927 0.417967968 0.396348 0.2170652 0.464545844 0.04018683  
0.271301417 0.1356298 0.8329454 0.612996962 1.029912 0.505821 0  
1.174395934 0.1500636 0.2814396 0.5248963 0.6255677 1.100699  
1.193005 0.5513699 0.5783442 0.2054222 0.984244637 0.4054911  
0.653296507 0.6546478 0.612335184 0.8496585 0.29339 0.646807589  
0.6129338 0.8326992 0.5617853 0.400664056 0.2740731 0.3688639  
0.220801713 0.657235589 0.5833388 0.3960415 0.4724735 1.116677241  
0.95153808 0.859731979 0.1295876 0.2909416 2.034664 0.36185 0.2283065  
0.6664772 0.5923861 0.9808089 0.9530248 0.1927859 0.3153146  
0.446826203 0.2995172 0.5199656 0.4796245 0.4761908 11.31553  
1.915934 0.5214053 0.777319 0.4809307 0.8902445 0.930617203 1.036639  
0.423443 0.526807 0.3165817 0.923765392 1.142479 1.0726 1.02796 0.2965483  
1.322518 0.2830468 0.4282058 0.288420666 0.2482152 0.2929176  
0.665153623 0.918832 0.5889635 0.81825 0.295979 0.5335512 0.185280333  
1.805460042 0.994621 1.30787 0.8775172 0.271972118 0.893863807 2.261308341  
0.4002792 0.5155567 0.413315 0.2657388 1.424123 0.08337796 0.4246775  
1.518360208 1.117574263 0.4875161 0.253165843 10.05403 0.356071276  
0.6163021 1.612879 0.7692372 1.171506 0.8305506 0.6067251 0.8286668  
0.3904091 0.4151433 1.286160313 0.7740368 1.0751 0.3086463  
0.5546785 1.245213776 0.3589526 2.367854 0.7147316 0.347549623  
0.4539697 0.3894584 0.3996328 0.3122098 0.9442827 0.8531776  
0.2240905 0.437986062 0.277112235 1.363523497 0.1165665 0.440207954  
0.420822335 0.6804388 1.665021 1.017033851 0.8132767 0.6290008  
1.211162 1.245409118 0.225441 0.4923956 0.3258227 0.30777602 0.717789  
0.8444789 0.3162033 0.6060237 0.3408219 1.20767 0.3409316  
0.1297996 0.5607574 1.511017 1.101415 0.457476972 0.7495924 0.448164



0.4706373 0.7971271 0.6957672 0.5113142 0.3308925 0.635787375  
0.336478977 0.909070134 0.4368931 0.5507707 0.2074982 0.424018  
0.7357201 0.95817228 0.1336242 0.4872286 0.3379873 0.4187662  
0.8979553 0.584369861 0.4997172 0.4656954 0.5065818 0.6851697  
0.790718 1.436996 0.7381817 0.658863332 0.5646159 0.4758779 0.125395115  
0.3043636 0.3444235 0.5587732 0.5308279 0.4959178 0.907683718  
1.343090261 0.359973115 0.2975786 1.179577 0.7943882 0.4926256  
1.107876 0.4099523 0.488324168 0.4801176 0.781249257 0.04647003  
0.5722459 1.385026 0.4995162 0.2517976 0.852157623 1.533523 0.6819413  
0.5513934 0.7616796 0.2114479 0.3982744 0.7808753 0.811473143  
0.7384903 0.463836051 0.1840135 0.49864 0.758365098 1.153775 0.2731471  
0.2340977 0.257537428 0.3824327 0.6033577 0.7107504 0.508164726  
0.9064031 0.2776469 0.1671001 0.3142635 0.6982252 1.077379  
0.9051383  
AL513218.1 0.1617238 0.94191328 0.08354235 0.267363914 0.920340919  
0.278050478 0.08797704 0.249173302 0 0.1450152 0.24326213 1.028281  
0.1812143 0.6930811 0.8051865 1.663335 0.5409968 0.121658357  
0.1207958 0.2253241 0.298114304 0.6096536 2.518712342 1.02816 1.00276  
0.437345341 0.2417483 0.130083 0 0.6105393 0.5224 0.16038014  
0.5370304 1.255299533 0.08196419 1.064583449 1.336856555 1.198220326  
0.4183021 0.9256387 0.901160224 0.7233757 0.251547355 0.6146863  
0.657940714 0.3546692 1.981092 2.336655 0.150688703 0.05407245 0.7735144  
3.256303 0.483420938 0.3710916 0.047909599 1.190051 0.3276251 1.157382  
0.03147518 0.6098962 0.06293384 0.7003725 1.422815972 0 0  
0.5586804 0.1643343 0.6093501 1.090837 0.1501271 0.5203242  
0.598069491 0.08156426 0.04894501 0.187384128 0.07883441 0.096051035  
0.7146548 0.03765114 1.643018 0.07174558 0.3215226 0.1185998  
0.180206706 0.848616918 0.2615987 0.07076045 0.3429614 0.489597903  
0.1939975 0.1751373 0.1037388 0.56438183 0.509467 0.6100598  
0.367732387 0.3685385 2.761827015 0 0.0516799 0.088963693 0.1032221  
0.6023788 0.084202955 0.7905857 0.1379815 0.264442808 0.6958605  
1.366426258 0.804120855 0.1538479 1.68775953 0.5414785 2.535739  
1.795555 0.2052106 0.7281639 1.191803207 0.6826716 0.6789383  
0.1063174 0.1139692 0.07130519 0.7489187 2.142552 0 0.6219158  
0.4279189 3.000071 1.840163347 0.457107307 0.1973048 1.727391147  
0.553144854 0.03692952 0.556923319 0.7552473 0.1363042 0.277050378  
2.555719393 0.221254351 1.041186658 0.2731565 0.5403645 0.5497882  
1.109227 3.313413 0.5774004 0.545838284 0.5764801 0.4467613 0.595523335  
0.6359285 0.3396188 0.341902481 0.8677664 0.2394798 1.085206021  
0.5351843 0.629231 0.181075761 0.7090585 1.440519 0.1773999 1.543902413  
0.5909514 1.218482 0.196544066 0.2085336 0 1.66416 0.3683502  
0.855917989 0.4156516 1.27622674 0.7981554 3.340739 0.1183622  
0.3034897 0.4135289 0.850799424 0.12599 0.2791522 1.440293 1.219332  
0.2428997 0.1405301 0.5801682 0.346457 0.822958846 0 3.155688

0.0454396 1.035245 0.4218463 0.506661907 1.252097 1.105298855 0.5389505  
1.28833 0.135343506 0.412045691 0.1850371 0.2305864 0.237421002  
0.4474236 0.15923 0.5155623 0.2665455 0.2531608 0.2056724  
0.8699251 0.1237986 0.06183062 1.515998 2.318063 0.04021373 0  
0.272832982 0.6036672 0.7043415 0.049381824 1.193406 0.2524388  
0.8458563 0.3099149 0.1408997 1.173737959 1.277527 0.2474053  
0.2621817 0 1.092762 0 0.1072295 1.928691 0.1881374 1.034595118  
0.254926703 1.206001 0.03506591 0.4287697 0.506550695 0.7543614  
0.8701081 0.44439148 0.3258646 0.8754789 0.04157343 1.013326  
0.124185 0.7967933 0.883327489 0.5312298 0.116802741 0.08108434  
2.925873 1.034049 0.1124429 1.608955 0.1261527 0.2661159 1.300098967  
1.199631 0.956574 0.038638285 0.8324514 0.06371028 0.5764028 0.3611065  
1.58942 0 0.3349254 1.990903 0.89239916 0.2826856 0.075778768  
0.4633519 0.2961694 0.1377306 0.719846908 0.05327011 1.329996  
0.8022535 0.7449245 0.3569848 0.2383104 0.223447986 0.06164084  
2.210429 0.1617399 1.116006544 0 0 0.206728841 0.04172853 0.05634188  
0.2464577 1.317943 1.07717664 0.4201302 0.5908791 0 0.388006655  
0.07791023 0.3287661 0.754661 0.9202191 0.8111085 1.558456 0.7156527  
0.6380646 0.6932344 0.933133523 0.187132 0.119710418 0.1942178  
0.254330522 0.2205635 0.1740831 0.373122877 0.4667284 0.1296966  
0.5833372 0.3120261 0.1422937 0 0 0.614204307 0.7672421  
0.2056175 0.2840311 1.252277843 0.306633755 2.153016176 0.4036769 0  
0.06602251 0.02890244 0.142239 0.3460227 0.2365815 0.1222123  
0.2120541 0 0 0.198843374 0.172782 0.1245953 0.1757733 0.2472295  
3.154993 0.2486795 0.1289067 0 0.8204113 0.3697589 1.493401519  
2.691019 0.06281252 0.7658238 0.08218169 3.405174067 0.7492473  
5.229775 0.8005466 0 0.9289661 0.1679459 0.1778533 0.556187167 0  
0.2027699 0.069067103 0.2650226 1.325042 0.9440452 0.3457504  
0.4236623 0.224452987 1.675284575 0.6196667 0.5975394 1.171519  
0.112962333 0.58620332 0.70441779 0.2493811 0.2470777 0.3004197  
1.333678 0.6337531 0.0432883 0.08819389 1.391125871 1.087919958  
0.2249861 0.788634264 3.406652 0.443677559 0.2285519 0.893202 0.07261342  
2.496921 1.019216 0.3436369 0.7744114 0.1158247 0.1077674 1.192412055  
2.922659 0.4368303 0.2403652 0.4188783 0.528948051 0.1331154  
0.3911555 0.313987 0.25261791 0.2538229 0.03676357 0.1778417  
0.04631245 0.7919491 0.2491617 0.5817184 1.51596199 1.02765407  
1.002881413 0.1613845 0.274257436 0.131089924 0.3260966 0.2980857  
0.88571977 0.7421157 0.06875066 0.554835 0.845545321 0.07802987  
0.0568095 0.1268709 0.213055523 0.05323755 0.20878 0.1094446  
0.4356503 0.3538969 0.5643002 0.3540108 0.5391163 0.9405898  
0.6839164 0.953057 0.086368589 0.2368889 1.861428 0.2443462 0.183935  
0.2064169 0.2123719 0.06871731 0.094311171 0.03882082 0.089899519 0  
0.28595 0.07181949 0.8805694 0.427809 1.44264967 0.04625015 1.609746 0  
0.1449438 0.3885016 0.030339407 0.2965074 3.384926 0.278479 0.5022035

0.742857 1.20791 1.040251 0.368382764 0.03908509 0.274519 0.260411338  
0.0287309 0.5960611 0.7413788 1.005115 0.5545538 0.807861724  
0.528992072 0.124594275 0 1.0959 0.06598908 0.2046097 0.1437972  
0.2483129 0.230480833 0.090643 0.405610228 0.09650554 0.4951659  
0.4793868 0.7456015 0.392186 0.832799145 0.2274791 0.3983078  
0.880841 0.31636 0.3073836 1.004344 0.246775 0.667061363 0.6457441  
0.128434739 0.07642915 0.1725898 0.93063264 1.150116 0.5199807  
0.4253873 0.467980415 0.033092 1.060238 1.085319 0.175886512 0.1882351  
0.09609944 0.1041064 0.1223699 0.5800091 0.7329484 0.4699312  
AL049555.1 7.769308 0.19052669 0.1689863 0.010816274 0.046540779 0.18278978  
0.01779567 0.008400307 0.4129244 0.1564433 0.008201025 0.02971383  
1.458883 0.4643921 0.02443052 0.3887904 0 0 0.008144707 0.01823109  
0.017228984 0.02466369 0.509475699 0.02971034 0.02253717 1.048937132  
0.04889993 0 0.008782746 0.009499816 3.187685 0 0 0.008289705  
0.012667056 0 0.014257148 0 0.1446814 0.007595138 0.03850572 0  
3.557404 0.033271446 2.808154 0.08765924 0.03635767 0 0.1859387  
0.007111982 0.02352403 0 0.03753151 0.290729227 0 0 0.242472  
0.006366682 0.04934701 0 0.6060273 0.026163808 0 0.008356491 0 0  
0.07532376 0.01634448 0 0 0.011521453 0.008249257 0.0693029  
0.068226047 0.01063089 0.05181025 0 1.408947 3.669627 0.6965965  
0.1821019 0.00799664 0.109354613 0.147132902 0.03174912 0.2504803  
0.09249726 0.338366269 0.007848219 0 0 0 0.01542508 0.115707713  
0 0.437205932 0.067757969 0 0.107971456 0 0.09138519 0.306580649  
0.487746 0.009303463 0.064188601 0 0.031891798 0.547110775 0.1478189  
1.199041204 0.155165 0.04274332 0.06725893 1.07924 0 0.03443907  
0.03766043 0.01194201 0 3.396514 0.007211674 2.25167 0.007739061  
8.249039 0.02096647 1.081973 0 0.027571952 0.012328261 0.08780218 0  
0.120494844 0.03734982 0 0.009548038 2.444639 0.018680238 0.375971888  
0.447545014 0.032401129 2.440345 0.04203958 0 0 0.008936329 0.008984185  
0.013801265 0.007773882 0 0.144552276 0.01169393 0.2622969 0  
0.2559791 0.03229405 0.038175897 0.1488507 0.1388493 0.036627327 0  
0 0.007176759 0.008218284 0.008538246 0.009128514 0.214683467 0.03012956  
1.958072571 0.01870112 0.04257628 0.009112204 0.007643314 0.020652029  
0.06209534 0.05631268 0 0.03069438 0 0.018115423 0.008494927  
0.0211747 0.03641713 0 5.515162 0 0 0.06132002 0 4.554729198  
0.05802916 0.01838271 9.842058 0 0 0.07236273 0.552728845 0  
0.2605986 0 0.018521569 0.04678576 0.02798529 0.019209852 0.2815654  
0.01610423 0.017381 0.04717635 0 0.01664106 0.01466377 0.1502491  
0.006253433 0.01978389 0.054522 0.03253713 3.558318 0 0.03591398  
0.2978951 0.149831556 0.008621349 6.43386 0 0 0 0.008793308  
0.02768714 0.02144752 0 2.817977 0 0.017610068 0.02168998 0.06292394  
0 0 0 0.006098634 0.6809281 0.008672993 0.009314834 0.009536837  
0.1827715 0.310528552 0.03766552 0 1.042755 0.6661584 0 0.5587309  
0.028212028 0 0 0.01093429 0.01076063 0.1743029 0.01137227

0.07075075 0.006379426 0 0.124184598 0 0.0967461 0.007815608  
0.06123096 0 0.01793732 0.3391295 0 0.08636748 0 0.02323341  
0.031854911 0 0 0.0133893 0 3.501028 0 0 17.94407 0.04327382  
0.4520416 0.5776764 0.01606818 0.372885329 0 0.04064702 0  
1.354449743 2.06605 0.5379803 0.181204121 0.2532207 0.034189873 0  
0.008330891 0 0.02317701 1.254969 5.38615211 0.20181737 0.09455634  
0.1921157 0.02544167 0.9744897 0.007457636 0.04849826 0.005790382 0  
0.09707875 0.017976262 0 0.01614305 3.683029 0.042870854 3.890407  
0.281703 0.022642169 0 0.1923867 0.05363421 0 0.0863479 0.01721662  
0.185505423 0.027608655 0.05717706 0 0.005222976 0.30959631 0.013783273  
0.0424882 0.7484973 0 0 0.3390841 0.01918105 0 0 0.008240216  
0 0.5128989 0 0.522876809 0 0.03360357 0.005925795 0 0.04401243  
0.02515098 0 0.06219625 0.007215205 0.7853311 0.017769392 0.03628862  
0.02541096 0 0.06649362 0.582072555 0.07577747 0 0.006747149  
0.03892868 0.03267962 0 0.04796732 0.008654112 0 0 0.006985317 0  
0.02061728 0.02864369 0.1398742 0.01318413 0 0.056478382 0.1504126  
0.021976 2.03268 0 0.009881251 0.05936958 0.01681463 0.02498898  
0.01736222 0.8000117 0.08546213 0 0.06243835 0.065658071 0.190718991  
0.02275467 0.010634799 0.1111427 0.014957572 0 0.4290997 0.5654868  
0.05180183 0.01057247 4.344349 0.03481001 0.05857146 0.250686 0.144717987  
0.1182369 0.009817822 0.02431009 0.06354685 0.011888181 0.005385218 0  
0.132798 0.021899402 0.007334621 0 0.08393737 2.969627 0 0.01119989 0  
0.030664311 0.166296013 0.05966444 0.01632213 0 0 0 0.03617739  
0.020672317 0 0.7648645 0 0.110668891 0.007891795 0.0919297  
0.1454235 0.021548037 0.8938014 0.008446245 0.05903479 5.94332  
0.01022642 0.5453572 0.007160798 1.51989 0.03623981 0.0488259  
0.07068629 0.017470315 3.080378 0.4000554 1.548664 0 0 0.02863853  
0.00694994 0 0.02355759 0 0 0.02313636 0.007263689 0.01484319  
0.006181114 0.150938158 1.422007 0.02790972 0 0.3225056 0 0.006136942  
0.0149941 0 0 0.4994539 2.71263 0 0.03322391 0 0 0  
0.087791717 0.01743474 0.0964552 0.586813 0.03279209 0 0 0.019455006  
0 3.96443 0.2738333 0 0.02069384 0.6883865 0.3515947 0 0 0  
0.07808312 0 5.721145 0 0.09916239 0.010528468 0.122703 0 0.4632504  
0.03999508 0.257588 0.03585088 0.007130961 0.007101614 0.03265468  
0.084432719 0.07729901 0.01163694 0.086882255 0.01938676 0.02868539  
0.049169 0 0 0.01949646 0.03512549 0.14231066 0.1903775 0.1263511  
1.158204 0.008250839 0 0.140455 0.006789708  
AC234775.3 0.5060647 0.472770337 0.672223 1.179254191 0.548556859 0.994369545  
0.4981566 0.668323819 1.022063 0.3169259 0.555806996 0.7223383 1.46894  
1.058573 0.9358452 0.4406261 0.4836808 0.580102652 0.9599829  
1.128132 1.040738328 0.5814014 1.000829802 1.006778 0.06640907 0.670304117  
1.152727 0.5427395 0.9575469 0.419889 0.7524763 0.573554584 0.6401795  
0.218226297 0.9770732 1.2503987 0.234357475 0.46211851 0.9972935  
0.4514028 1.074248925 1.180012 0.574737134 0.7938137 0.441176328

1.358973 0.4797014 0.2142664 0.516441884 0.7734998 1.236433 0.1155283  
0.547459474 0.5898244 0.285558738 0.4513817 0.6346488 0.6898419  
0.9004973 0.6906889 1.27537 0.3014899 0.077095488 0.7196483  
0.7140851 0.8778931 1.430059 0.5649699 1.878294 1.252738 1.589428  
1.79933131 1.263997 0.4959413 0.335063387 1.190367 0.343499585 0.9229142  
1.593344 0.5712577 0.7269709 0.766557 0.8247144 0.617606292 0.289032417  
0.2182914 0.1054395 0.1817045 0.583636525 1.040667 1.085638 0.7007642  
1.630208446 0.9645702 0.6590575 0.170474855 2.635949 0.143143473  
0.449232233 0.5236529 0.609794584 0.5229551 1.136959 0 0.8953142  
1.452943 0.598946835 1.204774 1.660204699 0.413928342 0.5501937 0.56432263  
0.6992722 0.2015191 0.4756519 0.244626 0.7233539 0.845664659  
0.1849533 0.7917498 0.2323531 0.5660818 0.8075096 0.9130561  
0.250847 4.375996 0.9061179 0.4463468 1.109887 0.771825514 1.16246476  
0.8702466 0.137278443 0.684750261 0.572295 1.360981361 0.450155 0.5416155  
0.137610134 0.276964047 0.357948296 0.62058534 1.058273 0.9910061  
1.092313 0.1043905 0.5003118 1.588393 0.406674483 1.420227 1.040937  
1.41981478 0.5857839 1.619402 1.018931938 0.9051359 1.237069 0.140613585  
0.5981052 0.2045698 0.625981114 0.8452496 0.3816009 0.740158  
1.113953338 0.2515919 0.376579 0.679455234 0.5504432 0.462813961  
0.137764 0.4704647 0.671261099 0.4954871 1.247511638 0.2927568  
0.8711511 0.2821928 0.3391706 0.295774 0.213518982 0.5006309  
0.353568 0.9926028 1.288359 0.7962741 0.4397456 1.210305 0.4646273  
0.809347408 0.633358873 0.4274786 0.325004 0.3393742 0.09428845  
1.132458874 0.2487653 0.750298355 0.5436271 0.1616615 0.435616277  
1.036953739 0.2205777 0.2473883 0.820767298 0.2074184 0.1660871  
0.614588 0.9135076 1.093975 2.231107 0.6049251 0.4058366 0.3685331  
0.7287017 0.7711538 0.5033459 0.6211555 1.045404252 0.9947626  
0.5724726 0.323767111 0.2032325 1.604936 0.919353 0.2770809 0.5248836  
0.155464615 0.4623105 0.9690401 0.2187778 0.03308199 0.9769896  
0.181617246 0.09586904 0.2595804 0.6279659 0.711526778 0.683755388  
1.168084 1.191332 0.4088999 1.646851345 1.095966 0.2992017 0.505667744  
0.6381751 1.333534 0.5947028 0.3667018 1.751778 0.3482732 1.219252738  
0.844353 0.452521594 1.014914 0.9829408 1.266902 0.6869559 0.3335639  
1.954983 0.3806755 0.215251819 0.7150242 0.366527 0.322417642 0.7668105  
0.4936576 0.6342594 0.8455571 0.1435383 2.481321 0.8555476  
0.6617863 0.469325778 0.8986185 0.700087233 1.420327 1.081233 0.7661967  
1.362880884 0.444513083 10.1469 0.6375633 1.253653 0 0.8995976  
0.532732698 1.157316 7.006686 1.036331 0.110863455 0.4237013 0.85979  
0.698235065 0.547178 1.477600154 0.3987227 0.785542 0.933871544 0.3414722  
1.330479 0 0.726836508 0.8823096 0.6531887 0.7996543 0.8388583  
1.120726 0.6669003 0.6654261 0.3803098 0.381409 0.873999844 0.6413407  
1.331900053 0.6945654 0.555831084 0.9728331 0.5187994 0.200155397  
0.4299257 0.6699675 0.2844739 0.278968457 0.678498 0.355119 0.341636797  
1.098264714 0.3369611 0.3880925 1.7391 0.525246844 0.690445314

0.375593095 0.6416165 0.3601289 1.416666 0.7235303 0.5651978 1.83743  
0.4230337 0.267091 0.9690054 1.133499 0.5637637 1.145673283 0.6796972  
0.1732812 2.304881 0.8595873 4.409428 0.8893324 1.106397 0.9621693  
0.7653837 0.4132309 1.099562399 0.3564325 0.3743856 1.043335 1.09396  
0.171516196 0.4465788 0.60611 1.312176 0.5047198 0.6740669 0.6756879  
0.9187277 1.071025523 1.209765 0.9265802 0.987996479 0.6634453  
1.154285 0.9002968 0.778524 0.6798568 0.974698826 0.404167268 0.7879339  
1.068466 1.132746 0.605967147 1.077312428 0.27990585 0.2972805 0.8836042  
0.8697256 0.1096443 0.7869584 1.496482 0.2628339 0.856800645 0  
0.6034498 0.877435765 5.960468 0.661120143 1.852664 0.366012 1.255127  
0.4960855 1.261709 1.365468 0.9487982 0.2416251 1.188316 0.852865451  
0.6097042 1.359693 0.931232 1.217126 1.366180358 1.063178 1.398858 1.463155  
0.301139033 0.2161253 0.5039859 0.4593341 0.331247 1.326181 0.7095453  
0.2773803 0.210832722 0.441013984 0.351620007 0.6733376 0.735603597  
0.729254314 1.749289 2.451846 0.609140062 1.449006 0.922003 0.220468 0.652204165  
0.3720693 0.4063265 1.159502 0.19048333 0.09519458 0.2986572  
0.7393073 0.173109 0.6930737 0.224229 0.9917159 0.7029161 0.2936612  
1.55862 0.5680568 1.029576777 1.512797 1.317507 1.140841 0.6029759  
0.5331387 0.6118103 0.4095803 1.030569983 0.832990638 0.857334435  
0.589951 0.7499213 0.8133338 0.2186882 1.967064 1.36393487 1.157805  
0.6305073 0.9761789 0.3023713 0.2315611 1.12117059 2.076569  
0.3930273 1.032787 0.4988861 1.444828 0.9952368 0.2936973 1.003746765  
0.3494422 1.014465 0.698466081 1.267226 0.9237129 0.787715 1.623328  
1.062432 0.802525239 1.146540467 0.148525493 0.1315515 0.9029482  
0.6293104 0.6707518 0.6285281 0.4228674 0.989100061 0.4592256  
0.448980137 0.7477709 0.4722192 1.936628 0.7535576 0.1363584  
1.178899552 0.6327341 0.9232456 1.338784 0.966381 0.2355582 0.7042657  
0.9875837 0.753334061 0.649497 0.976035494 0.5238775 0.1371598  
1.045379383 1.371022 0.2535771 0.2897673 1.235276701 0.5325492  
0.7468392 1.837167 0.104834796 1.301462 0.2291151 0.08273495 0.8509307  
0.749031 0.4368641 0.8002747  
AC090948.2 0.672702 0.48115279 0.376459 0.333636033 0.279141522 0.481904862  
0.1829735 0.604598695 0.2264349 0.1005336 0.562148303 0.7383282  
0.5276419 1.021035 0.6698467 0.384376 0.2187808 0.562274438 0.2233152  
0.6248349 0.265720424 0.3944733 0.116408573 0.636415 0.1544835  
0.563076587 0.5506693 0.4509082 0.602023 0.3907052 0.6941405  
0.305760186 0.4886477 0.217562995 0.3409362 0.868277281 0.599689199  
0.75738572 0.6669842 0.2333493 0.859018201 1.346102 0.261582488  
0.5681852 0.627172653 0.3512554 0.04291928 0.1246088 0.23505033  
0.3748639 0.6093732 0.1881227 0.201082539 0.1286319 0.265711393  
0.9000195 0.4258691 0.3438726 0.2836673 0.8879181 0.261778  
0.2697455 0.134507022 0.4731083 0.2004817 0.563363 0.250639 0.6336593  
0.3921225 0.208155 0.7665325 1.006932094 0.3958181 0.2375222  
0.545606763 0.4918764 0.244158097 0.3853448 0.5220424 0.09492023

0.2486926 0.5349589 0.6577661 0.31232634 0.46224688 0.07254262  
0.4660278 0.2113442 0.65055466 0.2689824 0.3885316 0.2157547  
0.51165385 0.457075 0.3700651 0.169956694 0.7664816 0.083246559  
0.290284028 0.1074832 0.27753833 0.2862399 0.5916093 0.116749487  
0.6851042 0.3507439 0.65998173 0.5513302 0.983726269 0.886878941  
0.453292 1.170060241 0.2502578 0.1757933 0.1844135 0.3912282  
0.4206739 0.94426556 0.0430246 0.3478957 0.2702547 0.184358  
0.4448989 0.5427971 0.3713377 0.7698873 0.3113867 0.5685985  
0.860622 0.188994975 0.591537919 0.3282816 0.23950707 0.648956906  
0.2816203 1.042453809 0.3599644 0.4094767 0.064022871 0.684552982  
1.2270986 1.388106872 0.6943536 0.5475133 0.4065573 0.2023646  
0.3369028 0.2771239 0.307457446 0.5328693 0.9291685 0.949564069  
0.8416519 0.3210613 0.632075037 0.3759936 0.4703966 0.490651658  
0.2318895 0.277596 0.225959434 0.7919636 0.3328859 0.2459694  
0.985829812 0.673053 0.3754344 0.272513227 0.2065264 0.753631811  
0.288425 0.3283243 0.187381822 0.2619597 0.566246417 0.8512787  
1.133879 0.1914641 0.2892972 0.2580156 0.3104354 0.2329176  
0.2660979 0.6552662 0.6916231 0.3367865 0.1948485 0.4357262  
0.1200928 0.770210686 0.456035501 0.5966509 0.6615329 0.03588482 0  
0.658593104 0.1240046 0.446986254 0.4598574 0 0.225188556 0.190437193  
0.09620944 0.6394276 0.52670418 0.4135759 0.1103882 0.41699  
0.646751 0.5923358 0.5418229 0.9800154 0.5578618 0.06429727  
0.6441516 0.4110997 0.3903013 0.1733949 0.702538019 0.4184998  
0.2219516 0.513518435 0.2659319 1.186154 0.1724707 0.6803658  
0.2930414 0.39178553 0.5377228 0.367536 0.2181129 0.1539134  
0.04208728 0.060355073 0.03716908 0.08626381 0.3391143 0.689659525  
0.353462202 0.7733695 0.2430988 1.01065 0.319247778 0.9805695  
0.2088046 0.448116231 0.4518193 0.337187 0.1729278 0.1254466 0.71744  
0.5892126 1.482598752 0.3989718 0.121462425 0.131163 0.6269593  
0.5575634 0.3118098 0.09699375 0.4154205 0.07379526 0.325472963  
0.607751 0.3315784 0.187505295 0.02623215 0.3091756 0.4303368  
0.6437355 0.4006855 1.036027 0.3317017 0.238884 0.400313807 0.09798766  
0.682949431 0.2753353 0.7186308 0.3819339 0.88066377 0.59088264  
9.68138 0.6674067 0.9113438 0 0.5231703 0.15490809 0.235033  
12.32891 0.8689932 0.902632952 0.4150027 0.2500099 0.47772445  
0.2025017 0.78119415 0.4149455 0.8280226 0.644934338 0.2912605  
0.8192686 0 0.268990429 0.6481468 0.2785703 0.2906545 0.9756933  
0.6134302 1.828401 0.2976811 0.1561222 0.07393744 0.246440532  
0.324329 0.276635776 0.6732194 0.205704089 0.7951237 0.1508566  
0.465609718 0.08824508 0.4195977 0.1838208 0.288421288 0.6576458  
0.5605627 0.317891828 0.520428039 0.1959632 0.2850937 0.6623271  
0.578771438 0.590493489 0.946530118 0.139927 0.1047183 0.1830837  
0.7614051 0.3286966 0.4361537 0.1640131 0.3389008 0.2450153  
0.462595 0.3530828 0.321651487 0.3114366 0.1439621 0.5077376

|             |             |             |             |             |             |             |
|-------------|-------------|-------------|-------------|-------------|-------------|-------------|
| 0.1428291   | 12.6709     | 1.896401    | 0.4825772   | 0.3197483   | 0.3956593   | 0.5126798   |
| 0.548110132 | 0.6218609   | 0.39191     | 0.3539446   | 0.4937701   | 0.864474068 |             |
| 0.1731417   | 0.9735424   | 0.8787324   | 0.6671023   | 0.5320143   | 0.3783994   |             |
| 0.6370447   | 0.622865907 | 0.4020293   | 0.1874303   | 0.23940813  | 0.3307144   |             |
| 0.3533085   | 0.2290649   | 0.4793915   | 0.5196393   | 0.577960756 | 0.2212213   |             |
| 0.3436733   | 0.7155254   | 1.100942    | 0.352406426 | 0.440258788 | 0.081391063 |             |
| 0.5186596   | 0.399676    | 0.327281    | 0.09564712  | 0.2562917   | 0.2100711   | 0.3362783   |
| 1.028709628 | 0.703933079 | 0.1559744   | 0.364486994 | 11.73233    | 0.102528325 |             |
| 0.7922323   | 0.6579248   | 0.4278913   | 0.2219259   | 0.3261156   | 1.310268    |             |
| 1.879046    | 0.08029691  | 0.5229775   | 1.025051526 | 0.5065425   | 0.4710814   |             |
| 0.6109993   | 0.5444861   | 1.100099405 | 0.258395    | 0.8135203   | 0.3759847   |             |
| 0.32524236  | 0.3267938   | 0.254868    | 0.164388    | 0.1926401   | 0.4705959   | 0.7101304   |
| 0.1613134   | 0.455415768 | 0.284973575 | 0.408976463 | 0.1678227   | 0.443642201 |             |
| 0.424105346 | 0.3767841   | 0.4546335   | 1.228072447 | 0.514481    | 0.6434404   |             |
| 0.1538585   | 1.310295409 | 0.1893331   | 0.4726067   | 0.2931827   | 0.258480925 |             |
| 0.2214455   | 0.3763222   | 0.7840296   | 0.4026933   | 0.2453434   | 0.7824162   |             |
| 0.3435913   | 0.3270305   | 0.2173585   | 0.7251454   | 0.7488144   | 0.299380481 |             |
| 0.5630611   | 0.2419609   | 0.4799555   | 0.4144244   | 0.3577526   | 0.2699207   |             |
| 0.3334739   | 0.217941299 | 0.349869196 | 0.124647914 | 0.3716831   | 0.3171814   |             |
| 0.1742641   | 0.05087214  | 0.5084295   | 1.172571822 | 0.5450793   | 0.3507355   |             |
| 0.5271564   | 0.4019364   | 0.1616001   | 0.37859707  | 0.3083361   | 0.243807    |             |
| 0.622079    | 0.1740794   | 0.7860447   | 1.305357    | 0.3795615   | 0.510771847 | 0.2980585   |
| 1.027694    | 0.391155683 | 0.5577055   | 0.3719041   | 0.7150888   | 0.8991078   |             |
| 0.2196864   | 0.311144537 | 0.500086799 | 0.086376528 | 0.09180615  | 0.9161647   |             |
| 0.3888558   | 0.8510894   | 0.8307431   | 0.4180689   | 0.255653916 | 0.1256788   |             |
| 0.080341236 | 0.7693922   | 0.4119359   | 1.033949    | 0.6742141   | 0.06797195  |             |
| 0.2525899   | 0.1577027   | 0.1840879   | 0.8549155   | 0.3289808   | 0.12177     |             |
| 0.2867011   | 0.3177197   | 0.340751577 | 0.5316083   | 0.200337698 | 0.1589564   | 0           |
| 0.347400646 | 0.9302209   | 0.524339    | 0.2106464   | 0.509823649 | 0.2752973   |             |
| 0.5345625   | 0.6320252   | 0.121935508 | 0.5741839   | 0.3997328   | 0.3608652   |             |
| 0.7635098   | 0.6701641   | 0.5883559   | 0.5352192   |             |             |             |
| LINC00926   | 0.219742    | 0.855857339 | 0.1914142   | 0.609741296 | 1.048223532 | 0.355577226 |
| 1.232889    | 2.757194158 | 0           | 0.05151352  | 0.332692512 | 1.142788    | 0.2047044   |
| 1.075596    | 0.4590704   | 1.272327    | 0.4708348   | 0.259299087 | 0.2317146   | 0.3697919   |
| 0.140693979 | 0.8272834   | 1.011031774 | 0.9078619   | 0.8727118   | 0.499363474 |             |
| 0.3054728   | 0.2495296   | 0.2591209   | 0.3053017   | 0.2366035   | 0.256372177 |             |
| 0.4649982   | 1.270866752 | 0.2664116   | 0.700727454 | 0.946985605 | 0.510770398 |             |
| 0.4725252   | 0.8160547   | 0.408150178 | 1.038674    | 0.084888948 | 0.247468    | 0.622277601 |
| 0.3023726   | 0.8576837   | 1.379154    | 0.140513416 | 0.109486    | 0.7006746   | 0.8262369   |
| 1.20550873  | 0.6986582   | 0.199120598 | 1.152928    | 0.2269444   | 1.030774    | 0.1878388   |
| 0.5719626   | 0.06706768  | 0.8749194   | 0.944225367 | 0.3020942   | 0.09245435  |             |
| 0.4546519   | 0.08406177  | 0.6782367   | 0.7276321   | 0.1013259   | 0.2425946   |             |
| 1.805836244 | 0.1260367   | 0.135616    | 0.347465024 | 0.1904287   | 1.105490079 |             |
| 0.5204248   | 0.1043231   | 0.547169    | 0.2828954   | 0.07538124  | 0.3833832   |             |



0.230452403 1.007714005 0.5575639 0.3544194 0.3939159 0.973947096  
0.2439536 0.1269161 0.151089 1.397222787 0.5141882 0.6094986  
0.535578986 0.1234345 1.446026082 0.133867696 0.110149 0.692093403  
0.1540032 0.3958669 0.305095143 0.9057044 0.1323404 0.123997658  
0.5367543 1.064131986 0.685551931 0.2049418 1.868810893 0.1538789  
1.959168 0.9000525 0.1640175 0.3836858 0.768100454 0.6878307  
1.050698 0.4380967 0.1255038 0.1975712 0.2902225 0.7583773  
0.08547309 0.2908809 0.5510326 1.146558 1.125779551 0.860600955  
0.4583775 1.853128022 0.829804259 0.1023237 0.884322585 0.2917603  
0.05326107 0.132861853 1.108007164 0.087578232 0.712690161 0.2813957  
0.5404211 0.3788828 1.468277 0.9227825 0.743126 0.70166589 0.4832858  
0.6925194 0.653679784 0.9795841 0.513278 0.121453503 0.481649 0.1999146  
0.532990256 0.7057934 0.6522743 0.1003443 0.4323902 0.7903129  
0.1361178 0.969869525 0.4183461 0.4953606 0.167563325 0.03809678  
0.601309157 0.7882096 0.4598389 0.27364181 0.5033567 1.479741251  
1.053414 1.665124 0.0882958 0.23044 0.2291597 1.216866155 0.08503493  
0.3978908 1.587661 0.7383094 0.3623966 0.4530266 0.6852568  
0.8722685 0.530594249 0.037747199 5.747623 0.2324368 0.7888206  
0.2472555 0.607435013 0.7370651 0.965224376 1.192884 0.8309991  
0.086540165 0.78552098 0.1971913 0.1179516 0.516152869 0.3231731  
0.1909003 0.6089486 0.5929621 0.6845917 0.5742572 0.4017288  
0.1253338 0.07907039 1.141327 2.522031 0.05571174 0.1199445 0.664580905  
0.457892 1.044025 0.489417079 0.3043226 0.3975524 0.9809536 0.363299  
0.2139705 0.588355954 2.431146 0.4595152 0.4246929 0.02957453  
0.4011197 0.148444856 0.4570916 0.5702017 0.1603962 0.784508856  
0.122252258 0.7775567 0.1980569 0.9001593 0.726308274 0.5828362  
0.6134192 0.697456457 0.4663328 0.9329852 0.07974756 0.4280981  
0.1367536 0.4302264 0.966121623 0.3208035 0.062237492 0.2678723  
1.06014 0.9060649 0.1647646 0.9244147 0.2083807 0.2325486  
0.307888129 0.6834682 1.354355 0.069999641 0.6935754 0.09844793  
0.3638334 0.3325996 0.7288567 0.09669262 0.2396497 1.032277  
1.006958986 0.07029259 0.746996075 0.2116232 0.5720674 0.459903  
1.07398255 1.038876039 0.864588 0.5984649 0.8172039 0.3423902  
0.3428513 0.32742225 0.1543709 1.295592 0.1896002 3.838834721  
0.4784578 0.1681383 0.297415696 0.2001127 0.174123896 0.7204017  
0.7944273 0.631362324 0.9768581 0.6891622 1.51342702 0.61433254  
0.1162389 0.2608245 0.5227503 0.6980021 0.4832707 1.115733  
0.6619895 0.6479773 0.1534368 0.644009763 0.06481275 0.110563833  
0.2845907 0.474313599 0.4748037 0.2040696 0.302200039 1.008336  
0.1750734 0.2091018 0.288185458 1.410255 0.3310738 0.150671542  
0.501820599 0.1506177 0.6354583 0.1981229 0.741407948 0.508316881  
1.471798073 0.1218879 0.2307285 0.04925146 0.1047231 0.2223204  
0.1776711 0.1311032 0.08248526 0.5649575 0.2382194 0.1589512  
0.473253373 0.2651491 0.2611329 0.4932736 0.2766423 1.84343

0.1987606 0.1868286 0.1146876 0.3041045 0.2659815 0.660002879  
0.6436574 0.167346 0.7578325 0.1401277 3.807731238 0.2395386  
1.718433 0.5580898 0.4101888 1.321416 0.1029121 0.1105625 0.323716627  
0.3399005 0.104443 0.220811423 0.1129723 0.7929363 1.906475 0.2087947  
0.2882595 0.324623533 1.292236277 0.9861522 0.7988808 0.5354553  
0.397261645 0.786091356 0.775710733 0.6023935 0.1887034 0.5259656  
0.3430679 0.7766887 0.05535806 0.1362811 1.764178132 1.027984039  
0.1318704 0.91887678 1.686388 0.252171056 0.5504557 0.7793455  
0.1702427 1.207654 0.7853795 0.3540019 1.38922 0.08023125 0.2009807  
1.443556328 1.129055 0.1189672 0.5678074 1.322438 1.039699047 0.2156259  
0.2441543 0.8821572 0.353820483 0.2704954 0.1645493 0.170571  
0.1036445 0.6550804 0.1445652 0.4587473 0.68391137 1.011924156  
1.112763759 0.4729592 0.696581995 0.074507002 0.6950327 0.1207129  
1.314197409 0.7526824 0.2271264 0.08672101 1.182011979 0.1164174  
0.3269217 0.1487249 0.295165228 0.1531831 0.2936918 0.6142699  
0.551961 0.09697957 0.5278661 0.2225859 0.1113149 1.021466 0.3987182  
1.889126 0.225502289 0.1262245 0.6013081 0.2386965 0.4116354  
0.6562601 0.2489539 0.09520035 0.02345141 0.165483134 0.148497147  
0.1274556 0.530235 0.1109786 0.7038075 0.9802061 1.590424962  
0.2760134 0.9165581 0.09973498 0.1776342 0.7452368 0.061431304  
0.4186783 1.269571 0.2341193 0.5664104 0.4124923 2.72216 0.8051794  
0.588870241 0.1624444 4.224435 1.720602794 0.08879251 0.6669743  
0.8725194 0.5424789 1.591424 0.674392427 1.11722853 0.252278787  
0.1223081 1.233149 0.1336148 0.1744397 0.4137549 0.1096297  
0.761422233 0.2608117 0.327277217 0.1388402 0.5540757 0.1475863  
0.5043834 0.2089735 1.076096116 0.8323128 0.1839374 0.2863033  
0.2612837 0.280778 1.23401 0.6800029 0.692170298 1.101056 0.188197674  
0.06108708 0.2452352 0.495880843 1.996807 0.3828575 0.1748555  
0.448847937 0.09169073 0.7652373 0.892902 0.37019341 0.2286834  
0.1689794 0.09985019 0.7215897 0.484184 0.6906502 0.1395082  
AC148477.4 24.75753 0.518913566 0.1184177 1.236047383 0.112893185 0.11368977  
0.01918518 0 0.1958731 0.04216467 0.097255105 0.3443648 5.95923  
0.08501647 0 0.0241816 0 0 0.01756132 0 0.232178099 0.02658947  
0 0.008007542 0.07289071 0.122621166 0.1581543 0 6.50487 0.01024158  
11.6578 0.034974141 0.2122625 0.068435878 0.008936977 0.013656118  
0.051446237 0.007685183 0.06385348 0.08257675 0.040940887 0.07472214  
0.03657 10.52252 0.062771324 3.690357 0 0.03919653 0.032860727 0.1179159  
0.2453534 2.536082 0.179213551 0.1888228 0.32387744 0 0.02679199  
0.5228091 0.006863802 0.1064002 0.027448 0.1697005 0 0.04579056  
0.04504489 0.03322679 0.007167285 0.02952914 0.0704827 0.2073423 0  
0.105579048 0.1067204 0 0.163451632 0.05157432 0.076801543 0.09523859  
5.706363 18.63126 0.04693674 0 0.008621029 0 0.330460934 0.2167782  
0.03857688 0.1745093 0.080075061 0 0 0.08294863 0.1514768  
0.006535272 0 0.035640668 0 0.183300287 0.027393228 0.0450794

0.009700168 0 0.01094674 0 0.02586049 0 0.046133692 0.02167807  
0.286516296 0.031882701 0.2516223 0.062837836 0 0.009216156 2.755403  
0.03356275 0.03528687 0 0.04060101 0.01287446 0 8.607525 0  
0.07423496 0 13.80387 0.06027616 0.1321982 0.1579167 0.059449618 0  
0.06023684 0.06278211 0.037115215 0.1369049 0 0.03088069 1.862698  
0.050347043 0.01266651 0.034463569 0.078594874 5.946804 0.06345092  
0.01598566 0.0509241 0.07707272 0.03874273 0.007439444 0 0.02657056  
0.090906155 0 0 0.182254765 0.1103865 0 0.010289181 0.1167078  
0.1247424 0.086871929 0.008590255 0 0.09284557 0.035439918 0.009204925  
0.009841281 0.44574835 0.1039428 0 0 0.0459007 0.009823698 0  
0.311703968 0.0803326 0.03035483 0.008603758 0.0827276 0 0.058589704  
0.4304365 0.00760935 0.1668577 0.07251821 31.45047 0.1149204  
0.2424918 0.5194198 0.071785144 16.772496213 0 0.06936319 0.1015903  
0 0.05524395 0.02600431 0.060258206 0.1175291 0 0.005902879  
0.029951639 0.02017554 0.04022723 0.124258711 0.03252326 0.008680833 0  
0.05812566 0.006900857 0.1614638 0 0.09448875 0.08764223 0.04265729  
0.3409191 0.05261651 6.681457 0.127493064 0.00774364 0.05585307  
0.021537416 0 15.3649 0 0.09011097 0.02304453 0 0.02984899 0  
0.3087398 9.610273 0.0397165 0 0 0.02713485 0 0.173549569  
0.416939519 0.0262993 0.9940883 0.03740077 0.351475245 0.02056297  
0.1240638 0.140957922 0 0.01060644 0.126923 0.1420562 0.01805404  
0.05791898 0.202765755 0.02896135 0.050942411 0.1001985 0 0.1252752  
0.05517102 0 0.165061 0.03481918 0.007875359 0 0 0.016851723  
2.533209 0.1458798 0.0193379 0.01124951 0.01050319 0.09311117  
0.09390506 0.02504751 0.057236979 0.1027422 0.140463322 0.3175646  
0.1776108 4.144824 0 0.04646651 11.86233 0.1166318 0.00955564 0  
0.008661403 0.024363682 0.03360509 0 0.01763533 0.865307918 2.415024  
0.03932113 0.075135692 0.1273965 0.049145957 0 0.008981379 0.064063692  
0.1332624 0.1073776 0.12903801 0.785689517 0.3228082 0.007966012  
0.02742819 0.271498 0 0.03485671 1.510686 0.05729414 0 0.116279247  
0.08161585 0.052210567 35.3225 0.101680198 8.13824 0.2942082 0.024410102  
0.05551614 0.5090936 0 0 0.01034334 0 0.041664573 0.014882189  
5.767885 0.01494635 0.04504635 0.111256677 0 0.02290287 0.01467166  
0.08783958 0 0.03781658 0.06203621 0.027439 0.01031828 0 0.0924854  
0.007275615 0 0.794966865 0.0301429 0.1086822 0.1086043 0.08985568  
0.1186224 0 0.01124429 0.05028946 0 0 0 0.2868953 0.04109263  
0.03181017 0.005973795 0.083669548 0.01361571 0.0211196 0.5382742  
0.008393657 0.05284693 0.01831201 0 0.195926588 0.00702561 0.5011384  
0.331352602 0.01155871 0.04445421 0.05146705 0 0.05685425 0  
0.069586622 0.01801745 0.02369192 12.87586 0.024633727 0.138486311  
0.204816773 0.01812754 0 0.07487156 2.86824 0.3570237 0.2359973  
0.250022 0.020224213 0.063264801 0.0122657 0.103186614 0.1198209  
0.048376443 0.01993615 0.0243476 0.6017234 0.2652713 0.06268889  
10.60359 0 0.1262896 0.01175043 0.083209479 0.1752699 0 0.008736085

0.04567245 0 0.05225133 0.426497 0.04979725 0.031479118 0.03162927  
0.05611929 0.2456193 2.272358 0.04111918 0.01207439 0.01268555 0  
0.026892096 0.012864625 0.08798292 0.249197476 0.009528939 0.1303719 0  
0.059430508 0 0 0.07259581 0.108463705 0 1.065408 0.009222254 0  
0.3018477 0 0.1591108 0.5172352 0 0.2324412 0.01543985  
0.2057392 0.05860419 0.09650354 0.1247 0 9.571567 0 0.7193428  
0.2506922 0.09002676 0.1775294 0 0.089121339 0 0.039208825  
0.02698047 0.2244859 0.1174627 0.01600217 0.04664621 0.19526835  
12.45594 0.6920459 0.1211765 0.03160793 0.05930445 0.019848368  
0.01616486 0.09586387 0.006747554 0.01825261 24.66587 0 0.6566647  
0.02295238 0.2045591 0 0.028393986 0 0.03899496 0.07029247 0  
0.008637978 0.019574514 0.052435203 0.013585154 6.391715 0.09840486  
0.02158538 0 0.7421367 0.1547133 0 0.02964981 0.0379078 0  
0.4319239 21.59332 0.03534642 0 0.045402184 0.2480322 0.08685909  
0.05762557 0.00862359 0.03830356 1.996925 0.03075103 0.229683558  
0.2024253 0.112031195 0 0 0.827384281 0.1985548 0.05154197  
0.6891064 0.014578945 0 0.02101877 0.4354835 0.105477954 0  
0.03143465 6.008597 0.01779015 0 0.1682466 0.007319858  
AC009549.1 3.366103 1.356620931 0.8524689 0.731651024 2.868047872 0.73349007  
1.04054 1.781727047 1.363444 0.3699349 3.751589725 1.107175 1.462483  
0.9844856 1.708586 0.5657576 1.474184 0.724153449 0.8123983 0.9405878  
0.780245105 0.5372618 0.545173245 0.6471956 3.255699 0.825886765 1.08924  
1.689381 0.1510413 1.644623 0.3735449 0.530010701 1.478944 2.814124436  
0.9314069 0.943981172 1.303950536 0.424991551 0.2910251 0.380542  
0.383144536 0.3884921 0.806985597 0.5702073 0.953643309 2.044532  
4.106199 40.78788 1.170697493 0.2131789 1.198622 5.528914 0.964146647  
3.012093 2.53324136 1.154117 0.2089436 0.7860527 0.4014673 0.9193661  
0.9340785 1.30841 2.024785427 0.5843593 1.408366 0.9540583 0.2362866  
0.5417048 1.330466 6.255267 2.126779 0.812375192 0.6336711 0.4767349  
1.121170582 0.4936268 2.220093007 0.4419613 0.5588269 1.936913  
1.380996 0.6561655 0.4859121 1.326886777 1.208930372 3.106167 1.468699  
0.4418673 0.709641089 0.683847 0.6579803 0.3448321 0.59401973  
1.014704 1.282152 1.336065258 0.3052418 0.612647274 2.262562554 1.018732  
0.897472703 1.579922 0.1862634 0.390549884 1.017563 0.6826513 1.692622184  
1.037423 0.633775406 0.949370767 0.2854307 1.832935269 1.025523 1.715183  
2.467597 1.439608 0.5816577 0.723880923 0.7771988 0.828337 1.898515  
0.7576767 0.3720685 0.3473633 1.135723 0.3863136 3.156999 0.5788919  
0.8876759 0.790281478 0.727919437 1.58319 1.161737142 1.89459305  
0.4967305 1.21406641 8.188229 0.3477133 6.114525939 0.565755741  
1.473360507 0.900836901 0.3484123 2.40992 0.5270053 1.232047 0.8196405  
0.4120149 0.727865315 0.4367252 0.8665426 2.099237416 1.380931  
0.8448901 0.704804905 0.9894475 1.601338 3.720338553 0.5585153  
0.5836995 0.781074483 0.2649273 1.843574 0.9791509 4.211753637  
0.753761 1.465219 1.1121643 1.202116 0.63626397 15.99487 1.086106 0.699958905

0.7711496 2.320401244 1.551993 0.8958049 0.8692296 0.3695068  
2.896223 2.803861371 1.879712 0.8901495 0.8350453 0.4241627 0.05633083  
3.63382 0.8521292 0.863728 0.877920392 0.621946035 1.696527 0.4320535  
2.232777 0.7826426 0.756405508 0.1521005 1.053799824 0.9422167 4.05707  
0.357817403 0.913104547 3.13257 1.165761 0.814891965 1.913831 0.4800511  
1.524441 1.298105 0.5650885 0.6868435 9.58285 0.8900132 0.6667695  
2.52907 6.113429 1.007204 0.7153825 1.265453098 0.8399782 1.989823  
2.038479347 9.983226 1.619691 1.153897 0.5270637 0.3757743 0.746033437  
1.555423 0.7622776 0.1580865 0.2188199 0.8025042 0.868167986  
0.6714245 0.8801364 2.015748 0.692113829 1.862280391 0.5453828  
0.6017776 2.267139 0.544652616 0.6232374 0.7605804 0.487186864 1.15516  
0.6993331 0.6266837 0.5203579 0.5951944 1.934075 1.304585967  
0.7494509 0.189613939 1.34137 0.4934827 1.745256 0.4563408 1.135621  
2.340485 1.209612 4.556086904 0.749017 1.758866 2.446243463 0.3334563  
0.9012776 0.9048667 0.5383553 1.474409 0.03713264 0.6768603  
0.4528311 0.633042346 0.9724374 0.623871407 0.7828928 0.6267469  
0.5962337 1.374796586 1.000662904 1.542196 1.786085 0.4268073 1.517785  
0.5618764 0.90684629 0.7576413 0.6757266 0.2250544 3.192025835  
0.7028093 0.3136245 0.183779406 0.5516036 0.70557678 2.098441  
0.8691748 0.897037346 0.7794586 0.8450226 0 0.552750033 0.2168178  
0.8895144 0.7875599 0.8661849 0.4104088 1.492021 0.677145 2.193489  
0.9027735 1.226282825 0.6075686 0.999432881 1.76786 1.32708942  
0.6342706 0.6762239 0.588409909 1.928621 3.930182 3.234461 1.905530684  
1.352972 1.55937 1.036825126 0.3640134 1.657568 0.5960589 0.3592887  
0.849734421 0.719015133 1.193462284 1.107797 0.4787478 5.129275 0.308327  
1.82526 6.091406 0.3511397 0.8786093 0.6884841 0.4332918 0.5821289  
0.599478572 1.626836 4.55576 0.8152713 0.4777913 0.731674 0.1730137  
1.87141 0.4902427 0.4053396 0.332284 0.4380113 0.943045 0.7866095  
1.217843 1.76611 0.600611876 2.38917 1.291446 0.7890323 1.856681 1.264518  
0.9347595 0.5086997 3.770338958 0.2241445 1.128584 1.793942203  
0.3318913 2.860164 0.9742536 1.318564 0.9144944 0.751048373  
14.671065957 2.213085 0.554301 1.569746 1.309853856 0.962953112 1.102689592  
1.272347 0.8021966 0.8061849 1.023867 0.7348679 0.3312865 0.4908727  
0.655985432 6.67752279 1.995751 0.499904938 1.146827 8.351497607 8.904578  
0.7249982 0.5557123 0.5790606 1.048496 1.441111 1.845823 0.7386744  
1.024685 0.940209125 0.7794625 0.7991858 1.765197 2.367836 3.543749762  
0.7470728 0.07775384 0.9201379 0.652799613 0.9250062 3.853676  
1.539748 0.9021863 0.2886098 0.7511796 1.456987 0.445317581 1.201148408  
1.436511632 1.918116 1.113052497 0.901897642 3.529167 0.69129 0.521418112  
0.3798156 0.6138423 0.9521706 1.211145878 1.130993 2.661286 0.7649876  
1.568757133 2.469262 0.2808251 0.8206615 2.469661 0.9848661 1.861216  
0.2380859 3.12566 0.3012299 0.4291718 1.945005 1.191768706 0.03924061  
0.09443076 0.6044405 0.8637908 3.733868 1.362615 0.7011937 0.510339411  
0.369120143 1.094550636 0.5164696 1.140611 2.106939 0.7487799 0.751185

3.057228813 0.7293588 0.9812877 1.641357 0.5210154 1.234334 1.780109828  
0.08595373 0.8563612 0.423371 0.9608439 0.3445517 1.334719 0.8760982  
0.610225643 0.3172476 2.19003 1.872150549 0.6196571 0.2073486  
1.001697 0.6391345 1.616767 0.541236476 0.66915529 0.852391855 0.08189588  
0.336375 1.055943 0.5061441 1.033787 2.056651 1.870777102 0.5150146  
10.024642011 0.2461864 0.9760877 0.6670471 0.5788804 1.280904  
0.784608181 1.055093 1.108458 6.138485 0.4768855 2.617189 0.3836285  
1.046483 0.635076401 1.141877 0.804202576 7.001246 0.8538725 0.55615894  
1.644793 0.5371676 2.466287 0.581406781 0.4297642 0.6482283 0.261764  
1.917121255 1.353261 0.2562937 1.094496 1.125691 1.502026 0.7872663  
0.8874221

FGD5-AS1 41.3344 36.730965781 14.78554 22.056954945 13.908284439 22.549766428  
16.31791 29.554619706 19.9429 15.26096 17.820638047 25.58128 31.48487 22.23849  
22.20239 13.1653 14.50119 9.780682209 20.27874 19.8113 22.66217344 25.81191  
11.176992595 16.60727 12.83752 22.381616905 27.19885 10.90405 31.49241 17.13559  
36.29889 19.630821336 15.73256 12.722537827 22.61973 19.720521411 19.227050843  
14.982658109 22.03593 19.74071 20.715913141 18.568 23.184640698 65.33311  
22.624485888 30.32046 12.04898 5.86917 19.386177967 23.1655 23.22145 18.69629  
15.729976525 21.81212 17.914856619 15.11159 20.38176 17.37156 25.02374 26.74241  
16.6941 21.2653 9.25049699 23.58586 18.39772 17.42799 17.42429 23.00318 23.6015  
15.73029 18.76956 23.503663097 22.87607 20.87185 12.939920304 21.24436  
22.119293481 13.61479 33.46 29.03161 22.77661 19.2824 20.02456 24.045390709  
14.18528969 15.37765 21.08617 42.1526 18.492856751 27.62405 20.2193 19.91862  
14.139658868 21.6245 24.01431 6.874849309 32.64955 16.049923587 17.054851381  
17.99358 17.758486506 17.88308 18.46462 14.430837256 18.63992 18.10276  
19.683945465 17.39537 21.037541933 24.2683976 15.42258 19.800148394 19.08393  
12.84994 14.60001 12.08799 18.91854 35.947238428 15.76738 22.33259 16.21971  
30.76463 19.71891 12.36348 14.67388 50.50767 21.35016 21.37514 30.737  
16.962252933 20.800042444 23.85803 13.422198412 23.543265678 16.0998  
19.004403151 20.01027 36.25705 22.364857101 11.070033276 33.048692877  
23.076325815 46.42892 18.66614 13.97643 10.55697 14.99138 15.5692 21.574687667  
18.51201 19.61907 26.702147482 21.44573 24.49672 17.658927405 19.11891 22.83582  
16.668730638 21.26318 18.56957 15.172941825 16.87622 13.57927 16.53041  
19.458809845 19.20317 14.19612 23.933788814 13.62311 30.04698999 15.93992  
14.71246 16.100009732 16.14227 19.209393789 20.04326 21.88292 13.43621 21.2797  
24.50399 14.120133903 19.70739 19.37647 19.77311 20.26865 26.66799 12.92294  
27.07177 21.90312 27.176383433 32.875905072 17.06275 19.54669 21.63538 18.43984  
24.521791983 10.01849 20.034472222 18.67101 13.45001 25.709853389 26.783612342  
20.48445 18.72769 20.16930046 11.17187 23.35772 41.36333 24.73964 14.28312  
15.91432 23.45331 27.36297 10.43408 16.84791 26.05301 17.26804 29.31046  
25.338069038 14.66637 17.17544 23.188014488 11.42618 54.24967 23.56479 16.74416  
16.42768 10.74971202 15.75711 16.75775 13.29013 18.8976 19.54123 15.802748358  
13.5602 14.73048 19.78181 20.598397464 14.861118852 17.23612 24.25772 14.14446  
22.532409898 20.24548 17.16286 29.036988571 24.44534 14.93664 19.82242 20.62022

17.68065 16.48707 24.462822872 23.91448 15.051208913 19.09283 16.83563 20.6451  
18.8465 15.2567 19.68799 14.95776 40.48469304 21.84492 13.9228 13.52055335  
14.35376 16.14269 20.6814 21.98457 8.44165 30.17825 18.13919 11.18597  
21.173217948 20.10911 27.383177027 20.85754 23.6327 31.19628 21.335302745  
15.539257601 71.75602 14.39921 22.29228 2.00399 23.58995 19.969014347 19.91163  
30.79432 14.77476 26.434376406 31.5471 22.6513 17.404942054 38.2855  
18.822470343 14.96572 19.38961 19.215257897 15.41977 21.13519 7.25975251  
19.755282619 14.90195 20.97503 17.3993 16.73486 18.81531 21.62341 18.30202  
21.82303 20.93163 18.132542956 24.94093 19.54919414 27.47633 19.209670371  
32.45568 18.58861 14.475371479 14.43993 19.76996 15.97859 25.40622804 21.61426  
24.50415 16.877323854 20.760395542 40.10187 15.43373 18.78516 18.976017806  
15.762040064 16.698849993 17.10344 16.08421 31.75658 23.50912 20.13184 24.77406  
14.13061 25.11096 19.12718 17.31391 24.01563 27.017005448 17.4668 16.66935  
26.33589 19.12234 21.80374 22.79714 17.4066 21.99308 25.54819 19.6393  
19.222560249 17.62192 13.34006 21.24247 24.64514 21.782211517 4.191742 11.1809  
24.97623 24.94617 16.29411 16.46791 20.95751 18.048804301 16.86627 22.10118  
15.392090402 16.47157 18.26055 20.938 18.19433 14.96761 17.077218382  
10.067099715 25.9053 16.2517 43.17679 18.78722543 22.115732238 11.066836852  
13.32793 18.04367 19.05027 25.41824 21.16895 19.62738 16.93611 20.03562868  
16.950956281 28.95315 19.543436042 21.45457 13.907085054 21.24807 20.47058  
19.37241 19.93487 18.47895 43.50858 26.12301 11.26229 34.25329 20.481181789  
16.40309 18.97785 19.20502 16.94552 20.391205672 18.39893 19.17468 36.22532  
13.835509549 14.25243 11.81958 15.56691 32.32366 20.46415 21.56711 8.06787  
18.991744898 12.589245036 17.685191187 20.50702 21.961752635 19.239790457  
16.96405 32.75981 18.083446404 19.98618 19.70141 14.40069 22.494867287 16.5838  
30.3382 33.51251 15.691678371 38.22804 11.63003 24.78388 16.97528 19.41323  
26.09243 18.60593 18.09686 10.98694 28.63052 21.69346 21.656709072 33.9373  
24.56617 28.30865 21.52932 15.49111 19.51188 15.28534 15.521175297 17.936058526  
21.809060835 19.9186 25.08073 21.28409 14.08033 23.65168 28.469350725 31.06778  
13.75637 21.64472 25.5973 21.52 22.925475408 59.02068 9.188805 13.0203  
14.46274 50.47671 18.46082 13.87238 18.415261256 23.50271 31.9605 28.330970455  
25.62467 18.69566 24.37173 23.04222 11.10504 20.264114193 19.569173242 7.605107321  
55.09536 24.22813 21.41931 26.44658 22.54759 31.08124 18.262463883 18.28711  
10.244094723 33.07855 16.59513 45.33083 21.14596 43.76048 20.783865241 16.69909  
22.23822 28.3461 19.22893 7.974097 13.90677 19.15704 18.762502669 16.87525  
22.566773434 15.6641 10.49086 17.347495802 15.15125 25.83146 15.27719  
20.316997659 24.13796 19.04164 20.51417 14.994787943 13.68147 19.84197 23.63849  
25.2801 15.83419 25.81006 27.53307

AC008870.2 0.3396357 0.586807713 0.239246 0.796295376 0.636947369 0.345051411  
0.4870955 0.412287726 0.1558951 0.110744 0.309620745 0.9815866  
0.3044541 1.720181 0.7839953 0.7762593 0.2237863 0.247752174  
0.2459956 0.9808199 0.195138437 0.5431712 1.442602332 1.079618  
0.680693 0.190850478 0.4615409 0.1986814 0.1492123 0.7531759  
0.5319229 0.199026428 0.7305173 1.178324582 0.2973203 0.968417464

1.216095587 0.767024828 0.7027803 1.269179 0.659516105 0.741408 0.080041517  
0.8606009 0.361136526 0.5417017 0.9692045 0.9265348 0.215768858  
0.1238808 0.8726415 2.886403 1.052148676 0.1653121 0.32928492  
0.9914277 0.2032859 1.199524 0.04807342 0.4890486 0.09612161  
0.5497118 1.185343135 0.2405346 0.2681666 0.7563314 0.1254975  
0.5687532 1.758643 0.2866197 0.2483481 1.663797952 0.1090046  
0.03737793 0.414989965 0.2909842 0.391207861 0.7125223 0.2156484  
1.672969 0.05479008 0.1964302 0.6490944 0.223630539 1.319274921  
0.179798 0.1350944 0.6693255 0.420628667 0.340746 0.2006212 0.06601869  
1.591393959 0.6980296 0.742505 0.59285675 0.1005152 0.871162232  
0.1438947 0.1381327 0.186832444 0.1379486 0.5558572 0.128606856  
1.237684 0.4039284 0.100973767 0.6452824 1.264241963 0.460563361  
0.0734308 1.508949641 0.2412153 1.403943 1.548965 0.1371244 0.5097384  
0.931816747 0.3554571 1.318758 0.189447 0.07252923 0.1089075 0.6499184  
1.139501 0.3533663 1.292891 0.4901845 0.8690265 1.327209827 1.361411976  
0.3314875 1.165258032 0.666125688 0.1692122 0.701756014 0.5587374  
0.1214403 0.123419089 1.219831888 0.168965725 0.764543238 0.5910389  
0.5872486 0.6997629 0.8247938 1.298918 0.7292543 0.455920222  
0.733736 1.287176 1.546267034 1.125803 0.3418801 0.275606937 0.9250031  
0.2590856 0.648580161 0.332073 0.6771049 0.179767206 0.8122321  
0.8759927 0.1896655 0.977357837 0.3868226 0.4997237 0.090057105  
0.07962561 0.375554245 0.9708054 0.1808349 0.344021313 0.5338451  
2.339084322 0.6564157 2.777118 0.03012996 0.3476498 0.2368503  
1.008793786 0.2405375 0.1598855 1.581122 0.9100067 0.556487 0.0670743  
0.7384302 0.7772022 1.052688129 0.115927294 2.026516 0.2602571  
1.067293 0.3825557 0.737572824 1.09279 0.808915414 0.7756725 0.7508418  
0.175708649 0.821632342 0.1766345 0.4226217 0.453279354 0.4745622  
0.1671993 0.918681 0.9032679 0.5558289 0.8481578 0.7750602  
0.2363537 0.1062412 1.06436 2.26426 0.1381954 0.3024251 0.699477081  
1.355893 0.3911896 0.22626906 0.4556854 0.7389917 0.8739414  
0.7691882 0.2152023 1.460719607 1.445995 0.3373866 0.240265 0  
0.3477133 0.049863664 0.2456644 0.9977623 0.1867778 0.744509009  
0.097340177 0.7713283 0.2008414 1.015062 0.756093469 1.620238 0.6900339  
0.231388142 0.479932 0.79858 0.07937114 2.653196 0.1422549 0.446225  
0.994106636 0.3211675 0.089198968 0.4128122 1.685961 1.14064 0.1288042  
0.6944904 0.1926786 0.426773 0.786005471 1.479894 1.27839 0.221302288  
1.040269 0.04865375 0.5586933 0.4924409 0.6436794 0.5298653  
0.3653901 1.257251 0.681500139 0.07195969 0.28935057 0.9604468  
0.7350727 0.3506034 1.099453676 0.854298582 4.976835 0.6739243  
0.8198534 0.4543654 0.3336501 0.213301178 0.1294518 2.723887  
0.2161533 0.402457438 0.1142879 0.01721259 0.289433837 0.07966726  
0.344213672 0.1478815 0.9121186 0.65434847 0.5395972 0.4888409 0  
0.592619539 0.2677403 0.1673796 0.6723656 0.9094353 0.9009757  
1.113857 0.8962991 1.146522 0.04072336 0.39023762 0.08931716 0.274258437



0.6488941 0.1456688 0.7579717 0.08308897 0.370426482 0.664251  
0.09904567 0.2024901 0.258142686 0.2716642 0.1299989 0.029181476  
0.599342376 0.1079329 0.2747925 0.4042349 1.221976416 1.053754085  
1.784556257 0.1027589 0.1730307 0.1512586 0.1324319 0.1629359  
0.4804505 0.3794084 0.2488803 0.8096988 0.1146549 0.3889428  
0.3290107 0.435431 0.2378749 0.6935379 0.2832033 4.07102 0.5697286  
0.2756387 0.2054632 0.4494636 0.6000457 1.023067545 1.324369  
0.1918726 0.73801 0.1359797 1.648163449 0.1907264 2.163326 0.9679787  
0.1322739 1.002449 0.1282556 0.1245031 0.914834301 0.1476201  
0.1161373 0.092303056 0.2023903 0.583787 1.550023 0.4400664 0.647078  
0.269356109 0.898603513 0.709833 1.0371 1.600441 0.043133078 0.727458857  
0.672430068 0.4602429 0.3144772 0.2458094 0.4565656 0.8671298  
0.1652903 0.05051339 1.310248566 1.301608403 0.1503386 0.682558848  
3.398817 0.592942129 0.7505163 0.8526416 0.2356745 1.197879 1.347138  
0.4045732 1.642767 0.08845206 0.3497704 0.582791392 1.088077 0.2779958  
0.2600436 0.4398427 1.122063195 0.3354665 0.7254494 0.7411475  
0.192917193 0.3738293 0.1544142 0.1358127 0.1061025 1.051181  
0.2431327 0.5775145 1.099812658 1.836409794 0.968603239 0.07702802  
0.174535576 0.116794636 0.7055872 0.2731676 1.22272177 0.723073  
0.1837603 0.1412373 1.291438361 0.1638704 0.1735353 0.1291836  
0.122028383 0.10164 0.255103 0.05571985 0.3511769 0.2702611 1.125233  
0.4055221 0.2315857 0.9919408 1.09066 0.6186494 0.098935893  
0.2584362 1.06614 0.3265506 0.7198881 0.2364521 0.1621825  
0.1180743 0.108034183 0.133408657 0.137307468 0.07873695 0.5459299  
0.05484653 0.6724661 1.061793 1.101710979 0.2472396 1.176633 0.05583613  
0.1937066 0.1186751 0.046338704 0.5094773 1.141417 0.4135183  
0.5592981 0.7912328 2.197594 1.463388 0.663119811 0.1790891 0.7756769  
0.13257921 0.1206754 1.524903 0.6523265 0.9656629 0.3629975  
0.8911374 0.789590173 0.499533005 0.03371007 0.8246006 0.201576  
0.2213608 0.7137901 0.2438095 1.232082107 0.2941914 0.199127008  
0.05527393 0.3970515 0.6304956 0.9036049 0.1996676 1.252096029  
0.6080179 0.219683 0.2690694 0.256695 0.3688775 0.924899 0.6730541  
0.53622737 1.047915 0.245204996 0.2480589 0 0.95670881 2.397058  
0.6497912 0.1392241 0.548838917 0.1642643 0.5336489 1.243242  
0.285429113 0.2012498 0.1284298 0.09275364 0.1713258 0.4429366  
1.001626 0.3716901  
LINC00886 7.982836 0.831739337 0.6367208 0.831500374 1.094530248 0.519125772  
0.4320128 0.828458853 0.6766385 1.09782 0.037329471 0.7626686  
1.097489 1.116736 1.219114 1.017198 1.222209 0.921000233 1.499402 0.5117368  
0.949789453 0.3160033 0.515340934 1.078129 1.179725 0.594422838 1.3037  
0.3792726 0.119932 0.5717463 3.237743 1.234648025 0.6970453 0.642101148  
0.7840105 1.665674784 0.784380121 1.708921767 0.9756881 0.8221258  
0.752892409 0.6932923 1.213782898 8.353081 0.88763682 1.466891 0.7853487  
5.194643 0.64361069 2.218229 0.251785 0.8724776 0.558843205 1.170544

1.240021262 1.394536 0.9510407 0.5581856 0.2221792 0.530348 1.480806  
2.854051 0.370510186 0.7411134 0.7861005 1.636693 0.2689889 0.6961078  
1.082888 0.5221847 0.8317257 0.920673221 0.4797929 3.85554 0.54058997  
0.4301309 0.022927933 1.949625 1.093912 2.976502 0.5504812 0.7367933  
0.2911932 0.391756272 0.589105843 1.091897 0.4234796 0.7445985  
0.480001084 0.7740105 1.225521 1.644974 1.194725205 1.483879 0.7684307  
0.614458818 0.7109594 0.061422108 0.698231063 0.9569435 0.696242154  
0.3326359 0.6932793 0.870031104 0.926063 1.57627 0.508599213 0.7152723  
1.424770124 0.329054165 2.026398 0.345323902 1.29254 0.9987376 0.5986925  
0.2414258 0.6414671 1.416645401 1.238055 2.177328 0.6960978 2.110339  
1.743432 2.124359 0.9315505 3.89429 0.4983842 0.8573027 2.889231  
1.248049232 0.838620084 0.7266517 0.194387999 0.61376301 1.310959  
1.390180857 1.120323 1.729088 0.269257883 0.528854949 0.206947331 1.052869256  
5.169749 1.156641 2.838482 1.517004 0.9355579 0.2090151 0.418804491  
0.5111195 0.5526124 0.493480365 0.8279988 0.6474988 0.68011737  
0.1775493 1.110638 1.168115534 0.4995999 2.311536 0.855831701 0.2377649  
0.4148154 1.422839 0.727378354 0.941383 1.643582 0.6514649 1.12458  
1.583432436 0.4776394 1.431959 2.45175043 0.6842206 0.475242529 1.29389  
0.7725331 0.4278422 1.385505 0.7022634 0.196982714 0.3737834 1.39934  
0.7919821 0.8901949 4.758629 1.725189 1.884446 1.103176 1.494385173  
3.742674159 0.1614173 0.4137239 0.2806565 1.434934 1.030176089  
0.4757727 0.584219755 1.170579 1.061332 0.661837533 0.370012191 0.5158356  
0.9530181 1.394174387 0.6967597 1.94661 1.028494 0.4022069 0.6248128  
1.376068 1.353473 0.2722953 0.5724509 0.2401398 0.7004008 0.4854477  
1.09599 0.992851399 1.068027 0.98258 0.57086267 0.6278832 2.771896  
0.4784776 1.389738 0.3999992 1.191868261 2.879938 1.431833 2.864572  
2.515409 1.81973 1.010876407 0.5100976 1.432088 0.7159853 0.455933154  
1.577817537 2.248543 0.57756 1.022036 0.621856583 0.7620836 0.6676065  
1.33080672 0.7953195 0.8508547 0.5528983 0.4442818 0.9909457  
0.1684621 0.594516939 0.634038 0.537714344 1.119842 1.88302 1.498631  
1.107182 0.7872177 1.784218 0.7296115 0.46181709 0.3728959 1.202278  
0.723360864 0.9948449 0.9646224 0.6803934 0.7282869 0.8080806  
1.190304 0.9642781 1.950573 0.907576016 1.445972 0.422503313 1.760647  
1.787632 1.319781 1.043985194 0.512268348 7.197672 0.3775335 1.313461  
0.3408573 0.2844303 0.342889178 1.12247 2.508013 0.7404507 0.862619396  
0.5128899 0.9177167 0.775458526 0.7214493 1.775285167 0.4898571  
1.141831 0.535962122 0.6720564 0.7119477 1.15016692 1.57642025  
0.5818398 0.8744731 0.5747385 0.902643 0.6525119 1.091509 0.8141289  
1.151922 0.665553 1.090992622 1.29701 1.085871419 2.245192 0.659138826  
1.010876 1.540489 0.904661897 0.7596188 0.6324549 0.6238941 0.53201729  
0.820044 0.648702 0.555104673 0.788923452 3.581657 1.346251 0.9773743  
0.678514362 1.620751675 1.106666417 0.7571142 0.9117234 0.6349009  
0.4494322 0.4268412 1.309762 0.3582025 1.875393 2.379071 1.078565  
0.9862404 1.084915533 0.5232104 0.4078851 1.669333 0.9442416

1.624948 0.3052863 0.2690244 0.6015986 1.612917 0.572137 1.810876332  
0.568949 0.7903827 1.619144 0.7874921 0.289480327 1.181685 0.4755723  
0.3002923 0.5985279 0.9255633 1.185508 0.6004292 1.059202635  
2.438964 1.051022 1.805295153 0.9380912 0.6777754 0.7243361 0.4205232  
0.7668146 1.295718081 0.293804113 1.212928 1.61716 2.410302 1.328977311  
1.649176139 2.155904866 0.6250514 0.7582998 0.9395725 0.4328395  
1.25887 2.178822 1.294722 1.057879279 0.630682362 0.4948576 1.328517902  
4.654279 1.134732638 1.01943 0.3712181 1.604563 1.231358 1.368855 2.033125  
1.316002 0.5509855 0.4520196 1.244264196 1.188506 2.120236 1.258186  
1.226647 1.617368076 1.225623 2.561035 0.744638 0.539020185 0.497077 0.4513204  
0.6671003 0.8907209 2.098761 0.8751516 0.7557925 1.173488909  
0.954594372 1.038042613 0.7842266 0.397477146 1.113098197 0.6060487  
1.488151 0.683069882 1.840412 1.227322 0.4313835 0.488478302 1.301172  
1.092609 0.9820929 0.277900326 1.405154 1.512196 0.3918759 0.450633  
2.213648 0.8274532 0.6011885 0.1620117 1.0768 0.1769737 0.5687504  
1.5285794 10.8085 0.8093218 1.299855 1.030231 0.8763535 1.394096  
0.9701331 0.910152972 1.465470708 0.965678897 0.675053 1.03557 0.8082042  
0.7131683 0.9347148 0.900787237 1.528276 2.296123 0.6283098 0.5782962  
1.295676 0.533852906 0.803836 1.164781 1.5669 0.6893034 6.899645 0.7414329  
0.604915 0.742961695 1.103586 1.027873 0.417371285 0.352709 0.6341765  
0.5408069 1.39644 2.929814 0.541792026 0.841276317 0.48435943 3.748151  
1.444283 0.9316166 0.3802661 0.7600582 0.990718 0.353681341 0.8299336  
0.60464032 0.5874289 1.458913 5.280237 1.200531 0.2674773 1.501604189  
0.8688092 0.6746036 1.811255 0.8819301 0.3908301 0.6164813  
1.521954 0.865596123 0.5573915 1.182527074 0.5473223 1.795063 0.904457076  
4.073967 0.9720233 1.896149 1.740618117 0.4705697 1.765021 1.572196  
0.521815061 0.5892616 0.496476 1.065034 0.9931532 0.8653218 0.7261456  
2.190852  
AC003070.1 0.1383676 1.39968986 0.2144314 2.516263008 1.919348835  
0.624472778 0.978528 1.492313628 0.1397257 0 0.520325453 2.576488  
0.6201731 2.446068 1.481138 2.846233 0.6942989 0.659226792 0.3100514  
0.6169048 0.874493475 0.6954765 2.154959575 2.481935 1.477565 1.229461284  
1.861515 0.4451855 0.3343401 1.44655 0.3724624 0.789003608 1.952758  
2.774523274 0.9116499 3.08076939 1.278350797 2.864454498 1.109462  
1.403925 2.152415607 3.061954 0.179349044 0.3798262 1.090659107 1.560589  
2.171697 0.9995973 0.128926221 0.2313165 1.865082 3.913705 2.72979447  
1.587492 0.491885861 2.776865 0.4555028 1.131694 0.2154363 1.721989  
0.3769145 2.62993 1.825999053 0.4042245 0.2120757 2.737612 0.1687214  
1.853681 1.486364 0.2997067 0.6677683 5.068229194 0.2093542 0.1256291  
1.571156455 0.8093896 0.356110438 1.358765 0.2254949 0.4685778  
0.4296885 0.7152296 3.923568 0.269817153 1.037227931 0.5371646  
0.7264946 4.923118 1.919913002 0.4979411 0.5694071 0.2366849  
3.045818926 2.025605 2.022575 0.804040203 1.576571 2.260226047 0.358249872  
0.5748117 0.266404408 0.2649442 0.4724346 0.432254117 4.768685

0.5115683 0.633505439 1.956197 3.911944287 0.938167657 0.3290728  
4.860336698 0.6949172 1.518669 1.706935 0.8778703 1.211394 3.398942771  
0.4778837 2.550847 0.394173 0.130013 0.427051 2.737792 2.094999 0.5806444  
1.41893 1.617025 4.86807 1.224538556 2.21618692 0.8440502 3.300690436  
1.747420067 0.2843654 3.14484971 0.6461744 0.1166192 0 3.379325005  
0.35155857 3.152126449 0.9737802 1.209158 1.599318 2.747199 3.742054  
2.736068 3.560937883 1.117976 3.613906 2.343781773 4.451626 1.373608 0.58504976  
3.402866 0.3756391 0.847742997 1.316442 0.7341237 0.526744237 3.201797  
3.332258 0.5464073 2.120443191 1.191786 4.09281 0.369950122 0.1019526  
0.575766223 2.373037 0.6753278 1.002103222 1.131528 3.97456662 2.784073  
4.853102 0.3713171 0.3894895 0.1415228 1.455853719 0.3593149  
0.2985463 2.1565 2.892609 0.5715053 0.1803521 1.902791 2.519584  
1.901088957 0.043293052 4.540814 0.5831581 2.214337 0.7669619 2.546752151  
1.530385 2.232835366 1.667109 0.8121986 0.416869844 1.527664658 0.316628  
0.3945702 1.787567139 0.3402726 0.5789945 0.5146222 2.137978  
2.788716 2.146824 2.263883 0.5825575 0.2645052 2.635955 4.058823 0.3440606  
0.2139928 1.100457634 3.706543 1.64351 0.507001133 0.5469935 0.5759509  
2.000811 0.6186995 0.5123415 1.636517372 2.225089 0.6047858 2.826399 0  
0.8830041 0.335188566 0.1834868 1.117843 0.7726395 2.144856214  
0.436220311 2.218435 0.480027 1.614126 1.418382253 1.815234 2.805992 1.002378156  
1.63299 1.248404 0.1778469 1.672036 0.3541673 0.9089604 4.216329739  
0.8711432 0.049967037 0.4162448 5.14318 2.35923 0.3607646 1.197035  
0.7015693 1.047344 1.39042313 3.789712 2.046064 0.132232556 0.6151065  
0.1635277 2.162311 0.9930712 1.112626 1.73524 0.9006027 2.882638  
1.57195038 0.1612401 0.68076528 1.076037 1.932149 0.3142388 3.296804329  
2.005380687 1.93446 1.876138 3.524129 0 0.5776985 0.238971998 0.158216  
6.27534 0.5189301 1.060925258 0.1920636 0.1928413 0.943322853  
0.1071063 0.53025476 0.3614816 2.219973 1.801329904 2.091374 1.263861 0  
1.754702181 0.2666337 0.4688094 2.51095 2.639841 2.144992 4.171098  
1.518499 1.509295 0.3649953 2.167004983 0.1601064 0.546249725 0.8723863  
0.725333581 1.283226 0.1861775 0.861938341 0.7260426 0.2589203  
0.4537196 0.667408124 0.6492993 0.2184664 0.326934703 1.459724558  
0.2072959 0.9089311 0.640666 2.698400462 2.47774686 2.201507013  
0.4605038 0.344631 0.1129751 0.3461969 0.4462218 0.5651864  
0.6072432 0.9410615 1.632863 0.228362 0.622503 0.850631941 1.005236  
0.8528101 1.60414 0.7403361 4.095563 1.914886 0.7058557 0.5919191  
1.49541 1.067709 3.795592702 1.330265 1.074823 2.24648 0.773443 2.544094361  
1.335502 4.681642 2.910959 0.2963861 2.246187 0.2155367 0.5072255  
0.36604811 0.4961587 0.2313145 0.738655281 0.8616424 3.226626  
1.817339 0.2958171 1.589322 0.630980216 1.467466894 1.519833 3.718128  
1.982382 0.483241488 2.63310474 2.008952268 1.422436 1.056974 1.432041  
0.7475963 1.626679 0.370366 0.5281984 5.951096451 2.29597929 0.1924936  
3.283732721 5.641282 1.012270901 1.40792 2.149328 0.5591392 3.231862  
1.833479 0.7595228 1.545998 0.04954864 0.7376288 3.142227548 2.81314

0.2906892 0.9597077 0.8063637 2.262786521 0.5694544 1.147422  
2.368924 0.957168394 0.6204736 0.9750792 0.6086312 0.19812 1.968196  
0.7105924 0.4977065 3.372269056 3.48179093 3.43218059 0.103558  
1.212353898 0.186929834 1.62751 0.2550361 3.235240172 2.517863 0.3529301  
0.1582352 2.468178246 0.2336628 0.2430253 0.2170963 0.364572033  
1.002077 0.5358838 0.4994059 1.201031 0.4758082 2.789533 0.7572113  
0.4900857 2.145999 2.788044 1.875458 0.443371356 0.608032 0.5474564  
0.4878013 1.376997 0.9418992 0.3634023 0.1175863 0 0.398571742  
0.346122983 0.3175666 1.076473 0.1843419 2.071843 2.928198 3.149598247  
0.3165656 1.69207 0.3002688 0.620055 0.9307035 0.103831144 2.600279  
3.573079 1.164832 2.792889 0.7359272 4.772169 2.248466 1.846059423 0.5016063  
2.301754 0.779809444 0.294979 1.019956 1.847769 2.330204 1.491176 2.49596471  
3.373889758 0.639602122 0.1133012 3.502324 0.5645892 0.4960032 1.88646  
0.7587556 0.907095898 0.7367471 0.099151985 0.0825682 1.270962  
0.6835894 1.9415 0.139811 2.315710096 0.8433818 0.4165139 1.0174  
1.657862 0.1127105 3.942655 1.508112 2.252858973 1.657457 0.412073165  
0.1307825 0.5414359 1.623085357 4.141068 1.172879 0.8318921 1.372781561  
0.1698771 3.381078 1.708582 0.677182316 1.030721 0.1644415 0.1484522  
0.2442934 1.695501 3.069469 1.608255  
ASMTL-AS1 2.285423 2.090813535 0.7340462 3.821361328 6.570355188 3.043689452  
1.455839 0.717625332 0.09566237 0.1415754 0.118745934 6.432065 0.8385809  
6.635311 17.87562 11.19395 1.095941 1.555920771 0.2004818 0.9371119  
0.636136686 3.452116 9.934229122 2.86075 1.892683 3.49506553 0.4652846  
0.2857441 0.6231276 3.631363 0.8542642 1.092116669 2.241348  
13.205014515 0.8042007 5.850823045 7.17446351 3.73647282 2.817821  
4.251414 1.649595728 6.222143 0.196464451 13.38236 1.144157669 3.116307  
8.304543 4.316786 0.220671471 0.3325759 2.687706 8.969497 4.629868979  
1.612187 0.673533599 6.020355 0.4557915 5.133103 0.2212458 2.697295  
0.1658908 5.572639 17.085515236 0.3843749 0.1572961 2.499053 0.2984114  
4.134528 2.780734 0.3371019 0.5714796 5.797124804 0.1791664 0.1146816  
2.063555423 0.5541439 0.421977018 2.848954 0.5623981 50.04621 0.2941838  
0.2448389 2.975714 0.422237137 4.580351926 0.1225889 0.3315935  
2.544679 1.30250768 0.7159163 1.056675 0.4557515 10.032338245 2.080228  
3.059838 1.663411361 0.2621375 7.315221216 0.478283706 0.1362259  
0.377812479 0.3325529 0.9409442 1.10977602 5.140406 0.7813097  
0.37176499 2.212754 6.218558266 1.209685792 0.1577085 9.826069071  
0.6211455 10.1623 10.86838 0.4357459 1.37439 3.257893011 5.453005  
10.78113 0.114175 0.1668987 0.4907774 4.327103 8.112924 2.041883 1.062537  
6.339638 12.93769 12.675404536 2.133144604 0.5432016 10.067908445 4.149877235  
0.4759067 4.306206195 1.672823 0.1330711 0.148763255 11.210923734  
0.212920319 3.459973353 4.426841 1.180893 3.317096 3.231649 7.556533 3.876551  
1.868448398 1.800978 5.864423 5.093040464 2.590613 2.043633 0.166896218  
2.573317 0.5026684 2.432162108 1.802589 1.759147 0.519734907 1.915196  
7.672417 0.2701794 2.998694905 3.943755 4.903708 0.172693775 0.1047019

1.121939621 14.62217 0.8938946 1.636046827 1.626858 11.721937073 11.3287  
23.6968 0.5199956 1.455529 0.8841464 6.08537097 0.4674055 0.7256128  
11.24464 6.736634 2.774515 0.1131872 6.088869 3.805188 5.64013458 0.08892101  
20.75362 0.8384373 9.930017 1.837836 4.052986894 3.387787 9.693742338  
4.237663 9.512719 0.245767585 3.888627622 0.4200064 0.7563925 2.04438156  
1.004664 0.6995386 3.032581 2.312732 5.514663 9.071864 2.282467 0.3444567  
0.4165114 4.411467 10.29437 0.04711181 0.2808088 4.326468361 8.247405  
5.832389 0.824399033 2.958518 4.772932 3.555765 1.694356 0.7840778 5.054676716  
15.32748 0.4968757 4.991272 0.09753612 1.635824 0.44622065 0.2512463  
6.122598 0.319594 3.79935757 0.26132374 3.691131 0.6470252 2.875776  
6.352528604 3.410766 9.017438 1.443538467 1.104383 4.971576 0.1095857  
1.664127 0.2667265 1.229071 6.835453825 1.037258 0.359201238 1.132002  
10.22097 2.89396 0.5433898 8.277382 1.154628 1.574409 5.256852518 5.500021  
4.922901 0.237647161 4.078303 0.1492777 1.129789 2.137909 6.460792 0.5627472  
1.163117 11.97605 3.951289463 0.3725733 0.443887616 8.704719 4.89015  
1.223619 4.613490745 10.406505546 0.7401154 2.69429 8.521713 0.1394068  
0.8375674 0.490832374 0.2888578 3.943249 0.2131695 2.487770393  
0.350654 0.07921661 1.110038385 0.07332968 0.676566799 0.577468 2.472839  
3.986617176 3.389451 2.451669 0.86653617 4.626808088 0.1597306 0.8880105  
10.03222 4.312278 6.943249 7.127591 5.575444 2.858147 0.3592197 3.526868601  
0.2329338 0.245428774 12.58542 0.819382452 2.286822 0.1529584 4.010637719  
2.771226 0.1772683 0.3417001 1.188036453 0.5417819 0.1246431  
0.212642249 4.277397521 1.407412 0.9434786 0.4613159 7.770133007  
2.754114712 15.810734371 0.4729218 0.5603803 0.01933693 0.2370217  
0.2499571 0.4330173 0.4573201 0.3221461 3.767839 0.2442917  
0.2770255 0.621205568 1.346095 0.9974471 4.38448 0.8568462 4.811415  
1.019679 0.6644826 0.5515957 4.450501 2.910466 10.162960901 7.653873  
0.5519033 2.136166 0.4813939 12.445437898 2.212711 46.83082 2.344672  
0.2480121 9.58192 0.3074291 0.1302259 1.91718726 0.3679999  
0.3365322 0.586630618 0.2483867 2.806143 4.410106 0.5175752 2.911198  
2.441721845 7.243133347 1.524519 2.338765 11.88717 0.148881816 5.193607733  
2.527329671 2.179018 1.085476 1.87289 2.640004 5.320994 0.481781 0.5166114  
8.977225282 8.624366626 0.4777374 4.5887684 10.23502 0.931279751  
3.079202 2.812248 1.244137 3.637789 4.975197 3.723892 3.565998 0.2713855  
0.8206466 4.609945391 8.131999 0.1137249 0.6570583 1.012132 3.993502757  
0.3742787 1.096533 1.772353 1.934250331 0.7858868 0.4845355 0.5382321  
0.2170267 4.815706 0.5351533 3.986797 6.719212899 8.535887147 9.226508997  
0.2836016 0.977294633 0.179172595 2.785663 0.0349218 9.708034754  
3.312771 0.513467 0.4875067 3.598159527 0.2742443 0.4991576 0.1857922  
0.452403853 0.7328438 0.8316167 0.3098608 0.8931648 0.2961448  
1.597653 1.244209 0.5131701 23.66535 4.312516 5.163998 0.480623406 5.292774  
3.731091 1.300099 2.303011 1.027755 0.3939354 0.07044168 0.211770377  
0.284249822 0.250136152 0.2053413 3.467256 0.2524173 1.848316 3.8037  
4.137868785 0.3386481 12.99907 0.1970116 0.1910327 2.048145 0.124402932

3.636519 22.99511 1.73999 2.782402 6.99662 5.816516 4.746481 4.562348593  
0.2403953 2.797996 0.889820015 0.1514667 4.504078 3.521411 4.463212  
2.169465 2.865606226 6.718469485 0.583866506 0.1163566 4.521922 0.3285613  
0.4993908 1.207322 0.6545418 3.739728471 1.115011 1.527386188 0.1413246  
2.857015 2.69889 4.149118 0.5743248 5.442319021 1.332499 0.2203539  
1.148029 1.285612 2.855165 7.561545 4.30561 2.08739056 6.075739 0.423185251  
0.6267763 0.1516463 3.207907603 20.25313 2.810516 0.9255189 2.290925633  
0.3101477 3.161727 5.162249 0.656807667 0.9813325 0.3096058 0.6199854  
0.2747746 3.666475 2.869783 0.7275007  
ARHGAP27P1-BPTFP1-KPNA2P3 0.1665148 2.488346836 0.4462146 2.408739411  
1.325167475 0.836496742 1.143615 1.015530207 0.1681491 0.3235076  
0.605299384 1.129642 0.7090142 1.800759 1.269467 2.897167 1.085036 0.485392015  
0.27466 0.9105971 0.526192914 1.637289 4.322214288 2.093609 0.9392577  
1.294617066 1.413453 0.3683258 0.363235 1.154497 0.6107133 1.037231365  
1.200916 1.905072679 0.8597472 2.204332517 2.176022272 2.435684536  
2.218075 2.079405 1.734899049 2.548019 0.205041178 0.7515643 1.455420409  
1.167259 3.521811 2.394311 0.513943711 0.1948602 3.022812 3.771866 2.463823712  
1.217896 0.499455204 2.575928 0.6219539 1.766224 0.2147005 1.813247  
0.1943947 1.902958 1.831208179 0.506722 0.2658508 1.77145 0.2030432  
1.450867 1.887521 0.2254213 0.7701243 6.854297468 0.1574636 0.1637837  
0.848915479 0.8489014 0.745844611 1.716928 0.1696036 0.7753589  
0.5170972 0.6372668 1.745202 0.446468344 1.872336397 0.2020114  
0.3278552 1.9765 1.102723388 0.7390552 0.6762214 0.6141694  
2.179130635 1.492681 1.280802 1.362003186 0.7318087 6.089110383 0.6143549  
0.3525222 0.652644448 0.332125 0.3424154 1.072880899 2.223256 0.3729317  
0.394801448 1.552363 2.705589036 1.110195942 0.1881066 2.447697113  
0.9291995 2.110445 2.670414 0.6272669 1.509884 1.745710177 2.563971  
2.955773 0.6066295 0.2884744 0.5001573 1.016457 2.097693 0.3493805  
0.6759144 1.854175 3.781298 3.736725526 2.561114962 0.6957885 5.995245119  
2.688846462 0.2804237 3.254170049 1.063154 0.1344946 0.380343902  
4.171417691 0.187128786 1.644125319 0.6445284 0.7917611 0.9953494  
1.743186 4.128002 1.977875 3.323754033 0.9892636 2.519527 2.690263924  
2.626511 1.712637 0.391145842 1.335557 1.181502 1.305605005 1.532577 0.7583046  
0.577964265 1.353661 2.643656 0.3835763 2.441980085 1.629799 2.340719  
0.733579054 0.1648676 1.652277324 1.267247 0.5079408 0.59138147  
0.7051699 2.844885 1.912267 4.496701 0.218348 0.8104963 0.2767567  
1.13534748 0.6378018 0.1526929 5.619033 2.168512 0.2266491 0.1627799  
2.73788 2.842618 2.801513902 0.195374504 3.913779 0.7602683 2.364997  
0.6650884 2.579829286 1.16641 2.971556881 1.792808 0.8552414 0.379736989  
2.893165963 0.5298803 0.2255466 1.454504514 0.8701703 0.7838724  
1.056142 2.165518 1.205556 1.635888 1.128951 0.3983314 0.2069026 2.335069  
3.406649 0.1811471 0.2306985 1.961392795 1.722975 2.249791 0.902494281  
0.7844321 0.4295855 2.785646 0.8575706 0.276547 2.210006085 2.548535  
0.7141668 1.255262 0.01428689 0.640702 0.302530299 0.4071226 1.145054

0.8232714 2.478742574 0.311693627 2.176905 0.347508 1.843145 2.376641033  
1.389581 1.541956 1.258280287 1.54578 2.021923 0.1230645 1.048004 0.3889195  
0.7520316 2.638734665 1.059749 0.187910927 0.8940007 4.655761 2.987025  
0.3328503 1.989745 0.7509265 1.301498 1.515236769 2.832578 3.842917  
0.124321672 1.767795 0.2213922 1.369566 0.8398792 1.320363 0.4945803  
1.391706 3.370481 2.337627555 0.2061676 0.931407866 1.235293 2.029779  
0.803595 1.896528852 2.235065126 1.557689 2.546895 2.492726 0.4288205  
0.9814812 0.273205248 0.3689016 5.457017 0.2445929 1.843296523  
0.6259875 0.07542266 1.024355698 0.118153 0.507596199 0.2945417  
2.454237 1.985014976 1.022453 1.250567 4.95020907 2.20439086 0.2005458  
0.3761174 1.564827 1.35852 1.812628 3.476687 1.554761 1.473345 0.6245499  
2.642137776 0.156549 0.626555447 0.3999428 0.360064376 1.635103 0.2968667  
0.974847997 0.786363 0.2559495 0.3003092 0.495290935 0.3418546  
0.3614979 0.236064504 1.888416542 0.2182816 0.5910205 0.5915373  
2.859311255 1.433884572 3.609056499 0.2944086 0.2721711 0.5268327  
0.513337 0.4515629 0.5546531 0.4080136 0.4509009 2.347114 0.1846421  
0.5618509 0.469182221 1.2542 0.9461125 2.247175 0.8803313 4.606651  
0.9921803 0.48113 0.6035012 0.7942164 0.9517822 1.955972563  
3.263316 0.5173866 2.116777 0.8637914 2.950515177 0.7955511 5.141646  
1.811661 0.2922777 3.81555 0.1675175 0.5150309 0.770893947 0.2031761  
0.4001558 0.43556834 0.4775292 3.030312 2.587983 0.2917166 1.254113  
0.590136361 2.643842115 1.488723 1.566069 0.6701251 0.225348327 2.081057163  
2.379844666 0.5937782 0.7472922 1.231755 1.118675 2.630503 0.2897096  
0.2894461 3.198887377 2.856380762 0.2533686 2.138259714 5.657375  
0.494889847 1.276626 2.162645 0.4672786 2.785133 2.445259 0.4422713  
2.109663 0.3428609 0.4022299 1.909130984 3.968439 0.6496696 0.5362196  
0.5391094 2.095266498 0.4865592 0.8198705 3.548829 1.017183252  
0.9800338 0.250774 0.5188123 0.3159094 2.00455 0.8693959 1.407536  
3.394896577 4.819636698 3.773514624 0.2180922 1.288368994 0.230579611  
1.524897 0.8133284 1.968603801 1.906958 0.4512696 0.3808479 2.304514568  
0.2912379 0.2120352 0.2449301 0.445589707 0.294629 0.5642831  
0.3803182 0.9282625 0.3839014 1.630077 0.578641 0.5550875 4.709687  
1.589577 2.44505 0.400172567 0.4442585 0.8983933 0.623721 1.45589  
0.6287402 0.5056591 0.3979859 0.084966976 0.329759735 0.740502159  
0.2547781 1.965261 0.637794 2.61608 3.68511 2.439365327 0.4642979  
2.125068 0.3764068 0.2984755 1.235033 0.355334577 1.535997 4.865707  
0.669034 1.648196 0.8504079 2.839463 2.318299 1.666193199 0.3420653  
2.981974 0.916097028 0.2070743 1.365525 3.040922 1.977978 0.7086298  
2.062157019 2.667612454 0.432963056 0.08521835 3.190123 0.4713614  
0.4871772 0.9562023 0.4291589 1.690824989 0.8341214 0.231186005  
0.2484112 1.784423 0.6375518 1.10564 0.1598392 1.982900796 1.522418  
0.8429989 2.085952 1.313108 0.5086443 3.908281 1.796749 1.961060096  
3.345148 0.516560886 0.05410167 0.1925113 1.953258744 4.995793 0.7726579  
0.5005592 0.967990619 0.4514586 2.12127 1.737668 0.605543451 0.5668988



0.4761794 0.1473869 0.2572399 0.8335801 1.633446 0.5356941  
AC004918.3 0.8203328 1.906925543 1.995217 4.384999426 1.094148546 2.115588395  
0.7809508 2.42250325 0.9319324 1.144235 0.993999745 0.9469317  
3.584869 6.408659 1.820897 2.171787 1.505482 0.959939235 2.382833 2.000147  
1.296141139 2.095978 1.313088701 2.654202 0.871287 2.297633429 3.897729  
0.8797829 1.0278 1.608016 1.140903 1.813465919 3.873259 1.437091785  
2.996921 5.188261824 1.795000909 1.728028015 2.475444 1.902995 2.349024317  
5.761404 0.850637973 0.8949685 1.807736566 2.612885 0.9944281 0.3039108  
1.226158047 1.782812 5.662467 1.999127 1.696049697 1.620901 1.154336468  
1.966421 1.090593 1.834607 1.184113 1.005439 0.8246714 1.249986 1.230193957  
1.797379 1.082694 5.066613 2.514617 1.831637 6.626174 1.523019 2.996716 6.308101397  
0.9481294 1.365486 1.48910621 2.910254 0.825554318 3.809646 3.039811  
1.012825 1.971258 3.098714 2.924393 3.599214974 0.973648662 0.3096198  
0.8225424 1.755756 2.379975104 3.017721 1.673101 0.833163 3.688593132  
3.280968 2.788262 0.811749919 3.427209 1.116673842 1.044269331 1.354404  
0.902524646 1.265335 0.6790057 0.640670697 6.098835 3.732811 2.146189238  
2.913407 6.464588194 2.672881915 1.36567 3.062488064 1.430528 0.9646774  
1.208756 1.431261 2.616273 3.238575664 2.151137 1.534768 1.483041 0.9153268  
1.612538 2.417443 1.180596 2.477511 1.285218 2.848899 1.705427 1.670919895  
4.933563278 1.617985 1.411667619 4.154727347 1.389308 5.838242207 1.197169  
0.9026534 2.166533954 1.473149311 1.897217619 4.925873561 1.789692  
3.092368 2.602846 1.135167 1.998173 2.778629 2.206329975 2.32308 5.339226  
2.215218044 3.079081 2.610142 2.280253403 3.331832 4.487808 1.236548266  
1.555289 0.7253936 2.43401059 5.128558 1.465898 1.409764 3.125666672  
1.837791 2.11745 1.611746336 2.317025 2.800833345 0.4689634 1.223378  
1.237732898 1.836833 4.164665881 1.167862 2.912537 1.300832 1.250788 0.4020395  
2.195667634 1.491176 1.504479 4.604169 4.521595 0.7957263 0.460369 5.701799  
4.503285 4.035256369 0.748618777 2.000877 1.690255 2.494325 1.069894 4.443972666  
0.8821083 3.15368649 3.732675 0.5159186 1.373041575 5.747703295  
2.483348 1.520524 2.007169982 0.8405652 0.6225894 1.543668 3.774429 2.274  
8.433015 2.390178 1.072765 0.7710111 2.149835 2.757257 0.9349148 1.550619  
4.415385724 3.677475 1.407437 1.50291579 0.7206516 2.039281 3.133783  
0.6550093 1.176284 0.992284415 1.542897 2.509894 1.219074 0.1642297  
1.385741 1.048808043 1.065166 1.209745 1.813197 2.253911709 1.293098477 4.56253  
2.015854 3.280482 4.360268902 3.288353 1.414604 2.168761447 2.007124 1.500829  
1.441002 1.116732 1.172351 1.549311 3.674893658 2.039683 1.629303529 3.187535  
4.025138 2.646854 2.483438 1.389789 1.546428 1.169874 0.961721858 2.808484  
2.570488 1.371930638 2.463156 1.198408 1.911692 2.954688 0.7940071 4.62492  
1.334839 4.919891 2.174559682 0.9559358 1.809801793 2.462241 4.553844  
1.649542 2.631137725 0.630487746 9.894595 2.69031 4.056416 0.5029948  
2.249736 1.29871593 2.058404 19.66391 1.811749 1.04830885 1.107048 2.477125  
1.529234699 1.217075 3.310405221 0.431596 5.919165 3.66330043 1.953492  
2.955567 0.50024899 1.944707331 2.700495 1.466909 1.931706 3.66098 2.119484  
2.618163 2.274863 1.015385 1.46516 2.253931784 1.542473 2.260218962 0.9235842

0.734625692 4.456528 0.95661 1.277532395 0.6277325 0.7127005 1.165642  
1.472819412 1.784389 1.672981 1.566777129 5.480989549 0.9558768 1.187839  
1.779081 1.940917839 3.485201097 1.442818882 0.6825413 1.766513 0.9488683  
1.417188 1.803745 1.755177 1.280047 0.878211 4.95985 2.270566 1.783791 1.765084267  
1.738243 1.246447 2.786245 1.637238 23.31543 5.150757 3.825142 2.274534 5.684341  
1.738816 5.031552254 2.199169 1.141694 2.867197 1.435855 1.09473689 0.7389873  
1.166727 3.412132 1.334147 4.029202 0.7986509 1.866946 1.428695668 1.1167  
1.957077 1.357560567 1.075447 2.498903 5.147751 1.315347 2.17655 1.856876161  
0.876753822 3.789323 8.748505 2.013831 1.551858206 2.994125879 1.116597389  
1.2474 2.141029 2.666753 0.8553438 2.120789 3.879194 1.211593 1.920906707  
0.613155609 0.8321446 4.311427999 26.94195 0.843946665 2.801676 2.052977  
2.532246 4.492451 3.523929 1.997274 2.38235 1.003668 1.662705 1.995981761  
3.397394 1.641328 1.608715 1.85914 8.96835392 2.74589 3.28323 5.55024  
1.022058903 1.241517 0.808083 0.9020901 1.95764 4.718508 1.77876 1.303238  
1.858323568 1.268425086 1.595936691 0.8527209 2.762983071 2.050246414  
4.296072 3.301242 2.015979218 2.206677 1.583829 1.125745 2.501900047 0.9895031  
0.864487 1.948508 0.360236582 1.485241 1.517932 1.141142 1.964273 1.560043  
1.510698 1.750803 1.908545 1.173837 2.771895 2.054585 2.208748278 1.144384  
1.794957 3.597789 1.710496 1.003409 1.436323 0.7842688 0.770734677 1.263544237  
2.280046173 1.237728 2.127344 1.017003 0.8995294 6.08384 3.049059574 3.03026  
1.905243 2.262323 2.420091 0.738993 1.282454938 1.535347 0.8361921 1.595676  
2.122828 1.487405 4.670367 1.180293 3.336779788 1.073889 5.825203 1.981378374  
1.372343 2.393588 3.174704 3.207045 1.439956 4.856680306 4.065570519 0.447663864  
0.4104976 5.667877 1.199432 1.225262 1.337236 1.094609 1.714677727 2.145642  
0.759289819 1.509347 2.11401 1.576074 2.781698 1.160447 3.432257883 2.019277  
2.095219 2.904204 2.473935 0.6125361 2.547234 2.667419 2.641600952 1.723046  
3.094513552 2.196863 0.4620431 3.116787387 8.993907 1.178913 1.721061  
2.698783426 1.370832 4.318687 5.285 1.895866455 2.196063 1.665481 0.9094584  
1.10349 3.411969 2.054591 1.291168  
AC138696.2 0.4962308 0.347687602 0.6591603 0.750057689 3.126528107  
0.54846392 0.9255342 0.946597829 0.4295154 0.08475476 1.492844059  
0.901475 0.571922 0.6835629 1.976498 2.203526 1.422846 1.279867734 0.3529982  
0.15803 1.045405316 0.4988406 3.091352322 1.030136 2.441948 1.205011089  
0.7871918 1.71062 2.512298 0.6587675 0.8396272 0.421806959 1.118161  
0.641957179 1.149704 0.65880052 1.723525827 0.926874467 0.2933742  
2.286928 1.514225316 1.001321 1.764215527 1.736405 1.658313015 1.599079  
2.279533 20.16987 0.528424061 0.9480864 0.4315346 3.942261 2.034269992  
2.060418 1.680058584 0.3793804 0.2872229 1.739409 0.3311246 4.598289  
1.103459 1.159785 3.175089535 0.9204314 0.6519187 1.246725 0.5762755  
0.7122747 0.2125148 0.3509699 0.1140397 0.798958517 1.787647  
0.6865471 2.234156584 0.5989765 3.368247051 0.6961386 0.7261774  
3.60101 1.257961 0.2254984 1.109059 0.23697586 1.169090764 4.770247  
3.287822 2.204898 1.430738267 1.020444 3.500704 0.6063061 0.45672293  
0.8407349 0.6685353 3.152201289 0.2769351 1.684342933 1.615176779

1.631045 0.54594984 0.9954217 0.7041259 4.872066024 1.178256 0.4032196  
0.370931436 0.5809982 1.935102795 0.897219233 1.416194 2.670547645  
1.898817 6.595007 4.314284 1.799044 0.3546488 1.194093668 2.611574 1.08691  
0.4349635 0.9991471 0.6876315 0.417813 1.408752 0.1081755 1.029864  
1.31302 2.539414 1.911985035 0.213726705 1.452978 2.523953432 1.641308049  
1.295017 0.781191095 1.406987 1.832263 0.485769945 3.870044714 0.443359135  
0.9127892 1.117533 0.5830494 0.8997131 4.09448 2.478769 2.024785  
0.957052775 0.7412379 0.7833349 0.313250615 3.040946 0.6496092  
0.133217609 1.331321 0.55986 1.737302912 0.4691862 1.404163 1.460461271  
0.6906873 1.683835 2.239535 0.427424482 1.110163 2.76946 0.964916788  
0.4178687 0.272292339 3.079982 2.122084 2.527553901 2.650139 1.342613423  
3.767767 0.8542229 3.804751 0.7981915 1.232613 1.805815251 0.5154478  
2.324912 1.183761 0.8746086 1.49062 1.601602 1.186787 1.594596 0.72147289  
1.685711082 1.509018 0.8763934 1.089096 1.109475 0.333135884 1.254504  
0.484497592 1.744571 3.923372 0.711918978 0.240821921 1.459967 1.293766  
0.666056406 3.225151 2.512692 1.883267 0.7010267 0.6658243 0.7933607  
2.160834 0.7597234 0.8672923 0.7717049 1.795901 0.9871298 0.2923609  
0.54671465 0.7471397 0.4490787 0.692674193 3.512369 0.6393356  
0.9596487 0.633959 1.914625 1.448214466 1.599977 1.921076 2.482379 1.362444  
0.8515598 3.205585121 4.418287 6.654305 0.6597464 0.837240478 2.234895537  
0.7400952 0.7992826 1.278041 0.726682387 0.9093353 0.8801628  
2.125035492 0.3264908 1.535033 0.1457866 1.332547 0.5080633 1.490206  
0.652123764 0.6209591 0.511994077 0.9004119 1.212573 1.007257 1.380073  
1.349214 0.8847663 2.332989 1.519697149 0.8089959 2.396031 1.219445073  
0.3980699 0.6702436 1.243869 0.7236011 1.351191 0.3743236 0.8389226  
0.9398245 2.024905716 1.652169 0.730772382 0.8124242 1.298231 0.9659674  
1.336397399 5.137101873 0 1.969299 0.7683078 7.928371 0.6267671  
0.685624594 0.8646303 0 0.5671774 3.261274729 0.7872025 0.6323119  
0.84576508 0.7316526 1.185453365 1.234657 1.010989 1.545285201 1.406314  
0.8057978 7.26258338 1.069068945 0.8196296 1.409091 2.278836 0.189821  
0.5817959 1.121042 1.104223 3.224658 1.028493 1.32447972 1.722579 1.329340347  
1.872939 2.303991219 0.6187647 1.526154 4.383273552 1.339109 0.8338194  
1.673676 3.920848144 0.6653134 0.07461821 1.272992837 0.358974416  
0.8496342 3.725395 0.3169152 4.635362281 1.135018517 1.381104656  
0.943723 0.617979 0.1157614 0.2533824 1.49638 0.7170132 1.659253  
1.642833 0.2478719 1.520962 0.5740705 1.394578643 0.7876692 2.40307  
0.5650232 1.372697 0.1907534 2.39814 0.3616324 0.4717362 1.000681  
3.160568 1.694307553 0.6291113 2.863462 0.8312369 0.6244089 0.672733183  
13.6844 1.528282 1.169708 1.147296 1.557997 1.030646 0.7276298 1.275259089  
0.8473264 0.2962744 0.726598307 2.788085 0.3574278 1.075915 0.606226  
0.6856929 1.574190455 2.587693994 1.376234 0.6667204 1.004226 1.386448001  
2.055654693 2.058500418 2.259154 1.227448 0.2257478 5.563832 0 1.214402  
1.314405 0.731744685 5.213884858 3.057238 0.921841547 0.3853611 1.166891877  
1.04191 2.055516 0.5729296 0.8980533 0.5498631 0.7029404 1.206955

1.116955 1.039255 1.505326644 2.562242 0.5957172 1.545308 1.28528 1.442681431  
0.700199 2.645374 0.850824 2.784137431 0.9536652 1.998256 3.741854 0.8120254  
0.7934711 0.8737419 1.631942 3.366840544 1.297332617 2.379032589  
0.8488971 0.881600325 0.996009095 1.048237 0.209061 0.895954889 1.794757  
1.446539 0.9728273 0.959295813 1.641777 2.98823 0.3707512 1.120691159  
4.667238 1.683909 1.023446 0.2546178 1.063731 2.088782 0.8069224 0.4726334  
3.062792 2.609923 0.5013165 1.13576631 0.2966802 1.325902 0.7140462  
1.048141 0.9048093 1.179156 1.927782 1.874099706 1.361339956 0.315253021  
0.7954198 0.2005497 0.6925911 2.701926 0.535789 1.221132565 0.4054665  
2.177334 0.512791 0.6353478 4.700172 0.372372006 3.444239 3.776822 2.604132  
1.834469 1.09684 1.183535 3.647876 0.922726847 1.165016 0.9626629 0.684893496  
0.9571385 0.4180446 0.5651767 0.9664401 1.666859 1.495168098  
0.674556544 4.259950905 3.173282 0.3390902 0.983474 0.2391701 1.848944  
2.363507 0.72740991 1.033046 4.165494918 0.6768371 3.212361 1.867865  
0.3410374 1.031467 1.642724323 2.127219 0.6983782 1.003882 0.6240308  
7.622366 3.211199 1.359871 2.339201729 1.273752 0.506683686 0.4690282  
3.732222 1.129664112 2.772785 1.989196 0.9589608 0.586099751 0.6962676  
0.9294914 0.6089468 2.235848838 0.8581158 0.6739889 1.034372 1.78799  
2.457669 0.946934 1.765629  
AC093726.2 0.5122046 0.91351205 0.7937753 1.447230236 2.053654692  
0.980701235 2.026452 0.621771181 0.2821265 1.725802 0.933878182 0.6978703  
0.9809056 1.39688 1.112794 2.362638 1.298047 1.541244748 1.414384 0.3633061  
1.177153219 0.7255387 3.625981316 1.649318 1.828548 1.654974394 1.272777  
1.123618 1.425172 1.920152 0.426165 0.785012362 1.932795 1.295124634 1.628359  
1.839111024 2.309473842 1.562627538 1.276653 2.20479 1.556790784 1.381204  
0.555268866 0.806254 1.515492307 1.663057 3.065916 3.467392 0.737575705  
0.4670617 1.417264 5.223581 1.336206799 1.638305 1.572549681 1.370575  
1.084806 3.284768 0.3624977 1.229224 0.7610453 2.419844 2.383488209  
1.571918 0.927792 3.568104 0.4163781 0.6627966 1.20978 0.5475181  
1.161055 1.41038535 1.033307 0.5918814 1.424340146 0.8474021 0.626854422  
3.269391 1.214152 1.6163 1.074176 0.7035616 0.5918927 1.037714613  
3.525429279 1.265383 1.181668 3.072117 0.939778007 0.7149623 0.8875  
0.5376391 1.249990346 0.7075514 1.229554 1.388188257 0.6366652  
2.489305056 1.205597877 0.714233 0.48667988 0.7430012 1.358605 3.054744302  
1.160904 0.5297082 0.700481346 1.431104 2.088184775 1.07343513 0.7530388  
1.35116551 2.026756 2.311979 5.169825 0.7090192 1.141457 0.849699937  
3.037701 1.42787 0.7754852 0.6781643 0.7390957 1.058553 2.820073  
0.3908019 1.074385 1.848118 2.561586 3.689159638 1.123088192 1.11345  
2.652567259 0.66155548 0.9569586 2.244917709 1.114449 0.3401249  
1.143359843 4.582347727 0.527835701 1.083827303 0.6291853 0.9574374  
2.19505 1.714526 2.671225 1.023059 1.414436612 0.9737617 1.543597 2.43480461  
2.130603 0.9245052 1.225052648 1.311714 1.126213 1.6573765 0.8475065  
1.548183 1.334680365 1.406398 0.8295183 0.7968105 1.123012188 1.0452  
2.546761 0.769619092 1.029286 1.699120238 2.981382 0.6666417 0.75228696

1.196758 2.469301387 2.192011 3.406647 1.158694 1.463645 0.9048913 2.449650771  
0.4353056 0.7434637 2.410409 0.9255595 0.4895556 0.5057738  
1.948847 2.194568 1.729728596 0.291383281 1.404195 1.020484 0.5961426  
0.9109458 1.987612648 1.716706 1.891768458 1.241412 0.6247419 0.74819644  
1.080920384 0.7991476 0.8498077 1.121088683 2.261572 0.4584605  
0.2721445 0.7098885 1.220923 1.373856 0.7722881 0.356445 0.5696795  
1.492518 2.328226 1.458888 0.9841884 1.57110009 0.8383773 1.216778  
0.255927302 1.325351 1.243688 1.088775 1.278989 1.135913 2.703573149 1.839149  
0.7530429 2.415624 0 1.118691 1.027725113 1.358451 2.79449 0.9317096  
2.451815789 1.174389879 2.066054 0.5653926 3.111012 1.272853587 1.601838  
2.023467 0.837495578 0.9918541 1.960551 0.3112191 1.083681 1.740114  
0.9482505 2.168503598 0.8922287 0.874386349 1.525277 4.686959 1.389392  
0.615124 2.014156 0.7264466 2.421223 0.457513145 1.620732 1.495137 1.090236976  
0.8062039 1.173996 1.583002 0.7872092 1.885996 0.2458738 0.7439106  
2.469289 3.053082839 0.7325263 0.785465347 2.401378 1.812074 1.136802  
1.365482795 1.472420363 2.603972 1.878699 1.31212 0.1370457 0.7318949  
0.965038614 0.7986529 2.777168 1.024511 1.606622087 0.4955279 0.2855415  
1.349167018 0.504614 0.421775811 0.8515315 2.253083 1.550721894 1.60554  
1.171992 0 1.372513337 1.256202 0.8834882 1.351993 0.8727851 1.464915  
1.334642 2.291311 1.988431 1.873154 1.535262813 0.862075 0.850196667 0.6151183  
0.80550484 1.346315 1.228004 1.826323834 0.8307254 1.070491 1.771177  
1.437433933 0.7647675 0.4901284 0.902176072 1.218257308 0.1395202  
1.381382 0.4460683 1.709322029 1.549928007 1.723634883 0.5423975  
1.913616 0.8364147 0.615805 0.5460527 1.412907 0.953643 0.4222534  
0.936182 0.3650344 1.152181 0.648852189 0.5770767 5.428919 1.079664  
0.9253811 4.322714 0.6444058 0.6680745 1.150905 1.396753 1.942936  
1.593474817 2.685999 1.193623 1.070993 0.6940863 2.844626007 2.33703  
2.593278 1.479017 0.576282 2.232802 1.088 0.5632893 1.626029912 0.3153868  
1.167644 0.437492795 1.068287 1.408655 1.223157 1.216718 1.820351 0.683181435  
1.309245646 1.237021 1.689175 0.7345814 0.487867511 1.912858847 1.352122513  
1.148843 2.395029 0.8896925 2.118605 1.338131 0.5484035 1.193475 2.00268857  
3.466496456 1.327965 1.059642603 2.467957 1.873595662 1.263465 2.089537  
0.6690273 2.838821 1.339363 0.8409995 1.758995 0.9671106 0.6516038  
1.373293412 2.482431 1.788781 0.8535502 0.8442341 2.19983877 0.8585258  
1.480186 1.89027 2.452195487 1.169305 1.418402 1.160642 0.3466954 1.085813  
0.7173948 2.244371 3.695538759 3.621640613 3.397094623 0.5343634  
1.184477073 0.704552032 1.064096 0.6179461 1.392798602 0.9431062  
0.9105666 1.1502 1.918976936 1.123331 0.8832663 0.6331709 1.073514298  
2.667131 2.669001 0.6512411 0.7804778 1.542984 0.7943233 0.4688688  
0.6597029 3.352983 1.019328 1.372037 0.397880628 0.9548819 1.574349  
0.867687 1.244541 0.5348902 1.202555 1.266261 0.615499609 0.603580845  
1.320093007 0.3562296 1.086778 1.157997 3.000182 1.390132 2.263064632  
0.825623 3.257628 0.5389214 0.4590599 1.252817 0.541596397 0.5335714  
3.543998 1.585794 1.686955 0.5178291 2.679995 2.522212 0.515177832 0.855267

0.7587882 1.349613399 0.4301596 1.578903 1.020897 1.867072 0.9123944  
2.196799573 1.356936552 1.470817987 0.305029 2.524282 1.025989 0.5302074  
1.462891 1.552465 0.982140267 1.461502 1.968656081 0.6390827 1.397185  
0.3987437 0.765367 0.7904367 1.019075096 1.702911 1.732975 0.7862057  
0.7059278 1.896492 1.530922 1.218039 1.293895321 1.324715 0.499221481  
0.6601723 0.231899 1.257308208 2.593972 0.5716376 2.449579 2.329120704  
0.6288455 2.331133 1.274954 0.607702147 0.9321936 0.4427085 0.5795102  
0.8925731 1.252486 1.399482 1.836271  
AC103563.7 5.820702 0.486617167 0.06833694 0.262441733 1.176298704 0.284303705  
0.143929 0.271762235 0 0.0395404 0 0.06008038 2.786757 0.177167  
0.7244994 0 0.258143 0.232202875 0 0.03686264 0.243855006 0  
0.686761873 0.1501833 0.0455694 0.971021678 0.2259978 0 0.8879209  
0.5762493 4.308798 0 0.1647324 0.042784355 0.1676151 0.281735996  
0.41811727 0.230619812 0.06843353 0.2409161 0.15357115 0.342572  
0.308645447 9.469556 0.168184374 6.175335 0.4051293 0.07351399 0.462232867  
0.04423081 0.2876038 0.03170986 0.237260569 0.2529582 0.470275813  
0.3539825 0.1674966 1.014352 0.02574644 0.049889 0 1.304936 0.74063281  
0.1717625 0 0.08309016 0.6721204 0.1384565 0.03304798 0.08186849  
0.1596078 0.209663931 0.2668755 0 0.183934378 0.7738306 0  
0.3247676 3.357017 7.727857 0.2347491 0 0.6790954 0.442222734  
0.247914835 0 0.4341109 5.922501 0.233617409 0.6030157 0.3724782  
0.05657166 0.852294672 0.0245141 0.3430789 0 0.9474501 0  
0.342510861 0.2113686 0.036385778 0 0 0 0.4526848 0.1504903  
0.173049603 0.4607875 0.773809785 0.269085326 0.2831541 0.269380131 0  
1.175388 2.175925 0.5035816 0.5625413 0.139269293 0 0.6278049 0  
1.802367 0 0.2506129 0.03129624 9.33636 0.5935089 0.116678 1.269327  
0.111499127 0.07478199 0.1936724 0 0.06961044 1.027073 0 0  
2.118419 0 1.187816521 0.336113529 0.229298993 6.107354 0.06800209  
0.02998147 1.766922 0.3252413 0.2543201 0.027905697 0.1886223  
0.431892 0 2.6955 0.4545906 0.466122281 0.443641 0.4244336 0.11578558  
0.05472203 0.8890372 1.096076583 0.03222244 0 0.8416477 0  
0.1035843 0.1476604 0.192925682 0.6579465 0.4657832 2.193156  
0.1291317 0.368491449 0.03090905 0.96042737 0.8035501 0.1138623 0  
0.4344411 0.06765263 0.036628779 0.03435291 0.08562906 0.2945369  
0.6347113 6.656113 0.02873811 1.22598 0.07084973 0 7.781518544  
0.3519991 0.2230153 0.7621396 0 0.5180565 0.04877168 0.125572946  
0.5765053 0.05546545 0.022141971 0.149799968 0 0 0.155366714  
0.4473196 0.0325622 0 0.027254 0.02588543 0.1345907 0.2075475  
0.3037986 0.3034616 0.08000474 0.08819332 0.8223623 1.43214  
0.159410783 0.348561 0.2095074 0.32315135 0.03486416 4.244575 0.3663018  
0.1267539 0 0.426714591 0.1866082 0.1156431 0.8149573 6.673981  
0.5959137 0 0.4824205 1.119625 0.2154527 0.032549621 0.521319775 0  
0.2868362 0.105219 0.113005699 0.2699643 0.1094986 1.090525536  
0.6854258 0.5172082 0.5101007 2.013024 0.3386077 0.1738054

0.19014592 0.1086354 0.191087329 0 0.08703053 0.7518607 0.04598868  
0.228889 0.07739391 0.3047528 0 0.1509674 0 0.063211588 0.03095174  
0.1563434 0.8341794 0.1054936 0.0787959 0.6112125 0.2739661  
0.03131812 0 0.07707816 0.278938792 0 0.06056601 1.614829 0.13854794  
0.087149009 7.397894 0 0.7168729 0.9733686 0.09746797 0.228473228  
0.4790061 0.4931215 0.3307546 0.202863114 2.478947 0.07374768  
0.591858618 0.4437366 0.783482166 0.02880005 0.3368956 0.160203905  
0.06248417 0.1611114 0 0.86147682 0.2549197 0.1494044 0.171474  
0.132835 0.03015818 0.1961237 0.8898049 1.197372 0.08723999 0.327126606  
0 0.065281413 6.156155 1.386934922 3.175376 0.6051936 0.610422783  
0.03470727 0.5658174 0 0 0.3491851 0.24368 0.25005717 0.27911888  
3.732554 0.3083545 0.04224273 0.45526791 1.003295381 0.730232601  
1.100681 0.04118629 0 0.07092586 0.4266179 0.02573124 0.7353825  
0.6331347 0 0.02729117 0.02975772 0.70482627 0.1696011 0.4416444  
0.04792704 0.3370528 0.266975 0 0.1265335 0.1257587 0.02917781  
0.1134224 0 0 0.2569006 0.4474553 0.9187271 0.510003529  
0.1021463 0.1980515 0.9276906 0.03148499 0.2312698 0.2060675  
0.3637062 0.139986599 0.07906016 0.4146602 0.028248156 0 0.5836242  
0.2702774 0.4399436 0.1332893 0.131143332 0.032627828 0.03379214  
0.08886949 3.811876 0 0.759223234 0.816294465 0.2039917 0.8757992  
0.1404233 1.166175 0.1728016 0.1062284 0.6853477 0.455171729  
1.36452778 0.04600919 0.430064152 1.348361 0.241949687 0 0.9132897  
0.6830674 0.3665955 0.3847891 2.951467 0.6686544 0.1894873  
0.220382 0.507199203 0.2988389 0.1191078 0.09830837 0.1284896 0  
0.1088873 0.04570885 0.7471671 0.029519905 0.1779643 0.2706506  
0.2909461 1.098613 0.03084799 0.5887907 0.7613452 0.16533923  
0.47074296 0.0482558 0.0660056 0.37390048 0.285947896 0.3112016  
0.3413642 0.167194929 0 0.0843562 0.1512835 0.122055705 0.287225  
0.604106 0.0691862 0.043569409 3.745117 0.9905255 0.4177823 0.2771676  
0.7443892 1.282202 0.02895779 0.08268612 0.1465513 0.03290811  
0.2078914 0.105973175 6.699013 0 2.265229 0.1504573 0.2251297  
0.2026715 0 0.257152495 0.22228574 0.036768527 0.13494 0.1871238  
0.8812161 0.1200497 0.04999202 0.284845776 2.232102 0.3385951  
0.2392309 0.4149699 0 0.198539049 0 0.1438359 0.4302766  
1.472027 5.852636 0.1743636 0.4926359 0.043047717 0.06394256 0.4491084  
0.28401906 0.2115147 0.3900584 0.6064417 0.4773924 0 0.036712452  
0.47204846 0.101917075 8.954749 0.4218528 0.1889248 0.1394742  
1.176249 2.20528 0.037706278 0.2224356 0.236989837 0.07894073 0.4860499  
6.404861 0.02651721 0 0 0.9303801 1.230847 0.1080781 1.035119  
1.113508 0.1933047 0.3460455 0.08615536 0.09903999 0.105058542 0  
0.658826 0.292788351 0.4311932 1.314687 0.4970903 0.027343147 0.02706898  
0.03942119 0.07102256 0 0.6774889 0.2358256 0.9935117 0  
0.7512007 0.1577752 0.219657  
AL353804.1 0.5257815 0.687665945 0.8691368 1.205331065 0.448819248

0.271191694 0.5339094 0.684075559 0.2123768 0.1676303 0.562397593  
0.5094176 0.6284237 0.9013128 0.6980664 0.416592 0.2735972  
0.351577365 0.8378032 0.468834 1.033815457 0.9513841 0.291150488  
0.8595413 0.6278676 0.649991871 0.9581103 0.3947197 0.3764312  
1.221495 0.4151593 1.008065633 0.6110804 0.770877309 1.705437 1.275847792  
0.511325401 1.191578306 1.124222 2.261574 0.553400962 1.386308 0.545205186  
0.858577 1.105168984 0.439264 1.502841 0.1558301 0.979810689 1.078212  
0.9144652 1.411546 1.257323194 0.4289632 0.332286531 0.6565552  
0.4615627 0.5375392 0.3547414 1.057514 1.200348 0 1.345666708  
0.5461362 0.2507132 0.7485483 1.05429 0.8804726 1.436085 0.8676971  
1.635243 2.518446568 0.4596354 0.7638027 0.25992796 0.5695538  
0.582908387 0.4474735 0.7181267 0.05935145 0.8086093 0.278748  
1.028215 0.781162109 0.840821578 0.4989517 0.3067332 0.3964461  
0.424462927 0.807305 0.3644099 0.5995843 2.935786638 1.117213 0.4297303  
0.070846693 1.917054 0.832834754 1.306857406 0.5824588 0.154256337  
0.4027034 0.4787197 0 0.3084336 0.2392496 1.421424067 0.5458291  
2.004775485 0.475324412 0.3334507 0.713767753 0.7041622 0.6595171  
0.2882739 0.4892521 0.7365058 0.639629997 0.1076092 1.126044  
0.2765194 0.4610994 1.205469 0.5312326 0.5638875 4.760441 0.3294974  
0.9893056 0.6278151 0.88630681 1.136045106 0.6500122 0.299516602  
0.516444641 0.512264 0.627680983 0.6138478 1.142316 0.280224273 0.352499697  
0.328832884 0.381898671 0.7499187 1.117134 1.04862 0.4555223 0.6128221  
1.463247 0.591526521 0.333191 0.7394391 0.361407399 0.7016876 0.8297762  
0.395222085 0.6582807 0.7612731 0.531775012 0.8699712 0.5951123  
0.408163234 0.546424 0.6475652 0.9227944 0.634028777 0.7684989  
0.6260015 0.511188891 0.103309 1.346367886 0.561075 0.1824833 0.820159016  
0.6879491 0.97366762 0.7451992 0.8749223 0.1026155 1.216903  
0.179257 0.271751432 0.983057 0.4840289 2.809529 2.066179 0.3685236  
0.6091714 0.6706453 0.4880934 1.890706892 0.394821116 0.621787  
0.4727331 0.4038833 0.5028717 0.960874196 0.4135319 1.62370553  
0.6829035 0.235144 1.431520157 1.151068265 0.3609454 0.9995487  
0.90567426 0.4309993 0.6212089 0.7449551 1.530938 1.399191 1.283834  
0.2513974 0.3219861 0.2144193 1.271916 1.074942 0.4532292 0.795079  
1.858496448 1.908713 1.054737 0.984680138 0.4064651 1.118592 2.027429  
0.8508344 0.4275415 0.52763748 1.859131 1.041814 0.545524 0.1443578  
0.842119 0.26417054 0.09296392 0.1618164 0.4567025 1.310934185  
0.442023685 0.810307 0.7600206 0.4832453 2.115954455 1.471507 0.4932294  
0.385270662 0.9686136 0.8433414 0.9010649 0.8785156 0.6100944  
0.1842106 1.974987906 1.18977 0.556949654 0.8904295 1.106889 0.4980452  
1.096692 0.5458318 0.7929301 0.1384275 0.375712266 0.5600189  
0.2369467 0.736954611 1.476213 0.9942195 0.6919194 1.09573 0.08351317  
1.943412 0.9125841 1.692845 0.955717947 0.1633852 0.722670692 2.008543  
0.8344949 1.034863 0.77092252 0.646564485 21.90807 0.04636824 1.025716 0  
0.5509497 0.581162944 0.4809626 14.98244 0.3155003 0.322511869



1.200149 0.6643832 0.776646489 0.5064788 0.586155433 0.3052423 0  
0.339589652 1.258273 1.280675 0 1.922212253 0.2701809 1.29846 1.126786  
1.736378 0.7032005 0.6235951 0.918257 1.041276 0.1849256 0.963085227  
1.013977 0.657301325 0.5893282 0.698234089 1.032589 0.6414247 0.388180164  
0.4782061 0.5622105 0.321829 0.270514867 0.452332 0.4058502 0.397541  
1.183315517 0.5601432 0.4456565 1.007363 0.361892562 1.417812838  
1.09263446 1.92485 0.5238238 0.5723903 1.077465 0.8632112 0.9272376  
0.5332789 0.388496 2.389958 0.5785001 0.41001 1.149264736 0.9886504  
0.2520454 1.473092 1.393201 15.65701 1.293574 0.6705434 0.8996908  
0.7731148 0.8414884 1.218562659 1.86641 0.3267365 0.758789 0.5937369  
1.288970203 0.1623923 1.679266 0.8964732 0.4004389 2.065971 0.3640069  
0.4625762 0.890203032 0.4189663 0.6738765 1.796357234 0.3216704  
1.237128 0.5729161 0.832646 0.9888826 0.667173528 0.31123041 0.9311946  
0.6593288 0.4062652 1.224176054 1.016432365 0.356243809 0.504476  
0.392713 1.823168 0.5980596 1.465173 0.6379986 0.6116862 1.447264432  
0.691669437 0.09752724 1.230689125 16.48209 0.25643448 0.871842 0.338788  
1.353492 0.5550607 2.129754 0.9185875 1.007078 0.5020782 0.2802908  
1.860797348 1.330264 1.136146 0.2778501 0.4993336 1.528593408 0.877086  
0.484453 0 0.312871723 0.4401098 0.4143441 0.9250924 1.40529  
1.013538 0.5760368 0.2521639 0.350475174 0.570199899 1.585486579  
0.4197429 0.713312579 0.416716751 0.4240701 0.6202297 0.886021908  
0.8208723 0.7152508 0.481021 1.034902477 0.3720693 0.6895237  
0.5499613 0.230888884 1.338493 0.3258078 0.6009342 0.5455557  
0.701292 0 1.841484 0.5258177 0.9707808 0.9068337 0.8262645  
0.861100577 0.7334775 0.403447 1.588792 0.5182603 0.08947782 0.9819651  
0.7744791 0.89940653 1.245278933 0.974243676 0.7508468 0.5949789  
0.4358535 0.3817102 0.9007432 1.94077689 0.7618455 2.312691  
0.684593 0.5654737 0.5725876 1.025821772 2.056486 1.372022 0.8315949 0  
0.5423402 1.047212 0.2373312 1.505620148 0.338853 2.094379 0.413905826  
0.7223497 1.188554 1.229604 1.068164 0.7211658 1.245130067 0.70877047  
0.16202781 0.3826953 0.8383271 0.6865205 0.4434723 0.2493335  
0.5228179 0.759309138 0.5500884 0.401884319 0.8366667 1.674232  
0.6003259 1.48955 0.08500262 1.57938696 0.5916475 0.4220551  
0.4963764 1.199941 0.11421 0.5121932 1.986629 0.487003838 1.049692  
1.336176933 0.1987836 0.1995051 1.11714012 2.243491 0.532768 0.3161098  
1.217164139 0.4303428 0.9191867 2.145322 0.457460929 0.3263855  
0.4582302 0.1504272 0.2475435 0.502846 0.5685504 0.7275225  
AC073046.1 0.1216038 0.149104491 0.7956873 1.661906668 0.28834399  
0.731753999 0.6174183 0.999248832 0.4911895 0.4846234 0.528419405  
1.988198 0.9810661 2.301718 0.6054383 0.7411557 0.8587746 0.284597369  
0.8073702 1.671674 0.768545227 0.3259823 1.010068231 1.435752 1.172886  
0.56374295 1.558081 1.369374 0.6094325 0.7062748 0.1309349 0.763759011  
0.6393588 0.367067823 0.8217436 1.663752852 0.591301938 1.165960548  
1.216187 0.5061884 1.204627855 0.6488904 0.294224406 0.1027104

0.494720806 0.4571725 0.6206788 0 0.339918939 0.9757997 1.374746  
0.6218386 1.163185149 0.8060934 0.480324441 0.5423194 0.3284652  
0.2900874 1.293791 0.366876 0.8202377 0.2340561 0.324196413 0.7368171  
0.7869457 1.782177 0.8237784 0.7806105 1.822723 0.7023897 1.304146  
1.313416101 1.226601 0.2453526 0.563593799 1.264585 0.320991065 0.7164872  
0.830449 0.1372693 0.3596477 0.2578776 0.9908657 0.225835969  
0.364625511 0.6294467 0.5320641 0.1528181 0.899897684 1.011374  
0.6672283 1.109385 1.697486889 0.8713193 1.796646 0.286747448 2.533601  
0.481549326 0.545733972 1.29531 1.51626069 0.569177 1.006539 0.08441886  
1.268181 0.6916767 0.901410945 0.930193 1.686067588 0.806182703 0.8097722  
1.320653361 0.9500171 1.016896 0.3333629 0.7715129 0.44613 1.650043536  
0.1244404 0.3255422 0.2842399 0.1904357 0.7863683 1.126259  
0.9205911 0.5566878 0.8659868 0.6792756 1.140876 1.093263238  
0.916558753 1.028616 0.461818761 1.578372111 0.3702421 1.786724249  
0.8045079 1.275435 0.046293461 0.465867731 1.48937407 1.565784551  
0.4107854 0.6667693 1.543354 0.2926503 0.5315054 1.91476 1.026071004  
1.656814 1.669471 1.552330826 1.564918 0.9595617 1.104510609 1.848732  
1.480579 1.0879886 0.8719044 0.229398 0.762468242 1.263781 0.3744255  
0.4268516 3.54378734 0.9733382 0.7239146 0.512324866 0.3584027  
1.245562906 0.4634521 1.213397 0.451638237 1.250152 1.228319152 0.492432  
0.6628832 0.1582209 0.4183683 0.2902124 0.044893735 1.136817  
0.4547855 0.4963702 1.833688 0.1217613 0.8453425 1.163312 0.6078544  
1.567631094 0.101461153 0.862849 1.230015 0.1556849 0.158598 1.46038799  
0.5977657 0.892662658 0.9975368 0.06798073 0.325657297 0.963905176  
0.6029125 0.3236487 1.237754822 0.5980944 0.5986436 1.033769  
1.369548 0.9200611 2.020758 0.9084955 0.372348 0.1239783 1.078628  
1.243074 0.5241189 0.1671705 0.976901979 1.566439 0.3209761 2.079354646  
0.2563857 0.703017 0.5487222 0.3624945 0.7063049 0.392249181  
0.4116864 0.9567246 0.5782787 0 0.973835 0.130924081 0.2687611  
0.3118768 0.2640677 0.638306416 0.511160723 1.843867 0.8437398  
0.5158429 1.338876068 1.938008 0.201309 0.729050638 1.773515 1.072773  
0.5418403 1.124774 0.8300229 0.6923248 1.538134223 0.7545052  
0.585511175 0.5690457 1.17335 0.8639169 0.5072905 0.2104018 1.67581  
0.3201579 0.724129197 0.7401276 0.9590267 0.154949431 0.7966501  
0.3832419 0.6667855 1.034378 0.2414387 3.745636 1.199229 0.3838477  
0.578915352 0.2834105 1.633421065 0.3981771 1.892921 0.2761676  
1.570742869 0.427253601 0.4000219 0.911552 1.23008 0 0.7565847  
0.784073254 0.5870895 6.64829 1.621546 1.118868099 0.6751775 0.7682995  
0.449060983 0.3765197 2.428912888 0.2117912 1.238739 1.27629111  
0.6126653 1.349342 0 0.778003087 0.23433 0.4394788 1.34506 0.651232  
0.8131883 1.001572 0.6313892 0.5268123 0.2138498 1.425563692  
0.1876118 0.800115783 0.09735788 0.722450845 0.8845163 0.3926912  
0.299263682 0.5955411 0.4767737 0.5316663 0.990616195 1.711903  
0.6399946 0.498030531 0.47893937 0.4048471 0.6871489 0.6730675

0.418496271 0.751471099 0.526472373 0.539616 0.2019184 0.2647672  
0.9852027 0.1901383 1.482251 0.6166892 0.4492608 0.7795255  
1.137272 0.9118072 1.196119375 0.4850302 0.458021 1.204197 1.652423  
6.871525 3.615098 1.11144 0.8862766 1.501984 0.7414139 1.541266953  
1.318983 1.259472 0.9871553 0.9612448 0.48083173 0.1877921 0.9224121  
1.738965 0.8489646 0.9313481 0.6735062 1.575065 0.857866597 1.001294  
0.6098695 1.627238645 0.8502469 1.430628 0.9937892 0.8473347  
0.5554405 0.964407888 0.199950021 1.325345 2.61413 0.9135179 0.962641826  
2.30185009 0.470815993 0.6250514 1.444982 0.9465973 0.04610682  
0.4235854 0.867986 0.3094701 0.92979524 1.163423463 0.3947352  
1.054208538 9.144422 0.741358657 2.337207 0.05596827 0.9827946 1.15538  
0.812223 0.8900049 1.035196 0.1161217 0.5942404 0.812919275 0.5860307  
0.3892892 0.6426174 1.102375 1.414144876 1.121037 0.3361358 2.003222  
0.108542421 0.5453009 0.5160096 0.5348932 0.1857248 1.701385  
1.110225 0 0.658601264 0.90665439 1.242030057 0.4044958 1.237322973  
1.007599733 0.762843 0.05977 0.887990846 0.7440186 0.654806 0.2225031  
0.698116906 0.1173449 0.2278206 1.399158 0.747606367 0.4269924  
0.5023567 1.353278 0.6308862 1.115099 0.7543294 0.6743452 0.3715929  
0.3143338 1.008338 1.178451 1.298850704 0.2374963 0.2332751 0.4082879  
0.2766099 1.241677 0.8516659 0.2066805 0.59883563 1.284371889  
0.721040243 0.7442459 0.8600496 0.6840346 0.2207068 1.807532  
2.194460206 1.622906 0.3227747 0.9089549 0.5086041 0.4673973  
0.63876121 0.8174861 0.5288736 1.054729 1.090898 0.2743859 1.674039  
0.3842331 1.371787246 0.5485943 1.651337 0.652697648 0.9793555  
0.4780715 0.7109633 0.6501241 0.5162632 1.754855189 1.687472379  
0.374741243 0.1327658 1.260285 1.356245 1.333373 0.9130506 0.5334635  
1.386430855 0.4543771 0.17427868 0.387012 0.8439404 0.3204106  
0.6500115 0.03276597 1.513318831 0.380104 1.109247 1.148029 1.030806  
0.2201227 1.006919 1.237039 0.915161378 0.7283249 1.641741755 0.344813  
0.1153549 1.363642976 1.921775 0.2843531 0.4874034 1.67564416  
0.6303602 1.062957 1.305722 0.52901251 1.585229 0.2890375 0.03479111  
1.513098 1.986779 1.663031 1.245145  
AC024075.2 6.342717 4.724172837 2.461522 4.556294939 7.374793944 2.841570178  
8.734035 4.199999547 0.9103511 4.131636 1.969465399 2.242103 2.991967  
5.611228 3.056374 6.210764 4.930428 4.693331073 4.296656 2.691499 2.645298235  
3.344472 8.535522274 4.932048 3.726482 4.461210898 3.896084 1.502048 3.918667  
4.575203 4.356495 2.352105947 6.842489 3.776409139 5.341333 4.986847113  
5.061994184 4.39672835 2.742591 6.957943 2.810696102 4.517434 1.157379682  
8.756533 3.623922264 5.756297 6.770582 4.699605 1.739978819 1.377911 4.423826  
8.32469 5.594817911 2.840207 2.988576717 5.255307 4.554862 6.583304 1.537305  
6.540505 2.088182 6.765063 7.296069989 3.776268 2.74153 4.421998 1.404618  
3.828054 4.139591 1.872971 3.211227 6.871795832 2.230032 5.287822 4.128429797  
2.14842 0.688398353 5.922896 3.557969 6.033138 2.837628 2.355563 5.960531  
1.734015483 5.98550228 3.263679 2.432396 11.55162 3.877174432 3.120634

2.835845 2.175417 4.563508542 2.537651 3.542375 4.685404915 3.563682 9.243589397  
3.234390752 2.098878 3.435973518 1.000091 2.025378 2.212771331 4.900155  
0.8301999 2.484900663 3.676657 5.231402425 2.600204164 1.551848 4.51284871  
2.563231 5.362351 8.226119 2.301444 3.253668 4.03732824 7.54499 7.091287  
4.863484 2.510959 1.618308 2.493992 3.310815 4.290741 2.457921 5.87822 5.821614  
7.109829281 5.160854242 3.383329 9.950031 3.038238163 4.273996 5.277614077  
2.894378 2.677411 0.919269329 7.832460524 2.030407255 2.699995085 4.157122  
1.610906 3.629 3.688229 6.051151 4.633406 3.694691518 2.27495 4.474093  
3.461919053 3.928525 3.499459 2.33949294 5.269118 3.231405 2.868097107  
3.693607 4.555255 3.133876841 4.6322 6.372968 2.985498 4.810000468 3.540665  
4.803674 2.065994368 1.091267 4.465803868 7.8532 2.165053 2.355693534  
2.166529 8.74020374 5.035894 8.507558 2.40876 1.842804 0.8342447 5.515254749  
2.162671 1.806174 7.9331 3.736862 9.04282 1.921103 4.645744 6.196153 3.407820622  
6.380067403 9.404644 2.195229 3.627364 2.169552 4.177617464 6.631425 5.26482267  
5.568395 6.983601 2.205869435 4.192721088 3.04526 2.044345 3.327568971  
7.033599 2.229572 2.588808 3.847199 5.317215 3.439463 3.550349 1.215882 1.345834  
3.465949 8.485659 1.697249 2.744183 4.572935863 3.760933 2.668482 1.205949062  
3.609068 6.968889 5.124523 3.784202 3.309995 4.661897941 6.225139 4.081072  
4.982983 0.9429154 2.981254 2.414940448 2.945972 5.582024 3.06632 4.38348156  
1.725557837 3.217272 1.842996 2.458396 4.314981583 3.767038 5.48099 3.710420649  
4.695661 4.325059 1.931203 5.831146 2.999747 2.241948 4.837580697 2.890748  
1.178177272 4.397949 7.484152 3.33954 1.469983 5.162201 1.565497 4.054681  
1.629659394 5.143962 5.477362 2.133315995 2.983092 1.226088 5.425724 2.711293  
4.730429 3.40017 2.273406 5.874199 5.072074518 1.513254 4.123589388 3.42627  
4.972499 5.496166 3.225871989 6.094455006 10.73243 3.60602 5.036458 1.895194  
3.247256 2.150099044 3.117005 10.24139 2.01785 4.492942843 3.51569 1.280346  
3.466275204 0.9858187 3.125731216 2.691603 3.717059 3.223219912 7.988981  
2.465963 15.55000032 5.046720639 2.605788 2.870187 4.006415 4.051963 4.139717  
4.370199 4.361624 5.788498 2.406355 3.066703971 0.9189541 2.340868272  
8.184209 3.881864188 3.910967 3.003613 5.239400058 2.826958 2.318103 2.857571  
2.898898286 1.296808 2.033384 2.63722888 2.825979176 2.872683 3.856991  
2.570268 4.296713239 3.590392837 5.687188324 3.393206 3.261126 3.119507  
0.9973599 2.25281 3.306596 4.220113 1.027286 4.352988 3.011107 2.896984  
3.448418383 3.8801 6.449268 3.740424 2.067211 8.259247 2.145346 2.853747  
3.377002 2.471259 1.729903 4.162362483 3.174741 3.051205 3.910794 1.926964  
5.21961939 4.375441 7.185302 4.666164 2.850578 6.411317 2.641386 2.258221  
2.078273558 1.616305 2.386206 2.447521487 3.067209 2.867915 4.097176 1.499034  
4.178281 2.493842259 2.212888828 2.072539 5.666833 4.381271 2.32385681  
4.499564829 6.076978322 2.361022 3.169964 5.103668 4.895211 6.196338 2.079808  
4.13197 6.363700418 5.217338162 4.688127 4.186775252 10.35544 2.512465997  
2.353914 4.608548 3.40201 4.571582 4.41197 5.777051 3.66588 4.227444 1.73068  
4.114752528 5.39184 1.945455 1.712065 3.94721 7.893962145 2.332095 3.307732  
4.90227 4.531074988 2.90679 2.732434 4.405999 3.024175 3.783936 2.006205  
4.709628 7.3103399 11.947995971 6.65523816 1.713547 3.834142546 1.623865682

2.45255 3.291611 5.886782492 4.136804 2.819547 3.446305 3.115831638 1.698434  
2.940557 1.964503 4.100197853 3.91446 6.184819 1.6172 2.672593 3.435521  
3.128956 2.894285 1.234285 11.61581 2.605661 3.170732 1.834086533 4.204036  
1.312469 5.815816 2.367991 1.935993 2.903209 2.818179 0.634204741 0.968649292  
2.529514905 3.076183 4.6605 1.677641 7.830372 4.883063 3.604952449 4.591544  
5.884511 1.638042 1.250423 3.021582 1.054999845 3.325341 8.308306 2.028714  
5.732211 5.396708 5.32817 8.966929 2.360815118 2.106111 3.876662 2.903241677  
1.708328 2.579006 3.858894 4.346298 2.565544 4.658169577 4.646563455 5.390880479  
2.015373 3.781711 3.328125 1.475491 4.860338 3.022598 4.221413703 3.945955  
5.152638516 0.5251461 3.877455 5.599029 2.813848 1.778438 4.089648756  
3.924903 2.948655 2.069259 2.676738 4.510947 4.328294 4.735084 3.103347648  
4.917305 1.593815824 0.699926 1.710353 3.448939437 8.064801 4.10314 4.694112  
3.29190704 3.346741 5.526352 3.122919 3.933475571 2.268457 1.466772 1.685704  
1.710741 4.96522 4.392898 1.79092  
AL662844.4 0.6851463 2.417825465 0.7366327 2.055423681 1.220432702  
2.11172137 0.9757298 1.991103646 1.67624 0.6260145 0.424522989  
0.8955532 1.308242 1.653135 0.8652776 1.980985 1.229824 1.419118867  
0.5880318 0.4718626 1.425789507 0.6103554 2.660415796 3.354136  
0.8826463 1.291166024 2.336206 0.2867509 0.9212351 2.594652 0.8216878  
0.734694186 0.6242765 1.895205204 2.602912 3.20519143 2.388959837  
2.539357346 1.757739 2.863585 1.339846058 3.383252 0.872187418 0.9739031  
1.467340516 4.907328 2.021471 0.4333647 1.567443922 0.7747717 2.063572  
2.446107 1.112259936 1.448582 1.280526682 4.188357 1.201797 4.356568 0.7328572  
1.033536 0.3728353 4.535146 2.726539813 1.229512 0.2447439 1.084593  
0.7697887 1.991529 1.675433 0.2275182 2.168522 1.848066639 0.8259459  
0.2764755 1.342457393 1.495233 0.158798962 1.318273 1.270892 0.6413638  
0.9983456 0.5138471 2.140521 1.030346766 5.236191933 0.2522888  
0.7506641 1.12352 1.236645866 1.592967 0.4729325 1.929476 2.171204161  
2.200689 1.854349 0.467231194 2.422678 1.786721071 0.536503799 2.285552  
0.337062055 0.2702032 0.7261763 0.440834214 1.960586 0.8364463  
0.5464965 2.424163 3.51171252 0.649610029 1.229373 2.722277012 2.275335  
2.369802 2.070656 1.901325 0.7691306 1.485604554 2.599304 1.866722 0.7909742  
2.04648 0.6974995 1.336661 1.750031 0.6120035 0.3617738 2.859352  
3.563181 2.77938487 2.414121452 0.907922 1.356531589 1.2310599 1.709532  
1.688038898 0.9559847 0.2065696 0.279913948 2.66482744 0.553046779  
1.693783852 0.7777615 0.8361047 3.974141 1.423654 2.428575 1.554289  
2.23255407 0.8789526 1.494027 1.189682716 3.488623 1.076178 0.418710736  
1.848119 1.12729 0.767062466 2.387138 2.923854 0.623684131 1.812677 1.359851  
1.691313 1.466566995 3.751007 1.958529 0.731118995 1.617106 1.148239589  
1.120907 0.5002376 1.204050353 2.384331 3.235266265 2.326169 3.380063  
0.4729065 0.7839883 0.307655 0.863706102 0.636461 0.4567084 3.609011  
2.206793 0.577272 0.1742514 2.531166 1.742234 2.318653201 0.299771588  
2.509802 1.990793 1.212346 2.753391 3.045215696 1.125392 2.157306051 3.044368  
1.064983 0.760785017 1.898601104 0.7775404 0.3049786 1.707473618

0.4178021 1.7934 1.462047 1.992212 0.5972986 2.011865 0.963812 0.7248846  
0.1405568 1.846085 3.015416 1.628869 1.292214 2.405698574 3.453963 1.120363  
0.591903278 1.203784 0.6801281 3.105348 2.519178 6.478817 2.479545565  
1.678369 0.8326672 3.301512 0.1529372 0.6858537 1.403351143 1.13016  
2.374352 1.389326 2.741141453 0.22829324 3.294012 1.004877 0.8152063  
2.0746381 1.078281 1.904207 1.408179204 4.431814 3.310278 0.9450704  
0.9373752 1.214764 1.397823 2.498026944 1.305207 0.764382982 1.098505  
4.089699 2.619756 1.460084 1.426403 1.35133 1.136572 1.293634612 3.146618  
3.294754 1.187099367 1.261583 1.180582 2.577861 1.364592 1.393505 1.397119  
1.331575 2.621607 2.111822677 1.752591 1.477298809 1.395304 1.611764 1.138535  
1.265946412 0.9687727 0.2748565 1.061078 1.605866 1.459093 0.9412058  
0.592613506 1.817384 2.630097 0.740923 1.887777807 1.365977 0.3912681  
0.607608941 1.72472 1.241983088 0.2473882 3.308106 1.672939722 3.073041  
2.116588 3.58705669 2.283372094 0.4615591 1.253165 2.350922 1.223068  
1.183523 2.63712 1.26205 0.8945944 0.9036625 1.726386263 1.108615  
0.66521254 0.1672374 0.589838303 1.519386 1.403062 1.44451669 0.6956374  
0.5479736 0.336085 0.716479945 0.6730789 0.7035882 0.652809575  
2.830096279 0.6119781 1.175635 1.803622 1.201321219 1.962086273 4.348127539  
1.501627 0.8324332 0.04548062 0.5096932 1.835558 0.4853939 1.290745  
0.634215 1.012799 0.671105 0.8771084 2.182489369 1.209279 1.041397 2.139153  
1.901771 2.697971 1.850112 0.9341692 0.8737307 2.953538 0.9360743  
3.491707463 1.326461 1.350004 1.718304 1.034115 2.543935315 1.393552 2.968818  
5.712299 0.3977227 2.364968 1.081721 1.584553 0.754487324 0.3062676  
1.536493 0.908738598 1.102692 2.5979 1.853412 0.8944812 1.342493 1.665455624  
0.599004609 1.070013 2.267675 0.7711515 0.630308322 3.243981976 2.264495527  
0.8818554 2.524682 1.348123 1.717065 3.041442 0.8230269 0.6257633  
2.644903797 1.908549457 1.518854 2.354139045 1.710838 0.621456041 0.9950304  
1.622843 2.521052 3.316595 1.342996 0.7417214 1.701161 1.117027 0.2078642  
1.531110859 2.657581 0.4881547 0.5408923 0.3390472 2.064786056  
1.217757 0.2848509 2.143284 1.113726319 1.523691 0.4001373 0.9882393  
0.7273894 1.33529 1.903284 1.659004 2.743011608 2.809008029 3.242932602  
0.80044 0.699027895 0.583961423 1.87946 0.2792636 2.032241207 0.6134614  
0.8193272 0.7898937 2.747873325 2.623101 0.2426314 0.5069023  
0.601742968 0.9388417 1.541764 1.407329 0.7669336 1.225902 0.9415828  
1.048623 0.1578359 3.46802 0.3990717 1.855786 0.773452322 0.4242798  
0.3125541 0.7462261 2.090656 0.4218405 0.9948106 0.8283971  
1.628523734 1.080389705 1.523445228 0.7500152 1.678279 2.923911 4.205717  
1.465094 1.61748124 1.172453 2.167104 0.9871859 1.038406 0.5834231  
1.103507738 1.169352 2.701206 1.249056 1.873899 0.7648994 5.619037 5.521537  
1.848867588 1.755469 2.307101 0.663736932 1.353754 1.182545 2.766717 2.099502  
0.7312818 2.380617504 3.359145409 0.875452587 0.5473432 1.731893  
1.150077 1.724271 1.551891 0.948129 1.117742705 1.292525 0.646636542 0.4254677  
2.305854 0.3375715 1.384538 0.1440871 0.903556261 3.301199 1.237761  
1.177155 1.214957 0.5928887 1.001159 2.103078 2.031542172 1.890531 0.946674452

0.4422549 0.523121 1.257504302 4.106626 1.699806 0.6949106 2.579004119  
1.390552 3.22023 4.138928 0.78755386 0.5809156 1.436531 0.3298903  
0.2866076 1.305191 1.434987 0.3514667  
AL157392.3 0.3468186 0.934119834 0.5113037 1.221461112 0.665286189  
0.948022418 0.6274795 0.920611946 0.391541 0.5357825 0.433755252  
0.7034924 0.8095443 1.690899 0.744047 1.536367 0.8451456 0.628304522  
0.7742335 0.8947534 0.722430303 1.274112 1.545571836 2.143852 1.268513  
0.835522151 1.068486 0.3494893 0.5032329 1.227831 0.7919675 0.739078472  
1.255189 0.749879727 1.066489 1.548162952 1.136908884 1.177803248 1.08352  
1.484221 0.969893568 1.817328 0.323263748 0.4180067 0.865997688 1.602982  
0.9755983 0.7362725 0.600013033 0.7205094 1.328404 1.232051 1.110086647  
0.788359 0.555272459 1.452 0.5456961 1.22109 0.4838686 0.5628507  
0.5929247 1.05662 1.026951625 0.8171289 0.4280416 1.510165 0.6636526  
0.7170043 1.713355 0.7331284 0.8071045 2.670128154 0.6092564  
0.3255038 0.739580104 1.047294 0.189010269 1.545023 0.8228562 0.4800237  
0.6915024 0.5237171 1.476498 0.750114441 1.112953816 0.3832461  
0.3299211 0.6464187 0.913298066 0.9526621 0.4743332 0.3457854  
1.207185475 0.9813528 0.8865807 0.799436406 1.022488 1.14288953  
0.587201279 0.4296148 0.319401972 0.4526707 0.608408 0.389553473  
1.609697 0.5208781 0.531418087 1.423616 2.088199695 0.961744706 0.3419766  
1.375756884 0.7795746 1.378829 1.092843 0.4957043 1.04981 1.351078929  
0.8449016 1.114577 0.4961324 0.5620477 0.6193911 1.373932 0.9145207  
0.7120837 1.067298 1.523448 1.358528 1.507557252 1.329792489 0.4925337  
1.304174816 1.24466573 0.6887366 1.978023321 0.8803365 0.3952154  
0.440596663 1.377190796 0.408984253 0.920538893 0.9752156 0.9835432  
1.645339 0.8806021 1.75326 1.12694 1.054652017 1.148294 1.50025 0.967157494  
1.050329 1.097311 0.457686675 1.8287 0.949234 0.588915032 0.7979159  
0.3404497 0.63614536 2.017954 1.099157 0.5001242 1.527212144 0.871652  
1.184191 0.376974111 0.6087126 1.261048967 0.7652229 0.4146189  
0.66539196 0.5035011 1.744225307 0.9793561 2.867714 0.4230486  
0.7468176 0.3178594 0.460723094 0.5646606 0.3405216 2.607197  
1.416946 0.5135854 0.2353383 1.628615 2.454343 1.513999321 0.241413392  
1.209701 0.7182521 1.002785 0.331622 1.455082056 0.6709254 1.873179697  
0.9490031 1.066904 0.546575243 2.133525599 0.4726102 0.5333883  
0.686497405 0.6696174 0.2954297 1.033163 1.544632 1.084288 1.009994  
0.8480635 0.5026365 0.6018988 1.293831 1.875697 0.3682107 0.6790044  
1.377740628 1.421205 0.6526336 0.304611021 0.3625297 0.7556035  
1.220489 0.5177535 0.5618839 0.998248825 1.215922 0.5876228 0.9109744  
0.07623109 0.4929713 0.287392356 0.2687114 0.4512383 0.4678357  
1.200438531 0.454554091 1.475489 0.893097 0.7345684 1.232772139 1.025854  
0.9547509 0.688225839 0.9489602 1.420412 0.4447719 0.8615623  
0.5166735 0.687333 1.608648307 1.065627 0.419351135 0.5131927 2.432918  
1.125376 0.5107189 0.9439363 0.5456318 0.5796659 0.629144973  
1.805506 1.326979 0.256959955 1.095009 0.3845526 0.9487117 1.236177

0.5326918 1.026258 0.7124871 2.424436 1.319268099 0.3905255 0.917533921  
0.6252267 1.434415 1.050924 1.212121582 0.884384938 5.829369 1.166292  
1.520423 0.2035754 0.7675465 0.596291613 0.8399234 8.301563 0.6060186  
0.600563329 0.5968014 0.4844432 0.532995288 0.4001793 0.757537355  
0.2528129 1.823032 1.166807088 0.9791998 1.257656 0.91251433 1.228761182  
0.5200113 0.4990753 1.353701 1.489522 0.99853 1.103451 0.9725679  
0.7931473 0.5216766 0.862974693 0.2863257 0.521132908 0.4843595  
0.646531163 1.641155 0.5096492 0.724645235 0.330227 0.5343962 0.4421214  
0.461132798 0.3942957 0.4809327 0.383950326 1.317168651 0.286065  
0.3525942 1.07325 1.001344377 1.532711058 1.293161758 0.6127918  
0.6066138 0.5663443 0.4415321 0.603212 0.7049095 0.4013211  
0.7568095 1.660614 0.5820367 0.6355173 0.854441184 0.7710421  
0.5343925 1.617206 0.5927368 10.40185 1.276316 0.7709314 0.6482848  
1.295256 0.76511 1.583316678 2.059089 0.5070252 1.151995 0.6382911  
0.947618088 0.3460272 2.115415 1.305269 0.2967859 1.526007 0.5827341  
0.5899689 1.037084429 0.4851836 0.7279949 0.385266062 0.4687243  
1.429381 1.676482 0.6396416 1.290187 0.565557741 0.592050201 1.134776  
1.863899 0.9001757 0.347042256 1.170016358 0.719955035 0.4396584  
0.5953497 1.06307 0.8011795 1.465986 0.6477399 0.4664569 1.883828072  
1.176140677 0.4838408 1.361856565 9.222699 0.693113464 1.415326 1.072078  
0.9903115 1.710844 1.202115 0.7672941 1.563288 0.3139729 0.7153976  
1.141232468 1.818683 0.8174966 0.5318761 0.8150212 1.042285864  
0.8666669 0.3042975 1.829528 0.646960186 0.6247084 0.6386919  
0.4042382 0.5657756 1.604749 0.5129838 0.4317198 1.014262994  
1.189565791 1.936048754 0.4345582 0.687274567 0.359038448 1.157673  
1.081694 1.151646475 1.112369 0.5425337 0.5454595 1.059445829 0.5471324  
0.4270847 0.5889887 0.238717507 0.3861207 0.7274374 0.5080887  
0.4642128 0.6858444 1.258494 0.5655468 0.4229984 1.482881 0.7987665  
1.203341 0.539006633 0.4280992 0.43731 0.9567479 0.6648048 0.4550978  
0.6370962 0.3882822 0.244671241 0.54721638 0.591368973 0.5147544  
0.8585126 0.5459844 0.7461623 1.58822 1.570264093 1.106626 1.760969  
0.3558757 0.6443689 0.4165732 0.358944335 0.7751822 1.547559  
1.117609 1.05883 0.6566333 1.819941 1.807356 0.975138096 0.510445 1.193294  
0.656760165 0.6514445 0.992447 1.462518 1.455478 0.5564456 1.756261063  
1.805354334 0.474344311 0.1627357 1.304788 0.6606654 0.6146319  
1.023296 0.4248115 1.046295202 0.6115484 0.290410767 0.3790342  
0.7588333 0.5480371 1.135748 0.2677492 1.424744997 0.5938027  
0.6547616 1.501628 0.9080778 0.3428201 1.248452 1.181595 0.913638647  
1.139742 0.827063288 0.3011032 0.07901458 0.953890626 2.86019 0.4464976  
0.5710703 1.25488988 0.4840055 1.740688 1.943577 0.651607663 0.6830684  
0.4955336 0.240817 0.3341725 1.07147 1.264146 0.6955737  
AC005332.5 0.4566257 0.878816963 1.021156 3.677030983 2.56568166 1.421081936  
1.383507 1.401140501 0.2918402 1.230075 0.788281964 1.774557 1.145075  
1.449103 2.768414 3.387231 1.720854 1.866792251 1.43334 1.159657 1.400335301



1.981371 4.356957938 2.840007 2.094593 2.018618875 0.9331395 1.571436  
3.234019 4.189617 0.6534775 1.100553733 2.989416 3.252705987 1.892414  
2.184439603 2.405853002 2.977588462 1.54885 3.133834 1.562079699 2.247914  
0.683270675 0.956878 0.875936198 1.687721 3.814622 4.5097 0.791694202  
1.198194 1.940227 3.868302 4.195015545 1.529662 1.609569837 2.551975 1.516374  
3.185128 0.8774498 3.260971 1.169626 2.024778 3.873998966 1.448426 1.777727  
2.693792 1.212264 1.180874 1.738529 0.8513425 0.7345655 2.67088765 1.87152  
0.650745 1.510884729 1.374976 0.759815779 3.575887 1.29184 1.536562 0.4820726  
0.9744663 2.153312 0.624744036 5.216744515 4.383113 1.112763 1.884943  
1.143230497 1.325695 1.397116 1.240833 2.668809369 1.632344 1.368187 1.063114854  
1.603186 4.377521063 1.209194834 1.21906 1.042908202 1.542085 3.100213  
1.793630688 2.99512 1.052057 0.94512923 1.757504 2.35167128 1.421303991  
1.149204 3.525112335 2.154596 6.20502 2.880694 1.261501 1.43426 1.444191166  
2.333428 2.063625 1.879647 1.042766 1.228366 1.143666 2.964572 0.5997708  
2.667303 2.788605 3.179739 3.273793755 2.744649429 1.393427 5.013097532  
0.985439497 1.441304 1.775495977 1.525096 1.032773 1.161821987 5.422419332  
0.433794898 1.585822013 1.008815 1.824321 3.311621 2.545576 4.541116 2.806567  
1.380224945 1.384564 2.607046 1.77084906 1.661235 1.884718 1.129646354  
3.509787 2.014242 1.166943659 2.046664 0.9813369 0.735187451 2.838308  
3.500962 0.8775038 2.015510898 2.021566 2.812944 0.932862096 0.8560387  
3.004607412 1.427466 1.940895 3.162128191 1.820481 2.955713132 2.677093  
3.378006 1.850056 2.04463 1.22967 2.061336458 0.9666295 1.282046 2.676786  
1.830336 0.52088 1.25565 1.79016 2.526033 2.041253882 0.557016165 2.563308  
1.175797 1.620603 1.093079 1.964750586 2.633884 2.321947084 1.825474 3.606086  
0.986795191 2.500262786 2.288202 0.9559852 2.382734602 2.530147 0.5463307  
1.369696 2.110107 2.08558 1.558373 2.316315 0.5663501 1.427564 2.719605  
4.886136 1.299278 1.048865 1.688343793 1.852938 1.812488 0.600074924 2.022963  
0.8661375 1.998819 1.846081 2.245972 3.01417561 3.457062 0.8791838  
3.096006 0.09521808 1.006771 1.54332445 1.663272 2.330353 1.048961 2.656644139  
0.892895924 2.551695 1.178074 0.9378534 1.711681691 2.022088 2.32039  
2.489256992 1.910031 2.016465 1.040096 2.478256 0.9882887 2.490851 2.891191303  
1.810033 1.093739156 1.209427 3.673325 2.603438 0.6671133 3.690302 0.7529612  
2.503319 0.872529349 3.027656 3.116023 1.822851167 2.077241 0.9381368  
2.199539 1.489732 2.416859 0.4120297 1.409083 2.813386 2.896789667 0.8419415  
1.26751419 1.96832 3.191441 1.936202 2.336673071 2.170440482 0.6844981  
4.411798 1.979565 1.445995 0.9993644 1.940627376 1.10594 2.901514 1.398917  
1.427051147 1.28905 1.4049 1.595931537 0.9425612 1.256537223 1.273457  
2.190327 2.533916171 2.560846 1.759855 3.21457987 1.988997708 1.770969  
1.065354 3.038833 1.772137 2.118858 2.130876 2.029848 3.847284 1.539953 2.655340415  
1.244 0.844290365 0.7843806 1.860394443 1.482009 1.822987 2.656443892  
1.425473 0.7045823 2.941563 2.096564401 0.7119887 0.4015469 0.890445812  
1.365896559 0.3059667 1.273801 0.7198254 4.807224073 2.216196552  
3.73862758 1.106114 1.518818 0.3114766 0.8553115 1.531882 0.7555107  
2.069911 1.566626 2.455563 0.6772999 1.581044 1.345543185 2.06502 2.054358

2.324417 1.078002 4.665961 1.119876 1.153637 1.065983 2.238658 2.834688 2.003123756  
2.898167 1.167371 2.215736 1.351115 2.543749287 1.856636 7.483493 2.474926  
1.188579 1.680291 1.164476 0.6610809 1.467939917 0.8705001 0.9372888  
1.06144899 2.576388 1.398869 2.577779 0.9007068 1.807705 0.838876185  
2.041464127 1.783583 2.772436 0.8820732 1.663375509 2.220821099 2.072838419  
1.604337 1.730809 2.233321 3.195278 2.725621 1.689478 1.468872 2.936759117  
4.417074364 1.656465 2.239855873 4.414604 1.310863058 1.535685 1.707902  
1.551949 3.16691 1.785866 0.839251 1.383889 1.86283 1.163198 1.438759589  
2.590534 0.6175607 1.133979 2.028554 3.033172715 1.050478 2.220832 1.615971  
3.064587107 1.700302 1.156271 2.059388 0.9335472 1.833058 0.9142609  
2.386789 3.958831732 4.871704021 2.715663526 1.032463 1.274269241 1.036992397  
1.585056 0.4005792 2.537348615 1.671896 1.223674 1.390746 2.495827194 2.00795  
1.120778 0.5320381 1.500093946 2.001673 1.874424 1.095246 2.43589 1.655136  
1.147353 2.080069 1.262069 4.360613 1.391839 1.662257 1.098917926 1.054684  
1.879421 1.566124 1.794678 1.027921 1.492751 2.274241 0.912341323 0.993429744  
2.107757492 1.025889 1.684251 0.8213944 3.021303 2.276035 3.07231723  
1.414967 3.110068 0.7191448 0.4765922 2.738162 0.637593456 3.32755  
4.267246 1.716331 4.918014 1.073179 3.646696 5.713824 1.406896974 1.558959  
1.773904 0.912106183 0.9529205 1.448635 2.115166 3.119526 1.336433 2.271366496  
1.773763079 2.458083329 0.1577656 2.42841 1.240558 1.018921 1.829615  
1.785104 1.627725585 1.736435 1.822438852 0.4414908 1.769743 0.3655142  
1.357894 1.653992 1.473346532 2.352337 0.828833 0.6611138 1.939122 0.9039921  
2.381783 2.902987 2.439314972 3.54265 1.257744732 1.043474 0.3043091  
2.000788197 3.562486 0.6825514 2.588941 1.567447173 1.01714 2.549189  
1.923971 1.999028992 1.006449 1.181514 1.299801 1.061314 2.480661 3.717056  
1.214077  
AL049869.3 0.396629 0.382113659 0.1170791 0.786854874 0.241836895 0.438377972  
0.246588 0.465599814 0.1716522 0.06774305 0.227277163 0.9264006  
0.2285638 1.396254 0.4795766 0.6216145 0.4738569 0.08524806  
0.3385746 0.2526214 0.328261552 0.6550317 0.294150695 0.8748312  
0.9759039 0.262675927 0.7017879 0.1823027 0.2738233 0.1645443  
0.5490817 0.561905328 0.2587105 0.219902382 0.7179211 0.702090877  
0.137758516 0.469195593 0.6155338 0.6486106 0.552525881 1.253865  
0.029377245 0.478579 0.432215758 1.31362 0.7374732 0 0.211180225  
0.2273368 0.4434665 0.5976002 0.948475346 0.736752 0.167855316  
0.7580809 0 0.8978895 0.1323311 0.3846281 0.440988 0.408969  
0.090635556 0.4414112 0.0868446 1.032075 0.09212145 0.664194 1.358876  
0.2103932 0.6380499 0.977847191 0.1143069 0.1028898 0.367649001  
0.6260601 0.134609156 0.4451295 0.6595697 0 0.30164 0.4055334  
0.4986292 0.25254775 0.637114468 0.03666132 0.09916607 0.5607439  
0.314480373 0.3806245 0.3190763 0.07269154 0.425892768 0.4619898  
0.534349 0.143153488 0.4795907 0 0.234724289 0.2172779 0.187015076  
0.03616472 0.3869222 0.118004858 0.7478686 0.193372 0.518838684  
0.9752023 1.067956117 0.358566109 0.2964604 0.461518648 0.5058975

0.1776835 0.1397973 0.1078459 0.3685043 0.914651497 0.391385  
0.579166 0 0.1597203 0.07494713 1.57434 0.2680933 1.124017 0.6536803  
1.3993 0.07248966 0.573081536 0.512484464 0.2488587 0.121041208  
0.506858815 0.4399113 1.365859431 0.6615182 0.06367379 0.517690312  
0.284905669 0.22148093 0.617334411 0.2871081 0.6990323 0.4109289  
0.3272649 0.3405254 0.9959242 0.43028784 0.3500894 1.195294  
0.417293233 0.526625 0.4326848 0.372675066 2.026862 0.5313905 0.132247329  
0.562519 0.1202489 0.253765672 0.4692465 0.2990803 0.3231985  
0.313163756 0.4732453 0.6324522 0.110177391 0.1043736 1.160739626  
0.2267427 0.3687274 0.157830567 0.370687 1.144670177 0.3011513  
1.633761 0.1105845 0.1860778 0.2028367 0.156886708 0.3531332  
0.07335249 1.766166 1.009753 0.5106117 0.0984718 1.219601 0.8496889  
1.326320592 0.283654836 0.8040887 0.2865627 0.4715189 0.1108481  
1.087268758 0.1671173 1.011154772 0.5810026 0.4751341 0.246577433  
0.641616348 0.1296586 0.1615758 0.399275749 0.278682 0.1952565 1.144  
0.8871715 0.5100079 0.8358852 0.2793868 0 0.1299773 0.5825435  
0.4910693 0.02817844 0.3213088 0.491602286 1.318764 0.2243381  
0.138410704 0.02986571 0.6092814 0.2789204 0.3981314 0.1480962  
0.639689525 0.73533 0.1238293 0.2204582 0.1555684 0.6380975  
0.030502026 0.03756875 0.04359569 0.1845635 0.585543184 0.267947153  
1.330978 0.270284 1.352008 0.38721666 0.7928906 0.3048497 0.283084178  
0.6850164 0.4430565 0.145656 0.786132 0.2320494 0.8188788 1.270501876  
0.4653021 0 0.5302935 2.050208 0.8855922 0.1969766 0.0980367  
0.4419867 0.2237663 0.227750312 0.4203009 0.8617982 0 0.9810259  
0.08928574 0.434964 1.048281 0.2362465 0 0.4693757 1.099951 0.588535646  
0.03301376 0.398245946 0.6029743 1.089537 0.4825509 1.00881771  
0.037327264 9.226311 0.2998147 0.951848 0 0.1948195 0.234860652  
0.4535241 9.574924 0.1700008 0.868893984 0.3408154 0.03158727  
0.072429191 0.02923988 0.236878226 0.09868405 1.933588 0.548942413  
0.7225992 1.426134 0.4146329 0.582605999 0.109186 0.1023875 0.5875596  
0.7965338 0.2841787 0.420014 0.7221167 0.2893017 0.3736623  
0.529317164 0.1639082 0.055922071 0.408275 0.118809121 1.1746 0.1829744  
0.313744183 0.1189253 0.1211742 0.07431894 0.072880648 0.2991228  
0.08946161 0.080327505 0.956407345 0.08488729 0.2161194 0.4342371  
0.487495656 1.241433194 0.699132668 0.09428773 0.2469701 0.4626308  
0.141767 0.2990079 0.1983796 0.03315533 0.142727 1.089659 0.1168923  
0.2294225 0.278665804 0.4116424 0.2037141 0.9237549 0.2021109  
14.86543 1.045523 0.4516354 0.2962542 0.9248005 0.5181925 1.108007579  
1.340901 0.04401379 0.7921617 0.3263212 0.369671706 0 0.9500792  
1.005047 0.08091305 1.018866 0.2353651 0.2492495 0.809438644 0.2483264  
0.2368072 0.169387688 0.2599881 0.9284795 1.025338 0.3768693  
0.7079144 0.359492546 0.447200047 0.4052635 1.979337 0.7844186  
0.158309219 0.992676143 0.041133118 0.3203668 0.7790918 0.3007274  
0.161126 0.4070747 0.1819971 0.2471958 0.779828266 0.203286358

0.03941289 0.368406209 9.24038 0.10363078 1.089021 0.7041169 0.5596959  
1.166423 0.3845593 0.6421125 1.356608 0 0.3020577 0.2339521  
0.5631881 0.6802097 0.1122853 0.5503408 1.812031516 0.5969678  
0.2349337 0.8200595 0.075862982 0.355716 0.3864127 0.0415389  
0.2596153 0.5285067 0.5431745 0 0.212452021 0.316841588 0.785410712  
0.1130849 0.384353612 0.122475891 0.8759218 1.211467 0.358060825 0.48415  
0.2890485 0.02591882 0.69704453 0.1640305 0.1592295 0.2074346 0  
0.1119133 0.1462956 0.1278161 0.3052675 0.3188334 1.186244  
0.2232552 0.3777679 0.5335467 0.9302734 1.15756 0.060519925  
1.114518 0.7336879 0.8846239 0.5799886 0.1687464 0.1240105  
0.2166812 0.132170852 0.108809609 0.125988214 0.1444922 0.7614059  
0.1761379 0.5141915 1.027793 1.010888927 0.6157569 0.7734694  
0.1434528 0.05078228 0.1633378 0.042518667 0.4415064 0.1540179  
0.4769965 0.293252 1.095858 1.120239 0.4220071 0.774396026 0.2464882  
0.5386082 0.182474611 0.04026446 0.375903 0.6324307 0.6134236  
0.2775608 0.660429372 0.876137733 0.043652654 0.06186221 2.190818  
0.2774379 0.2389558 0.5373926 0.1739971 0.904410092 0.3175754 0  
0.03381153 0.312274 0.8957717 0.8631873 0.1145047 0.984751409  
0.1593985 0.2480898 0.5554981 0.4433576 0 0.4967724 0.8151915  
0.442820022 0.3110826 0.292488253 0.05355519 0 0.601947663 2.081923  
0.06624713 0.4258229 0.632420538 0.2318812 1.283237 1.460163 0.462174908  
0.1055196 0.2020155 0.1702146 0.08574662 0.2370796 0.3784342  
0.2352062  
AC097376.2 1.023557 0.921171069 0.4620089 0.783321814 0.579660598 0.577486093  
0.7762917 0.426665683 0.2890076 0.4419736 0.376683181 0.2834292  
0.571898 1.098765 0.8450561 0.6613934 0.4321547 0.721639725 0.6729777  
0.4519173 0.661550539 0.3796092 0.75939251 1.077627 0.3368378  
0.497545324 0.8284691 0.4060555 1.590131 0.9257758 0.4729392  
0.573554584 0.5015839 0.560510548 0.4976022 0.775751279 0.546995179  
0.762257336 0.7957785 0.934864 0.481750807 0.9788207 0.469888181  
0.6328686 0.475035222 0.7920337 0.7760436 0.4329507 0.490747106  
0.4944019 0.6533241 1.082393 0.556073866 0.5320581 0.471024722  
0.9572749 0.8274089 0.6644428 0.3682446 0.5816327 0.2598691  
0.5240808 1.630927241 0.5780411 0.3736698 0.4868515 0.609103  
0.4592981 0.758666 0.3542351 0.7577458 0.501194794 0.4630982 0.43549  
0.705590527 0.5076662 0.188865751 0.7338424 0.6163304 1.426882  
0.5431341 0.527897 0.777345 0.593522138 0.792604361 0.2057533 0.3600162  
0.766156 0.425192245 0.6427577 0.3822547 0.4827581 0.75548197  
0.671774 0.627897 0.337434764 0.9731142 0.513545657 0.508409446 0.4572833  
0.166183374 0.2714673 0.5009284 0.202821776 0.5674048 0.4092319  
0.423780072 0.4137402 1.017888584 0.325213369 0.3762493 0.412807948  
0.6210823 0.6066349 0.5917044 0.4514233 0.4474354 0.588652348  
0.7504909 0.5775329 0.3884892 0.5322336 0.5170164 0.9806201  
0.5172104 1.834863 0.4110225 0.9799033 1.006908 1.041943504 0.732532561

0.5489658 0.45570782 0.558467566 0.8387003 0.657049086 0.7425238  
0.4422262 0.254224083 0.708114265 0.28278498 0.405521269 0.5773926  
0.4781349 0.7945731 0.3989081 0.8209132 1.266348 0.566828764  
0.6763433 0.5809879 0.483029771 0.9918184 0.6480643 0.407105911  
0.5456588 0.5493723 0.178593749 0.651133 0.7676642 0.347149142  
0.6274018 0.6215767 0.570325 0.8148686 0.8548938 0.5412977  
0.313037321 0.5725928 0.386791599 0.6226363 0.4061193 0.580191037  
0.516384 0.72523181 0.9114697 1.069159 0.5430514 0.5072406 0.1626249  
0.622947134 0.6255306 0.2229901 1.048746 0.8936436 0.6716464  
0.2296953 0.8342015 0.8558085 0.883935813 0.435298195 0.7192217  
0.5092846 0.5470699 0.6402542 0.726952981 0.6594661 0.605219291  
0.7805405 0.2433255 0.524269762 0.596403127 0.3752095 0.2697751  
0.478513462 0.5645202 0.6164057 0.3907175 0.6878946 0.8493571  
1.075744 0.3848713 0.2951539 0.1884458 0.5216603 0.8427042  
0.559438 0.3749986 0.678255405 1.063058 0.47529 0.218474526 0.3184675  
1.120974 0.7362162 0.8353688 0.602588 0.722296079 0.7782741 0.5194854  
0.6031695 0.2701128 0.904247 0.3059943 0.3874295 0.5963851  
0.3643867 0.708103625 0.256897786 0.835907 0.4533484 0.3456679  
0.751552779 0.7115231 0.5955244 0.321720862 0.7231316 0.7292295  
0.3780757 0.473221 0.7183131 0.4465208 0.873016956 0.5853891  
0.505273913 0.5899156 1.019879 0.7314076 0.3979749 0.4401668  
0.5829291 0.536347 0.205931637 0.6872397 0.8732831 0.324791852  
0.5691789 0.4635135 0.6015656 0.4944964 0.4167049 1.007483  
0.7197184 0.7490677 0.784467554 0.3844605 0.465638333 1.090056  
0.8353221 0.6025759 0.807633116 0.439930474 5.79916 0.4627263  
0.7560693 0.2924756 0.3612058 0.411906726 0.6514756 6.223226  
0.3677223 0.670514367 0.4211725 0.2238113 0.706280223 0.3671785  
0.50407353 0.2146136 0.8422306 0.59931447 0.8354921 0.5615605  
3.86869069 0.901903971 0.3561793 0.5692394 0.6759965 0.6838591  
0.8264418 0.7857441 0.7711414 0.5461332 0.3591274 0.491471327  
0.3863568 0.52373684 0.6444421 0.773058415 0.7654724 0.5540992  
0.467717079 0.3420634 0.2592737 0.4249186 0.35022844 0.3217619  
0.1945571 0.278005476 1.060104314 0.2421753 0.7530216 0.8986645  
0.681709414 0.634757487 1.03772113 0.3373448 0.7301582 0.425162  
0.2656852 0.4941111 0.7066742 0.5512522 0.6628463 0.6323944  
0.4838229 0.4327702 0.361662949 0.5045175 0.5859406 0.6883682  
0.652223 5.631446 0.929062 0.5272176 0.6423909 0.741712 0.265831 0.924129027  
0.7231537 0.3489119 0.8210436 0.4861297 0.627124512 0.6721701  
1.037855 0.9821852 0.2213766 0.8716211 0.5840998 0.4925138  
0.614117727 0.2787349 0.5465619 0.758822038 0.4351315 0.686433  
0.5568846 0.6231969 0.6904702 0.55640782 0.441177127 0.4305206  
0.905242 0.5874092 0.419248747 0.730014998 0.649266146 0.5312229  
0.7935231 0.5970463 0.7030797 0.8048069 0.4575096 0.5159132  
0.87304196 0.730887807 0.4036823 0.597018149 5.34261 0.461648155

|             |             |             |             |             |             |
|-------------|-------------|-------------|-------------|-------------|-------------|
| 0.6246703   | 0.5543349   | 0.7246096   | 0.8623468   | 0.8568769   | 0.8305423   |
| 0.7063775   | 0.3843228   | 0.4635393   | 1.001164392 | 0.9805552   | 1.782305    |
| 0.3150878   | 0.2625362   | 0.892730067 | 0.60725     | 0.2224988   | 0.5935406   |
| 0.486080089 | 0.4919637   | 0.8313169   | 0.4108873   | 0.4006836   | 0.8712985   |
| 0.6232975   | 0.4432366   | 0.698014667 | 0.618328885 | 1.072984765 | 0.444264    |
| 0.368503978 | 0.244874792 | 0.7347149   | 1.356886    | 0.422002187 | 0.7862214   |
| 0.3024761   | 0.4054793   | 0.743280473 | 0.4391952   | 0.5724874   | 0.3367804   |
| 0.322054289 | 0.2852566   | 0.8128401   | 0.3245958   | 0.2046375   | 0.8499551   |
| 0.6780809   | 0.5464335   | 0.2451407   | 1.303448    | 0.6704169   | 0.6340373   |
| 0.358759743 | 1.324192    | 0.49755     | 0.4784576   | 0.603541    | 0.2469096   |
| 0.5387881   | 0.761868418 | 0.517160281 | 0.680564449 | 0.3993826   | 0.7365675   |
| 0.5313369   | 0.6024069   | 1.081547    | 0.574674486 | 0.4660775   | 1.076186    |
| 0.3206294   | 0.2788283   | 0.43101869  | 0.7889048   | 0.7865948   | 0.5916852   |
| 0.4937429   | 0.7092007   | 1.156125    | 1.151912    | 0.70107055  | 0.5168382   |
| 0.264558363 | 0.4124044   | 1.21306     | 0.6211401   | 0.7762011   | 0.6075211   |
| 0.90897704  | 0.832128339 | 0.349111468 | 0.2690703   | 0.6670606   | 0.5092873   |
| 0.3000677   | 0.7021607   | 0.3505004   | 0.593686635 | 1.087215    | 0.276295469 |
| 0.2680352   | 0.6912899   | 1.178277    | 0.5736838   | 0.1751171   | 0.573138361 |
| 0.6821228   | 0.5221301   | 0.3875357   | 0.6862107   | 0.3626462   | 0.5430832   |
| 0.7313188   | 0.612677186 | 0.738031    | 0.538230206 | 0.5165982   | 0.6108559   |
| 0.719646821 | 0.8009409   | 0.5112207   | 0.5616108   | 0.509392454 | 0.3920408   |
| 0.7675682   | 1.508787    | 0.430146896 | 0.6884379   | 0.5479867   | 0.2695283   |
| 0.3368633   | 0.3611506   | 0.5252798   | 0.2788586   |             |             |
| AL031846.2  | 0.1507212   | 0.359053037 | 0.2269025   | 0.939743009 | 0.349217483 |
| 0.855141557 | 0.3373372   | 0.659065986 | 0.1565491   | 0.08752528  | 0.095003216 |
| 0.4185332   | 0.2933785   | 1.651732    | 1.003401    | 1.098408    | 0.3073164   |
| 0.3731146   | 0.3023922   | 0.535253055 | 0.5887395   | 0.78692322  | 1.24763     |
| 0.3263469   | 0.672109773 | 0.7393563   | 0.1316244   | 0.217358    | 0.710315    |
| 0.260503045 | 1.108238    | 0.919205136 | 0.7682441   | 1.477395909 | 0.448107325 |
| 1.478925714 | 0.5970178   | 1.071048    | 0.703875442 | 2.234366    | 0.192012425 |
| 0.372287177 | 0.8094854   | 0.5077359   | 0.01914448  | 0.304948617 | 0.264927    |
| 0.9849039   | 1.816731    | 1.374766975 | 0.7641528   | 0.193909241 | 1.705403    |
| 0.9509655   | 0.1005731   | 0.2273612   | 0.1474685   | 0.8827313   | 0.812831323 |
| 0.5647201   | 0.1364059   | 0.8817606   | 0.2345446   | 0.623782    | 1.906304    |
| 0.4364324   | 1.853386251 | 0.07384332  | 0.0364921   | 0.698543118 | 0.6157573   |
| 0.034101475 | 0.8626733   | 0.2245735   | 0.1093742   | 0.2292497   | 0.09588749  |
| 1.486379    | 0.177543614 | 0.865128903 | 0.1003068   | 0.1205877   | 0.3490547   |
| 0.538855551 | 0.6364134   | 0.1529625   | 0.2578164   | 1.290108532 | 0.785226    |
| 0.7269388   | 0.300283062 | 0.2859877   | 0.179056069 | 0.240830573 | 0.2642137   |
| 0.10423123  | 0.2253818   | 0.2887185   | 0.107621973 | 1.553595    | 0.4555909   |
| 0.135196475 | 1.231745    | 2.306229059 | 0.529456063 | 0.1802505   | 1.139967403 |
| 0.3412327   | 0.2880883   | 0.1629128   | 0.202178    | 0.6937051   | 0.755592504 |
| 0.3833889   | 0.7640137   | 0.2227036   | 0.08497241  | 0.3417638   | 1.138503    |
| 0.3178559   | 0.2497083   | 0.5188844   | 1.412913    | 0.8484312   | 0.783986781 |

1.275592119 0.2563834 0.153321061 0.44413395 0.4012049 2.05240883  
0.7038654 0.08710699 0.068853799 0.835192591 0.282790906 0.840260301  
0.2763934 0.6065357 1.350743 0.7586109 0.7387649 1.13537 0.654046894  
0.6999734 1.700074 0.386919833 1.052941 0.707017 0.242774667 1.278563  
0.2168104 0.170865998 0.6127795 0.304635 0.389586645 1.065702 0.8012476  
0.2569714 1.345826301 1.236371 0.8411735 0.09629642 0.1078821  
1.31223496 0.5612934 0.2522131 0.499004274 0.2817262 1.533307685  
0.5754653 2.201659 0.2815522 0.2909235 0.1013039 0.448325883  
0.1878695 0.2341445 1.927167 1.511234 0.2069709 0.04864577 0.885714  
1.342285 1.008018101 0.075453268 0.5500046 0.329106 0.3307934 0.07862935  
1.487404986 0.3683318 1.154368049 0.8698896 0.7944356 0.164336732  
1.497040727 0.1182503 0.1522712 0.611965405 0.3547673 0.2247156  
0.2425315 0.943964 1.284174 1.033976 0.5752403 0.1911947 0.06256329  
0.9063135 1.142621 0.1070796 0.1997985 1.428070493 2.0575 0.2523392  
0.268243789 0.1498086 0.6632221 1.139406 0.5611562 0.4352116  
0.699160213 1.098279 0.3802111 0.8880182 0.01182337 0.8212008  
0.157636731 0.03997373 0.1325328 0.2324478 0.707792442 0.149338021  
1.425814 0.3921632 0.4155831 0.941724419 0.9039082 0.7449695  
0.408779414 0.922241 0.8910335 0.1151282 0.08480204 0.2028141  
0.3055206 1.29241213 0.5941062 0.093305377 0.4893922 2.759396  
0.5629227 0.2305447 0.3352903 0.3291964 0.1417207 0.223097282  
1.56768 1.084349 0.074076887 0.3748103 0.217146 0.8547787 1.140113  
0.2975398 0.3183433 0.2802884 1.570001 1.392201032 0.1856721  
0.456024696 1.057539 1.529939 0.6259097 1.253800362 0.312060397 1.643239  
0.6892839 1.605514 0.05069684 0.4568861 0.237995539 0.5186663  
2.889415 0.3531533 0.468861916 0.322783 0.1680467 0.117433545 0.1466693  
0.636106116 0.1087514 1.824871 0.787469181 0.9356456 0.6782976  
1.38655228 0.791112608 0.2074564 0.3307165 1.169966 1.326058 1.044553  
1.374754 1.335454 0.1719003 0.1987912 0.567934323 0.03986304 0.068002213  
0.2482347 0.288947924 0.7423576 0.2271355 0.325880297 0.2756727  
0.1197218 0.1016698 0.177248278 0.1566096 0.2221065 0.085469691  
0.988556804 0.3225763 0.2153541 0.5582922 0.558223029 1.437027272  
1.258456844 0.2149791 0.2949571 0.01406418 0.09235239 0.1817994  
0.1675229 0.2671032 0.2212872 1.174471 0.2949468 0.3448524  
0.437697365 0.5373705 0.0442357 1.123302 0.4476531 3.117059 0.4105481  
0.5354666 0.3356878 1.105577 0.4627526 1.866650196 0.6942617  
0.2943685 1.126419 0.2713496 0.648749539 0.03325112 0.5879717  
1.414005 0.1639861 1.165826 0.263848 0.2683625 0.510373372 0.4735426  
0.2483669 0.099311005 0.1806572 0.5970923 1.176443 0.2373234  
0.8608362 0.310785762 0.169938454 0.3520053 1.562176 0.7154 0.072190039  
1.071831759 0.425158 0.4604029 0.3947455 0.7313795 0.1665422  
1.209399 0.2904715 0.2348394 2.301566154 0.332174671 0.1437803  
1.10317137 4.108332 0.236281566 1.134392 0.6718936 0.6728659 1.357018  
0.6402088 0.5978153 0.7835879 0.067851 0.3041764 0.802667741

1.369693 0.124072 0.2858825 0.4461493 1.552439076 0.9527742 0.0476139  
1.304273 0.284439686 0.3977978 0.2819308 0.1578501 0.2170415  
1.429948 0.2064093 0.1177223 0.688920963 0.516632018 1.376059296  
0.2320535 0.321324226 0.209436776 0.4688915 0.171446 1.175602155  
0.3461543 0.373456 0.1260709 0.863511144 0.282574 0.187575 0.1306264  
0.079424267 0.1247479 0.5381416 0.209826 0.2216952 0.1561597  
0.7279248 0.482635 0.2225085 0.8777911 0.5527595 0.710574 0.234578593  
0.2198714 0.05576108 0.477133 0.7542537 0.2271841 0.2111185  
0.1317441 0.08036103 0.289437711 0.11969052 0.3997289 0.5969508  
0.2027125 0.2891854 1.506937 0.794779241 0.6403963 1.401031 0.152636  
0.1543803 0.03310359 0.109869812 0.4223978 0.7397892 1.288603  
0.855839 0.6288121 2.826628 1.446201 0.81275872 0.2622672 0.9239571  
0.300479168 0.2539918 0.7745384 0.8136789 1.667991 0.4176795  
1.539262791 1.449556964 0.358306119 0.01880638 1.359501 0.2846554  
0.3486893 0.4952143 0.1700224 0.726639326 0.2799785 0.030858388  
0.03083656 0.6645286 0.3801112 0.7872381 0.03480993 0.504491732  
0.2826706 0.2168336 0.4128027 0.3664403 0.06080208 0.5285734  
1.145237 0.815194145 0.7221745 0.235973906 0.1058266 0.1041682  
0.636669106 2.051865 0.3423701 0.4142465 0.961292999 0.1198379  
1.396182 1.51202 0.304423571 0.4049901 0.2917145 0.04804983 0.1042694  
0.9678404 1.224414 0.3253419  
AP001107.4 0.3519517 1.474447006 0.3333169 1.900714372 0.542450475  
0.529469498 0.2552803 0.391635094 0 0.1753276 0.41175538 0.5061688  
0.4995327 2.576712 1.401831 1.608817 0.3924485 0.176506187 0.1460456  
0.3269081 0.247151217 0.6486383 1.278982501 2.717008 0.8486562  
0.725160999 0.4258947 0.04718223 0 1.533101 0.6315968 0.378113288  
0.4139194 1.479751281 0.3864787 1.839813511 0.684549924 1.53389986  
1.274463 1.007212 0.8443849 1.215209 0.121651225 0.8918084 0.536941876  
2.756606 1.212569 0.5215538 0.218624426 0.1569004 1.249769 1.771634  
1.402727917 0.7178568 0.173772293 1.648088 0.4159137 2.308859 0.09133059  
0.7521299 0.04565331 1.495961 0.938305018 0.2284856 0.05993728  
0.7368663 0.1430532 0.5893776 2.87217 0.2541113 0.5189968  
2.293207349 0.1775044 0 0.788403941 0.1906262 0.046451397 0.9504422  
0.1638768 3.426638 0.416364 0.3265334 1.175803 0.130725088 1.890776073  
0.03795365 0.1539926 0.6357971 0.266372143 0.2533125 0.1016381  
0.1003386 2.204528428 1.304387 0.3595703 0.177839658 0.03819204  
0.435538583 0.182248822 0 0.032267907 0.1871977 0.6190494 0.061082292  
1.462437 0.1000942 0.230197709 1.033616 2.020583084 0.185602866 0.05580196  
1.702117591 0.7201296 0.8890769 0.6753845 0.1116475 0.4988771  
0.905724109 1.665746 1.263405 0.2313734 0.2755842 0.2586302 0.6173622  
0.3330524 1.342661 0.6767229 1.293416 0.6003597 1.631528046 1.525330615  
0.2290054 0.208846611 0.740789398 0.2946825 1.454406798 0.1369674  
0.1647958 0.066992392 1.51687916 0.275145883 0.871494184 0.2972288  
0.4221429 0.9040054 0.2541008 2.563848 1.804304 0.371213072 0.3345509



0.9722654 1.33920934 0.838752 0.9406679 0.33069603 1.940936 0.5211684  
0.376500048 1.45587 0.6224389 0.236439927 1.028727 0.928869 0.386067  
0.618932854 1.377921 0.5565345 0.085545896 0.1728844 0.563276361  
0.8048073 0.2672076 0.392146002 0.5208089 2.888487059 1.157992  
2.271966 0.1144827 0.3577547 0 0.682151554 0.3655813 0.0759382  
3.624197 2.41234 1.233426 0.07645723 1.262592 1.47654 1.671568357 0.07341345  
1.040541 0.2307388 4.994049 0.7267849 0.758054103 0.5190247 1.737239975  
0.751854 0.1475648 0.196361079 1.262043882 0.3691301 0.03345428  
0.447796271 0.1081896 0.1443853 2.150488 1.256819 0.6657214 1.85006  
0.5521765 0.2245141 0 1.383533 1.642457 0.116687 0.06047911 1.187506821  
1.725883 0.9754339 0.179112181 0.1545925 1.241171 1.263292 0.4496353  
0.4088444 2.081322186 0.9598379 0.1281944 1.103109 0.04026306  
1.277142 0.09473171 0.583396 0.3159272 0.05459126 1.068038217 0.184928276  
1.530995 0.178062 0.7464889 1.469842833 0.7182353 0.8011278 0.43959454  
0.6753938 0.9526315 0.09047427 3.071603 0.3603439 0.1926692  
1.956068822 0.3211361 0.084730745 0.2156733 1.582212 1.416888 0.1223521  
3.197015 0.3431752 0.7721804 0.471557232 0.903704 6.146108 0.056057772  
0.9881587 0.06932483 0.1929843 0.5800388 0.4192702 0.1548686  
0.6594648 1.444236 1.827845403 0.3075976 0.38479868 0.4801765  
1.101088 0.5661692 1.474417415 0.695575204 2.894407 0.892352 1.239698 0  
0.4898112 0.162093066 0.201219 1.384827 0.1173289 0.62966603 0.3528293  
0 0.274935296 0.0302706 0.204356911 0.05108136 1.015812 1.030030859  
0.6926585 1.071585 3.43399119 0.924819467 0 0.1854943 0.7299257  
0.9816809 0.5349021 1.536363 1.557441 0.4900904 0.07736682 1.450524281  
0 0.1157867 1.197556 0.122997197 1.184005 0.09471217 0.595473653  
0.5232491 0 0.1154081 0.377248624 0.2408521 0.06174345 0  
1.138639319 1.083848 0.1740182 0.3184271 0.504680104 0.766173519  
1.714209675 0.04880571 0.1826257 0.04789388 0.1677307 0.1031827  
0.1597342 0.3432407 0.08865494 0.8716906 0.07260767 0.1583398  
0.192325935 0.5013564 0.3012788 1.296342 0.38858 4.024932 0.5411893  
0.243129 0.2788157 0.569265 0.3352869 1.52942048 1.127887 0.0911306  
1.428536 0.1391041 1.217690745 0.1358793 3.056092 1.6696 0.111687  
2.343959 0.1522886 0.1720238 0.775899751 0.07011272 0.09806189  
0.501024807 0.4229544 1.183026 0.9587576 0.1950771 0.9929189  
0.279123619 0.49189931 0.4794848 1.65505 2.285126 0 1.06310528  
0.553580029 0.2110563 0.4480862 0.684922 1.16764 2.298678 0.1256084  
0.06397738 2.119208632 2.525427554 0.1224066 1.029760288 2.790115  
0.16092572 1.027932 0.8504269 0.2897127 1.81131 1.895786 0.8517074  
0.9987049 0.1680425 0.2736172 0.76119692 2.809196 0.07041874  
0.1162434 0.4557925 2.259614609 0.3090056 0.1621435 0.973206  
0.602118438 0.3682551 0.2666893 0.1720126 0.3023627 0.8480621  
0.3414095 1.181568 0.953077896 1.818966769 1.283837059 0.1463389  
0.26526817 0.158491529 0.6702424 0.3027312 0.518955689 0.5569073  
0.1994917 0.1878273 1.334988995 0 0.0412106 0.1227124 0.077277096

0.1158583 0.2726147 0.1587861 0.807628 0.3300724 1.682896 0.1540834  
0.2444277 3.83399 1.780213 1.267501 0.125306561 0.9328637 1.308115  
0.6794699 0.2335019 0.1996512 0.1540583 0.0747731 0.091219957  
0.140806498 0.228251376 0.1495856 1.120139 0.1562973 1.011402 1.352196  
1.551741341 0.2348546 2.335476 0.3182348 0.05257238 0.2254606  
0.154061145 0.9410259 1.466913 0.4938108 0.3946661 1.021038 2.706032  
0.9531994 0.916221537 0.113412 1.234673 0.062968975 0.0208419 0.4756324  
1.449746 1.081932 0.9195039 0.748825034 1.779158527 0.497105731 0.03202144  
1.332769 0.382957 0.2226412 0.6954199 0.1029317 0.96972993 0.263016  
0.042033819 0 1.077606 1.352383 0.7760342 0.1185411 0.792916719  
0.6050635 0.4173569 0.3514376 1.204839 0.3185449 0.6857118  
1.176384 0.86592264 2.166507 0.489136199 0.08316456 0 0.934749896  
3.198204 0.720115 0.08816667 0.169740577 0.02400552 1.328472 1.511634  
0.510364574 0.2184785 0.06971221 0.1510412 0.1479487 0.4558111  
0.8675 0.2434973  
AC138028.4 0.07711462 1.208190861 0.5931054 3.082350894 0.950831889  
0.736570033 0.7737449 0.818490405 0.155743 0.2356136 0.653006094  
1.439812 1.013857 2.818272 0.7593411 2.961007 0.6114681 0.687529069  
0.6826545 0.6685225 1.037917899 1.136963 1.370024796 5.206061 1.251442  
1.072486588 1.324721 0.2343256 0.2208396 1.423268 0.1014834 0.603294452  
1.835181 1.895451266 1.103007 3.337714342 2.074844848 2.188294519 1.223347  
1.943819 1.663096484 2.485086 0.284314408 0.07960753 0.871459414 1.503259  
1.390724 0.4380557 0.423133061 0.2864814 2.779297 5.816466 2.643172758  
1.12722 0.548272777 3.507881 0.2430108 2.172455 0.2201216 0.4136055  
0.3734416 3.174663 1.178704357 0.4672499 0.3852229 1.883602 0.3691599  
1.743336 2.217564 0.2333141 0.7718847 6.476083844 0.2679242 0.09335366  
1.215163215 0.7907938 0.217125664 1.363073 0.2234172 0.07254066  
0.3953201 0.5587349 1.516427 0.668327582 1.554352111 0.5322151  
0.3748961 0.3876362 1.858990412 1.068932 0.2598107 0.3224431  
1.499676764 1.87992 1.599919 0.415633932 0.5913452 0.687088672 0.514675941  
0.3723754 0.24509618 0.3828168 1.159566 0.321203466 3.493296 0.3411522  
0.425917749 1.502786 2.639621056 0.914031239 0.3015877 2.660767569  
0.535511 1.038943 0.7751364 0.3805294 0.9773315 1.298940917 0.6050028  
2.020624 0.1502081 0.1690698 0.7404532 1.890139 1.159471 0.2876472  
1.112969 2.788605 1.490812 1.617674059 3.371147804 0.6355675 0.963999731  
2.082993385 0.610448 3.22209571 1.940668 0.1733169 0.136998534 1.390974993  
0.515780468 1.536081321 0.4148673 0.5285366 2.376873 1.323826 2.602792  
1.571921 1.995416132 1.36016 3.003922 2.397909406 1.114904 2.604129 1.086860734  
1.60913 0.6766872 0.849931003 2.169128 0.5940102 0.452816989 2.312436  
1.809071 0.5188155 1.334591438 1.950117 2.85961 0.274906026 0.2462198  
1.42615265 1.841751 0.5352842 0.668277717 0.4724645 2.726269337  
0.5464794 5.250875 0.5769274 0.4582571 0.3067286 1.072339779  
1.076913 0.2514261 4.635723 2.161213 0.4632868 0.156354 2.459033 3.276483  
2.040536494 0.096511828 1.611119 1.001494 3.949081 0.6257959 2.194453639

1.048763 2.583141002 2.178901 1.724389 0.309771575 2.16365552 1.401894  
0.3127477 1.237754822 0.5162414 0.5820957 2.467457 2.125339 1.03278  
1.813217 1.567044 0.1180616 0.2162061 2.725668 5.243846 0.1278339  
0.2473579 1.643736859 2.250092 1.750494 0.418607981 0.4064651 0.3923178  
2.140544 0.6567844 0.5374808 1.418758556 1.624432 0.4344296 1.644654  
0.01176249 1.106451 0.138375045 0.1022603 0.2637008 0.3189668  
1.990166752 0.378175819 2.996684 0.8025817 1.244873 1.766400554 1.588682  
1.028367 0.659240911 1.124668 0.7215254 0.1409666 1.664299 0.4474026  
0.8442986 3.950871499 0.8912615 0.222779862 0.3035792 5.050695  
3.530587 0.2859524 1.660407 0.7886768 0.7218736 1.431185429 1.975178  
1.245287 0.147390922 1.234916 0.2092771 1.437655 1.027651 0.8982306  
1.040599 0.9632832 5.200981 1.713212912 0.3394781 0.923412551 2.188356  
3.671778 1.002137 2.467767855 1.16278978 0.2254866 1.836182 2.358726 0  
0.6397139 0.414347654 0.3461743 3.364274 0.5312869 0.814641091  
0.1665072 0.2483838 0.481919104 0.1414925 1.026857481 0.328305  
2.452637 1.359301914 0.6070617 1.39135 0.25080234 2.290636268 0.297199  
0.3328843 2.274572 1.433946 1.672055 2.625258 2.038365 0.9465489 0.5650504  
2.1187875 0.2082034 0.456651447 0.2263769 0.341358888 1.533162  
0.4150395 0.83027424 0.9171748 0.348154 0.5619237 0.264503426  
0.5528502 0.342718 0.380608698 1.648752954 0.1625971 0.4502781  
0.7660931 1.317110214 1.89895025 3.22731845 0.299421 0.4374899  
0.1679011 0.392008 0.3918705 0.96663 0.3609888 0.2503641 2.681383  
0.4737273 0.5550904 0.800654433 1.801541 0.360865 2.607542 0.5152066  
5.372009 1.34388 0.803162 0.5783197 2.048582 0.9305347 3.239345734  
5.018569 0.545771 3.30003 0.3541311 1.361965648 0.1058557 4.617981  
1.788448 0.3833831 5.204224 0.3470199 0.7412641 1.224029169 0.3618627  
0.4440423 0.636708842 0.9772654 2.570477 2.610861 0.3745056 1.685182  
0.543622875 2.172465107 1.295713 4.593324 1.031713 0.215454985 3.561277842  
0.908138979 0.8103647 0.4538016 1.346085 0.3313693 1.790767 0.4586918  
0.5700576 2.761416271 1.42945017 0.2503199 2.440107079 5.216683  
0.47012988 1.937427 2.590921 0.8540636 5.725759 2.303961 0.4551559  
3.027037 0.2700065 0.2398043 1.425232932 2.740765 0.2674385 0.3820439  
0.7434523 2.690324397 0.8745214 0.130264 2.01439 0.963644907 0.7684457  
0.3973454 0.4773934 0.4024037 1.934077 0.6219064 0.3082004  
1.766979002 1.620318046 3.113009133 0.1624561 0.649026383 0.203728189  
2.02716 0.2400519 2.353536714 1.258178 0.386103 0.3057156 3.05679528  
0.08268206 0.08427512 0.1523596 0.270909624 0.1692348 0.5663425  
0.3247153 0.7180819 0.4714241 0.5182182 0.7127225 0.3855997  
3.217815 1.099827 2.517965 0.530804027 0.2151534 3.809212 0.6818077  
1.266858 0.4884826 0.2850427 0.2766942 0.146569953 0.386672197  
0.609660043 0.3933007 2.484588 0.3805071 0.9330694 3.380436 2.88864274  
0.6272974 2.660923 0.3594818 0.2457367 1.391425 0.289334346 0.8404458  
2.487426 0.95082 0.9667304 0.6545745 3.214874 1.125477 2.074409982  
0.5715321 2.408536 0.561072341 0.2557284 1.717948 2.220118 1.690323

0.4616988 2.225669995 2.894377711 0.330056651 0.01870955 2.534232 1.19569  
0.3541208 1.483072 0.4736115 1.514177871 0.5378642 0.147357583  
0.0409037 1.500608 0.1354582 1.243477 0.2216364 2.1730359 0.9641663  
0.4689502 1.521372 0.9218594 0.27918 1.565035 2.540168 1.4508656  
2.659998 0.741701918 0.3806337 0.03657594 1.608130099 4.986459 0.641143  
0.7211986 1.119275806 0.2594808 3.738026 3.201674 0.680261344 0.7818746  
0.2240237 0.07354218 0.3630637 1.136991 1.602346 0.3770183  
AC092118.2 0.02370089 0.726521132 0.1958924 0.626922281 1.112739775  
0.794601151 0.3610092 0.511234879 0.04786704 0.0283363 0.02376699  
0.3875049 0.339933 0.9395432 1.486819 1.473422 0.184996 0.309040193  
0.1180189 0.1056692 0.249652373 0.8100685 2.214729818 0.7318678  
0.6857956 0.402874772 0.2226942 0.03812777 0.2290756 0.7708666  
0.1275977 0.094015944 0.9641084 1.042475761 0.2402399 0.422162402  
1.060265543 0.970971643 0.5639867 0.8632524 0.506255241 1.473008  
0.098305863 0.1201111 0.168739105 0.6534299 2.104911 0.8429311  
0.309171649 0.2218835 1.009933 1.249854 1.756985064 0.471329 0.252764436  
0.4439376 0.1440421 2.42309 0.1476078 0.6077931 0.1844613  
0.6158447 0.720328462 0.2461843 0.04843507 0.6550046 0.0963339  
0.4564289 0.8289247 0.05867037 0.2287632 2.287198432 0.1912541  
0.0286919 0.30756843 0.2156619 0.056305779 1.280081 0.08828544  
0.04013119 0.168231 0 0.6025414 0.105638414 1.98986036 0.2760317  
0.165921 0.4914466 0.526177057 0.2047008 0.3285334 0.2027081  
1.552424292 0.3162209 0.4470266 0.622749866 0.2160398 0.633522539  
0.147274535 0.1211805 0.130377826 0.2117832 0.1765593 0.493603527  
1.204962 0.5662001 0.124014558 0.5438909 0.67777642 0.321396266  
0.1578267 1.037638534 0.5025792 1.957183 1.169519 0.2706657 0.7114245  
0.898255619 0.9095155 0.9690394 0.2492959 0.08907938 0.0417996  
0.8780426 1.996109 0.03616662 0.8506665 0.5853144 1.637375 0.759096757  
0.714558548 0.2775875 1.620173765 0.374143071 0.1515384 0.979416872  
0.276707 0.07990249 0.135340702 2.077022735 0.055586069 0.563400738  
0.2135017 0.2192991 0.9238969 0.8897974 2.020039 0.7029889  
1.699862758 0.7659896 0.8809181 0.558559818 0.6100129 0.5429642  
0.111347551 0.8902086 0.1403847 0.248930317 0.1568644 0.2682615  
0.127377432 0.808218 1.688884 0.1455903 0.833595223 0.5691183 1.084651 0  
0.08731701 0.515872193 0.5148695 0.2467765 0.158445798 0.2436578  
1.286788617 0.3599109 4.651115 0.09251297 0.378054 0.5817924 0.55124391  
0.09847492 0.3886472 1.688619 0.8122511 0.03559737 0.1441645  
0.5101479 1.218573 0.699515019 0 0.5886002 0.2130961 1.820603  
0.1236446 0.519765232 0.943699 1.457851076 0.5589646 0.1192466  
0.253885749 1.207720128 0.21694 0.02703427 0.222684526 0.2914253  
0.163348 0.4785248 1.035162 0.3895621 0.4822664 0.3187226 0  
0.1449821 1.003358 0.6004286 0.1178678 0.04887292 0.845379044 1.12407  
0.8257796 0.057895931 0.3248064 0.3288475 0.8750238 0.3633485  
0.1651927 3.032531152 0.6419099 0.08287469 0.7377251 0 0.2135283

0.280691808 0.377152 0.6564844 0.1102874 0.699792454 0.074719896  
1.095797 0.164447 1.181334 0.971815127 0.2763824 1.726368 0.213140741  
0.3001807 0.7413059 0.07311189 1.972991 0.1941283 0.4670857  
0.844852245 0.2595088 0.068470572 0.1584407 1.99583 0.6735184  
0.1318296 1.353259 0.184879 0.6239959 0.48691446 1.379417 2.162894  
0.158550205 0.7763457 0.05602111 0.3118997 0.6955303 0.4235132  
0.1564358 0.1121917 1.548627 0.953943929 0.1380936 0.222110183  
0.6596488 0.6293599 0.8612123 1.340404587 0.874364566 0.3118611  
0.8778682 0.9504209 0 0.1862656 0.229226813 0.07226857 0.7067829  
0.189626 0.399795448 0.2412553 0.07927599 0.242371745 0.07338465  
0.297251987 0.08255728 1.062307 0.459235182 0.4253983 0.5965389 0  
1.007288212 0.09134303 0.1070694 1.1797 0.3807803 0.7564413  
0.7964524 0.5034247 1.562158 0.343859 0.494913182 0.1096981 0.023391691  
0.02846295 0.17393869 0.905071 0.07653652 0.568690731 0.9700343  
0.07602906 0.3419563 0.335338395 0.1390226 0.02494732 0.089600695  
0.360050801 0.1183586 0.2209797 0.09081871 1.386621827 1.857425158  
1.477595626 0.1183191 0.1475791 0 0.05082843 0.1945568 0.0922004  
0.08321143 0.1194028 0.7872814 0.1760219 0.1066281 0.388544525  
0.5874589 0.6573478 0.4636779 0.09661843 0.510201 0.6559993  
0.1209056 0.1802479 0.3972906 0.67736 1.364660009 0.6309977  
0.2577479 0.9833731 0.3211698 1.293271549 0.4392139 3.037344  
0.5083931 0.2030711 1.041779 0.09845105 0.1216353 0.476521101  
0.2077453 0.138676 0.141706641 0.1553581 0.4182494 0.5534058  
0.4954431 0.6686448 0.131575889 0.748238759 0.508554 1.114533 0.4425739  
0.066219298 0.429545537 1.789383122 0.6578502 0.07241933 0.6289576  
0.8357293 0.619184 0.1776313 0.1550996 1.087316773 0.637746182  
0.09891631 0.986246068 1.09513 0.17339123 0.4287319 0.7526767  
0.2766822 1.351119 0.7659887 0.2350161 0.3783044 0.1697431  
0.2842829 0.78288019 1.927444 0.02845255 0.1174198 0.1227747  
0.482335771 0.1872796 0.4258393 0.5187183 0.486569473 0.4676343  
0.2155106 0.06950136 0.1628921 0.9063851 0.1785181 0.6479139  
1.629223518 1.879543857 1.659941649 0.1892094 0.428724269 0.153691635  
0.6053402 0.06989595 1.098339502 0.5700437 0.06045317 0.2818817  
0.699761645 0.1143541 0.2331148 0 0.093670963 0.3432904 0.5140306  
0.04277146 0.368884 0.05927337 1.212921 0.2075236 0.09876054 1.496603  
1.249916 0.6331804 0.177204519 0.01983798 0.4773921 0.1909833  
0.6469438 0.242006 0.1452429 0.2819779 0.221143435 0.022757032  
0.158099154 0.04835181 0.8716545 0.1052527 0.7312774 1.003138  
0.991500011 0.4066823 2.399553 0.1714429 0.1699341 0.1594196  
0.088925848 0.4997172 2.525431 0.3627696 0.4170598 0.2979517  
2.686558 0.7702766 0.771244704 0.2062076 0.7080696 0.152654922  
0.1010535 1.537426 1.133743 1.63457 0.7198272 1.262864304 0.704770002  
0.365190117 0.0258764 1.039216 0.0773665 0.1199436 0.4214745  
0.1455628 0.540437814 0.3985166 0.237771513 0.1131444 0.6095663

0.06244885 0.9311634 0.1915851 1.03740928 0.4444994 0.1037737  
0.2839953 0.5563573 0.1801904 1.177507 0.4753154 0.802652783  
1.182936 0.169400992 0.06720494 0.06744888 1.00715681 0.955125 0.7204748  
0.249365 0.920976235 0.0969938 0.8475259 0.5089772 0.489752961  
0.1324137 0.1690025 0.2034263 0.1673795 0.5666755 1.130683  
0.7673999  
AL021707.8 2.591557 2.118424461 0.4462439 1.028255316 1.106106453 0.594085994  
0.6579048 0.976042234 0 0.2065608 0.866261319 3.530953 0.6969322  
4.072325 1.118241 3.080049 0.09632502 0.779810122 0.344125 1.733149 1.000928665  
1.649951 2.690755534 4.393559 0.8331979 1.601892535 1.106833 0 0.4638538  
1.806211 0.4650692 0.771007802 1.936281 3.240856421 0.2626885 4.214703326  
2.184262895 4.668475913 2.949373 2.607009 1.684751047 3.091146 0.268729551  
1.459274 1.317903786 1.190813 3.174619 3.456363 0.080490823 0.1155318  
2.554173 4.969612 3.305225561 1.585757 0.409456901 3.698441 0.7875087  
2.914461 0 0.3909335 0.9412564 3.408522 2.210913243 0.785133 0  
0.9766499 0.5617899 1.735926 2.158051 0.3207634 2.223462 4.685422371  
0.1742712 0 0.800734359 1.010631 0.205223796 1.6966 0.3217835  
5.997091 0.6131699 0.2747877 2.027214 0 2.072188697 0.111787 0.3023752  
0.4070975 0.958907368 0.5802964 0.4490406 0.2955328 1.484141543  
3.073506 1.303461 0.873001599 0.7874238 3.335321149 0.268393757 0.1104199  
0.095040448 0 2.466845 0 1.942551 0.5896261 0.339007009 0.92039  
2.582654758 1.249523117 0.08217829 4.309714092 0.8676971 4.334313  
3.694316 0.6576831 1.382937 1.091323311 1.060803 2.144406 0.3785982  
0.1623387 0.8379334 1.163745 4.904788 2.504588 1.697902 2.895273 4.641715  
2.912381577 1.692879009 0.9274405 4.428917629 2.181887898 0.1578081  
2.0228794 1.109398 0.1941529 0 4.095435584 0.472734706 2.310173928  
0.9727159 2.575533 1.096372 0.9978897 4.814044 2.182666 1.384915508  
0.9032571 2.863667 2.035843707 3.829155 1.055467 0.730512952 1.931333  
0.5969546 1.814606789 0.5717406 1.344423 0.928532754 1.514983 2.621855  
0.2274209 2.257019259 2.344892 3.278384 0.251963049 0.5092061 0.884826108  
0.6913793 0.1124316 1.636263121 0.9688213 2.944945507 1.705349  
7.212215 0.4214901 0.9726596 0.3534203 2.583229657 0.6281139  
0.223665 3.846684 1.42104 1.16771 0 0.8263963 1.295427 3.077101586  
0.108114343 5.516576 0.8737812 2.543705 0.5633262 2.774008549 2.547854  
3.148793095 0.7972118 3.477047 0.231341249 0.978201974 0.2965143  
0.6897432 1.826195639 1.06219 0.2551596 1.652335 1.850889 1.21704  
2.372988 1.781247 0.3967642 0.132108 2.925638 4.376895 0.3436845 0.2671987  
1.582260911 4.021149 2.59938 0.527548993 1.274923 1.198586 2.232506 2.317588  
0.602096 3.157998873 2.339639 0.6041248 0.5601806 0.118589 2.075386  
0.372024711 0.4582156 1.993967 0.4019766 2.89069094 0.272339729  
3.285364 0.299689 3.114789 1.672649016 1.410305 2.073593 1.12212712 0.9946374  
0.8313595 0.1776526 0.6185957 0.3537802 1.134959 2.582659551  
1.229618 0.49912428 0.8084803 3.182559 3.314042 0.1201234 4.035576  
1.145543 1.25089 2.854968391 2.267399 3.649692 0.165110049 2.344552 0.3403104

1.515753 0.5511033 4.116332 2.850894 1.431211 4.581003 1.570232401 0.6039895  
0.485729482 1.131432 1.186498 0.4904616 1.266615871 1.821080922 2.273348  
3.085388 1.872488 0 0.5940397 0.238710827 0.1975538 4.508155 0.2591815  
2.781885165 0.07993905 0.1926305 0.588932437 0.267473 0.240761476  
0.8274901 1.407966 1.883052458 0.7344451 1.54303 1.26429047 1.184313833  
0.1664639 0.3902475 3.224836 1.850495 1.890572 4.012855 1.773724 0.8019391  
1.025427 1.993744303 0 0.596807674 0.933678 0.362270433 0.9425173  
0.371948 1.036384473 0.8159053 0.4618523 0.3399178 1.000018074  
0.4053685 0.2727846 0.326577397 1.749755076 1.207904 0.5857663  
0.6620336 1.585559641 1.019133681 4.263563153 0.4312505 0.215159 0  
0.7410396 0.6078193 0.7393162 0 0.3481604 1.208206 0.4277108  
0.3886391 0.566468192 1.845841 0.5324238 2.12817 0.9684281 18.3634  
3.453655 0.8813554 0.4927268 1.905327 0.7900312 1.876952729 3.449799 0  
2.415444 0.7608917 5.021144458 0.9338296 7.449333 1.924265 0.5756764  
3.106706 0.3588353 0.633339 0.82270813 0.1376712 0.4332406 0.147569602  
0.5662505 1.088885 1.916205 0.820816 1.671142 0.75360835 1.193144388  
0.8826582 1.392774 4.783668 0.241356678 2.08748177 1.505067519 0.6216358  
0.4399244 1.192064 0.687823 1.241244 0.1849806 0.1884361 3.566755512  
3.874104769 0.9614161 1.123336967 9.391862 0.947966807 4.883268 0.8349364  
0.7757335 4.377396 1.954318 1.346068 2.206156 0.3712087 0 1.732450913  
2.185606 0.1037041 0.6847563 1.566216 2.134740557 0.9101312 0.7163551  
1.219761 1.156599566 0.8522188 0.2356484 0.1266596 0.2968552  
2.981298 0.4140592 2.237232 0.755771943 1.844386353 3.025084917 0.3448161  
0.878972604 0.280088308 1.974102 0.5095148 3.493734476 0.4920869  
0.4406805 0.07903114 3.294392426 0.2500793 0.2427597 0.2710738  
0.910433983 0.4549919 0.8029472 0.07794689 2.068479 0 2.14345  
0.5294686 0.4319559 2.583868 0.5157403 1.968436 0.553608497 1.879947  
1.367145 0.6960975 1.67024 0.6615491 0.1512521 0.4404667 0.134337587  
0.08294503 1.056442159 0.08811655 1.099736 0.7672519 0.627145 1.828124  
2.444648292 0.4940931 2.94806 0.3124382 0.464533 0.1660154 0.259294168  
0.7919016 4.790208 1.256114 0.8941783 7.518302 6.37618 2.92449 2.136389973  
0.1670194 2.228854 0.741863994 0.1841604 1.146196 1.859524 2.00899  
2.031199 1.24661844 2.877002089 0.532419253 0.09431452 4.958499 0.4934757  
0.7286193 1.331368 0.3031705 1.871302848 0.8715101 0 0 0.6347865  
2.048527 1.939379 0.2094873 1.556947582 0.9720693 0.8510292 1.505612  
1.43637 1.125874 2.65081 1.732434 1.575277782 4.570272 1.166264634 0.08164972  
0 1.988400888 7.064886 0.9089976 1.038729 1.356997074 0.07070477  
2.368287 2.597175 1.033453401 0.6434967 0.7186453 0.3707249 0.6972184  
2.168695 2.060561 0.7171861  
AC095057.3 0.0819801 0.854418993 0.2540929 0.704759261 1.030262796  
0.293641251 0.5500276 0.336825449 0.2207593 0.1470206 0.369939255  
0.5336612 0.2817044 1.127193 0.8707428 0.4871641 0.3047101  
0.452249431 0.3810062 0.6244029 0.417374749 0.6592901 1.021417313  
2.022711 0.5836192 0.4645073 0.3151175 0.1099016 1.36462 1.507778

0.2353885 0.243897023 1.1116 1.290334722 0.3877891 0.624304123  
1.222466927 0.857499075 0.5371766 1.123283 0.520257114 0.6947802  
0.141681094 0.3000529 0.347416296 0.6164123 1.318071 0.8200273  
0.356469299 0.2010074 0.7723292 1.310053 0.686148543 0.8569532  
0.242860673 0.9505823 0.553593 1.606423 0.1701891 0.8038295 0.1276083  
0.9072961 1.879610665 0.3015865 0.1954567 0.5149148 0.2332496  
0.2288062 0.7782414 0.08455734 0.5055397 0.461973421 0.3307688  
0.7774093 0.430610992 0.2752958 0.064919541 1.22098 0.2544788  
2.012768 0.6303938 0.1738501 0.4675995 0.548096284 2.437664934  
0.1591298 0.2391299 0.5923849 1.061677043 0.2491284 0.4616541  
0.2103468 0.440143532 0.5063847 0.5798402 0.800867672 0.4270114  
1.947839969 0.254707299 0.3842269 0.105226287 0.1046495 0.2205338  
0.199190568 0.8015186 0.4041257 0.321719703 0.526313 0.959069344  
0.679367446 0.1039836 1.321580786 0.2439851 2.713628 5.978058 0.2080484  
0.3827878 0.594552688 1.887579 0.8978182 0.6706785 0.5520496  
0.1566311 0.6442337 0.8792162 0.06254919 0.7589547 0.5061427  
2.447231 1.911675184 0.988647644 0.5067511 2.354497336 0.474518187  
0.5366431 0.88457907 1.100682 0.1381892 0.062418149 1.452565116  
0.138861078 0.514259403 0.3077044 0.6180726 0.5945505 0.8680864  
1.463133 1.515998 0.760906587 0.3896347 0.5627431 0.664134623 1.035464  
0.4799547 0.44933597 0.8675476 0.3506988 0.462408443 0.9043088  
0.8312455 0.391636978 0.718864 1.388319 0.8153344 0.727705265 0.4564752  
0.7930525 0.119557229 0.2416198 0.279901777 1.609064 0.4801423  
0.608950432 0.3958602 1.500895593 1.784374 1.305382 0.1466654 0.4102488  
0.167699 0.923095895 0.3264269 0.1297141 0.6692632 0.6368273  
0.513039 0.2374558 1.176383 1.28791 0.472792346 0.205202332 2.956955  
0.4606798 1.749269 0.19602 0.299639939 1.229114 0.674425487 0.3362483  
1.374891 0.164658184 0.72718368 0.3282929 0.1714351 0.641878041  
1.024825 0.08071599 0.7114418 0.8895122 0.9303989 0.5560444  
0.6247183 0.5438791 0.02089522 1.140327 0.9108991 0.2310291  
0.211311 0.869332997 1.008025 0.3245826 0.200258874 0.9506434 0.1895776  
0.5548876 0.855324 0.4285445 1.410334135 1.387707 0.4897092 0.4252918  
0.01875695 0.5539371 0.220658563 0.85158 2.123566 0.07629565 0.726163198  
0.129226025 0.4788825 0.2962569 0.8838882 0.715865546 0.6213946  
1.029164 0.464189545 0.5506182 0.6739078 0.3371867 0.8805766  
0.4616419 0.4846872 0.707007559 0.3291298 0.217099649 0.4384301  
1.402267 1.436626 0.161497 1.252955 0.1385554 0.6834831 0.500381411  
0.8887768 2.239782 0.39172609 0.754452 0.1184174 0.4944702 0.3748169  
1.676507 0.1082206 0.4042345 0.5175475 0.514460017 0.2229071  
0.486569118 0.44739 0.4253755 0.6206013 0.701181906 1.29616261  
1.258496 0.7229758 0.8588844 0.6836295 0.362409 0.188781682 0.2708041  
2.478678 0.3689472 0.963818962 0.3034506 0.2894453 0.477394131  
0.2256298 0.304645463 0.1427806 0.6402473 0.810781302 1.264913  
0.5103021 0.19996988 1.105188977 0.2369629 0.271588 0.4675593



|              |             |             |             |             |             |
|--------------|-------------|-------------|-------------|-------------|-------------|
| 0.8231865    | 0.9344605   | 1.093852    | 0.7835933   | 0.9259381   | 0.2162526   |
| 0.51056003   | 0.1106699   | 0.229246657 | 0.4594417   | 0.773542874 | 0.8050092   |
| 0.3088583    | 0.907878587 | 0.4875216   | 0.4967407   | 0.5197187   | 0.263617556 |
| 0.1282324    | 0.2157285   | 0.129134969 | 0.46125782  | 0.04093959  | 0.3358537   |
| 0.9162328    | 1.630097834 | 0.610234447 | 1.579417119 | 0.2046296   | 0.3573275   |
| 0.6693552    | 0.08790639  | 0.2563663   | 0.4358521   | 0.2398532   | 0.3992409   |
| 0.716622     | 0.2593251   | 0.5040552   | 0.403186306 | 0.5605485   | 0.7298394   |
| 0.4257097    | 0.2506484   | 2.09565     | 0.3361579   | 0.7144349   | 0.5065675   |
| 0.1567078    | 0.7653641   | 0.786714111 | 0.8083654   | 0.2334975   | 0.8503585   |
| 0.2129242    | 2.674288835 | 1.287114    | 3.632918    | 0.901797    | 0.0910534   |
| 0.3121588    | 0.3405908   | 0.303626942 | 0.1306508   | 0.1941532   | 0.280088889 |
| 0.3940751    | 1.033359    | 0.7018736   | 0.4284276   | 0.5066146   | 0.390097573 |
| 0.714428165  | 0.4048632   | 1.138175    | 0.4486942   | 0.267223772 | 1.139093877 |
| 1.904424242  | 0.5899361   | 0.2504945   | 0.870212    | 1.476454    | 1.017319    |
| 0.5364811    | 1.049937322 | 2.745156486 | 0.4942111   | 0.533026789 | 2.265371    |
| 0.52478197   | 0.9114027   | 0.9810168   | 0.4048967   | 1.319816    | 0.7065368   |
| 0.348389     | 0.7269635   | 0.4501346   | 0.4006115   | 0.660866297 | 1.481538    |
| 0.2030743    | 0.6370064   | 0.575985975 | 0.4408571   | 0.2266084   | 0.4147924   |
| 0.536614215  | 0.5759357   | 0.2360558   | 0.4207025   | 0.3130193   | 0.586245    |
| 0.3742331    | 0.5111278   | 2.288312085 | 1.750333808 | 1.355666836 | 0.177251    |
| 0.278050106  | 0.103368805 | 1.010185    | 1.974425    | 0.828893789 | 0.3891612   |
| 0.7750107    | 0.705960916 | 0.4087295   | 0.2687772   | 0.2858341   | 0.324002759 |
| 0.1259388    | 0.9172243   | 0.06164339  | 0.8669914   | 0.6321553   | 0.6144819   |
| 0.2871251    | 0.2391251   | 1.846648    | 0.4894406   | 0.579742    | 0.335658047 |
| 0.4128183    | 0.7156508   | 0.6215953   | 0.1395142   | 0.358848    | 0.3251154   |
| 0.159358979  | 0.157430671 | 0.653189546 | 0.2648066   | 0.7924052   | 0.2305735   |
| 1.51271      | 0.7538555   | 0.739705687 | 0.7189759   | 1.01029     | 0.1581364   |
| 0.2100662    | 0.112782878 | 0.4509116   | 1.500456    | 0.3868967   | 1.103155    |
| 1.824915     | 1.147148    | 0.409046327 | 0.4358815   | 0.6494022   | 0.293347258 |
| 0.5841604    | 0.6100196   | 0.5588146   | 0.3614288   | 0.8645354   | 0.845090501 |
| 0.484216213  | 0.1342576   | 0.468386    | 0.4460109   | 0.1267684   | 0.6155397   |
| 0.2397589    | 0.451758368 | 0.3369538   | 1.11616683  | 0.09784011  | 0.769754    |
| 0.360012     | 0.2410155   | 0.2429836   | 0.580467123 | 1.409374    | 0.3140791   |
| 0.4142826    | 0.3709934   | 0.8385449   | 0.3454972   | 0.71188007  | 0.8047035   |
| 0.151912654  | 0.1420578   | 0.3110694   | 0.653193856 | 1.101242    | 0.3354727   |
| 0.3080499    | 0.463155577 | 0.1341985   | 1.026041    | 0.9536175   | 0.505236667 |
| 0.6488499    | 0.3085232   | 0.2345468   | 0.05513871  | 0.4246883   | 0.5344992   |
| 0.2041842    |             |             |             |             |             |
| TRAF3IP2-AS1 | 0.2919602   | 1.472170923 | 0.6371686   | 0.624762723 | 0.58338948  |
| 0.848828565  | 0.6959752   | 1.206293854 | 1.205804    | 0.7647978   | 0.296063995 |
| 0.5870023    | 1.302705    | 0.7380796   | 0.8590968   | 0.8217462   | 0.6181871   |
| 0.365227526  | 1.006239    | 0.5411519   | 0.425020342 | 0.9662274   | 0.367850124 |
| 1.269206     | 0.3796851   | 0.476512336 | 1.297377    | 0.7229877   | 1.173139    |
| 0.7700133    | 0.72220984  | 0.7244032   | 0.53047628  | 0.8445935   | 1.028905875 |

0.663573538 0.832090541 0.9129819 1.08559 0.688523936 0.8433207  
0.564672221 0.9171257 0.83411632 1.447065 0.6881691 0.3645952  
0.935323746 0.754613 1.258068 1.028521 0.815846816 0.7376783 0.711366578  
1.202578 0.6113991 1.264386 0.7712498 0.8758889 0.3114827 1.095484  
0.682164687 0.8774181 0.4860342 0.9395619 0.4880105 0.8981771  
1.448899 0.6009239 1.314024 1.582860919 0.3308946 0.3732984 0.513889013  
0.7931536 0.1194974 1.001853 1.148645 0.3777112 1.03618 0.8765378  
0.9494545 1.056400582 0.939370351 0.224989 0.3760553 0.87191 0.407177007  
1.076644 0.3040971 0.5106358 1.120151133 0.8534815 0.9280973  
0.202226953 0.995315 0.526116871 0.563966628 0.7128373 0.656861832  
0.9128908 0.8308802 0.478239234 0.6125932 0.8135347 0.472035076  
1.131891 1.112943685 0.67023471 0.9330877 1.082160191 0.9189535  
0.9841359 0.8849093 0.6160576 0.561271 1.229465503 1.440141 0.8287021  
0.8425009 0.8877253 0.7694717 0.7126094 0.586712 0.5456364  
0.2915495 0.90851 0.9233068 0.962191888 0.776383654 0.6115344  
0.710121814 0.92177859 0.7161292 1.314946922 0.6051265 0.4902974  
0.629414305 0.593814596 0.471879852 0.776556356 0.8274242 0.6036932  
0.7375231 0.4784186 0.9678273 0.8180492 0.824859736 0.6236528  
0.678844 0.700626592 0.4925209 1.277583 0.459267637 0.9769125 0.9974431  
0.490020399 1.470966 1.526979 0.35554577 0.939673 0.935037 0.9068049  
0.919729854 1.092532 0.2929308 0.641070542 0.7565578 0.579617102  
0.5663559 0.5251553 0.745638891 0.5457285 1.337858507 0.7771208  
1.787289 0.3937464 0.7325727 0.3892097 0.755712755 0.487271 0.3680563  
1.683533 1.016313 0.4187991 0.4190313 1.482806 1.061173 1.068360768  
0.443405661 0.6866624 0.7742365 0.7055735 0.701662 1.009742537  
0.4450681 0.944139702 0.8678508 0.3356011 0.522714088 1.222133352  
0.3941013 0.729656 0.720461149 0.1653789 0.9108228 0.6030674  
0.9029167 0.6264929 0.8677593 0.7293603 0.8136178 0.2458213  
0.8768977 1.732096 0.3556482 0.8726236 1.356675411 1.227377 0.9143723  
0.352589707 0.5256465 0.739634 1.166717 1.022588 0.4315656 0.874739822  
0.9958273 0.5534624 0.9530161 0.3422569 0.753641 0.437953141  
0.5437685 0.58557 0.7937766 1.04930144 0.827361203 1.281855 0.9445893  
0.6540362 0.833210865 0.6847505 0.6951198 0.704743907 1.639263  
0.9984206 0.853407 1.039476 0.7019627 0.6594254 0.513011245 0.7830283  
0.40277434 0.6820182 1.217199 1.025442 0.7389872 0.7946282 0.3659254  
0.5095686 0.49226961 1.17176 1.35824 0.60192018 1.034632 0.5479428  
0.5863949 0.6655095 0.2540142 1.442047 1.327688 0.9847499 0.78795568  
0.7760118 0.633292869 1.310456 0.7149027 1.184558 0.876095064 0.61807256  
3.863253 0.9156356 0.8106213 0.5310202 0.9571237 0.457780889  
0.9102481 5.706525 0.29527 0.794824333 1.059445 0.4718229 0.531157419  
0.6365181 0.795427154 0.1999688 1.443611 0.877963277 0.3563763  
0.8842683 3.50480523 0.899478861 0.4045706 0.5690698 1.194006  
0.7949517 0.6192221 0.8721719 0.796666 0.7308812 0.5884309  
0.94459495 0.5579885 0.534213017 0.2403138 0.402395323 1.317138

0.8156961 0.429892683 0.4544283 0.6524395 0.3743398 0.434607011  
0.6119013 0.5455692 0.561175717 1.190497916 0.2686659 0.4921549  
1.062187 0.677375163 1.116808338 1.001269828 0.6277696 0.7680358  
0.3749815 0.5065334 0.5847375 0.7120917 0.4645324 0.2941735  
1.055269 0.3979334 0.6169031 0.8335687 0.689737 0.5560122 1.167086  
0.8224395 5.896533 1.513286 0.7300468 0.8794238 1.024535 0.4500178  
0.741277534 0.9267392 0.5402216 1.053366 0.8157174 0.758814133  
0.2735631 0.7032862 0.9932562 0.7058022 1.212533 0.810786 0.8874763  
0.774109337 0.2195769 1.022777 0.336234535 0.8730292 1.529953 1.026402  
0.8509472 1.208405 0.577564052 0.56312963 0.7072438 1.304624 0.4414718  
0.678242816 1.109800434 0.514390165 0.3979368 0.5813684 0.9889369  
0.6716536 1.144116 0.653286 0.5939316 0.974461685 0.506085585 0.533951  
1.164573387 7.052812 0.371986975 0.8604442 0.865133 0.9515009 0.919461  
0.9584284 0.7737179 0.7365488 0.5732589 0.8219304 0.874610364  
1.843735 1.256264 0.3933015 0.5777722 1.530718657 1.006617 0.548601 1.05378  
0.52120183 0.5413404 0.4205877 0.6204716 1.070933 0.9975057  
0.5054068 0.5569479 0.83230581 1.194015035 0.928586193 0.5728749  
0.730622797 0.769356491 0.7408394 0.9722702 0.704827762 0.4214922  
0.5271431 0.6002365 0.742549865 1.215576 1.451949 0.8406719 0.384629547  
0.5615407 0.4404351 0.6245618 0.3416919 0.8286095 0.8292302  
0.5055324 0.4948356 0.7849727 0.4635134 1.172813 0.651716331  
0.3899014 0.453093 0.9284971 0.7648531 0.3907885 0.7237128 0.44883  
0.336694206 0.57011584 0.700242444 0.5588151 1.113656 1.040161 0.8395011  
1.046295 0.577189938 1.268381 0.7164904 0.7783271 0.7879421 0.3940239  
0.588335185 0.9502819 0.6741245 0.547301 0.6315842 0.5488043  
1.305791 0.7107622 0.789937665 0.463003 1.202779 0.85572603 0.7273169  
0.6915867 1.182145 0.7944762 0.7359884 0.731948315 1.147159061  
0.252730658 1.482767 1.229164 0.7522604 0.4952767 0.4550245 0.4892942  
1.036011104 0.6471974 0.409025083 0.7712733 0.7673684 0.3630301  
1.259895 0.517089 0.730611026 1.095116 0.7145773 1.207825 0.9657794  
0.2066477 0.7861353 1.049758 0.94573639 0.7531616 0.679959202  
0.8464699 0.4481103 0.891585792 1.59028 0.9741999 0.8825906  
1.149966874 1.133066 1.337294 0.7115225 0.495914923 0.4215311 0.7134471  
0.2421444 0.4567222 0.8510069 0.6166033 0.3513304  
AC008906.1 0.5211592 0.774568784 0.5710674 0.647496105 0.741455974  
0.570197921 1.219945 0.437982443 0.382745 0.6042057 1.58367454 1.936557  
0.2972928 1.269019 0.3302391 1.357181 0.4226368 1.298904506 0.4246558  
0.616096 0.582231232 0.7620366 0.623094039 0.8175613 1.436187 0.707729245  
0.7149635 1.803813 0.7462438 0.642068 0.5611494 0.626459886 1.061956  
1.041955044 0.4162078 0.941746897 0.906151021 0.619459559 1.33982  
1.528426 1.290672701 1.75483 0.32752253 0.6002556 0.578245098 0.3760293  
1.257479 0.421255 0.618034435 0.3801817 1.1811 1.756492 1.057441045  
0.5314901 0.486562421 0.8451731 1.071778 0.4197925 0.5286636  
0.5002855 0.5408161 0.6383348 1.23784085 0.4716176 0.1775066

1.130806 1.142591 0.7669465 1.467647 0.7036928 0.5589197 1.301550117  
0.7327746 1.491234 0.556274399 1.262532 0.250122908 1.457788 0.1176551  
0.5882968 0.7006125 0.502359 1.266249 0.703904318 1.231203025 0.9400828  
0.456055 0.7888987 1.880541796 0.3637308 1.299795 0.6078204 0.763105994  
0.7725984 0.9829672 1.643876837 2.262144 0.750466481 0.621515213  
0.7670929 0.538625837 0.4435146 1.333337 0.098671394 2.655768 1.131835  
0.599104295 0.5047893 1.724387306 0.428314305 0.4657317 1.752652796  
0.5640176 1.518741 3.766567 0.4208252 0.8690845 1.352252428 0.5817992  
0.4842777 0.2768571 0.3561395 0.2785248 1.954664 0.4632845  
2.674993 1.57902 1.030753 2.424529 1.251218479 1.66647046 0.5394838  
1.799293875 2.160635743 0.5048756 1.044189496 0.6453272 0.2129669  
0.90182066 1.474743628 1.481554753 1.8927066 0.3556584 1.656099  
0.2433861 1.68749 0.7592934 1.422625 1.066047796 1.366083 0.7932235  
1.581795647 1.964615 0.4823938 0.920013315 0.9745034 0.4677152  
0.755632963 0.9668471 0.6703188 2.206772649 1.677176 1.792241 0.2078822  
1.253735781 0.7749333 0.9342728 0.598821272 0.3840029 1.2334308  
0.5236407 0.4933064 0.598274028 0.3837539 1.455637956 0.3357491  
2.637034 0.1387001 0.5927296 0.8076413 1.469249502 0.4265115  
0.7496464 1.248251 2.662853 0.8301904 0.439139 0.8875917 1.217964  
0.884002496 0.454598672 1.120583 1.455429 1.738819 0.43254 1.224548936  
1.024741 0.575653483 0.9068516 2.304282 0.327771954 0.679562091 0.3975247  
0.810623 1.205605346 1.1457 0.5597706 0.3356391 2.121347 2.68231  
0.9479835 1.21762 0.2659628 3.28462 1.566366 0.9896859 0.5968987  
0.602465 1.948729143 1.331566 0.4502003 0.655826141 0.7491789 0.5697177  
0.6996694 0.8272137 0.3439797 0.764121782 0.6059454 1.076833  
0.3686783 0.5203226 0.7114055 0.272050038 0.8795817 1.360917  
0.5879058 1.181281354 0.24894191 0.6712823 0.2465473 1.339852  
1.421019382 2.559864 0.5490246 0.694333941 0.7455309 1.519868 0.552125  
1.088491 0.582094 0.248988 2.288133556 0.8645972 1.300291051 0.3589528  
2.971471 1.907349 0.4062716 0.5738232 0.3818924 0.353421 1.029768144  
1.838304 0.480403 0.422589357 1.418894 0.3484017 1.489443 0.6347322  
0.9782972 0.9589939 0.6728143 1.869388 1.107252504 0.2760492  
0.710397564 0.7756698 0.9110314 1.004246 0.876616764 0.43696391  
8.987504 1.316145 1.352176 0 0.3102876 1.352853666 0.2768912 13.53991  
0.9002737 0.435922636 0.189985 0.598675 1.022836205 0.3259911 0.83629136  
0.4950962 1.447877 0.688508691 0.4028076 0.897567 0 0.627887464  
0.5782169 0.6706332 0.4749196 1.818375 1.411319 1.389193 1.44243  
1.495404 0.2082953 0.989331945 0.4202992 0.85726691 0.8724278  
0.52983408 0.6892335 0.1869958 0.466384959 0.9446896 0.540381  
0.3935711 0.365640974 0.7966646 0.8810315 0.223889849 0.826370342  
0.8833027 1.003951 0.9480771 1.576154786 1.22435669 2.215286349 1.07748  
0.3343454 1.83102 1.151536 0.5185591 0.6389368 0.6653589 0.7956212  
1.932708 0.9383145 0.6820792 0.854370982 0.458934 0.6326854 0.9383357  
0.6438011 18.74052 2.768391 1.440072 0.3753289 0.710586 1.823445 1.578440367

0.957703 0.5888439 1.054105 0.5885172 1.479962597 0.5365489 2.648073  
3.62212 0.2706263 1.561888 0.3116059 0.1736779 1.286799895 0.9186564  
0.4092198 0.553054306 0.331265 0.836081 1.419699 0.3301304 1.107486  
0.400792889 0.997153352 1.775016 2.355263 0.9762269 0.72804844 1.030394348  
1.49040777 1.347513 0.3377881 0.9220104 0.2155643 1.134604 0.2874499  
0.5511898 1.267902601 0.849903504 0.3954676 1.108972618 11.76141  
0.57768207 2.071169 1.591825 0.4679974 2.975979 0.877895 0.4250547  
1.983005 0.4750432 0.399902 1.192364406 0.9132946 2.38882 0.7824076  
1.083968 1.010103483 0.3951706 0.327405 0.8027755 0.225542693 0.2974368  
0.5313272 0.463111 0.235171 1.620367 0.8218547 0.2045022 1.06586818  
0.834935566 1.728242195 0.6619023 0.303528002 0.426707962 0.7642583  
2.049257 0.731860587 1.67929 0.6042297 0.7657573 1.262827428 0.3962296  
1.065135 0.4294936 0.603355788 0.5822624 1.663649 0.897752 0.8130302  
0.3159667 1.102105 0.3456999 2.369069 0.8397787 1.194292 1.402228  
0.624123065 0.4097802 0.454432 0.2545172 0.3233103 0.9809784  
0.3456436 0.4563076 0.073677658 0.530732186 0.684754127 0.4510581  
1.407354 0.308587 0.4012851 1.372658 1.865420718 0.3432491 0.9880859  
0.7197003 0.9907872 0.7891123 0.17776286 0.4777516 1.493896  
1.353663 0.8337029 1.328659 1.054659 0.8554354 1.829506467 0.8549522  
1.243864 0.491642384 0.3254543 0.6751984 1.221312 1.823725 0.9592902  
0.788895939 1.953585834 0.462343092 0.275877 0.5917423 0.6572868  
0.999031 0.9923107 0.6928098 1.440447641 0.5310901 0.565839872  
0.8481594 1.160499 2.143006 0.924367 0.1148936 0.894572708 0.5035144  
0.5358962 1.101007 0.8186724 0.5831823 1.130765 0.6196669 1.04224173  
0.9774056 0.865394813 0.4478092 0.04494346 1.398130187 2.882662  
0.683186 0.7595898 1.893260284 0.4136335 1.110646 1.407467 0.532447656  
1.397002 0.6005975 0.4202043 0.5417199 1.51038 1.672574 0.4457874  
AL022328.3 0.2095383 0.91351205 0.3848608 0.892971848 0.662469255  
0.620443639 0.7345888 1.028313876 0.04702108 0.1948486 0.326857364  
1.22656 0.5426286 1.446769 0.9736946 1.128107 0.4932579 0.303578511  
0.4405459 0.3114052 0.245240254 1.053201 0.435117758 1.332141 0.7699149  
0.467710155 0.4971785 0.2621776 0.2500302 1.10882 0.3509594  
0.438683379 0.8697579 1.415601344 0.6135847 0.991677513 0.883034116  
1.217631848 0.939424 1.211423 1.081104711 1.337356 0.193136997 0.5309478  
0.757746153 0.6127054 1.354707 0.6210254 0.780962511 0.3113745  
1.174304 4.799444 1.558907932 0.6054604 0.469006045 1.121379 0.1179137  
1.166331 0.1812488 0.6672929 0.144961 1.254734 0.782082069 0.2418335  
0.1189477 0.7604157 0.1514102 0.6238086 1.16325 0.2017172  
0.3745338 1.672782625 0.3052954 0.1409242 0.949560097 0.4085689  
0.055310684 1.486087 0.4986697 0.8672829 0.2478868 0.333266 0.6374229  
0.155657192 0.94244149 0.9038447 0.2852303 0.7680292 0.634350155  
0.5138792 0.2420454 0.1194753 1.124991311 0.6557794 0.5708641  
0.399986447 0.3031739 1.106357803 0.19289566 0.3273568 0.589138802  
0.2377604 0.7804753 0.678832067 1.274718 0.3178249 0.335012818

0.4770346 1.846076395 0.589336934 0.2657784 2.654921705 0.2078725  
1.314178 1.22544 0.2067973 0.8386218 1.176507605 0.7147533 1.376875  
0.3469276 0.3062678 0.2874261 1.019348 1.035495 0.4973842 1.850329  
0.7187126 1.489294 1.844579819 1.017798674 0.4999164 1.757325809  
0.857571919 0.5316437 1.443161384 0.4620885 0.4709422 0.372256693  
0.936538222 0.382225853 1.568090567 0.2359445 0.6702062 0.6120813  
1.243872 0.7123268 1.585742 1.257276989 0.5975356 1.309718 1.508892998  
1.531371 0.8533894 0.568774444 1.853056 0.436695 0.923783623 0.5007993  
1.152902 0.604777041 0.5444121 0.9524099 0.3677587 1.614330021  
0.704902 1.637204 0.724347381 0.1887025 0.625991667 1.118018 0.4848304  
0.596641382 0.4351848 1.234650694 1.272781 2.204301 0.4543899 0.4150635  
0.1905034 0.722002332 0.3869383 0.3014042 1.581021 1.563876 0.4196191  
0.404619 0.7238574 1.097284 1.303220175 0.291383281 2.147592 0.3663275  
1.788428 0.2429189 0.784104072 0.7210163 1.078484822 0.8116923  
1.093298 0.452035349 0.632733884 0.9589771 0.2124519 1.121088683  
0.5439224 0.2750763 1.410203 0.7482608 0.6195729 1.563353 0.960142  
0.3208005 0.08901242 1.323554 2.452398 0.2778834 0.3360643 0.920215767  
1.001963 1.106162 0.654036439 0.4663274 0.3391876 1.403947 0.9518054  
0.6085248 1.051389558 1.576413 0.4681077 1.056836 0.0319614 1.118691  
0.401063459 0.4013604 0.3940948 0.3683503 1.237364978 0.220198102  
1.024346 0.2221185 1.3086 1.007675757 1.628987 1.021369 0.488539087  
0.7773992 0.9522678 0.2393993 0.4376405 0.4052321 0.7341294  
1.311810819 0.4333682 0.201781465 0.2490249 1.715488 1.124746 0.4046868  
1.16821 0.5448349 0.5516712 0.831842082 0.9830671 0.983643 0.244747076  
0.6318895 0.1284058 0.5617103 0.4307371 1.303556 0 0.2479702  
1.543305 1.088227547 0.3255672 0.567280529 1.105396 0.7035113 0.634494  
1.365482795 1.196341545 1.072224 0.9239503 1.413053 2.809437 0.6404081  
0.289511584 0.3549568 1.677872 0.3492652 1.106784104 0.4955279  
0.05191663 0.535698669 0.2643216 0.227110052 0.3243929 1.35185  
1.127797741 0.9897162 0.8695428 0.34074397 1.053324188 0.08972872  
0.4417441 0.8208528 0.903956 0.7218421 2.508207 0.8901497 0.8213085  
0.5527341 1.202622537 0.2424586 0.183826306 0.9226774 0.244092376  
0.6858584 0.6265324 0.730529534 0.9040247 0.3983221 0.2443003  
0.628877346 0.1365656 0.3675963 0.506098772 0.982465571 0.5115741  
0.3749465 0.2379031 1.068326268 1.118302486 1.270046756 0.2711987  
0.6378719 0 0.3328676 0.5460527 0.4166263 0.463198 0.2580438  
0.5291463 0.2113357 0.3770773 0.763355517 0.6964719 0.5261508  
0.7760086 0.5457376 2.505921 1.002409 0.3117681 0.221328 0.6162146  
0.665389 1.441715311 1.790666 0.1085112 1.133993 0.1577469 2.734155094  
0.5752689 2.42597 0.9027765 0.3767998 1.465276 0.09671112 0.4779424  
0.443462703 0.2597303 0.4865184 0.556809012 0.5494047 1.408655  
1.467789 0.5088092 0.6568278 0.406215988 0.551261325 1.141866 1.126116  
1.049402 0.357769508 1.181471641 0.946485759 0.8376977 0.6639683  
0.5189873 1.297645 1.338131 0.1994195 0.304717 2.029391084 2.21354593

0.2267257 1.271571123 3.29061 0.510980635 0.8949542 0.8358148  
0.5017705 1.917126 0.6772062 0.3792743 1.436925 0.4335324 0.4344025  
1.043702993 1.178103 0.1117988 0.3460339 0.4221171 1.184528568  
0.2912856 0.3217795 1.08485 0.748127437 0.6264134 0.3175527  
0.3755018 0.5867153 1.194394 0.3507264 0.7034594 1.047554294  
1.325567806 1.188983118 0.2555651 1.237120498 0.251625726 0.9389084  
0.102991 1.490883011 0.3684009 0.2375391 0.3834 1.804411149 0.2021996  
0.45799 0.3652909 1.012170623 0.4598501 0.7453967 0.3151167  
0.9755972 0.3784679 0.7582177 0.3873264 0.1940303 1.599115  
0.6254965 1.09763 0.348145549 0.4482099 0.8039231 0.515922 0.6355103  
0.3565935 0.2445874 0.4550624 0.036205859 0.290612999 0.414146826  
0.3087323 1.020913 0.4962843 1.183171 0.9678132 0.859391632 0.452761  
1.350724 0.3705085 0.3755944 0.5816652 0.454242139 0.7043142  
1.746685 0.4632658 0.6024839 1.328344 2.086713 1.576382 0.757614458  
0.2700843 1.707273 0.599828177 0.0496338 0.6864797 0.7424707  
0.5041095 0.4561972 0.723651624 1.163088473 0.466356923 0.02541908  
1.65192 0.3609962 0.2945596 0.9384584 0.3881163 0.929051604  
0.4175719 0.667341044 0.2222896 0.6558213 0.6747971 0.4293522  
0.715157 1.019075096 0.8296232 0.5606682 0.2282533 0.6376122  
0.5815908 1.088656 0.7308237 0.808684576 1.045827 0.462242112 0.08802297  
0.1325137 0.968745669 2.014467 0.3810918 0.4199279 0.962446572  
0.1333915 1.193318 1.274954 0.708985838 0.3035049 0.3320313 0.01998311  
0.1174438 0.890657 1.355054 0.3672542  
AC004687.1 0.1070114 0.620274682 0.3718791 1.659762273 1.813107009  
0.317790308 2.836596 1.299023482 0.03929516 0.02326192 0.243885879  
2.465366 0.252897 1.177785 1.084946 1.894394 0.1627152 0.487881205 0.08719598  
0.4228883 0.225439933 1.261552 5.494771179 1.166273 0.6031987 2.630800433  
0.2742222 0.06259993 0.08357931 0.9605337 0 0.356956843 2.665117  
3.045614163 0.5226289 1.167766152 1.740792904 2.026651424 0.8555244  
1.002253 1.8250112 1.951252 0.171490797 0.2547218 0.197888322 0.1950602  
2.860088 2.854424 0.01812901 0.2602133 0.7529378 0.7835166 2.349634002  
0.2381076 0.97986186 1.848225 0.1083935 0.6365346 0.1590417  
0.6603769 0.0605714 0.4774744 1.400528505 0.2778853 0.1689862  
0.7821212 0.03954136 0.6679311 0.4374536 0.1565326 0.1564975  
1.88446658 0.1668177 0 1.027995089 0.2529169 0.161779497 0.8120188  
0.04529722 0.4118078 0.1553678 0.1083086 2.663447 0.043360506  
1.400161963 0.1007115 0.1532345 0.8068797 2.97457089 0.2614012  
0.6742517 0.4576212 1.942969609 0.9374194 0.9174361 1.307568364  
0.7220762 1.906935329 0.342553016 0.09947983 0.1284362 0.5339915  
0.4831387 0.040521053 3.804542 0.1770692 0.381774047 0.3747349  
3.717779031 0.66839875 0.0925454 5.695317618 0.09771605 0.4576034  
1.456129 0.5431451 0.7884335 3.099805926 0.8959707 2.15213 0.4519415  
0.03656366 0.2487783 1.646385 0.9758265 0.1929851 0.631824 0.7379078  
2.464292 2.082666468 1.246519904 0.3797966 3.422077021 0.9623804

0.1510588 0.79062548 0.4656681 0.0437292 0.044441722 4.598114503  
0.638846409 3.189382686 0.02190856 0.5800893 1.560992 1.292344 0.9354494  
0.5022906 1.937222056 0.221936 1.974048 1.518896008 4.673887 0.4828762  
0.255941769 1.948781 0.1248488 1.475880188 0.370224 0.7707772 0.601260671  
1.507058 1.745893 0.04268516 1.34908318 0.8125258 2.682103 0.160791189  
0.09318471 1.071184099 2.513764 1.012922 0.108393177 1.336526 0.908956172  
2.452311 2.880402 0.1898651 0.4290177 0.4577065 1.691595926 0.08084034  
0.3274455 0.7905823 1.293584 0.1022795 0.07608083 0.8492175  
1.114979 0.455438086 0.14610406 7.420502 0.492006 0.4981918 0.1649419  
1.241964743 1.119017 1.04903253 1.296798 0.4241997 0.195394378 2.434549073  
0.4229663 0.02219306 1.896621235 2.380416 0.2490357 0.2274291  
2.621516 2.566019 2.118084 0.8111048 0.08936351 0.1338966 1.129618  
2.814751 0.1935208 0.08024182 1.31295626 0.9056866 2.218587 1.081264416  
0.3999616 0.6276536 0.6704387 0.6338475 0.08475659 1.642216572  
1.394245 0.2126055 1.741145 0 0.2483279 0.094265338 1.625467 1.63174  
0.1991825 0.823415276 0.09200893 0.8052561 0.2699967 0.8975667  
1.728535172 1.020999 2.021143 1.642794104 0.6048619 0.4564164 0.07002244  
0.05224754 0.09960275 0.3962228 3.12101417 0.3621625 0.407515778  
0.2406251 4.505664 0.3317441 0.03381937 1.56539 0.2200686 0.3329642  
0.564820774 1.665287 1.759129 0.11156359 0.6555293 0.1762913 1.226885  
1.185398 2.398935 0.1541062 0.172689 0.6080148 1.149410118 0.01133642  
0.610823505 0.2866875 2.494202 0.2872143 1.558856166 2.089270109  
0.640035 0.5276277 2.108709 4.638386 0.3918312 0.120971302 0.2002284  
4.714242 0.7005077 1.074113375 0.3330876 0.130159 1.691232748 0.1506079  
0.39314497 0.3388659 0.8720725 0.589057436 0.6524886 1.469138  
0.14237856 0.800231747 0.1687176 0.1845811 0.3934299 1.510858  
1.738744 5.182534 0.6819003 0.9302 0.1154789 1.208165229 0.06754026  
0.067209726 0.3037566 0.112192366 0.3184259 0.17802 1.696825078  
0.5206731 0.1664374 0.4083197 0.875913267 0.3994439 0.5017558  
0.294221114 0.689672693 0.1263123 0.9482655 0.0994069 2.153860807  
2.533140759 5.129946804 0.1133193 0.351338 0.01588603 0.2016768  
0.1711245 0.08325838 1.070193 0.362676 3.826761 0.4736403 0.4814342  
0.3827582 1.895775 0.1399046 1.134883 0.1487181 5.628106 1.765165  
0.4466438 0.5826305 0.1201587 0.3336363 1.585303151 0.143889  
0.6498873 0.9915426 0.0988709 4.835243876 1.47229 10.28829 2.680682  
0.2500587 0.6705706 0.08082074 0.1640445 0.98826232 0.3953495  
0.1138423 0.274207023 0.127537 0.3924007 0.4656612 0.1386548  
0.5253814 0.208312104 0.681429672 0.7653868 1.437772 0.7203741  
0.095131663 0.893313737 7.288231573 1.710141 0.4557887 1.548977 0.243444  
1.308879 0.3228908 0.3925849 7.230087789 2.914375775 0.02706756  
1.720468334 8.778645 1.067556465 0.31896 0.6178897 0.3319662 1.016735  
0.9243622 0.4272024 1.076604 0.5852533 0.03889574 2.616643689  
0.668075 0.08175074 0.2313423 0.3653586 2.771723956 0.2946725  
0.4168085 0.4601687 1.30250905 0.514764 0.5395986 0.8415652



0.07800441 0.9709238 0.2065018 2.393494 3.562526224 2.096844336  
2.143389013 0.1164948 0.362948072 0.052570421 0.9546435 0.0143448  
2.959058727 0.3879159 0.4549178 0.1157016 2.333705086 0.1032635  
0.04100772 0.132284 0.217873856 0.3330541 0.4621681 0.4301229 1.0133  
0.0608236 0.7845026 0.2385052 0.1540421 5.259254 0.3581618  
1.031941 0.187034501 0.008142729 0.2939266 0.07839128 0.7302502  
0.2897246 0.1873665 0.2149477 0.037821198 0.224181275 0.075709226  
0.248082 0.6329965 0.008640437 0.9181403 1.176428 1.83137679 0.133542  
0.9185247 0.1196302 0.2790057 0.6730521 0.021900384 2.26518  
3.871355 0.5732764 1.439985 0.1693353 4.633171 1.251502 0.810409696  
0.536055 4.531269 0.417726495 0.04147858 0.2725008 0.9539834 0.6241192  
0.4670196 0.982718906 1.735685876 0.419710192 0.04248506 0.5739144  
0.2143528 0.3364203 2.272054 0.6060146 0.754218385 0.2726262  
1.47788321 0.01161036 1.20336 0.08971498 0.1560028 0.1572766  
0.338148484 1.204169 0.05324388 0.08477756 0.3139995 0.5071628  
1.990147 1.22997 1.165774802 3.612491 0.084984279 0.02758504 0 0.964597978  
0.5188792 0.5800803 0.5263957 0.458456242 0.04777467 0.9624591  
1.483301 1.153247272 0.2445782 0.138738 0.05844906 0.1962938 0.5117167  
0.7611268 0.6703594  
AC108010.1 0.8139876 0.928030661 0.9442474 3.305216951 0.751726066  
2.148329264 1.118667 1.540170117 1.615113 0.4097628 1.016741944 2.944481  
2.009792 3.794416 1.805924 1.253336 1.544594 1.38938166 2.147517 1.448466  
1.564397993 1.363781 1.215822871 3.359168 1.239636 0.970975512 3.183721  
1.102709 0.5060908 1.127998 2.567837 1.741906516 2.643704 0.942183378  
2.287075 4.069843862 1.80542055 2.713584784 1.802516 1.827903 2.771827474  
3.469438 0.385009095 1.435348 2.207697182 4.062379 1.486938 0.03174317  
1.34391318 0.7257529 2.595501 3.491523 2.33924204 1.201494 0.727645969  
3.515523 0.5496673 1.197186 0.8560283 1.270975 1.133662 0.7421291  
0.822351877 1.093958 0.9922408 3.498118 1.184098 1.757684 4.680574 0.9544668  
2.481058 3.389935159 0.76344 0.5186314 1.111914053 1.967703 0.407110619  
2.271789 1.502747 0.09672089 1.495121 3.793038 2.820611 0.85927832 0.963441391  
0.7391877 0.4623719 0.6864391 1.628417958 1.315608 1.162962 0.9160316  
5.995640232 1.810058 2.693466 0.505110681 1.878172 0.636193215 0.887372312  
0.9856996 1.618263243 0.984386 1.578002 0 3.797668 1.104683 1.382364624  
2.961096 4.956250506 1.394284941 0.7879317 2.689846996 1.338778 0.6717304  
0.3993127 0.7972997 0.8573083 2.044629221 0.4822486 2.053988  
0.1502081 0.6306571 1.108161 2.248448 0.9594688 4.292916 2.06241  
2.393112 0.8769481 1.973947513 2.594018585 0.9477761 0.406750942  
2.509811655 0.7695818 4.268588334 1.500517 0.5456274 0.684992669  
1.415594019 1.529478878 2.390402793 2.412019 1.49752 7.184991 1.587767  
1.263946 2.82381 1.518251404 1.886848 5.580353 2.62928663 2.225723 2.693551  
1.274713206 3.971743 2.396601 0.849931003 2.315627 0.8283816 1.739635892  
2.560098 2.129427 1.365964 2.88443956 1.550552 1.418647 0.944121704 0.9364769  
1.718696783 0.9959824 1.152348 0.954682452 1.761732 4.724091046 0.8891133

3.834908 0.9058039 0.5359732 0.2483041 0.774994825 2.121192 0.4929924  
3.402074 2.995159 2.059052 0.508771 4.030081 2.493309 2.587004957 0.571921946  
0.7599619 1.877801 1.023836 0.5773712 3.154107677 1.200391 2.94968242  
1.888967 1.317242 0.870037448 1.600911035 0.6862418 1.156515 1.291424408  
0.6145731 0.3655674 0.4552504 3.059736 2.112504 4.358695 1.728357  
0.6777608 0.6442505 1.83093 2.380104 0.2982791 0.5300527 3.648159695  
3.373883 0.8594157 1.34303394 0.2709767 2.407405 2.038613 0.7844925  
1.356144 0.844499141 2.933002 1.34823 2.370672 0.05881243 1.243685 0.138375045  
0.1514968 0.4834514 1.129674 1.447649544 1.845858166 6.847433 1.288094  
2.786577 3.513282869 3.280612 0.5200938 1.312774109 2.28551 2.439443  
0.2643124 1.291046 1.564447 1.463451 4.532171794 1.4698 0.309416474  
1.622908 3.720378 1.846456 0.804241 0.5435856 1.136229 0.7519517 1.122498376  
2.835651 2.558147 0.218356922 1.83099 0.4613096 1.988912 2.131829 0.901633  
2.054807 2.585655 3.962266 2.076621712 0.6656434 1.619317662 2.034049  
3.792078 1.378343 2.751935063 1.636937069 8.173889 1.133446 2.785896 0  
1.711515 1.045734556 1.175686 11.78206 1.128271 1.532926785 0.6871725  
0.2069865 0.803198506 0.04421641 1.074618294 0.8207625 6.051583  
2.697851127 1.295065 2.365296 2.09001948 1.605403196 0.7429976 0.967687  
4.057505 3.001727 1.940313 3.048687 1.931189 1.617352 0.4520403 1.710724722  
0.3470056 0.902027549 1.131884 0.658762766 5.48448 0.6609889 0.448084511  
1.513638 0.2901284 0.8241548 0.220419521 2.462696 0.4509447 0.499380207  
2.241725507 1.454816 0.5446912 1.814911 1.245029556 3.718476724 1.131416238  
0.6416165 1.067049 0.4430725 1.082105 1.088529 1.744378 0.6183604  
0.6331046 2.496632 1.084152 0.976548 1.732410176 0.6224836 0.9094972  
3.207691 1.84834 21.97989 5.621459 2.121732 0.6109011 3.263117 1.518241  
3.149363908 2.069948 0.5546453 1.944982 1.857737 1.931145322 0.1323196  
1.830089 3.039655 1.42749 3.452364 1.379182 1.549535 2.946736888 0.7737945  
2.005352 1.305131151 1.385395 3.312099 3.584515 1.044816 1.795685 1.959307445  
0.859405782 3.122553 5.986287 2.482732 0.937628177 3.295562344 0.684214299  
0.8514701 1.309043 1.7584 0.2923847 2.909997 1.406655 0.7943425  
3.439486458 1.588277966 0.4569332 1.931287186 17.58302 1.123088046  
4.230048 3.036544 2.231337 3.03022 4.310696 2.38704 3.753404 0.1227302  
1.008701 2.20692097 1.677493 0.9428922 1.414977 1.701433 4.172493857 2.06876  
0.4934243 3.468219 0.471625153 1.203898 0.9219452 0.7747173 0.5070941  
4.48887 1.642772 0.02054669 1.017351547 0.827581798 2.333715013 0.4417665  
1.87281245 0.987773039 3.26342 0.9686303 1.431855158 2.25062 1.541984  
0.3135545 1.897321208 0.6476761 0.9631442 0.7020493 0.33863703  
0.6205276 0.8406646 0.9793002 0.9061509 1.732126 1.306619 0.9252889  
0.8568882 1.297251 3.282428 3.063299 1.159227186 1.73318 1.992953 1.07881  
0.8770559 1.093618 1.637745 0.5096999 0.699538413 1.083230623 1.079606326  
0.990535 1.858391 1.471294 0.4924533 3.907145 4.427846535 1.437556 3.37895  
1.167283 0.6655369 1.262437 0.932299559 1.021102 1.009255 1.857924 1.167763  
1.795246 4.103293 1.373005 4.070750771 1.035384 2.75372 0.827811651 0.7002087  
2.210595 2.880461 2.393479 1.888768 3.772859394 4.110559895 0.19803399

0.2494606 3.802486 1.841316 1.457436 1.472914 0.864529 3.59820763 2.129046  
0.061398993 0.2897346 0.7520528 1.918991 4.202175 0.2193277 3.584957703  
0.4553007 1.750747 0.7777977 2.877319 0.17061 0.9181538 3.025788  
2.752924471 2.152517 1.156782808 1.714202 0.08127986 2.869854814 3.791469  
0.4841965 1.373712 2.573862086 0.8532476 2.655428 5.65813 0.916333774  
1.755229 0.899489 0.2941687 2.161094 2.219351 2.248189 1.979939  
AC004492.1 0.2130525 0.496345138 0.6383333 0.53537642 0.333422026  
1.117213941 0.9040174 0.765933657 0.1721149 0.5094423 0.683669311  
0.9288977 0.9740144 1.255451 0.8061632 0.5648565 0.6651879  
0.512867035 1.273077 0.9261367 0.942555467 0.7281883 0.398173797  
1.257735 1.027461 0.65845987 0.9645263 0.7197516 0.3203216 0.4454671  
0.8717227 0.422564923 1.149649 0.551237778 0.6046792 1.550963219  
0.725181622 1.095677211 0.9698747 1.130738 0.890381522 1.805617 0.28720018  
0.5398526 0.476718836 1.01457 0.4241026 0.2367904 0.53599078  
0.3989118 1.333985 1.961054 0.611377639 0.8473758 0.530169431 0.6841118  
0.5826715 1.197993 0.6800251 0.2892486 0.6964283 0.5740999  
0.749758821 0.7468891 0.6095508 1.846684 0.5195799 0.7492324  
1.341249 0.7383611 0.7197409 1.425702172 0.1934128 0.3352931  
0.513462814 0.8585371 0.134971984 1.820187 0.6150532 0.3968229  
0.9073592 0.5421686 0.9166175 0.498543554 1.245721928 0.5789722  
0.3169439 0.4417721 0.730987705 0.5724757 0.4614467 0.2186624  
1.990314816 0.6474763 0.9845128 0.366025333 1.553623 0.569487242  
0.529553181 0.3812611 0.585997373 0.4895397 0.8200172 0.266226592  
0.9165254 0.9209927 0.72461606 1.047676 2.437072086 0.539298892  
0.2837477 0.780911943 0.7371138 0.6458389 1.331654 0.4595805  
0.6608322 1.256051358 0.8175833 0.5444317 0.2427723 0.3403205  
0.4508948 0.843107 0.7258029 2.958498 1.05599 0.7704367 0.6541655  
1.077424182 0.851090271 0.3535 0.273076794 1.008976125 0.2919025  
1.320628814 0.4228545 0.2394203 0.364982135 0.703981392 0.999350612  
1.160621972 1.151528 1.401833 1.912107 0.707567 0.8148077 0.5617174  
0.539309557 1.134107 1.391134 1.286635388 0.9443873 0.8948177 0.760704862  
1.790986 1.051624 0.447537793 0.7755484 0.2110029 0.935102561 1.556839  
1.09646 0.4674082 1.348806502 0.5115928 0.7609884 0.352137037  
0.4395505 1.418464495 0.3897495 0.3604782 0.498506356 1.174794  
1.856135915 0.5176509 2.365559 0.2910667 0.3798223 0.3268662  
0.63710381 0.7524307 0.2390382 1.280759 0.7885622 1.215972 0.2591852  
1.273842 1.780028 1.149203245 0.31997183 0.5291055 0.7422823 0.4636977  
0.3056538 1.08463716 0.628379 1.035452177 1.24524 0.96474 0.413654989  
1.278649723 1.12132 0.7533526 0.525461953 0.3143623 0.1887906  
0.6112749 0.9832009 1.217313 0.9754195 0.8404196 0.3587989  
0.5213105 1.85542 1.335142 0.5933422 0.5271953 1.47878208 3.012641  
0.2024485 0.260219584 0.3593546 1.07897 0.5768239 0.6532438  
0.2598669 0.503967951 1.514695 0.8567255 0.6078941 0.05849538  
0.5758357 0.367010901 0.1695151 0.9179771 0.5155269 0.901650825

1.276179567 2.557917 0.7576033 1.174898 0.727988196 1.689434 0.4937769  
0.383193731 0.9076401 2.101648 0.372424 0.8200353 0.7852777 0.587823  
1.396419333 0.8864568 0.461622692 0.8972824 2.887373 1.574145 0.3555136  
0.3317657 0.4819562 0.5048312 0.323515942 1.556063 1.584222 0.24432727  
1.774594 0.2685792 0.7943914 0.679595 0.5583677 2.081229 0.6303226  
1.75525 0.912844962 0.4965412 0.519115201 1.953322 1.424118 0.5806219  
1.249545576 0.336850885 12.54516 0.648218 0.992898 0 0.4813849 0.441550687  
0.5846742 14.66582 0.4048401 0.620755662 0.3351622 0.3325603  
0.32680988 0.3518243 0.801618903 0.2226376 1.953268 1.367454761  
0.8050522 0.8649062 0.62362576 0.379714637 0.3694961 0.5389834  
1.104644 0.8557294 0.8936901 1.09498 0.8899942 1.068027 0.4777036  
0.468303437 0.542355 0.483627936 0.767579 0.402061593 1.069287 0.1834676  
0.629179709 0.380096 0.4100651 0.3632814 0.411058642 1.024757 0.358811  
0.140952037 1.690211524 0.2553483 0.4153454 1.360649 0.635452558  
1.597865832 0.885495312 0.2836256 0.3183889 1.148098 0.3350658  
0.6495966 0.5138619 0.6482716 0.4937355 1.86238 0.4395276  
0.6517824 0.454052503 0.4370314 0.569019 0.9262449 0.9988028  
13.18564 1.44147 1.100432 0.5468471 1.541312 1.193432 1.759074027 1.796189  
0.3640925 1.191445 0.7795078 0.834003283 0.4935237 0.9696515  
1.634674 0.7098975 1.298299 0.3539992 0.3436419 1.961416013 0.3565166  
0.8013784 0.363951982 0.4748262 1.289052 1.542153 0.8097538 0.9788681  
0.743451903 0.357323083 2.068061 2.003755 1.220955 0.416681811 0.772255722  
0.463994872 0.4818455 0.4556952 1.017691 0.7270212 1.391495 0.8440052  
0.4415043 1.832648975 0.573283967 0.4742295 0.886558123 12.10278  
0.779325812 1.85472 1.147274 0.7461469 1.248288 1.900437 0.8450443  
1.609646 0 0.482702 0.955086701 1.886632 2.455355 0.696638 1.020875 3.251866164  
0.9399527 0.8833759 1.18828 0.437387922 0.4585819 0.8330267  
0.437334 0.3416635 1.609666 0.6710725 0.1226156 1.198263756 1.061392147  
1.212378204 0.2338662 0.72260551 0.575653194 0.8305501 2.010592  
0.951418764 1.335001 0.3622845 0.5067792 1.598787177 0.7812452  
0.179616 0.3788457 0.084202873 0.3927525 0.7261153 0.6536194  
0.9947936 1.172207 0.925121 0.7088804 0.3728676 0.3304318 0.6783861  
1.355987 0.728196621 0.6241479 0.5824018 0.5794167 0.5815519  
0.3807028 0.5035962 0.2172652 0.314751881 0.38867907 0.521102197  
0.3042515 0.7835492 0.4163014 0.6186929 0.9822557 1.992275193  
0.8773815 1.429928 0.4006957 0.4582725 0.7779456 0.287774592  
0.429676 0.3938041 1.15766 0.6615956 1.050738 1.946982 0.8366723  
0.998335732 0.411921 1.041544 0.434545334 0.3633569 1.476255 1.070103  
1.298496 0.5218293 1.513621726 1.165700981 0.295449633 0.1395651  
2.530761 0.4694385 0.5750397 0.8587779 0.6168621 1.38456235  
0.6209412 0.183204004 0.203416 0.3913946 0.5613664 1.024951 0.3788841  
1.234257156 0.1997851 0.7695965 1.183615 0.3334145 0.4859313  
0.5603753 0.6687726 0.758523245 0.6167531 0.524513974 0.8054932  
0.03031564 1.150555624 3.813117 0.1743675 0.8325928 1.444396233

0.4359492 2.260183 1.464098 0.393907563 1.091104 0.40512 0.1645779  
0.494372 1.120673 1.849839 0.7252085  
AC010761.3 0.03168035 0.660362575 0.5564188 1.173186426 0.495789867  
0.544678041 0.3791475 0.423028689 0 0.1136291 0.095306105 0.4891915  
0.3691832 1.697111 0.6940095 0.724075 0.3179305 0.28598247 0.6941119  
0.7768488 0.36707404 0.4458576 0.394716042 0.8344052 0.6984264  
1.174935206 0.8118257 0.2548219 0.06804428 0.2207993 0.3411129  
0.314171516 1.525398 0.245902864 1.220265 1.717414181 0.462139791 0.883657475  
0.589982 0.8242046 0.500168003 1.491614 0.065701413 0.3210987 0.225549065  
0.6352162 1.212749 0 0.177112072 0.5084327 0.6061005 0.4252553  
0.946981898 0.2907752 0.337863485 1.102028 0.2888058 0.4210544  
0.1233146 0.2389473 0.1972516 0.457324 0.101351985 0.9460706  
0.2913384 0.7163404 0.2060271 0.4509408 1.044687 0.3921156  
0.5605998 2.744818784 0.1917332 0.1917585 0.46984974 0.3088602  
0.351224692 0.87108 0.7080527 0.0536423 0.4497398 0.2519346  
1.270055 0.176505066 0.712444636 0.08199206 0.08316834 0.3284518  
0.479541032 0.8208545 0.1646782 0.1083818 1.496782027 1.502877  
0.6274049 0.448222464 0.4950423 0.188180598 0.360906234 0.08098934  
0.034854513 0.08088141 0.2360021 0.065978668 1.393823 0.3243534  
0.497300863 0.8308623 2.42963522 0.429601823 0.1808252 0.580597858  
0.1414283 0.5960766 0.3647618 0.1205972 0.2535846 0.622571882  
0.145887 0.5319938 0 0.11907 0.2234896 1.173656 0.1498958 0.5801155  
0.4873128 1.229445 0.5674241 0.854454234 1.456575333 0.4019641  
0.225587822 0.700149899 0.2025573 1.44007647 0.3328802 0.1780059  
0.072362524 0.81923634 0.222901249 0.847218094 0.285382 0.1954208  
0.8041524 0.5031944 0.415405 2.853802 0.561357483 0.2710265 1.304797  
0.37330601 1.540177 1.161225 0.446505913 1.473232 0.3440222 0.295767573  
0.6290292 0.537867 0.170262018 0.8951252 0.7524956 0.1112038  
1.050573401 0.4630501 0.7072312 0.092403282 0.04668573 1.500790976  
0.4346605 0.2886271 0 0.3552992 1.520014181 0.1924333 1.172508  
0.2164043 0.1189023 0.1296111 0.350872877 0.2303504 0.1367091  
0.8816923 1.302857 0.09516411 0.08258607 0.7955513 1.662768 0.838296556  
0 0.8991613 0.4628647 0.4867104 0.08263623 0.992509046 0.1401575  
0.769845206 1.494306 0.9032309 0.296942024 1.004470323 0.2174835  
0.03613599 1.153418822 0.3895405 0.09357555 0.2356536 1.435887  
0.9174544 2.127288 0.4828317 0.1455067 0.1211211 0.1532756  
0.9292996 0 0.2939721 0.641348874 1.001676 0.5017262 0.193469871  
0.1669846 0.3736275 0.428861 0.3642587 0.2484098 0.783450269  
0.8222729 0.4154115 0.4519613 0 0.3805568 0.136433912 0  
0.5850035 0.2358692 0.530056555 0 0.6851125 0.6044829 0.2015819  
0.938166217 1.810222 0.3146714 0.126622021 0.5836269 0.3048873  
0.1628779 0.5104344 0.1946146 0.2081137 1.930724139 0.6590691  
0.091522789 0.4235668 0.8336792 0.7202193 0.1982398 0 0.8896423  
0.2919275 0.254678706 0.759224 0.7495399 0 0.5336849 0.1747245

0.729589 0.8084321 0.1509597 0.7109523 0.2999274 0.9900041  
0.370193639 0.1107516 0.415644266 1.244802 1.392411 0.539606 1.028558808  
1.043517688 4.376993 0.6286195 1.648089 0 0.3734644 0 0.1931989  
16.61164 0.4118856 0.145744342 0.2638469 0.2472542 0.134988271  
0.1961826 0.353181163 0.02758803 0.6777071 0.882405677 0.6883277  
1.260371 4.63657628 0.564625773 0.0610479 0.1431168 0.7555852  
1.060373 0.548891 0.9706616 0.6280534 0.5293762 0.1253529 0.313359754  
0 0.156335248 0.4185023 0.033214173 1.278915 0.03410144 0.409313553 0  
0.03387534 0.2077654 0.081497799 0.07433111 0.2000785 0.239533722  
1.016015097 0.09492406 0.4296402 0.5260448 0.327081254 1.25473358  
0.740648509 0.105436 0.5917949 0.3103984 0.158529 0.2229077 0.3697255  
0.222453 0 0.9415656 0.4705676 0.5701079 0.51935711 1.1914 0  
1.767538 0.2582946 17.90177 1.461428 0.9090633 0.4818651 0.5030979  
0.1810818 1.686436385 0.8434378 0.1968713 1.114424 0.2146496  
0.30064028 0 1.783336 1.751162 0.1809598 0.7912036 0.06579845  
0.2090399 0.603429209 0.6311082 0.1588838 0.568246472 0.1661304  
0.7187951 0.7027367 0.3010207 1.276799 0.276373403 0.062509425  
0.7445107 1.532331 0.4283831 0.309797499 0.765549427 0.137989657  
0.2931103 0.419471 0.7398255 0.03603539 1.696676 0.4409508 0.1727646  
0.981036461 0.511474994 0.04407293 0.823930521 16.79101 0.52147673  
0.6447088 0.8311119 0.5974236 0.9030025 1.535815 0.3365782  
0.6742259 0.04537821 0.08444298 0.822214709 0.5152725 0.4944129  
0.3139038 0.4513015 2.256538792 0.6258292 0.2189262 1.610377  
0.254498261 0.426187 0.2592605 0.1858012 0.1088667 1.536588 0.4989337  
0 0.712714795 1.127330336 1.525424834 0.09484171 0.465614746 0.102717756  
0.6813828 0.8408525 1.307962469 0.9023237 0.8619322 0.05796673  
0.857406678 0.09171247 0.1335422 0.231961 0.041735826 0.2920064  
0.3271862 0.2001001 0.03792903 0.1980728 0.3930374 0.4160868  
0.5280423 1.193263 0.4413248 0.4729633 0.372215733 0.1591014  
0.4557981 0.5424748 0.7206271 0.2426122 0.1941423 0.1346116  
0.024633045 0.243349748 0.316990387 0.2908376 0.7618075 0.05627539  
0.1724963 1.676085 1.05245336 0.4711212 0.5766145 0.3437446  
0.283933 0.09132512 0.023772962 0.638917 1.205599 0.7516018 1.016568  
0.1531785 1.725931 0.3432027 1.814387941 0.3981353 1.892916 0.340082943  
0.2251259 0.9341077 0.5809201 0.7875752 0.465568 0.808851089  
1.356548079 0.439325906 0.03458829 0.6061492 0.7497496 0.3206509  
0.5258155 0.4725268 0.902986028 0.2840995 0 0.03780929 0.7371919  
0.08347371 0.5334263 0.05121734 0.897261805 0.1188301 0.1387115  
0.1725495 0.557751 0.1376318 0.2777545 1.215436 0.385138055 1.454704  
0.553504824 0.05988737 0 1.149913046 1.652187 0.3333598 0.04761707  
0.602425976 0.05185961 1.246152 1.156572 0.379001949 0.3539877 0.1129505  
0.1087658 0.095885 0.9089521 0.4836331 0.5260323  
SDCBP2-AS1 1.00897 0.869347524 0.7566573 1.009842332 0.321455942 0.66307639  
0.2797358 0.796284108 0.4248583 0.4610968 0.21485757 0.5838516

0.5831812 1.54847 1.633102 1.460212 0.3431668 0.464977959 0.5082374  
0.7121085 0.631931799 1.01036 0.81704016 0.9305147 0.6870671  
0.583932857 1.031553 0.4010839 1.368037 0.6108981 2.235702 0.869236248  
0.9055274 0.660194855 0.9871858 1.291246854 1.079730744 1.337884745  
1.39454 0.9040416 0.911708551 1.859872 0.609972374 3.22128 0.582436828  
0.7469328 0.6501985 0.623474 0.598920753 0.5522638 1.199261 0.5266588  
0.600869115 0.5840105 0.457006572 0.8964708 0.6984336 0.8602746  
0.2729452 1.192935 0.509364 0.6935743 0.679230632 0.5007482 0.4697056  
1.027672 0.4021857 0.9133077 1.019911 0.7714764 0.9650936 3.262713375  
0.5226203 0.3159715 0.668035035 0.7368045 0.35785204 1.048188  
0.4679857 0.6794118 0.4839026 0.3841475 0.982759 0.481835342  
1.279064601 0.3528811 0.3511256 1.428292 0.841272691 0.8299346  
0.3341247 0.772988 1.484987298 1.022198 0.9258011 0.39368973 0.8725252  
0.358669994 0.564830627 0.4481557 0.295730838 0.4475584 0.9286549  
0.081131974 1.23023 0.443164 0.463732851 0.8141562 1.296335849 0.820576888  
0.4965934 1.074881821 0.5869464 0.3135514 0.5446515 0.37568  
0.5768768 1.077249239 0.4066238 0.8532739 0.2697583 0.5527235  
1.040875 1.233288 0.4239415 2.793956 0.3728566 0.7730854 1.34565  
0.991594876 1.259647158 0.406833 0.432741705 0.746159421 0.6582792  
0.933704315 0.7231544 0.7704874 0.444910045 0.884264711 0.554280861  
0.937618644 3.399592 0.7930003 1.0065 0.4218838 0.9833111 1.360898  
0.880934297 0.8035585 1.252269 0.774635269 0.8466889 0.824031 0.772337129  
1.167081 0.8729878 0.522813645 0.9153063 0.5291191 0.446647594  
1.017206 0.6991315 0.7794406 0.790773912 0.6751442 0.7392117  
0.431776994 0.5425059 0.683325387 0.6992896 0.4766015 0.876788081  
0.5570484 1.426430262 0.4141016 1.482034 0.4561815 0.5300132  
0.5379035 0.556580531 0.5584169 0.504321 1.947206 1.356431 1.380841  
0.2301881 0.9037309 1.105783 1.217169923 0.726454854 1.202418 0.8099738  
0.6932545 0.8027607 1.339453081 0.5055524 0.893406025 1.082529  
0.6860056 0.513805037 1.30133646 0.2852617 0.4399098 1.249040413  
0.4071552 0.6098553 1.535814 0.8410996 0.7317833 1.256406 0.5902311  
0.4174922 0.2442599 1.512539 1.63099 0.6354522 0.6787953 1.13790544  
1.597829 1.190728 0.542421246 0.336751 1.621547 0.7383004 1.17454 0.4955274  
0.586408337 1.147406 0.6810919 0.540606 0.3315699 0.7545842 0.234876124  
0.3306198 0.8212706 0.3625516 1.284418636 0.42985115 1.130061  
0.770344 0.9006277 1.428732148 1.276528 0.4127381 0.595565023 1.036134  
1.059123 0.4206006 0.9380117 0.4746348 0.46064 1.715661611 0.7165973  
0.551459761 0.5625151 1.373701 1.11811 0.4035739 0.8492809 0.9602592  
0.4205129 1.061300739 1.044737 0.7439328 0.282941174 1.841163 0.4204989  
0.589558 0.7157552 0.510484 0.9925157 0.7468437 1.516189 0.895258004  
0.4448804 0.825069817 1.160778 1.237782 0.9333757 1.081189479 0.554334699  
10.87985 0.8142208 1.135744 0.1031895 0.7845315 0.915018952 0.5315649  
8.044881 0.3467462 0.710895741 0.4974817 0.273637 0.451495518 0.6433062  
0.977166463 0.3154947 1.488136 1.075632232 0.5041694 1.866134 0

1.004069323 0.7506876 0.3977294 0.8968031 1.606415 0.7282406  
1.605575 0.9157251 1.421258 0.5035326 1.036106928 0.5544443 0.392171092  
1.885379 0.771922589 0.8415765 0.6625495 0.467369045 0.5887064  
0.3832304 0.311689 0.32068922 0.6352489 0.5084629 0.39027528  
1.216485093 0.8676577 0.7363399 0.7588181 0.424546488 1.516645712  
0.95629075 0.2463377 0.688901 0.2417354 0.4316492 0.6441416  
0.7880431 0.5014969 1.063721 0.9534945 0.7008006 0.4767102  
0.989888508 0.8656985 0.2881229 1.292802 0.635234 12.2855 1.521522  
0.586249 0.6814152 1.646281 0.7259069 1.739418995 1.503867 0.3933909  
1.068188 0.5410936 1.150654739 0.8783376 1.035802 1.095959 0.697232  
1.179178 0.3721877 0.5683663 0.97286892 0.6580943 0.3777243  
0.80523255 0.5515709 0.5990746 1.077894 0.5256216 0.8195618  
0.852709587 0.342053486 1.233938 1.031109 1.382144 0.495233213 0.894304351  
0.429860339 0.6567814 0.7022962 0.818767 0.1772465 1.475712 0.7549425  
0.5268596 1.228690729 0.698828164 0.2872343 0.724411165 9.19074  
0.541495086 0.7179054 0.9197939 0.6086965 1.554553 1.364789 1.374082  
0.9492911 0.4966219 0.5659115 0.859394699 1.295391 0.6781144  
0.5751371 0.4742316 1.262816041 1.023519 1.012218 1.295402 0.667624156  
0.7092405 0.5773909 0.7025581 0.4774702 1.311746 0.885608 0.4315869  
0.749812184 0.621829476 1.318722331 0.342097 0.629807625 0.35366498  
1.513413 0.8386653 0.9945585 0.9344963 0.4305811 0.3492717  
1.06391188 0.3608834 0.8374851 0.4930497 0.23607791 2.282668  
0.6920093 0.4991444 0.5923303 0.5260986 0.718918 0.6651442  
0.3084259 1.178171 1.899393 1.47846 0.549242929 1.848819 1.216244 0.5571953  
0.8418267 0.4872771 0.4604096 0.4138194 0.630042623 0.695732611  
0.584690254 0.5602936 1.080043 0.4290409 0.4383679 1.31906 1.198305648  
0.4367208 1.094589 0.5664078 0.5935445 0.3144393 0.473572875  
1.103491 0.690416 0.8645948 0.6250214 1.619887 1.55409 0.7227196  
1.561768624 0.6590432 2.65565 0.56873802 0.5481245 0.7523618  
1.068404 1.283987 0.5305119 1.31462784 1.033299112 0.396165582 2.309497  
1.422402 0.8647203 0.5487268 0.9929612 1.387689 0.777262246 0.45852  
0.413149558 0.316152 0.7395153 1.401106 0.5840973 0.4188198 0.982971835  
0.7086907 0.5543504 0.6153189 0.6744187 0.490801 0.6546304  
1.409665 0.679943705 1.598258 0.900285429 1.215088 0.254986 1.317446567  
1.796159 0.7560793 0.5386901 0.76010985 0.3443591 1.239815 1.815398  
0.45757366 0.4933263 0.3796378 0.267492 0.6013251 0.833626 0.7694047  
1.76589  
AC087500.2 0.1269759 0.973071477 0.131185 0.503803809 0.858083922 0.791369069  
0.5525947 0.358666122 0 0.265667 0.159162471 0.8073451 0.4552917  
0.5781765 1.106323 2.205608 0.2123793 1.018868379 0.3477528 0.4245866  
0.568435392 0.382931 0.79101729 1.239706 0.6560896 1.0301327 0.6778799  
0.1021334 0.1704523 0.8112233 0.2734383 0.598124526 1.159522  
1.108784903 0.7078875 1.180020208 0.802650823 2.407267943 0.492639  
1.453513 0.766498898 1.375041 0.230416703 0.7239228 0.387431956 1.07408



1.215184 0.1411232 0.147889766 0.08490894 0.7453442 1.887055 0.910928129  
0.5341583 0.564236543 3.227781 0.8360032 0.7139844 0.07413733  
0.2873126 0.1482357 2.749454 1.218666035 0.2472966 0.09730781  
0.7576554 0.5935174 0.6644798 1.110226 0 0.5106595 1.609949542  
0.1600985 0.269001 0.971011003 1.052234 0.025137854 1.340416 0.266053  
0.3225001 0.9576162 0.1514643 1.148449 0.212231392 0.90424198  
0.4929402 0.4722336 1.795153 0.640671955 0.5483352 0.2475133  
0.4886974 0.852152053 0.9647137 0.4789827 0.41704233 0 0  
0.197253243 0.121728 0.139698008 0.1215657 0.2758887 0.528889241  
0.682793 0.3250047 0.124574865 0.936597 1.320414376 0.200883423 0.1509902  
0.840325369 0.4251367 1.42682 0.8876288 0.3222383 0.2540938  
0.356469729 1.900339 0.7184749 0.2782469 0.3877547 0.279923 0.8820097  
0.7209448 0.3390802 0.732437 1.399902 1.299574 1.765850637 0.550303348  
0.3408064 0.994579561 0.734963243 0.5509024 1.268062955 0.2594267  
0.107018 0.14501566 2.189017048 0.173715766 0.471621853 0.3931882  
0.5548042 1.755421 0.6417152 2.046509 1.115915 0.776764595 0.9354103  
0.7972056 0.935139052 1.452489 0.4363339 0.208787838 0.9652013  
0.3760506 0.777948894 1.103012 0.3143858 0.22747188 1.020636 1.005342  
0.6407059 0.765587626 1.425081 1.275572 0.092588831 0.2105076 0.365790311  
0.8347721 0.1652609 0.318323336 0.4153481 1.00201738 1.494353  
2.732239 0.5885627 0.804202 0.1298713 0.738312626 0.3297328 0.08219014  
1.519556 1.261958 0.0476776 0.2482557 1.214703 0.6800436 0.807672964  
0.039728765 0.9009669 0.3924412 0.6502503 0.9522249 1.541478156  
1.404389 0.747285108 0.5208023 0.6920929 0.382549234 0.647027571  
0.2179202 0.325877 0.410099489 1.014839 0.06250897 0.3035917 1.098697  
0.8944508 0.8397052 0.4838012 0 0.1213643 1.036688 2.708846  
0.3473077 0.06545831 1.254671699 1.031568 0.553007 0.155086692 0.8031358  
0.3523555 0.9375757 0.4866535 0.6637564 2.082018747 1.146329  
0.665993 0.4528689 0 0.5243163 0.205061814 0.378856 0.5861782  
0.6499429 0.781060185 0 1.491336 0.3579117 0.7069534 0.470025043  
1.073507 1.44514 0.158595353 0.4385991 1.298373 0.2611279 1.193405  
0.4550125 0.3336505 1.058555316 0.55612 0.504386132 0.3395339  
2.464292 0.7667696 0.6621262 1.208332 0.5200001 0.7103905 0.311899022  
1.593949 1.931259 0.42471079 0.5941739 0.1750753 0.348121 0.4252791  
0.9453926 0 0.3005297 1.923863 2.060761112 0.4069046 0.178490954  
1.507156 1.133606 0.5046436 1.030624188 0.543718815 0 1.133787 1.238549 0  
0.3430298 0.482454713 0.6049591 0.07888624 0.1904828 1.363012009  
0.1762512 0.07078592 0.45988173 0.06552552 0.221181476 0.5805119  
0.9054239 0.499752543 1.649306 0.7216583 5.57506401 0.56575956  
0.3058524 0.2581276 0.9875249 0.5950011 0.7236752 1.349105  
1.371007 0.2946885 0.2093409 0.627977982 0.07346246 0.156649174  
0.1524882 0.399370417 0.5541548 0.3758691 1.230406404 0.6329546  
0.3054903 0.1249095 0.694122318 0.2606813 0.2338936 0.270016553  
1.339546431 0.1902293 0.5112222 0.4460086 0.910383454 0.53500133

1.401811982 0.1584716 0.5534511 0.1036739 0.2042323 0.5583882  
0.2469786 0.6686991 0.4477846 0.6659692 0.2095611 0.5712527  
0.468359996 0.976739 0.7825988 1.081053 0.3882198 0.2562531 0  
0.4453234 0.3319475 1.4003 0.2540236 1.551878085 0.3286622  
0.7397499 0.9448675 0.5377015 0.753109938 0.7843526 2.775425  
1.571354 0.1813232 0.8879275 0.5604099 0.1861864 0.604640915  
0.2023601 0.424541 0.216909535 0.374544 0.2400795 0.3335437 0.4222752  
0.5629199 0.352454289 0.720301883 0.4216554 1.322157 0.388363 0.133036964  
0.767086674 0.82960047 0.5221313 0.6466358 0.5054394 0.3610775  
1.036636 0.169937 0.3808453 1.711159313 1.879174193 0.4416143 0.5779095  
0.08628066 0.406407456 0.7895597 0.920442 0.3705763 1.759364 1.231119  
0.2698033 0.8444747 0.409224 0.08461254 0.861314185 3.040475 0.3429732  
0.377441 0.4933175 0.73830857 0.8361145 0.3071121 1.389498 1.246712143  
0.7402076 0.9525307 0.3258051 0.1818089 0.9178824 0.1956269  
0.4567307 1.229918024 0.968223473 0.833720692 0.1267095 0.322995957  
0.205848034 0.2560316 0.280847 1.20360205 0.4621138 0.2968841  
0.2323325 0.781025799 0.2144255 0.1784138 0.06640764 0.543655233  
0.1671958 1.180236 0.1432157 0.1520208 0.4366353 0.4922833  
0.5003068 0.2116411 2.637483 0.6633165 0.4489702 0.101717224  
0.6908239 0.7307413 0.2877692 1.335837 0.4321767 0.2501127  
0.5934802 0.17277756 0.518156604 0.247043156 0.4533225 0.3592175  
0.2255536 0.5761423 0.9596862 1.718553173 0.2905029 0.794437  
0.2296233 0.05690063 0.3965368 0.119103496 0.4947 2.243465 0.6073476  
0.5914505 0.276275 1.338888 1.289595 0.371870037 0.6751204 0.2586432  
0.238536088 0.3158092 0.5147909 1.290714 1.14555 1.150707 1.127617792  
1.057211611 0.978240193 0.8317859 1.037584 0.6476337 0.4819422  
0.3010693 0.2785151 0.723839402 0.6405074 0.636922085 0.03788521  
0.5831623 0.08364133 0.6108542 0.1539606 0.408665243 0.7144123  
0.5907077 1.037376 0.403629 0.8964034 0.6030098 0.4982222 0.578867137  
1.14075 0.605035941 0.1800229 0.09033816 0.6463685 2.408007 0.7794015  
0.1431381 1.443476595 0.7015106 0.9459501 1.908767 0.517858632  
0.3251403 0.1509031 0.1907223 0.2241809 1.404115 0.7874819  
0.4743797  
SOS1-IT1 1.248039 1.329336689 0.9638015 2.100789569 0.502187619 1.365473969  
0.8503745 1.268982269 1.069336 0.828961 0.530947727 1.087819 0.7345391  
2.309614 1.707201 1.083364 0.759078 0.746022496 0.7783976 0.8711813  
1.022479761 1.381331 1.623036273 1.259432 1.181171 1.11040278 1.572162  
0.5272821 1.353832 1.947606 1.656002 1.137656648 0.8163054 1.533003689  
1.405614 1.630408703 1.176945483 1.131811783 1.812943 1.233178 1.229303993  
1.67382 0.823546782 0.841177 1.12831061 0.8372988 0.8879567 1.232972  
0.751761184 1.011595 1.523841 0.3263537 0.723512294 0.8485193 0.717039357  
0.944518 0.7150796 1.147065 0.9912173 0.8177181 0.7849165 0.4610196  
1.492234208 1.227609 0.4637253 0.9976782 1.373227 0.9288729 1.952572  
0.6085297 1.115388 2.05127343 0.8392533 1.190371 1.028311493 1.614136

0.34940415 0.7675288 0.6574238 0.9605564 0.7605947 1.223068  
1.244982 1.727807244 1.115102739 0.7341036 0.8273725 1.152534 0.839617456  
0.955724 0.4150224 0.9703799 1.516096743 0.7008219 0.8797583  
0.216579583 1.904241 1.272995227 0.626680159 0.9023789 0.707346494  
0.4344957 1.893882 0.735130739 1.023002 0.7170492 1.517150985 1.250165  
2.048340184 1.17385672 0.7315441 1.129506164 1.209979 0.6325193  
0.8501551 0.7198326 0.8324915 1.380254204 0.5031202 0.8099615  
0.7071998 0.4619661 0.933791 0.9977439 0.5129689 1.346587 0.6463825  
1.34538 1.193478 0.9562784 2.090397156 0.8489772 1.059255353 1.870655683  
0.9326912 1.354469489 1.000823 1.104999 1.439748774 0.959876993 1.241776813  
1.248632018 2.526734 0.8553948 1.039979 0.9283597 1.308631 2.174266  
0.797782479 1.461949 1.177728 0.965564629 1.135626 1.155206 1.160820422  
1.927822 1.642747 0.662027596 0.8760762 0.6599308 1.185656358 1.68271  
0.8151369 0.6748271 1.786218499 0.5659414 0.8020644 0.931499757  
0.8638535 1.823895443 0.7495062 0.4594096 1.109647056 0.9307715  
1.687224672 0.8423179 1.584176 0.6519988 0.8989733 0.7220597  
0.68414615 1.374938 0.5004816 1.768278 1.883671 1.325392 0.5586743  
1.703454 1.647397 1.488282353 1.088644188 2.549327 0.9634355 0.9038168  
0.5096889 1.569909494 0.4833608 1.120062616 1.56412 0.5285583  
1.350413032 1.513170805 1.298137 0.7045941 0.903146461 0.6200341  
0.546131 1.192255 1.02848 1.006435 3.052546 0.9154505 0.5983103 0.3566601  
1.524811 1.159806 0.7021689 0.6368875 1.434036015 2.170121 0.878461  
1.016225955 0.9967146 1.233139 0.977389 0.5475822 1.065371 0.487965489  
1.010065 0.5840716 1.079085 0.5191815 0.8328852 0.705778937 1.003032  
0.3879808 0.9268542 1.538501708 0.874353868 1.814363 1.410438 0.9358395  
1.292266127 1.131956 1.106076 0.906952947 0.7257521 1.182897 0.4666568  
1.636208 0.9809361 0.811577 1.333629499 1.15947 2.385467777 0.6910489  
2.15633 1.110553 0.8326738 0.9161037 0.6195216 1.062087 0.923351344  
1.58251 1.278265 0.626470187 0.8966625 0.6555453 1.396315 1.415465  
0.5706733 0.9984948 0.9846302 1.814553 1.718615606 0.6316844  
1.287725408 1.114515 1.604516 1.145193 1.505134444 0.813877224 18.37102  
0.8004622 1.625884 0.4823375 0.8173629 0.801223181 1.162795 14.53621  
1.008617 1.391893329 0.8515995 0.6887233 1.042079315 0.8457181  
0.895943721 0.4940105 2.452783 1.282397766 0.797894 1.381781 3.50553267  
1.417209999 0.6558998 0.5695 0.7712775 1.468388 1.023118 0.7475847  
1.401332 1.439461 1.579573 0.817439707 1.006506 1.02024333 1.695611 1.440631645  
1.072846 0.7327731 0.616604896 0.3439728 0.9705528 0.5621926  
1.19991536 0.9760848 1.061554 0.810193208 1.893823825 0.1385003  
1.025792 1.529699 0.896618804 1.306657555 1.21164216 0.5454252 0.7535711  
1.338088 0.7660069 1.212246 0.774851 1.136006 1.371818 1.079943 0.9986739  
0.7486417 1.425995586 0.7650083 0.8805797 1.379297 1.130605 13.8062  
1.628315 0.8681772 1.354213 1.590446 0.5764582 1.574978875 1.454381  
0.6071376 1.091591 1.161641 1.540271977 1.051276 0.936117 1.42487 0.5040612  
1.271958 0.8116716 1.451074 1.200602773 0.5123149 0.7270773 1.033693286

1.156885 1.207673 1.972181 0.8265107 1.016145 0.729842971 0.596979967  
1.352494 1.761515 1.388073 0.968602457 1.30991978 0.311155306 0.7646163  
0.9373125 0.9367155 0.8747059 1.663181 0.9313199 0.7699734  
1.47477092 0.474902221 0.8067385 1.245882817 11.10172 0.806981313  
1.610544 1.357699 0.883 1.836569 1.6949 1.160757 1.395121 0.45143 1.881718  
1.516930704 1.571978 3.072172 0.911848 1.028532 1.575970864 0.9214262  
1.271902 2.483147 1.181502428 0.9949349 0.7107036 0.8132879 0.8375388  
1.9049 0.9495343 0.7436624 0.8508246 0.640849667 1.545109162  
0.8051209 1.268458869 0.735734359 1.474326 3.345976 1.125921408 1.835189  
0.7502814 0.5881959 1.364739816 0.8880409 1.186793 0.830731 0.647704081  
0.9461764 0.6119217 0.8645019 3.244989 1.734006 1.2121 1.368729  
0.598848 1.089318 1.793781 1.426393 0.605923175 2.490221 1.904429 0.9015545  
0.5448377 0.5256168 1.048452 0.8677615 1.107642333 1.18623299  
1.23335831 0.6558148 1.141246 0.7389848 1.029613 1.619758 1.318442001  
1.427669 0.7026914 0.902782 0.8134884 0.7752682 0.974369173 2.357518  
0.5619809 1.119147 0.6263527 0.9143071 2.52563 0.7852747 1.657302773  
0.6337146 0.7018841 1.028493264 0.6002101 1.18946 1.688499 1.091835  
0.8028016 1.301447628 1.379505786 1.301433903 0.7157073 2.020074  
0.6172662 1.073929 1.599161 0.8184879 1.077966574 1.144639 0.180671678  
1.143444 0.6484541 2.341757 1.324126 1.834267 1.395718903 1.040285 1.048743  
1.290846 0.9740874 0.2738369 1.142101 1.055246 1.44499165 1.182899  
0.911051926 0.7745003 0.8610221 1.249977444 2.316015 0.8548733  
0.757924 1.08395737 1.341361 1.607844 2.450052 1.028283886 0.9273357  
1.123651 0.5518302 0.4832991 0.8740992 1.419322 0.7535601  
AC114803.1 0 2.05677899 0.8927749 3.025252778 3.471253693 0.611755754  
1.880332 1.096442649 8.623455 2.491681 1.274323324 4.709451 0.4100919  
0.4901432 0.2024617 0.4647118 8.161919 0.815749924 8.75776 1.246455  
2.355883547 2.606024 0.738876279 20.91305 10.43583 4.084568426 1.953863  
1.635448 2.29272 0.2952274 0 1.411448366 3.333668 2.498826427 1.133531  
1.456528159 5.635430685 1.329215474 0.6310848 1.957208 0.377656643  
1.196649 1.31772529 0.04293361 3.257044534 1.019205 0.9340118 34.68773  
0.852529815 2.583307 3.536324 3.606564 5.591517036 6.298415 7.288267005  
3.400395 1.235705 1.922812 1.503724 0 15.98277 1.076206 1.300955381 1.517972  
3.064414 6.321531 0.3305709 0.6384134 0.6603221 5.851096 4.08856  
1.074162476 0.3076363 2.338344 1.460632161 0.1651889 0.080505798 16.1728  
0.8520538 0 4.690454 1.455226 0.2485129 3.908196732 3.429355691  
12.30052 0.6672187 0 1.128489057 3.414606 3.875321 0.1304241 2.18326288  
0.9419407 2.061281 3.287651037 0 6.944529664 1.526651305 2.793872  
1.174406568 2.919923 1.640885 0.529314393 1.391533 6.592057 3.457653482 1.91636  
0.594664111 0.321671847 1.547383 4.140311983 2.099027 1.487742 0.4180435  
2.38648 4.679084 0.856215074 8.972911 1.744282 2.628762 0.143286 5.558137  
0.8559697 7.69626 0 3.648839 1.165655 0.5202474 1.71371649 0.459752944  
3.770489 4.7778195 3.316680076 2.135737 6.021576698 7.952257 0.05712214  
3.657332238 0.511181232 0 1.913177265 0 4.598778 10.13779 1.761548

5.665403 1.507696 5.747317329 0.3382263 1.8893 0.748712617 0.2180485  
0.4269806 2.626871334 2.500176 2.157756 3.262596879 2.607303 5.46572  
1.548052196 1.089554 3.689218 1.3382 3.218052812 4.563926 2.893622 1.532032558  
5.692957 0.260326652 1.627298 2.778616 2.7185427 5.795794 2.182142544  
3.010406 0.08750193 0.9920603 11.49443 2.807476 1.632630676 1.53119  
1.228359 1.754199 0.5574497 0 6.934663 0.4862718 1.143392 3.052224697  
0.063617122 8.656235 1.94236 0.9110822 1.59108 2.547971776 1.724102  
1.119416195 3.596425 4.773952 1.225141598 3.798946444 0.6397463 6.84167  
1.671565997 3.125092 4.904643 0.1620457 1.968773 0.2784973 3.568384  
3.964663 0.5447535 2.254332 2.336344 0.2711023 2.982928 0.5240875  
5.488241601 0.223221 4.910625 1.862536316 5.894397 0.5289581 0.8132188  
0.9091501 0.575718 2.18616907 0.9178004 4.265782 10.61389 0.06978067  
14.04389 0.109454216 0.6066568 1.799058 1.608423 1.951093365 3.044775688  
1.629943 0.7053773 5.983612 0.521061647 0.4742047 2.019563 1.015826184  
3.453087 1.89562 2.090702 1.501487 1.405167 0.6678375 0.584499997 1.725358  
0.440545386 3.567972 1.404522 1.733389 0.8835445 2.110784 2.022196 3.412615 0  
0.4060587 7.301731 2.671756668 1.33202 2.242766 0.5574413 1.394415  
15.01733 1.87884 3.067867 1.058975 1.385944676 2.428582 1.095624538 1.914067  
2.978835 2.020197 3.247412257 1.272487614 0 7.732761 0.4958179 1.047232  
1.148513 2.317644183 3.87485 0 0.6608711 1.403082182 0.2351904 4.25057  
0.866355594 1.678802 2.05421407 3.496938 7.818795 4.493693781 0.8643309  
0.1650831 7.43939409 2.020949683 0.2938544 2.112607 1.63402 1.429151  
0.9734014 1.205751 0.827764 0.8965731 4.223706 0.391055957 5.528818  
4.314450699 0 0.746090715 0.3882202 2.571644 2.392425498 12.53591 2.50024  
1.00008 3.661373784 1.729333 4.922402 1.345162848 0.772198985 0 0.861698  
0.1947784 8.105281471 3.983609582 1.188371723 1.94548 0.633024 0.6640463  
2.071218 2.50359 3.519802 1.963094 0.102433 6.042974 0.5872427 2.835691  
1.249963977 0.3910096 3.498418 2.173052 1.139694 1.367782 2.344863 3.565451  
1.884561 1.210832 1.975713 2.761112134 1.729213 1.816312 5.731073 0.7576923  
0.602972266 2.040956 1.948164 0.2096823 1.40336 2.894431 3.272785 1.155284  
11.726015767 0.3240365 3.314082 1.997171874 0.8663086 5.125813 1.483608  
1.883654 4.056281 1.652827667 4.663786022 4.051146 3.073284 1.145569 1.420201673  
1.166909021 15.8673316 1.410888 0.6212694 5.827343 4.278594 0.1327961  
3.591955 1.108804 0.641289643 2.461987353 0.2828604 3.767693858 0.5526401  
4.927293708 6.264087 1.19315 1.232443 1.609854 1.74138 0.9360699 0.4327186  
3.567661 0.4064667 0.299828369 2.939575 0.4881762 5.439519 9.150168  
10.787970152 3.045903 0 0.8971712 0.27222858 1.322048 12.15597 0.5962368  
1.45564 2.84476 1.392243 2.340341 1.33414404 1.188642193 5.043429355  
8.166654 1.436691555 0.43949548 0.4783099 0.07495273 0.04282914  
1.576471 0.7779215 7.766144 1.938501009 1.471528 0 0.4785194 1.406269212  
0.3346605 1.732404 0.1834634 0.304286 1.843287 0.07882864 0.8901493  
3.092443 4.561234 0.2023161 3.834292 0.92297751 0 0.07313287 0.9216017  
0.5781236 3.892717 6.942036 3.974114 3.517614608 0.829717005 1.695371954  
3.162846 0.6471113 1.309262 3.690275 0.3841831 1.751206186 2.093302

6.823194 0.4780003 3.462339 3.712126 1.754612786 0 1.326435 6.652156  
7.050495 0.09831006 0.8039786 1.032505 1.98490116 0.8845044 1.725674  
1.200459983 1.336495 2.023349 1.783123 0.1222902 11.60347 1.805638779  
2.357965538 0.783221248 0 0.6889018 2.240021 0.1286212 0.4820981  
0.4013841 2.839731365 0.4558381 23.676122988 1.091971 5.602858 0  
1.793279 0.4930698 1.308780007 3.336604 0.4451257 7.530482 0.3480215  
6.900954 3.788089 4.121947 2.604237363 1.116296 0.484417843 1.633519 0.1446573  
0.360007284 13.55593 1.129183 7.33456 3.530167375 2.745891 4.6048 0.8732806  
8.402963987 0.7099672 0.9665564 0 4.564147 1.458415 3.588954 0.3798089  
RAB11B-AS1 5.948699 2.498403104 1.412848 2.170365891 4.241350524 1.445964711  
3.898159 1.601304898 2.237122 1.471478 1.371330635 1.180039 1.520068 1.24538  
1.08937 2.662967 2.958245 1.261907268 1.57982 1.188916 1.382849543 3.12059  
4.770737494 2.185921 2.63798 2.493603475 1.483501 0.8139751 2.687543  
1.318461 1.443002 2.129164279 2.577055 1.486053123 1.774284 1.556815156  
3.191802847 1.823761819 1.273361 2.817753 1.600222015 1.931615 1.985251181  
3.684603 2.336657093 2.279271 4.690528 3.191754 1.592757428 0.9693281  
1.831409 2.11101 2.19103431 2.280212 1.879747208 1.756439 2.327102 2.362785  
1.405274 2.888038 0.9791765 2.697922 2.253108982 1.420458 1.271567 3.229591  
0.7448211 1.786232 1.721811 1.286383 1.561929 2.51415347 1.448365 1.009851  
2.066185571 1.217682 1.180391884 3.692967 2.012121 8.405367 1.140544 1.566004  
1.591214 1.41714024 2.357764442 2.123566 2.907942 2.332922 2.221790484  
2.217848 2.20364 2.292425 3.33330038 1.490059 2.011852 2.100641217 1.745138  
5.27996341 1.742005499 2.377275 1.805439658 1.187054 3.684403 4.414463723  
1.911939 1.586788 0.948105243 2.499348 2.470851101 1.730794888 1.170827  
1.823966809 1.404128 2.287137 3.576441 2.56815 1.682987 1.151742595 3.862388  
2.975347 1.977816 2.017367 1.205897 1.232011 2.471699 5.029131 0.9699651  
2.303735 3.254134 3.27340604 1.875932535 1.681733 4.635166244 2.892747352  
1.673776 2.090919461 1.947816 1.582866 0.609103404 3.555969195 1.357739411  
1.544112793 1.878621 1.630874 1.487662 3.25814 3.601225 2.403658 2.607782535  
1.93686 1.772114 1.389846371 1.896733 1.890151 1.606159533 2.788338 1.242008  
2.744932876 2.104337 4.043735 1.837386397 1.945277 2.418126 1.776086 2.19874647  
1.284947 2.808613 2.087413598 1.21922 1.680863437 3.78379 1.601859 2.453145753  
1.802083 2.434590187 4.568627 2.601252 1.828232 2.976877 2.61557 2.226434096  
0.9233089 2.655538 3.029513 1.874642 3.101436 1.580447 1.798806 2.578048  
1.920640718 2.498788081 4.075394 1.875052 3.308978 2.247262 2.195690157  
1.895682 3.177734208 2.622201 3.669548 1.821962428 2.136982063 2.018401  
1.825024 2.039725723 4.758628 2.113896 1.322392 1.431212 1.77678 1.600011  
1.740916 2.575192 0.9410984 1.869107 3.355008 2.244281 1.832946 1.226028885  
0.8407476 2.230728 1.803888979 2.551658 2.561512 2.120495 2.638075 2.287548  
2.308479178 3.595727 1.673624 2.607166 6.101281 1.950724 2.664916631 2.067321  
7.596737 1.756318 1.695846522 2.069405002 1.244132 1.304658 2.436421 1.666605963  
1.243864 1.992193 2.199975469 2.739727 2.467649 1.729577 0.7344486 1.624145  
2.245863 1.761185459 1.572206 1.283971305 1.709528 3.166827 1.729328 1.597351  
5.039816 1.344083 2.970323 2.308631622 2.122425 2.657708 2.038737755 1.676588

2.564339 2.024582 1.247562 2.101519 2.364861 1.780171 2.17558 3.178207042  
3.410242 1.473785603 1.16422 1.47758 2.934878 1.317643648 2.828799523  
2.654124 1.591923 1.734076 7.76792 2.176335 1.492665407 2.387223 1.903097  
1.408683 3.460167349 2.404395 2.302318 2.610458309 2.131223 2.22964704  
1.917296 1.950264 2.401326267 1.782745 1.832015 7.20514327 1.949814955  
2.266271 3.496631 1.503156 1.519635 2.543931 2.31124 2.275355 0.7490083  
2.813716 2.509920071 1.202598 1.51163743 5.550915 2.05022815 2.402196  
1.957795 2.334761535 2.296204 1.462266 1.004463 2.972660417 1.106961 1.19473  
1.964549499 1.546550388 1.816559 3.210757 1.93012 2.964951953 1.567239191  
2.699764903 1.957041 2.316123 0.2233114 1.808528 1.555565 1.734277 2.384603  
1.253874 1.577932 1.579866 1.907223 1.233023865 1.893488 3.118548 2.13039  
1.212515 2.207855 2.102804 1.587069 1.495017 1.592563 2.219913 1.723354348  
2.103568 2.145787 1.911878 1.185995 3.374140997 6.124362 2.751613 2.44824  
1.132643 1.844271 1.533741 1.243229 1.31685491 1.318536 1.817474 1.506780097  
1.97208 2.17193 1.86796 1.130468 1.829799 2.190774321 2.23957861 1.103857  
1.212653 3.354909 1.108027585 2.445387381 1.806797101 2.122796 2.158902  
2.598378 5.257613 2.250755 1.859487 1.625751 1.631163276 5.078026393 2.016603  
2.827485789 2.416008 1.650741507 1.700695 1.831557 1.792911 2.31709 1.856264  
2.024342 2.022707 2.330972 1.275776 1.968181309 2.174802 0.3447533 1.4634  
1.930382 2.027634197 1.485803 1.814436 1.911626 2.465678176 2.146297 1.939819  
2.767008 2.960591 1.926078 1.741689 4.682833 4.238748622 3.128299888 2.154980475  
2.046973 2.040797983 1.448415143 1.672843 0.423457 2.51187722 2.302365  
1.837058 2.051802 2.170184228 1.768295 2.152077 1.816617 3.783302118 2.250852  
3.262494 1.752187 1.866463 0.9063031 2.078321 1.341076 1.595547 2.590574  
1.387948 1.472099 1.183122657 1.304879 0.6099256 1.818223 1.710866 1.291623  
1.364802 1.929137 0.978247241 1.155490281 1.626784674 1.394925 2.41796  
1.651848 4.045655 1.870766 1.783559785 1.626917 2.193448 1.088128 1.813929  
1.984215 1.098018837 1.629701 4.163278 2.019883 2.278994 3.27961 1.478018  
2.407392 1.121400474 1.507075 2.209878 2.466248553 1.088394 2.137054 1.798934  
1.623061 1.701525 1.867190209 1.659111499 2.486388699 3.329482 1.896969  
1.517749 1.095765 1.848217 1.751754 1.808596651 2.023472 6.056033386 0.8976435  
3.734862 4.449994 1.381556 0.6411472 1.866143673 3.436719 2.12561 1.69821  
1.859197 7.85701 2.397915 1.454728 2.208737237 2.170484 0.814521784 1.253775  
5.156543 1.259091219 4.149438 2.670115 2.898174 1.345443693 2.193805 1.825651  
1.409638 1.680621491 1.36249 1.511446 5.399243 1.793558 2.68112 2.374707  
1.487293

AC022150.2 2.50383 1.354442968 1.090526 3.441355524 2.968510332 2.068000431  
2.270122 2.092759103 0.7436486 1.232629 0.910784999 1.248627 2.442509  
3.155994 2.3221 4.129296 1.587568 1.969706727 0.7822966 1.285957 2.223689347  
1.702675 4.995446144 2.541549 1.792632 1.820784683 2.516155 1.619069 1.318094  
2.480735 0.9779452 2.215250678 2.64919 2.50873106 2.189615 2.490364854  
3.151161879 3.016947605 2.946042 3.346424 2.484895677 3.397962 0.916351077  
2.218481 1.473023517 3.660692 3.946708 0.4910826 1.235109189 0.7879128  
3.458212 3.789329 2.582849012 1.839996 1.192606804 5.123403 1.665915 3.362903

1.299475 2.073647 1.719442 2.669475 3.651740343 0.9561624 1.279205 2.096865  
1.037654 2.117008 2.551058 0.7595718 1.698022 4.115287689 1.163747 0.7429154  
2.002333248 1.930504 0.524850297 2.748018 1.417297 1.12224 0.9147562 1.91306  
2.760269 0.464997662 3.606621903 0.9847323 1.095523 4.23394 1.362422736  
1.295626 1.0846 1.490628 3.611113414 1.582987 2.083463 1.364403896 0.863057  
2.332971888 1.11858516 1.098198 1.674423798 1.316081 1.249577 0.920218004  
4.295986 0.7539706 1.573434705 2.997644 3.414188686 1.4646487 0.8873724  
3.249084112 2.136906 4.233779 2.382199 1.90003 2.652597 3.962542975 1.959356  
4.086281 1.290997 1.245521 1.060665 1.839471 1.74219 2.172581 1.866981 3.637311  
4.459465 2.482760071 2.738290437 1.150005 4.055256359 2.738370952 1.704034  
3.178440943 2.636622 1.682708 0.084104579 3.985013761 0.748426708 1.65331288  
1.824296 1.463735 2.892933 1.843152 3.916138 1.429225 3.065466789 1.960032  
4.315308 2.350190304 3.439795 2.436875 0.945658848 2.019623 2.20521 1.174516454  
2.1933 1.076639 1.759021677 2.295999 2.008343 1.917187 2.318755692 2.127124  
2.767371 1.694490629 0.8500935 1.980038859 2.161097 0.8945647 1.121381275  
1.582985 4.029230137 2.609354 6.253942 0.6467648 1.289831 0.7029991  
2.555596765 1.63187 0.9745403 4.836877 2.55743 1.69596 0.6825747  
2.964729 2.892297 2.348371849 0.860214122 2.786842 1.434593 2.168469 0.9924689  
3.210743647 1.629004 3.187602948 2.567418 1.976086 1.117550661 2.946453709  
1.067267 0.5319958 1.960419128 1.35825 1.425962 3.625815 2.366781 2.42085  
2.372578 0.8582743 0.7892158 0.7508004 3.503562 5.531392 0.9277881  
1.467933 2.532057117 1.832561 2.060427 1.529072904 1.00922 2.333056 2.779242  
1.536661 2.010337 3.035261522 2.853251 1.201683 2.451399 0.235889 1.584939  
0.740005675 1.009106 1.133217 1.165108 3.237373184 1.083438489 3.734296  
1.660621 1.06733 3.047527396 1.688894 3.02745 2.403753915 2.62853 3.986556  
0.5300612 2.548826 2.412737 1.773814 2.681529879 2.472748 0.602785573  
1.362024 3.811234 2.929805 0.8192269 1.953731 1.589299 1.74496 1.293650064  
3.165511 3.15279 0.867981479 1.768959 0.5802187 2.503552 1.941869 1.403644  
2.009083 2.788766 5.276714 3.027782863 0.5721019 2.323431162 2.13 3.641296  
2.341421 3.290728722 2.684433048 1.614995 1.526192 3.032907 0.07224693  
2.146212 1.187067426 1.534417 2.135073 1.055641 2.672658529 1.839964 0.4379055  
2.217412928 0.8360608 1.128849807 1.26121 3.525791 2.348454916 1.901498  
2.112627 0 2.624983798 0.8514476 1.441613 2.800032 2.201953 2.260833  
3.008448 3.024144 2.096498 0.777032 1.83452781 0.7385031 1.356718066  
1.886687 1.672828728 2.57114 1.26832 1.517810562 1.468376 0.9974289  
1.126901 0.631481392 1.036711 1.291915 0.85840666 2.237458548 0.4903427  
1.851781 1.95963 2.140136209 2.234045927 3.825917246 1.511386 0.9170984  
0.2805957 0.9300393 2.418064 1.508794 1.465116 1.113005 3.175763 0.9925679  
1.303148 1.891379239 2.140029 2.420709 2.330043 1.751209 2.311848 1.434348  
0.9235243 1.540154 2.035741 1.571475 3.226813997 3.086129 0.9152682  
1.926281 2.677753 2.620682254 0.8718919 3.998426 3.017537 1.402158 3.997151  
2.013851 1.673726 1.402691811 0.8802195 1.456805 1.23704114 1.351615  
2.661005 2.89451 1.21287 2.532663 2.083061138 0.944484416 1.58015 2.737429  
1.880939 0.994471963 3.143864236 1.140485946 1.539335 2.900222 2.058488



1.926606 3.591267 0.9461586 1.285111 5.011365341 2.950335315 2.322178  
2.521751945 4.403529 1.481566135 2.858532 2.677612 1.543035 2.643261 2.744975  
2.034208 2.220287 0.7383824 1.472179 2.027100493 2.040643 0.4420307  
0.7053575 1.525914 4.174911405 1.276957 1.187436 2.651559 2.037698553 1.71719  
2.254394 1.151737 0.8154299 2.358338 2.000215 0.918284 2.331693917 3.394194584  
3.080278625 0.7838677 1.692886676 1.353035289 2.573834 0.4705495  
2.523328025 3.542415 1.064408 0.7860163 2.748022293 0.9711932 1.17271  
1.43787 1.584600452 1.131298 1.521111 1.949156 1.528234 2.33283 2.436344  
1.246624 1.002419 4.187864 1.123577 2.546024 0.70791397 3.020333 3.284506  
2.398375 2.038065 1.796318 2.320922 1.084752 0.801644951 1.24919852 1.391837192  
0.7011012 2.36113 1.678781 1.826657 3.877565 2.657886585 2.723803 3.937308  
1.29623 0.8360151 0.8255658 1.013119487 2.317788 2.722385 2.197995  
2.185183 2.658646 3.753149 3.855968 1.501723616 0.8542884 2.333411 1.660122279  
0.9594069 1.809471 3.385707 4.035514 1.130328 2.833927634 2.948959051  
1.323814175 0.4020083 3.346409 0.9615551 1.614955 2.41545 1.421465  
2.462852326 1.706031 0.386985269 0.02929633 2.104455 1.649319 3.090078  
0.6349678 2.812556042 1.841498 2.310817 1.310251 3.60142 0.7465031  
2.331513 2.953746 2.856326662 2.964946 0.896749698 0.5336392 0.1047867  
1.477762819 4.451565 2.267318 1.512729 3.287801181 1.968974 3.540439 3.136572  
0.881002977 2.514283 0.7293261 0.2738989 1.287797 2.465038 3.091609  
1.161641  
LINC01011 0.1518426 1.910086345 0.8366717 1.651207576 2.344295107  
0.976564517 2.478051 0.953125554 1.510613 1.10941 1.071501461 1.675497  
2.021541 1.072507 1.53998 2.82264 1.279262 1.528642373 1.192961 0.8587646  
1.255846463 0.994994 2.896175718 1.940896 0.821384 1.164520596 1.104865  
2.632688 1.389086 1.600488 0.2361579 0.680403185 1.10181 1.869756969  
1.864051 1.990365818 2.701772354 1.808839542 1.216052 2.592618 1.556406186  
1.927647 0.629807998 0.4940038 1.607270637 5.391415 2.970912 1.712607  
1.226175042 1.000331 1.286226 3.666658 1.055701214 1.324849 1.725989748  
2.227156 0.9570009 3.346244 0.4815893 0.8483437 0.4464474 2.462543  
4.012146858 1.051473 1.30443 1.78734 0.731466 2.481538 1.477977 0.9466572  
1.203238 1.208225799 0.8508972 0.7556964 1.277158484 1.454767 1.389476798  
1.888712 2.14199 0.5903897 1.427076 2.084075 1.374734 0.97757811 2.428242465  
0.8732986 1.456694 3.25452 1.339325747 0.9984213 0.8964837 0.6252869  
1.364752889 0.9837734 2.402517 0.784303891 0.7396429 2.037719398  
0.914410177 1.301116 0.835280781 0.6963542 1.277778 1.382054756 1.825463  
1.298709 0.706234452 1.802169 2.361191903 0.767699935 0.7917883 2.39914583  
1.958261 2.545406 1.165525 2.176484 0.8609224 1.602496924 3.867347 1.552066  
1.326023 1.743798 0.6298118 3.011515 1.186763 0.2145423 0.5863202  
2.336238 4.230549 2.066640886 1.161430907 1.103265 1.617844273 2.959248527  
1.350969 2.114822691 2.133873 0.5687829 1.111141866 2.577312539 0.483617911  
0.974785829 0.4812712 1.5842 1.192987 1.502293 2.943511 1.149113 1.504247104  
1.047768 1.508378 2.161997576 3.313055 0.9791513 0.792623445 3.505422  
1.132566 1.187897163 1.879666 2.188094 0.760647029 1.610916 1.313543 1.515088

2.175769531 2.601018 1.820409 1.120881511 3.38959 1.620095829 1.729661  
0.8563762 1.622909225 1.398087 2.272237492 2.382672 4.124077 1.596984  
1.350858 0.8513016 1.78137573 0.7944555 0.4756561 3.505942 1.457059  
0.1013594 1.16306 4.075315 3.313126 1.614035721 0.408226837 2.334389 1.30202  
2.635179 1.650299 1.56806543 1.80797 2.101155691 2.687245 1.725999 0.722910541  
0.948866354 1.132472 0.6222306 1.122829881 1.251615 1.522697 0.7709133  
1.177148 1.047609 1.350312 1.371373 1.196785 0.9675469 1.482891 4.469089  
1.336867 0.9393303 1.713175381 1.87693 0.6412671 0.80365361 1.926769  
0.542306 1.96554 2.076371 1.254313 2.061947848 1.85315 1.538761 3.449923  
0.06948278 1.055551 1.029321305 1.498981 1.791378 1.261357 2.291465535  
1.772969423 2.239468 0.6535907 1.306123 1.024863733 1.003383 1.792159  
1.084541711 3.923988 2.530234 0.9252343 1.731672 1.3128 1.544246 1.629613439  
1.576366 0.714861029 1.041385 5.512707 1.278511 0.4222909 1.58606 0.5659034  
1.24373 1.024754872 2.554309 3.402432 1.101761562 2.100028 0.9216346  
1.831703 1.869222 1.668169 0.8166274 0.9650147 1.704169 2.570211169 3.04079  
0.895947123 2.034797 2.183393 1.462382 2.191038828 1.452297459 0.8509892  
1.495314 2.054041 0.3310354 0.6408637 0.979045578 1.479018 2.878969  
1.079877 2.406103757 0.9991954 0.2821616 0.88661987 0.6268631  
1.034477803 0.5289128 3.460186 1.614092813 2.603174 1.054761 1.48152715  
1.703920468 0.8994738 1.229634 1.737847 1.53599 1.230789 2.845875 2.189984  
1.096354 1.194204 1.810956545 1.05419 0.910270463 0.1958587 1.397370238  
2.785707 1.610253 1.863211853 1.18627 0.8539092 1.276113 0.954837606 1.08859  
0.7458635 1.254377858 2.420619015 0.2302919 1.525368 1.440235 2.483782563  
2.426405179 4.148849523 0.9171168 1.365697 0.1836699 0.5145889  
2.156558 1.592682 1.158349 1.308946 0.9635349 0.4501538 0.7792692  
1.115555423 0.9565278 2.547622 1.947805 1.69078 2.239639 0.9339414  
0.8427314 1.133394 1.285048 1.189368 1.790116122 0.8318025 1.33676 1.57756  
0.9487878 2.921937961 2.344896 1.872492 2.148188 0.5246827 2.455101  
1.518444 0.8947181 1.713902102 0.4346856 2.002524 0.523580726 1.054302  
2.722097 2.573741 1.448123 1.894823 1.387086835 1.797629645 1.298647 2.553915  
0.4490291 0.832770693 1.936545921 2.784321368 1.086891 2.142249 1.271528  
2.20053 1.483905 1.077803 1.472094 2.889609114 1.382108583 1.204848 2.479133952  
2.522121 0.627425202 1.767566 2.942963 2.722021 1.852335 1.464949 0.7568121  
2.040655 0.9908141 0.7045326 2.103107747 3.943355 1.721577 0.7466913  
0.8375517 1.553245216 1.266486 1.298027 1.500813 1.827188671 1.40719  
0.782393 0.8575543 1.378566 1.138292 1.382449 2.136154 2.59363785 3.28768874  
2.855589764 0.8642483 1.163520832 1.16090675 3.689187 1.384852 1.203573505  
1.370409 1.023238 2.10432 3.175532534 1.313295 0.5294338 0.7705979  
1.05205165 0.9848852 1.81213 0.9996668 1.521668 2.447225 2.189058  
1.368917 0.5202372 2.342528 0.6994876 1.025183 0.768867866 0.1788735  
0.8172098 1.688055 1.247254 0.5885928 1.319461 1.443308 1.893414459  
1.079967308 1.162937105 1.474283 1.439841 2.07289 2.776305 2.257004 1.480786915  
1.228747 2.61015 0.4393475 0.7157213 1.005129 0.776498863 1.242449  
2.109568 1.119023 1.693976 0.3861232 2.134791 3.34322 1.061414891 1.989794

0.9087935 1.141001865 0.8352404 1.807437 1.717224 3.32382 1.669453  
1.417118918 2.628844758 0.450596016 0.5648805 1.977182 1.02803 0.6688212  
2.046838 0.8289465 1.032301593 4.173286 1.450772367 1.993401 1.370628  
0.2074519 1.312163 0.5091488 1.129433846 1.160189 1.717499 1.941971  
1.122116 0.9894951 2.457088 1.201393 1.83129945 0.9711862 0.468951283  
1.105626 0.9202538 0.970857424 3.939434 1.499151 1.158038 1.273990288  
1.031067 3.029948 1.902146 1.498492391 1.534314 1.744405 0.1689429 0.4822676  
1.331173 1.454136 0.7703819  
AC092611.2 5.824183 2.422947977 1.128234 1.650620375 0.147965995 1.609308606  
1.301279 0.747793123 3.150722 0.5595487 0.782199777 0.2361712 3.589354  
2.284289 1.812332 0.4754124 0.6958215 1.147483754 2.382273 0.8694249  
2.464906566 0.1568254 0.647905609 2.408663 0.5015632 0.723222863  
2.220949 0.8365534 0.6701466 0.6644559 4.815302 1.392379221 1.16559  
0.40363661 3.05721 2.617684632 0.303431257 1.586459477 1.506438 1.082311  
2.12493976 2.252534 1.294144943 4.348299 0.687564278 3.649359 0.1592531  
0.1155911 1.502054084 2.086414 1.220992 0.2492979 1.305713593 0.1590974  
1.663755384 2.782955 1.790891 0.5848096 0.4857946 0.8628828 1.457001  
1.000898 0.415909872 1.282851 1.009569 0.9145384 2.325006 1.567473 2.702107  
1.802184 3.931742 0.805857419 1.626053 0.6924753 1.446063037 2.805277  
1.400112343 2.45114 3.680399 0.352204 4.890736 2.729346 2.135576 1.506563633  
1.091477681 0.7402211 0.1365165 1.470372 0.734665274 1.946229 1.396605  
2.757496 0.781737383 2.621074 1.275055 0.157657197 3.724352 0.308888548  
2.2619237 2.127036 0.45769479 1.062101 0.2582567 0.758103575 2.237046  
0.946505 1.49653752 1.19334 2.906594721 0.752180034 1.978767 0.37061921  
0.8705514 0.1630714 0.08553389 0.8578005 1.248737 1.094913191  
0.1596439 1.214942 1.002787 2.003334 1.880088 1.882711 0.1968369 7.22107  
1.333164 1.788743 0.5322267 0.52595312 1.724577654 1.268852 0.074058107  
1.039805951 3.039883 3.939682888 0.7285404 2.454373 0.296948185 0.522951852  
0.813068151 0.618072849 5.679829 1.71079 3.771354 0.4505275 0.5113991  
2.742068 1.228585018 1.828934 1.932804 0.306381084 0.5948517 1.310437  
0.92836021 0.6975671 1.848091 0.364115178 1.89295 1.177174 1.21106328  
3.242595 0.5489697 1.232113 3.135383536 3.257453 0.3482648 0.960609124  
1.76254 2.729790415 0.2972801 0.8121706 1.274689498 1.263611 0.853560595  
0.5527711 0.5818591 0.7611778 1.073445 0.3191246 0.115187872  
1.944556 0.4936816 0.5789006 2.851429 7.732241 0.6778034 2.114242  
2.116636 1.58771501 3.644591412 0.1844907 1.519536 0.8654853 0.6103936  
2.932472452 0.2300611 0.631830193 1.493024 0.2616364 0.417784032  
2.237637015 0.2974897 0.3558919 1.771129433 0.2557641 1.075195  
0.6078491 3.171146 1.42455 2.962766 0.6060621 2.706872 0.3578651  
1.132172 0.2080086 1.293057 2.841623 2.757177296 2.603315 0.9882686  
0.254056489 0.2740965 6.060746 2.367841 1.395127 2.808956 0.50321441  
0.8215672 1.863795 1.281413 0.1427749 2.030158 0.335923629 0.1379169  
0.2400631 1.742251 1.177139916 1.475472152 3.218614 1.307935 0.6066245  
2.309925702 1.455372 0.4734735 1.091177764 1.377115 1.50137 2.031901

0.4189256 2.768563 1.434752 1.913468412 1.30958 1.276953648 2.641998  
0.6842202 1.25609 2.20549 0.2699234 2.231015 0.4791837 0.046449077  
2.077044 0.4394037 0.646047381 1.070686 1.843721 1.653804 2.952572 0.1858443  
2.265335 0.5538545 1.08336 0.675170417 1.211953 1.851843649 1.617595 4.09498  
2.775303 1.688325149 0.274060698 18.64576 0.481528 2.423455 0 0.6130222  
1.00588345 2.933415 7.753687 2.548334 0.239231666 2.213575 1.275544 0.709043657  
0.375694 2.463845234 0.3169901 0.9005309 1.826271819 2.603576 2.406601 0  
2.281362437 1.503104 1.033642 2.534431 2.088655 1.090655 0.7709468 2.209107  
1.013767 0.0685867 0.800121069 1.56446 1.796312571 2.185748 2.344330624  
4.709176 1.119515 0.431914278 0.982307 0.7228596 0.5456575 0.133774348  
0.8540742 0.4926274 0.393181998 2.896592902 5.141824 0.7933858  
3.387478 0.059654074 1.752833305 0.472786046 1.644142 2.007561 0.8491711  
0.4089125 2.62222 3.155801 1.095435 1.152709 1.363703 0.4720295 2.433086  
1.022996834 1.600053 0.2136701 2.637563 1.483919 4.617613 2.238933 2.18853  
0.5932172 5.138365 0.475578 3.276640833 1.461373 0.5655193 1.969981  
2.572053 0.06168565 0 0.3736919 3.046049 0.7920962 1.142873 1.998087  
1.71564 1.320663051 1.988987 2.173329 1.865493351 0.8180829 2.097537  
0.7892404 1.383507 3.017951 1.81460958 0.051302966 0.8501392 3.982464  
2.913126 1.089677764 1.130948182 0.30200368 0.6415001 2.595264 2.207972 0  
2.241589 2.004362 1.191053 2.385658841 0.18656873 0.9404642 1.487682443  
6.36036 1.426627678 2.057719 0.5026098 2.334856 1.893962 1.008384 4.603962  
0.7193591 0.5214016 2.079131 0.79750401 1.2217 3.183784 0.6183079  
1.010165 2.116565521 2.842102 1.724908 1.835659 0.464161668 0.5130133  
1.087549 1.372423 2.084822 2.473724 1.780377 0 0.909909642 0.528700975  
1.289890238 1.297314 0.82307303 1.348846325 1.817488 2.76043 0.569599391  
2.205219 1.591668 0.5233214 0.639721789 0.9032471 1.899754 1.523007  
0.27402865 1.095573 1.020412 0.5630637 0.9961361 2.015782 2.258026  
2.048954 1.083442 0.4608654 1.500567 1.75699 1.666288732 9.749847 0.3740843  
4.033186 1.951738 0.752222 1.729946 1.104789 2.142993849 1.697644662 1.792223794  
2.864367 1.691808 1.662716 0.2831436 3.890991 0.959748221 3.509686 3.194378  
1.429405 1.304971 0.2498423 1.990125386 0.6197151 0.6219484 3.104186  
1.34568 3.369222 0.8681853 0.4225119 1.556798026 0.7540594 0.7061639  
0.669873902 1.884615 1.686618 1.616889 2.377016 3.005874 2.944000481 1.29890966  
0.16025119 0.2838743 2.114294 2.334038 1.886021 1.911146 1.003754 1.719356685  
0.7577933 0.298108269 0.2482478 1.018999 5.754744 2.793553 0 1.071133111  
0.9752669 1.081516 1.92597 1.322416 0.1129577 0 2.176444 0.812807803  
0.7267276 2.188777223 0.4915098 0.2959764 2.255818669 0.6779946  
0.3039959 1.641379 1.332798546 1.574809 2.4174 3.908577 0.622111751  
2.517892 1.977625 1.829966 1.836219 1.181164 1.29002 2.417672  
AL359915.2 0.9551087 1.767305884 0.3887273 1.324445056 1.177659782  
0.823543824 1.376087 1.091041784 0.6663702 0.622859 0.920041842 1.133068  
1.541111 1.572161 1.49575 1.42091 1.255417 1.120554689 0.9252533 0.9484404  
0.878015785 0.8903041 1.538588005 0.657155 0.7896138 1.118128028  
1.283092 0.7077162 0.3947428 0.7261881 1.386778 0.918471396 1.674699

1.235592111 1.188158 1.719179478 1.317276085 0.98893761 1.006131 1.617403  
1.056351332 1.049291 0.702278581 1.327413 1.03029095 2.190723 1.325107  
0.7141167 0.933086408 0.9483468 1.336489 1.193271 1.751060031 0.9341946  
0.805963659 1.618618 0.9996929 1.503168 0.878735 1.065297 0.3829378 1.84391  
0.976862791 1.390421 0.5973866 1.30524 0.6211367 1.194721 2.39181  
0.8740833 1.378164 1.272160788 1.147328 0.8724345 1.199210387 1.508669  
0.325457437 2.910374 1.617165 0.7105984 1.263442 0.6996973 1.429154  
1.209392546 1.497020704 0.5131109 0.3849721 1.876792 1.004712504  
1.141545 0.6694914 0.4455717 1.215154474 1.349407 1.514853 0.672732283  
2.11433 1.014321675 0.87225514 0.9470801 0.63366679 0.7019743  
1.142722 0.500299979 1.796875 0.8132457 0.673917632 1.093525 2.246012887  
0.884383043 0.6470299 1.470456967 0.9270581 1.074006 1.475781 0.7638854  
0.9179964 1.425993129 1.186193 1.132641 1.293833 1.446782 0.6329478  
0.9747586 1.166751 1.37796 1.05117 1.567378 1.481114 2.317454857 1.601209012  
1.183605 0.952152421 0.986882836 1.32974 1.367459852 0.8650361 1.089577  
0.277659057 1.708942204 0.511360621 0.920206593 0.9907384 0.9819343  
1.534918 0.844196 1.685647 1.367185 1.267466325 1.050949 1.6456 2.029227774  
1.593314 1.489649 0.796805688 1.294156 1.02574 0.756584498 1.20681 1.474161  
0.992919752 2.007773 1.67284 0.9372056 1.119752499 1.426234 0.9142536  
0.557160327 0.7805201 0.82636554 1.962332 1.209186 1.157705411 0.6086174  
1.311919965 1.630584 1.350192 0.6891386 0.9341948 0.6956628 0.846257586  
0.3096542 0.7218949 2.055638 1.543384 0.6216245 0.5055108 1.28402  
1.444676 1.378538935 0.489008577 1.037093 0.9628337 1.230202 0.6643578  
1.808948587 0.4097464 1.204433536 1.109947 1.393095 0.76927742 1.212633754  
0.8344962 0.742799 1.176116354 0.8861368 1.057216 1.393231 1.030363  
1.121339 1.054179 0.7213408 0.8330451 0.5820421 1.281277 2.296143 1.14573  
1.48011 1.353211346 1.166773 1.393443 0.653979171 0.4851237 1.343275  
1.752419 1.175827 0.7438702 1.487511542 1.567755 1.272636 1.486458 0.2026348  
1.899152 0.822650029 1.646518 1.509822 0.9777702 1.390086931 0.711713163  
1.573404 0.9187371 0.6875387 1.394426602 0.9247729 1.269699 1.08449953  
1.60291 1.0306 0.6071151 0.5803157 1.487568 0.6008092 1.567523693  
1.102822 0.857041714 1.073826 1.576588 1.357087 0.8069405 1.532366 0.7924445  
0.8534417 0.532557119 1.489622 1.442905 0.583613542 1.088898 0.903025  
1.323561 0.9176747 0.8102475 2.739426 0.8734041 1.6472 0.924422271  
0.5092775 0.659096311 1.326771 1.77827 1.041822 1.212484722 0.903768087  
4.503359 1.240482 1.493122 1.490705 1.356236 1.191674864 1.151686 8.026812  
0.9320474 1.260484872 0.9963256 1.242382 0.828732096 0.6362645  
1.714136193 0.5217228 1.341476 1.240773672 0.8174994 1.090358 1.14369447  
1.194352964 0.8979361 0.9021706 1.674706 0.8912411 1.316988 0.9439934  
1.569698 0.9323313 0.7405656 1.192836243 0.864038 0.871235558 0.9002306  
1.18948333 1.591546 0.9595604 0.980263888 0.9324703 0.6963299  
0.4669358 0.532354306 0.804707 0.6184349 0.358341264 1.12851514  
1.173627 0.7138826 1.783715 0.876528257 1.151183382 1.266830172 1.102918  
1.131771 1.176837 0.6765616 0.8756737 1.263281 0.840016 0.5249177 1.5433

0.9625058 0.9036607 1.105530815 0.952389 0.9870603 1.447024 0.6695761  
7.671172 2.21633 0.9984533 0.7373762 1.580591 1.141492 1.352045132  
1.241445 1.088145 1.010289 1.11189 1.163873362 0.6212749 1.5599 1.511486  
0.7990571 1.159422 0.9137094 0.7660248 1.2893914 0.9132882  
0.9894655 0.833098215 0.758871 1.714665 0.7873064 0.8965258 1.642382  
1.205068444 0.414030527 1.088278 1.46991 0.7995014 0.788430341 0.839273154  
0.62612407 0.7081322 1.273477 1.34257 0.8855852 1.723966 1.475036  
0.8554662 1.573434165 1.137037692 0.9502389 1.569442828 9.322007  
0.783435036 1.387413 1.186892 1.361894 1.787434 1.116865 1.27097 1.746254  
0.630144 0.6711686 1.14723051 1.971899 0.7678698 0.4100922 1.206921  
1.649231574 1.120626 1.024039 1.260751 0.831853851 0.6541214 1.157965  
0.6662498 0.9713828 1.579279 0.8343455 0.8037022 1.399919568  
1.609605049 1.444281434 0.7855899 0.850757079 0.538023897 0.6886417  
1.4809 1.143723105 1.216373 0.5536744 0.9532354 1.819424049 1.228878  
0.8255474 0.7840892 0.812152285 0.8955936 1.168747 0.8174149  
0.4851194 1.226884 0.5386095 0.9782027 0.9407023 1.741028 0.587502  
0.957425 1.270552785 1.642485 1.057682 1.055329 1.435212 1.187042 0.8006782  
0.664087 0.380323926 0.650287821 0.833397507 0.8945394 0.8515467  
1.079659 1.129395 1.802495 1.591825537 1.208457 1.563897 0.6741389 0.6692439  
0.645217 0.566855883 0.4085934 1.746532 0.9258727 1.345147 0.5317779  
2.1134 0.8818447 0.557555417 0.8589632 1.186955 0.714597572 1.25254  
1.591566 1.580622 1.378687 1.100202 1.423289726 1.287517504 0.472714604  
0.7931433 1.658999 1.129003 0.8837077 1.049967 0.9395678 1.098839101  
0.752692 0.219842568 0.5803054 1.634093 0.9151238 1.090691 1.057485  
1.080546218 1.080186 1.378131 0.8985401 1.019106 0.4558015 0.8416117  
1.034694 0.98268427 1.447449 0.402240344 0.7933267 0.7165857 1.142785847  
2.212662 1.052398 1.539979 1.076805383 0.8764958 1.428257 1.727895 0.714534931  
1.080687 0.5021908 0.3130053 1.059949 1.269827 1.074223 0.5454527  
AL117379.1 0.6771734 1.488842479 0.2171237 0.772077477 1.594623188  
0.622276559 0.5589206 0.335788935 0.04715999 0.1954242 0.585398159  
0.9968728 0.4395717 1.150827 0.8138093 1.750529 0.9373548 0.257632985  
0.4185922 0.4684877 0.196771796 0.8450502 1.309209561 2.502493  
1.383506 0.757763788 0.6382685 0.3756458 0.5015376 1.301966 0.3268537  
0.578920186 0.6978619 2.084362758 0.4497134 0.958439604 1.589615253  
1.139813722 0.8214045 2.187003 0.845752847 1.517216 0.387415128 0.6508533  
0.97373039 1.463132 2.467129 4.567641 0.435149799 0.1249177 0.7919512  
6.627128 0.670077117 1.250219 0.525731774 1.874487 0.5676577 2.673774  
0.07271372 0.7044887 0.2544312 3.618016 3.5857943 0.5457329  
0.3101776 1.055994 0.3226972 0.8602707 1.096685 0.2023131 0.4883323  
1.00334497 0.1884291 0.2261448 0.670984641 0.6070754 0.295861779  
1.536338 0.3914162 3.281688 0.2071826 0.4085285 0.8219648 0.13009753  
4.025961146 0.5741261 0.4291093 1.18846 0.989682024 0.2689029  
0.2832206 0.4393704 1.353977726 0.986575 1.343292 1.58107424 0.4256973  
2.982120454 0.33856465 0.1193905 0.436736831 0.387502 0.9857242

1.604831201 1.301313 0.2922002 0.427639565 1.53102 2.276471425 0.781067303  
0.2665636 1.997073675 0.6254597 10.81297 2.342896 0.8592625 0.9579186  
1.147205943 3.297578 0.886531 0.5321626 0.1974681 0.1853198 0.8454123  
3.756474 1.496561 0.7183725 1.3181 3.405622 3.542608905 0.862404617  
0.5013932 5.054766649 0.860105366 0.2346143 1.447424786 1.063217  
0.2886482 0.186678209 1.308317612 0.529395038 0.855746357 0.315522  
0.7922194 1.397128 1.078959 3.265971 0.5386928 1.241288261 0.3329449  
1.21976 0.997435612 2.804678 0.6241014 0.241346229 1.482648 0.5532443  
1.117265283 1.120468 3.667149 0.39740379 0.9327849 1.109292 0.1434398  
1.407912252 1.38959 1.563848 0.385946354 0.3957253 0.269074705 2.13585  
0.3950884 0.546368857 0.8511174 2.211246626 5.177082 3.235827 0.3190126  
0.5915696 0.4776656 0.931031073 0.291061 0.4030595 3.249368 1.952618  
0.9469321 0.2029072 2.150065 1.725824 0.998126305 0.233795271 3.81081  
0.6036017 2.989519 0.5481822 1.042464357 1.274115 2.074680236 1.388742  
1.253175 0.343936436 0.370185149 0.507622 0.5593339 0.850156562 0.861362  
0.4828056 1.141421 0.6350142 0.2924251 1.401671 1.172322 0.1429992  
0.1428406 2.033562 4.078648 0.4412818 0.2166796 0.855402501 1.763743  
1.368297 0.342244487 0.9600261 0.3239901 1.867881 1.879403 0.2644731  
1.958348941 4.137135 0.3674275 1.483941 0.03205582 0.6661851 0.125702589  
0.7431621 2.155958 0.7823403 1.126111116 0.220848614 1.706482 0.3240359  
1.287702 0.718095298 1.06197 1.932805 1.119959621 1.559392 1.629256 0.1680746  
1.651226 0.358614 1.288522 0.912925106 0.5624863 0.26983676 0.3590308  
3.994148 2.753815 0.3734118 1.414074 0.2732222 0.5533009 3.024335752  
1.99859 4.182967 0.223154646 0.7867319 0.05519362 0.7682315 0.4469065  
1.27959 1.140526 0.386871 1.525752 1.243031621 0.2448968 0.50330758  
2.332012 0.8338786 0.5037917 1.46733934 1.661366477 7.834993 1.451798  
1.290689 1.30578 0.4129071 0.387155816 0.3560054 5.164544 0.3035907  
1.897833876 0.4753835 0.078105 1.373052045 0.09640091 0.357941544  
0.4066891 1.902938 0.961460068 0.860288 0.4929327 0 1.408581239  
0.4049721 0.5274394 1.961338 0.4064188 1.320189 2.538696 1.355702  
1.885919 0.7083578 1.385818471 0.1080777 0.391784907 1.233871 0.293776171  
1.044565 0.4021653 0.948184045 1.200759 0.2496868 0.3062775 0.780910224  
0.1369691 0.3932611 0.573801793 1.064197419 0.6530177 0.9500316  
0.462299 1.098269386 0.905155869 3.609096431 0.582857 0.4361975 0.228787  
0.2170031 0.4107494 0.4178571 0.5192213 0.4470287 1.143067  
0.192691 0.2521275 0.574207972 0.4590336 0.8395309 0.4399093  
0.6663389 6.031978 0.9335582 0.4913687 0.2663782 1.174267 0.9342965  
0.989350933 4.144514 0.4716042 0.8003524 0.4588174 3.157722114  
1.298179 4.670504 2.331035 0.3556828 1.539586 0.2424921 0.6676721  
1.383737554 0.2232836 0.4684374 0.239337404 0.7347037 1.11848  
1.853787 0.2440624 0.6587682 0.351859303 0.737186488 0.7396337  
1.694165 1.984718 0.228344095 1.664589414 2.813942706 0.9361921 0.8086291  
0.5205205 1.115553 0.7625476 0.1250054 0.3310853 2.517451515  
3.434848814 0.6172163 1.214597725 6.473726 0.726027754 1.161597 0.9027673

0.3984085 2.884184 0.965983 0.4300114 0.9690628 0.1672358 0.4356859  
1.349803401 3.840146 0.2522905 0.4164674 0.7862476 1.799013699  
0.4459072 0.3872762 1.055084 0.687809432 0.9214538 0.23356 0.273899  
0.240729 0.6098515 0.3517625 2.956538 3.093577578 2.516522929 2.248706033  
0.2097165 0.475190507 0.227132173 1.820585 0.1721588 1.219839715  
0.7833171 0.1389738 0.5981619 1.350124804 0.247863 0.3609123  
0.3419454 0.49219917 0.7379338 0.4582057 0.3160476 0.9784794  
0.6423762 1.774401 0.4702539 0.2529845 2.250548 0.7435192 0.7339149  
0.274351035 0.4104441 1.612596 0.423365 0.3983673 0.4172548 0.286195  
0.178594 0.217876914 0.269050644 0.493252234 0.2620068 0.7596893  
0.5599693 1.652856 0.9353751 1.953709033 0.1602701 2.629739 0.2026926  
0.460416 0.7853241 0.192747105 0.9418599 4.468474 0.9650099 1.184357  
1.354849 2.503246 4.616634 0.577487984 0.2483087 1.268383 0.72693357  
0.09956086 0.5508062 1.154229 0.9924716 2.127584 1.477499937 1.472042797  
0.827530515 0 1.079713 0.2477271 0.2363439 1.522579 0.4507255  
0.585700479 0.4973315 0.334656255 0.1114732 0.8579462 1.045949  
0.9548544 0.2265062 1.052147 1.620355 0.741246 0.9157103 0.8678872  
1.141257 2.115502 1.038392 1.25716408 0.5361131 0.426519059 0.1986368 0  
0.785555038 4.206899 0.7917364 0.4913631 1.486546355 0.2293466 1.16901  
1.855399 0.634893153 0.3044015 0.4440163 0.1202529 0.2591397  
0.7257967 1.470455 0.5622019  
AL355488.1 0.1774989 1.768326944 0.6475704 1.379185025 2.351672878  
0.972737646 1.406135 1.019847383 0.2016462 0.1790556 1.485136643  
2.962532 0.4276148 3.892578 2.325308 2.276908 1.52153 0.968059022 0.6352729  
0.8902911 0.62517334 1.862388 4.492145555 2.120883 3.248219 0.968582916  
1.274528 0.5800104 0.5718584 1.849201 0.4121003 0.643588618 1.85113  
4.111711596 1.057022 2.54304706 1.63448304 2.596354253 1.888069 4.44469  
1.983277109 2.554177 0.460140424 0.8620467 1.64733349 2.759611 3.499322  
4.167444 0.506499098 0.4821934 1.900526 11.14196 1.571830458 2.901936  
0.723014685 2.968485 0.8652464 5.636856 0.2245451 1.849184 0.2417543  
2.151263 4.995354837 0.8498327 0.3967427 2.480576 0.6808745 1.959922  
2.776935 0.459986 0.8476948 3.102306864 0.3189163 0.3693202 1.542467239  
1.53941 0.276728087 3.240952 0.3564176 0.704408 0.6496374 0.5557942  
2.787774 0.574811971 6.952193078 0.803925 0.3883135 3.920991 1.763196659  
0.5535941 0.2066375 0.4649198 2.263315852 0.9250849 1.877927  
0.941738988 1.899645 2.866485723 0.304462111 0.3828665 0.41497661  
0.4035983 3.167949 0.831747922 2.510914 1.381897 0.965039953 2.491239  
3.713231086 1.765115813 0.3588164 4.371188854 0.8481105 4.5631  
13.16538 0.9853709 1.737132 2.701759126 4.521115 2.037053 1.006434 0.3908944  
0.513585 2.054928 2.178328 1.278103 2.175723 2.235776 7.664065 5.423161062  
2.341244815 0.8824441 3.017621011 2.31165281 0.3495865 2.345663314  
1.962202 0.2867331 0.620819671 4.175646029 0.433636347 1.884435442  
0.7432574 0.7869632 1.966132 1.962298 3.89724 1.572119 1.778523074  
1.355059 2.652295 2.205943806 4.100511 0.8937445 0.68275193 3.025891



0.6625747 1.216953839 1.8723 2.762435 0.789985893 2.388712 2.788766  
0.4672901 2.71454539 1.320354 2.241278 0.393681213 0.2901805 1.221525727  
5.26384 0.4692541 1.483275052 1.472268 5.182644842 3.798854 7.261601  
0.3518333 1.18144 0.9814854 2.580208336 0.8584854 0.5648914  
4.032236 3.049128 0.7831172 0.1879775 3.303193 2.061677 2.054856049  
0.159667814 4.742642 0.6421015 2.329265 0.8608811 1.833338333 2.617584  
2.367257125 2.019137 3.283827 0.616463549 0.847946658 0.6346447 0.6580046  
0.957631362 0.818445 0.5133632 1.903857 1.147327 1.706204 1.269757 1.432171  
0.3566702 0.6022736 4.072466 7.114819 0.5461871 0.2745115 2.064039634  
5.631686 0.8696763 1.178822108 1.280579 0.8773652 2.266301 3.160516  
0.9181964 2.993939365 3.111001 0.7855212 1.99271 0.0609173 2.082213  
0.394150391 0.662001 7.869802 0.7898206 2.620415812 0.59456063 3.127097  
0.4666473 2.082376 1.187736156 2.483834 2.410411 1.186092909 1.909599  
4.330617 0.1939218 1.817206 0.7042089 1.668867 2.136706393 1.47584  
0.336514844 1.008594 6.999117 3.302284 0.4666479 2.025025 0.3894136  
1.664821 1.927327026 3.703072 5.380645 0.291549587 1.245889 0.2272557  
1.709311 1.199607 1.308344 1.193534 0.682677 4.03929 2.146141698 0.2779411  
0.473032343 2.50642 1.919879 0.7747228 2.991784781 1.841687891 9.652457  
2.406723 2.55496 0.2938549 0.7792193 1.279866942 0.6046534 17.21663  
0.621308 3.359875842 0.2720452 0.204087 1.039930697 0.1144972 0.803889896  
0.4057473 3.412836 2.774253834 1.446213 1.251996 0.81180757 2.486685056  
0.5344369 0.5212064 1.990157 1.84173 2.832541 3.88146 2.737329 1.771357  
1.39734 1.780078874 0.256732 0.492702877 0.7194235 0.837416707 2.124236  
0.5254255 0.829275414 1.752145 0.5041482 0.5238312 1.041656253  
0.8264185 0.4787609 0.277848612 2.565386521 0.2382205 1.2177  
1.020229 2.876121739 2.552125292 4.632402702 0.304599 0.4351873 1.3315  
0.2379127 0.5789212 0.7336564 0.837399 0.2123778 2.385572 0.430262  
0.5789496 1.027543486 0.7964706 1.150969 1.000767 0.5822616 13.55246  
1.501151 0.6684965 0.7909562 2.941102 1.762809 3.561369623 6.50593  
0.6376903 1.811132 0.7817161 3.072767823 1.584702 9.486791 3.569455  
0.2587514 3.679358 0.3340945 0.4758043 0.974355851 0.5215566  
0.3755512 0.303216697 0.6253789 1.636079 3.263813 0.9908545 1.488856  
0.338727122 1.680001124 1.722949 3.100267 1.982265 0.44168272 1.956959225  
2.770380422 1.556707 0.9999712 0.7477666 1.261871 1.420126 0.2434929  
0.5142323 4.345079968 3.741324926 0.7870962 2.098984684 11.51838  
1.481156558 2.514729 2.979279 0.7670779 5.217453 2.466731 0.7778855  
3.169607 0.1112323 1.545025 2.578187322 5.553412 3.689028 0.8244105 1.88205  
2.297985423 0.8839051 1.303264 1.820974 0.62878434 1.60682 0.7615992  
0.4961056 0.222381 1.883264 0.7254442 2.011153 3.937742296 5.058610932  
4.273330483 0.5867319 0.677271522 0.239794902 2.840873 3.296158 2.463006189  
1.867743 0.4763215 1.182389 3.26855186 0.9367007 0.5767459 0.4235409  
0.738050496 0.7742047 1.266027 0.3853858 1.553972 1.297037 1.264494  
1.262763 0.5639677 2.132271 1.14802 1.651843 0.331776601 1.142125 4.269548  
0.9051099 1.293273 0.670215 0.4127591 0.3205361 0.189769518 0.426075523

0.703014237 0.1980303 2.691201 0.4483174 3.010131 1.57631 3.303240099  
0.6852811 3.331618 0.1685193 0.4474186 0.7941654 0.183143565  
0.9915441 2.713957 1.59189 1.756919 1.340984 7.311034 2.591406 1.653364628  
0.402165 1.159992 0.619261207 0.2798592 1.831769 2.467621 3.901087 2.260689  
2.512213744 2.546687639 0.717925329 0.09083977 4.20095 0.380236 0.5848129  
2.656699 0.632669 1.024499432 0.7088282 0.667762523 0.3905766 1.073346  
0.7526839 1.801216 0.6904996 2.792086977 1.310759 0.9471806 1.329297  
1.090485 0.5482214 2.382939 1.223645 2.013355032 1.400854 0.431698451  
0.2306819 0.1736395 2.519150971 6.870345 1.439725 0.7920306 2.462667764  
0.3586593 3.616596 2.799286 1.091900383 0.9916623 0.6987609 0.1999573  
0.3973228 1.710823 3.297158 0.8243111  
AC007038.1 0.07188948 0.731622309 0.2599538 0.827186746 0.521615458  
0.463496491 0.6178997 0.398745271 0.1742282 0.09454453 0.259523855  
0.3591435 0.283548 0.9165635 0.8160615 1.084433 0.296597 0.562427855  
0.2720606 0.1762836 0.325615266 0.3613378 0.716555908 0.9793672  
0.6240459 0.488799405 0.6877568 0.09251923 0.04632209 1.085588  
0.4876565 0.377848753 0.6982585 0.604506549 0.4590778 0.79057061  
0.657181417 0.739420183 0.8627791 1.107215 0.474024348 1.015437 0.178908623  
0.1275122 0.555689127 0.6576575 1.001723 0.527335 0.328222471 0.1826759  
0.7314474 0.620354 0.541523782 0.3849013 0.247042721 0.9425852  
0.4441898 0.7643698 0.06715851 0.2494223 0.1678522 0.6503332  
0.735965664 0.4293672 0.05141959 0.7043959 0.3097317 0.5597948  
1.077554 0.2580402 0.4625893 1.159629792 0.1160223 0.1305423  
0.539758318 0.5747132 0.079700374 0.7271308 0.2142297 0.2434516  
0.45925 0.1372064 1.061429 0.232306031 1.207127658 0.2046632 0.1069451  
0.4675234 0.464290508 0.3035501 0.1806168 0.172159 1.304571552  
0.6767409 0.4542331 0.196157385 1.329305 0.661883964 0.171239855  
0.1654039 0.189821577 0.2477752 0.2945465 0.374299173 0.8364066  
0.4416162 0.319736488 0.7600534 1.364323108 0.38344421 0.1162604  
0.922250258 0.5375592 0.8942353 1.761866 0.2098066 0.4171922  
0.676101012 0.529678 0.461888 0.07561635 0.1823818 0.3993772 0.8231945  
0.4625981 0.5923826 0.5836255 0.8433026 1.453156 1.33302049  
0.986165534 0.2946921 0.43000178 0.680909763 0.2560883 0.92093691  
0.6378732 0.1131013 0.0492618 0.805576192 0.157363258 0.548273808  
0.4290301 0.5321419 0.9580165 0.5501667 1.013341 0.3395891  
0.467074614 0.4236783 0.9171453 0.550622121 1.058777 0.499565 0.358003392  
0.5657516 0.4754928 0.192958415 0.4401155 0.4983851 0.328406707  
0.7494538 0.8348134 0.2523452 0.650175031 0.4503255 0.6499676  
0.125809653 0.1165339 0.662714234 1.060313 0.2245565 0.632786452  
0.3023436 1.942464689 0.5567572 1.843907 0.2034423 0.3575044  
0.1985277 0.517533505 0.3584326 0.1923376 1.168437 1.074181 0.2375424  
0.06871531 0.7564964 0.4851225 1.104782019 0.080975136 0.8416604  
0.4847718 0.6534661 0.243775 0.782644611 0.498274 0.551378873 0.751895  
0.5304908 0.28878205 0.455871479 0.1974065 0.1886006 0.388381458

0.3889382 0.2902019 0.1909816 0.6872123 0.8440134 1.067851  
0.4382592 0.1540867 0.1704068 0.7478024 0.9585359 0.1716078  
0.1927136 0.824702517 2.247761 0.4895652 0.210731712 0.2121973  
0.3341489 0.4954356 1.405187 0.2818474 0.919826411 1.062759 0.3330722  
0.4382095 0 0.6368788 0.085139352 0.142997 1.150498 0.227476 0.700460741  
0.135984094 0.9113561 0.3179851 0.6480292 0.851559695 0.5784424  
0.4641368 0.3088823 0.6290776 0.6918544 0.08131301 0.4633138  
0.2576128 0.1322312 1.190370526 0.401442 0.218068964 0.4181061  
1.816124 0.9090967 0.269909 0.4726626 0.3588957 0.4353215 0.372437527  
1.074725 1.214904 0.027480799 0.3633135 0.1585949 0.5124455 0.4769712  
0.2740478 0.683281 0.4083596 1.361534 1.017391857 0.09215029 0.24927045  
1.259355 0.9939822 0.2285698 1.483231624 0.511480266 8.678965 0.3328434  
0.9972977 0.2115826 0.3389882 0.178788873 0.2959265 14.50646  
0.1725519 0.496087493 0.09313499 0.08816855 0.226674712 0.06677703  
0.280505185 0.06260312 1.179028 0.58329812 0.5636647 0.4319261  
3.57726935 0.758897964 0.2077961 0.2663053 0.5516488 0.7892375  
0.7407749 0.9307923 0.6922337 0.6673709 0.2275619 0.632071214  
0.1247759 0.305091898 0.2590012 0.256258144 0.8000468 0.07738345  
0.417968888 0.3696742 0.1153056 0.2828784 0.110961533 0.3120453  
0.07567012 0.088327379 0.970759979 0.02154029 0.432632 0.7713188  
0.750463981 0.757249495 1.157808275 0.2392567 0.1611491 0.3873981  
0.08736449 0.2613429 0.279662 0.2608099 0.2173034 0.6661206  
0.219496 0.3557665 0.318203654 0.3502313 0.2806181 0.5469436  
0.3003893 17.27442 1.989775 0.3483939 0.225525 0.8118303 0.3780402  
1.233974789 1.765078 0.3015515 0.7975652 0.375056 0.631050647 0.1110185  
1.386234 1.055716 0.1710985 1.335785 0.1045175 0.2160956 0.593367482  
0.2176821 0.1682526 0.245613798 0.1696434 0.5436998 0.746972  
0.3688633 0.6200287 0.290769636 0.241140271 0.3305453 1.081791  
0.3240309 0.150642128 0.720935894 0.344440759 0.3695165 0.4905787  
0.1984062 0.1717212 0.6761186 0.2386073 0.1411343 1.30272812  
0.54163473 0.1900207 0.532857112 11.66519 0.341854333 1.25979 0.6749788  
0.3034144 1.775891 1.14311 0.4124346 0.9179774 0.05148642 0.2778477  
1.043140936 1.662952 1.070147 0.2991722 0.3351598 1.254016602 0.4118406  
0.3179457 0.6547269 0.218170759 0.4513177 0.3987484 0.2002707  
0.181164 1.019232 0.3987267 0.2792724 0.62895073 1.147514331 1.395095153  
0.2152161 0.308846217 0.046617699 1.159652 0.932836 0.636009815 0.8144758  
0.1650297 0.2828086 0.849005943 0.2497382 0.1010119 0.135352  
0.151531986 0.2177195 0.5494169 0.2529818 0.1893519 0.6202679  
0.8472914 0.5035679 0.3175338 1.130891 0.7367885 0.6044118  
0.168927377 0.4151903 0.2068606 0.470673 0.3597564 0.2018642  
0.2202751 0.1221849 0.089436211 0.324424831 0.231780501 0.1539936  
0.5389488 0.2170915 0.6915279 0.554209 0.725317679 0.2796041  
0.834144 0.2444094 0.1804053 0.08289447 0.129470212 0.4942633  
1.188102 0.7922531 0.4315966 0.4310174 2.135128 1.372635 0.83280399

0.1945901 0.4393052 0.270102255 0.1379319 0.7948836 0.7737446  
0.8935881 0.2958124 1.157135072 0.940590724 0.221538707 0.04709292  
1.129041 0.3402684 0.1697792 0.6392075 0.2081454 0.377028491  
0.3303997 0.072120782 0.1715947 0.449027 0.3693683 0.6513417  
0.03486692 0.731137244 0.3100985 0.3226352 0.5011861 0.4781367  
0.0312316 0.3886752 0.7020575 0.630499995 0.7319681 0.405352069  
0.1630767 0 1.26014828 2.079083 0.52112 0.1404693 1.057964689  
0.235361 1.011147 1.43576 0.265829388 0.2275942 0.2648525 0.04936255  
0.101539 0.6617528 0.7407899 0.3282619  
AC007292.1 0.7204945 0.649583908 0.5254433 2.214102934 1.537576933  
0.619370485 0.6455581 0.565928461 0.5135761 0.5320463 0.318751652  
0.9624135 0.7408408 0.7265274 1.477075 2.150444 0.4253279 1.083998789  
0.2954585 0.2598174 1.026787412 0.4473517 2.33222859 3.079362  
1.138746 0.916900955 0.9774556 0.2045407 0.1820595 4.1354 0.2509877  
1.218867562 0.4046175 1.04173595 1.460633 1.542647062 1.174677576  
2.345845557 0.7235057 1.543671 0.964328012 1.297065 0.505398874 0.3937691  
0.366398452 2.629048 1.752211 1.460228 0.394901359 0.4251138 0.5344187  
1.523859 2.15368564 1.264248 1.230428964 1.984627 0.6439414 2.101495  
0.2309586 1.214724 0.5607523 1.794639 6.982825691 1.045541 0.2598353  
0.5590208 0.2756234 0.6742422 1.334058 0.1049146 0.6136129  
0.865761517 0.4702519 0.2565349 1.473200949 0.550925 0.637679301  
0.9364277 0.7893617 1.758187 0.5264548 0.3707423 1.326113 0.212515885  
1.524975328 0.4661787 0.6675764 0.659105 0.406302817 0.7524296  
0.4589725 1.504306 2.502996754 0.989568 0.4196717 0.44972455 0.5794848  
1.321678612 0.482820941 1.110564 0.209827907 0.4869148 0.631448 0.750264128  
2.403338 0.3857071 0.221763298 0.7989114 1.515002922 0.363990606  
0.3628623 1.76920637 0.63856 0.8195831 1.707926 0.5377838 0.4452602  
0.684149511 1.723983 1.686425 0.2600452 0.3584072 0.6540292 0.5352679  
1.704513 0.1293466 0.7424734 1.046661 2.006195 4.286588433 0.830554581  
0.4550177 1.96164638 0.490632299 0.6968095 1.43030749 0.3958468  
0.2381366 0.169411726 2.374614003 0.298197649 0.776595555 0.3340614  
0.5010825 1.594484 0.6731742 3.426998 0.884617 0.786746132 0.6848727  
0.9153544 0.280917777 2.636166 0.8738376 1.035382969 1.023348 0.6485108  
0.717166982 0.9817691 1.259229 0.474535003 0.9910344 0.782981 0.7996314  
0.553665582 3.185842 1.490163 0.329646026 0.6401765 0.515506095 0.8237767  
0.5516083 1.038889028 1.049665 1.685645753 2.252579 2.735902 0.165432  
0.6362706 0.2384166 0.774507194 0.7043729 0.8595811 1.769294  
1.801063 0.5728982 0.1104838 1.190991 1.248418 2.070414426 0.185649429  
1.428443 0.4048754 1.193724 1.160784 1.261391189 1.500023 1.255190813  
0.9560842 0.4620138 0.340499586 1.007836511 0.3636871 0.4592564  
1.791923871 0.5471843 0.9597557 0.540442 1.170022 0.5805137 0.9917492  
0.4179567 0.1297728 0.1944432 0.9996302 2.401672 0.7166237  
0.3714277 1.45042444 2.624253 1.946509 0.258824305 0.6254985 0.8526673  
0.9388325 1.543135 1.31083 3.144303089 1.267435 0.3890167 1.896354

0.1454543 0.6682062 0.501934144 0.5058184 0.619573 0.5916492  
2.294181069 0.400843194 1.564447 0.4594762 1.168599 0.868901728 0.9390333  
1.964517 0.35996468 1.390759 1.529545 0.1743186 1.062227 0.5207114  
0.6125126 1.827541881 0.4176491 0.214268835 0.3541552 2.620949 1.98724  
0.5156773 1.686599 0.975274 1.087936 0.643562544 1.571903 2.471027 0.445531541  
1.130444 0.3172277 0.7901319 0.5272418 0.4543967 0.5874523  
1.078342 2.508388 2.66882376 0.839594 0.436896089 2.151011 2.134424 0.33688  
1.553557 1.507701213 0.2788356 1.457678 1.81438 1.496848 0.3955335  
0.175673249 0.6300008 1.843146 0.33909 0.779908059 0.2353166 0.2126424  
0.577880085 0.3280668 0.502016723 0.3137121 1.748515 0.769880697  
0.9208459 0.9290901 0.62028192 2.120810791 0.4491849 0.3637777  
1.274516 0.4255705 0.8309266 2.701827 1.440361 1.180334 0.1676973  
1.886459326 0.392325 0.376461983 0.3053853 1.021981403 1.109795 0.5702621  
0.762701174 1.645664 0.4758441 0.5836926 0.708681262 0.4226212  
0.4907197 0.160224299 1.216150143 0.9735867 1.023815 0.3383382  
0.948067959 0.821435018 2.119298306 0.5289466 0.6333634 0.06920858  
0.3181206 0.7206651 0.5440812 0.9671935 0.3416265 0.8150534  
0.209842 0.4957493 0.347398389 1.376512 0.7618799 0.598831 0.9286572  
1.710644 0.5865302 0.3783567 0.6647849 1.794787 0.4360528 1.7726636  
1.692529 0.6584369 1.758471 0.3302323 0.904943363 3.272517 2.614173  
1.398632 0.2017403 2.709692 0.6601895 0.8544983 0.515754918 0.4896926  
0.6553781 0.579200795 0.5556238 1.015028 0.7916819 0.4429766  
0.9223764 0.588211246 0.648095377 0.4546991 1.679824 1.282634 0.207223796  
1.536229881 1.261452368 0.9585238 1.057588 1.012234 1.012372 0.7196977  
0.3857069 0.3697996 3.669949176 2.128784219 0.2653238 1.240037523  
1.670329 1.007691257 1.221864 1.345939 1.065646 2.248293 1.17798 0.6453941  
0.5862873 0.6070705 0.4236298 1.499945673 3.331773 0.2543948  
0.1679764 0.6037519 2.063874307 0.5721108 0.7614874 0.927574  
0.907915155 0.5701537 0.3275703 0.8078369 0.3155579 1.581269  
0.4788402 2.042798 1.350750582 2.563845373 3.52487274 0.1691725  
0.766646346 0.435150602 1.538249 0.09374115 0.428521052 0.9791167  
0.3243078 0.4071269 0.886349117 0.4089769 0.6252852 0.3989799  
0.725845324 0.6138732 0.897306 0.4589045 0.4820444 0.7949465  
0.6901204 0.7236341 0.2472455 5.516794 0.5904051 0.8325408  
0.294243658 0.3902179 0.1829302 0.7257236 0.7471434 0.1622835  
0.8719301 0.6302925 0.39544952 0.630760262 0.376951333 0.3026201  
1.378846 0.9222451 1.115368 1.265281 1.147237909 0.4848206 3.471281  
0.4138759 0.1519384 0.4683371 0.270329811 0.4856501 3.087459  
1.329847 1.294161 1.00412 2.402057 6.255744 0.744737044 0.266313 0.7769696  
0.29572628 0.4065846 0.8747556 1.165734 0.7817176 1.141869 1.599599904  
1.209861468 1.208113526 0.1388168 0.9122707 0.9165493 0.4110937  
1.457119 0.5019992 0.773130343 0.9501719 1.154070619 0.1011626  
1.972433 0.4466851 1.376264 0.2912042 0.463774792 1.748682 1.252587  
0.5540088 1.409414 0.6214188 0.8360559 1.090167 1.656123138 1.713418

0.656334229 0.2002935 0.2110716 1.200667725 1.984246 0.8176104  
0.2229577 1.454171621 0.7111232 1.439772 1.729295 0.230467917 0.5327609  
0.5792374 0.527463 0.5131004 1.722663 1.29401 0.3166771  
PRKCQ-AS1 0.7351845 1.977205235 0.3776792 0.682245112 0.306272881  
0.387579291 0.2651518 0.542372343 0.2296929 1.631682 1.788099579  
1.807814 1.303495 0.935635 0.1739157 0.4047601 1.413097 0.081480674  
0.3640634 0.4844236 0.765846498 0.951375 1.290484142 2.818383 1.208877  
0.677882067 0.7945198 1.045477 0.2966185 0.9436354 1.088993 0.813665479  
1.04868 0.599024938 0.8687215 1.104108708 1.188984831 0.485045253  
0.5673196 0.9637349 1.493791157 0.7420206 0.248498883 0.2161352  
1.222819669 3.293318 0.6219546 3.105872 0.230863068 0.8474314 0.494513  
0.2570357 1.034448766 0.6337733 0.616079037 0.9347067 1.472903  
0.7516249 1.641117 0.8394222 0.6638615 0.4260759 0.233901215  
0.3427968 0.3403273 1.785841 0.1254717 0.7073945 0.9335291  
0.1106024 0.9278468 0.437751568 0.2294362 1.445638 0.884778549  
0.7787902 1.051798318 3.055318 1.709702 0.2200823 2.479462 0.4651339  
1.01276 1.697251306 0.907347912 0.6097159 1.446635 3.514385 1.897768439  
0.22218 1.379427 0.8059572 0.950802009 1.035689 0.5209491 0.578778527  
1.306429 1.302855704 0.344939767 0.7995513 0.433469424 1.239208 0.8926179  
0.14380705 1.056342 0.4759276 1.312389159 0.6857629 1.172113725  
1.36231168 0.3748065 3.353910678 0.6029143 1.460548 2.752556 0.9431805  
0.6055456 0.786807094 1.702103 1.011255 0.6693368 3.19063 0.1468517  
0.3625115 0.2344645 0.3656899 1.030907 0.3761608 0.49886 0.698387905  
0.854151747 0.4360781 1.665964905 0.45311174 0.3450329 0.553904028  
0.1991693 1.278057 0.436052997 1.272099 1.009775492 1.339687193 1.221168  
2.346841 1.325594 0.7683199 0.5015297 1.36986 0.904798481 1.961375  
0.342741 0.358966532 0.5982142 0.2450361 0.412180484 1.351259 0.6736446  
3.730465404 0.6922366 1.419444 1.811855602 1.491952 1.173825 1.53626  
0.253064872 0.245955 0.4533766 0.730576312 1.286916 0.473246698 0.3018631  
1.062583 0.1719753 0.4175739 1.123145113 1.258283 0.569853 0.194219  
0.941358 2.62559 0.530834963 0.6961496 0.4942812 0.4928687 0.8129356  
1.098104 0.1870635 1.141417 1.331327 0.731686958 0.432096251 1.686014  
1.013425 1.528848 0.1430316 0.483554896 0.2994972 1.273887854 0.8746388  
0.6198962 0.290974627 0.795706482 0.5112053 3.127314 0.839587032  
1.503304 0.2799413 3.120629 0.5958066 0.1653156 1.177755 1.518485  
0.8892534 0.4441335 1.026803 0.6282301 1.199871 1.922224 1.14728252  
0.8240709 0.7654934 0.808646398 0.595181 0.6565586 1.144688 1.68128  
0.2689475 0.384320883 0.4904555 0.9338361 1.475008 0.022304 2.915312  
0.126820089 1.723606 1.350077 0.7333491 1.015394295 0.819538261 0.3119815  
0.3910318 1.494712 0.744834925 0.814689 1.089303 1.278461101 0.9353476  
0.6889635 0.7308998 2.08329 0.4907201 1.168698 0.354965106 0.5870553  
1.343576645 0.4018661 0.603914 0.7675808 0.2569907 0.6395308  
0.8998269 0.5186525 1.211781464 0.6396722 0.7138842 1.645840051  
0.6120205 0.3552274 0.8730573 0.3031776 0.6967728 2.55763

0.3412811 0.2192429 0.775231644 1.150172 0.692776041 0.1662482  
0.4574664 2.236943 0.523239184 0.588681253 0.7616038 1.568943 1.008098  
2.40286 0.8339538 1.728506813 0.6502222 1.705864 0.9058699 1.650608343  
2.473222 0.7879936 0.958812119 0.8132774 1.205632267 0.5765487  
0.6165052 0.344323141 1.757359 1.117969 1.54560485 0.963365664 0.4696234  
0.789018 0.4591027 0.8265894 0.4481729 0.9193256 0.8512516  
1.636475 0.273219 0.437476268 1.076285 0.64942594 0.2829182 0.166079399  
1.830281 0.5377812 0.790930383 1.027289 0.7948084 0.1278622 1.029223809  
0.9434817 0.6498609 0.944364162 1.309506449 1.212981 0.5095354  
0.9442314 0.875989111 0.598989799 1.060384618 1.824947 0.7992172  
1.426049 1.228227 0.747827 0.2622974 0.9934843 1.739348 0.6675092  
0.7809678 1.096418 0.492748732 0.3575771 0.3254461 0.8328985  
0.3270243 2.295216 1.336588 0.4921109 0.5058299 0.3906018 0.2878884  
1.200246648 0.4986391 0.7509259 0.7620383 0.514635 2.052553536  
0.2069959 1.303761 1.179565 0.3325501 0.8358786 1.421488 0.6194094  
0.515777964 0.2103802 0.2987713 0.704273269 1.59749 1.382369 0.3461701  
0.5094458 0.5696783 0.144958534 0.593068613 0.8839962 0.9659419  
0.7820094 0.136181723 0.564376334 0.990745885 0.843466 0.4095637  
2.285126 5.853741 0.8807463 1.630819 0.5006 1.35563286 2.054748723  
0.9041066 0.591570259 1.943044 0.438300686 1.832279 0.2972415 0.4741701  
0.463102 1.123697 0.6156534 0.7996038 0.8436127 0.4817828 0.886465837  
0.4257456 1.014232 1.424714 2.730041 1.304868393 0.8023864 0.1347307  
0.5133055 0.851996649 0.4626371 1.49581 0.4407051 1.888981 0.7766686  
0.9567558 1.098688 1.000085681 0.813536588 0.586732008 0.9727855  
0.404104568 0.772617696 0.2293233 1.820743 0.896660849 0.1002633  
0.4075049 1.133382 1.159257408 0.940689 0.6335018 0.3143955 0.535102194  
1.652648 0.2055506 0.5314288 2.689209 0.8024901 1.064531 0.7077396  
1.161076 0.5489651 0.7436625 1.094701 0.555315409 0.367176 0.09934571  
1.669239 0.6513695 1.693534 1.561041 0.3796931 0.596908291 0.448504152  
0.690911988 0.604907 0.5630541 0.2308853 0.6192493 1.02228 1.089490135  
1.997954 0.8316982 0.2908758 1.405177 0.9523279 0.387092482 0.230856  
0.3091437 0.5502083 0.6684971 0.4556313 1.930887 0.8635512  
0.449390734 0.4201446 1.025934 0.505790367 0.3492517 0.2155744  
1.224075 0.6807762 1.404735 0.915302167 0.951758206 1.057690791 0.6651936  
0.5375317 0.5999631 1.404633 1.030497 1.133267 0.671485653 0.4052268  
0.483162118 1.701505 1.233691 0.2300996 0.5796994 0.1083499 0.674549655  
0.6246519 0.3868116 1.614969 0.679347 1.11611 0.5875878 0.4781243  
0.895879972 0.7136037 0.699980879 0.4184653 0.231184 0.201370981  
2.383085 0.9070513 0.2075723 0.557457363 0.6250069 0.8085394  
0.6367577 1.753747151 1.104377 1.255071 1.073769 1.237554 0.7235086  
1.953234 0.2967514  
HM13-IT1 0.4884648 1.197861921 0.825802 1.468248461 1.074000367 1.450587782  
1.352771 1.413965166 0.8071512 0.3185446 0.623416152 2.98478 0.756315  
4.900361 2.255088 2.029851 0.7922462 0.935334051 0.7960307 1.930319

0.561297076 2.32125 3.04297241 2.944099 1.957948 1.166546741 1.099993  
0.142872 0.4768834 1.908529 0.3825064 0.484406587 2.617363 3.619123758  
0.8102022 1.891429864 1.641028973 2.709458882 2.251194 1.247698 1.484636155  
2.258036 0.230231778 0.6001058 1.174267081 0.7234283 3.535777 0.394828  
0.372383107 0.1781657 1.892207 6.343933 1.114991383 0.4075753 0.999776435  
2.13881 0.3598354 1.407366 0.2419876 0.8708153 0.6220904 1.282049  
2.557144742 0.6342186 0.1814955 1.673473 0.4331778 1.747507 5.236063  
0.8244341 0.5714796 3.472018992 0.08958322 0.2150281 1.811099174  
0.7215415 0.140659006 2.311141 0.4548808 1.503792 0.07879922 0.0706266  
1.172339 0.346366401 1.930671597 1.091807 0.3885862 1.423011 1.030654013  
0.7670531 0.4616541 0.3038343 2.479475232 0.9874502 1.046934  
3.634972669 0.2312978 2.637699958 0.459888179 0.1702824 0.195420248  
0.2267406 1.323203 1.202257355 1.649792 0.8082515 0.406617958 1.201002  
2.077983579 1.686066481 0.1689733 3.707381889 0.6442732 5.152323  
2.775527 0.05634645 1.19963 1.184310597 0.477138 2.528855 0.4281563  
0.04172468 0.8614709 2.280702 1.55479 0.5420929 4.933206 1.135808  
1.136214 2.919335297 3.380454053 0.390065 1.707497035 1.495451256 0.4461625  
1.89619875 1.451624 0.1996066 1.420012891 1.786262507 0.798451196  
1.891256621 0.4000158 1.643511 2.455617 1.41064 3.44508 3.70744 1.236473204  
1.857259 3.033322 0.981107966 1.206413 0.8477461 0.542412707 2.58126  
1.139771 1.658292346 0.9551762 0.628267 0.676185721 2.206513 3.04709  
0.3896819 2.588159293 1.390823 2.032197 0.259040663 0.2617548 1.307666113  
2.690886 0.635744 0.841112784 0.788528 2.80339694 0.6743275 3.974947  
0.3033308 1.083313 1.362554 1.229533466 0.4612554 0.5748693 2.22454  
1.887069 0.6669507 0.07717312 0.7434084 1.855029 2.259669303 0.055575631  
6.144164 1.297581 1.932942 0.46332 0.765151988 1.244226 2.731423224 1.639211  
2.829984 0.743248746 1.40795138 0.8129157 0.6078154 0.782288862  
1.911046 0.7432598 0.9909368 1.976068 1.49452 2.168573 1.950713 0.2039546  
0.7470042 3.867195 3.256464 0.2650039 0.3662724 1.369858056 2.535063  
0.6329361 0.976262013 0.7489918 1.109029 1.366201 1.872112 0.4255685  
2.530521404 3.006699 0.5434578 0.5183244 0 1.000164 0.62152162  
0.2944293 0.5466605 0.3306145 2.14150906 0.279989722 1.755053  
0.5391876 1.883696 1.416168797 1.915967 1.286455 0.488081654 0.613546  
0.9081318 0.2283035 3.219608 0.4091826 1.341866 3.114761081 0.7779432  
1.02628925 0.8905612 2.746106 2.334517 0.4631163 0.6914892 0.6234993  
0.6430137 1.348588926 2.077711 1.95115 0.084873986 3.033792 0.1049609  
1.022654 0.7082296 2.11598 0.7620535 0.6306059 3.237907 1.787305058  
0.3104778 0.62421696 1.381317 1.341809 0.8067818 2.883431716 1.228654141  
0 2.760864 1.732577 0 0.6543495 0.613540467 0.5077578 3.751972  
0.3552825 2.928123912 0.1232768 0.1980415 0.529791047 0.3208174  
0.866335535 0.3093579 2.759327 1.613289325 0.7970243 1.37005 3.89941275  
1.095822968 0.1711399 0.1604838 1.47352 2.853713 2.389104 2.062788  
1.603464 1.896271 0.5271158 0.878463581 0.1541474 0.175306267 1.333201  
0.325890748 0.8720933 0.2389975 1.92608964 1.071831 0.2374128



0.6989321 2.056216939 0.625133 0.5608942 0.41968865 1.499087916  
1.153132 0.3763878 0.6806301 3.362076782 1.646481621 3.460520655  
0.2216821 0.3871048 0.07251348 0.5396475 0.4165952 0.7255343  
0.7275546 0.5816528 2.561924 0.3664376 0.3196448 0.072797527  
1.480199 0.8666843 1.222678 0.2715358 8.603193 1.502206 0.9627446  
0.5065675 1.998024 1.370627 2.170885635 3.021266 0.5519033 1.882497  
0.6318295 3.00249701 0.2057273 9.254122 1.941682 0.5495723 2.706005  
0.1383431 0.3581212 2.20852454 0.7430767 0.630998 0.60685926  
0.5821564 0.6716831 2.332932 0.9282599 1.503324 0.52825713 5.300922187  
1.633413 2.207508 1.915748 0.24813636 1.073059449 1.547344696 0.8216967  
0.49751 0.7541837 2.171942 2.204191 0.7131626 0.145297 3.25950691  
4.062586496 0.3706583 0.750679394 9.172894 1.21824386 2.560424 1.962034  
0.4785142 4.570675 2.411057 1.006457 3.496695 0.3816359 1.065262 1.676343778  
2.80875 0.1066171 0.3519955 1.840241 1.67830396 0.4386078 0.6751043  
1.410776 0.911634377 0.9558083 0.9286931 0.6510872 0.1525969  
2.692267 0.5473158 0.1916729 1.387502664 3.386062426 2.008579908  
0.3988147 0.853459354 0.335948617 0.8953915 0.2619135 2.282336023  
1.770684 0.4530591 0.650009 3.223047755 0.2142534 0.2495788 0.04644804  
0.99450847 0.5847158 0.8255019 0.4407503 1.116456 0.7218531  
2.341388 1.049801 1.073216 4.624189 2.430209 2.302864 0.284579649 0.8548722  
2.491653 0.4025536 0.7070647 1.020198 0.1166256 0.490576 0.138111115  
0.469012207 0.296213864 0.2717752 1.256252 0.2366412 1.289523 1.543855  
2.731867595 0.4063777 3.232928 0.4175789 0.7959695 0.6400454  
0.199933284 1.017683 2.4141 0.7476518 1.011225 1.159424 6.009013 0.9621245  
1.849600781 0.3434218 1.145731 0.572027152 0.4102224 2.553184 1.380714  
1.709315 0.9571171 1.380223182 1.373272065 1.094749699 0.0484819  
2.053273 0.5798141 0.4119974 0.9476072 0.5844123 2.582032744  
0.945768 0.254564365 0.1589902 0.5982327 0.994533 1.709019 0.4307436  
2.058019798 1.165937 0.2430374 0.9190685 1.302986 1.012812 1.881735  
1.858537 0.84832375 4.609996 1.375352065 0.4197163 0 1.808379286  
4.052732 1.246042 0.3337208 2.055958902 0.254418 1.587921 2.670129 1.255661716  
0.6615724 0.6860582 0.266797 0.5376024 2.070355 3.601351 0.5898654  
COLCA1 6.522159 1.194133527 0.7331216 1.920084986 0.206030745 1.143758397  
0.07090145 0.375590781 0.8847372 0.2423949 0.010891503 0.06412564  
0.1687598 1.415795 0.5822136 0.9830306 0.8538215 0.17793446  
0.3317124 0.2279971 1.813337272 0.4694884 0.811940797 2.526911  
0.7382943 0.195811323 0.6849871 0.3057687 1.891523 0.5340935  
0.5710877 0.657029665 0.3621673 0.651019832 0.8091817 2.301904187  
0.72881874 0.35975423 0.6124225 1.554125 0.292518487 1.172768 0.399817137  
3.666431 0.89662127 0.9936028 0.4878437 0.01609513 0.566726183  
0.7383957 0.5289301 0.0520691 0.688281147 1.647632 0.918078046  
3.506912 0.6289188 1.450935 0.400221 0.4314459 1.639912 5.999748 0.272186889  
1.276241 0.1387246 0.3933962 0.7843298 0.7032758 1.439867 0.02016479  
0.9813574 1.184571733 0.518563 1.019001 0.516805123 0.5412098 0.544725476

0.3021941 0.5630383 7.644356 0.1349142 0.164108 1.6585 0.147247224  
2.141282416 0.1756872 0.1362299 2.177041 0.650311746 1.379304 0.1740784  
1.283476 2.243100733 1.594032 0.4080032 0.129885604 0.1202177 0.241932631  
0.168725721 1.520199 0.215089822 0.07625525 0.3236415 0.184729693 1.26897  
0.3336016 0.47832868 1.376779 0.861206371 0.157102529 1.253649 0.455236382  
0.9212513 0.6168566 0.2917927 1.348314 0.3060953 0.373521742  
0.5835146 2.02873 0.1428035 0.2211174 0.7821689 0.2682489  
0.09250185 7.077004 0.1546936 1.492812 1.574801 1.016132033 0.560766451  
0.3886903 0.170147929 0.060961943 1.167325 0.720620384 0.4797427  
0.6590926 0.134379849 0.683958164 0.01415165 0.272528629 1.426828  
0.9249391 1.181544 0.5410663 1.384604 1.330372 0.302428348 0.3527444  
0.6455421 0.221304463 0.8075761 0.7962232 0.896362452 1.647983  
1.188372 0.130975283 1.578473 2.684059 0.274025082 0.4285773 0.2149864  
0.4018993 0.54572117 1.103697 1.034519 0.45231017 1.833977 1.052231803  
0.2173178 0.3816727 0.570792537 1.114899 2.621588639 1.707061 0.2524059  
1.441435 2.119736 0.2962369 0.230560404 0.6054578 0.3905749 1.074092  
1.151412 11.58489 0.1164004 4.64965 2.384942 1.484897449 9.352132098  
0.2183552 0.6225429 0.1552749 1.362239 0.630916055 0.08809394  
0.754680035 3.005147 0.2823384 0.176943075 0.78303203 0.2609652  
0.2560346 0.495357048 0.1424524 1.964083 0.003847186 0.1491745  
0.1714373 3.714713 0.2953625 0.5127086 0.06090313 1.121037 1.139232  
0.2916773 0.253828 1.359407261 1.697983 0.3440211 0.072961602 0.06679003  
8.888685 0.969059 0.7701029 2.25212 0.408733259 0.6353099 0.2848373  
2.615356 5.042131 1.484086 0.142272934 0.7705531 0.4206213 0.2055314  
0.69126107 0.1597926 1.347198 1.500916 0.3935421 0.665956788 1.091348  
2.175604 0.258655891 1.634062 2.210307 0.524902 0.6416523 0.4763151  
0.2663703 0.582826746 0.6540763 0.376529344 0.9511556 1.312374  
0.6198675 1.915579 1.115012 0.6227139 0.3383783 0.017786066 0.4234885  
0.446639 0.207592848 0.2083793 0.4535446 0.2898337 0.8153148  
0.2501474 0.1601045 1.593809 3.671805 1.570001224 0.6497054 0.468209181  
0.5156743 1.122153 0.6269349 1.289179622 0.357757009 29.31524 0.114941  
0.8593117 0.7458815 0.2703016 0.145063364 0.9024634 0.9761732  
0.1031918 0.621806921 0.2780704 0.2583407 0.439650911 0.8257881  
0.3001868 0.05202016 1.49548 0.712460685 1.326986 1.093484 3.4441166  
1.779400005 0.3209191 1.182486 1.105625 0.9330746 0.6371723 0.3864533  
1.696929 0.2470281 0.8069874 0.740083521 1.043111 0.343024561 7.491306  
0.79140098 0.7939681 1.646518 0.322420379 0.2488606 0.410352 0.05935814  
0.181613268 0.118923 0.1886346 0.460220587 1.414700922 4.706156 0.4035318  
0.8000047 0.284492484 0.889322548 0.260975484 0.6928254 1.041499  
0.1566683 0.08799474 0.6113689 0.6422292 0.3368381 0.2462299  
0.3544515 0.3868889 0.3436739 1.175163659 0.8524982 0.1115694  
1.398209 1.350434 1.368737 0.4787642 0.4467141 0.5523923 1.220142  
0.1800367 2.525084946 1.686779 0.4977747 1.128238 0.1300089 0.13528038  
0.3298673 0.9582852 1.341112 0.2378193 1.81017 0.9060868 1.137378

0.90604976 0.2134827 0.8337141 0.590633263 2.598605 0.8670683  
0.266285 0.3250837 1.803467 4.770577851 0.041075271 0.2367501 2.257018  
6.601968 0.26552551 2.948290123 0.339040888 0.1767865 1.508165 0.4803787  
0.08442093 0.390154 0.7985113 0.564661 1.123196483 0.587756658 0.6572786  
0.847422871 0.7085032 0.350942023 0.5443896 0.707342 2.602505 2.038089  
2.012534 6.302948 0.3178311 0.8686189 0.390828 0.190059531 1.004315  
1.116983 0.7120724 0.5368422 1.270957242 1.590111 0.3552655 0.7783045  
0.384553132 0.6136742 0.403271 0.5016346 0.1347797 1.274789 0.7709788  
0.7735395 0.984168842 1.518358005 1.455343655 1.100101 0.397028963  
0.688658668 1.338354 0.6219283 0.4850242 1.002525 0.3586048 0.1291756  
0.104664433 0.5450029 1.386215 0.4354936 0.10969932 0.4004429  
0.5515109 0.1780381 0.08235547 0.5432544 1.108863 0.4089305  
0.02715491 1.118996 1.522033 0.546188 0.419564621 2.874268 0.01823088  
0.3865481 1.23529 0.2895777 0.625974 0.5522604 1.004970677 0.476242952  
0.545393502 0.8973903 1.157369 0.9903902 0.8739312 0.8906686  
0.583549191 0.1553058 1.686501 0.5159148 0.6651764 0.0921896  
0.699564263 0.1476892 1.198641 1.695683 0.3972351 8.155632 0.874846  
2.814101 0.501873383 0.1574951 0.3588959 0.130195729 0.8824431  
0.3923028 1.526902 1.110526 1.007343 1.957207092 1.067951308 0.705670416  
1.836039 0.3247042 1.003056 0.2274964 0.6094818 0.2414116 0.617091118  
0.6128081 0.07782971 0.4256002 0.9710423 12.96869 1.664775 0.09803901  
0.727090013 0.7808389 0.6479438 1.29947 1.099503 0.3027727 0.920505  
2.855321 0.913275096 0.7733882 1.144323673 0.3473269 0.5100025  
0.788466657 4.351226 2.052956 0.3128943 0.832123393 2.41652 2.5871  
2.223601 0.771741598 0.1634992 0.5636447 2.852608 0.09131382 0.9478529  
0.3229793 0.4283161  
AC104564.3 0.1699838 0.70864715 0.245866 2.023341105 0.145102137 0.350702377  
0.2959056 0.523799791 0.1373218 0 0.477282043 2.099841 0.6095034  
2.549681 1.286394 1.585117 0.682354 0.17049612 0.3724321 0.2652525  
0.393913862 0.6835113 1.200134834 2.284853 0.843181 0.525351853 0.871185  
0.2187632 0.4016076 1.935041 0.1464218 0.505714795 0.874912 0.923590006  
0.3790624 1.342748802 1.586978104 1.422403483 0.5979472 1.309014  
0.473593612 1.312556 0.141010775 0.6317242 0.55323617 1.448532 1.301423  
0.4534153 0.221739236 0.2273368 1.300835 4.367915 1.219468302 0.7800904  
0.080570551 1.637455 0.241051 1.946393 0.1852636 0.2564187 0.2116743  
1.766746 1.957728017 0.1765645 0.2779027 0.9395442 0.3592737  
0.9108947 1.664623 0.2103932 0.5468999 1.508678523 0.1028762  
0.1234677 1.071434233 0.2651549 0.188452819 1.969698 0.1266374  
0.05756453 0.180984 0.432569 1.063742 0.037882162 1.529074724 0.4839295  
0.2379986 2.851783 0.548911197 0.3588746 0.147266 0.08722985 2.774387174  
2.041155 0.7374016 0.206141023 0.3541593 0.10097002 0.10562593  
0.2607334 0 0.08679532 0.2954679 0 1.66193 0.4640928 0.266831323  
0.6965731 2.297946954 0.491747807 0.03234113 2.630656291 0.607077  
1.705762 2.348595 0.1725534 0.5442525 1.049860848 0.5218467 2.109819

0.1191974 0.03194406 0.2698097 1.087726 0.6755951 0.363144 0.9296787  
1.229385 2.261678 1.490011994 1.127465821 0.2986304 0.580997796 0.894456732  
0.09315769 1.451713452 1.547953 0.1146128 0.077653547 0.927978464  
0.265777116 1.212220298 0.3828108 0.4194194 0.9862293 1.178154  
1.188743 2.166135 1.118748385 0.8402145 1.707563 1.352030075 1.409735  
0.4932606 0.319435771 1.76337 0.469861 0.436416185 0.9562823 0.8657924  
0.45677821 1.424301 1.525309 0.3281708 2.049799129 1.206776 1.252255  
0.165266086 0.05009931 0.783499247 1.166105 0.1769891 0.303034688  
0.4130512 2.961834084 0.6711372 2.428696 0.03317535 0.5741829  
0.034772 1.430806773 0.2118799 0.08802299 1.248931 2.609824 0.2042447  
0.05908308 1.260254 1.52944 0.968790693 0.127644676 1.688586 0.3820835  
2.045667 0.6650884 1.38460348 0.5013519 0.800318245 0.8017836 1.31137  
0.250370932 0.538957733 0.1944879 0.5041165 1.477320271 0.7106391  
0.5355607 1.047663 1.372781 0.5587913 0.9338855 1.249621 0.05204864  
0.1299773 1.274742 1.858508 0.03381412 0.2453631 0.983204573 2.149834  
0.5384116 0.290662477 0.2150331 0.3537763 1.255142 0.8252178  
0.3554308 1.27937905 1.688062 0.4160666 1.058199 0.04667051 1.123052  
0.073204862 0.09016501 1.307871 0.3796734 1.204545978 0.214357722  
1.394358 0.2358842 0.8292314 0.968041651 1.466848 0.9004791 0.407641217  
0.6263007 0.940643 0.03495744 0.9737894 0.2088445 0.4019951  
3.244666329 0.4094658 0.196429555 0.5908985 3.712741 0.8211855  
0.02363719 0.5882202 0.6099417 0.537039 1.123568205 1.280301 1.206517  
0.032489397 1.145414 0.1071429 0.5965221 0.4554602 1.012485 0.4039073  
0.3620898 1.416522 0.971083817 0.1980826 0.254877405 1.057524 1.463093  
0.2702285 1.13937059 0.940647041 0.5591704 0.8544719 1.915978 0  
0.4675668 0.04697213 0.1814097 1.267269 0.1360006 0.312801834  
0.1258395 0 0.289716763 0.1052636 0.426380807 0.2960522 0.900417  
1.440973834 1.50943 0.8280779 6.46827318 0.745735678 0.06551162  
0.1535813 1.198622 1.001357 1.519064 1.612854 1.997856 1.451768 0.4483948  
1.643996839 0 0.201319455 0.081655 0.320784626 0.8531302 0.07318977  
0.37649302 0.4638085 0.1090567 0.08918273 0.087456778 0.07976607  
0.1073539 0.289179018 1.147688813 0.5432786 0.6051344 0.4342371  
1.793984014 1.059992958 1.54545116 0.3394358 0.3810396 0.0555157  
0.1458175 0.1594709 0.4232098 0.198932 0.1027635 1.188719 0.05610829  
0.275307 0.334398965 0.6101993 0.4539915 0.8129044 0.3118282  
2.378469 0.313657 0.43357 0.2585491 1.229735 0.971611 2.474550259 1.558798  
0.3697158 0.9812583 0.1382066 1.532457255 0.105002 2.890955 2.271874  
0.291287 1.799997 0.141219 0.2243246 0.755476068 0.189631 0.198918 0.203265225  
0.1337082 1.971233 1.071644 0.09690924 0.4932565 0.485314937 0.670800071  
0.9378955 1.461664 0.5472688 0 1.560897659 0.39487793 0.2795929  
0.450142 0.3608729 0.4253726 0.7993466 0.4367929 0.1853968  
3.119313065 1.097746332 0.09459094 0.972592393 2.864518 0.62178468  
0.845593 1.079646 0.2442309 1.722717 1.296514 0.4093467 1.229991 0.1947848  
0.4077779 1.283394377 1.966038 0 0.3368559 0.5283272 1.779085489

0.2686355 0.09397346 0.7920574 0.576558665 0.2134296 0.4636953  
0.09969335 0.2336538 1.490389 0.256068 0.1956575 2.082029803 1.624533233  
2.03380037 0.1017764 0.614965779 0.073485535 0.9140054 0.2506484  
1.460888166 0.9898179 0.2023339 0.3110258 1.212857482 0.03280611 0  
0.03556022 0.044787478 0.3581227 0.6319971 0.1533794 0.244214  
0.2125556 1.318049 0.3869757 0.5949844 2.297389 1.691406 0.694536  
0.07262391 0.4552924 0.7336879 0.4109221 0.6186545 0.5496311  
0.1785751 0.2311266 0.105736682 0.163214414 0.113389393 0.2080687  
1.154131 0.06039015 0.3702179 0.7708448 2.677112744 0.2722294  
2.088367 0.2951029 0.243755 0.3593431 0.076533601 0.6233032 1.515536  
0.9626656 0.7389951 0.2958816 2.628828 1.703374 1.062028836 0.2629208  
0.8309955 0.109484767 0.1207934 0.5513244 1.057063 1.308637 0.9659117  
1.622769314 1.25355091 0.209532738 0 1.273837 0.5271321 0.372771  
0.5239577 0.2982807 1.317854705 0.1524362 0 0.04057384 1.165823  
0.08957717 0.3271026 0.1648868 0.787801127 0.1912781 0.4465616  
0.4443985 0.7647919 0.1476952 1.092899 0.5928665 0.856118709  
1.221706 0.701971807 0.06426623 0.09674926 0.752434579 2.21624 1.430938  
0.3065925 0.843227384 0.1391287 1.458838 2.190244 0.369739926 0.1899353  
0.0404031 0.1167186 0.3772851 0.568991 1.686735 0.9314165  
HOTAIRM1 0.2113435 6.802394052 1.168169 7.211533939 5.18672244 3.23391664  
3.771016 2.756951574 0.8109879 0.8970067 1.801429789 2.869922 1.449302  
4.472047 4.650867 4.337693 2.014906 0.826723833 1.378628 1.507623 0.434104757  
6.745448 5.04696526 4.117231 2.242283 3.118925456 1.372 1.478955 3.302353  
9.476168 1.297095 1.351840551 3.412508 6.083328937 2.08869 1.849500256  
6.052939754 4.49492812 2.744157 3.705902 5.328877857 3.900691 0.887561973  
0.2766865 3.664935381 2.039348 5.550014 7.680935 3.219686743 1.399125  
2.949823 24.10378 5.294008613 2.376251 1.915839533 3.61933 0.8027746  
4.288983 0.6910233 8.241223 1.250095 4.464432 14.570635048 0.7546184  
1.673616 2.469044 0.9019713 2.875563 5.501473 1.726462 0.6119722 4.957374711  
2.078498 0.9338486 6.807580179 1.456048 1.33052513 4.254542 1.249761  
7.658083 2.475223 0.7058883 3.265088 1.460083883 5.386513232 2.283638  
1.211371 20.17843 2.761869989 1.571821 1.510559 1.147807 4.572775511 2.45164  
2.13261 4.762877306 2.738313 8.285481044 0.952116088 0.5402899 1.197471531  
1.2545 4.946237 5.92004182 5.971617 2.15178 2.349934949 1.377036 4.601535978  
2.531568497 0.9449405 5.885172574 1.745448 11.04583 11.78447 3.781238  
2.928745 2.343621674 6.828832 6.727662 1.51905 0.8439765 1.714566 2.12645  
7.299807 0.2418764 2.36595 1.864041 10.00416 5.611104144 4.04609225  
1.382031 11.301980029 4.23707024 0.9845074 3.245976936 2.677159 1.804999  
1.955094143 3.85602084 3.403581544 4.102857915 2.320279 2.064154 1.417787  
10.89457 7.343727 6.500802 3.076155383 1.566978 3.386248 4.793962846 3.414831  
2.695198 0.734744979 6.728476 2.1594 6.116615753 0.9092051 4.844039  
1.713223619 2.326822 9.035983 0.8067666 4.852858332 3.431068 4.293404  
1.592453628 0.3581632 1.637090952 2.621788 1.705413 2.590278124 2.597393  
6.070778561 5.359642 12.27864 1.742704 1.963199 2.572338 5.910308198 1.383026

0.7478424 8.70518 3.447637 2.079139 0.6335831 3.538147 9.688985 3.538255447  
0.502558251 10.34727 1.852697 26.57051 0.9096062 3.633356019 3.677697  
5.978313093 1.885384 5.919231 2.419572762 3.589792003 5.561626 1.145071  
3.847299413 1.637164 1.414976 7.063106 4.763365 1.430862 4.085402 3.467344  
1.795782 0.5979302 3.335973 5.452717 2.217696 1.078618 3.10701846 3.396839  
3.91608 1.561700181 4.4559 2.125968 9.506272 2.470515 0.966684 4.760653499  
4.87731 1.995308 1.672004 0.6237813 1.142433 3.276602668 1.56945 7.984131  
1.337486 4.690496134 1.432514258 2.907764 0.797351 4.314495 3.73110171  
7.812569 6.026487 4.888765363 2.725413 3.432275 1.293028 19.14463 0.7032447  
6.70574 2.57601964 2.105803 1.602719426 1.073753 9.051466 3.513416 1.976376  
4.205224 0.881994 3.658489 1.481899423 5.619602 6.696794 0.898779203 2.136167  
0.4745692 3.499733 1.617945 5.866186 2.817811 0.8003411 7.374957 3.663250828  
0.8004072 2.257862845 2.577771 2.573813 2.43585 3.143074868 9.927006085  
2.711378 3.64843 5.073553 7.961843 2.221523 2.37984801 0.7733124 8.718406  
1.003982 4.521094693 2.053514 1.013242 2.24230317 1.330571 2.046874886  
1.159472 2.981752 2.802551001 6.818001 2.247877 6.34088998 4.621436407  
0.8756048 1.842667 1.775168 3.508643 2.457206 7.801816 1.35421 18.0893 2.25786  
5.771996375 0.7703246 0.917779868 5.659903 1.551030832 2.167538 1.148849  
2.906118412 3.726113 1.909586 1.96816 2.840737617 0.7809983 1.067798  
1.528048219 2.14040895 1.319271 1.952587 4.01546 9.443207963 5.42300379  
7.658483813 0.7033764 1.368618 1.449494 0.9518099 1.685317 1.57855  
2.102349 3.151596 7.37129 0.7848035 1.911138 1.368554588 1.670881 3.614681  
2.312351 1.098486 3.838657 1.429907 0.8288114 1.94884 0.4195285 5.883053  
3.731008141 3.594821 4.219146 3.288318 1.890179 10.968170309 2.317274 23.07231  
4.393909 0.8852839 4.444258 0.9108203 1.123372 3.343443311 0.7073136  
1.581068 2.211324561 2.521329 2.344306 7.266466 1.435824 1.541701 1.173276977  
6.161294165 8.022336 2.115462 3.3409 1.195731963 1.80024372 14.759420478  
2.55285 0.7641627 2.288262 7.187856 5.024414 1.278481 0.9105017 4.447914197  
8.871492751 1.969907 6.114902799 7.553825 1.66211025 1.815949 15.26183  
1.499302 4.785766 4.344139 1.519357 5.262477 2.134202 2.830731 3.627642674  
12.94771 1.090973 2.952668 3.694935 3.486916384 0.9045798 4.030934 5.304369  
7.055257354 1.829091 0.7110408 2.029686 1.246752 2.355706 0.9334125  
1.885296 7.752652584 8.487488384 4.00884415 1.223221 2.891130476 0.62813922  
1.91767 2.477498 7.701658574 1.906179 0.7636792 2.455565 3.743911903 1.29503  
5.137386 1.425855 1.364281673 9.823538 1.222312 1.420707 9.69102 0.581402  
8.439565 3.710275 0.8366259 7.421905 6.161648 4.658066 1.072246403 1.273662  
3.527195 3.757286 1.310014 0.9621058 3.746675 2.092364 0.870949372 1.359610981  
1.116082094 0.9377697 2.735372 0.9291647 5.120811 3.306491 5.408805661  
2.93741 3.089354 0.7261682 1.969918 11.7482 0.737454452 4.707897 10.36359  
1.552731 4.878412 1.798496 15.02378 6.038682 2.778419355 1.522098 6.500484  
2.620389087 0.5181357 2.648408 4.650467 3.855766 2.639982 6.967807366  
2.903445123 0.944367973 3.622661 5.526384 0.6381444 1.042812 4.271974  
4.431741 3.999890086 1.930799 2.34740335 1.57644 5.979128 0.4176476  
3.431461 8.149001 3.836317654 7.511119 1.156702 2.267665 2.5529 1.228038 5.51248

2.625991 3.679609419 2.784771 0.881164476 0.8789352 2.390761 4.780474398  
11.44779 3.49644 1.254754 1.179447393 1.971983 2.708098 7.159653 3.321356953  
0.9741168 1.858651 0.3265155 1.257999 1.27591 4.849646 3.649595  
AC079921.2 0.2779516 1.320639776 0.5025393 1.148783411 0.346012788  
0.686952733 0.2268067 0.499624416 0.2105098 0.2492349 0.487771758  
1.041437 1.712973 0.8933892 1.003298 0.6352763 0.271192 0.348486575  
0.4498205 0.5034384 0.658753052 1.15258 1.082215962 0.8835399  
0.4787291 0.536898048 1.632275 0.3912496 0.2238732 0.6860955  
0.5237395 0.654650581 0.7499246 0.719153285 0.7043516 1.829679686  
0.506830232 1.423380409 1.473803 0.9039079 1.710141329 1.537707 0.396302261  
0.3814958 0.918767211 0.6966437 0.6384125 0.07723009 0.615091414  
0.2787999 2.024351 0.2665022 0.623134901 0.3188941 0.329365331 1.95235  
0.2111562 0.4972927 0.6221018 0.3144652 0.1081632 1.3709  
0.666918336 0.541335 0.2840105 0.6546774 0.2824383 0.6109125  
2.013675 0.1290103 0.3912438 2.300517643 0.5607319 0.5467857  
0.354258959 0.9258567 0.08254056 0.3753028 0.5500377 0.1176594  
0.9248084 0.6631139 1.223011 0.232288425 0.625072305 0.1798419  
0.3952476 0.130987 0.245426641 1.200312 0.4214073 0.445735 0.634225871  
1.390677 0.9174361 0.210671595 1.764472 0.82551313 0.899561493 0.5329277  
0.191125297 0.1774058 0.2156869 0 1.019074 0.1976219 0.636290079  
1.423765 1.896826036 1.256388628 0.2313635 1.344236456 1.589825 0.4721305  
0.742923 0.5731239 0.5909775 1.706941589 0.5866475 0.5580724  
0.1218171 0.5549841 0.9497695 0.3802951 1.183617 0.05301788  
0.5047466 1.164472 1.422391 1.34705649 2.121178829 0.8138499 0.989611631  
0.585033678 0.2221453 0.574304223 0.6084513 0.4685271 0.119040327  
0.199657599 0.597560417 0.963559724 1.251917 0.5357967 1.133893 0.3511804  
0.911152 0.8778634 1.641713607 0.7596022 0.5933312 1.177042055  
0.5961591 1.989874 0.587621408 0.9321337 1.577759 0.527100067 0.574882  
0.3932537 0.373453833 0.6431741 0.6877203 0.2744046 0.942682347  
0.3627347 0.9695284 0.472915261 0.1024008 0.667265842 0.3575202  
0.5426371 0.619389582 0.8117871 1.667004563 0.8441691 1.405512  
0.6102806 0.5542022 0.3553622 0.269362409 0.6496098 0.209901  
2.514083 1.90513 0.0521834 0.3320988 1.204858 0.8931737 0.990082796  
0.304383459 1.109377 0.780962 0.5337769 0.3625097 1.768792907 0.2561853  
0.712371185 0.6412736 0.1165384 0.581530887 0.511459889 0.7155445  
0.435935 1.632204161 0.3417683 0.1026246 0.8860873 0.5440018  
0.4622967 1.413941 0.7787105 0.2659628 0.1594007 0.7984649  
1.019166 0.4492448 0.2865779 1.105294811 1.037512 0.8253672 0.551665518  
0.1831326 0.2892413 1.838576 0.4882579 0.3632425 0.522998908  
0.7841647 0.6378164 0.6759102 0 0.8347157 0.261848162 0.1842933  
0.2138584 0.6143616 1.19682453 0.219068881 1.554549 0.6026713  
0.3684592 1.543334975 0.9723801 0.8052361 0.59018385 1.360139  
0.2925746 0.1429029 0.1243989 0.3912965 0.6847169 2.037528452  
0.7988878 0.301120033 0.325169 0.5485792 0.8886002 0.2174102

0.961837 0.5420409 0.6403158 0.931023253 0.3964969 0.763307 0.232424146  
0.5527776 0.1916209 0.9525508 0.5984618 0.6208424 1.100758  
1.027911 1.776667 0.721764595 0.4453593 0.683757655 0.5688245 1.145297  
0.1972626 0.764145179 0.686657573 0 0.4136454 1.468565 0 0.6826328  
0.480044849 0.6091605 4.317071 0.2779793 1.118868099 0.2250592  
0.4648535 0.355300997 0.2868722 0.774669891 0.3025588 1.344917  
0.925661684 0.3610349 1.636136 0 1.190821052 0.5356115 0.8475662  
1.224965 0.4651657 0.5702879 1.373584 0.4427924 0.2902843 0.2291248  
2.367453989 0.1608101 0.651522851 0.1251744 0.254982651 2.009116  
0.3739917 0.352703626 0.3281553 0.371512 0.09114279 0.357515619  
0.8151917 0.2194267 0.262697423 1.055621469 0.2082071 0.5300863  
0.9763177 0.757278966 1.112567601 0.676893051 0.462528 0.1730729  
0.05673582 0.3725556 1.018598 0.5676708 0.5692515 0.1400293  
0.8503914 0.1146829 0.4064055 0.569580655 1.276916 0.03568995  
1.258743 1.628817 4.861487 1.923303 0.9969728 0.561492 0.4291382 0.7149349  
0.679415636 1.43889 0.1079547 1.723604 0.5178952 1.153996152 0.05365489  
2.080629 1.031913 0.2315358 1.00655 0.3968876 1.01891 0.330891402  
0.3322264 0.929325 0.326436932 0.3643915 0.6131261 0.9329449  
0.1980782 0.4760919 0.7439718 0.651265783 0.8165073 0.7002134  
0.3803217 0.291219376 1.889056305 0.302667424 0.7500616 0.5308098  
0.9957712 0.1580805 1.31614 0.2975952 0.2652601 1.753328168  
0.373957542 0.3866794 1.129509148 5.760514 0.127090055 0.7463351  
0.5277008 0.8735952 0.9353077 0.8309378 0.6152108 0.9612535  
0.2488322 0.09260889 0.983700635 0.941835 0.5839338 0.3786853  
0.3599592 1.010103483 0.5033226 0.2881164 0.98117 0.589230285  
0.5608809 0.2527394 0.5094221 0.238789 0.8101834 0.8564591  
0.3999154 0.086848518 0.494538758 0.304170626 0.1733554 1.021282454  
0.337952706 1.494549 0.4098514 1.17097694 0.4618047 0.2954012  
0.2225031 1.196771839 0.03352712 0.09763742 0.8358605 0.411946366  
0.1829968 0.4305914 0.7524016 0.4159689 0.5647905 0.3771647  
0.3042159 0.3185082 0.9237566 0.4148592 1.556101 1.410180764  
0.2617306 0.6998253 0.8749027 0.4741884 0.5025835 0.7299993  
0.5314642 0.21612113 0.333603088 0.733915962 0.1772014 0.8354768  
0.4937393 0.8197682 1.575573 0.854984496 0.9538712 1.462367 0.5277802  
0.3113903 0.4340117 0.860372242 0.4140514 1.095524 0.3722574  
0.6113821 0.739162 1.312772 0.6116363 0.768803841 0.4366363 1.651337  
0.48486111 0.3703445 0.6146634 1.606592 0.7801489 0.4084719  
0.84850141 1.198449771 0.32120678 0.3034647 0.9971487 0.623778  
0.7912325 0.9885661 0.6096726 0.673409272 0.4284127 0.298763452 0  
0.6382743 0.3204106 0.5292951 0.1404256 0.715658167 1.368374  
0.1521254 1.097567 1.223375 0.1886766 0.4569214 0.8179604 1.086125592  
1.491332 0.607030565 0.2627147 0 0.615177282 0.5353516 0.08124374  
0.3133308 0.689407883 0.1706238 0.6626225 1.566867 0.340079471  
0.7440873 0.4129108 0.5367771 0.3505247 0.9553153 0.4309516



0.2307605

AC234582.1 0.6751229 0.5301652 0.2507874 0.912963093 0.884955931  
0.436905493 1.089412 0.483082149 0.8885721 0.8343707 0.403160678  
0.8750574 2.005965 0.8045968 0.6193832 1.47022 0.769722 0.25868941  
0.4003921 0.7609554 0.327602852 0.671048 1.197153806 1.529448 0.742099  
0.691604035 0.4989248 0.1098277 0.0325855 0.8723375 0.1878576  
0.338518301 0.9949815 1.216849459 0.3229405 1.192548014 1.202465265  
1.686075386 0.6121583 1.19989 0.443823572 1.392913 0.204512988 0.4549026  
0.624929233 2.804313 1.440308 0.6238812 0.798689894 0.2637718 0.9895005  
4.560286 1.451190685 0.5569935 0.332585494 1.27877 0.5993228 1.279622  
0.4133761 0.4691577 0.3778446 0.6643195 1.832238653 0.2265304  
0.1550201 0.8290276 0.2651586 0.7558235 1.000574 0.5821148  
0.5369276 2.180075628 0.2754555 0.1377459 1.082835687 0.1627  
0.048056244 1.743086 1.264475 0.7835018 0.3769053 0.3136851 0.8010607  
0.126788908 1.78551024 0.2257732 0.3783681 0.8651016 0.489911145  
0.3203007 0.1380089 0.2140982 0.798242395 0.9277483 0.994366  
0.873923194 0.3753595 0.856113364 0.157121105 0.2036198 0.275407518  
0.1549322 0.8947281 0.157981551 1.105056 0.6558317 0.277842597  
1.448564 1.666397473 0.37717281 0.1298922 1.506053384 0.4233007  
1.054591 2.882213 0.3946414 0.9183771 1.735609034 1.269184 1.15198  
0.6449614 0.8125501 0.3745918 0.7728166 1.313631 0.173631 0.790857  
0.903219 1.048109 1.176412098 1.011996973 0.5626785 1.274766039 0.918062836  
0.291006 1.170287236 0.8059158 0.127867 0.26856427 1.13337303 0.284651882  
0.924143473 0.3331225 0.9670394 1.561022 0.7010127 1.848409 0.8249887  
0.652864756 0.519164 0.7391519 1.351957989 1.117202 0.6429853 0.548819472  
1.695941 0.2546101 0.354097934 0.9288041 0.8478589 0.319350217  
0.5838694 1.691691 0.3328377 0.81564104 1.473044 0.7366369 0.398256374  
0.7880905 0.262231634 1.387688 0.2863122 0.397242269 0.4324597  
1.321739778 0.829384 3.088243 0.199864 1.252696 0.4112072 1.100585849  
0.3151765 0.3404344 1.967595 0.9358816 0.2848302 0.1384228  
0.5261138 1.30817 1.103985076 0.408230214 1.856947 0.3410151 2.146271  
0.2968005 1.057541249 0.6488224 1.19241274 0.8556127 0.8778126  
0.233616919 0.790259522 1.458099 0.6922018 0.338541386 0.4010734  
0.3510281 0.435284 1.78158 0.7005959 0.8412239 0.7412696 0.4993822  
0.0986056 0.9542216 3.47932 0.814849 0.6178649 1.031090976 1.199224  
1.093229 0.222360382 0.3278636 0.2631254 1.22292 0.7268278 0.1718314  
2.308196958 1.600783 0.3381896 1.249439 0.1770299 1.116242 0.269512623  
0.1106512 0.8404512 0.21179 0.783908581 0.310890699 1.470754 0.3157951  
0.3941842 0.95039022 1.22957 0.8790365 0.439622666 0.7773349  
1.314059 0.3354002 3.639444 0.3417273 0.5481459 1.212444836 0.4402061  
0.569777669 1.34889 2.185828 0.7221416 0.2478843 1.102489 0.4497067  
0.3594863 0.670792425 1.411046 1.948557 0.10149039 1.057795 0.1553932  
0.7736504 0.4403802 0.9578769 0.1802465 0.5386173 1.494133  
0.955346701 0.1944707 0.305678606 0.6582151 1.486425 0.921663 1.287019952

0.909502777 0.2245804 0.8529397 1.076995 0.1116291 0.3725983  
0.429713851 0.3006914 1.357267 0.2275922 0.709582856 0.491372 0.3129322  
0.323220477 0.2348731 0.31712584 0.4095578 1.746361 0.661417658  
0.7094233 1.0347 2.33141472 0.790376046 0.1754102 0.2878544  
1.415895 1.076533 0.9684191 2.556604 0.7948828 3.119597 0.3601789  
0.633602865 0.1667711 0.269520767 0.3826109 0.214728672 2.135317  
0.3674414 0.61604664 1.39312 0.1703357 0.1293449 0.331739841  
0.4271542 0.3113985 0.222249709 0.755442481 0.2651709 0.1414524  
0.5038317 1.870916629 1.361557848 2.088710932 0.3786892 0.236169  
0.04954856 0.3470512 0.4625726 0.3009963 0.4172417 0.3745146  
1.511852 0.1502324 0.4231765 0.335762876 0.4473596 0.5844143  
0.9783646 0.3942741 2.081995 0.4432437 0.8706768 0.6273755  
0.9770925 0.5376496 1.096044925 1.739062 0.1532035 1.265786 0.3803335  
1.250762384 0.3865778 2.11687 0.782284 0.3249723 1.591367 0.236325  
0.283635 1.460925409 0.2236497 0.3994587 0.110146121 0.2088388  
2.333057 1.310701 0.4757109 0.7153876 0.643709872 1.137527567 0.6510663  
0.9580336 1.006197 0.148357919 0.696561815 0.605746344 0.4522924  
0.2781403 1.095086 0.9663847 0.6242498 0.6741052 0.3392121  
1.409416106 1.741785607 0.1266357 0.858188476 1.89685 0.332971066 1.30358  
1.068339 0.2588508 2.246264 0.9463195 0.3599751 0.9686335 0.5541411  
0.2426317 0.760649033 1.850679 0.100171 0.4058758 0.7564281 1.356296579  
0.4695321 0.3145225 0.642657 0.453648985 0.3197494 0.4621378  
0.3447888 0.3649439 1.139155 0.3376223 0.4693105 1.327315408  
1.079727136 0.84118844 0.4617541 0.325889075 0.131173795 0.540443  
0.1118536 0.920374389 0.8498181 0.3224749 0.4233324 1.987680676  
0.2561993 0.1492203 0.2697731 0.32978112 0.3196297 0.5405638  
0.2669419 0.5176658 0.3319906 1.435181 0.3188136 0.2718379  
1.689103 0.9736948 1.043073 0.194453656 0.5079438 1.833516 0.9780103  
0.552158 0.65192 0.4781426 0.2514084 0.153353705 0.174805457 0.134935554  
0.1547536 0.3540895 0.3368693 1.968781 1.553711 1.446683819 0.3210657  
2.114144 0.2853322 0.2447492 0.3061407 0.165076074 0.9596297  
2.078443 1.195904 0.5731923 0.5061506 1.999659 1.561375 1.036739401  
0.307992 0.7931806 0.350151617 0.1239813 0.7828307 0.743869 1.283558  
1.129635 1.035735068 1.15490295 0.280516478 0.2484581 1.530001 0.3590452  
0.2495276 0.5665636 0.2728753 1.037827319 0.4081545 0.239173237  
0.0543191 0.8825786 0.3297893 0.9548994 0.6499736 0.683592629  
0.5975147 0.5231135 0.2892109 0.2670996 1.408828 0.8534997  
0.7738701 0.889252299 0.6360611 0.174702676 0.1720756 0.05396882  
0.705136628 2.112892 0.2926763 0.2964414 0.564444434 0.1490093  
1.148322 2.134017 0.296998386 0.3672933 0.1622716 0.1237054 0.3290794  
0.7526805 1.215929 0.3904603  
AC007996.1 2.4657 0.900123885 0.6368586 0.496570894 0.390659599 0.650340947  
0.8596707 0.702237083 0.2829432 0.9580803 0.882259978 0.6566246  
2.938677 0.89459 1.188556 0.3791165 1.693388 0.668869394 0.7199361

0.4372294 0.578474902 0.8844336 0.89602827 0.8041435 0.4246791  
0.649473445 0.694076 0.4868082 2.082261 0.6965106 2.823849 0.577959766  
0.4977787 0.652457618 0.6077873 0.286429932 0.752070667 0.420077952  
0.5276004 0.4432065 0.629723374 0.5065884 0.493925105 4.283545  
0.541457103 2.563256 0.411879 0.3363246 0.506484441 0.4796558 0.3703676  
0.7629701 0.381921391 0.6600765 0.703885587 0.4798402 1.822073  
0.9052101 0.7459987 1.039764 1.099078 0.5770507 0.941215393 0.5457006  
0.2347667 0.246384 0.8427595 0.4035213 0.5263779 0.9641096  
0.8023201 0.631576566 0.7461352 2.130158 0.425941857 0.7357319  
1.349050006 0.6493509 3.647783 4.061146 0.8353108 0.4278154 1.139724  
0.842982187 0.898961514 0.3190744 0.7208611 1.389096 0.661634033  
0.6453289 0.94671 0.4696992 0.336970102 0.3655304 0.4280664  
0.362445754 2.707275 0.549232526 0.591969498 0.5945295 0.382250594  
0.1931434 0.4105009 0.513515644 0.7396503 0.5099921 0.483815037  
0.7394391 0.721143539 0.511674401 0.6343838 0.890071677 0.5253551  
0.6326314 1.327307 0.9386148 0.6616256 1.463092791 0.9548075  
1.055591 0.3585745 4.812671 0.286611 0.485985 0.4189326 4.899878 0.3926871  
0.4695453 0.4875129 0.991871889 0.603999547 0.4375537 0.566632466  
0.760779682 0.6449379 0.717880278 0.5495689 4.087018 0.55680153  
0.772868125 1.323044325 0.399633065 3.091933 0.4609004 0.2946496  
0.3317603 0.5388534 0.9172626 1.068626944 0.841635 0.5910795  
0.594298934 0.4487219 0.5905434 0.347518037 0.7266633 0.3872481  
0.431620402 0.5470652 1.189275 0.371446017 0.4313307 0.4362957  
0.8015761 0.670126638 0.292528 0.6755424 0.811801543 0.1734207  
0.98296151 0.7432319 0.5834807 1.017746995 0.4346989 1.245300522  
1.157329 0.4823307 0.4101348 0.7624224 0.5731648 0.434455498  
1.047758 0.372405 0.4054972 0.8680634 4.595506 0.2288658 0.7371214  
0.6062537 0.399226934 2.980713592 1.491099 0.2267309 2.819547 0.2704206  
0.495964264 0.3222976 0.438316798 0.5918565 1.155986 1.361907819  
0.926465804 0.6732273 0.5497128 0.217188457 0.2756196 0.2703552  
0.7800903 0.6372857 0.8377483 0.6613597 0.3918672 0.8751035  
0.2528129 0.5761419 0.8742112 0.9140961 2.709779 0.44298228 1.16154  
0.2041231 0.752893387 0.8861255 1.749443 0.4758504 0.4367116  
1.464688 0.548305307 0.480617 0.4212919 0.7994637 1.169327 0.8330328  
0.506802894 0.6093569 0.7157358 0.9178917 1.025849597 1.254346013  
0.3343115 0.8845659 0.5408031 0.516998068 0.418228 0.8441991  
0.968707837 1.045268 1.24715 0.3803062 1.193828 0.5163737 0.4785656  
0.451065755 0.6810795 0.574718342 0.8279072 0.449776 0.8201238  
0.9662676 0.775675 0.2972482 0.5311375 1.316446858 0.5883503  
0.4829858 0.953260324 0.5716581 0.618132 1.315135 0.4290049 0.8277899  
0.9468888 0.7560117 0.3608523 0.552964811 0.267738 0.582927033  
0.2477139 0.4105006 2.583503 0.604508091 0.516839033 18.96878 0.4966711  
0.8685064 1.269968 0.6165715 0.874920451 0.4143659 6.016048 0.5492332  
1.237457806 1.97575 0.6622913 0.501432859 0.5263179 0.780917229

0.258639 0.4281357 0.570055583 0.8311215 0.3457908 0.24604589  
1.098628455 1.285036 0.425302 0.4939375 0.6077165 0.8022867 0.2880096  
1.079207 1.383793 0.7243301 0.295623807 0.8494407 0.879389927 4.138832  
0.722646684 4.469457 0.8505294 0.563705208 0.952709 0.7610003 0.3234099  
0.490142381 0.3155581 0.6252482 0.545520858 0.539161503 3.19027  
1.686206 0.6656712 0.623565872 0.533616889 0.80062619 0.5781599  
0.7746409 1.052358 0.5408066 0.8871662 0.449079 1.311639 0.6945003  
0.5486396 0.5734144 1.003408 0.744129565 0.4119085 0.7656069  
0.7227621 0.3940686 1.884882 0.5342509 0.4002185 1.00685 0.430127  
0.3203113 0.821873754 0.414427 0.5397735 0.4245829 0.596111 0.870815068  
0.4240467 1.208107 0.5594154 0.650861 0.6829762 0.3200706 0.6080593  
0.332077392 0.5090566 0.4262529 0.268042055 0.6758875 0.6074751  
0.4710521 0.7294817 0.6730331 0.391096287 0.149271444 0.4294393  
0.7755052 2.013468 0.211368902 0.514581646 0.561399254 0.4320632  
1.021666 0.577 1.05812 0.8125227 0.5039919 0.5439665 0.89337469  
1.889892953 0.6782482 0.517388061 4.234328 1.547628901 0.3864723  
0.4178276 0.8403825 0.6921632 0.5107333 1.432846 0.3876022  
0.3772617 1.956736 0.879248551 0.3341995 1.204195 0.5441519 1.030528  
0.749431616 0.309964 1.115289 0.5459737 0.600234585 0.5729428 0.4942686  
1.306421 1.938556 0.7840484 0.4604619 0.7982182 0.70739519 0.507073151  
0.605070601 0.978619 0.475162432 0.296768505 0.6026409 1.52868 0.46744644  
0.7625807 0.338282 0.9638382 1.047864744 0.7354336 1.314956 1.060945  
0.937584022 2.855635 0.6366271 0.6826225 3.636374 0.8759158 1.390469  
0.6280586 0.2194998 0.440771 1.75646 0.7529522 0.31124533 3.452217  
0.4837502 2.669864 0.4907595 0.9250587 0.4611555 1.104836 0.431370803  
0.462739767 0.579407338 0.4458616 0.8323061 0.5176299 0.1932456  
0.9656736 0.537812828 2.230828 0.605601 0.2432167 0.4721078 0.382318  
0.685438296 1.582231 0.3655808 0.7976944 0.7424755 1.419798 0.6007436  
0.4325468 0.51788494 0.9046931 0.2587349 0.487267369 0.919888  
0.8426837 0.5048524 0.4359127 1.163925 0.870895875 0.579895051  
1.00161254 2.067965 1.049865 0.4390227 0.4159406 1.428372 1.784767  
0.536682912 0.3580575 0.554158016 0.3879037 0.7618112 3.181958  
0.4493167 1.155114 0.541072203 0.49396 0.7360905 0.5310806 0.2740535  
0.6147206 0.8597983 0.5570339 0.763986191 0.4027603 0.485090407  
0.1324167 0.7654886 0.902921495 1.4679 1.251416 0.3790292 0.681068271  
1.408105 0.7815205 0.5415439 1.188449763 0.2765542 0.6326859  
0.9234875 0.3279102 0.6699266 0.4063564 0.4373284  
RFX3-AS1 0.1315688 0.521197516 0.4077904 1.61962281 0.719936979 0.2871067  
0.4955045 0.63412638 0.2657203 0.3993023 0.172531304 2.564801  
0.6622789 1.973473 0.967461 0.666186 0.2821299 0.568465936 0.4535642  
0.3271383 0.501046878 0.3967823 2.732098769 0.8088746 0.4183516  
0.547381652 1.815434 0.2767803 0.3043261 0.9757625 1.383953 0.77281768  
0.3528774 0.49752562 0.718105 1.418649455 0.846447588 1.270328335  
1.005211 0.8425672 1.118493493 1.534376 0.377804157 0.5470875 0.617609201

1.078053 0.8213464 0.0899864 0.273472983 0.2707084 0.8537155  
0.7860067 0.484039915 0.4334945 0.383767543 1.354063 0.7278489 2.0694  
0.2363661 0.3358724 0.1260288 0.4382933 2.169334769 0.4204993  
0.3309213 0.3432655 0.6417244 0.7202928 0.4753239 0.2881121  
1.058262 0.898252898 0.2347975 0.08576344 0.759877427 0.4144106  
0.184333537 0.8944623 0.405268 0.08568344 0.7542932 0.4185146  
1.098453 0.496202973 1.562847501 0.02619337 0.3188297 0.4674063  
0.500437805 0.4661902 0.1578254 0.597262 1.01066761 0.6376492  
0.6967404 0.255696691 1.291536 0.601165931 0.39829496 0.4139686  
0.178155207 0.1162735 0.4900594 0.105388461 1.098342 0.5180933  
0.608997226 1.376914 3.986127698 0.393425792 0.2310673 0.71100316  
0.4066289 0.3596897 0.7491061 0.30821 0.7594753 1.093885103  
1.040854 0.4950773 0.3104893 0.2852878 0.7585877 0.6731856  
0.7565997 0.37065 0.1989219 1.213989 1.864497 1.43307073 1.518013761  
0.2568247 0.60536102 0.798826595 0.3143028 0.961922806 0.1890536  
0.2160914 0.069351279 2.210038339 0.458899412 0.89215637 0.9800642  
0.6555106 0.8440879 1.417537 1.282827 1.445349 0.964979709 0.9235491  
0.7625001 2.131721909 1.273485 0.7960347 0.66566161 0.9593856  
0.8892079 0.24802724 1.054993 0.7875459 0.290092179 1.498818 2.016638  
1.198983 0.803450395 0.5917081 0.6439109 0.442790377 0.3877725  
1.049598063 1.990292 0.3293052 1.048714395 0.4161838 0.779495108  
0.3995887 1.942548 0.276532 0.2563973 0.04140584 0.425944398 0.5046052  
0.1484895 0.8337355 1.567738 0.5776255 0.09673814 1.004492 1.528531  
1.534723412 0.037999215 1.651676 0.9099557 1.049528 0.5015839 1.212789503  
0.1343251 0.707067335 0.7990831 0.5092026 0.379447042 0.928289876  
0.2200129 0.3578666 0.522994995 0.4479965 0.3786555 0.6882966  
0.5838149 0.7842192 1.9255 0.3810796 0.2169249 0.06964851  
1.566905 1.160516 0.3019891 0.3026085 0.692712312 1.617766 0.625102  
0.815843372 0.2347193 0.1895715 0.6850245 1.422262 0.2821602  
1.28405942 0.3997382 0.8316385 0.8006781 0.1250423 0.5014907  
0.207031037 0.2549961 1.012302 0.2072161 1.354664384 0.478599588  
1.856601 0.3598858 0.6117792 0.910653266 2.230576 0.8544679 0.434847745  
1.643062 1.789725 0.2601666 0.8696774 0.4870141 0.3590161 1.338325378  
0.5762358 0.263142666 0.6833337 2.090683 0.9203314 0.5770078  
0.7354635 0.6947285 0.7194329 0.271200756 1.016372 0.8893846  
0.125735214 1.117671 0.1993496 0.7658215 0.3680255 0.277299 1.255853  
0.8264086 1.581345 0.98552404 0.3538095 0.18968949 0.7290567  
1.325201 0.413721 0.847963067 0.520048597 0.8656043 0.2811483 1.73307 0  
0.4672888 0.153817188 0.4860432 5.709202 0.2834072 0.931196241  
0.327791 0.1805449 0.336364501 0.1984643 0.46541567 0.2027067  
1.412417 0.637328467 0.9082607 0.9696252 0.59248439 0.693756183  
0.2535325 0.978417 0.7766169 0.9755972 1.578149 2.410698 0.7810603  
0.4321846 0.293667 1.045557878 0.1990823 0.489443425 0.316008 0.222824148  
1.10423 0.3159296 0.364260612 0.2761472 0.2489035 0.2123942

0.078106405 0.6055225 0.1597938 0.076521977 0.990818415 0.1010822  
0.6433773 0.8596477 0.301860306 1.151348893 2.287222487 0.1684141  
0.3529048 0.1817944 0.2387504 0.3679213 0.7401768 0.4500804  
0.3671064 0.7077521 0.141977 0.4188943 0.315238461 0.7266137  
0.2391135 1.539986 0.515721 8.68734 2.552228 0.5808228 0.365602 1.062543  
0.2313952 2.825703067 1.167602 0.597483 0.8124475 0.8777271 0.624280889  
0.1094051 1.466697 1.077112 0.1734295 1.385123 0.346832 0.8533047  
0.331997668 0.4274243 0.2791656 0.708844251 0.6634048 1.122625  
0.4608113 0.5096731 0.6281494 0.377242778 0.149770502 0.4963681  
2.216446 0.3519057 0.508981368 1.137223183 0.161635772 0.5722301  
1.164814 1.224704 0.3108225 0.9386267 0.3575858 0.3863423 1.520590232  
0.472035608 0.3238316 1.039697985 5.501635 0.148081883 0.5377847  
1.159855 0.4998564 1.810983 1.229858 0.1505337 1.410803 0.231946 0.4990623  
1.587938645 2.085061 1.105624 0.4512618 0.2490274 0.662031652 0.5931221  
1.216932 0.5501807 0.361344807 0.8713642 0.2392691 0.4748518  
0.3246022 1.331045 1.573115 0.1601774 1.479955466 0.73056862 1.299508309  
0.1817901 0.194514424 0.164072216 0.6802377 1.537107 0.818634327  
0.8391521 0.4044273 0.2037 4.133536537 0.6055058 0.3128523  
0.2117222 0.133330201 0.2665286 0.5853324 0.3378863 0.7633642  
0.7087 1.098655 0.4785265 0.3289447 1.592081 0.2819732 1.58251  
0.929651144 0.6438073 0.1164882 0.7441714 0.5640222 0.4305857  
0.5316096 0.1376106 0.243949146 0.602493157 0.461324963 0.2684113  
0.9448432 0.2786569 0.5510605 1.246824 0.523007481 0.2662789  
1.070701 0.2928358 0.3265411 0.2528494 0.387322738 0.630885 0.8693233  
0.62738 0.9323612 0.5872169 3.770659 0.3974461 1.488591154 0.2641622  
1.319378 0.195558578 0.3092527 0.6863479 1.25873 1.582649 0.2578011  
0.550498747 1.37232526 0.140348033 0.1546951 3.808288 0.6607357  
0.6743694 0.5519283 0.3907057 1.026952944 0.7601071 0.18856016  
0.1811796 1.028785 0.2800003 0.9818836 0.08999103 1.133535872  
0.569426 0.5428353 0.4189352 0.6038335 0.05496022 0.7098566  
0.767747 1.22158225 1.333553 0.45009716 0.1626199 0.05760359 2.123484066  
1.247554 0.4614821 0.3955082 0.502049595 0.2733586 1.761284 1.293183  
0.275174561 0.3769523 0.3608343 0.0434332 0.3675796 0.5444547  
0.357287 0.7142017

ANKRD10-IT1 2.252711 6.687336416 4.205626 7.866581605 5.538367188 7.236524365  
8.062271 6.596603619 1.636275 1.677403 3.586646711 9.315537 4.764984 20.11289  
8.795505 12.03174 7.050991 3.587451483 4.703436 8.611943 4.495989577 12.85236  
9.396791015 12.84998 9.121286 7.664555191 7.106147 1.112616 9.698138 9.893144  
3.702183 4.27202573 10.56456 8.487132444 8.55281 10.896011599 7.917532945  
10.885831657 10.77426 9.665036 7.102128207 9.415591 1.946609685 5.107275  
8.039213095 9.286316 11.9822 1.098115 3.627218346 3.224205 12.1665 8.279684  
7.348058685 6.0457 3.606035743 8.936068 3.222551 14.86905 1.89217 3.785702  
2.153124 6.370714 10.747111094 5.926773 3.08928 10.22715 2.409552 6.932585  
14.78988 4.10898 6.548442 20.920791195 1.714175 1.387469 5.989593098 7.063891

0.907602237 5.860268 4.048439 2.208319 3.646828 3.708603 9.274503 3.809288202  
11.583696706 2.454842 2.887778 7.077389 8.335302299 5.252823 2.499472 1.673178  
11.755096709 6.312934 7.920054 2.715907974 8.620181 6.338392999 3.479054073  
1.894391 2.674081813 2.598164 4.735136 4.444652959 11.57264 4.720694 4.342679787  
8.308201 16.362100423 9.807487418 1.955022 11.669210555 5.601708 8.551464  
10.88846 3.460235 11.07214 13.064504189 10.131 8.714174 2.026542 1.596804  
2.631206 9.666626 6.413931 13.8708 5.657059 10.80584 15.1179 10.259592199  
10.142868302 5.072362 5.459563669 12.436079177 3.014234 13.854790257 8.420713  
1.732086 6.296489305 9.254753639 4.124694731 11.097498006 5.473716 7.47615  
5.642888 5.963482 10.12684 9.073959 8.220111332 7.212918 13.29978 8.033312026  
14.94714 7.424221 4.697502663 24.05118 6.398501 5.050277519 9.318479 4.808755  
3.911734393 9.626454 14.75905 2.4624 16.163947255 6.416097 8.866822 2.40152281  
1.397771 15.66100735 13.08151 1.82603 4.183299171 6.297641 17.540013636  
5.971507 33.99937 1.388388 2.688492 2.162601 6.653251494 5.665139 1.671337  
25.40795 9.616443 5.312596 0.7726959 11.95666 19.19789 12.147078304 0.816128148  
16.75545 3.864297 17.05139 2.448357 10.462410047 6.49846 14.45074631 9.543621  
7.025808 4.127706235 10.472141231 4.544453 2.952717 5.709144116 5.0296  
2.607093 8.65135 13.67878 8.336468 11.2183 10.15107 3.902672 1.05769 13.40869  
17.41587 1.965446 3.830293 8.572314867 10.17028 6.008673 4.175418392 3.291351  
4.386826 7.149601 7.321094 2.513563 9.731048439 14.2718 4.387645 3.613585  
0.1627634 5.103504 1.893489521 1.677069 7.358734 3.880381 13.069323863  
3.114885655 10.35928 3.46197 8.738702 9.835545183 10.85343 6.395336 5.252202304  
6.370652 11.24401 1.869349 12.13395 3.095467 6.828054 14.496915057 7.313152  
1.826794865 3.817687 23.58234 12.12939 2.33565 6.051683 3.144515 4.812373  
9.425446659 15.15411 14.72705 0.679840628 17.99433 1.447936 7.996426 7.311763  
3.884145 5.477992 4.840688 11.86377 7.95350751 1.58887 4.296277265 10.48201  
9.31846 7.202796 11.486057226 8.461624051 85.21966 6.691864 12.31453 9.654357  
6.289608 3.631239255 4.262965 62.95477 3.537503 9.57564615 3.931502 1.233799  
4.984576911 1.590796 5.369733288 0.9464418 15.76141 7.418442079 6.533502  
11.90466 6.94095469 10.403012713 2.741661 2.481682 6.762077 13.25461 13.64077  
10.07782 7.737029 7.83304 5.082275 5.690003831 0.7545513 2.457355597  
5.766629 3.480513187 12.63421 1.91437 4.30378583 2.260398 2.556699 2.876979  
2.872135243 2.967298 2.766377 2.577307997 10.373313609 0.6907703 5.058275  
6.625508 10.178178051 12.072639389 15.912627479 2.236034 2.633142 9.486939  
2.330801 3.684524 4.197216 2.428214 3.643607 12.7479 3.571118 4.871786 5.247973757  
5.455291 4.201822 11.05365 4.551392 66.46564 8.69026 6.917745 5.109577 6.363315  
5.28605 10.454744011 20.02081 2.148973 10.72983 4.056797 12.72821693 1.403746  
22.36546 12.87921 3.066402 11.56795 1.456983 3.882685 8.594214801 3.401168  
2.725354 2.649888889 2.746032 12.35449 16.14907 6.796972 9.09493 3.087310753  
8.148963108 8.641665 13.59348 8.2706 1.794336051 10.338122996 4.647836632  
5.403569 4.528471 8.285416 8.563765 13.96442 2.940845 2.7156 15.071399725  
10.209040888 2.529125 11.049423238 63.96826 4.589936783 12.06411 12.68731  
5.181512 23.46866 12.77286 3.932889 11.77536 0.6793118 4.924767 9.720960414  
18.28416 15.06367 4.033428 6.551257 11.777175292 4.840476 4.233211 11.7328

2.29295864 7.035744 3.521766 2.636578 3.915891 12.6257 2.909136 1.5353  
9.286277827 11.311028665 13.176608161 3.312821 4.780878488 0.98240974  
15.75203 19.98858 12.40412213 7.766977 4.502653 2.747913 14.92598878 2.726803  
2.776564 2.914382 2.863599389 2.471886 5.326551 1.996999 4.802621 4.472435  
9.683704 4.688917 3.557157 8.165383 9.103782 10.07695 2.406120929 6.08669  
8.728134 6.807181 4.899453 2.505342 2.646818 1.712865 0.829702524 2.39068313  
2.855995337 2.156763 7.7985 2.123657 6.312215 13.60589 12.61876961 5.086071  
9.081498 2.415694 2.656548 2.943142 1.838719768 4.818523 7.412494 5.535002  
5.031765 7.739152 23.21527 7.358749 9.799705138 3.896979 14.1148 4.794064226  
1.755279 8.79801 12.52467 9.77746 6.350037 10.858166479 14.102447739 1.857311287  
0.3451911 16.21042 3.096207 2.683414 12.22887 3.034074 8.763976041 5.050401  
1.302733136 1.93385 5.130661 10.41335 7.098126 1.533447 13.88991862 2.70539  
3.460852 7.727673 4.986526 1.5238 13.6867 6.254557 7.824629785 9.113165  
4.833480872 1.512867 0.1968243 9.866674635 26.46644 3.812109 4.276965  
7.61328924 1.69824 12.69569 15.4467 5.243836506 5.519995 2.982506 0.6784266  
1.37559 5.008137 11.67071 3.806107  
AC087500.1 0.2526472 1.301089872 0.3579732 1.069260322 0.883201591  
0.961829294 0.7932195 0.600575925 0.276995 0.4142534 0.456033185  
0.8261463 0.6923709 1.090475 1.5382 1.08229 0.6036808 0.709544126  
0.6110576 0.5551615 0.631096119 0.6458246 1.184178166 1.094843  
1.034405 0.769676448 0.628924 0.7083583 0.4496204 1.551225 0.9715487  
0.909132031 0.9108673 0.943170355 0.6219361 1.554097391 0.77220253  
1.642218405 0.9410079 1.524922 1.025686988 1.712945 0.37425805 1.02429  
0.873667907 1.809206 2.652764 0.3369559 0.396830786 0.3861612 1.161315  
1.86871 1.018450924 0.9386019 0.49611593 2.008811 0.7384842 1.409564  
0.3146943 1.306682 0.674168 1.556099 2.320891034 0.4686215 0.3687922  
1.233225 0.545725 0.9549577 1.384937 0.2501662 0.9173684 1.235581139  
0.4223092 0.3320662 1.057188733 0.7741251 0.22293489 1.446061  
0.5781084 0.3666782 0.7301342 0.3788682 1.778672 0.498695317  
1.385243951 0.4296908 0.5811404 2.054671 0.626454303 0.5264685  
1.282021 0.6791183 1.37969254 1.123619 1.027926 0.474171416 1.071574  
1.243452711 0.441072662 0.6920151 0.333552916 0.3317246 0.3405686  
0.315703407 1.340927 0.5173363 0.141639915 1.212801 2.21440726 0.50248374  
0.3158798 1.109778488 0.5961621 1.456275 0.29683 0.5587303 0.6572501  
1.296963838 1.030469 1.080411 0.4239263 0.6240031 0.5155952 0.8751997  
0.8470278 0.5727868 0.7710841 1.68717 1.514537 1.813057271 1.289460054  
0.6481689 0.935499306 1.12431986 0.4153812 1.491486423 0.5646465  
0.2514679 0.065952327 1.700736305 0.417597743 1.029556965 0.7803047  
0.8682843 2.38198 0.6879287 1.530202 0.6264602 0.974533191 0.6655756  
1.06594 0.69110619 1.290204 0.5622531 0.481560365 0.6842741 0.6057162  
0.530710342 1.122726 1.562577 0.659512648 1.076053 1.000178 0.6081173  
1.18963228 1.235948 0.9507576 0.378980038 0.4946449 0.637711145  
1.345281 0.4227737 1.150130798 0.5869332 1.166622756 1.293477 2.696458  
0.3028955 0.3792928 0.2067267 1.047315484 0.4273879 0.5170848



1.91254 1.583259 0.1951516 0.2132656 1.337941 0.5567042 1.292984839  
0.153581608 0.9731676 0.608455 0.3511797 0.724916 1.226847683 0.9154822  
1.496485485 0.836405 0.6053078 0.401123542 0.801053616 0.1899587  
0.5187247 0.822343957 0.5858048 0.7960047 0.782407 1.77268 0.8983308  
1.358659 0.6212616 0.3094399 0.2373421 0.9342288 1.53996 0.6677131  
0.372126 1.349998242 2.491574 0.8231059 0.52017776 0.5783311 0.4657247  
1.332513 0.6363161 0.7106588 1.544518466 1.482572 0.9086699 1.310669  
0.1288234 1.506609 0.365272208 0.5934834 0.4332098 0.571027 1.499036386  
0.295843021 1.614885 0.3944194 0.6966235 1.134597858 0.9427795  
1.135236 0.692431656 1.255014 1.580437 0.3414336 1.518419 0.6873272  
0.4931629 1.19526246 0.7429535 0.636041591 0.4053477 2.279484  
0.8718065 0.5169421 0.9741893 0.6193869 0.5511394 0.567399864  
1.886438 1.476075 0.324226378 0.6350336 0.3014311 0.9420249 0.7091869  
0.7051334 1.210185 0.7090237 1.825117 1.349600921 0.2944104 0.575001681  
1.536346 1.302114 0.5163956 1.058405043 0.570646933 0.2374559 1.098123  
1.728973 0.3611687 0.588576 0.468756123 0.4457139 4.054105 0.4764679  
0.730585106 0.4074701 0.1368205 0.59054595 0.2533055 0.653848802  
0.3708763 1.919198 0.847946834 1.452457 0.873263 3.06373951 1.306314382  
0.38948 0.7239359 1.122802 0.7538233 1.151932 1.683738 1.29305 2.01034  
0.5045977 0.936136431 0.3341033 0.520075259 0.4334426 0.658414106  
1.03961 0.5205998 0.546258708 0.5681532 0.4399618 0.2367007  
0.241404667 0.3726059 0.2887282 0.375228482 1.291542959 0.273965  
0.5628973 0.8390294 0.894320798 1.119252098 2.109495468 0.6966959  
0.5663397 0.1650261 0.273491 0.4994387 0.5897037 0.6673759  
0.5091249 1.224136 0.2740083 0.4611496 0.74552646 0.4812335 1.1345  
1.129765 0.8165911 2.874715 1.465165 0.7548869 0.5009389 1.553911  
0.5693907 1.364518922 1.249174 0.6728684 0.6641136 0.5869049  
1.233036984 0.6799961 1.867436 2.084376 0.302371 1.348486 0.4047957  
0.5292285 0.588167441 0.316361 0.6214728 0.474749602 0.5110217  
1.273846 0.9607277 0.4526857 0.6458507 0.675525891 0.38456141  
0.7818175 1.949407 0.8738308 0.524372179 1.543735662 0.534505143  
0.9053255 0.639638 0.6283143 0.4269618 1.40494 0.3477889 0.3227937  
2.19393466 1.346702502 0.3514766 1.257829639 2.864518 0.56769793  
1.175195 1.245869 0.9139841 1.726036 1.003165 0.5930744 0.9063874  
0.5066405 0.5483588 1.311413689 1.813283 0.2946333 0.4005355  
0.7478604 1.605441871 0.7747804 0.3791121 1.192525 0.451021018  
0.5308591 0.8401566 0.4233553 0.3307428 1.185013 0.7562455  
0.591998 1.497641231 1.181586326 1.895858013 0.3673709 0.448851307  
0.444688149 0.4948776 0.2767433 0.99138704 0.8452361 0.4787118  
0.4094463 1.305382982 0.5363574 0.4665642 0.2114128 0.370877131  
0.7984174 0.7902369 0.6057434 0.5185366 0.6047643 1.410493  
0.7458151 0.240633 1.271483 1.853132 0.8791479 0.416343924 0.5014843  
1.775927 0.6761919 0.919507 0.6449349 0.518194 0.4600765 0.432180581  
0.596067983 0.553744091 0.5964162 0.7862189 0.4872575 0.7074711

0.7583493 1.216791291 0.4541595 1.051071 0.4438335 0.3622933  
0.2427691 0.287088371 1.383007 1.451987 1.209836 0.9638752 0.5863589  
2.499105 3.040028 0.958371912 1.074644 0.8038015 0.340952561 0.5232173  
0.9790643 0.8977793 1.250376 1.294194 1.322151169 1.408098283 0.845306731  
0.5437942 1.467455 0.5478449 0.5723155 0.8900104 0.6966693  
0.822995485 0.5583236 0.475884251 0.3187547 1.069717 0.3328467  
0.9260438 0.2450715 0.957172374 0.9882704 0.7901489 0.912133  
1.044927 0.8702386 0.7278056 1.114061 0.846210864 0.6629197 0.326760849  
0.2183291 0.3389537 0.760474291 2.746427 0.8355306 0.4122899  
1.414427303 0.6144535 1.652018 2.123737 0.439635967 0.7931317 0.2916772  
0.1115222 0.320434 1.656866 1.026216 0.8569883  
AC006064.3 0.265132 0.487637329 0.4108812 1.665615529 1.08446356 0.655269379  
0.7211535 1.055286372 0.468535 0.2377398 0.099701775 0.6622696  
1.218049 1.526831 1.089027 1.151355 0.3695488 0.764551783 0.5941026  
0.1477597 0.59346085 0.4664212 1.307583088 2.016675 1.872262 1.126697999  
1.641919 0.5331493 2.349025 1.539886 0.03568455 0.525858571 1.403161  
1.672087926 0.9742054 2.155948871 2.288350895 1.242180191 0.4457505  
2.069324 0.800244133 1.810075 0.412390003 0.3079159 0.539318279 3.447163  
2.791103 0.5156768 0.833763436 0.576206 1.441034 1.747699 1.109537197  
0.9125585 0.785436193 5.054826 0.6042519 1.694131 0.2322037 0.3499551  
1.547618 1.945561 3.127781747 0.8175823 0.06772787 2.456298 0.3771765  
1.054475 1.82145 0.4922407 1.332853 0.51358628 0.1671469 0.3209644  
0.675839943 1.055478 0.052489105 2.766312 1.296241 0.5050473 0.2940516  
0.4743976 1.101793 0.110787456 2.484345726 1.072171 0.145007 0.2811277  
0.969872576 0.4134547 0.9187917 0.6802831 0.889668181 1.793281  
2.125297 1.60764068 1.035749 1.968597872 0.892395175 1.228508 0.255234411  
0.3384472 0.452626 0 1.652523 1.319551 0.476884074 1.65688 2.886330324  
0.119844198 1.355683 1.282238129 0.9986703 5.127119 0.654146 0.7149029  
1.061121 1.488653462 2.797952 1.548606 0.5228942 0.8407917 0.4968193  
1.3115 1.756264 0.5562987 1.557687 3.449218 2.628776 1.396660976 1.273959022  
0.5822354 2.029533707 1.325371108 0.8173269 2.373871053 1.19947 0  
0.037849999 2.047327527 0.15545454 0.754990454 0.2612262 1.226604  
3.845674 1.674917 2.498744 0.5097065 1.705816156 0.6615622 2.130695  
0.781046957 3.41198 0.6580074 0.435959512 1.659732 0.7852125 0.386761056  
1.699939 2.203808 0.47497273 1.71137 2.886407 0.5525804 1.765104805 2.17983  
2.219549 0.193330138 1.489588 1.145682862 3.296631 0.6901464 0.553895951  
0.5575293 2.092262706 2.264723 2.538748 0.5497927 0.6841243 0.5423557  
1.541633911 0.5852239 0.2860286 1.254406 1.499242 0.3982129 0.3455803  
1.941901 1.561962 1.315440193 0.04147783 1.881264 0.5959542 1.145606  
0.5186853 1.894870389 0.9774785 1.786874069 2.310856 1.167216 0.310637463  
0.975741088 0.2654332 1.134079 0.778462152 0.5705094 0.6199789  
1.091742 1.365557 0.9857085 1.247574 0.7427951 0 0.2534148 0.6814659  
2.96067 1.318538 0.4442108 1.341857813 1.047875 0.2624333 0.445264622  
0.3843097 0.4368433 1.18278 0.9738172 0.8084748 2.138045852

2.206593 1.04297 2.106138 0 1.791489 0.285452923 0.0878967 1.121972  
0.3701219 1.533039387 0.417930151 2.718559 0.4599001 0.3163188  
0.86819333 0.9275324 1.289306 0.298039569 5.418584 1.594746 0.4089361  
0.5043111 0.4750445 0.2612547 1.562465297 0.7983296 0.191487931  
0.7754292 5.014746 1.318515 0.3686807 0.2867111 0.8531178 0.4362738  
0.917685743 1.92887 1.848259 0.126688214 0.4652494 0.4961255 1.308409  
1.184006 1.618702 1.04999 0.7451814 3.012843 1.16180268 0.5792981  
0.341639918 2.929983 2.245641 0.6021264 1.700770368 0.48032441 0.7631444  
0.6137716 2.226965 0 0.2604595 0.412113974 0.8084384 2.223699  
0.4308824 0.406576808 0.3680213 0.9607297 0.762556386 0.3078463  
0.785124687 0.404046 3.038417 1.204048217 1.69061 1.103236 0 2.589848553  
0.6386353 1.077967 1.683968 1.286763 0.9368636 2.653221 1.50176 2.153635  
0.1748458 0.655624811 0.3834833 0.327091358 0.5970059 0.590683081  
1.193263 0.7134851 0.58111737 0.6956006 0.389815 0.1738783 0.298398126  
0.1943984 0.3139596 0.093968025 1.454460981 0.0331007 0.5337289  
0.952454 1.74885234 2.876557466 3.40054797 0.8272414 0.2889084  
0.05411908 0.2842982 0.8938893 0.2578519 0.4266403 0.4341056  
1.332636 0.355529 0.7455027 0.760634962 0.4532178 0.8510968 0.984564  
0.4053113 3.210416 0.9172988 0.824192 0.3465615 2.046728 1.212375  
2.592319618 1.078414 0.3604148 1.225609 0.6511937 1.022145438 0.6141629  
3.92964 2.70688 0.220857 1.191881 0.757165 0.2429791 0.666330344 0.2376777  
0.941867 0.283073764 0.3475852 2.339391 1.818524 0.6298085 1.415829  
1.025062473 0.752013287 1.828601 3.206009 0.512161 0.416681811 2.602787804  
1.539775575 1.056166 1.451474 1.26646 0.5277636 1.298729 0.1064511  
0.6144914 2.052566851 2.080808474 0.2766339 1.551476716 4.053563  
0.666756528 2.023331 2.10497 1.279716 3.096354 0.8140356 0.4225221  
1.340112 0.1898845 0.04416881 1.407496191 1.497327 0.1989292 0.7552776  
1.373429 3.757712012 1.811319 0.137414 1.146498 0.354981502 0.7133496  
0.9643307 0.5345194 0.4555514 0.8964671 1.134664 0.4291545  
1.284065358 3.066243979 2.5145622 0.2315039 0.599494942 0.250728947  
0.7573598 0.04886855 0.949424175 1.405422 0.8171528 0.4244817  
2.120067514 0.6396159 0.04656711 0.4159875 0.436607492 0.2181958  
1.74561 0.5382748 0.317427 0.6216248 0.8223298 0.5513514 0.3038181  
2.349737 0.7254962 1.041636 0.353984468 0.2496591 0.5245022 0.9346969  
0.9423294 0.7050052 0.5512617 0.5632802 0.489614037 0.477325173  
0.589529758 0.9465601 1.171975 1.030241 1.263165 0.9768882 1.467992248  
0.834054 4.033959 0.5274114 0.3564341 0.1910744 0.348171729 0.1822868  
1.72965 2.231983 2.744396 0.8332654 2.708301 4.577655 0.905897238 1.281532  
0.27003 0.426921732 0.7536291 1.905521 1.109737 3.109556 1.233836 1.397997844  
1.695053118 0.306392211 0.1085507 1.47958 0.4597792 0.3074865  
1.964525 0.5815535 0.755706546 0.5944052 0.33248134 0.1977656  
0.6900142 0.4802801 2.178969 0.1339489 0.725316551 0.3729322  
0.4716046 0.6137264 0.8103824 0.5759186 1.259115 1.762753 2.388628755  
0.3308254 0.55271365 0.2505979 0 0.733505407 6.834992 0.5812249

0.6475722 2.000234349 0.406886 2.804772 2.419829 0.648788927 0.6480497  
0.6301867 0 0.5684084 1.307452 1.644302 0.3576909  
AC048341.1 0.3127875 1.266521984 0.3100043 0.606094586 0.716664011  
0.497127579 0.7201912 0.461375244 0.1248739 0.2152457 0.29542371  
0.4988475 0.2999489 1.291769 0.454514 0.733184 0.2757779 0.379394564  
0.2988282 0.6911926 0.231780674 0.744035 1.046030053 1.149527 0.5687972  
0.663201569 0.6384314 0.1901564 0.5448747 0.8069391 0.2819626  
0.461676362 0.8982618 1.223338227 0.3981576 0.642203567 0.880729034  
0.795735182 0.6867363 0.8478205 0.472885374 1.065143 0.233828405  
0.3041258 0.680646594 0.8910647 4.154614 0.7114443 0.376167053  
0.1434945 0.8381633 2.578819 0.641437802 0.6342665 0.23704036  
1.002414 0.3831401 1.115519 0.2392556 0.408742 0.1500262 0.9363051  
0.986126948 0.4722333 0.1486538 0.4500326 0.243921 0.6745361  
0.8995149 0.2520943 0.3452018 1.232294482 0.1485806 0.2641781  
0.571438599 0.3049449 0.05904345 1.40899 0.5063565 0.9268399  
0.5001888 0.09544706 0.6187981 0.385009669 1.984824478 0.4588886  
0.1607271 0.3513692 0.50465906 0.5340165 0.2000873 0.1197617  
1.144285422 0.5620958 1.145608 2.534315708 0.2699583 1.685117967  
0.553706849 0.1789862 0.170062599 0.3505311 0.4357655 0.261326529  
1.022337 0.4323676 0.421058171 0.8495419 1.193744289 0.705282349  
0.1245578 1.371993323 0.2435501 1.902806 1.253303 0.1730646 0.5731579  
0.487557341 0.6141139 1.455191 0.3395233 0.2870666 0.2710098  
0.5297795 0.8346265 0.2386506 1.066081 0.8516906 1.228413 1.075986459  
1.110245447 0.5661943 1.654921395 1.167434267 0.1411886 0.971928252  
0.8810984 0.2207085 0.19315125 1.042414552 0.292865408 0.486324432  
0.3132989 0.6319274 0.5901932 0.7851364 1.033296 0.5134214  
0.747274304 0.4736425 1.552776 0.934827088 0.8658983 0.57353 0.211879289  
0.7643575 0.4164977 0.481745086 0.8364987 0.4116655 0.351844805  
0.7335285 0.9430937 0.3303398 1.101946828 0.5923596 0.5805348  
0.275817367 0.1782119 0.779999203 0.7630725 0.2130161 0.387007158  
0.3025268 2.57165634 0.6572463 2.191323 0.2466684 0.5579674 0.3348  
0.61832818 0.2040072 0.2228674 1.619563 0.9473054 0.207581 0.1153558  
1.000317 1.028491 0.781029883 0.068278816 1.238739 0.2881779 4.805404  
0.1849976 0.668002659 1.016401 0.918345162 0.5519558 1.436487 0.281246078  
0.792812839 0.1602126 0.2841786 0.527537285 0.6976507 0.2345543  
0.3729618 1.738387 0.9266049 0.617959 0.8934253 0.2255162 0.4964196  
1.187785 2.337443 0.1284221 0.4031187 0.713510416 0.9279656 0.5414464  
0.302073837 0.4102524 0.4554366 0.9489004 0.6574833 0.2455777  
1.378489876 1.502208 0.3576849 0.3584949 0.009985868 0.4232452  
0.15271715 0.161572 1.085775 0.1472419 0.674754057 0.229325528 0.5980443  
0.2854768 0.5515656 0.737373127 1.259659 0.7420853 0.490618455  
0.7579748 0.7547435 0.2281302 0.5843765 0.2588033 0.2628174  
1.139650604 0.4519955 0.120833665 0.5944724 1.320806 0.9741301  
0.2680495 1.066652 0.2709425 0.4692064 0.279389086 0.7720127

1.075637 0.262422984 0.612697 0.1948613 0.3270647 0.3677678 0.8362173  
0.3528903 0.2969861 1.162406 0.585556748 0.1356249 0.397082315  
0.5001834 0.4928888 0.5823251 0.902769009 0.979972706 1.447681  
0.5917831 0.6642022 0.246203 0.3412182 0.236184496 0.2855702  
2.734112 0.1491345 0.644188984 0.3163721 0.2939981 0.300648214  
0.1914434 0.283828782 0.4640012 0.7743368 0.748773112 0.4500902  
0.4724798 0.98475909 0.670657047 0.1191463 0.2957495 0.5694996  
1.034757 0.8490501 1.022702 1.142071 0.940325 0.3381917 0.571607091  
0.06733566 0.245888567 0.4214959 0.116301186 1.456354 0.2916688  
0.466555971 1.02865 0.2002865 0.3506319 0.175431676 0.2922752  
0.1646184 0.128904716 0.518757192 0.06538655 0.2404587 0.378615  
2.820464916 0.671210342 1.693517424 0.4993139 0.2264701 0.8463382  
0.2716989 0.236716 0.2886351 0.2362332 0.155747 1.033275 0.2656156  
0.4728853 0.262349125 0.7009906 0.4147063 0.8802079 0.1649476  
3.616196 0.4921525 0.4348543 0.3509396 0.3128567 1.598682 0.772469795  
0.5594673 0.2966488 0.7971736 0.2513571 1.876753778 0.4072105  
5.75221 0.5116074 0.1575445 1.504213 0.1189754 0.1906574 0.633112062  
0.2260577 0.2112877 0.501707787 0.1335082 1.114037 1.063672 0.2799254  
0.5716736 0.438437821 1.191281662 1.016392 0.8722664 0.6416889  
0.238802345 1.063455857 0.554466666 0.252379 0.4463818 0.5945498  
0.6267621 1.000064 0.2667462 0.2697457 0.917708865 1.314673197  
0.3086474 0.631397303 3.86527 0.515531241 2.245146 1.099793 0.2874131  
1.192196 1.160181 0.3967129 0.9501404 0.1927569 0.2157021 0.705812467  
1.252132 0.3100028 0.2883019 0.4121383 0.790403361 0.3352922  
0.1834769 0.8820287 0.282437543 0.399582 0.2943369 0.2959664  
0.2937135 0.5851997 0.4022058 0.5965608 0.820505199 2.172460467  
0.872978678 0.2413574 0.226155381 0.137579325 0.6429213 0.4344034  
0.882576891 0.9023952 0.3819011 0.4159295 0.975397271 0.1947874  
0.1226505 0.2054336 0.182076324 0.2035373 0.2234976 0.2100343  
0.3701277 0.3160826 0.5555728 0.3089053 0.810818 1.525049 0.3745687  
0.8001893 0.244739152 0.07915111 0.7142759 0.7748218 0.5046628  
0.5524198 0.2483577 0.1684495 0.084839912 0.211279397 0.234526779  
0.2504221 1.067518 0.287501 0.9340623 0.8260444 2.391925594 0.2766762  
0.738524 0.2380971 0.2607755 0.263862 0.200600265 0.4401052 1.504701  
0.4982416 0.5421233 0.6999093 1.629907 0.5836332 0.852139782  
0.1968957 1.044599 0.333819595 0.1809191 0.7882158 0.7017215  
0.950843 0.3723651 0.575329263 0.901985614 0.280204542 0.06552 0.7031385  
0.4110824 0.200934 0.4786181 0.3270862 0.659324187 0.2894674  
0.492583363 0.2278865 0.5055728 0.3138498 0.5876125 0.0779101  
0.704683109 0.511586 0.3602981 0.5586293 0.3432859 0.4918007  
0.892853 0.6564635 0.52901023 0.8295905 0.257068934 0.08250444  
0.06727819 0.842003117 2.153292 0.6697492 0.1503337 0.490144711  
0.1875429 0.9190809 0.8376871 0.431157671 0.3014101 0.2096378  
0.1076991 0.2385084 0.4456711 0.9438995 0.2506233

ZNF213-AS1 1.302898 2.425906399 1.017044 2.03589949 2.389135917 1.767161017  
1.795553 2.448556166 0.7211909 1.188481 1.374277573 1.54287 1.622133 2.6781  
4.310144 2.717571 1.603476 1.785993696 1.14858 1.124131 1.230079001 1.232136  
4.910053902 2.300885 1.801883 1.976083092 1.974394 1.040227 2.477115 2.348644  
0.815745 1.722764686 1.838757 2.877861671 1.775553 3.008358144 3.346018107  
3.112593092 1.912149 4.464301 1.832934496 3.389862 1.38605715 2.506623  
1.914098356 3.265518 4.411253 2.810317 1.704090978 1.032592 1.879995 7.111353  
1.771318655 2.00047 2.109996653 3.641287 2.233759 3.113013 0.8302204  
1.579605 1.044075 4.458211 4.77031865 1.246825 0.6557881 1.570013 1.023839  
2.787895 4.281953 0.5255977 1.443876 3.130580303 0.8615412 0.8295253  
2.692725928 1.671686 3.389512795 2.165573 1.685164 4.14259 1.5756 0.8442423  
3.298167 0.661376765 3.841590206 1.423749 1.228815 3.656719 1.733569132  
1.403142 1.015893 1.143228 2.264352169 2.235528 2.548434 1.565406988 1.482961  
2.379082978 1.984032848 1.227461 0.690174684 0.5420734 1.785408 1.015036288  
3.297836 1.685276 0.789050197 2.2187 4.315530135 1.631560232 1.317487  
3.645553548 1.265612 3.974774 3.174884 1.689981 1.361566 2.485903029 3.022123  
3.262469 1.311226 1.496281 1.174446 1.682074 2.835749 1.958716 2.049502 3.387866  
4.296805 5.889304943 2.593279329 1.314028 3.085664045 2.473189247 1.877656  
2.439463539 1.149297 0.9001794 0.518045868 4.693340085 1.101563395  
2.059991275 1.151938 1.567702 2.979093 3.288832 4.091748 2.141647 1.795624257  
1.279765 1.711159 1.798258695 3.056695 1.953025 1.115392487 3.348777 1.605389  
1.469798264 2.706736 3.379524 1.741920077 2.07339 2.311504 2.032626 1.711763726  
1.990003 2.224529 1.154138435 1.258676 1.439564271 2.681401 0.6782963  
1.924839153 1.727303 3.290140585 3.114339 7.135547 0.7440149 1.136477  
1.233896 2.030907049 0.8571241 0.8954109 4.045095 2.890771 1.166879 1.00636  
2.839034 3.183999 2.42609574 0.32008578 3.475364 1.437187 2.570037 1.705558  
2.532246256 2.889201 2.660398562 2.449309 2.50072 1.169523228 1.775902393  
1.060066 0.8751726 1.46785027 1.590172 1.534618 2.512632 2.497318 1.714728  
3.205916 1.496855 0.7535614 0.4317102 2.340529 4.941411 1.78066 1.009988  
2.567856631 3.165936 2.353825 0.772095971 2.802946 2.524166 3.064293 3.156414  
1.706903 4.970565022 4.400035 1.936228 2.797517 1.020169 1.869415 1.709286613  
1.894126 4.017271 1.720033 2.246420645 0.958426355 2.544134 1.16349 1.990703  
1.720312846 3.151232 2.851878 1.547786076 2.96697 3.099897 0.7988672  
2.073315 1.427837 1.344074 3.085146567 2.007787 1.373163112 1.616167 5.028643  
2.47519 1.623866 3.272917 1.336281 1.441981 1.754289185 4.664346 3.718675  
1.614056573 1.350331 0.7489945 1.958021 1.483841 1.89127 2.00022 1.461917  
5.652615 2.775535726 1.057166 1.442583941 4.439991 2.204873 1.446592 1.799177803  
1.443252491 1.238163 1.634155 3.038592 1.562263 1.31312 0.953422409 0.8901984  
3.621543 0.9700318 2.168176939 1.786184 0.8177978 1.056855976 0.7321217  
1.855979948 1.143 2.787164 1.531081826 3.437126 1.531919 9.03990842  
3.261526549 1.543602 1.469289 2.542003 1.808978 1.78655 2.985638 2.453125  
4.184036 0.7510202 1.707706506 0.9101407 1.471641529 1.454573 1.239498998  
2.232351 1.179113 1.781331442 2.213023 0.7275443 0.9430747 1.216546204  
0.9001075 1.208879 0.779882974 2.61461799 1.084412 1.877389 1.99085

2.778903808 4.456776648 5.057895299 1.29283 1.304056 0.1733595 1.100419  
1.8165 1.103804 2.066925 1.546157 1.417319 0.533594 1.56744 1.455595006  
1.315686 2.775885 1.776226 1.957334 3.674682 2.597053 0.8708126 1.078028  
2.626769 1.919732 2.684111155 4.075429 2.369006 2.106628 1.186843 2.884990379  
2.049319 4.143919 3.786071 0.8544774 3.504607 1.24779 1.01891 1.756583984  
0.8459469 1.032583 1.195286745 1.474014 2.40871 2.309827 1.008732 1.602531  
1.396860632 1.271110848 2.115227 3.027775 2.464013 1.017919578 2.658671836  
2.003770447 1.651921 2.079005 1.849143 1.729006 2.823903 1.162481 1.278933  
3.663836007 4.059863126 1.356063 2.359419109 4.013473 0.944349717 2.951515  
3.104906 1.412659 3.652591 2.329994 2.392486 3.240123 1.133569 0.9968318  
2.049376323 3.941754 0.5850924 0.8271787 1.474833 2.812857615 1.264661  
1.320534 1.88739 2.1579267 1.48443 1.342678 1.436287 1.315551 2.03446  
1.414215 3.3604 4.499235744 4.449867598 3.17548501 1.136441 1.811248797  
1.084786462 2.400101 0.3771202 2.374481017 2.141039 1.017493 1.71292  
2.991929598 1.625134 1.220468 0.8782593 1.385868946 2.808492 2.063251  
1.101607 1.380786 1.460249 4.751976 1.259116 0.4825881 4.69897 2.904975 1.63421  
1.360700737 0.928982 2.881225 1.414426 2.436802 0.9320788 2.129165 0.8447656  
2.536421591 1.501213896 1.765046428 1.393 2.470936 2.091534 2.872692  
1.911111 1.941527293 0.8721739 4.94043 1.42766 0.9860691 1.330784  
0.695250296 2.172 4.611904 1.661863 1.968011 2.669196 5.440204 5.24073  
1.758701597 2.122538 1.54649 1.134450674 1.207049 2.760294 2.165976 3.912354  
1.872163 3.064032869 2.674701118 1.628339926 1.001012 2.919891 1.283786  
1.424544 3.381033 1.968734 2.206185606 2.282704 1.037373098 0.7832385  
2.535367 1.964422 3.052733 0.8659577 1.857480832 2.217273 3.095329 1.261571  
1.382904 2.201227 2.101274 2.617137 2.681791585 1.661852 0.892917434 0.7480071  
0.6111062 1.738730235 5.885436 2.200351 1.051689 3.020149117 1.560102  
3.232585 3.036323 1.233312896 1.464809 1.290346 0.6999639 1.251178 2.238299  
2.062674 1.286009

AC066613.1 0.2127826 0.199514323 0.2327676 0.794597932 0.338341879  
0.451914583 0.4766294 0.3342697 0.1516737 0.1047523 0.389097424  
0.9891142 0.1907413 1.193514 0.7727368 1.075644 0.6001438 0.276195615  
0.2867027 0.5999009 0.263686671 0.6417051 1.29957314 1.091308  
0.7415942 0.599599918 0.5238836 0.4832536 0.2285113 1.26492  
0.3099725 0.310315888 0.5922801 0.518154782 0.4186793 1.192282889  
0.486899458 1.025555164 0.8546876 1.015984 0.674205317 1.261152 0.090853142  
0.158579 0.572865541 0.2823393 0.7091366 0 0.163275922 0.2510965  
0.4462754 0.4560396 0.74828815 0.3829422 0.26697368 1.071757  
0.1521394 0.8573672 0.09744099 0.3209802 0.09741541 0.3493236  
0.340367731 0.4550414 0.1023157 0.5031461 0.1729739 0.7964919  
1.751046 0.1859056 0.6644639 1.181436976 0.1262535 0.2424386  
0.533696107 0.5531932 0.267619629 1.290585 0.03496816 2.013391 0.2221102  
0.2986113 0.8689492 0.278942289 0.656787837 0.194366 0.1752484  
0.3657108 0.479971341 0.2162082 0.3470021 0.1712827 1.290251317  
0.946326 0.4603524 0.227685453 0.6519559 0.297393883 0.194442033

0.191989 0.137707063 0.1597776 0.683777 0 1.456261 0.5980293 0.278345422  
0.6565325 1.301596119 0.565772789 0.1071636 1.083225923 0.3492315  
0.2878389 0.6176319 0.1588229 0.601134 0.509514631 0.4803221  
0.4934801 0.1426263 0.1528914 0.2097095 0.9168635 0.450091 1.41339  
0.6203839 0.8500498 1.313079 0.654075245 0.962277836 0.2809758  
0.409987558 0.368830615 0.2286531 1.103440154 0.5114588 0.07032853  
0.128654035 0.935055184 0.27398401 0.632264546 0.3241616 0.6305404  
0.9304464 0.5060557 0.7659064 0.3987541 0.686484559 0.6186853  
1.609408 1.308972549 1.449686 0.4970222 0.305778185 0.7163825 0.3706912  
0.408992926 0.5591786 0.4604306 0.1681725 1.207308 0.5615747  
0.1427908 1.056547294 0.4835027 0.6985518 0.170369314 0.08300301  
1.041667315 0.8014088 0.2443585 0.669411544 0.4094286 1.706809273  
0.6842582 2.822578 0.1343562 0.1879089 0.1664265 0.429742877  
0.2340241 0.1080251 1.630272 0.857912 0.5075796 0.1087634 0.8381739  
0.6301307 0.955394622 0.062660094 0.7993138 0.4079491 0.1442212  
0.1795686 0.725443172 0.4245414 0.97901163 0.8727459 0.7137169  
0.142458952 0.694500166 0.1432096 0.1998781 0.529206337 0.3847599  
0.1848543 0.4389219 1.113983 0.7641428 0.8022691 0.7630499  
0.287442 0.1052785 0.8478095 1.518699 0.1867407 0.1935762 0.579179891  
1.725924 0.317164 0.412766362 0.2638966 0.8336011 0.4004925 0.6875956  
0.4252928 0.430656267 1.666738 0.5361428 0.5032311 0 0.5450353  
0.067379772 0.01659807 0.3659553 0.2446233 0.751450397 0.118380452  
1.045392 0.3039601 0.5575025 0.698553571 0.7152024 0.3315303  
0.45024505 0.5620528 1.174468 0.06435159 1.086767 0.2819318 0.3124506  
1.137021412 0.47967 0.14463934 0.4518382 2.84913 0.5691044 0.2175632  
0.4547878 0.3417261 0.3624907 0.346584402 0.6856289 0.8249517  
0.047846618 0.3514235 0.09861726 0.713772 0.5030617 0.2833034  
0.7104888 0.3406836 1.801623 0.552538514 0.08751392 0.258055805  
0.6762391 0.6303565 0.3126838 1.24534085 0.544215543 2.099877  
1.357712 1.207332 0 0.1967366 0.242112881 0.2957833 6.189853 0.1502144  
0.422270093 0.08107832 0.1116434 0.234663697 0.116265 0.54071253  
0.1089978 1.491784 0.515366957 0.5557282 0.6300736 1.28230886  
0.737875341 0.1447169 0.2487944 0.7008847 1.089254 1.050068 0.9649348  
0.7887252 0.2207714 0.3466805 0.784102357 0.05793239 0.321186621  
0.7515751 0.367433432 0.5872264 0.1616781 0.242574184 0.4597408  
0.1472223 0.3447622 0.177094782 0.3230431 0.1580984 0.082807927  
1.225382712 0.2625255 0.4031491 0.6155131 0.861512513 0.907087766  
1.072953198 0.08331363 0.1558753 0.4087854 0.2147431 0.1908158  
0.3116271 0.2343712 0.3152877 0.9628343 0.2065745 0.3716535  
0.348828691 0.3744295 0.2828633 0.6439223 0.3061496 6.736027  
0.9238354 0.5906233 0.2736721 0.8171634 0.658203 1.155819466  
0.9997041 0.2722373 0.5419063 0.3392245 0.846309529 0.270611 1.25925  
0.8983965 0.1668231 1.262894 0.1169837 0.2752994 0.476818964  
0.1196857 0.1464717 0.203127278 0.1640916 0.7573054 0.7452576



0.4757223 0.6356096 0.357357792 0.691513612 1.099863 1.126736 1.765039  
0.1748546 1.345954694 0.381629353 0.51469 0.4334457 0.6377421  
0.0711863 0.78479 0.1876169 0.2593794 1.435550846 1.549273822  
0.1044769 0.927753594 7.586549 0.457846201 0.8349112 1.209765 0.3034758  
1.843302 1.262116 0.65603 0.9323322 0.0717141 0.3836707 0.959783131  
1.244097 1.096899 0.6201029 0.6159634 1.328210102 0.2967114 1.383932  
0.830654 0.323994399 0.5051481 0.3642009 0.2018731 0.1577117  
1.050737 0.4542428 0.01800886 1.079417749 1.19621212 1.241889572  
0.1998459 0.311317296 0.18938671 0.7234972 0.9043584 0.717142251  
1.663667 0.4682448 0.160315 1.154842184 0.1932521 0.4572647 0.1309224  
0.065957806 0.1483317 0.4782929 0.1694095 0.284723 0.6260544  
0.7376064 0.252068 0.2503498 0.9151627 0.7721812 0.8949781  
0.187166135 0.3457275 0.3601635 0.2773643 0.4555413 0.3301635  
0.1534078 0.1276412 0.029196887 0.288435924 0.180902317 0.1787447  
0.3718029 0.1778712 0.2498897 0.6622063 1.339848031 0.2147721  
0.9966916 0.08148626 0.2019229 0.7697437 0.084532362 0.5851795  
0.5988038 0.6513767 0.6089333 1.08935 2.298663 0.5254358 1.254484774  
0.3024994 0.5609055 0.120927355 0.1778905 0.9041911 0.688549  
0.8130412 0.4782485 0.903132124 1.05703224 0.231431647 0.0546621  
1.347098 0.2962194 0.2956014 0.7716242 0.2196366 0.413843573  
0.2244903 0 0.04481433 0.4138928 0.7915132 0.4817188 0.2124729  
0.918477561 0.2816923 0.342523 0.6953622 0.4407248 0.08156566  
0.7681682 0.7312255 0.641265099 0.6122235 0.35784786 0.3667449  
0.03562027 0.79783087 2.284675 0.3365858 0.3198223 0.672645755  
0.1536695 1.044365 1.357414 0.585348363 0.4545364 0.1338772 0.03222929  
0.164161 0.6583845 0.6687768 0.3844867  
AL359504.2 0 0.569037126 0.2142305 0.9010882 0.252863811 0.415925134  
0.3652613 0.314410743 0.1595369 0.08263721 0.435673713 0.3497871  
0.2655394 0.7299592 0.7669138 0.6680123 0.7266793 0.188174044  
0.2163409 0.2311226 0.332828247 0.2977821 1.209747554 1.300338  
0.5578196 0.45775505 0.430151 0.3335763 1.134631 0.4243825 0.1275818  
0.235010498 0.5164221 0.728109012 0.2302011 1.07056799 1.296358402  
0.929537567 0.2860445 1.212513 0.522698259 0.632273 0.204778296 0.008340008  
0.502136983 1.608623 0.635023 2.107064 0.082803489 0.0924399 0.7470513  
2.026025 0.507667472 0.3020962 0.222311312 1.506029 0.4400736 2.170414  
0.138365 0.5362211 0.2151779 1.292352 1.532086235 0.2179485 0.1210726  
1.029519 0.1525096 0.8019579 1.489905 0.04888587 0.1588435 0.500783805  
0.2091581 0.1314881 0.814588414 0.352974 0.062554161 0.8920661  
0.1563193 0.01671924 0.2453063 0.157046 0.5503296 0.341081432  
2.398192774 0.1405542 0.04320321 0.9213472 0.57792532 0.1989898  
0.1539808 0.2364632 1.049663973 0.3659507 0.5214659 0.518893393  
0.540032 1.261021579 0.081808965 0.1388353 0.195542309 0.06302284  
1.360808 0 1.158472 0.24712 0.142082263 0.9468347 1.873920371 0.267796764  
0.05635963 1.648754469 0.231422 2.012674 1.64037 0.3007021 0.3754271

0.720732364 4.365129 0.7569675 0.4154412 0.1484471 0.1741432  
0.3325504 1.12127 0.01506754 0.430343 0.9841111 1.642224 2.113886953  
0.439100914 0.3951273 1.490598656 0.394879462 0.1262662 1.224118151  
0.3688966 0.07767327 0.033830949 1.716450516 0.154386457 0.479222005  
0.2001328 0.2436352 1.387462 1.069334 1.532103 0.271181 0.71651929  
0.3003505 0.8431159 0.407232322 1.41189 0.4373332 0.148444856  
1.015488 0.1657112 0.195892904 0.9639418 2.430816 0.212269199 0.6830513  
1.18572 0.1819651 0.80372355 0.6082207 0.9258058 0.115201094  
0.1527857 0.27813163 0.82414 0.2827294 0.363059595 0.3137626  
1.994771889 3.043866 0.5354233 0.1156268 0.1945623 0.2524825  
0.513992604 0.2051305 0.1193066 1.703797 0.7580063 0.01483038  
0.04290074 1.664858 0.7297832 0.753693571 0.074147126 1.015909 0.2663368  
0.8722635 0.1287804 0.626424471 1.062985 0.704839928 0.4758705  
0.9107974 0.171880335 0.257167527 0.2372485 0.349149 0.359497809  
0.1578357 0.4374847 0.849905 0.3987153 0.2009395 0.5525279  
0.4426149 0.09070313 0.06040168 0.6688216 2.461976 0.324096 0.07126411  
0.923327967 1.257483 0.5473234 0.156781893 0.4371848 0.1644032  
1.470342 1.122708 0.3785194 0.838725607 0.7131441 0.3625315 1.780052  
0.04066544 0.7709781 0.148833121 0.5106628 1.261143 0.3400104  
0.51506065 0.186776404 1.030863 0.1113304 0.7330061 0.404872386  
0.4490653 0.7846148 0.453854134 1.159644 1.520438 0.07107213 1.078292  
0.2224109 0.2854056 0.647184975 0.35678 0.085577523 0.2772365  
1.909834 0.7997032 0.2128233 0.615041 0.2695815 0.3379555 0.723224601  
1.216981 1.234831 0.056617999 0.1940622 0.1711542 0.6172243 0.3779584  
0.658716 0.4301448 0.3271851 0.9069931 0.589730363 0.2301272  
0.175815262 1.471092 0.8770156 0.07848611 0.827306877 0.572429091  
0.06496295 0.666156 1.177176 0 0.2910037 0.190998481 0.3161355  
1.447742 0.1086263 0.545107506 0.1187851 0.09908261 0.218780491  
0.09171935 0.509118036 0.1375783 1.398127 0.550056756 0.6156311  
0.2565438 0.72256451 1.069433172 0.07610969 0.1873481 0.952243  
0.5552353 0.5942725 0.8490527 1.566014 1.319969 0.2865134 0.965828306  
0.04570182 0.116943843 0.04743232 0.238100602 0.9695978 0.2763474  
0.337162315 1.595797 0.1583741 0.284928 0.114305626 0.1158377 0.09354075  
0.177312556 0.900014557 0.03944793 0.4603168 0.6936673 0.668304476  
0.640698345 0.872082907 0.2628985 0.1106705 0.3547318 0.08470347  
0.2431657 0.2381546 0.1617798 0.1890309 0.5178836 0.08962958  
0.1599222 0.29137199 0.2278651 0.5375784 0.3505768 0.372337  
0.6642413 0.334032 0.2644479 0.2065082 1.019237 0.2709101 1.265800038  
1.066136 0.5215676 0.4096876 0.1137334 0.74962898 0.5184517  
2.566282 2.134333 0.1786051 1.055459 0.1640646 0.1592644 0.417948748  
0.01573631 0.2393512 0.269883694 0.233008 1.120171 0.4495861 0.3096132  
0.5969297 0.383715069 0.331210154 0.7465932 1.313392 0.502284 0.165527565  
1.467430579 0.960526382 0.2842207 0.4123363 0.4192527 0.9209844  
0.3224514 0.2114394 0.1723114 1.007907333 1.80672179 0.2884699

1.0528916 1.180876 0.307008613 0.7591179 0.1772387 0.5320146  
1.313424 0.6637739 0.1468667 0.7249929 0.09900443 0.1842344  
0.4659419 1.481091 1.066837 0.1663239 0.4091978 1.234395667 0.2925879  
0.1637639 0.5925476 0.546440919 0.8767048 0.3501609 0.2605975  
0.1244159 0.3407729 0.1893138 0.5540677 2.974195591 2.851088532  
1.570408308 0.08868085 0.279082494 0.160075454 0.3716537 0.6406329  
0.632298291 0.2124898 0.0335809 0.43361 0.704533078 0.1143398  
0.3468537 0.134267 0.221139922 0.1690234 0.5914693 0.1158249  
0.3782953 0.4568418 0.7962628 0.4149953 0.1069772 0.9516684  
0.5698592 0.3491367 0.168745126 0.04958876 0.7387288 0.3481031  
0.4155196 0.1176271 0.2161082 0.09230267 0.207296071 0.246503718  
0.186621518 0.04028814 0.726288 0.2192491 1.523304 0.6194202 1.348563147  
0.2710877 1.100781 0.1428512 0.07079703 0.3984992 0.111143425  
0.3711204 1.86807 0.4382918 0.8176621 0.2005194 2.412048 2.607381  
0.269901925 0.21 0.4827144 0.169595391 0.1684015 0.1601286 0.6061617  
0.7997623 0.8029327 1.030333465 1.233193431 0.349930143 0.1940487  
0.5510303 0.2256241 0.1415824 0.9716114 0.2165842 0.427793156  
0.4095354 0.212269473 0.1296285 0.9674447 0.09105986 0.4512728  
0.3432138 0.317794021 0.7962953 0.4107195 0.6453632 0.5601509  
0.1715885 0.5627087 0.5424118 1.054636317 0.1577052 0.070574929  
0.08399568 0.04215029 0.489528955 1.439531 1.235275 0.3710324 0.849020951  
0.1212271 1.70661 1.441922 0.214777097 0.2022734 0.1642874 0.2118759  
0.2888927 0.7318644 0.5464283 0.2295354  
AC009133.1 0.8610719 1.51651708 1.253549 3.380250391 3.858912116 2.385518553  
1.567076 1.600059872 0.8062853 0.7112769 1.322683878 4.262613 0.687672  
2.075736 3.944118 7.535786 1.876657 1.947176286 0.9160124 1.491993 2.543740722  
1.011179 5.673037343 3.760896 3.408352 2.84872335 1.862188 1.315951 1.172715  
2.082278 0.3835007 2.033877477 1.156729 5.19501003 2.047136 4.804331472  
3.950992001 2.773647173 3.531096 3.22587 2.809785524 4.93139 1.733002875  
0.9454749 2.635285501 1.397891 4.530848 4.51535 1.772392389 1.214414  
1.861813 4.750968 3.041877479 2.436841 3.019301124 6.72374 1.827641 3.237204  
0.8927684 2.155022 1.973932 4.418323 8.721276818 1.849796 1.479734 1.991263  
1.046784 6.147947 2.620437 0.7944831 1.995934 2.329656911 0.9356667  
1.701006 3.392167678 1.424576 6.955150793 2.578987 0.5868227 2.498477  
0.8542858 1.220114 2.499072 0.780668927 3.685073871 2.132311 1.691961  
2.729841 2.239464932 1.224466 1.430949 3.093107 2.849458061 2.405053 2.048558  
2.855811073 1.02953 2.696866983 3.03200553 1.440844 1.334895922 0.7944061  
2.1236 1.181947638 3.451663 2.088216 2.744286499 2.473205 3.713971916  
1.376420557 2.557944 4.889609531 1.58129 5.486369 3.276844 1.703479 1.460725  
1.845981892 1.501973 5.466639 0.6621298 0.7428832 1.121702 2.646247  
2.929697 1.367714 5.267961 3.514236 5.96874 4.202763466 1.840833029 1.868011  
2.865071456 2.141912729 1.501502 2.577069931 4.222251 0.75212 0.250321659  
5.313677648 0.740477813 2.039125214 0.4186845 1.710154 4.016553 3.147929  
5.089371 2.270234 2.10040977 1.235191 3.829524 2.300247585 4.516396 1.422685

1.36438381 2.355643 1.603499 3.754560271 2.247221 2.408849 2.240237573  
1.357571 2.494625 1.075055 3.461161193 2.247446 4.818741 0.707792214 1.320828  
1.638675388 6.03681 1.207297 1.334451775 2.103331 4.403200277 3.019331  
9.692014 1.290956 1.406552 3.594886 3.060421127 1.187136 1.40523 2.96287  
5.349306 0.8229964 1.805954 2.372922 2.234547 2.935746246 0.391877689  
4.249088 1.517597 1.713729 3.966324 4.368336036 5.633412 4.586126709 4.262191  
11.35593 1.213252828 1.976699398 1.025503 1.022356 3.613055051 2.844243  
4.003902 1.127125 1.993301 4.190786 4.300637 1.701826 0.8928423 2.316421  
3.138725 8.146342 1.455958 0.5891734 2.222373396 5.097917 3.04971 1.835698085  
5.409236 1.775801 2.408356 2.235124 2.216493 5.900085482 7.217169 0.985386  
3.522855 0.3223836 1.486883 1.251542155 1.780251 4.824323 1.202048 3.178000267  
1.270941213 3.4324 1.089665 4.960151 2.059563138 2.519425 4.959957 1.267129358  
1.802611 4.247004 1.195295 3.328264 1.274318 1.378136 4.568115663 1.808492  
1.04591808 2.18215 10.48512 2.302352 2.166148 3.020326 2.46079 3.11716  
1.433377799 3.055156 2.764838 3.164398072 1.326013 1.42162 1.377814 4.781663  
2.270684 1.224522 1.398814 6.237835 4.512592334 1.974892 1.566203987 3.050161  
2.885021 0.8844337 3.656444458 2.299965689 0.5665078 3.07028 3.189951  
1.762474 1.168876 0.946362246 2.306327 3.00549 0.7946136 2.532850703  
0.5831256 0.9644166 1.450915035 1.43001 0.992671665 2.566506 3.504599  
2.436297217 4.281566 2.059226 4.41077421 3.809801841 1.704535 1.821187 3.41333  
2.950215 2.562617 3.814255 4.453291 3.226499 0.8311235 3.690750516 1.354136  
1.031394608 1.081085 2.367696045 1.054784 1.756853 1.932451328 3.902097  
0.7993624 1.391231 3.141428404 1.290249 0.7868812 1.08385451 2.636004506  
0.5590077 2.906135 1.499779 3.344999903 5.151828357 6.745859056 0.9248555  
1.72548 0.9075765 0.9205202 1.280574 2.396567 1.969619 1.348723 0.9785081  
0.9301835 1.031861 1.30894965 1.940258 2.512832 2.251776 1.451956 4.002091  
1.649048 0.9109639 1.384124 4.060822 3.463159 4.056476372 8.208871 2.377529  
2.135836 1.148272 3.064275496 3.856271 5.967474 2.944918 1.553795 4.437832  
2.101372 1.84225 1.329491449 1.506391 1.125417 2.169645812 1.975498 2.180628  
3.664714 1.714447 1.937081 1.434076202 6.386717533 1.359718 3.176243 1.794402  
0.738142699 4.08113281 2.494689471 1.778433 5.596962 1.076052 1.023962  
2.602313 1.211076 1.895372 7.932035083 3.693127773 2.156224 2.784034506  
3.361677 2.047317271 4.712674 4.561157 1.831165 3.495604 2.712059 1.8435  
3.490166 1.704306 0.9337127 3.038191519 3.253711 0.779976 1.527986 1.774062  
2.594407905 1.458739 1.260405 1.829278 2.784372424 2.745001 2.081979 2.117589  
0.6769827 2.752658 1.680387 3.131053 3.991720463 7.871112673 3.883403143  
1.265464 1.889461039 0.960233424 8.034094 0.5713592 2.4997415 2.499584  
1.826931 0.9381598 3.717133627 2.334115 0.5939469 0.80651 3.021574632  
1.85534 1.184375 1.479756 0.9512496 0.8662732 2.664619 1.082945 1.053581  
8.056188 2.212103 2.020533 1.078570255 0.4914063 2.511505 0.8042433  
2.350397 2.334613 1.404859 2.218528 2.818095926 0.755376836 1.288018161  
1.369395 2.834608 1.623425 2.266084 2.470081 3.404749784 0.6178671 5.017833  
1.160794 1.396129 2.203907 0.801812165 1.625349 7.719669 3.055294 2.280919  
1.548024 3.996361 4.192412 4.88565475 1.025376 1.084265 1.180641005 1.029091

5.297078 2.752224 6.355973 1.970977 3.010930046 2.197360843 1.736854685  
0.3076722 2.246609 1.587455 1.294089 3.378029 1.974568 2.458777968 1.026651  
1.907184371 0.8267961 2.310472 1.278787 2.322274 0.4872305 2.237206964  
1.820434 1.610894 1.283326 1.852848 5.75153 2.144706 4.648182 3.541463814 3.00839  
1.827690892 1.505658 0.9133571 2.858655265 7.705537 2.48941 1.158926  
3.724584832 1.563312 3.522335 4.442172 1.464312915 1.541608 0.6698171  
0.4669537 2.732513 2.667051 2.289197 1.523989  
AC060780.1 1.712255 2.294781963 1.590742 3.107213167 1.416299195 2.784123406  
1.559653 1.649683473 2.144572 0.9838953 1.437513746 1.507054 3.236356  
3.896545 3.740399 2.778867 1.56886 1.531029389 2.167901 1.213156 2.376833125  
1.774633 3.77609471 4.809951 2.249545 1.989588189 2.086163 0.6192321  
13.71278 2.235647 1.872226 1.605888627 2.391132 1.974690158 2.811936 4.543474115  
2.078245097 3.378357559 2.526812 2.955954 2.292813407 5.337073 1.224964511  
3.396946 1.970990952 3.958835 2.865754 0.5605828 1.508848132 1.881685  
3.220438 5.510594 2.618631555 2.37564 1.745864405 4.191023 1.868818 3.365389  
1.002317 1.401583 2.623934 3.844927 3.949153284 1.895733 1.179949 3.084661  
1.888258 2.233857 4.018868 0.8542919 2.925294 3.880122585 1.084476 0.7712846  
2.755978409 2.682995 1.524101153 4.431673 2.867683 0.60682 1.601655 0.9922118  
4.192086 1.567768085 3.482464474 1.047757 0.7085254 3.115065 1.781455342  
2.407426 0.9429475 1.691497 4.033491097 3.846883 2.553569 1.247490698  
1.365453 2.522978835 0.962251336 1.645729 0.9492075 0.6438595 1.12063  
0.248791098 4.477165 1.676053 1.041784763 4.014156 6.987677778 1.067956707  
1.439466 2.74339123 2.355386 1.234833 1.833916 1.515819 1.806178 2.664319408  
1.609575 3.101112 1.175085 2.668978 1.685461 2.346909 1.972005 2.086216 2.484095  
4.038912 3.362279 3.333833268 2.911286115 1.528673 1.28541494 3.059177207  
2.436883 4.516035549 1.82859 1.252946 0.515408302 3.813778652 0.871641827  
2.340131403 3.078879 2.497236 7.111424 2.012432 3.408373 2.901695 2.161555121  
2.182751 2.36005 2.033279672 3.549132 2.797519 1.99546779 3.750971 2.266881  
0.77449632 2.767253 2.948371 1.640719715 3.789153 2.942588 1.968499 2.627649723  
4.268148 2.370501 0.787199416 2.757986 2.277257118 2.32193 1.209277 2.218374212  
1.649884 5.781917921 2.035778 5.186712 1.256401 2.453495 0.5430388 1.764086304  
1.323582 0.6758776 6.412916 3.438952 2.053379 0.8996403 4.206138 3.454861  
3.417697645 1.046557735 2.354542 1.998961 1.665345 1.661883 3.451448125  
1.605084 3.255702684 3.103169 1.714073 1.066384095 2.885819022 1.15419  
1.044667 1.714773683 1.044531 1.960294 1.622044 4.200274 1.901177 5.941878  
1.094771 0.9754204 0.5988122 2.649023 5.698725 1.66345 1.915933 3.800320949  
5.024478 1.618625 0.551202323 1.021453 1.87849 3.430299 3.323627 2.786969  
2.012294289 4.22402 1.403981 2.702695 0.09110742 3.707073 0.528753005  
0.4576385 1.429763 1.371176 3.004622455 1.12983258 4.859976 1.945525  
3.448698 3.401556934 2.259838 1.615036 1.167133963 2.674497 4.199465 1.009979  
2.209882 1.793853 1.325357 3.968318201 1.976537 1.41879534 2.661963 6.19992  
2.67807 2.039526 1.745399 2.329615 1.327943 2.3593479 5.241017 3.701174  
0.735717072 2.844701 0.8680058 1.979642 2.557286 1.344029 1.699621 2.48183  
4.700926 3.60181592 1.701415 1.753887184 4.520029 3.962167 2.079952 2.974883695

1.311625507 4.628297 2.914697 4.315683 0.3125241 2.138458 0.64187357  
2.590261 6.36614 1.340736 1.506228815 1.486222 0.7843508 1.119824617  
1.411027 2.201117824 0.5432594 5.584208 2.378980911 4.539048 2.726539  
0.19426126 2.674998021 0.8952154 1.283197 3.496054 2.665622 2.263408 3.46337  
3.62756 3.388546 0.8228101 1.487954546 1.274768 1.54581563 1.099874  
2.198716899 4.011515 1.614507 1.420937131 1.546178 0.7664189 0.7312085  
0.836567037 1.136717 1.04785 0.890684325 4.727350459 1.08707 1.260062 2.78043  
1.811961183 3.36673507 4.654705365 2.341281 2.049701 0.5418724 1.053228  
1.696637 2.137702 1.522306 1.350766 2.92389 0.9200629 1.719802 2.502376806  
1.350021 1.908858 3.6066 2.110273 7.393256 2.367571 1.735099 1.779153 5.000307  
1.532551 4.657632194 3.396373 0.9898114 3.424054 1.672753 1.731963158  
0.5739406 3.163569 5.103009 1.086721 3.739264 2.687875 1.839236 3.188368171  
1.047099 2.252233 1.394476978 1.479098 5.11968 2.851318 2.194494 2.696137  
1.905333133 0.641653216 2.861636 6.277424 2.27344 0.982753324 3.73669753  
0.578143065 1.500963 2.176573 2.423393 1.041759 2.600729 1.875899 1.606928  
4.734461155 3.095380435 1.458773 2.91699768 7.684412 1.262363859 4.231838  
2.895688 2.777204 5.21263 3.097231 2.077667 2.909588 0.9696307 1.981255  
1.988634942 4.34172 1.561569 1.183662 1.615812 5.344600857 2.386085 0.9539372  
3.617189 1.836381007 1.499921 2.691457 1.518001 1.74848 3.454197 1.490554  
0.6302193 3.699447908 3.225297906 4.202670975 1.033146 1.99583116  
1.62103166 2.926199 1.330899 1.91242361 2.772379 1.794358 0.971466 3.641311462  
1.101525 1.380123 1.180116 0.716938096 1.590466 2.385245 1.233603 1.493786  
2.207473 4.034491 1.55735 0.5530922 3.64668 6.735802 2.450928 1.020759243  
3.266321 2.368007 2.072293 1.902129 1.174606 1.150393 1.195658 2.394389845  
1.427406664 1.180544478 2.071516 2.328128 2.534637 1.22862 3.731898 3.625608057  
2.171272 4.952542 1.488213 1.142026 1.249925 1.304798297 3.163617 2.309104  
3.981997 2.486807 2.336081 5.843302 4.781137 1.883184003 2.925573 1.694319  
1.196886367 2.009064 3.111379 2.825456 3.640368 2.821892 5.186473773 4.752126246  
1.227112384 1.246282 3.364993 2.068904 1.298668 2.517759 1.420778 2.345640783  
1.785462 0.418502961 1.394023 2.747277 2.273275 3.56524 1.019294 3.246675509  
1.86701 2.063144 2.819468 2.427718 0.5189795 2.036516 3.229032 3.146587611  
2.119949 1.570629614 3.036053 0.4343969 2.056401809 6.104177 2.483016  
1.416478 4.170116952 1.879465 3.987001 7.311388 1.371390533 1.631434 1.104216  
0.3417766 1.339116 3.665477 3.026793 2.446381  
SNHG14 0.7140688 1.779200253 1.19905 1.491499241 1.167803803 1.951526927  
1.3323 1.084206704 0.8075019 0.8738804 0.388371575 0.3612083 2.31901  
4.159617 1.397973 1.451853 0.6256109 1.291104979 1.334469 1.258424 1.314461074  
0.9476844 2.097646005 3.809908 0.9600762 0.875011843 1.826885 0.6668456  
0.809094 2.102777 2.592348 1.114928762 1.685808 1.234671336 1.42789 2.158784749  
1.34641519 1.287792807 1.723974 1.661171 1.586842261 1.390415 0.819333792  
3.037895 0.98476129 2.605473 1.721517 0.484248 1.196976652 0.8890957  
1.550926 2.437736 1.022792235 1.061258 0.937324129 1.545239 2.137038 1.936012  
1.534101 0.815046 1.505776 1.842793 1.140843747 0.940049 0.2530753 1.242347  
1.642692 1.338374 2.557019 1.432731 2.458044 2.025048706 1.130983 2.826173

1.090203344 1.617642 0.22865117 2.298468 2.078244 0.9895187 1.814789  
0.7184127 1.691015 2.537306288 2.305715745 0.8021044 0.9081737  
1.254786 1.336046185 1.43605 2.475666 0.9815237 1.633296794 0.3953653  
2.21915 0.416729186 2.351632 0.753568802 0.98617992 1.158607 0.692405254  
0.5374247 0.2474033 0.34117933 2.540282 2.947356 0.994023833 1.850995  
2.248006558 0.642025651 0.8182777 1.360322523 1.113884 0.999887 1.362218  
1.021807 0.9778526 1.161297149 1.574465 2.383626 1.485959 4.37785 0.6929489  
1.630809 0.5714207 3.861892 0.09160664 1.963377 2.122387 1.694071516  
2.494604622 1.947797 0.770092539 1.49387701 1.539765 1.489104808 0.9971772  
1.261468 0.870807676 2.269676937 0.351433608 1.114839628 1.524884 0.9243213  
2.24256 0.6347519 1.751811 1.859485 1.01720549 1.313155 1.462851 0.285228533  
1.318325 1.572817 1.12500819 1.599552 1.239595 0.339985524 1.509794 0.8494462  
0.781317673 3.717396 1.660974 1.460361 1.305693966 0.9918994 0.7507251  
0.722407058 0.8025916 1.8844107 1.57652 1.135835 0.851484968 0.9751922  
3.127767129 1.551044 1.978127 1.002622 1.290537 0.1246726 1.051288935  
0.9540911 0.7819132 2.092216 1.759835 1.681446 0.9701746 2.118687  
2.230243 1.688816275 0.793063182 1.513578 1.208166 1.900886 0.6026403  
1.7421447 0.806991 1.473475761 1.881922 0.7502918 0.660388084 2.150206854  
0.6364928 0.7745618 1.372180823 0.9083111 0.6119839 0.9815685  
2.633409 2.117521 1.635932 0.6502476 1.005878 0.9300662 1.927641 1.489243  
0.6814277 1.357926 2.096793368 2.199978 1.191806 1.722663181 0.553634  
2.509893 1.345812 1.473859 2.772063 1.01084093 1.483841 1.965233 1.169399  
0.1981898 0.9372094 0.539834069 0.6723546 1.550456 0.9747084  
1.331550327 0.95253004 1.638093 1.284366 0.701345 1.641883128 1.081696  
1.739526 1.647289381 2.061415 1.86882 1.142705 2.568294 1.351111 0.5940216  
1.836036064 1.070557 1.081401822 1.986573 1.718144 1.698779 1.35449 1.069469  
1.063107 1.13346 0.072199084 1.985439 1.456572 0.56674556 1.436087 0.7366348  
1.525878 1.434754 0.2929903 1.611944 1.513089 1.491562 1.206043072 0.716256  
1.703333616 1.713262 1.617995 1.603521 1.174295415 1.254056433 12.94632  
1.864035 2.139491 0.143755 1.208914 1.221907285 1.271538 8.538519 0.7508843  
1.570936945 1.327968 1.587966 1.15331797 0.8387008 1.156508245 0.3839377  
1.86385 1.316492553 1.380551 2.097263 0.90463504 1.665781948 1.545093 1.15911  
1.323607 1.523156 1.34172 0.9804576 1.775951 1.072583 0.6875436 1.217081872  
1.047824 0.944078867 1.834475 1.643202937 2.657975 1.026404 0.721217864  
0.7035574 0.9599754 0.3293967 0.30689861 0.8757354 0.719773  
0.580102825 1.821088705 2.566965 2.044734 3.401224 0.897494258 1.648572961  
1.428786684 1.760801 1.051289 0.3296287 0.6322027 1.010232 1.718161  
1.719405 0.5766308 1.710874 1.217022 0.862638 1.755930584 1.284176 1.161985  
2.23153 1.236538 9.95031 1.955414 1.137237 1.30669 1.937241 0.9408312  
1.822927406 1.474279 0.7883707 1.795376 1.223304 1.234677752 0.8430696  
2.226614 2.965912 0.9316383 1.479366 0.8622893 1.169056 1.105072352  
1.146615 0.9939374 1.458325629 0.9916699 1.596394 1.577495 1.471988  
1.584925 2.631349202 0.629421869 0.7892373 2.280609 2.171496 1.480004849  
2.097378943 0.593057837 1.289069 1.772883 2.017451 1.42632 2.273154 1.109777

1.097036 1.255730763 0.718789279 1.502119 1.458043652 7.141909 1.284652746  
0.2433663 1.549354 1.573184 2.38402 1.994317 2.081822 1.355947 0.8494571  
1.065725 1.495596994 2.213779 2.414457 0.5914666 1.280767 1.232151974  
1.589067 0.9498712 1.574653 0.941009635 1.102888 1.129196 1.048248 1.246227  
1.509892 1.699784 0.5136993 1.529407087 2.191166519 1.550239187 1.091717  
0.971493084 0.644678691 2.698381 2.298333 0.95274549 2.061725 0.7706577  
1.218374 1.265555215 1.139535 2.017 0.7025995 1.095605098 1.630643  
1.117367 1.218039 0.3529361 1.612849 1.187812 1.354548 1.595815 1.981949 1.57632  
1.322203 1.844877269 0.7565137 0.6393013 1.932661 1.634603 1.093097  
1.450065 0.6398829 0.801915286 1.305273505 1.282602602 1.542296 1.644096  
0.9931731 1.342297 1.849075 1.008364128 2.514813 1.773092 0.3020381  
1.033574 0.4718319 1.209202857 1.966158 1.541988 1.356943 1.169106 2.963562  
2.075308 2.155185 1.438064228 2.527615 1.745072 1.001327746 1.399424 1.52238  
1.776812 3.207051 0.943511 1.581015461 1.922330758 1.03565393 1.005191  
1.630276 1.523496 1.03832 1.528104 1.390305 1.207881397 0.9428949 0.724171686  
1.159155 1.786655 2.867777 1.102796 1.668401 1.863595303 1.736425 1.002117  
1.741679 2.08216 0.5079561 1.409756 1.789493 1.166190798 1.498948 1.186005602  
1.234638 0.4797386 1.281169389 1.732687 1.020345 1.079126 1.126781699  
1.077982 1.965068 2.406481 0.833954455 2.125912 0.7207169 0.3201718  
1.618305 1.825116 1.668224 0.8921205  
AC012615.1 0.997919 2.477039964 0.6412309 2.607446505 1.59288412 0.920627488  
0.9268405 0.937516947 0.9585568 0.3928471 0.793239291 1.370702  
1.767278 1.551596 0.9936832 1.846898 0.719212 0.561495305 0.6665932  
0.4611945 0.666585288 1.247842 2.830368254 1.89002 1.727147 1.654919001  
0.9979394 0.6460588 0.8625751 1.484319 0.6551783 0.663775 1.272967  
1.889230628 0.6661247 1.253487594 3.680729382 1.559346775 1.699775  
2.152957 1.333645445 1.764813 0.668824202 2.528621 1.225376592 2.973909  
2.813839 2.975647 0.748397356 0.3906204 1.386387 2.497048 1.993488021  
1.154221 0.850828745 1.693339 1.146404 3.023379 0.7863465 2.258025 0.416749  
2.834259 3.348282585 0.7584525 0.5720111 1.13128 0.4649687 1.803579  
1.143119 0.1656907 0.7830899 1.894489637 0.7242517 0.7218918  
1.116774779 0.5853207 0.587865854 1.48188 1.133302 1.504255 0.4966959  
0.6000271 1.689735 0.569544752 3.521344909 0.5196933 0.4366285  
2.718433 1.522816572 1.179547 0.6958574 0.8326791 2.182296463 0.9291204  
1.400167 1.008488221 0.6972766 3.18067222 0.46633157 0.5755605  
0.709620714 0.5437236 1.103009 1.165877091 2.451059 0.4291697 0.748216393  
1.346493 3.891486826 0.902152804 0.6135853 2.874632315 0.6655239  
3.994391 3.362885 1.389792 1.047183 1.691173076 6.033778 3.394169 0.9387138  
1.052014 0.7082763 0.7684947 1.554693 2.06133 0.7487886 2.050129  
3.705511 3.692603893 1.55934938 1.2828 3.622290919 2.049194176 0.6447172  
1.709870348 0.8240714 0.4102768 0.416961885 3.234445417 0.409100341  
1.506721085 1.178491 0.7506929 1.500412 1.739681 2.420211 1.069526 2.628763897  
0.5899712 1.772632 1.487799753 2.836422 1.115188 0.583173157 2.187536  
0.7328499 0.781114418 2.678136 6.146859 1.090078868 1.316134 1.734389



0.8543603 1.443064899 1.639008 1.874571 0.650759068 0.6007867 0.934891327  
1.739283 0.8711504 0.962730006 1.489964 2.750479856 3.049269 3.257611  
0.7244178 0.799318 0.7966241 2.021773275 0.5056411 0.4621377  
2.492793 2.035292 1.553651 0.4652963 1.891837 2.059605 1.498653039 0.685390005  
4.274391 1.217285 3.9107 1.269761 1.067539368 1.471636 2.217972041 2.133876  
2.306321 0.627372891 1.047331259 1.19747 0.4580842 1.043373002 0.8828684  
2.4084 4.771928 1.17337 0.6858145 1.807701 1.440165 0.8197961 0.1954162  
1.678067 5.452099 0.7383661 0.5395398 1.325698852 1.325373 1.541871  
0.639150581 1.167453 0.7767282 2.740731 2.223284 1.441971 2.002010833  
2.252285 0.6595843 2.051839 0.6348483 1.297416 0.68132932 1.113527  
3.089958 0.8494425 1.593002011 0.460398803 1.579081 0.6121822 1.471284  
1.399971551 1.106934 2.326909 1.945631674 2.844479 2.239919 0.5631135  
1.230941 0.5856166 1.199177 1.86117578 0.9727284 0.773469727 1.147103  
4.803763 1.193123 0.7192148 2.358315 0.6360322 1.009274 2.72844523  
3.097041 2.22117 0.58150768 1.30979 0.3451832 1.147754 0.6909791  
1.275778 0.8514494 1.108941 2.443151 1.53267323 0.9785188 0.809736099  
1.852949 1.437499 0.8153216 1.669668001 2.260842525 1.961616 1.303986  
2.347745 1.647608 0.8727347 0.891168709 0.6586649 1.481895 0.3651286  
2.873972203 0.9347145 0.4884719 1.19265619 0.9545842 0.712275867  
0.3179313 2.566164 1.62115499 1.942878 1.146177 2.31543266 2.035488117  
0.3752166 1.319451 1.627934 1.238293 1.331696 1.888414 1.594049 1.717224  
0.7544009 2.046367049 0.5351053 0.600548797 1.461492 0.663465251  
2.310365 0.851486 1.201719925 2.209456 0.8458404 0.6704152 0.579173927  
0.3997514 0.6148678 0.517583693 1.766592596 0.9845357 1.083093  
1.095872 2.23369834 1.743387706 3.192878642 0.7492935 0.8183991  
0.1987283 0.3566859 0.8420098 1.164621 0.7833234 0.6131 1.127636  
0.3715717 0.700807 0.758125444 0.884128 1.787657 1.031704 0.9426061  
1.244376 1.197643 0.5975356 0.6825727 1.138092 0.9599427 1.930270324  
1.673998 0.7562647 1.262336 0.3628057 3.334729064 1.277969 6.442421 2.34941  
0.7530706 2.395002 0.4170528 0.7583979 1.262034693 0.3685011  
0.7425791 0.613282905 0.7019936 1.380596 1.506039 0.8210056 1.000563  
1.225740896 0.672349262 1.106686 2.305476 2.413544 0.408020989 2.720234615  
2.491355991 1.33864 0.892447 1.072201 1.716494 1.430701 0.5863416 0.7300268  
2.051776795 3.733098092 0.6433494 2.310494001 2.083887 0.556447029  
1.430922 2.184443 1.016336 2.389624 1.998033 0.6292294 2.589982 0.7669931  
0.989361 2.167858356 2.771127 0.4967258 0.3858673 0.6619342 2.830467034  
0.7773162 0.8241668 1.632451 1.488175916 1.189671 0.7746103 0.7851139  
0.9339855 1.180535 0.9333067 2.27627 5.719031764 5.716319829 3.19625023  
0.7407972 1.059413477 0.539261631 1.66864 0.3588961 1.199710496  
1.317156 0.300063 0.7348254 2.03607834 0.4814846 0.341994 0.7001175  
0.737493579 1.153767 0.8295266 0.5600295 1.413302 0.6695746 1.717421  
0.6713124 0.2535538 2.709846 1.295703 1.023173 0.519940235 0.6111748  
0.8754551 1.152258 1.397955 0.5384741 0.7457813 0.7342807 0.804319158  
0.444033671 0.595316136 0.7820598 1.686995 0.8755177 3.246888 1.398083

2.066377078 0.8213585 2.325767 0.5017772 0.4144679 0.8887384  
0.438344875 1.49492 2.593476 0.7264607 1.612412 2.565522 1.956926 4.185871  
1.045472959 0.7411725 1.850921 0.901416151 0.4237532 1.255904 1.465065  
1.454146 1.573828 1.445492727 1.375142453 0.843816887 2.272043 1.474699  
0.6157456 0.5440245 1.832316 0.7794563 1.359748198 0.9958518  
0.505797248 0.5228684 2.220775 1.282629 1.327044 0.6295908 1.880048879  
1.483547 0.8392367 1.060535 1.095083 0.9516622 2.116159 1.358253 2.208645821  
1.5914 0.396254293 0.5981361 0.3636476 1.174354015 4.947572 3.670979  
0.6402095 1.197330954 0.8964647 2.495036 2.103831 1.045604018 0.4532713  
1.778949 0.2924703 0.4542789 0.8147215 1.869448 0.4142454  
AC009283.1 0.8823347 4.507810189 2.202992 4.311232753 7.775899786 2.401903491  
3.866557 3.348258199 1.583991 2.051197 4.030734065 3.317089 3.097837 4.14895  
4.246516 4.884733 3.033566 1.720821303 1.488941 1.83033 2.581676473 2.562373  
8.753924672 4.251608 3.74856 2.916313659 3.349673 1.301132 3.790225 4.355909  
3.589036 2.819457988 3.703116 7.799886359 2.558871 5.124855207 6.793096679  
6.814994208 2.256821 6.197866 3.368755803 5.054422 0.914930378 4.016057  
3.464963163 6.572888 10.65835 8.553382 1.667095986 0.5572396 4.902195  
7.707906 4.132012362 2.736968 2.468644222 6.099202 3.798356 8.093534 1.125738  
5.878548 1.182668 5.731653 7.527388345 1.813892 1.402439 3.417517 1.135665  
3.714411 3.992094 0.5763796 3.075358 6.111568147 0.9641654 0.8901163  
3.816709634 2.182389 2.251416401 3.152914 2.259594 4.150001 2.261599 3.352409  
4.313722 1.037795056 4.078717927 1.173503 2.680943 5.682702 2.819552575  
1.552341 2.675447 2.221995 3.789738172 2.525219 3.906215 4.037327859 1.436198  
12.665867146 2.056021011 1.535093 2.588636582 0.9698873 1.18678 2.603242043  
4.888394 1.338314 2.532829111 3.595613 5.830166848 2.548082751 0.7927339  
6.637818781 3.41922 10.45275 9.796217 3.172174 3.801066 4.575662028 10.83499  
5.046249 2.427607 3.408357 1.534499 2.868427 5.357626 0.710604 1.759363 4.777378  
9.657646 8.263036101 3.417556281 2.727028 8.516797156 5.1587272 1.477524  
5.266681361 3.805729 0.9639915 0.419870921 7.535139692 1.571175416  
4.782318707 3.504944 3.074116 4.154921 3.503637 6.588194 3.527135 5.314888721  
2.096779 4.087032 5.812215419 8.410927 2.489245 1.151454524 6.882374 2.492137  
4.004326092 2.595436 3.675703 3.249144847 2.984947 6.274426 1.828182 4.014587209  
5.194417 4.568658 2.883316688 1.318311 1.882827649 7.986465 1.531162 2.075435247  
3.138155 6.065420927 8.597519 10.18909 1.07627 1.724774 0.676841 5.157559298  
2.520385 1.163405 8.56737 5.610904 1.067535 1.363033 5.246175 4.357972 5.412836372  
0.766857551 14.52128 2.809647 4.706754 2.26955 3.992810036 4.264989 6.83062316  
2.915282 7.275519 1.952681542 2.719856465 1.878843 1.202124 3.742049462  
3.495839 2.002904 2.370055 4.322273 2.570564 2.867616 4.504448 1.08818 0.7683773  
4.209614 8.888793 1.925832 0.7075587 2.811660208 5.575264 3.53223 2.754051115  
3.384688 1.530288 6.575386 3.037246 2.348874 7.273333656 6.638045 3.749437  
4.609114 0.1682309 3.422577 0.923572974 3.282635 6.977338 3.832052 5.162117584  
1.931712034 4.477863 1.254164 3.716868 4.047764856 3.744103 4.990591 4.187802501  
4.76917 5.660978 0.5292394 2.895891 2.132966 2.415087 5.411110672 2.468914  
1.097493039 2.506826 7.83639 4.248596 1.124691 4.367877 1.52948 3.226397

4.203317385 6.768725 9.070927 0.983748713 2.59198 0.424834 3.359772 1.719955  
3.824839 0.4529606 3.103493 3.759923 4.550543932 0.7711401 2.962949838  
3.290363 3.500997 2.671761 4.312385198 5.489711966 6.611214 3.793353 4.090733  
3.751016 1.805802 1.727045073 1.21442 6.638919 1.642286 7.592112736 1.973193  
0.2186133 2.589933111 0.3035508 1.810190351 1.984926 5.742373 3.353974313  
3.750794 2.845635 2.86964535 5.208226649 0.9918154 3.078055 4.879751  
3.051703 3.620665 9.0598 3.366519 4.982839 1.616307 5.171812465 0.3686791  
1.717457831 1.79546 2.775160016 4.358814 1.794 3.279721169 2.417778  
1.782105 1.99313 3.089461523 1.811432 1.31571 1.644658962 3.516465143  
0.8567694 3.635497 1.455704 7.25393536 3.67633007 10.886958935 1.753752  
1.43456 1.040597 1.541822 2.759217 1.868766 3.786185 1.753352 2.6138 0.6067525  
1.455499 2.370603516 2.03197 8.182405 3.161104 2.422913 9.562808 1.356749  
1.922328 2.632842 2.313687 1.93328 2.875666181 6.090187 2.627316 3.249705  
2.789845 8.169666555 6.283029 9.011864 4.691162 1.283319 5.827282 1.985277  
2.533651 2.04890464 0.8202645 2.048657 1.549137631 3.438062 6.796669  
5.236377 0.9315307 2.726294 2.449147475 3.530280372 3.430872 3.128344  
2.998524 0.855974264 4.797324383 2.668869728 4.459669 3.120394 2.991888  
4.404809 3.041442 0.9971746 1.47024 7.252402875 9.58471539 1.432063  
4.844455979 9.726037 3.317148966 3.907069 4.906985 2.487038 5.045458 3.564519  
1.54499 4.277205 1.01809 1.731212 5.464685794 9.83305 2.942302 1.627092 2.72969  
4.346577079 1.307255 5.826355 7.284807 4.791011971 3.429055 2.496047 2.299902  
0.954539 3.086233 2.936932 5.360106 4.656157776 5.830956989 7.581472509  
0.6359051 3.657616231 1.033069899 3.031097 2.85506 4.212793781 4.839999  
1.166949 2.48893 6.0302457 1.206197 1.239768 1.15364 3.616328474 2.904542  
2.936255 1.96825 3.315821 2.206623 5.397256 1.931417 1.61364 8.607108 6.706622  
3.890147 1.099492224 1.559112 4.866227 3.604328 2.899044 1.501563 2.961024  
1.333009 0.971916824 1.341394742 2.234386334 0.9500193 3.397529 2.612225  
7.517719 4.927431 3.860023026 1.794362 7.639359 1.099201 1.405843 2.213796  
1.342601081 5.504637 8.767412 2.232101 5.099312 2.725627 6.180941 8.463339  
3.222104927 1.350526 4.226911 2.578408694 0.6966687 3.324265 4.396549  
4.540285 2.401224 4.434750321 4.83928956 2.152583421 0.347867 5.451466  
1.460098 1.839848 4.765297 2.88153 2.179598274 4.533204 3.407215753 0.3802618  
4.442521 1.194709 2.770863 1.50571 4.606702714 5.010301 4.399843 3.283898  
4.530754 3.859826 4.440914 2.543122 4.575806892 3.816648 1.362503417 0.3706517  
0.6277452 2.386792479 7.117271 2.836918 2.541866 3.343494626 1.805438  
4.966458 3.63173 2.265731875 4.153547 0.9320901 1.577736 1.21162 2.285416  
3.367436 2.177244  
AC091185.1 0.2395227 1.064628656 0.5567907 0.871160754 0.638944069  
0.643452515 0.5211973 0.461300952 0.0604684 0.1431842 0.300238298  
2.447593 0.6441343 1.860522 0.5068253 1.204378 1.068332 0.750764164  
0.4472647 0.7008091 0.409987826 0.6320538 1.865182814 3.480612  
1.526402 0.601468173 0.5370658 0.3853216 0.0964605 0.9042458  
0.3546153 0.267224295 1.118495 0.813388925 0.940803 1.739021259 1.397622762  
1.409270497 2.230311 1.402084 0.889781938 1.804401 0.217324845 0.2023084

0.943998507 1.425778 1.008603 0.06655244 0.334768652 0.1601691 1.432027  
1.090867 1.00236599 1.419824 0.390263609 2.323346 0.1516352 2.203911  
0.1165416 0.2258233 0.2330221 0.9796666 1.48467221 0.6219885  
0.6424527 2.14382 0.3407447 0.9526225 1.944699 0.4076369 0.4816448  
1.539565069 0.2114028 0.1087358 0.860334473 0.4475744 0.071128702  
1.411263 0.446109 0 0.5312978 0.1904778 0.7026138 0.400345581  
2.738144226 0.3874435 0.05240026 0.7619199 0.845978195 0.4884476  
0.0259389 0.2560725 1.832514256 0.4882392 1.411774 0.181544651 1.87141  
0.622457225 0.093022836 0.1913527 0.230581088 0.3057563 2.230399  
0.249419358 1.375814 0.2384189 0.195827912 1.472302 2.296189346 0.649610029  
0.227858 0.792579609 0.6683021 1.314454 0.5909614 0.2659382 0.5392274  
0.714458506 0.5974552 0.6995122 0.2886812 0.1687953 0.3960274  
1.21003 0.6233169 0.3198143 0.7164072 1.742878 2.068427 1.009404978  
0.812404349 0.3506645 0.767511294 1.165843036 0.6563383 1.814641815  
0.7690149 0 0.068388067 1.333414031 0.374504118 1.245510438 0.5057018  
0.369375 1.601397 0.9078812 1.210483 1.085402 0.656840908 0.910722 1.594049  
2.028614148 2.397433 0.7316306 0.562642552 2.757856 0.9162672 0.559045526  
1.040341 0.8895689 0.482731517 1.196014 0.8296929 0.2364661 1.384002631  
1.000268 1.002581 0.087328102 0.2426685 0.843349884 0.8900386 0.1558711  
0.53375428 0.5596411 2.041382681 0.2273301 2.937778 0.5259047  
0.2247433 0.1531153 0.92848406 0.8707943 0.3617612 1.766524  
1.764862 0.8544043 0.05203339 1.682726 1.828004 1.00555284 0.074942897  
1.062219 0.4374422 1.303272 0.3904875 1.031795863 0.8389098 1.750696161  
1.596437 0.5021304 0.240542321 1.220529281 0.3768203 0.3073612  
0.879087231 0.773105 0.5011373 0.4772369 1.134964 0.8436297 0.4264587  
0.6442059 0.3667063 0.04578745 1.919356 2.794459 0.1191179 0.1852173  
1.298835586 1.367398 0.9957555 0.292549896 0.2209384 0.2492515  
1.068534 1.071006 0.3651917 0.997957197 1.419071 0.5758064 0.5047991 0  
0.8092237 0.128940383 0.11911 0.6910907 0.4736929 2.151110755  
0.094390474 1.674525 0.4414453 1.365323 1.193551354 1.012512 0.5452119  
0.568420163 0.5515716 1.512744 0.1231455 0.3215995 0.4904681  
0.5113763 1.239405676 0.458957 0.086495969 0.5203936 2.324275 1.701654  
0.4579706 0.5698383 0.4203897 0.8276809 0.561611565 1.913398  
1.214352 0.057225642 1.429056 0.0471794 1.182029 0.6685258 0.6420075  
0.31619 0.8503625 1.956315 2.526774136 0.1395582 0.420873557 1.176432  
1.699748 0.6119623 1.567848379 0.355033177 2.462256 1.267398 2.498601 0  
0.3823649 0.744615022 0.5705864 6.919579 0.5090364 1.561047033  
0.08311844 0.033382 0.382722429 0.06180248 0.792734518 0.2607278  
2.531439 1.95794659 0.3394027 0.5104912 0 1.149322743 0.2884744  
0.21641 0.7451325 1.483156 0.4914413 1.775514 1.526292 0.8060399  
0.2764252 1.842703068 0.03464423 0.443245959 0.6112526 0.533628465  
1.666007 0.1933707 0.276308798 0.6598325 0.09604429 0.1178124  
0.115532391 0.1756213 0.1260595 0.169783135 1.313973272 0.08971043  
0.3299096 0.5736371 0.721271982 1.059667407 1.98324536 0.09964499

0.1118582 0.733375 0.1926282 0.1755539 0.7687208 0.1051175  
0.301673 1.308604 0.3953084 0.6196144 0.490831814 0.8444722 1.045688  
0.7159101 0.3051349 5.881202 0.9207734 0.687307 0.3700117 1.584885  
0.6845441 1.593810144 1.594225 0.1395437 1.647336 0.2840042 0.887899501  
0 2.832886 1.358567 0.3135381 2.452611 0.124369 0.46097 1.48908094  
0.2147202 0.2752883 0.4347434 0.431766 1.056714 1.992418 0.7396672  
1.158405 0.308683586 0.443071069 2.080265 2.051572 0.906103 0.167304061  
1.844930621 0.52164272 0.707918 0.9148427 0.6038469 0.3746179 1.44705  
0.2243941 0.1959307 2.300714927 0.859346876 0.2499136 0.895478275  
5.615106 0.492835016 0.8123982 1.446907 0.4570657 2.133514 2.167516  
0.4665348 1.465547 0.2144292 0.4389276 1.412827616 1.406807 2.048745  
0.3559955 1.085672 1.610330694 0.5520256 0.1241411 0.9723432  
0.347417976 0.8861139 0.5172662 0.08779812 0.1714789 0.9215836  
0.6150393 0.129234 1.160036318 1.095852931 1.397955909 0.2091427  
0.406191885 0.064717374 1.207422 1.854228 0.807264405 0.9285655 0.2545597  
0.1369574 1.915288265 0.1444587 0.04206915 0.125269 0.236661106  
0.2759681 0.7111963 0.3241882 0.5018413 0.7862141 0.882194  
0.367018 0.698656 0.7628719 0.7447953 0.8704467 0.191875672 1.353266  
0.3876873 0.8745713 0.5107854 0.1783343 0.2359018 0.3307671  
0.232800933 0.546211874 0.765593156 0.09162118 1.439932 0.1329613  
0.2717035 1.335109 2.320845698 0.8219912 0.9195936 0.06497295  
0.4830087 0.5466246 0.179738003 0.1372329 1.106828 0.9623699  
1.270648 0.984404 2.078383 0.6081611 0.857367029 0.1157748 0.8538164  
0.257123316 0.1489327 1.500764 2.052833 1.752749 1.055993 1.329435749  
1.495714154 0.184531673 0.03268855 1.026369 0.537536 0.176773 1.632788  
0.1050761 0.614440947 0.570553 0 0.1786632 0.8067078 0.6311119  
0.3840977 0.1694149 1.002158631 0.1684552 0.4260519 0.554446  
0.6149697 0.03251813 0.9624965 0.6004458 1.559934168 1.763337  
0.309106903 0.4244858 0 1.033742507 3.44227 0.3150503 0.4500174  
0.965399533 0.196045 2.391104 2.08965 1.302492923 0.7248478 0.4981518  
0.1027919 0.6645363 0.9664071 1.742579 0.2982842  
AP006284.1 0.3726569 3.743645013 0.5606286 8.093364421 2.846234224  
1.775992808 2.6034 0.436499826 0.1188362 0.3751923 0.48514933  
6.651081 4.196197 4.342864 2.714707 11.70309 2.106841 0.459028015 0.3515967  
1.989394 0.819506111 0.8543891 18.395731901 11.2402 1.972827 3.202625719  
1.195087 0.3155239 0.07723222 5.817274 0.3519754 1.67923246 3.234786  
7.61200554 0.6428155 5.463144634 7.686925189 3.014629177 5.938887  
9.565873 2.871920238 6.341149 0.325409481 2.297179 1.516079889 25.57052  
5.866416 3.836591 0.560439828 0.4896486 2.524348 12.6499 6.441294106  
3.270379 0.588784799 8.222262 0.4569374 16.27564 0.3715451 2.288044  
0.3663593 12.82275 9.997799062 0.2716376 0.3273374 6.611303 0.4570641  
7.811579 9.041753 0.7363763 1.251559 7.290104096 0.3824885 0.09497519  
2.920991517 0.5864002 0.212268285 10.62533 0.6210103 4.250919 0.3480462  
0.6238975 4.033782 0.437101875 35.835238403 0.3468725 0.4061995

4.498275 3.107417956 0.6901434 0.4078135 0.3466827 10.277588114  
1.914189 5.869618 0.812671339 1.132288 6.77664172 0.697401974 0.2924894  
0.525080789 0.1585684 1.095829 3.090819538 13.02058 0.8181123 0.649973736  
6.628161 9.586110076 0.449192708 0.2176807 9.399004765 1.422837 11.19406  
36.73444 1.319038 1.949366 3.202809756 2.318204 15.80932 0.3094547 1.07504  
0.7955926 5.603769 2.301478 0.4888477 3.732124 9.070463 4.282466  
14.889099138 1.325560777 0.9316248 8.314599875 9.020252123 0.3164973  
7.51973159 0.9006824 0.0587758 0.806402216 19.151296432 0.15844405  
3.043501816 0.6920041 1.10232 9.364437 6.627114 16.51667 1.67344 2.394165676  
1.640656 15.91974 4.083053786 3.066266 2.496258 0.368579736 5.80579 0.5486015  
1.106299769 8.524326 7.473934 1.089240346 2.78363 2.993679 0.7687918  
1.662176858 4.921296 5.57531 0.165266086 0.2456793 2.737224934 17.59623  
0.9019639 0.888707499 4.142733 14.140528944 15.39843 38.40559 0.8038642  
2.024363 0.69544 5.662403322 0.8352958 1.82817 10.93179 10.60241 1.315807  
0.05112959 7.442693 5.308221 6.234593951 0.057276457 13.66178 1.021339  
48.03633 2.14022 3.784104925 3.403408 2.07030216 7.179851 4.429712 0.118182083  
3.020532348 0.24685 2.453466 1.297646184 0.3456729 0.695199 0.2501053  
6.502931 1.939395 4.230422 1.183975 0.3002806 0.1149799 11.04724 4.663705  
0.1755733 0.3370372 3.87609495 9.388298 5.642967 0.614862933 0.5582591  
0.993295 2.365459 1.077461 0.6607368 5.855619498 10.0118 0.3772032  
10.62439 0 3.936571 1.23181259 0.511513 13.62198 0.4441692 9.458774508  
0.350392431 4.095316 0.2608335 11.0726 4.788082935 7.524837 7.954953  
0.862317959 2.506708 17.93199 0.1075614 11.06047 0.5288049 0.6270436  
15.358788947 1.002189 0.434411517 1.590881 17.91853 6.409706 0.6363859  
13.41594 1.443257 3.563047 0.22191056 7.871316 11.76686 0.212430672 8.113349  
0.1133242 2.645633 1.509859 9.026693 0.4056334 1.733079 9.868602 6.145670309  
0.6171034 0.465641414 9.633318 8.859971 2.509265 5.799560635 3.436979573 0  
4.990185 8.524117 0.4810486 1.213875 0.478754406 0.1893837 2.810738  
0.1765392 4.110536924 0.6654975 0.2186811 2.579593488 0.07422432  
0.810852389 0.4156117 6.360194 8.748769708 6.139006 2.749643 11.1950882  
3.056440701 0.4913371 0.3012556 6.596487 4.875487 5.699472 7.644255  
8.730206 1.57194 0.4656408 5.439272757 0.3025997 0.193576399 1.004985  
0.73341784 19.02423 0.2181618 3.958003539 2.957122 0.1607888 0.1372042  
0.319553611 0.1994152 0.1307516 0.067969427 6.532997861 0.8554027  
0.8090625 0.597076 11.474897746 4.231156921 13.221249758 0.3807774  
0.2686818 0.04270438 0.2336819 0.4753458 0.9664646 0.7804255  
0.3952441 0.9143994 0.2050111 0.1353004 0.589485355 1.877536  
0.8864922 3.382364 1.099394 3.3953 1.347117 0.5002731 0.4412738  
5.681467 4.409619 12.841523734 5.12508 0.4773804 2.347 0.487267  
13.471043787 2.029366 14.8228 7.858785 0.7655619 10.09069 0.3462582  
0.2444563 5.057261954 0.4792872 0.6940271 0.474657807 0.8828168  
10.49896 2.167712 0.8883347 5.422659 5.293873409 2.109150222 1.088867  
10.48814 2.643729 0.10959869 5.497898636 4.091163166 0.9879844 3.16298  
1.637808 6.016196 5.072777 0.5179916 0.727326 8.833054784 11.317577035

1.200577 7.260436221 5.739698 0.968549213 1.655707 12.66508 1.397283 10.67381  
4.775296 0.9863218 7.228284 0.6087024 0.9148863 4.434806289 9.463923  
0.3453372 0.8097498 1.270017 6.842636495 0.5553522 0.4246878  
2.644807 3.623916308 2.151886 0.8263288 0.4217796 0.6515345 4.457751  
0.8192384 6.960893 13.024943119 28.548978057 8.327897388 0.5088819  
1.929159474 0.183713836 0.7733892 0.03856129 2.611089708 4.514596  
0.2723726 0.5203701 4.592451076 1.179758 0.1286084 0.1230931  
0.757941939 0.9211329 2.829132 0.171077 4.88428 0.572265 2.656375 1.242215  
0.2451859 13.94223 2.888401 1.880179 0.768137513 0.3009745 0.3386252  
3.602153 4.610165 1.068109 0.9958997 0.1111186 0.284675682 0.188324324  
0.159908118 0.1733906 6.547474 0.5516408 3.939498 3.785045 5.478106306  
1.622906 27.45816 0.2317315 0.3046937 0.5151421 0.181522003 1.264586  
25.07885 3.477404 6.760587 0.9420161 8.295514 18.87523 5.633518343 0.2464882  
1.473774 0.301784934 0.320567 8.713239 4.92045 15.82843 2.81831 5.261662579  
7.38755189 0.90663204 0.09993126 11.86273 0.896338 0.347405 4.231966  
0.6711315 4.889777638 1.898124 0.262355003 0.1950665 8.927833 1.016356  
1.934308 0.031709 3.812755454 1.618507 1.216594 1.559668 1.119052 3.237934  
5.005937 1.87551 7.181632405 7.870607 0.581515106 0.2966134 0.3535069  
5.475408552 17.55944 5.824652 0.8844014 3.92965582 0.1337776 6.070699  
13.58372 0.369739926 1.765424 0.1398569 0.3198537 1.167473 6.56528  
5.882365 0.8521701  
AL117209.1 0.6491412 1.240736645 0.1578022 1.414058035 0.298791236  
0.410317546 0.2700406 0.392217235 0.07711912 0.09130585 0.172310676  
0.5722873 0.2567202 1.063687 1.083647 0.8029187 0.3406276 0.229799118  
0.3422548 0.383051 0.321774169 0.6141696 2.458076674 1.17912 0.6839813  
0.560565655 0.4403272 0.03071404 0.2460442 1.020175 0.55505 0.246138964  
0.6022945 0.889170502 0.4451111 0.931510518 0.798400442 0.532542367  
1.027164 1.072899 0.461010207 1.096697 0.118786251 0.8385536 0.485459728  
0.4067436 1.637153 0.3395139 0.12452747 0.357479 1.162225 1.720758  
1.141410548 0.5257131 0.180991818 1.83917 0.05801694 1.210199 0.08917968  
0.3456079 0.2080313 1.286178 1.252149914 0.3966303 0.1170514  
0.4317075 0.07760231 0.4795811 1.602588 0.09452449 0.2149951  
2.097989802 0.1925823 0.06933877 0.495526915 0.2357733 0.060476577  
0.3562245 0.302255 2.715544 0.1693993 0.06073205 0.5973915 0.127646417  
2.146798752 0.1729458 0.1503659 0.7557853 0.520197772 0.5313377  
0.03308149 0.1469633 0.820041976 0.9906304 0.4501309 0.463070413 0  
0.850562668 0.21750267 0.1464264 0.063015949 0.1462313 0.09481888  
0.397625063 0.8959971 0 0.174826078 0.7510875 0.893432553 0.258902548  
0.1271382 0.583168943 0.2983146 2.135421 1.947032 0.07267875 0.305649  
0.589595766 0.3516793 1.045467 0.117146 0.1076376 0.2188673 0.3697313  
0.7588205 0.3787449 0.2773668 1.111401 0.4396656 1.641380269  
1.280746953 0.4099556 2.039281215 0.522414584 0.296462 1.13086374  
0.468096 0.2360083 0.152634236 1.508584364 0.164184776 0.434940153  
0.3654733 0.1766576 0.4153955 0.2205481 2.816401 1.929603 0.886039575

0.490008 0.9589574 0.59056064 0.3548995 0.6269226 0.358786555  
0.8537054 0.3769589 0.378773599 1.200448 0.5672613 0.119711197  
0.8742866 0.9321877 0.1005266 0.383718436 0.518255 1.065545 0.129937466  
0.02813548 1.173356361 0.5239023 0.1242451 0.234000971 0.2676544  
2.338330994 0.2899283 1.396808 0.2422041 0.2687148 0.01952775  
0.507494393 0.158654 0.09886641 1.339022 1.465662 0.9176211 0.1327229  
0.9360584 1.820102 0.660653073 0.095579347 0.8805645 0.3433214  
2.517659 0.5478143 0.568235403 0.7038907 0.840914098 0.4894315  
0.8645375 0.102259538 1.253941516 0.3276698 0.108888 0.695115933  
0.09390372 0.1691819 0.9738399 0.8024131 0.5678538 1.204326  
0.7017799 0.2923022 0.1897857 0.6466083 1.043728 0.05696945  
0.1574794 0.404918791 1.777465 0.6954483 0.186553557 0.2415227  
1.258299 0.6343923 0.3170889 0.2661439 0.533736809 1.529737 0.1502104  
0.5942785 0 0.5446949 0.185001419 0.1265904 0.2056579 0.1421483  
0.826791825 0.120382054 0.6264505 0.2152657 0.485939 1.435226969  
0.9796221 0.4424909 0.248006356 0.2857781 0.4363884 0.07852759  
1.196288 0.0977382 0.3762635 1.66850748 0.5853365 0.05515685  
0.2042124 1.808721 2.251609 0.2389412 2.081149 0.2829676 0.3518643  
0.682150693 0.6318571 1.032493 0.036491714 1.161438 0.1805125 0.3140656  
0.7064505 0.4776288 0 0.2711301 2.675808 1.859164916 0.1557388  
0.304167556 0.6251573 0.9440398 0.737114 0.999787372 0.729504563  
1.067691 0.4293542 1.034617 0 0.2813387 0.184654933 0.2619736 1.32849  
0.1527543 0.55628104 0.1060061 0.04257414 0.097621953 0.05911541  
0.133029439 0.09975671 0.8946451 0.739878905 1.082153 0.8370788  
3.91197124 0.889951772 0.1103728 0.1552507 0.6929372 1.073589  
0.5048946 0.6981972 0.7705194 1.116613 0.3021791 0.671461159  
0.1104599 0.131903145 1.192281 0.20016754 0.62493 0.06165442 0.828125498  
0.3606538 0.06124563 0.100169 0.147345658 0.04479616 0.2009645  
0.108267507 0.547855077 1.449235 0.11328 0.08535277 0.657059362 0.579197092  
1.339071036 0.06354173 0.1426597 0 0.109187 0.1791158 0.2228176  
0.06703143 0.05771137 1.034746 0.1575505 0.1889687 0.18779652  
0.913825 0.07844892 0.9545468 0.2334945 2.620095 0.176148 0.2434904  
0.3266993 0.7748328 0.3492167 1.76304346 1.524911 0.0889844  
1.377672 0.1034881 1.155041438 0.2653584 6.128306 0.6300599 0.1999373  
2.536706 0.09913474 0.3219473 0.28284732 0.2282051 0.1436287  
0.342457717 0.2002393 0.1443956 0.8693083 0.163271 0.415515 0.151416697  
0.828778348 0.3706525 1.71868 1.794883 0.053343324 0.484431911 0.221761156  
0.1766449 0.1555675 0.445861 0.9121131 0.9726349 0.3066255  
0.2915298 1.138662287 0.445241316 0.1328043 0.595857 1.868164 0.174595336  
0.4748801 0.4217898 0.1714483 2.207037 0.8515241 0.8248877  
0.6094904 0.164085 0.2798958 0.495513454 1.035109 0.04584022 0.1324234  
0.27198 0.804849967 0.3394443 0.3430372 1.06486 0.766875799 0.3424595  
0.1041634 0.3359232 0.3061767 1.246586 0.130733 0.1922902 1.264705326  
1.86347938 1.058597047 0.2476804 0.129510456 0.103172626 0.8726102



0.08445761 0.595211255 0.4592019 0.1460952 0.08733514 0.563696881  
0.1105423 0.1609602 0.07988165 0.100609553 0.1759797 0.1577449  
0.1550465 0.2514402 0.143244 0.4737335 0.2173233 0.2704941  
2.749608 0.8358978 0.675082 0.142748085 0.7191269 2.087643 0.423081  
0.9771546 0.1462119 0.08357229 0.1460243 0.089071661 0.109992323  
0.212262753 0.1363252 2.214524 0.135659 0.3118683 0.8658039 0.751725499  
0.3494456 1.846098 0.1657281 0.1711142 0.201805 0.186250249 0.5250652  
1.992857 0.3652888 0.5138286 1.624728 1.576994 1.758085 0.944346293  
0.2214822 0.9074377 0.307430052 0.2170779 0.3096206 1.156837  
0.6583684 0.2618726 0.826562226 1.044625758 0.382435206 0.02084488  
0.8980292 0.3583573 0.2254496 0.5885033 0.1172589 0.848937734  
0.2996255 0.246263353 0.06835809 0.561188 1.00612 0.5204802 0.1080327  
0.958586516 0.4296828 0.1671909 0.3951551 0.5415468 0.207362  
1.394922 1.082089 0.298422189 2.725354 0.90974607 0.07218309 0 1.11556605  
1.357776 0.3348361 0.05739352 0.457766557 0.04688034 1.069609 1.209528  
0.913632717 0.2133331 0.2042113 0.06554846 0.01926192 0.5021375  
0.856178 0.2694645  
AC132192.2 0.6202113 1.757535062 0.2563082 1.184839386 0.862769463  
0.651642931 0.8247368 0.325605276 0.2505195 0.01647804 0.497552709  
1.614942 0.4818372 1.343751 1.029298 1.071025 0.3534717 0.359424253  
0.192164 0.2304317 0.159694809 0.2493893 1.65996392 1.502095 1.823094  
0.575047299 0.7770029 0.399095 3.419091 1.168709 0.5490817 0.123011707  
0.6865046 2.28223013 0.3492589 1.056694208 1.25993194 0.937056349  
0.4990815 1.563359 0.895987915 1.375718 0.128624694 0.7799544 0.532676718  
2.24534 1.920479 2.297713 0.231156733 0.1105963 0.4794232 4.929101  
1.664409439 0.885508 0.293973634 2.249656 0.2512887 2.874499 0.09656597  
0.6445119 0.4505229 2.387495 2.888089755 0.3400059 0.1408291 1.29851  
0.06722376 0.6924031 1.294605 0.187648 0.2217162 0.524251224 0.1251197  
0.06673932 0.98370949 0.3224856 0.469313005 1.042144 0.3850461  
1.446892 0.2934876 0.1315243 0.8085879 0.184291601 2.417591118  
0.6242334 0.1929718 2.117404 0.709319368 0.3967901 0.3343336  
0.4833005 0.725168767 1.062463 1.403749 0.640708584 1.794726 1.55548409  
0.114190195 0.2642569 0.106143692 0.1055619 1.540083 0.344446611  
1.617013 0.2038245 0.126204004 0.9488455 2.293169518 0.26165635  
0.1311127 2.161029884 0.4306965 2.477965 3.513825 0.2623278 0.6205582  
0.928623846 3.152236 1.096838 0.2536971 0.1683538 0.1823038 0.9167532  
0.9781782 1.871804 0.7066814 1.288545 3.138607 1.533380326 0.96610247  
0.376651 1.315096364 0.986319856 0.2769553 1.63270301 0.5310024  
0.07744109 0.33055226 1.99983979 0.226269707 0.655254215 0.8225259  
0.4109176 0.9745678 1.711507 1.551189 0.6207703 1.035016697 0.3537286  
0.9137769 1.461654135 3.980891 0.6525354 0.388502965 0.9120878  
0.1904842 0.38601923 0.8893881 5.908448 0.45677821 0.7385597  
1.400423 0.193516 1.357299423 1.007245 1.338406 0.09379967 0.1320184  
0.299988451 2.50555 0.1255666 0.322486239 0.4637166 2.923549507

3.285921 2.467448 0.1748431 0.5172819 0.3947092 1.648582484 0.272008  
0.26169 2.05598 1.4548 0.6210143 0.0718578 2.472164 0.7233838  
0.757452183 0.155243525 1.515816 0.3097975 2.523263 0.8807927 0.852783328  
1.28048 1.015224975 1.596972 0.4854073 0.193776029 0.546240945 0.3311551  
0.1729298 0.437045077 0.1694688 0.5970778 0.7908735 0.9994876  
0.453074 1.191896 0.7907951 0.1899072 0.2002353 1.100257 4.888232  
0.9321731 0.07105109 0.943344928 1.609955 0.2619299 0.387175887  
0.5956999 0.4971991 1.204258 1.373407 0.540351 1.437449049 2.301903 0.27711  
2.448873 0.07568191 0.8691923 0.163227058 0.8772811 2.460211 0.2693629  
0.705364762 0.130352669 1.418339 0.1793039 0.4092564 0.722106745  
0.8036053 1.038137 0.688583137 2.158198 2.006189 0.05668774 1.406402  
0.4233334 0.3440498 1.378798293 0.2867267 0.079633604 0.4883205  
3.318617 0.646243 0.2587314 0.6200159 0.2795268 0.3991506 1.304947733  
1.730137 1.560554 0.171227902 0.5546487 0.05429538 0.8161873 0.3604994  
0.8537711 2.401611 0.3751381 1.709746 1.055785231 0.192729 0.258321695  
1.760033 0.7445871 0.313006 0.99598696 0.544776279 0.9521009 0.5651912  
1.389184 0.6084615 0.2030937 0.228513067 0.5253175 3.048296 0.2481092  
1.373791839 0.1658021 0.04610034 0.50504679 0.08534884 0.480158566  
0.1320233 1.319738 0.433961232 1.132723 0.3357073 0.4034266 1.379359067  
0.1593526 0.2365982 0.8003515 0.5535756 0.8043584 2.206776  
1.561333 1.34344 0.3090288 1.181496499 0.1435304 0.285655983 0.8275844  
0.765837169 1.278192 0.2670437 0.483335633 1.30175 0.2063236 0.2350085  
0.319099054 0.161688 0.101551 0 0.907294535 0.3716687 0.3971925  
0.4048968 1.486202973 0.499412314 2.506137016 0.5045668 0.1716395  
0.02250636 0.09852532 0.193951 0.3002502 0.1774258 0.4443825  
0.6023915 0.06823982 0.2852279 0.361512395 0.4122968 0.3114702  
0.4893405 0.1404631 1.780143 0.9748799 0.439429 0.3013495 0.9849227  
0.5829666 1.242765257 0.7134864 0.7280119 0.6215741 0.1494126  
1.013645268 0.8726521 4.374399 2.467451 0.02624207 1.129014 0.1717529  
0.2223036 0.802146404 0.1317899 0.2534477 0.12949329 0.2710301  
0.8338942 1.190715 0.1833418 0.4999221 0.480942731 0.489502754  
1.830727 1.37031 1.020582 0.115522943 1.815126367 1.360728001 0.7792707  
0.8562991 0.3072296 0.2665111 0.7921453 0.05902607 0.255547  
1.865264907 3.510810341 0.1725645 1.003657998 3.970866 0.453734766  
1.106335 1.370173 0.4826861 3.38287 1.051228 0.3904738 1.613263 0.1776753  
0.2571572 1.642181149 1.519362 0.1985477 0.1911885 0.4462223  
1.622814466 0.3085678 0.3619248 0.5838261 0.528990525 0.5933178  
0.3759692 0.3839541 0.06314967 0.5013672 0.4058079 1.388111  
3.066199435 2.228011364 1.56858697 0.2750713 0.358383773 0.104270015  
0.7040312 0.2438741 0.452898557 1.474259 0.2226455 0.2017465  
1.678558584 0.5319909 0.2904862 0.1441631 0.199727943 0.2903697  
0.8682843 0.3233403 0.7755445 0.3102162 1.709901 0.156882 0.1033757  
1.664259 1.53598 0.5306486 0.191373818 0.5191256 0.495735 0.5969476  
0.8464698 0.2814612 0.2413177 0.163975 0.150031778 0.264672023

0.229843364 0.1687044 0.8578001 0.1713775 1.050618 0.6354261  
1.950177147 0.3153236 2.508549 0.1894242 0.07411468 0.4502825  
0.103423785 2.337387 1.708349 0.949305 0.9273105 0.7996799 2.046707  
5.953722 0.215276115 0.2797975 0.4679029 0.192338104 0.1273227  
1.137869 0.6043498 1.094215 1.32329 0.856773239 1.081966348 0.424728523  
0.240761 0.3955559 0.2811871 0.09299901 1.421549 0.4716059 0.54997911  
0.3707907 0.237031161 0.08224426 1.147818 0.817089 0.696198 0.11141  
0.372608641 1.163178 0.3771635 0.3603231 0.6875038 0.793363 0.8055768  
0.5648256 1.436173044 0.9355408 0.295528671 0.5080506 0.1568907  
0.683291942 2.760771 0.9668501 0.2900199 1.093916606 0.1692106  
1.675693 2.471424 0.704504454 0.3721705 0.1637963 0.2602508 0.097334  
0.8567818 0.9073654 0.2975041  
AL031186.1 0.9033427 1.258674274 0.0848443 1.031816373 0.525759691  
0.176489833 0.2680443 0.253056522 0 0.04909172 0.123526614 0.8951196  
0.1472307 1.979669 1.063055 0.9009373 0.3662853 0.205923885 0.4907133  
0.4576713 0.216257315 0.6604317 1.961106501 0.969599 0.6789249  
0.697967462 0.6313263 0 0.1322887 0.8108401 0.4421177 0.447918818  
1.090799 1.487339749 0.7075532 0.858579639 1.158030288 0.680028938  
0.9346065 0.8973341 0.686403209 1.275969 0.085155858 0.7283102  
0.501145751 0.4116531 0.8173614 1.277807 0.038259275 0.05491513  
0.3570769 2.755876 1.325577881 0 0.583874905 1.098725 0.1247741  
0.9235435 0.1278628 1.114922 0.1917439 0.9483831 0.394088107  
0.1599399 0.1258683 0.7737096 0.1668954 0.2750429 0.82062  
0.2541113 0.462379 1.330473453 0.08283539 0.09941558 0.608974079  
0.2935643 0.227611846 0.7257922 0.1529517 1.877202 0.3643185  
0.1306134 0.883286 0.594799149 1.292763176 0.3188107 0.179658 0.4644083  
0.538663667 0.1970209 0.1422934 0.140474 1.102264214 0.3347926  
0.5033984 0.663934722 0.2138754 0.731704819 0.255148351 0.0524853  
0.135525211 0.1048307 0.560786 0.427576042 1.364941 0.09342127 0.214851195  
0.8413155 0.533738928 0.445446877 0.2734296 2.382964627 0.3666114  
1.115945 0.8779999 0.1563065 0.5751759 0.46109591 0.8193671  
1.588892 0.2159485 0.1157454 0.1448329 0.5531565 0.4274173  
0.5639175 1.719377 0.5794504 0.7354406 1.245894145 0.711820954  
0.2805316 1.578880375 0.691403438 0.2250303 0.735283437 0.4793859  
0.09228565 0.093789349 0.648887196 0.385204236 0.528706472 0.2311779  
0.8442857 0.4839088 1.007933 1.794693 0.9472597 0.831517281 0.7415879  
1.56741 1.088647592 0.4697011 0.3762672 0.308649628 0.6976879  
0.121606 0.431263691 0.7473466 0.2904715 0.220677265 0.5200786  
0.7585764 0.1080988 0.536408473 0.5572924 0.733316 0.039921418 0  
0.210289841 1.408413 0.6412983 0.320252568 0.4988801 3.680969406  
0.4988272 2.261868 0.1602757 0.4623291 0.2939814 0.727628325  
0.1706046 0.1771891 1.919845 1.350911 0.863398 0 0.5892098 1.011587  
0.668627343 0.051389415 1.602434 0.09229551 0.841103 0.2142103 0.739677034  
0.6660817 1.496699055 0.8420765 0.1377272 0.164943306 0.697445303

0.1879208 0.140508 1.109156918 0.6058619 0.2829952 1.090827 0.5752364  
0.6749038 0.8772864 1.2516 0.1257279 0.06279421 1.042971 1.313966  
0.08168087 0.2963476 0.712504093 0.7933912 0.8453761 0.150454232  
0.3462871 2.164927 0.7579752 0.4196597 0.1430955 0.618089619  
0.9730771 0.3230499 0.90531 0.2254731 0.6165514 0.132624394  
0.2722515 0.6318544 0.1146416 1.010306421 0 0.7042576 0.178062  
0.6531777 1.07565771 0.8618824 0.8836682 0.492345885 0.5673308  
0.5927485 0.126664 1.359906 0.336321 0.2157896 1.274817267 0.3596724 0  
0.7960306 1.296642 0.6417668 0 1.278806 0.3523266 0.3783684  
0.770210146 0.3748698 0.8326985 0.078480881 0.3458555 0.03235159  
0.3602374 0.3667342 0.5869783 0.108408 0.340145 1.827514 1.119555309  
0.1913941 0.307838944 0.6722471 1.090346 0.6061341 1.161103714  
0.865604698 0.405217 0.7604391 0.8455377 0 0.201687 0.113465146  
0.1878044 0.9183588 0.2463907 0.566699427 0.265979 0.1373431  
0.06998353 0.1695154 0.514979416 0.2145417 0.7528961 0.944786926  
0.4266776 0.5667494 1.20189692 0.900693741 0.07912442 0.2225931  
0.8515799 0.8795861 0.524204 1.298662 0.9884558 1.982143 0.1083135  
1.173312974 0.04751209 0.121576034 1.923134 0.129147057 0.761603 0.1767961  
0.644194225 1.16346 0.08781192 0.2154284 0.316888844 0.2890225  
0.1296612 0 0.554467842 0.7381887 0.2436255 0.1573405 1.318897338  
0.415216617 1.866583868 0.06832799 0.2556759 0.2011543 0.1761172  
0.09630383 0.3194684 0.2402685 0.2482338 1.435726 0.3727194  
0.3694595 0.134628155 0.5966141 0.2530742 0.6842985 0.1673883  
1.767813 0.1262775 0.2880144 0.5074446 0.9056488 0.1877607  
2.00736438 1.457577 0.06379142 0.9259032 0.1947457 0.681906817  
0.3804619 2.409746 0.5420151 0.3127237 1.517714 0.04264081 0.1505208  
0.130351158 0.3271927 0.1372866 0.210430419 0.05383056 0.7246035  
1.198447 0.3121233 0.7943351 0.358208644 1.012733873 0.7971435  
1.489545 1.216216 0.114722784 0.843396855 0.536546797 0.2110563 0.2509283  
0.740961 0.6538785 0.9118088 0.1318888 0.3582734 1.224431654  
1.620482681 0.2856155 0.640739735 1.674069 0.525690684 0.371382 0.6803415  
0.2581077 0.7802567 1.167804 1.134225 0.7864801 0.3528893 0  
1.307874708 1.261488 0.1478793 0.203426 0.2658789 0.895318996 0.5137218  
0.3405012 0.8116952 0.623061688 0.1841276 0.07467301 0.2408177 0  
1.148987 0.337393 1.595117 0.975072002 2.379566364 1.37798511 0.08194981  
0.04642193 0.088755256 0.5519643 0.1210925 1.003314332 0.6237362  
0.0698221 0.4507854 0.808209554 0.03962296 0.1153897 0.1717974  
0.37865777 0.1622017 0.4240673 0 0.5407596 0.4107568 0.8914803  
0.2516695 0.1710994 1.637569 0.8580042 0.6775369 0.131571889  
0.4124239 3.54457 0.5790265 0.8873072 0.2096337 0.1437878  
0.2442588 0.159634925 0.157703278 0.045650275 0.04188397 0.7550565  
0.07293876 0.8197682 0.8999863 0.606261733 0.1409128 0.8874808  
0.02970192 0.220804 0.1578225 0.061624458 1.016308 1.071484 0.2199703  
0.85005 1.786817 2.236986 1.167669 0.748247589 0.2778595 1.059429 0.132234848

|             |             |             |             |             |             |             |
|-------------|-------------|-------------|-------------|-------------|-------------|-------------|
| 0.08753597  | 0.4237452   | 1.21124     | 0.8561375   | 0.2815981   | 1.002774393 |             |
| 1.025632563 | 0.632680021 | 0.1793201   | 0.6874282   | 0.2010524   | 0.1731654   |             |
| 0.4867939   | 0.03602611  | 0.795847322 | 0.2301390   | 0.1470143   | 0.6034593   |             |
| 1.406478    | 0.2304586   | 0.265532    | 0.792916719 | 0.7700808   | 0.2247307   | 0.1341853   |
| 0.2409677   | 1.917641    | 1.319995    | 1.181498    | 0.820079677 | 1.926435    | 0.358699879 |
| 0.1552405   | 0.233706    | 0.617973543 | 1.362713    | 0.288046    | 0.18515     | 0.475273616 |
| 0.03360772  | 0.6852119   | 0.8376972   | 0.491225902 | 0.07646746  | 0.04879855  |             |
| 0.1057288   | 0.1657026   | 0.5399608   | 1.018613    | 0.6817925   |             |             |
| ZNF32-AS1   | 0           | 1.473866972 | 0.07526511  | 0.433573094 | 0.31093315  | 0.407065259 |
| 0.6737136   | 0.187071354 | 0.1471305   | 0.1306473   | 0.328740183 | 0.3308574   |             |
| 0.1959118   | 0.9756434   | 0.290164    | 0.2664062   | 0.1624652   | 0.365348828 |             |
| 0.1813793   | 0.3653988   | 0.2302094   | 0.3295501   | 0.83202625  | 0.5293096   |             |
| 0.5018934   | 0.506589287 | 0.3111375   | 0.1757919   | 0.4694114   | 1.311653    |             |
| 0.07844024  | 0.144489941 | 0.8164501   | 0.565463269 | 0.5907465   | 0.677016203 |             |
| 1.062708551 | 1.174752877 | 0.4522289   | 0.8718338   | 0.642734188 | 0.6860051   |             |
| 0.22662446  | 0.153829    | 0.629800104 | 0.5477642   | 1.282832    | 1.700308    | 0.407276148 |
| 0.2435752   | 0.538495    | 1.606536    | 0.871048787 | 0.222883    | 0.388465159 | 0.5848053   |
| 0.1844778   | 0.7820328   | 0.3969934   | 0.3296812   | 0.1133969   | 0.6309807   |             |
| 0.932251437 | 0.5202346   | 0.03721912  | 0.5948413   | 0.4145465   | 0.4574806   |             |
| 0.8371648   | 0.3155898   | 0.1757892   | 0.64144495  | 0.4408981   | 0.1322869   |             |
| 0.810328411 | 0.6155381   | 0.201913734 | 1.216157    | 0.2374451   | 0.3083814   |             |
| 0.2585486   | 0.1738      | 0.8547929   | 0.487056375 | 1.146806043 | 0.2356799   | 0           |
| 1.235925    | 0.477846801 | 0.3145978   | 0.284013    | 0.1869211   | 0.508463815 | 0.4319905   |
| 0.8244241   | 0.736217938 | 0.4268884   | 2.704554104 | 0.414959011 | 0.1396786   |             |
| 0.160298636 | 0.09299499  | 0.4974714   | 0.227580797 | 0.9971581   | 0.3314948   |             |
| 0.381187605 | 0.4179438   | 0.75756493  | 0.230506785 | 0.2425585   | 1.520539116 |             |
| 0.2845673   | 3.007928    | 5.092617    | 0.2310983   | 0.2186729   | 0.204518347 | 2.180574    |
| 0.664859    | 0.3192787   | 0.1369031   | 0.160601    | 0.3680275   | 0.7238518   | 0.2223331   |
| 0.342404    | 0.4176482   | 1.584417    | 1.228031863 | 0.905999321 | 0.3910636   | 1.193120475 |
| 0.690009479 | 0.3992472   | 0.551918709 | 0.4677878   | 0.2455989   | 0.124800343 |             |
| 1.779206829 | 0.142380598 | 0.541169776 | 0.2871081   | 0.2621371   | 0.7925057   |             |
| 0.6311537   | 1.631868    | 0.6802518   | 0.43028784  | 0.311618    | 0.6586314   | 0.643823845 |
| 0.6250055   | 0.4728626   | 0.239576828 | 1.042386    | 0.431505    | 0.340064559 | 0.4821591   |
| 0.9276347   | 0.293643135 | 0.5678277   | 0.8651965   | 0.1917881   | 1.281124456 |             |
| 0.532401    | 1.097756    | 0.070828323 | 0.1073557   | 0.51300546  | 0.9162255   | 0.04740781  |
| 0.28409502  | 0.4085122   | 1.241762737 | 1.216897    | 1.25406     | 0.1066351   | 0.1708878   |
| 0.26079     | 0.484107555 | 0.4540284   | 0.09431035  | 1.094842    | 0.9487242   | 0.1641252   |
| 0.0633033   | 1.001815    | 1.092457    | 0.593137159 | 0.091174769 | 1.8092      | 0.4503127   |
| 2.238419    | 0.4275568   | 0.39940485  | 1.128042    | 0.774501527 | 0.3735017   | 0.9163301   |
| 0.463348803 | 0.453714418 | 0.1667039   | 0           | 0.171118178 | 0.3583054   | 0.645542    |
| 0.3870677   | 0.6303587   | 0.3706269   | 0.1852948   | 0.653112    | 0.278832    | 0.08355682  |
| 0.9252161   | 1.214182    | 0.434753    | 0.262889    | 0.632060082 | 0.4158905   | 0.2307478   |
| 0.266934928 | 0.4991841   | 0.1263487   | 0.8068768   | 0.3257439   | 0.4442886   |             |
| 1.05744595  | 0.6987919   | 0.3184183   | 0.7086155   | 0.1500124   | 0.4375526   |             |

0.117650672 0.2898161 0.6726192 0.4406923 1.003788315 0 0.5975818  
0.1579582 0.733947 0.414874993 0.3398103 0.6632993 0.291172298  
0.6710365 0.6572816 0.0374544 1.825855 0.4102302 0.430709 0.837693544  
0.1595321 0.105230119 0.2678523 1.965005 0.7763308 0.1266278  
1.449543 0.1420672 0.7192487 0.325357588 0.6235234 0.9849122  
0.17405034 0.3749867 0.08609696 0.3994568 0.4182798 0.6942754  
0.6731788 0.2155297 0.6553714 0.520223473 0.2122313 0.375489035  
0.4174438 0.567004 0.4136151 0.610377102 1.151812703 0.7189333  
0.4336605 0.7895513 0.1072051 0.1431327 0.452945543 0.1388339  
1.991423 0.2185724 0.837862056 0.2696561 0.1624488 0.155205409  
0.3759413 0.406076959 0.2220391 0.4081561 0.705783102 0.6193708  
0.5027616 0 0.549314227 0.4913371 0.1974617 0.7554338 0.7315106  
0.3321569 1.152038 0.644747 1.082063 0.0960846 0.680550639 0.08429564  
0.431398832 0.3062062 0.229131875 1.033294 0.196044 0.437000826 0.3440338  
0.1947442 0.1433294 0.281111071 0.1709273 0.1533628 0.137704294  
0.491866634 0.1455211 0.1852452 0.5815676 1.211774916 0.122779107  
1.277362693 0.1818406 0.2268093 0.7732544 0.3385049 0.1708616  
0.2550595 0.2557697 0.5505186 0.3820883 0.03005801 0.1966478  
0.358284605 0.3735914 0.1870844 0.712611 0.1484896 2.940415 0.5601018  
0.3484045 0.311644 0.2570874 0.2498428 0.633147188 1.508514 0.2829458  
0.9199297 0.2221178 1.641918488 0.4500087 4.406235 0.6611273  
0.06935404 1.346359 0.1134796 0.347169 0.501081065 0.08707548 0.1826798  
0.186672146 0.2387646 0.3673106 0.5953576 0.03461044 0.3816866  
0.144438969 0.610907207 0.483835 1.125612 0.4690875 0.101770212 0.352082179  
1.110594177 0.2621183 0.2967969 0.3479846 0.8700803 1.094344  
0.311995 0.1589116 0.835530285 1.176156784 0.2026949 0.521031639  
1.683069 0.46633851 0.5353592 0.6538228 0.261676 0.9805645 1.177222  
0.1805941 0.5814033 0.208698 0.3398149 0.472678732 1.777334 0.5247332  
0.1804585 0.3773765 0.317693837 0.3118091 0.1510288 0.6171876  
0.260101654 0.5553525 0.1656055 0.3204429 0.3337911 0.5096315  
0.4988337 0.4192661 1.138135825 1.925738483 1.062961866 0.1453948  
0.247084465 0.078734501 0.2448229 0.8056555 0.521745774 0.48415  
0.2787253 0.1999452 0.537720066 0.175747 0 0.3810024 0.191946335  
0.2398143 0.6771398 0.2300691 0.4797061 0.4554762 0.5083902  
0.1275744 0.1214254 1.008807 0.3261998 0.6582828 0.194528331 0.18293  
0.1572188 0.2568263 0.497133 0.1549712 0.1275536 0.4024079  
0.113289302 0.349745173 0.080992424 0.1114654 0.4637134 0.06470374  
0.7272137 0.7157844 0.985990185 0.3333421 1.325948 0.2107878  
0.261166 0.2450066 0.164000574 0.5342599 2.019834 0.3066406 1.093411  
0.17612 1.472314 1.381114 0.331884011 0.07042521 0.2967841 0.547423834  
0.1035372 0.4296035 0.8131251 0.9347407 0.4639231 1.132164638  
0.693207877 0.448998725 0.03976856 0.7550095 0.2675294 0.3993975  
0.7772999 0.3195864 0.290703244 0.2041556 0.104406583 0.1304159  
0.7583797 0.2399388 0.2628503 0.1177763 0.515822166 0.6148226

0.2392294 0.4364628 0.676912 0.1186837 0.7451586 0.222325 0.854010042  
0.4363236 0.376056325 0.03442834 0 0.386966355 0.5180822 0.5110493  
0.2737433 0.57219001 0.1192532 0.9551917 0.547561 0.713069858  
0.2035021 0.3463123 0.1563195 0.0734971 0.7838141 1.042625  
0.3326488  
DICER1-AS1 1.095807 1.239466133 0.3686009 2.218861887 1.40190028 0.730237352  
0.7116402 1.033948701 0.574726 0.6347498 0.366287497 0.8873235  
1.203122 1.114886 1.865114 1.692989 0.8714283 0.545294415 0.7529237  
0.3881967 0.952938265 0.5678635 3.034003983 1.249822 1.199717 0.774477597  
0.9976964 0.444124 1.409432 1.011404 0.4710419 0.745528501 0.9167536  
2.005530996 1.046167 1.743319753 2.094181123 1.044016259 1.612711 2.430983  
0.784954055 2.083763 0.488868294 3.00984 1.075638936 3.268091 2.633966  
2.860646 0.633200245 0.4941919 0.8938435 4.345206 1.371164654 1.455386  
0.754943036 2.693529 1.032521 3.499887 0.4662166 1.236556 0.6809604  
1.442885 3.11845244 0.5018354 0.8462799 1.445907 0.2693105 1.728347  
1.506693 0.1682241 0.7857461 1.047130445 0.5740835 0.3239287  
1.019677765 0.4223635 0.517966775 1.418088 1.028376 5.595142 0.5351233  
0.3512734 0.8721322 0.45434168 3.744220052 0.632068 0.4683079 5.52036  
0.852926814 0.5298707 0.2833347 0.4940369 1.737620916 0.7461324  
0.9893496 0.858459391 0.4037458 3.115774217 0.620218888 0.3583158  
0.238316095 0.4933831 1.102136 0.778413558 1.295609 0.4445166 0.361139922  
2.353152 2.258065564 0.472284992 0.3070757 1.305972535 0.8058409  
5.420875 2.997041 0.7114004 0.9604294 1.418935324 3.546651 2.970766  
0.5770521 0.8500535 0.5543107 0.5972125 1.366541 1.114771 0.6932548  
1.884294 2.803843 2.341212062 0.745904477 0.5845036 2.631231625 1.086180961  
1.082376 1.737609734 0.8776935 0.3484267 0.431715749 3.221772002  
0.235750443 0.727782717 0.8226009 1.432246 1.948296 1.441236 3.615365  
1.642392 1.440689701 0.589449 1.582914 0.825796624 2.708637 0.6389482  
0.38710775 1.602893 0.7295704 1.100367416 1.307154 3.040664 0.875021127  
0.9641972 1.602956 1.367886 0.977399517 1.906745 1.422253 0.668967987  
0.8293239 1.103922793 2.11243 0.5914895 0.634137944 1.313909 3.544783205  
2.405766 2.654045 1.119066 0.785092 0.6168713 1.434742007 0.4500029  
0.3628997 2.780216 2.008717 2.156175 0.1291748 1.940155 3.27561 1.448082542  
0.605986413 3.209604 0.9451486 1.294168 1.329462 1.530229221 0.8956849  
1.967466937 1.415433 1.716687 0.457818862 1.115812547 0.4665201 0.4699329  
0.892899435 0.7207022 1.016182 0.9162128 0.822526 0.861007 2.337781  
0.536896 0.6697662 0.2403287 1.464138 2.423824 1.056124 0.6218364  
1.039999033 1.592858 1.399118 0.409821375 0.5641587 1.113797 1.280602 1.84489  
0.7141801 1.388293717 2.410906 0.5829228 2.08221 1.020369 1.154336  
0.589897055 1.047605 1.594745 0.5731569 1.835109508 0.361534283 1.960554  
0.3462688 1.148589 1.514171113 1.436342 1.810537 1.044019318 1.711621  
2.580269 0.3712232 1.840081 0.4305103 0.4799028 1.846121727 0.7905884  
0.515350513 1.093143 4.437247 1.303535 0.481349 1.859247 0.9873096 1.252418  
0.717027984 1.546199 3.194118 0.531727998 1.283923 0.3413344 0.8616976

0.6448886 0.9562842 0.3756562 0.6986589 2.389096 2.707647423  
0.8908926 0.533362813 2.378151 2.084564 0.7909583 1.169896278 1.068851449  
1.634694 1.269782 1.50526 2.475107 0.671766 0.299286425 0.5245102 1.446022  
0.3440666 1.647840399 0.6406507 0.2841326 0.734761254 0.4821988  
0.467583108 0.2515091 2.171954 1.810536556 2.832672 0.8000452 13.053918  
1.694472449 0.5401804 0.7751688 1.1187 1.120235 0.7901087 1.570008  
2.745576 1.245957 0.6218135 1.148312237 0.2948762 0.398230652 2.096386  
0.654583351 1.876805 0.5486283 0.874091968 1.034094 0.1680388 0.3286846  
0.513532477 0.298962 0.2861233 0.268952543 1.362148128 0.9714372  
0.6624101 0.5072419 1.17910556 1.89336137 2.476909652 0.4099312  
0.7405122 0.1109717 0.2914782 0.9264263 0.5749916 0.546769  
0.6890011 0.9133368 0.2838956 0.3974519 0.689327259 0.6969959  
1.086376 1.341802 0.7618371 3.142921 0.5224808 0.39542 0.6379502  
2.454401 0.8011483 2.662403488 1.777834 0.5014876 1.287209 0.4460524  
2.040498972 1.60698 2.177225 2.01135 0.2385652 1.561422 0.7410015  
0.4484081 1.218000008 0.4636695 0.5076784 0.576817933 0.7572725  
2.805357 1.50247 0.5044644 1.201667 0.670317896 1.680289296 1.397408  
2.368221 1.837835 0.249203039 1.637035509 1.04216423 0.8121301 1.449197  
1.302953 1.96146 0.787821 0.6502899 0.6346429 2.474624302 2.140978931  
0.6204195 1.717691477 2.020247 0.737972548 1.229293 1.483715 0.8848614  
2.589413 1.53192 1.110057 1.157017 0.6935478 1.081163 0.796679904 3.323583  
0.4486971 0.8206451 0.6545536 2.068310362 1.141087 0.9098787  
1.574268 1.137333265 1.028483 0.378481 0.6476586 0.540034 1.224156 0.6572757  
2.7194 3.084207425 3.726645843 2.931312974 0.4068867 0.739483131  
0.560026112 1.975475 0.3068793 1.073605268 1.056493 0.3972281 0.4196592  
1.489132074 0.5615027 1.044382 0.4442639 0.425252413 1.526796 0.6492036  
0.578696 1.179734 0.6957455 1.567635 0.5801516 0.237158 2.437312 1.500316  
0.9911844 0.467265205 0.7607829 1.87601 1.133707 2.197942 0.3469489  
0.9667621 0.4403483 1.238435913 0.358878765 0.637472609 0.4809004  
1.303708 0.5356746 3.661646 1.579383 1.066088943 0.4664281 5.565987  
0.3379571 0.3425962 0.7795187 0.254974921 1.697588 3.251109 1.111671  
0.9672117 1.868802 1.918312 3.249626 0.812678903 0.4598641 1.038186  
0.642877372 0.4255678 0.59486 0.9853845 2.731674 1.448089 1.909501213  
1.646927445 0.916213142 0.3431508 1.825077 0.7001544 0.4334717  
1.148059 0.8235576 1.181557945 1.014108 0.578275579 0.3041403 3.006623  
1.633905 1.151055 0.1613649 1.202938314 1.11519 0.7903612 0.6292262  
0.9928643 1.300865 2.110148 1.459149 1.471585397 1.0345 0.323812895  
0.3492599 0.2900918 0.887395709 3.780687 1.673497 0.5809359 0.993771338  
0.288537 2.779416 2.914196 0.614362325 0.6367324 0.4997197 0.7473264  
0.4970632 1.045975 1.09822 1.357586  
AL161669.3 0.4069111 1.721322115 0.6516195 2.125766781 1.678852266  
2.081308027 0.641938 1.400170098 0.328724 0.04864945 0.67327569 2.698127  
0.3282847 1.765651 2.795769 4.2781 0.6125379 0.428544301 0.2026219  
0.1814192 0.857236203 0.6544819 2.661666285 5.820618 3.19584 1.414798909



1.181762 0.4909503 6.270801 1.867038 0.1971606 0.928120074 0.7769489  
1.026494132 0.7218018 3.560942579 6.351359036 1.418742213 0.8209381  
7.622143 0.774694313 5.74761 0.358651923 4.4336 2.276225072 2.090716  
4.018835 7.190747 0.720377331 0.7890958 0.778492 13.01149 1.119023036  
2.272001 1.422427979 3.538687 0.556425 6.718571 0.110872 8.255891 2.15352  
12.47245 4.426094659 0.686829 0.6236717 9.098639 0.3473228 3.372992  
2.033068 0.1007288 1.309181 1.992062191 0.1231337 0.3694498 0.697782799  
0.9256532 1.981717039 3.496372 0.2842007 2.480387 0.7220727 1.715036  
1.153842 0.385403468 6.893627745 1.158441 0.1424316 6.519847 1.601432523  
0.4100164 0.5816723 0.81785 3.47362182 1.191379 1.208784 1.727127487  
0.1589614 7.674111357 0.421416195 0.6241495 0.246224482 0.2597157  
0.9599039 1.101682415 1.830048 0.8100718 0.612132347 2.384485 2.115721877  
0.588578456 0.3677399 2.133632782 1.544062 12.61141 4.6851 1.781331  
0.9771329 2.513180409 10.77442 3.832463 0.4636732 0.382342 0.4485253  
1.456085 10.30037 0.7761627 1.686501 3.265934 6.871684 8.985652965 1.165456947  
0.8141554 9.648713405 1.177643806 0.9105955 2.66240884 2.280322  
0.2972263 0.487958098 3.565956665 0 0.443336681 0.5269191 0.5229247  
3.504398 1.79206 6.40269 2.145659 2.128734181 0.4448121 4.148916 0.839097744  
1.425501 1.056486 0.401453064 2.692831 0.3414462 0.997216343 4.275361  
10.19005 0.783636234 1.288483 3.463384 0.9998325 0.899590094 2.697635  
4.337548 0.197808829 0.5396798 1.172223777 4.605891 0.9003212 0.97477133  
1.749365 7.115793541 10.13383 3.887586 0.5956192 0.572705 0.8948084  
2.501222366 0.4860694 0.2985078 8.878562 4.490358 1.98626 0.2828688  
4.500908 3.181764 2.526176503 0.127316118 3.681267 0.8003101 1.614956  
3.767978 1.92814362 2.580317 4.217893453 2.044501 3.036822 0.449507659  
0.760278214 1.280316 0.5801756 0.406212972 0.7505046 1.262005 1.90256  
1.425135 0.6051261 4.388314 0.5289619 0.155744 0.7934134 3.19916  
3.011172 0.6070875 0.2936778 2.098641935 12.45481 0.41888 0.273347779  
1.608597 0.3528657 1.352064 1.871455 1.613048 2.996978944 5.051151 0.8537053  
4.538544 0.1955116 0.8248458 0.722862686 1.052215 4.633599 0.3976309  
2.60313186 0.448992527 4.855046 0.3705614 2.157644 1.413565067 1.304902  
6.416239 1.809334166 4.9897 6.951 0.6066938 1.183751 0.3957831  
0.5880751 1.89499864 0.8465264 0.235108734 0.8160612 8.245162  
3.758094 1.471164 1.93613 0.7935283 1.901581 0.036346253 4.899059 6.120209  
0.466643074 0.5331507 0.2083908 0.602424 1.596497 0.4362677 0.1074314  
1.516863 11.19383 3.011416469 0.9720578 0.457598431 11.39186 3.819089  
0.9241129 3.409313541 2.38577421 1.003916 1.749401 1.808144 0.359282  
0.2998049 0.365439547 0.4342625 1.365128 0.244171 2.963968474 0.3577195  
0.1361058 2.097929689 0.3359764 0.396931082 0.3366307 4.041447  
3.523351907 4.68961 0.8424654 2.08437078 4.156072754 0.07841159  
0.6249988 5.569793 1.498169 1.59555 0.9250038 5.531581 5.042927 0.6440265  
1.677032577 0.4237565 0.200801258 0.02443344 0.490603685 1.398492  
0.744614 1.276781347 2.370011 0.1740416 0.3202314 0.680406978 0.1670776  
0.1070776 0.173060802 7.795643031 0.3860897 0.8277624 1.117448

3.057482407 3.651848847 2.140445594 0.8802615 1.190851 0.4651315  
0.2472516 0.5964764 0.459056 0.5238286 0.6969929 1.280512 0.08394581  
0.1098393 0.900553197 0.4347347 2.445244 0.6339075 0.8916065  
3.996493 1.001119 0.1686571 0.5028731 5.779834 0.8838284 9.327512964  
7.643527 0.9798592 1.835124 0.2205614 1.737677603 1.31962 10.67306 2.65209  
0.2711681 2.357685 0.4859516 0.6712415 1.420945058 0.2918205  
0.5441993 0.625603948 1.493677 2.667138 3.111644 0.2513155 1.721954  
0.887453848 0.90324913 3.367733 7.325957 3.340664 0.028422311 2.654889942  
2.30408985 0.6692957 1.906452 0.7990756 0.9256967 1.195934 0.5228024  
0.8876142 2.590143884 2.992783329 1.103865 2.460498306 1.161291 0.967487359  
2.277224 3.258693 1.0414 8.827679 2.48553 0.4178999 0.584546 0.3497101  
0.9490326 1.368097167 7.72135 3.834649 0.9071699 0.7114058 6.476947331  
0.7904349 1.405974 1.536945 2.251871073 3.229697 0.795503 0.4474653  
0.2330523 1.613068 0.2925592 3.60059 8.391444681 12.721484471 9.885545354  
0.3248461 0.414033427 0.659667443 1.750373 0.4200054 0.7885633  
1.841473 0.3286671 0.3164297 1.551798749 2.041832 0.5717507 0.6384364  
0.696886244 0.9108622 0.5883457 0.5140282 2.046117 0.6614664  
2.429484 0.5700622 0.5256298 7.302671 4.777733 0.8153114 0.325966393  
0.7492988 0 0.3893711 1.642928 0.727108 0.587781 0.7261748 0.870082251  
0.625130111 1.244072813 0.2490398 2.187205 0.8854502 3.508017 1.168668  
2.278033015 0.395656 8.864288 0.5592523 0.1823456 1.661757 0.396950338  
5.054411 12.78622 3.394393 1.453126 0.1967466 1.555359 15.40111 1.880248928  
0.7867321 0.303914 0.327608858 0.7228947 0.8698502 2.627744 2.724748  
2.890276 3.749111471 2.298983329 0.877772282 0.06663921 2.82226 0.4482926  
0.1887659 1.15778 0.7318817 0.788677526 1.414007 0.583171904 0.7770125  
3.214372 1.367003 2.822154 0.1644624 1.152467543 1.259186 0.5567652  
1.728693 1.950174 1.303738 4.370254 2.554591 2.8444205 0.3046404 1.227981568  
0.09615121 0.3184507 1.711135008 12.22627 2.212245 0.9785706 5.046341485  
1.581985 8.390979 3.888599 0.730200665 0.7009518 0.4110508 0.7334342  
0.5131555 0.9972249 3.008896 1.689126  
U62317.21.553115 7.095978636 5.711609 7.531719638 8.73328183 2.590788176  
8.650046 4.330078273 1.232282 3.006365 4.375683493 8.850647 2.784468 7.983251  
5.781051 14.11447 4.783129 4.09848743 1.49151 5.749797 2.765564306 8.140979  
33.057583958 8.748853 8.10144 8.371527861 2.59012 1.249253 2.621018 12.49982  
0.6768797 5.00568925 6.937899 17.46102074 3.785787 9.822805647  
15.355869266 17.083398559 24.42821 12.21809 12.294600955 7.869722 2.147321979  
1.967715 4.607268323 3.429239 13.61791 12.9051 2.274077581 2.522242 5.724089  
23.64896 13.728645775 4.129461 3.352158996 11.32972 2.60323 8.184972 2.115905  
5.159865 3.22339 5.124597 10.88389923 3.024828 0.963518 5.481424 1.968975  
4.365703 11.78765 1.510402 2.379494 13.440724952 2.928062 2.05924 10.334530503  
3.244658 2.86977275 10.7487 2.358899 5.823106 2.329508 1.999683 7.538923  
1.916039903 14.913396635 3.110424 6.374813 6.186453 8.209592908 2.253412  
4.997743 3.732009 8.278971144 5.057131 3.836063 5.736386295 3.804105  
12.794850064 2.431867174 3.119653 2.502064854 2.454633 4.866704 11.552054474

12.65399 3.617752 1.789798408 5.379499 8.796392086 3.175871255 1.65337  
21.234715879 5.200094 14.63052 11.98235 3.824177 11.50688 7.863909848 6.669567  
9.638542 1.798939 2.484351 3.472813 6.943165 11.82771 1.100354 6.383386 6.343669  
11.25955 19.82258871 7.163094256 4.186647 15.667404029 6.77150823 3.580306  
4.151391099 5.029627 1.329777 1.245862605 35.673617155 2.630727174  
19.082426927 1.228353 6.025781 4.743525 10.94615 12.9706 9.079291 10.109499577  
5.501081 10.17827 15.605009885 14.19713 2.922672 5.785149941 11.54138 3.577538  
15.794507277 4.130074 4.52558 3.759471651 10.79064 3.6354 3.894084  
11.854072272 5.057498 15.27206 2.786328219 1.866419 3.692984756 17.27131 2.45456  
4.944250174 6.462775 7.096955099 6.429693 26.0832 2.165128 5.84648 4.576483  
12.450529111 2.631152 2.521267 8.644916 17.81826 1.444046 2.586699 6.035955  
6.515772 6.77425071 1.226433936 27.9442 5.215776 21.42261 4.41292 6.342829303  
5.889565 5.911122476 5.327488 4.279208 3.243241966 6.469518949 4.886764  
1.328663 12.963853135 8.593673 3.258582 5.560284 8.441154 5.875478 8.653157  
10.67498 1.755044 2.771024 8.475917 26.97024 4.00905 1.753823 6.167165056  
7.567374 11.03933 6.661925704 7.718558 2.616703 3.458613 5.432875 4.623199  
21.768682634 8.90944 2.586078 12.13371 0.609173 3.498118 3.364212934 6.203194  
12.5473 3.974914 12.119423132 3.147673925 6.094254 1.683779 9.62756 5.117373864  
10.26306 12.93204 2.955994789 3.789394 6.383601 2.262421 3.425881 2.290572  
4.153949 19.751246164 4.089434 3.418563491 3.584465 26.37137 11.40168 2.506786  
16.25139 3.850868 9.687116 10.553230242 9.600558 26.96572 2.314727026 7.45803  
1.981204 8.029502 4.376147 9.272941 1.318013 4.24485 6.285675 8.306096506 2.73632  
2.685714766 6.114697 6.348806 3.107289 10.708459442 9.37896611 0.4865763  
8.242537 7.414395 4.843164 2.888016 3.602020736 1.804094 3.446083 2.736714  
11.312999671 2.036062 1.339965 6.129288504 1.507547 2.318913161 3.976967  
5.593886 4.209521557 6.637208 10.13306 7.03566557 5.297830548 3.277879  
2.722969 4.754904 6.31238 7.502862 37.06027 7.605873 9.594849 3.877435  
18.044635157 2.503137 2.317528345 2.109421 3.624928799 6.758015 2.607225  
9.572500152 20.10213 1.640953 4.292506 6.01687288 1.474973 2.257572 2.586263809  
5.180707573 2.603806 7.193364 2.43249 13.150409132 8.740795415 18.082940565  
1.938357 3.177558 0.3019275 3.661212 3.64265 3.136021 6.080339 3.371964  
8.630727 2.197083 2.329108 2.273326297 10.69862 5.526933 7.689963 3.467189  
7.263801 3.582293 2.310852 2.654098 2.985146 5.389884 9.07918257 19.11579  
4.308719 8.738794 3.344843 29.49944841 13.70553 44.64372 14.06426 3.168385  
7.554505 3.283343 2.806025 4.852213874 2.445718 1.916393 3.395395306 5.720521  
4.101849 5.547618 2.723093 5.335439 1.774284922 7.314662875 11.97752 7.775509  
8.012399 1.730569722 6.322139963 10.442616127 6.101379 4.971608 3.375744  
8.601753 6.97987 2.870445 3.428215 24.47155824 27.827762526 4.604255 7.16491908  
2.010188 5.98549568 3.992629 6.892934 2.606737 16.42532 10.3378 3.142972 10.6834  
4.581713 2.242381 10.295299627 15.90508 0.84346 3.609086 3.783255 6.101084105  
3.43335 2.453202 3.785538 9.935122637 5.505307 4.0854 3.768234 2.668572  
16.38371 4.13997 11.19968 10.583837862 13.666332765 17.292959845 2.066477  
3.428164495 1.818444675 7.108396 0.4089526 16.046150375 3.066095 2.279426  
4.296521 23.746472806 1.998295 2.805791 1.991996 6.479255182 4.430983 4.067326

2.736073 4.272317 2.91313 5.820688 2.752175 3.651922 22.12154 2.465299 12.13095  
1.816871861 1.439263 5.32031 2.421076 10.05178 4.704091 2.945967 3.331062  
2.99030756 2.574206285 2.117265099 1.980303 8.839902 2.085579 10.47002  
5.268341 11.579540018 1.713203 9.359658 4.279855 2.982791 8.332518 2.192172974  
4.118722 18.61573 3.311131 8.286994 1.948896 32.13606 8.913437 10.82989931 2.94921  
4.218152 2.758888071 1.944561 4.470388 5.689974 7.265422 5.23509 3.366038023  
5.695959399 9.942696028 1.029517 9.389493 4.149401 5.193138 7.650066 4.26646  
7.314841621 2.98454 6.86311482 1.081257 8.899261 1.656392 2.253373 4.513655  
5.784118801 8.287601 2.408429 1.873101 7.667753 14.41842 8.969792 4.014331  
6.036854005 12.80886 3.612170713 0.926223 1.894249 10.394157676 7.779817  
5.555694 3.390447 5.732466863 1.967329 4.628185 7.901529 5.348904269 2.238127  
1.779863 1.523484 3.152467 5.769055 6.421431 2.670952  
AP001094.2 0.02048617 0.87079599 0.317479 0.261912693 0.534339403 0.986208413  
0.3194726 0.413835774 0.06895748 0.1714499 0.191737495 0.1240536  
0.3060681 1.587631 0.339987 1.017608 0.3121929 0.6575332 0.3264356  
0.3957918 0.179825197 0.7070578 2.368097333 3.256026 0.959733 0.749222092  
0.7407895 0.3185769 0.04400099 1.253295 0.102938 0.61625116 1.337878  
0.31802729 0.4222307 1.010089652 0.690661097 1.148790502 0.5228144  
0.6964191 0.805416005 1.04172 0.276158791 0.04037429 0.701477773  
0.513455 0.6169252 0.2125078 0.286324808 0.3013809 1.371777 0.4910577  
0.694017057 0.8252446 0.34794993 1.29735 0.2490092 1.738376 0.1063222  
0.7107728 0.3295123 0.7426099 0.50246943 0.5674469 0.3419014  
0.5918962 0.2331489 0.7032751 0.9894409 0.1436854 0.6481295  
1.375701305 0.3512901 0.03306695 0.538031229 0.8388458 0.059483873  
0.68399 0.317961 0.1040637 0.5331797 0.1629141 0.9681806 0.243493122  
1.638058452 0.4418363 0.2748806 0.3668625 0.8613786 0.6094455  
0.1715665 0.05840444 0.909237038 0.7693723 0.5473903 0.53828185  
0.3023357 1.014061755 0.254597274 0.4015182 0.300516666 0.3050959  
0.1526113 0.213326276 1.114965 0.427256 0.133991971 1.60624 1.322588924  
0.617339985 0.3183122 0.424113708 0.5944569 0.6138716 0.1010889  
0.3379327 0.5124408 0.948956296 0.2096404 1.066945 0.7182737  
0.3593189 0.2769968 0.4944658 0.7689818 0.1458851 1.108762  
1.126283 1.555068 0.943913562 1.008808511 0.4065587 1.235090888 0.323395371  
0.2370189 1.241638287 0.4942955 0.05371702 0.124782373 2.295631161  
0.069400547 0.561382798 0.10765 1.207529 0.9595367 0.6212025 1.007335  
0.6601493 0.893102839 1.265766 1.474848 0.794605628 2.343433 0.5214646  
0.449141873 0.9587756 0.4179603 0.24704258 0.7796294 0.4444276  
0.299717538 1.370574 3.216986 0.383521 0.844047957 0.6131235 1.219554  
0.165979978 0.0905683 1.014205649 0.608994 0.1866414 0.532601463  
0.3829251 1.879620127 0.6740362 2.644902 0.4264788 0.36522 0.3282687  
0.302523656 0.2766337 0.247529 1.953708 1.0578 0.1846143 0.02966915  
1.020724 0.906999 0.771430602 0.06837123 0.8237133 0.2686138 1.215217  
0.11578 1.091073983 0.3222512 1.649035865 0.994305 0.8589358 0.214877547  
0.889255315 0.2343936 0.389457 0.481200579 0.6381396 0.1277451

0.3773367 0.9397745 0.3527575 0.3751678 0.5264957 0.2927315  
0.0104431 0.7681492 0.7284045 0.3328098 0.3449922 1.066447811  
0.6357411 0.6272553 0.075064639 0.2375582 0.2747688 0.9832395  
0.7851624 0.612792 0.961843565 0.5086061 0.3462301 0.3011182  
0.01874884 0.9330833 0.183802705 0.05433269 0.1260979 0.2414985  
0.887149414 0.193755306 1.563334 0.2902064 0.8400552 0.521111665  
0.5972367 0.7461043 0.28658146 0.6290061 1.437597 0.1474555  
0.2383865 0.3985185 0.6639141 0.408316802 0.4860045 0.147958547  
0.1826003 2.102492 1.251653 0.3893245 0.5907611 0.2503573 0.7640917  
0.091493646 1.730028 1.200189 0.045681636 0.6263081 0.1829297 0.6290538  
0.5358438 0.122023 0.3425506 0.3474915 1.351509 0.487639282 0.1273205  
0.41596488 0.693155 0.3564107 0.6668583 1.280176985 0.710782044  
2.156489 0.76783 1.81324 0 0.2817519 0.188700135 0.3695921 5.362493  
0.2321997 0.146604747 0.1453406 0.1142054 0.285148875 0.09162251  
0.656608025 0.07730606 1.432978 0.984094873 0.5612239 0.9813528  
0.69959227 0.542993824 0.4342444 0.3331686 1.586183 0.7405478  
1.998882 1.140624 1.03467 0.6656268 0.6845042 0.607904388 0.1185237  
0.215668358 0.2788262 0.143186802 0.6183972 0.1470118 0.636500888  
0.2938199 0.1825464 0.1791359 0.20201949 0.1602213 0.1796961  
0.141987106 0.680061395 0.06820318 0.3704371 0.5189743 1.229878889  
0.661760825 0.993361264 0.2727217 0.204099 0.3791375 0.07810526  
0.3363354 0.5312973 0.1358581 0.378427 1.253547 0.4169949 0.4301052  
0.145532163 0.356028 0.7084801 0.6184968 0.3340535 3.950614 0.08400317  
0.670582 0.2531743 1.289268 0.7806464 0.786374277 0.7171144 0.360704  
0.6405731 0.4164109 0.356417818 0.07381893 2.453614 1.222534 0.2145332  
1.466683 0.04254872 0.2453197 0.390208867 0.5387019 0.2111931  
0.069991975 0.2148572 1.015697 0.7812943 0.5515245 0.9247227  
0.400760427 1.643822376 0.1116381 1.899197 0.04836769 0.028618751  
0.981837808 0.396583666 0.933662 0.4312209 0.6451285 0.5359544  
1.043639 0.1169813 0.3351558 1.40192237 1.237236777 0.4654977  
0.754795098 7.776887 0.74936469 1.613567 0.7731599 0.2575502 1.503076  
0.8607198 0.3869317 0.8138474 0.1369383 0.4823463 0.491407688  
1.690692 0.5246576 0.3315448 0.5306094 1.588240465 0.6744898  
0.3869555 0.9304692 0.560763435 0.5511896 0.7699545 0.2703348  
0.2346631 1.286634 0.3647196 0.1080765 1.29728802 1.353839906  
0.896744935 0.2589472 0.285650276 0.405916317 1.413649 1.097548 1.541997063  
0.5143354 0.2554614 0.2498955 0.428433979 0.362426 0.2782561  
0.2214257 0.341855179 0.1079009 1.332927 0.1293952 0.1389857  
0.6233433 0.2117988 0.4603975 0.07967394 0.5219823 1.155124  
0.6170512 0.28445672 0.03429443 0.05894857 1.141795 0.4193956  
0.4938995 0.1554336 0.1798969 0.074335399 0.131135555 0.18979866  
0.1811052 0.5312617 0.357841 0.644483 0.9754599 0.949439046 0.7421001  
0.8777959 0.1136114 0.2570483 0.1574816 0.22546832 0.4820166  
1.670578 0.9302414 0.6573659 0.1452781 1.542107 1.276114 0.568862098

0.2112452 0.5563901 0.337203623 0.1649886 0.8154579 1.415505  
0.8926218 0.5285286 0.886903054 1.543248421 1.062711128 0.0223666  
1.077911 0.2396273 0.2649468 0.7124224 0.2216812 0.646202545  
0.2219872 0.283814525 0.08964802 0.2676249 0.1709318 0.8158136  
0.09383946 1.512079053 0.3585949 0.5381887 1.190182 0.4341409  
0.1409166 0.8381827 0.6668788 0.545538964 0.5930421 0.406733124  
0.006454384 0.1457508 0.804048666 2.331034 0.3672638 0.7287366  
1.366283333 0.2459243 1.188391 0.9532056 0.334203368 0.6358526  
0.2272347 0.02344455 0.1997915 1.142898 0.8470107 0.238112  
AC007566.1 0.1127568 3.705278504 0.6057714 2.445712358 2.374210428  
1.18255741 1.889247 1.621462977 1.229725 0.4044289 1.289011672 1.925486  
1.435289 4.204091 2.245563 3.113171 0.7543857 1.289300901 1.28016 1.231665  
0.760139834 1.541557 4.495596122 3.133668 3.138373 1.637883702 2.658295  
0.2902279 0.3632749 2.148043 0.3156632 1.52075148 2.227843 2.36308794  
1.622973 2.67208927 2.105406043 3.557910995 2.473174 2.698829 1.570763407  
4.756824 0.607995817 0.2857137 1.743167461 2.119558 4.558138 1.403582  
0.672402657 0.3016024 2.490624 3.481209 2.399795324 1.724879 1.042187554  
3.077527 1.279187 3.758071 0.5793499 0.9865354 0.5616464 1.844736  
3.895906682 0.7905731 0.7604168 2.29464 0.7149597 2.416925 5.363296  
0.4465979 2.176677 3.701238017 0.6141754 0.191102 2.194880273 1.392441  
0.08929138 3.543256 0.7560306 0.3818474 1.960875 1.578167 1.543545  
0.980018569 4.124793585 0.5252872 0.6709625 4.463554 1.319912178  
1.233559 0.547048 0.5593412 3.051117661 2.056037 2.445733 0.752076556  
3.876301 3.482817519 0.864143665 0.6341662 0.595460269 0.5181718  
1.175971 0.75146032 3.461604 1.59056 1.415995039 3.363822 5.686870261  
1.304780202 0.5577808 2.801207512 0.8809003 2.145129 6.268744 0.9156901  
1.105634 2.943926364 6.957832 4.33029 0.4151079 0.5297428 1.034078 3.6836  
2.390122 0.894724 1.888617 2.247592 5.366303 3.421321296 3.943425392 1.210568  
3.147416736 3.085301539 0.885729 4.038289916 1.395416 0.4308199 0.283308054  
3.887769222 0.511270244 1.786915322 0.4570794 2.132996 4.55898 1.986348  
3.252722 2.67557 2.53077998 1.972148 3.058267 2.026223546 6.094472 1.618772  
1.017090787 3.20662 1.558384 0.736887398 3.24632 3.286347 1.23219343  
3.559453 9.225197 0.5541154 2.311506721 2.848839 3.39819 0.745465568  
0.7809703 2.598624465 2.21743 0.7337728 1.080452673 1.053818 6.463569573  
2.088972 7.259415 0.8582524 1.184952 0.4151806 2.447701203 1.100959  
0.272482 4.795048 4.049761 0.5419332 0.09798014 5.123716 4.299699 3.259081386  
0.084671576 2.400222 1.850189 2.569579 1.647066 2.914344947 2.161678 2.70578351  
3.35299 3.630811 0.558634664 2.885626051 0.7482651 0.8488606 1.53615791  
1.386453 1.709678 1.365946 3.029199 1.90629 4.038104 1.132185 1.035775 0.5518008  
3.327786 4.239696 0.4710341 0.581281 3.347944814 4.535685 1.60717 1.349652445  
0.7369716 0.6727301 2.220222 2.736992 0.5501319 2.327755484 2.239512  
1.222254 1.901098 0 4.368192 0.461315949 0.5681939 2.984408 1.07037  
2.130723271 0.78205403 5.196428 0.7432372 2.391569 3.236380047 3.260918  
1.437306 0.901346485 2.622522 3.906559 0.347829 0.9083694 1.039009 1.659209

4.56393607 1.481532 0.618921228 1.839223 9.228091 3.044044 0.8153314  
1.287623 1.460069 1.128088 0.543871644 3.731652 3.849201 0.280168907 2.258285  
0.3198238 1.780631 1.640102 2.01486 1.637332 1.334378 5.210692 2.693746964  
0.6569786 0.803081982 2.990589 3.159369 0.9986945 3.613610941 1.515348453  
2.818984 1.670579 5.010441 0.06637235 0.9969263 0.592009661 0.7563973  
11.15233 0.5863935 2.040351479 0.5217135 0.3017237 1.018554869  
0.4655023 1.351321008 0.2160209 6.4782 2.758318163 1.022566 1.739436  
4.62070212 2.040533877 0.3476508 0.4686311 2.455429 2.022907 3.948356  
4.190314 4.311067 0.6280522 1.219493 2.255405467 0.3653212 0.7122286  
0.2437419 0.969370564 3.124828 0.2912974 1.103027873 2.768957 0.5063904  
0.5324247 0.667154236 1.640268 0.4272717 0.149196022 2.626504677  
0.02252359 1.242455 2.578012 2.328295943 2.033386653 3.631983447 0.6379554  
1.039117 1.067945 0.5319946 0.8727105 1.473839 0.5278367 0.4771684  
5.283102 0.8188129 1.359516 1.256977565 1.753997 0.8339534 2.875896  
0.9882714 19.17548 6.935355 1.294216 1.286291 3.521566 1.263233 3.821914872  
3.735778 0.9809864 2.949418 1.100133 2.782101992 0.8358222 8.075867  
4.279194 0.4293817 3.108922 0.3044469 0.8597509 2.577271117 0.8086467  
0.5843495 0.731953644 0.8869372 4.775561 2.527509 1.285672 1.217896  
0.858474354 1.312653348 2.165975 6.150758 0.8567372 0.378045124 3.869137037  
1.17871907 0.9736891 2.365801 1.268718 0.3847716 3.446541 1.521142  
0.787077 4.940117508 3.600430492 0.3764746 2.316702215 13.97525 1.649813843  
6.017078 4.421573 1.012548 6.67791 3.833681 0.9743324 3.479573 0.1292081  
0.7513739 3.591524697 5.420366 4.006736 0.8044177 1.372633 6.261272693  
1.440419 0.6233618 2.356348 1.24800558 1.233733 1.148324 0.6282388  
0.5424701 2.881756 1.158134 1.00585 7.243674391 5.663209534 3.915672506  
0.6526174 1.325773228 0.609321925 4.304692 3.026016 2.223143987 2.626336  
0.7669475 0.4538936 3.717504536 1.066316 0.2218083 0.6368881  
0.683312524 0.5345019 1.211102 0.4476665 0.7559835 1.691955 5.210899  
0.7108496 0.6202049 4.896613 1.795159 2.888311 0.963484117 0.4152676  
0.7462474 1.022176 1.769751 0.8443166 0.7502193 0.1916439 0.543578555  
0.69290456 0.752155032 0.6900996 2.807123 0.3405023 1.964637 4.550843  
2.968967202 0.7481176 4.591992 0.8808886 0.5254988 1.126821 0.778437341  
1.261055 4.217409 1.48425 2.661105 0.5888085 6.440176 2.412517 3.346299844  
0.8720269 2.296796 1.113589711 0.6730655 2.659742 2.822739 3.11058  
2.253588 2.653561341 4.694110042 0.486468661 0.147728 3.200153 1.380264  
0.7037777 3.234992 0.4748662 2.416859493 0.9606089 0.711037127  
0.7266826 2.76191 0.3862297 3.381265 0.3098978 2.293538944 0.9727626  
1.234255 3.512872 1.544004 0.1714508 2.043074 2.084336 2.173671462 3.061527  
0.931289273 0.4902477 0.1925324 2.575451539 6.842725 2.953053 1.11856  
3.356069045 0.5906521 6.370711 4.867122 1.177260365 1.721881 0.8576292  
0.2709835 0.682548 3.828253 4.324885 0.8237921  
AL390728.6 0.9642422 15.105505524 2.687133 6.443513247 7.815834605 2.454001887  
4.196349 4.522082145 2.152403 2.427006 3.625991903 6.499674 3.593918 6.742244  
2.248771 9.267718 4.48468 1.705234869 2.350186 3.832354 2.900034892 3.673188

11.513237605 6.717846 5.314431 6.411105619 4.324112 3.653442 1.662279 12.3207  
2.390665 3.799760762 8.015345 13.376806633 5.8386 6.003447515 10.35205495  
10.074763435 6.655133 11.59237 5.585059822 2.939031 2.789093541 3.171988  
7.148834758 3.815886 18.70853 15.4829 3.381002182 2.39251 4.976007 10.54686  
7.342256179 6.016588 3.021880655 8.758937 3.289924 10.54552 2.182827 4.478479  
2.034137 10.31744 11.730394132 4.019463 1.737171 3.649765 1.990555 6.140178  
6.440484 2.905149 2.918628 18.615741469 1.727676 1.98133 5.174569069 5.656885  
4.109252391 5.108182 2.7411 3.179447 3.129455 3.228645 5.991954 3.251602952  
10.918280754 2.741832 4.851776 15.70096 6.59362505 4.395336 2.440172 2.701955  
3.555730964 5.990531 4.821878 3.346482774 4.67552 22.721901065 2.128625285  
1.751476 2.20545708 1.619576 3.638808 7.239967367 8.583883 3.276305 4.663659023  
7.050035 5.739192742 4.519116962 1.315578 15.540001436 3.440844 14.99943  
23.20591 2.801223 5.979106 8.423743044 16.02794 9.226151 4.848731 3.194919  
1.074042 5.576237 9.196675 2.187732 2.949081 8.739569 30.19084 16.468045263  
3.203542031 4.482652 16.84007658 6.40907681 1.610821 5.48761666 7.346993  
1.796459 3.88330056 17.115311164 4.433635832 6.760771176 1.614349 4.839228  
1.322698 5.770802 12.85147 7.094312 8.60713815 3.714518 7.34115 10.894970366  
10.35882 5.803428 3.016053074 8.986188 3.945362 6.011309755 7.242545 21.45083  
3.307059574 6.168347 8.253932 2.282423 5.686300713 6.040144 7.845555 3.059146873  
4.010458 6.692651409 13.95489 1.816411 6.827856718 3.948569 9.002909031  
13.91041 18.55339 0.8295169 1.952345 3.802176 12.379645531 3.215609 2.518475  
6.836045 7.861339 3.220419 1.565512 9.785682 11.25248 4.855060902 1.238542645  
25.74697 2.837568 14.55392 4.583559 6.846619737 11.31965 4.75951701 9.340899  
6.787706 3.796939308 5.617438671 3.962964 3.589005 3.814589499 3.962496 5.95857  
4.23339 8.552507 4.587829 4.995463 7.302379 4.137366 0.6693934 6.96709  
12.89052 3.583863 2.459257 5.100275084 3.331797 9.262969 4.044514053 4.413702  
2.975014 7.728792 27.21452 2.796593 11.731797343 4.209378 3.826386 5.72625  
2.856415 7.010674 4.931193515 6.999004 17.94218 4.357026 7.829307176 3.31987813  
7.370277 3.015049 7.682789 4.580872538 6.08079 10.27064 6.313367883 4.484729  
6.227189 3.104928 10.65253 3.4813 4.183953 6.696371598 5.167766 1.887639157  
4.105063 12.9042 9.590448 2.566988 8.912527 2.899767 8.952087 5.983655065  
12.91511 10.69916 2.315847334 3.122847 2.409103 6.066357 5.981505 2.901915  
4.672812 4.789602 8.350075 3.475772971 2.424683 3.543174365 7.16623 6.889117  
2.305091 4.98288891 9.528338233 8.597581 7.049014 6.669047 0.4107522  
3.863778 2.927464515 1.769899 18.82292 1.789101 11.576303837 2.089835 2.192603  
6.152063386 3.129606 3.005653897 1.24848 7.599457 4.962785256 4.782146  
6.767842 1.85686321 4.887718319 1.711399 2.957488 6.236149 9.240595 7.254083  
3.699225 7.779271 15.67662 4.635272 7.334473711 1.379986 2.767334643 2.255015  
3.790974005 8.139537 3.100139 8.41859241 3.701477 2.984619 4.726112 2.562111582  
3.244738 3.031499 2.446185272 8.951696415 0.684276 3.710108 3.038527  
13.521079352 6.372097704 14.023347988 3.715815 3.539244 21.27753 1.587199  
3.407154 3.41544 5.10773 3.362081 10.42514 1.19354 1.837957 3.119894036  
5.617164 7.989135 6.848835 3.504105 16.21634 4.799254 1.132641 7.15225 3.671439  
4.394707 9.93783202 11.10925 2.917203 7.015017 4.031674 16.1788686 10.85456



33.91659 6.311774 0.9300455 4.588168 2.042207 2.81846 3.356420273 2.436483  
1.601356 3.684502652 2.445057 8.923789 6.961765 2.62806 6.943924 2.64631667  
9.362667759 3.539063 4.312738 4.558582 1.595162312 7.925310502 8.418291979  
4.408468 3.708711 4.04027 14.11401 13.45717 3.491101 3.556316 4.860157625  
17.5704021 3.265323 7.242818771 16.06981 4.73374757 5.866741 10.79118  
3.155915 14.06362 9.127573 3.037344 3.294183 2.053564 3.584693 6.929885441  
14.99528 18.4143 2.903963 4.271987 6.842316147 2.798736 5.874284 7.344995  
3.204876134 3.93702 1.269022 2.976399 4.708705 6.567947 3.127519 4.381096  
19.155465345 22.870433071 18.253085616 2.10169 4.89125445 1.288945712  
8.783365 17.58562 7.622040207 5.821975 1.467049 4.236666 9.099452014 3.758616  
1.675743 3.078841 3.660459747 2.539337 1.821345 2.152235 7.549369 8.805021  
5.391094 3.599318 3.045185 28.74306 4.570055 2.35271 2.479908366 3.738075 5.6587  
4.217228 5.973975 1.59777 2.488013 0.97037 1.608007984 3.410997867 3.653304321  
2.031843 10.74993 3.94402 16.71774 9.311075 5.479345863 3.45421 3.536015  
2.487119 3.43404 3.901229 1.390012355 5.059336 14.02937 2.903219 5.791563  
2.993644 10.72481 8.538855 4.822173465 1.96241 6.771012 3.772655266 2.578541  
2.712173 8.527046 4.802361 4.760725 4.281508646 7.801996235 2.09175389  
3.241361 6.958878 2.567748 1.883417 5.730768 3.050076 5.409973368 2.375087  
3.963930822 2.407565 9.478493 3.493402 4.537039 2.676764 6.059724961 7.019417  
4.65243 6.951751 2.903797 2.411457 11.60558 1.969164 6.59929774 7.446917  
3.244420255 1.870735 6.210277 5.256655316 11.81984 8.128938 4.405114 1.688823384  
3.094554 7.909358 5.966921 3.504814022 3.733159 1.462586 0.7078287 1.075205  
4.368222 3.95846 2.738661  
AC138207.4 0.1903491 1.587096568 0.7079723 1.359451339 1.205107753  
1.063614224 1.128686 1.339300248 0.3075479 1.21754 0.983031885 1.910527  
0.5972106 2.212743 2.388219 2.827859 1.135545 0.868698774 0.8625397  
0.8592703 0.461157983 2.554526 0.948649272 2.688254 1.429414 1.985488415  
0.5446873 0.4133913 3.536459 0.7628278 0.6148657 0.840016327  
2.307113 1.231241514 1.070839 2.594481518 1.989992674 2.521961624 1.910288  
2.485992 1.484934095 1.989621 0.384893198 0.6511382 1.239035853 0.9541629  
2.200588 0.7616067 0.603026976 0.9291932 2.292623 1.067674 1.968696117  
1.048261 0.507507161 2.190174 0.5977038 2.325539 0.4371469 1.478769  
0.6518445 1.758591 1.309277266 0.8155875 0.5251458 2.283554 0.3172117  
2.414594 2.805597 0.6596796 1.010497 4.686155057 0.6816091 0.7834738  
1.120401399 1.410381 1.778688599 1.794453 0.6115534 0.2900753 0.6080017  
0.6963162 1.95429 0.551469409 1.683731288 0.4064308 0.6246388  
3.148596 1.555895564 1.105144 0.6349018 0.781445 2.074592646 1.728385  
1.687397 0.779079031 1.598754 1.554670836 0.896961917 0.4501223 0.890038635  
0.8140001 0.8389844 0.495535148 3.014887 0.4655596 1.020898892  
1.536654 2.894915113 1.651988419 0.4708059 2.858616217 0.8497616  
1.014754 1.048859 0.6159098 1.990261 2.044013739 0.9934253 2.383437 1.22633  
0.5365679 0.8560487 1.97932 2.251596 1.089245 1.886923 1.737632 2.021244  
2.390484902 2.216626437 1.068249 2.141576766 1.562525981 0.8258561  
2.661328995 1.766743 0.449205 0.804352361 1.750159326 1.056548042 2.394396604

0.3643732 0.8806292 1.311459 1.552932 1.549557 1.014174 1.895235304  
1.393224 4.235393 3.154194183 1.782765 1.264607 0.482903806 1.76185 0.8268132  
1.321716905 0.976365 0.6059504 0.92070647 1.873131 0.9670593 0.5846401  
2.764020228 1.361293 2.135297 1.165916914 0.554003 1.279495309 1.371104  
0.5821941 0.593845822 1.120765 2.463478732 1.589805 6.11107 0.3250625  
0.7412064 0.4477863 1.296539709 0.5832757 0.616055 3.09379 2.048359  
0.5717868 0.6202656 1.752672 1.376259 1.859758172 0.667041414 2.025955  
1.112436 0.8773094 0.732358 2.728264557 1.29126 2.587422622 1.112545  
1.468482 0.853845591 2.080018995 0.7078141 0.2822567 1.22955777  
0.7723736 0.6746904 1.749658 3.607832 2.458259 1.22975 2.013677 0.6119867  
0.6768052 1.957009 3.451699 0.6721091 0.5298931 1.807474511 2.599658  
1.627876 1.918042365 0.8327517 0.6074473 3.595781 0.7903359 0.6633568  
1.708956397 2.148073 0.8236701 1.246697 0.02613099 1.028947 0.573827399  
0.6184255 1.171651 1.257768 1.639238895 0.720118056 1.824013 0.5695624  
2.069117 2.330643324 1.964445 1.890681 1.160219056 1.369797 1.808995 0.6752616  
0.937111 0.6723635 1.037862 2.320123649 1.479778 0.398683407 0.8843774  
3.531417 1.514585 0.4698265 1.119779 0.6607449 1.014829 0.816116711  
3.301833 1.544077 0.600300776 0.7214867 0.6448892 1.857847 1.930819  
1.201815 1.419714 0.7884155 2.325272 1.433426224 0.5988987 0.936513344  
1.355624 2.239703 1.177994 2.292588888 1.166201694 7.670498 2.920892 2.578757  
0.02801145 1.823197 1.104594469 0.8198306 10.73784 0.8376196 1.926527853  
0.7926527 0.6366898 1.127383684 0.4813226 1.007980314 0.4061137  
1.706343 1.763448584 1.330638 1.1282 2.78585378 1.330909212 0.4951826  
0.6621286 1.194186 1.732959 2.056893 3.179463 1.893546 1.864255 0.8033853  
1.119219839 0.5946877 0.911149309 0.3886109 0.498912472 0.8722683  
0.5122402 0.94859921 0.6791843 0.7327352 0.9986748 1.358844547  
0.681085 1.282301 0.917503567 1.831396267 0.7794708 0.6695669 0.6139057  
2.4238014 2.3739758 3.968035906 0.8393936 0.7822667 1.072379  
1.313103 0.6473403 0.5627722 0.5903286 0.4027635 2.861943 0.5576205  
1.34449 0.561693626 1.529303 0.6257021 1.986101 0.5819791 10.96103  
2.078143 0.7889617 0.9680999 0.8984516 1.980191 2.274717546 1.604783  
0.8723793 0.9958059 0.9285888 1.738636586 0.1763731 2.222803  
1.758857 0.3986709 2.025157 0.6622034 0.7047565 0.976914309 0.9100724  
0.5568746 0.967376042 0.8235007 1.391623 3.388986 0.8862441 2.055978  
0.64913186 1.173698197 1.614292 1.84138 1.427907 0.372279234 1.149937278  
0.442187206 1.330633 0.6785588 1.677049 0.9743223 2.26265 0.743876  
0.6747284 3.820501214 2.646333095 0.4898968 2.537145473 13.94318  
0.661465099 1.301989 2.838511 0.6666357 2.336033 1.427238 0.7482534  
2.977513 0.4089776 0.7991072 2.133276136 2.85518 1.016875 0.9713253  
0.6286012 2.863834934 1.228348 1.40748 2.486153 1.02791829 0.9389286  
0.4846328 0.7954161 0.5887062 2.574442 0.7429348 1.054413 1.3203746  
1.751429408 3.180118242 0.4083922 0.774723595 0.390875796 0.9083651  
1.852474 3.071347026 1.771039 1.076231 0.7139924 2.962208443 0.6888098  
0.575038 0.9756046 0.614378502 0.5514141 0.7470325 0.88454 0.6836816

0.6783607 1.977787 1.133346 1.475308 2.467198 5.79579 1.43584 0.599770313  
0.7408609 1.136532 0.9490667 1.591215 0.5587919 0.7915468 0.5418987  
0.310812371 0.804182279 0.560803049 0.7281153 2.288633 0.4311115  
1.122801 3.251378 3.700471728 0.6205762 2.122035 0.7779542 0.6994564  
1.225476 0.399946814 1.87582 1.572929 0.7210946 1.487588 0.4693847  
4.549479 1.443476 1.275985126 0.7544529 1.176118 0.664093333 0.5884041  
2.188883 2.09425 2.930843 1.016364 2.292616351 2.320691781 0.703908898  
0.155866 3.930329 0.6834895 0.947249 1.015497 1.027102 1.486594433 1.301581  
0.409203404 0.4543488 1.177279 1.404328 1.510954 0.4077499 2.14420084  
1.19592 0.5834067 1.264837 1.061216 0.46516 2.308601 1.759325 1.578529409  
2.479637 0.831423561 0.5847221 0.1760534 1.828402437 3.688801 1.758161  
0.529292 1.219659115 0.5842402 1.792442 1.696417 1.11790121 0.9216608  
0.576857 0.1797157 0.4704965 1.444988 1.979627 1.683034  
HCG27 0.3290639 2.387952127 0.4579214 1.261221686 1.299385321 0.825543563  
1.132508 0.75187744 0.9087214 0.1846674 0.235701094 1.280983 0.6621942  
1.892301 0.9562531 4.285416 0.7188776 0.74767691 0.5417337 0.8233806  
0.983263399 0.3307945 3.876791194 1.848058 1.193671 1.0585148 1.428351  
0.3024954 0.158664 1.879999 0.2530814 1.052247691 0.908734 2.597631922  
1.218477 5.731293988 2.279300672 3.026346196 1.50077 6.625177 2.457294979  
2.807783 0.584949116 0.4537758 0.717177039 3.71137 2.252004 0.3134807  
0.569419577 0.1796289 2.668899 3.084263 1.854845478 2.229256 0.755990678  
3.899447 0.5305815 6.941289 0.2718579 0.3950853 0.512213 3.444721  
2.137713137 0.5667652 0.4323046 1.754706 0.5295418 3.323167 3.086912  
0.07480846 0.9938988 1.035969018 0.3725657 0.08942757 1.917272363  
1.239605 0.23931152 3.290748 1.407119 0.7050065 0.7984363 0.6622219  
2.403333 0.149661899 7.722347008 0.1564258 0.7933497 2.012798 2.182149362  
0.4446779 0.33163 0.9304765 1.572014197 1.563029 1.671963 0.78047233  
2.037563 1.77512501 0.500758445 0.7296438 0.162545813 0.2657508  
0.9255112 0.391611702 2.836436 1.077182 0.588581838 3.14825 7.428698116  
1.06244631 0.3130385 1.832448615 1.401561 4.036375 1.767361 0.4516333  
0.9272696 1.52711087 2.298764 1.426809 0.7828974 0.8707945 0.4086115  
3.104235 1.220155 0.4713952 0.6484968 3.672335 7.955818 4.211199835  
1.685549211 0.7865372 1.931928739 2.007170027 0.8219564 3.922216463  
0.9486912 0.135841 0.176402864 4.544139946 0.141751559 1.403485728  
0.362971 1.201332 3.153582 2.113945 3.551648 0.6713445 1.161630937 0.8553978  
2.003594 1.216673906 6.913825 0.9282136 0.466940734 3.753547 0.2254067  
0.658315292 2.189021 4.636685 0.493258373 1.923655 1.967336 0.3123415  
1.619637375 3.42849 1.416731 0.313401787 0.4997693 0.816838461 1.167096  
0.2709535 0.905386933 0.79082 4.502488904 3.548899 6.242597 0.596353  
0.7750494 0.7143474 1.190046325 0.5650281 0.2028567 3.431499  
3.958568 0.1613828 0.08753281 5.284074 1.596918 1.353267373 0.075643298  
5.265432 0.8604184 0.7394042 2.198408 2.340607437 1.614272 2.294880269  
2.210451 1.554258 0.350697216 0.996195239 0.4610206 0.329384 1.033215049  
1.263392 1.064538 0.3282676 1.660248 0.788439 2.3162 1.258309 0.3701335

0.1899965 2.347497 3.348874 0.6011559 0.2561884 4.35049228 3.521221  
0.7763968 0.623377349 0.5238806 0.5031619 2.289274 4.255427 1.456866  
6.108689459 2.023455 0.7866583 3.179037 0 1.008378 0.506121129 1.309097  
3.730598 0.4562452 3.106456192 0.444605599 3.340287 0.5649723 1.032672  
0.871977705 2.04395 2.106732 0.6509012 3.139319 5.251179 0.1795393  
0.7814567 0.4813004 0.7764391 4.324406097 1.441211 0.300714958  
0.5342358 4.72734 2.223283 0.635011 2.370372 0.2985945 0.945921 0.899778208  
4.261079 5.753986 0.1989527 0.5342265 0.3015954 2.157847 0.9853839  
1.432017 1.037222 1.072887 4.152698 2.371643646 1.048643 0.371312745 5.035571  
2.262915 0.2440223 1.941201433 0.619372521 0.8836507 1.07492 2.656602  
0.07906036 0.3232646 0.241245988 0.5989557 11.31498 0.3693942  
1.565337981 0.1864339 0.09733816 0.82982807 0.3742804 0.552145636  
0.2163797 5.301741 2.65939163 2.068136 1.417653 2.45714907 2.163611572  
0.2329364 0.5885543 4.046 1.843175 1.824916 3.677139 4.250795 0.8665643  
0.6465914 1.616363038 0.4273868 0.364538733 0.1371034 0.38019928  
0.9525271 0.4771015 1.685741897 0.8598084 0.1651603 0.2994858  
0.872431514 0.370282 0.4736069 0.437945284 2.924558771 0.2146343  
0.5692185 0.8063086 0.770383959 2.376824091 4.125673691 0.4358304  
0.7025114 0.1973944 0.2112309 0.905661 0.3239469 0.9902655  
0.6292843 0.5400744 0.1828763 0.4773624 1.067903237 0.568243  
0.5449767 1.055922 0.698103 6.035555 1.59027 0.6937304 0.5043438  
1.344931 0.9980269 4.253402925 5.522674 1.105917 1.411353 0.6051677  
2.95546062 1.130422 3.345976 6.715036 0.1726191 3.361089 0.9066154 1.80203  
1.648678201 0.246159 0.6848294 0.453146502 0.9860552 1.811509 1.717027  
0.5487682 2.473791 1.011931812 0.602907922 1.310601 3.257252 1.21078  
0.290827619 2.491011327 3.763627846 1.187438 1.470588 0.7271113 0.7104054  
1.807076 0.1869452 0.6592062 3.66625294 2.590087547 0.5792389  
2.27926693 4.526766 0.429887241 0.8579533 2.234689 1.163897 5.455416  
2.048867 0.5755383 3.530177 0.7983982 0.2506027 2.661925677 6.274499  
1.402781 0.3460143 0.3652729 1.96217107 0.9463296 0.2970104  
0.9150536 2.469639788 2.373009 0.4824086 0.3347816 0.1769277  
2.649651 0.8323148 2.618499 7.075627007 6.575117584 3.664734882 0.3417766  
0.789606655 0.42096535 1.561749 1.069462 2.546277914 0.8118528 0.3996826  
0.4116401 2.94935116 0.9655782 0.04718036 0.2037084 0.380427199  
0.3006542 1.900376 0.4847674 0.4824109 0.6634009 1.145594 0.9878616  
0.251852 3.846288 1.142669 1.266424 0.581006708 0.08431564 0.7053252  
0.493796 1.435927 0.2857158 0.3527503 0.2225723 0.255863455 0.696399989  
0.321045159 0.1918051 2.184833 0.8410111 3.40061 1.85769 3.098592387  
0.3533794 3.262027 0.8549711 0.6379929 0.3355571 0.191496564  
0.3324372 6.155401 1.166665 1.883814 0.4740725 5.387617 6.39308 1.328663943  
0.7855373 1.076105 0.627188649 0.4008657 0.7128424 1.317097 2.983556  
1.204029 2.079883592 5.623405952 0.682939649 0.1319762 1.74534 0.4713145  
0.4418144 2.324782 0.5538593 1.439437982 0.9560449 0.375358076  
0.2324291 1.01164 0.2123367 0.9422958 0.04342813 0.414984451

1.183909 1.24967 1.199725 1.346529 0.7877289 1.452331 1.16527 2.146002892  
0.9452134 0.527992813 0.1523388 0.06689015 1.391204869 6.861324  
2.591068 0.5854432 2.631772127 0.4067477 3.770266 7.953591 0.350577534  
1.138079 0.3032807 0.1383368 0.0948531 1.549463 1.460915 0.3456752  
AC009065.8 3.390401 0.787150612 0.518164 0.82251726 1.969374815 0.672587522  
0.7421109 1.030316848 0.1620676 0.5996292 1.126579442 1.895124  
0.6653875 3.181093 4.774358 2.310939 0.4697678 1.629882324 0.7592149  
0.6261036 0.633952281 0.746181 3.790960399 1.475837 1.105694 0.744026228  
0.9767664 0.2259119 1.055679 2.563383 2.030487 0.676425627 1.015919  
4.567718519 0.833736 1.755616995 1.112067857 2.028459282 0.85099 2.025075  
0.689355169 1.152367 0.540869375 3.948094 0.673335107 0.5782342 3.962735  
2.229676 0.523394644 0.4292858 1.639925 4.539501 1.511181214 1.166176  
1.141075323 1.55676 1.219239 2.174078 0.2342664 2.178908 0.2498186  
1.525226 6.25764904 0.6511935 0.2254874 0.504024 0.4077076 1.427788  
2.706328 0.6207668 0.7099982 2.713214457 0.5463667 0.6071542  
1.506254493 1.004005 0.746670841 1.733632 0.242869 5.978529 0.4627954  
0.3509819 1.510441 0.335314827 2.857312857 0.5451744 1.123547 2.514808  
1.376631667 0.5390571 1.303528 0.4804284 2.154171179 1.130138 1.343264  
0.669042723 0.705341 2.264137375 1.059610377 0.4102912 0.154501033  
0.2560903 0.5977921 3.258910799 1.627975 1.118269 0.341158069 1.644195  
1.434254035 0.761725466 0.6488748 2.430659996 0.8060334 2.705164  
2.672826 0.7891363 0.682474 1.098247952 1.077799 2.563251 0.3692774  
0.5843574 0.5660981 2.060736 1.575694 3.7348 1.491519 1.273982 3.38788  
3.956662559 2.434463795 0.5874075 1.857091624 0.907850881 0.6596699  
1.21590213 1.05398 0.7665096 0.091646952 4.063779587 0.548924183  
0.675592319 2.688177 0.5775 1.509499 1.158717 2.192122 2.005514 1.354205386  
1.144181 1.813744 1.241076676 1.520344 0.7966232 0.490098791 1.7582  
0.6931643 0.4682361 0.8962469 1.5611 0.521121333 1.583234 1.853121  
0.633777 1.955503166 1.382351 1.589879 0.604647367 0.6504009 0.821945065  
2.958918 0.8355325 0.98351677 0.8812217 2.558348741 1.553692 4.938418  
0.4698438 0.7152998 0.4924562 1.355357805 0.4584457 0.5886817  
3.215984 1.897575 2.83234 0.5578402 0.9355949 1.246344 1.408794841  
0.878772041 3.202834 0.6087638 2.568406 0.6802808 1.225584933 1.804676  
1.310165655 1.337117 0.9420679 0.4700954 2.044541435 0.5508845  
0.4576614 0.471226455 1.258048 0.4345484 1.364365 1.157257 2.433822  
1.449155 1.510777 0.3378538 0.6749581 1.795639 2.139919 0.3990753  
0.2895783 1.933968385 2.977734 1.143783 0.539064022 3.658701 3.145377  
1.234435 1.153332 0.5243507 4.378788449 3.690201 1.174996 0.962686 0.7711295  
0.933825 1.03675922 1.010924 4.815885 0.8775129 2.05343498 0.063246409  
1.690506 0.5567826 0.8084594 1.233884561 1.544024 2.042469 1.002290429  
0.7853596 1.399754 0.4331972 2.35241 0.6778169 0.6325811 1.914682542  
0.9006075 0.521610209 0.6839691 2.349272 0.9406608 0.2929152  
2.221502 0.4851197 1.161994 1.738185756 2.403888 2.474936 0.939430084  
1.370596 0.4109637 0.8360204 1.318242 1.027647 0.6091072 0.854679

3.647528 1.693066934 0.2337777 0.65801551 2.331964 1.506311 1.207357  
1.59681776 1.770960754 2.903712 1.273832 1.782903 3.247444 0.6503637  
0.582084839 0.5046648 2.692143 0.4614614 1.138273172 0.6126293  
0.2013087 0.820619055 0.2277594 0.391390166 0.628923 1.737065 0.704551565  
1.307648 1.123895 7.0466545 2.035276387 1.81695 0.5437713 1.393814  
1.907002 2.79897 2.339713 1.505632 1.471273 0.5556568 0.859883556 0.533908  
0.574194765 5.155767 1.156805809 1.707296 0.6694356 1.314500533 1.05267  
1.029673 0.8946567 0.490279589 0.2588854 0.3589817 0.549856043  
1.896308166 2.524643 0.9692462 1.076225 1.265756487 2.485108336 3.830286948  
0.1001508 0.1998685 0.2293193 0.4015532 0.35289 0.7648187  
1.573027 0.2627771 1.262637 0.3310959 0.5234792 0.460435123 1.337438  
0.7212721 1.1629 0.5315853 2.591148 0.7403579 0.7803435 0.5530671  
1.38054 0.6192171 2.288429359 1.63199 0.997348 1.067609 0.6660402  
2.355953438 5.421663 5.814671 2.118536 0.4774691 1.92395 0.479168 0.6030384  
0.679325833 0.3996484 0.4862961 0.531194384 0.5260093 0.5563263  
1.14765 0.4003041 1.067262 0.763693556 1.563568566 1.004416 2.237188  
3.074428 1.036945473 1.042283886 1.485490181 0.9280585 1.491612 1.256415  
0.9584133 2.175041 0.4081076 0.4157312 2.7150493 2.375199868  
0.4186369 0.913067674 2.017522 0.697140564 0.9072468 2.354503 0.3783177  
2.446141 1.919171 2.415561 1.472987 0.373564 1.523992 2.626998761 2.211559  
0.2649192 0.4373142 0.5455917 1.195652314 0.5812481 8.096267  
0.9064617 1.199751885 1.097522 0.6567055 0.9706818 0.505558 2.058359  
0.673109 1.472087 3.560458612 5.099146462 1.551411729 0.4804671 0.793826781  
0.303547481 2.858587 0.0887448 1.825564937 1.168186 0.4093631 0.9910987  
1.653534695 0.9098699 1.071162 0.3147621 0.370008227 2.060455 1.843993  
0.5249545 2.209703 0.9532632 2.302236 1.001249 0.6186069 4.622691  
1.816545 0.9930902 0.664259941 4.231532 1.154534 0.6062143 0.6388706  
0.5462537 0.6673905 1.125202 0.218383819 0.269676608 0.736023789  
0.532054 1.56075 0.4989085 1.310797 1.516256 1.012039072 0.7114188  
2.601625 0.4933986 0.2517203 0.6554238 0.526896937 1.52642 3.228277  
0.8751355 1.245949 4.694804 4.653826 1.684328 2.27180502 0.8533248  
0.6810718 0.323035638 0.3849139 1.330926 1.247549 1.496193 0.8058422  
1.469802569 1.551030631 0.927341909 1.664627 1.823255 0.6712379 0.930654  
1.545941 1.355322 1.212247283 1.326804 3.04766525 0 1.277629 4.28163  
1.045545 0.5027164 0.852284849 1.580229 0.944268 0.3059469 0.5297926  
0.7190303 1.700248 1.15451 1.271702677 2.343025 0.398302531 0.2465034  
1.084746 1.633967071 2.425387 1.266598 0.7538362 1.791323147 0.5582806  
1.578248 2.132569 0.392731369 0.9340093 0.6914159 0.7404148 0.3643143  
0.9833043 1.646148 1.315782  
AC092279.1 0.8730389 0.796222064 0.2981749 0.658440077 0.225832171  
0.521011519 0.5259549 0.563246147 0.6557413 0.3105482 0.101294455  
0.5046368 0.6855871 2.806113 1.947019 1.141163 0.4264064 0.803300523  
0.3161678 0.329728 0.45600584 0.4279355 0.644258491 0.5045775  
0.3678414 0.747025878 0.9984234 0.1973212 0.9685673 0.9554534

1.204171 1.159150936 0.7726859 0.868067414 0.4826947 1.201361286  
0.442059596 0.591180361 0.9629731 1.561768 0.489156707 1.250151 0.523722128  
4.905817 0.359581416 0.5244303 0.5303107 0.2084966 0.457155549  
0.308788 0.5333337 0.7955688 0.552128049 0.2538587 0.564288047  
0.8494935 0.1973265 0.324568 0.477443 0.5550863 0.2470821 1.534558  
0.588614026 0.6557706 0.3907413 0.2809744 0.3049973 1.443865  
0.994969 0.2679129 0.6151688 1.529794973 0.225614 0.3144455 0.374528787  
0.5768117 0.285683513 0.4534591 0.3561135 1.1484 0.268874 0.2754147  
1.051195 0.289432862 1.47114994 0.1867368 0.2146712 0.9384609  
0.516952966 0.491608 0.2500363 0.3208912 0.821239663 1.700704 1.959654  
0.20416523 1.108667 0.364293933 0.179337499 0.5718047 0.261957676  
0.09210366 0.1791648 0.090159804 0.8394606 0.1641588 0.736191396  
0.2779298 0.956637503 0.776211345 0.3500548 1.58677315 0.6764157  
0.1357564 0.5103145 0.6958053 0.7363617 1.205220739 0.1550535  
0.5109855 0.1391362 0.583041 0.3117609 0.3584251 0.2799378  
2.994748 0.647415 2.030043 0.9415385 0.74191957 1.049587363 0.5140732  
0.267163523 1.085840263 0.4942757 0.566506162 0.3622197 0.8756817  
0.164805565 0.995098576 0.767126646 1.886659614 1.05618 0.4302351  
0.4971095 0.2500417 1.017041 0.3646078 0.413987571 0.7612905  
0.6813106 0.882086663 0.9078887 1.179091 0.738959474 0.3548858  
0.4558605 0.244183737 1.026706 1.286241 0.620434483 0.5202064 0.2951558  
0.2532666 1.094832237 0.4745683 0.8134127 0.182388588 0.4253068  
0.849893448 0.2887321 0.563441 0.530587322 0.5327191 0.801687078  
0.9532301 1.043314 0.1126539 0.3181898 0.1992526 0.215760396  
0.7269773 0.1805857 1.919699 1.345156 0.7260661 0.1504717 0.560816  
0.8965029 0.859148752 0.41538409 0.3839698 0.4135605 0.5080544  
0.4140486 0.768548995 0.2128057 1.386219872 1.020984 0.1573082  
0.729421809 1.446140581 0.1816167 0.2304391 0.398273459 0.1685638  
0.4475483 1.096403 0.8680978 0.5364936 0.8955716 0.3945798  
0.2761595 0.2206825 0.7156243 0.9716562 0.1865873 0.5728125  
0.612090843 0.8364827 0.4227919 0.458252507 0.2738213 1.066173  
1.163197 0.4055816 0.9617803 0.853364262 0.6758096 0.5613522  
0.7111813 0.6933478 0.368355 0.100986626 0.3540139 0.1887488  
0.5237621 0.475780085 0.56866922 1.19985 1.846042 0.3825855 1.273785522  
0.4964161 0.6390252 0.511877178 0.4818385 0.4253081 0.5193358  
1.601686 0.5244942 0.2654281 1.949711652 0.6320123 0.187598742  
0.5209234 1.604404 0.9739273 1.379555 0.4619045 0.461514 0.3799226  
0.55425133 1.029245 0.5121229 0.413717102 0.5942282 0.210337 0.577617  
0.4971248 0.5071205 1.400126 0.7428543 3.040474 0.337246236 0.2017893  
0.574739243 0.637883 0.6870967 0.4260367 0.816111237 0.2756868  
12.65062 0.3817814 1.759463 1.380309 0.8080366 0.31900744 0.3025071  
13.17879 0.2381252 0.697058401 0.3605466 0.4263632 0.866968488  
1.213822 0.542949544 0.0628317 0.7643887 0.314558284 0.6066184  
0.7557014 6.86386817 1.948685441 0.278073 0.2998725 1.219555 1.178519

0.3289733 0.8200913 0.597699 2.484986 0.9992184 0.412346413 0.4090897  
0.270600545 0.7278512 0.521952163 0.6219066 0.6523944 0.885600593  
0.2650172 0.1928776 0.1703467 0.194891701 0.7448716 0.3265696  
0.238672778 0.925589289 1.751134 0.4158647 1.746412 0.554556902 0.674892823  
0.927754374 0.396215 0.3863729 0.2238618 0.2217876 0.2030688  
0.6904804 0.1688788 0.2326366 0.5045682 0.6668462 0.6946548  
1.111865112 0.5796834 0.1630563 1.479526 0.3897259 9.804516 1.708579  
0.7131346 0.3841065 0.6811173 0.3051861 0.783848356 0.4588885  
0.190559 0.6312708 0.3568708 0.924355658 0.2451326 1.322163 1.053618  
0.1511165 1.073971 0.2697406 0.3914503 0.465738164 0.2127275  
0.5970653 0.48685845 0.3783618 0.472927 0.9602892 0.2742297  
0.4652655 0.469218991 0.099655602 0.9141615 1.260235 1.133603 0.413258593  
0.566649832 0.178087063 1.075511 0.6613924 0.8501348 0.2544187  
1.460848 0.4248813 0.4957736 1.572291815 0.504782944 0.2107897  
0.722452816 14.27683 0.026392504 1.443852 0.7969922 0.6025654 0.9254642  
0.5876332 0.9403094 0.9443624 0.6510976 0.9423621 0.578801492  
1.238729 0.4677334 0.4789934 0.3083516 1.541779357 0.6271431  
0.4387716 1.38555 0.3091304 0.4723784 0.433008 0.1586858 0.7851556  
0.7604852 0.8250677 0.5709655 0.342677061 0.447477448 0.652719715  
0.2664023 0.416017613 0.584848931 0.4073602 0.2127823 0.930141028  
0.8539838 0.7974889 0.3894565 0.869858126 0.3968626 0.7603553  
0.2641454 0.104558627 0.4275284 0.2682598 0.7096333 1.29575  
0.5413328 0.7944387 0.9350021 0.6734648 1.127027 2.527151 0.9807947  
0.339088363 0.9843931 0.3425663 0.7776292 1.124241 0.32539 0.2147629  
0.1962097 0.302949347 0.588868071 0.256691643 0.4342284 0.6735943  
0.3332346 0.1440487 0.8179891 0.559290976 0.8006067 0.5991652  
0.4018774 0.8794536 0.7210419 0.29778592 1.527889 0.6511349  
0.4362258 0.3360821 2.644388 0.8495615 0.7230205 0.779495719  
0.990453 0.597677 0.666103122 0.9741756 0.5212202 0.701789 0.6249025  
0.6432672 0.776909874 0.695145758 0.133408567 2.394754 0.9318402  
0.4474969 0.9858808 0.7270804 0.5444201 0.485345717 0.2749904  
0.744522341 0.430553 0.5743789 1.730013 0.6247943 0.4665897 0.529455573  
0.9607558 0.3001195 0.4244198 0.5222251 0.211583 0.4217237  
1.390368 0.520025521 0.7130337 0.624573272 0.3205245 0.1231996  
0.466296518 1.753148 1.450966 0.4771704 0.560740437 0.3070865 0.8600332  
1.379024 0.63561179 0.954011 0.3858671 0.6316706 0.2256572 1.440471  
0.8880632 0.2695585  
AC005840.2 0.1139825 0.881560662 0.2174047 0.892903534 0.59875757  
0.437162281 0.4578905 0.216143674 0.1947867 0.3354465 0.175846724  
0.5654486 0.2593686 1.108478 0.4016108 0.9458676 0.2639722  
0.668367485 0.1047835 0.6547771 0.471016348 0.6874918 3.222638658  
0.4140828 1.655107 0.528411306 0.539236 0.04231485 0.018832 1.283281  
0.2076948 0.982539615 0.5750254 0.839361173 0.1333111 0.706179592  
1.398397927 1.222809428 0.81642 1.806613 0.626992763 0.8091283 0.227294823



0.1925464 0.597478954 0.2527169 1.302289 1.208353 0.204240442 0.1407143  
0.6709798 2.681744 0.524175227 1.11324 0.509095955 0.6803808 0.2575528  
1.24599 0.1774691 0.410014 0.5049716 4.151477 1.079935473 0.2732196  
0.3314834 1.398799 0.2637187 0.6607207 1.874955 0.1085223 0.5077706  
1.846649926 0.1503488 0.2335136 1.54417824 0.5299788 0.347161718  
1.833937 0.04082528 0.5047672 0.5134405 0.1394513 0.8230285  
0.254018494 3.049668723 0.680766 0.3606114 0.925554 0.522025052 0.37022  
0.4709572 0.2924595 1.694662452 0.6823976 1.2651 0.558227145  
0.3539383 2.343646884 0.317815125 0.3025983 0.501611151 0.1119241  
0.5007573 1.077358824 1.371576 0.189511 0.309675288 0.4527145 1.823533997  
0.649970323 0.1334543 1.892533622 0.6947673 2.630366 2.942024 0.4227702  
0.8772789 0.664599554 0.6594719 1.197085 0.2689874 0.1565312  
0.4097775 0.4355571 1.676007 0.1739328 0.8316931 1.531181 1.52554  
2.660395151 1.3613668 0.5562398 2.434922129 0.645913847 0.2242398  
0.640106597 0.3173306 0.08867714 0.080108484 3.199449349 0.157653148  
0.521059751 0.1579652 0.8112729 0.8027985 2.278874 1.379615 0.8187168  
0.843392805 0.5584044 2.043393 0.916934182 1.379079 0.6494591 0.494301609  
0.5645535 0.5799271 0.470677265 1.262158 2.53063 0.612584421 0.9311445  
1.052877 0.176967 0.590326233 0.5858478 1.242911 0.323932528 0.180891  
0.112259552 0.4711634 0.2282306 0.371230098 0.4015262 3.033328354  
0.5192659 1.811188 0.1112285 0.5841083 0.4932301 1.796496375  
0.8834205 0.1513429 2.723241 1.670687 0.09218199 0.07618866 0.5347169  
0.4320144 1.516973779 0.043893344 1.27537 0.8375958 0.4939089  
1.017736 0.659250601 1.512815 1.271720339 0.5933767 0.838165 0.234805594  
0.694995412 0.4213365 0.4900505 0.689929892 0.4312384 0.4316343  
1.500054 0.7731188 0.6313576 0.7047161 0.3773053 0.2013529  
0.3754418 1.601382 1.928954 0.2703442 0.0452 0.929763614 0.6776608  
1.041437 0.35339638 0.2957749 0.2311417 0.7445225 0.5152643  
0.3590285 2.234275703 1.424805 0.2605979 0.8642253 0 1.60618  
0.084959054 0.3836889 2.509545 0.7915127 1.67409399 0.19349262  
1.601898 0.1825061 0.5486017 0.63913299 1.165589 1.161184 0.280352251  
0.565338 1.202428 0.08114082 0.01569648 0.4039629 0.483821 1.411488069  
0.355209 0.278629278 0.814726 1.453598 1.868705 0.4023435 2.503117 0.8275669  
0.3693446 3.367622471 1.24073 1.466921 0.167582579 0.6236355 0.1174382  
0.4999967 0.2237424 0.7102557 0.1620408 0.8923382 2.474253  
0.808257253 0.1430413 0.19720132 2.684328 0.5138202 0.2887276  
1.441690064 0.635370892 0.288424 1.786167 1.244846 0 0.4048281 0.436113956  
0.153726 1.220177 0.1227626 0.80672686 0.1217042 0.2346182 0.851796207  
0.07239425 0.183275167 0.5344702 0.7502515 0.668937936 0.6046375  
0.5196729 2.05315724 1.105885064 0.1351654 0.1029838 0.6728096  
0.9156257 0.5596743 0.8579188 1.378149 1.831383 0.4163133 1.551427209  
0.1217448 0.501902912 0.2316502 0.257386814 0.2774232 0.2170728  
0.46121961 1.923087 0.3093872 0.3565083 0.800717005 0.2777213  
0.3230145 0.240314233 0.606785558 0.2014131 0.8472169 0.3471729

0.915291345 0.391592488 1.309610978 0.4231182 0.2620572 0.2863539  
0.3259259 0.3701528 0.3683721 0.2360042 0.2826993 1.302943  
0.1157642 0.2051187 0.287475538 0.6594658 0.7745689 0.7941321  
0.562951 5.52074 0.91679 0.2963209 0.2833931 0.8354271 1.343119  
0.723922866 6.250754 0.1634589 0.8145689 0.3148551 1.310486478  
0.9748941 6.573771 1.21525 0.3171899 1.672963 0.1547888 0.2057034  
0.241230374 0.2235726 0.2858235 0.284580979 0.7356545 0.9504644  
0.8598509 0.3665674 0.367503 0.375493254 0.96880942 0.9317111  
0.7539366 0.6831299 0.195976803 1.239464009 0.611042387 0.5768638  
0.509024 0.3722815 0.2194101 1.225473 0.2065258 0.2581982 0.724033565  
1.745861124 0.5976857 0.604284262 2.359295 0.65747781 1.367965 1.016928  
0.2125845 3.804274 1.790893 0.1987237 0.634438 0.2637373 0.08179682  
0.817136239 2.614467 0.3157712 0.3040671 0.4655462 1.10884488  
0.3175427 0.1211804 0.7242455 0.673047291 0.4953981 0.4305191  
0.3085352 0.04017342 0.7278619 1.056653 0.529838 0.942424438 2.513836784  
1.176981181 0.2099879 0.198252279 0.142141321 0.8014656 0.3749299  
0.945614212 0.5272035 0.1192746 0.2165795 0.927614334 0.177677  
0.06159876 0.08253994 1.617118598 0.173177 0.6067009 0.229431 0.8607765  
0.3618043 0.5030955 0.2686987 0.2557476 1.796941 0.5670854 1.28142  
0.290314384 0.1247603 4.768361 0.09714671 0.6082964 0.7087589  
0.09978615 0.3427481 0.122714369 0.26098012 0.194956804 0.1878158  
2.220006 0.319284 0.3978353 0.9144964 0.981714727 0.1103283 1.466181  
0.3044323 0.29861 1.398563 0.302653675 0.1205641 1.601581 0.6575928  
1.706229 0.3645869 2.241969 1.62662 1.814593778 0.2712328 0.6191369  
0.348250215 0.1183815 1.357254 1.153393 0.9421932 0.6442552 0.895433596  
0.64659032 1.121313925 0.03829075 1.153339 0.6511251 0.2292544  
0.8107832 0.2230901 0.629776412 0.3931382 0.087960954 0.0313924  
1.084559 0.3349828 0.8365789 0.517386 0.575667213 0.6413069 0.556654  
1.53771 0.6346063 0.8094363 1.716799 0.7262862 1.195343897 1.312843  
0.43171311 0.1740321 0.07485592 1.273004126 2.753958 0.9943684  
0.1844996 1.964490641 0.4377578 0.7838322 1.89232 0.457714651  
0.449029 0.1250412 0.3461744 0.274218 1.058659 1.689866 0.4658726  
AC024060.1 2.24007 5.257895205 0.7604214 2.200827167 3.323543885 1.292948795  
2.089009 2.728212272 0.3877812 1.262571 1.508241621 2.354445 1.864599  
3.531434 3.218383 3.013383 1.570059 1.412287698 0.8286168 1.426749 0.876411224  
3.023915 3.588400296 2.906381 2.910169 2.175849982 1.940767 0.6692427  
1.821424 3.94027 2.205219 1.999313754 1.753366 4.595247555 1.167741 3.370462579  
4.917142429 3.319361367 4.701411 4.295941 3.061102032 2.953155 0.597297666  
2.594789 2.473604029 3.047816 4.851095 5.050441 1.073428229 0.7275699  
2.671571 10.49353 2.027921477 1.909169 1.516814025 2.483252 1.42623 3.925995  
0.6726387 3.379121 0.5479321 3.911201 3.327278977 1.246495 0.5885744  
2.33157 0.6503514 2.116758 3.19776 2.178464 0.8236711 5.725532432  
0.4196267 1.278416 1.601792902 1.539133 0.861607596 2.011192 1.341036  
7.802674 1.249303 0.9161443 1.846139 2.032523718 5.469382667 1.573617

1.232149 5.187773 2.13133662 1.351228 1.524829 1.040048 2.989501202 1.375767  
2.082338 1.843376453 4.250449 6.748026734 0.695976523 0.5726635 0.809767706  
1.062101 1.152222 2.46591932 3.128735 0.4732525 1.213974492 1.416271  
3.618944411 2.66156012 0.913277 5.701834 1.250023 5.55279 15.94878 1.09636  
2.433437 3.50372221 5.550696 3.995291 1.963499 1.563578 0.8747877 1.266367  
3.84589 4.394903 1.25796 2.25798 7.041769 10.195398946 2.411996719 1.62413  
8.248933795 3.40147048 0.6722817 2.644822078 1.382359 0.7192302  
1.790825974 3.999719662 1.75122371 2.408899309 2.486333 1.118593 1.479531  
2.680061 6.60885 1.968664 2.727188721 1.764293 2.378836 3.063810841 3.935173  
1.539534 0.992255447 3.405559 1.737521 3.024956863 2.223886 3.486246 1.175233005  
1.901907 4.476215 0.7301408 1.993782351 1.770718 2.500363 1.275626691  
0.8252695 1.679871024 3.951539 0.8746452 1.426226012 2.18328 5.131464877  
4.227788 8.373262 0.7494674 1.951718 1.603806 4.926496685 1.662013 0.7733194  
7.873049 2.807561 2.018674 0.4171098 3.252681 1.953818 3.191714277 1.521917293  
14.1916 1.222822 6.678064 1.878134 1.954981634 2.265217 4.811629934 1.673499  
3.595823 1.028391463 2.500355531 1.757478 1.095052 1.804015125 2.085461  
1.449348 4.182682 2.584385 1.552916 1.041852 2.696797 1.763754 0.4893881  
3.831968 6.52827 0.7002398 1.18779 2.560511503 2.585749 2.3313 1.446167705  
1.518073 2.708465 3.465614 2.943564 0.6691309 4.12893875 4.333542 1.314797  
2.075163 2.767637 1.489583 1.791592687 3.012953 3.44706 1.310411 4.220381236  
1.210643817 2.410232 0.9714109 2.002285 2.150463376 2.836109 3.125588  
2.877831465 1.473835 2.540779 0.5593898 1.632736 0.7863375 1.681761  
2.907000087 2.31257 1.756533524 1.176598 6.82115 4.183176 0.7787354  
5.426153 0.8986467 2.611814 4.630615654 6.427424 5.678448 0.917463736  
1.467513 0.6807586 2.73733 1.429075 3.850312 2.999325 1.136112 3.636452  
3.407013796 1.081435 1.589436654 2.671978 1.435807 1.998581 4.256422709  
3.162238823 14.73765 3.005582 2.358425 1.789501 1.320356 1.193795743 0.8538005  
17.8136 1.024134 3.876779818 1.214135 0.4281545 1.799880053 0.8587292  
0.936484161 0.6688142 2.933856 3.216563628 2.478876 1.53295 2.34175259  
4.124001328 0.8633211 1.214349 1.526466 2.870562 3.501768 5.693145 2.424353  
5.25822 2.87009 2.672931923 0.5924584 0.821171461 3.458767 1.241362906  
2.828124 0.5855922 1.565227812 2.048572 1.505601 2.098683 2.099228224  
0.9385431 0.8420982 1.209790763 2.322675893 0.8310019 1.817328 0.89924  
3.120366931 1.86069997 6.068286828 1.171535 0.876751 3.657968 0.7777916  
0.863128 0.9212201 1.535481 1.61218 2.853287 0.7922173 1.065375 1.573841283  
1.285512 3.484466 1.924552 0.6848858 11.79698 2.066708 0.9998879 1.30812  
2.484484 1.938895 2.676937339 5.443171 1.441764 2.944147 1.040746 7.288396748  
3.755842 13.75953 2.85134 0.7920962 5.498577 0.7643409 1.196549 2.268831394  
0.6629957 0.7489626 0.956663257 0.5873416 2.33956 3.922852 1.246677  
1.599256 0.913649579 2.336258141 1.700278 2.407752 7.706519 0.71527566  
2.706542659 3.531119948 2.105436 0.4889038 1.69844 4.986816 3.344095  
0.6509895 1.047079 4.257483469 7.864589528 0.8903803 2.4551962  
9.567721 0.877924725 2.424038 2.34183 1.178204 5.574202 3.102719 1.88125  
2.826358 0.7334001 2.004495 4.19043527 6.477181 3.303836 1.236616 1.657707

3.302772571 0.9903895 2.034506 3.117797 2.456486366 1.549802 0.6692606  
0.7507272 1.686186 2.149118 1.161353 3.223002 8.479157978 7.060191485  
6.023378849 0.9260826 1.338624269 0.449615442 2.064838 3.067145 2.885071473  
2.450805 0.7346161 1.61022 3.306869555 0.8646468 2.293195 1.405852  
1.475538883 2.823207 1.619439 0.7218766 5.632 1.16045 4.36717 1.485054  
0.9600964 4.502301 3.025015 2.715634 0.61524507 2.008897 6.261595 1.869529  
2.729703 1.11642 1.008552 0.7070649 0.39811787 0.768165005 0.960596376  
0.6528473 2.308554 1.051632 3.717167 2.418642 3.622434311 1.720524 3.822332  
0.9490785 0.9751432 1.537491 1.03258391 2.757549 5.32353 0.8571716  
1.457474 4.363355 4.358501 5.373485 2.165979862 1.082752 2.607374 1.236690281  
0.4775495 1.556878 2.959512 2.283989 1.191377 2.486636907 3.958581822  
1.035469225 2.026426 2.704255 0.5484173 0.7827495 2.162488 1.488082  
2.04316126 1.1479 1.559335562 1.031183 1.998806 3.58354 2.771102 3.078276  
3.213399334 2.940805 1.506241 2.056692 2.597883 1.146955 4.535813 1.283544  
3.056713106 2.204141 0.965730444 1.179624 2.185672 1.699831964 6.030833  
2.282308 1.635367 2.010772992 1.28342 3.013406 2.817611 1.392138184 1.251497  
0.8747189 0.9063999 0.3551368 0.918152 4.793682 1.83318  
LINC00115 0.3000854 0.706463191 0.6076643 0.74614224 1.332031006  
0.660396276 0.4179076 0.357552021 0.2181821 0.1722124 0.276848435  
1.308356 0.4626811 0.9002292 0.8964349 1.54731 0.4952291 0.300989733  
0.2032219 0.3879954 0.379312375 1.399719 0.89732713 1.61345 1.008893  
0.537917216 0.3691126 0.1158598 2.03673 0.3904085 0.3489608  
0.404725432 0.3786635 1.490727767 0.2068398 1.134100667 1.575907214  
1.3706294 0.8072247 1.37405 0.902956386 1.265958 0.149362211 0.5880307  
0.708085588 1.624576 1.249841 1.947758 0.413821842 0.0642136 1.242178  
2.543483 0.789367295 0.7528435 0.341369535 1.284766 0.3039612 1.828504  
0.1962359 1.231277 0.1868423 1.316899 1.420851706 0.1246811 0.183976  
0.7237739 0.2439435 1.12565 1.511324 0.1634262 0.1737871 1.048443476  
0.2784766 0.1453113 0.445055088 0.3978833 0.161592313 0.7308133  
0.3018095 0.5894136 0.4473067 0.09545585 0.3638441 0.147127761  
1.709614678 0.1863965 0.1155432 0.6222378 0.38761383 0.184305  
0.06239516 0.2566558 1.172902862 0.2847135 0.5433562 0.558005122  
0.2344591 1.033850204 0.099450382 0.2301463 0.198091139 0.1225811  
0.7749662 0.024998751 0.7862936 0.2594444 0.219826868 0.8952313  
1.43546187 0.575129305 0.2169582 1.686540525 0.9913401 2.09537  
1.382051 0.4417014 0.9728203 0.842454087 2.45054 0.7887439 0.2525138  
0.1804585 0.4445611 1.020762 1.931004 0.274751 0.5949467 0.9951742  
2.088495 1.477088287 0.723782159 0.3280324 1.606897854 0.821107205  
0.2521695 1.339280064 0.9389339 0.0674449 0.150796466 1.500274497  
0.112607161 0.891676851 0.3379025 0.3331948 1.512551 0.8839507 1.82314  
0.7252495 1.661035217 0.4678082 0.9766949 0.83097436 2.145441  
0.2841527 0.281962099 1.556505 0.3910412 0.476271131 0.4568064  
1.205776 0.322554089 0.7017005 1.568128 0.2844056 1.037350888 0.6516555  
0.9244752 0.315097298 0.4245317 0.261265568 1.001859 0.1718488

0.454724603 0.7628456 0.969971084 1.713417 3.130436 0.1171339 0.4955616  
0.2946511 0.584947979 0.3366429 0.1139554 2.418635 0.921464 0.3605687  
0.04172154 1.47843 0.3985768 1.026167818 0.165249941 2.555134 0.3237701  
1.429181 0.6262032 0.742704994 1.699343 1.704550248 0.5415632 0.7851077  
0.208944887 0.312623547 0.4394806 0.2053742 0.352435883 0.3689839  
0.5318246 2.079115 0.6033957 0.3851956 0.6228267 0.6564346  
0.2940333 0.1376752 1.393796 1.520448 0.1193893 0.222767 1.458009514  
1.001528 0.8554489 0.263894667 0.3416529 0.324765 1.536286 0.6900725  
0.6693003 1.613274917 1.869313 0.2938056 0.3269209 0.0164782  
0.3965217 0.4006257 0.3024327 1.717809 0.3686464 1.287699589  
0.264895363 2.067715 0.1561591 0.8656134 0.492179719 0.5459025  
1.053166 0.671663964 2.128388 2.209305 0.06171302 0.7306193 0.2703719  
0.9935413 0.621114462 0.4074308 0.138708798 0.3530688 2.684928  
1.756697 0.2336798 1.03843 0.308988 0.5688454 2.723319599 2.643764  
1.257689 0.206481588 1.022277 0.1134885 0.5002157 0.382885 1.444233  
0.1267641 0.5255847 1.955088 2.228626299 0.3357026 0.157484046 1.25772  
0.6045104 0.4089042 1.118850889 0.600977446 0.9871458 0.809807  
1.157829 0.1766402 0.2712131 0.16584693 0.2287544 2.654819 0.1320507  
1.233275265 0.1666156 0.06691608 0.368250464 0.1238865 0.217453132  
0.4076618 1.846352 0.784962642 0.6916908 0.5555101 2.10811076  
0.872183741 0.1156526 0.3036641 1.045562 0.5303313 0.8866093  
2.325289 1.036843 1.470891 0.2533073 1.451136162 0.1805604 0.165855436  
0.5189463 0.251691303 0.4714734 0.2196527 0.587108989 1.04554  
0.1540209 0.2046733 0.308788168 0.1971439 0.05053868 0.22689318  
0.830701869 0.2997159 0.3967933 0.4369573 1.996622299 1.021620991  
1.309585038 0.2197183 0.08969041 0.1764109 0.1544536 0.5348994  
0.2241373 0.238809 0.3386435 0.5456194 0.1188627 0.1296054  
0.491949882 0.297521 0.665833 0.4000834 0.366996 2.842327 0.5168077  
0.1760452 0.1597527 0.8471976 0.5351607 1.212750892 4.012396  
0.4662053 1.028547 0.3985115 1.30996526 0.5190306 3.335325 0.8318512  
0.2399745 1.954567 0.162048 0.5368233 0.9145366 0.200862 0.4615312  
0.164040924 0.2832542 1.755114 1.191167 0.410595 0.5031191 0.361744493  
0.852634258 0.9443839 1.096664 1.283027 0.167685163 1.595330601 1.359360527  
0.7403797 0.4034477 0.2038644 1.064973 0.642856 0.1156656 0.05236721  
2.120102587 1.162760921 0.2170851 1.357983891 2.31641 0.351258771  
0.9363861 1.292752 0.3125906 1.843754 0.9077751 0.3570745 0.9962878  
0.1719342 0.3519419 0.835467082 2.407865 0.3314279 0.2854451  
0.6839771 0.802637278 0.3319698 0.4811056 0.7796465 0.492850172  
1.227237 0.2182924 0.1231974 0.1924938 0.6717694 0.3041105  
0.6390068 1.41021683 1.793970325 2.014139208 0.2635212 0.339264293  
0.2205403 0.6615609 0.3539909 0.879899813 0.6381811 0.1530838  
0.2525756 0.959825554 0.2316604 0.2023919 0.1506652 0.300453584  
0.2212774 0.5454594 0.1624633 0.7041782 0.1651058 1.154118  
0.2942832 0.1700601 0.9840194 0.5494181 0.7733969 0.230775296

0.8439503 0.4490147 0.4957118 0.3003434 0.4902596 0.2206765  
0.2142133 0.289330726 0.299660177 0.293589848 0.2326357 1.103632  
0.3731396 1.328933 0.2993828 1.151989361 0.1922349 2.143779 0.1997042  
0.1721276 0.565171 0.279228515 0.5501822 1.879369 0.5971099 0.6709393  
0.7428867 1.339524 1.576693 0.468720016 0.2436809 0.5868077 0.322136273  
0.1279474 0.7255471 1.224936 1.443898 1.234798 0.919400213 0.870918058  
0.40689444 0.1179469 2.191384 0.2742781 0.1316162 0.4838369  
0.3264781 0.574784546 0.7669554 0.309652325 0.1146049 0.6615371  
0.5534808 1.000929 0.1843552 1.220782688 0.5177727 0.3153396  
0.8106814 0.5635388 0.769176 1.140087 0.617513 1.052748283 0.9825288  
0.133457055 0.6580335 0.01707988 1.073290509 3.243816 0.8841503  
0.4149591 0.774078897 0.2652637 1.4737 1.404866 0.287201173 0.3353072  
0.3851639 0.2060521 0.18165 0.3730937 1.2369 0.2790328  
RAD51-AS1 2.181125 6.29737894 1.145973 3.118919868 2.890920522 2.115380495  
2.748271 1.943556654 0.2635509 0.6797871 1.112297922 2.184361 2.682121  
5.103121 4.56649 5.948037 2.182648 1.823082037 1.346014 1.12205 1.54147092  
2.173856 5.400232127 6.205227 2.709929 1.901302874 3.280299 0.9146843  
4.934955 3.388953 3.843896 2.024350084 2.329144 3.557206284 2.569887 5.146846692  
3.897851216 3.80237134 3.915318 5.761774 2.536350696 7.811802 0.56059266  
7.76263 2.379531234 5.548428 3.967806 1.139554 1.024834223 1.221667 4.093436  
2.055532 3.477210323 2.295655 1.513191916 7.008583 1.397333 6.051225 0.2902546  
3.543296 1.262276 5.938345 6.336740032 1.827458 0.5809781 2.236428 1.045655  
3.348132 5.849337 0.3461068 2.893958 7.182912655 0.6017288 0.46264  
2.3846398 1.98104 0.524070908 4.878675 1.900961 8.980372 1.472096 0.8598456  
4.684645 0.820519599 6.498116788 0.7840249 0.5546518 6.966695 1.909436633  
2.397242 0.6783267 1.395112 5.534848171 3.516704 3.138134 1.412965442  
1.383696 4.844596326 0.936371379 0.7744367 0.348668437 0.535434 1.585477  
0.815318939 4.784419 1.219406 1.133954459 3.83493 8.093571786 1.457792318  
1.064054 5.001361388 1.685256 6.878741 8.92296 1.301018 2.872488 3.741986338  
5.093544 3.851854 0.9150648 2.084463 1.347988 3.209861 2.87549 5.134701  
1.107197 4.825799 9.969209 6.394961445 4.243407624 1.028009 4.632823673  
3.815891651 1.992234 5.931824423 2.198222 0.869395 0.596137487 5.490289663  
0.779701675 3.277438182 4.859508 1.906986 3.489837 2.597617 5.81569 4.065137  
3.23248666 1.772042 3.567457 1.839731699 6.357478 2.854265 0.796988482  
3.717726 1.481475 1.261807944 3.53183 8.664305 1.010244731 3.814255 4.00981  
1.59503 4.392987844 3.600613 3.339728 0.824673871 1.146952 2.720996796  
2.738903 0.8128091 1.599374559 2.038466 6.802469123 4.161428 10.67023  
1.255225 1.399345 0.3622767 3.055738645 1.190888 0.6918317 9.75393  
5.813821 3.709913 0.2267871 5.74025 5.05197 4.28782909 1.213226521  
7.010648 2.744648 2.637281 1.568213 5.103009254 2.446751 4.714138719 4.100282  
3.704869 1.191932588 3.630882704 0.7465308 1.158887 2.200371927 2.372453  
2.321862 2.387085 4.21701 2.881738 4.589891 2.481864 0.3710307 0.3064735  
3.630309 10.34025 0.6211551 1.297395 3.702089859 6.041655 2.52428 1.001845399  
0.972784 3.782861 4.037767 4.251188 2.533702 3.778327904 7.973188 1.637789

3.312332 1.151628 3.177094 0.541914533 0.8034308 2.553124 1.179763 4.201588001  
0.793414271 5.518983 1.915951 2.421816 3.726389577 2.815206 3.587597 2.123531929  
4.121177 5.001024 0.3162865 2.286087 0.8779841 1.39608 4.866031404  
2.459626 0.727055739 1.794565 13.17189 3.589126 1.121164 3.99962 1.505074  
1.717828 2.722529377 5.605779 6.001591 0.587912493 2.128516 0.5067334  
2.872367 2.586708 1.798832 2.116385 2.040669 9.735836 5.34913317 0.6517104  
1.79943298 3.555656 3.473725 2.6884 3.621729756 2.787791959 7.788162  
2.774302 4.53587 0.6309679 1.977864 0.746956578 1.421083 7.991418 1.267789  
2.544281429 1.492211 0.4572704 1.699865277 0.7118946 1.974357668  
0.3327968 5.972389 2.539789208 3.301972 3.61747 4.77463471 4.549273444  
0.5388485 1.136918 4.20455 3.806213 3.008919 5.813133 4.751664 2.518023  
1.426086 2.417616492 0.5392734 0.919944443 4.052177 1.026094689 4.973057  
1.053505 2.202128983 1.858558 0.5980116 0.5746134 1.330802354 1.006012  
0.7750878 0.748807697 5.144806089 4.058974 1.3352 2.595437 2.619714273  
5.12124976 6.864318153 0.8686035 1.868876 0.3653038 0.6196813  
1.595884 1.00804 1.145384 1.324231 5.116889 0.661489 1.241262 2.185127671  
1.760645 1.196855 4.754724 2.175382 10.30844 2.952556 1.307612 1.408891 4.193966  
1.438511 6.1162541 5.225098 1.433614 3.825356 0.9157412 5.09721325  
1.828094 7.256438 6.6134 0.5945392 5.6335 0.9389276 1.674278 1.903644421  
0.6981783 0.9427327 0.82002931 1.551914 4.934653 4.55961 1.293076  
2.892598 1.759362032 1.250630792 2.314323 6.63744 5.767813 0.84638493  
5.349479741 3.870490556 1.858938 2.069616 2.354823 2.52337 5.369432 0.8582621  
1.189447 7.878863383 6.002760874 0.8299016 4.896848385 11.09663 0.937626367  
1.844182 4.453041 2.536182 6.022146 4.380127 3.050082 5.137832 0.4806452 1.50312  
3.77164995 7.462303 2.383421 1.135995 1.714104 5.907556865 2.240279 1.55879  
3.961561 2.720600418 1.880902 1.313712 0.9293348 1.259884 4.868743 1.538178  
2.413994 8.050002482 8.093115118 6.092977639 0.5115823 1.391015607  
0.715249093 2.994634 1.965432 3.785479845 3.563375 1.133271 1.023304 5.412287739  
1.106336 1.034663 0.8872233 0.638538457 1.411454 2.733934 1.101781 1.640453  
1.305412 3.989584 1.273186 0.5903737 7.858081 4.887825 3.881722 0.945802252  
5.687547 1.582447 3.09827 3.880041 0.8883065 1.248499 0.9742988 0.681272164  
0.921834241 1.108822573 1.131435 3.09841 1.084512 3.417312 4.698926 4.690693978  
1.610056 6.733083 0.6405352 0.9022239 1.047923 0.741419261 4.691036  
8.178675 3.245729 2.740108 5.813829 7.395956 4.39253 2.596366191 1.955338  
3.328963 1.090651613 1.145899 3.696527 3.574443 5.060503 2.438248 4.428526065  
5.410373032 1.809628999 0.9260729 5.342836 1.179029 1.273623 2.994672  
1.169468 2.348594249 1.807596 0.76144164 0.5450913 3.96124 5.096154  
2.877336 0.685651 2.555940861 1.975375 1.581463 1.868255 2.288317 1.204705  
4.004349 4.315673 3.990341034 3.312389 1.273215373 0.4669343 0.1989464  
2.706634953 9.556468 3.96686 1.429017 2.697233819 0.7857985 5.866319  
7.776593 1.24689122 1.796602 1.440075 0.3680144 0.3197297 2.473759  
3.112711 1.307807  
LINC00106 1.709027 1.47341431 0.8828394 4.697204604 3.001310247 3.948363757  
1.133076 0.877718569 0.05393128 0.1277048 0.187446073 5.578747 1.220809

8.096654 17.0975 8.886357 1.012389 1.178496829 0.5052883 0.9226869  
1.181378643 2.791774 6.709617094 2.206984 1.839711 2.228308282 0.88958  
0.3866233 1.34784 2.6366 1.581392 1.218157597 1.839975 6.218185607  
1.218041 6.55564014 5.141929687 3.095739844 2.983794 4.75193 1.413580934  
5.55722 0.276900382 15.13417 1.874005755 4.417274 7.932527 0.9497213  
0.373221808 0.3928473 2.484761 5.0183 5.204369365 0.7761372 0.949289859  
5.71634 0.5409688 3.221482 0.1663081 2.054382 0.1662644 4.368783  
10.678766986 0.4507315 0.02728564 4.058926 0.3256151 3.979875 2.935241  
0.1322065 0.9021077 4.871774397 0.1346775 0.1293074 1.806927416  
0.5553919 0.634391125 2.884507 0.4973512 9.133507 0.1895441 0.212357  
3.707712 0.327309563 3.042652069 0.4492251 0.2103091 1.484943 0.889257002  
0.4868945 1.203004 0.433939 10.007143993 2.434598 3.374522 0.566713707  
0.3477282 1.031019882 0.719041382 0.1365327 0.146895287 0.1704385  
0.7294006 0.278068879 3.524583 0.8809531 0.174657327 2.47307 6.629812849  
1.400172969 0.1778216 7.395212653 0.6556585 5.415145 4.084821 0.4066082  
0.7213989 3.935769036 3.197193 9.80676 0.1170329 0.05018239 0.4003088  
3.957125 3.007083 3.015392 1.392015 5.982311 8.677454 7.967479024 1.569916513  
0.3388177 1.977551621 5.395749801 0.5366009 4.413993604 1.496461  
0.1800505 0.182984287 6.483391498 0.375769335 3.623521681 4.600519 1.23541  
3.631202 2.699106 3.822439 3.96025 1.329385912 2.15758 5.499103 5.467246238  
2.596447 2.12074 0.200726532 2.889562 0.2899782 1.184194408 2.430139  
0.8311802 1.315552107 1.717151 5.003785 0.2577693 4.212995084 3.150339  
4.053677 0.20769927 0.09837913 0.991505945 9.34263 1.320692 1.428153344  
2.096385 11.901935361 5.312152 20.68563 0.5472251 1.02729 0.409687 3.489881207  
0.4715402 0.7144434 6.718377 8.309603 3.489324 0.02320408 7.120862  
2.574287 6.576859114 0.100261443 6.442217 0.570221 6.393076 1.567227 4.245700543  
2.520309 9.956661949 6.051358 4.030614 0.375441056 2.207398677 0.366636  
0.2436738 2.226704198 0.7551953 0.5258356 2.326852 1.892496 6.24932  
11.13897 1.867327 0.0817656 0.3471184 4.521889 8.117957 0.1859206  
0.1376615 5.637648516 8.443183 4.313659 0.587076481 1.85793 4.798091 2.59615  
0.7846466 0.5816278 3.646415531 10.63755 1.517328 4.121302 0 1.56377  
0.258751984 0.4249331 2.753156 0.4224828 3.600581904 0.252558296  
3.763609 0.7179627 2.803589 7.603705535 5.044633 5.724725 1.147351651  
1.168363 3.886992 0.08237438 0.9322039 0.3007431 1.052521 8.321325045  
0.9063958 0.23143516 0.9639723 10.99745 2.276538 0.4827258 3.326624  
1.458108 0.7030494 3.482425377 4.357782 2.843061 0.153117259 3.248887  
0.02103946 0.878535 2.265761 3.371985 0.9870256 1.580065 8.622958 3.016369457  
0.2489416 0.775772339 9.749287 4.376815 0.6974165 4.474724023 7.00151013  
4.831345 1.801547 9.029693 0 0.786988 0.442744067 0.4478332 6.967841  
0.2403558 1.8427304 0.2471089 0.0893194 1.092310499 0.08268169  
1.116368667 0.488336 2.366578 2.910461147 3.077557 1.994661 1.17245856  
4.978919373 0.1543728 0.8203109 10.21788 4.290211 7.183455 5.911981 4.85904  
2.206281 0.3169818 4.050033674 0.1853934 0.316261982 12.37859 1.091859832  
3.030066 0.02874429 2.119363155 1.905617 0.08566112 0.2802025 0.618254417



0.5952139 0.1124315 0.227142303 6.265275883 1.333533 1.154341 0.9720823  
4.594975946 3.217870331 11.098606786 0.4443628 0.4323169 0.04360608  
0.2863392 0.1565751 1.184246 0.3750137 0.4574016 3.267974 0.484787  
0.2402735 0.831760939 1.209649 0.6857655 4.140669 1.224663 8.119586  
1.478215 1.191951 0.4569375 5.442154 3.052697 11.168978423 7.93881 0.2904018  
1.710106 0.4342303 4.244639561 0.5360957 30.95919 3.568991 0.2796421  
8.349711 0.3050403 0.3719797 2.684455863 0.404293 0.4464135 0.798296704  
0.03500805 3.702577 3.865801 0.4567176 3.185615 3.600238908 3.899025411  
1.691662 2.045049 10.88418 0.149217135 6.227007485 0.852956339 1.784353  
0.9247329 1.303897 0.9112327 3.592784 0.4002706 0.4951223 8.483596269  
4.071736465 0.1857466 3.993349064 19.37904 0.781432097 4.377619 3.318389  
1.750511 3.086869 5.385315 3.801629 6.279811 0.2677468 1.067662 5.103362457  
5.26017 0.352629 0.7937736 1.072049 3.920549454 0.3516765 0.775043  
1.753303 0.953413156 1.269298 0.7284402 0.4698386 0.06117624 5.604225  
0.6034034 0.6531557 3.571131856 3.800931336 6.66272398 0.2398278  
1.177407559 0.230883605 3.481944 0.03937551 9.224904903 3.819769 0.4313756  
0.415314 4.106322294 0.2061465 0.3752114 0.3072475 0.316614183  
0.8087251 0.7997824 0.2409507 0.5435 0.300522 1.24235 1.753609  
0.4895987 10.32432 4.94222 4.406279 0.713051484 6.794777 2.766202 1.371765  
2.277827 1.204273 0.677952 0.04538593 0.166106611 0.410241635 0.385945316  
0.2179098 3.059568 0.1423045 0.8723884 4.460353 3.778468222 0.4276576  
10.72307 0.1931628 0.2393287 1.770504 0.200383584 4.161496 10.85888  
2.084516 2.294202 7.127147 5.326434 4.303151 5.4917834 0.2839611 2.683423  
0.429986626 0.1518079 4.684818 2.384435 3.747548 2.171445 2.252854634  
6.765363442 0.28801903 0.2040826 4.40674 0.392256 0.4054176 0.9813995  
0.7731617 4.231892829 1.017743 0.153082625 0 3.008802 3.306941 4.089473  
0.2158569 6.49736318 0.4507314 0.7599844 0.7563032 1.436512  
1.218112 4.097113 4.354114 2.365197481 5.144614 0.593793719 0.7067114  
0.1519879 2.718678318 17.05981 1.842051 0.4415035 2.715562512 0.3278456  
2.291756 6.078667 0.406589007 1.790269 0.2221488 0.5729954 0.3771693  
4.501194 4.025612 0.6429234  
AL109811.3 0.5087792 6.416634642 0.901105 3.580771098 3.308995858 1.202768067  
2.787507 1.90374131 0.1467923 0.8472553 0.637747558 1.931066 1.873172  
4.828067 3.130186 3.85401 1.783009 1.403359442 1.212447 1.275956 1.320661051  
2.265015 8.980319275 2.739481 3.104586 2.302490363 2.064308 0.1169252  
0.8000677 1.477494 0.7825992 1.639794754 4.253882 5.430072274 2.560156  
3.236578416 4.930234776 3.595349609 3.459118 4.878609 1.113761529 5.509646  
0.678310453 1.611491 1.811133065 4.59975 4.368295 1.696399 0.94812639  
0.7776488 3.555378 3.658662 3.019936156 2.307095 0.947398553 5.105283  
0.6809989 5.480222 0.3536436 2.850669 0.452545 8.288814 6.307297113  
1.887413 0.4641694 1.826073 0.3545088 2.221287 5.283803 0.7421802  
1.403081 7.142069263 0.4948701 0.4399425 2.661199225 0.9566147  
0.158281801 3.443805 1.47216 2.79982 1.12855 0.2601007 2.149837 1.457810115  
8.799209892 0.9875802 0.4452215 6.422313 2.273722675 1.830935 0.4880091

0.8081294 3.765689306 1.185243 2.416179 2.038308216 1.183075 4.479238986  
1.016194293 0.5342038 0.459799134 0.4175154 1.173138 0.491958182 4.61902  
0.6821364 0.78439208 2.531683 5.456100179 1.199165181 0.3457156  
3.718606931 1.520963 6.666808 2.749669 0.8992116 1.599915 2.24453009  
6.498791 5.664843 1.369742 1.024413 0.8492285 2.554971 2.648022 1.10911  
2.267094 4.086749 5.672191 7.443143467 4.84827975 1.241433 4.450977372  
2.08439262 1.510332 4.229992644 1.930492 0.4900686 0.66407171 7.361513366  
0.596623802 1.439801886 0.8798048 0.6911983 2.55325 2.046534 5.102757  
4.95043 3.327064716 1.986316 4.380782 1.6326238 3.897305 2.58089 1.075617347  
4.338707 1.452982 0.763386304 4.479785 3.933384 0.927732295 3.027354 3.644654  
0.8610626 3.031111011 3.490592 3.752186 0.830319611 0.4819899 2.977897522  
4.155088 0.8986776 1.133767712 1.290648 6.263368778 4.580467 7.976254  
0.9043143 1.415108 0.4274558 3.079090982 1.226833 0.6900193 8.131757  
3.811082 0.9279048 0.3789466 4.954103 8.3303 3.772556861 0.545791029  
6.059779 1.409098 7.769931 2.29876 3.116735088 4.341016 2.773516676 3.577373  
3.016938 1.034055497 4.094618538 1.559256 0.4767043 2.496850244 3.351391  
1.985845 1.930889 2.096365 2.915533 2.643624 1.498704 0.6120202 0.8892238  
1.912113 2.640833 0.3614613 1.348893 3.100484764 1.228844 2.762608 0.887737616  
0.996073 1.021072 3.555513 3.737443 1.393126 4.942940832 3.978058 0.9689433  
3.841293 0.04988917 1.746187 0.762971368 0.7228746 3.746824 0.5580544  
4.005923023 0.458282027 2.411933 1.150444 2.004079 3.125105495 3.220776 3.17351  
1.597766149 2.929036 3.082122 0.8407867 0.6017976 0.948802 0.7639446  
6.080210833 1.790611 0.498694001 2.137893 7.626775 3.614549 0.6948519  
4.495828 1.034706 2.200625 1.103672776 3.131186 2.118835 0.468855606 2.193731  
0.4867612 1.873131 1.959077 3.073765 1.51117 1.505239 5.024435 4.694840177  
0.6564047 1.294161998 6.81249 3.527309 3.487013 3.42547839 3.710844854  
1.912748 3.269014 3.446346 0 1.463737 0.903808578 1.011158 4.109157 0.4179674  
2.145568903 1.261107 0.5064855 1.687849901 0.4688464 0.886251294  
0.7911739 2.961584 2.178496895 2.128484 2.198214 13.82872198 3.537422905  
0.3501483 1.034291 2.977104 4.233008 2.767134 3.088986 4.901678 2.395309  
1.342092 2.376451543 0.2523056 0.627677036 1.462047 1.200176961 3.449613  
0.821492 3.3873553 3.051048 0.6023191 1.191666 1.332207986 0.1918511  
0.7267985 0.446510131 3.036428421 0.6170428 0.8624904 1.288112  
3.835414098 3.598345153 4.130084996 0.4837936 1.063553 1.157215 0.480611  
0.9375787 0.9613429 1.233378 0.6591036 3.875634 0.8246952 1.40607  
1.280901783 2.717842 1.418573 4.042012 0.7592598 6.258466 0.8382213  
1.135505 1.900113 2.564964 1.204798 4.224438091 4.8914 0.9315747 3.785986  
0.5417065 4.397123268 2.609663 13.23184 1.963831 0.6227515 5.808708  
0.7359216 0.7593516 1.365191153 0.666044 1.017618 0.853613816 0.667004  
4.076936 2.651736 0.5006978 2.812129 1.138444714 2.348378523 1.243939  
4.589752 1.450828 0.583833481 3.490773394 2.690956926 1.438337 1.462066  
2.796765 3.120955 3.251748 0.7781943 1.208915 5.96030811 4.693811903  
0.7330797 3.426177748 5.235153 1.82783255 2.711729 3.788473 1.550129  
6.560434 3.969864 1.029594 3.461065 0.8589 0.871801 2.400832584 6.534747 2.05048

0.5761398 1.247186 3.750734828 1.375985 1.155225 3.643299 3.227577502  
1.711117 1.255708 1.278825 1.207211 3.288041 1.132238 3.738577 4.860023123  
11.435498244 6.363109653 0.5802423 1.458555689 0.196383756 1.978507 1.6344  
3.383551327 1.909146 1.544914 1.014051 2.503591663 0.3682203 0.6638222  
0.7222403 0.718144047 1.052757 1.970451 0.4262889 1.327037 1.045187  
1.831633 1.08189 0.9237402 10.62851 1.916538 3.155349 0.698692103 1.992395  
2.039146 2.92841 3.967922 0.6803057 0.9703607 0.9882655 0.437986858  
0.610647032 1.575721565 0.5931155 4.240934 0.7101049 4.518147 3.996431  
2.436951498 0.8730114 8.929571 0.6966295 1.009692 0.9253929 0.559047167  
1.532466 8.772007 1.599209 3.742907 1.950438 3.943757 4.724363 2.436104937  
1.317437 3.355821 0.975295336 0.6972693 2.625272 2.781449 2.768632 1.548789  
4.155174355 3.393232636 1.679874539 0.3372557 2.042531 1.690458 0.2605442  
2.735838 0.9246701 2.506730729 1.568384 1.302082095 0.3686623 5.207438  
1.149059 1.893999 0.5581513 3.321743832 3.748612 0.8353781 1.108442  
1.386257 1.894573 3.292402 4.341214 1.830322757 5.241986 0.577218196 0.5495871  
0.129277 2.670364375 6.848808 3.377919 1.037833 1.532347694 0.5354058  
5.068205 4.350907 1.363575349 0.9474934 1.079738 0.4834764 0.3849728  
2.367759 2.340513 1.463307  
AC084876.1 0.02466224 0.483833605 0.3821965 0.29355807 0.842090404  
0.296811294 0.1878262 0.126659856 0 0.1179427 0.420427296 0.5152291  
0.1768606 0.4491917 0.2210181 1.330265 0.2199997 0.247365665  
0.1719283 0.1374442 0.077933603 1.066054 2.406987868 0.7391549  
1.155373 0.190552739 0.3159914 0.1190229 0.05297051 1.34644 0.05310931  
0.122286729 0.429949 0.957141414 0.2749828 0.477484776 1.606939119  
1.268319019 1.530947 1.206245 0.595501484 0.5805893 0.179013289 0.1458135  
0.82775049 0.2163427 1.472781 1.699423 0.183835516 0.09895005 0.6005131  
0.7330371 0.117951692 0.7168069 0.14612054 0.3959524 0.1249039  
2.571802 0.1343956 0 0.1535546 0.3085451 1.577991902 0.09606374  
0.1763989 0.4647086 0.08019309 1.651974 0.9364798 0.1526253  
0.2380422 0.851230472 0.1741352 0.08956708 0.20574251 0.3526436  
0.058589633 0.7023289 0.04593322 0.6263847 0 0.2353486 0.4581788  
0.05496164 3.808374098 0.2233996 0.2373952 0.2556902 0.273759826  
0.09466837 0.1495634 0.04218604 2.727631039 0.1828041 0.3953849  
0.224311019 0.3853761 5.932973166 0.127706858 0.0945718 0.054266465  
0.06296385 0.2449611 0.256812443 0.482245 0.2524998 0.258089579  
1.071266 1.154075123 0.490501177 0.04692239 1.129946689 0.4403913  
2.938847 1.582043 0.2816443 0.4441686 0.623126883 0.7949818 0.432148  
0.2377904 0.04634629 0.1957277 1.017482 0.8168271 0.2634352  
0.5901139 0.3697838 2.334823 1.995503882 0.371771101 0.1444234  
4.5308311 0.752683247 0.02252643 0.441628897 0.8637921 0 0.084498204  
2.621868703 0.096401216 0.586253186 0.08331062 0.4563885 0.2459323  
0.8190557 1.455214 0.3251125 0.645096123 0.7267306 1.065295 1.053453837  
0.634756 0.1506634 0.301246371 0.8160411 0.2678114 0.402931409  
0.2856473 0.8374279 0.154634745 0.6247433 0.8136057 0.08656896

0.941756386 0.2574794 0.550559 0.143866577 0.07268698 0.315762827  
0.6485437 0.2246879 0.52209662 0.7145246 1.8994873 1.423136  
2.801973 0.09626544 0.5322314 0.2017969 1.611552008 0.2561731  
0.1489937 1.12565 0.4395026 0.1111238 0.04286058 0.3538936 0.23775  
0.727888483 0 2.362403 0.1663047 0.5999092 0.2251547 0.270423877  
1.600259 0.973866195 0.4299057 0.3722502 0.247672281 0.335121924  
0.05643486 0.05626165 0.231716971 0.454869 0.2428196 0.1834496  
0.2642065 0.4439695 0.125457 0.5748608 0.1510304 0.1885786  
2.207432 1.249566 0.04905949 0.02542764 0.356622563 0.9530596 0.1952897  
0.240977137 0.571968 0.1882024 0.7587635 1.35481 0.1933799 1.431923688  
1.530711 0.2587087 0.0639707 0 0.2962525 0.132762329 0.2616332  
1.518028 0.1836174 0.970902895 0.466503936 1.305764 0.08555863 0.9677085  
0.337077842 0.9490567 1.020678 0.345000562 0.2271683 2.165782 0.1267957  
0.5298113 0.1262515 0.2592168 0.907479559 0.3510454 0.320615323  
0.362708 2.66088 1.086298 0.2057653 0.640068 0.1346646 1.558335 0.771011196  
0.9006232 2.58405 0.094275005 0.6924305 0.136018 0.2163672 0.2832035  
0.470071 0.4557872 0.145928 1.027586 0.544349565 0.1149559 0.092447733  
0.363391 0.3161527 0.02800451 1.16231131 0.617384786 0.3245107  
0.6198587 0.5613082 0 0.2422761 0.272599571 0.2255997 5.209446  
0.07399409 1.248035399 0.06846574 0.05499437 0.420337894 0.02545375  
0.206206007 0.1503354 0.904415 0.836259386 0.9086037 0.4605457 0  
0.338111438 0.2851442 0.289672 0.1790178 0.8254696 1.146952 1.12126  
1.431841 0.3892094 0.6830851 0.704719961 0.0856107 0.17038347  
0.1777047 0.1034251 0.1883564 0 0.500718095 0.3623417 0.2637097  
0.1940872 0.190331053 0.5497139 0.05191844 0.116543806 0.707681753  
0.2216869 0.5435016 0.1575041 1.244825101 0.727384804 1.537529302  
0.1641577 0.09213906 0.402727 0.1057802 0.3181332 0.1343163  
0.3463465 0.1987936 0.4311657 0.06105388 0.08876251 0.283013165  
0.1264732 0.5320085 0.1965681 0.1005374 3.649907 0.8342983  
0.09435728 0.187559 0.369889 0.5638678 1.152085883 1.459093 0.5364052  
0.6450989 0.3174872 2.896242292 0.8759725 2.983316 0.6104012  
0.140872 1.30577 0.1792777 0.1988941 0.443654878 0.0982599 0.1030721  
0.147454493 0.3556512 0.5595612 0.8349867 0.3046367 0.4969758  
0.078235897 1.532846183 0.7307749 0.3976251 0.508166 0 0.35757488  
1.110016645 0.7098867 0.351665 0.1047151 1.262363 1.063094 0.05281038  
0.3227814 1.131420105 1.150264617 0.137238 0.224492146 3.284587 0.721697039  
0.6691829 0.6469967 0.1107326 1.679297 2.582469 0.1572099 0.7610548  
0.07065126 0.2958139 0.814635081 2.674165 1.421118 0.2443651 0.3513252  
0.358500066 0.1623967 0.2726843 0.5571699 0.330199252 0.5087206  
0.2018268 0.07232045 0.05649974 0.391062 0.3208567 0.81613 1.263774657  
3.28470946 1.583332277 0.07383153 0.195174884 0.133271348 0.1326092  
1.200062 1.122110117 0.9365773 0.1048421 0.2933153 0.879842011  
0.142791 0 0.07738925 0.454861908 0.03247407 0.203764 0.133519 0.2657399  
0.5550983 0.3442143 0.4534762 0.1027664 0.3551755 0.1963192

0.4069449 0.184392222 0.2064264 0.4612733 0.02484123 0.1963456  
0.1259111 0.107953 0.04191649 0.095880571 0.189440755 0.219349216  
0.02515652 0.5581601 0.1095219 1.521878 0.242317 1.122750701 0.05642374  
1.346633 0.08919843 0.2652404 0.5213558 0.14805252 0.09043244  
1.179858 0.4907293 0.3829204 0.2623391 1.581966 1.736627 0.545718795  
0.1907304 0.1004714 0.370642658 0 0.5090231 0.648851 1.344875  
0.4349175 0.82130508 0.557351029 0.342002539 0.02692599 1.199335  
0.04025231 0.1872131 0.1461901 0.08655258 0.281179425 0.3040995  
0.03534513 0 0.09061304 0.2599275 0.2966121 0.07974244 1.492233804  
0.1850116 0.2429615 0.4029744 0.578924 0.1874992 1.405455 0.2365454  
0.685300252 0.2215653 0.313372749 0.06993088 0.03509236 1.441011996  
1.052329 0.4901875 0.2224111 0.407801075 0.02018561 0.8525062  
0.7414711 0.080466021 0.09185639 0.1172383 0.02116776 0.2488124  
0.2063813 0.6823961 0.1228503  
AP001767.3 0.07251604 0.622408655 0.1498397 0.239769015 0.722182654  
0.467536139 0.2761389 0.335183811 0 0.130048 0.290873067 0.4940095  
0.2275153 1.398482 0.5776659 1.127033 1.17247 0.363672916 0.2888756  
0.2424818 0.420114554 0.03644871 1.882294582 1.811155 1.14906 0.28014749  
0.4955364 0.1749855 0.1168145 1.052933 0.07808043 0.323611073  
0.6020037 1.172644584 0.3675229 1.403980466 0.705222494 0.979737491  
0.2625901 1.35835 0.942842329 1.843717 0.413572313 0.1224987 0.442525491  
1.590317 0.8883109 0.5641693 0.101351977 0.2424579 0.5675557  
2.120634 0.260115945 0.6655817 0.214824005 1.552327 0.3672632 1.705166  
0.141133 0.2187793 0.1128768 1.814472 3.30591113 0.2353855 0.1111452  
0.5921126 0.4715942 0.4250233 0.3985465 0.0897549 0.2333105  
0.45972183 0.3291567 0.04389335 0.336088045 0.2592254 0.229700028  
0.8901313 0.3038862 0.4297535 0.06434065 0.2306704 0.8154188  
0.686831409 1.739497851 0.3284384 0.3172859 1.606168 0.695187848  
0.1043849 0.125649 0.2170743 0.389331855 0.4568844 0.4445146  
0.293136317 0.5665736 2.046032398 0.112651508 0.1853839 0.03989083  
0.09256841 0.2250861 0.453073696 0.8153369 0.08249355 0.379439038  
0.9212019 1.649571572 0.098335463 0.1379691 0.258413394 0.283262  
1.629716 1.550596 0.4140689 0.5078962 0.508950474 1.725326 0.6882815  
0.5085026 0.1703439 0.3197286 2.045394 0.2744882 0.2766415  
0.402803 1.055321 2.783204 0.855679082 0.300614453 0.3538816 2.117110663  
0.228948099 0.3642979 0.399554161 0.465642 0.2037269 0.041409288  
1.510597487 0.028345495 0.251387428 0.1224819 0.4100402 1.544871  
0.5759036 1.465906 0.7169627 0.244750882 0.4135848 1.129106 0.694276402  
0.6739834 0.4430057 0.136273058 0.6809279 0.178969 0.211565394  
0.6599277 0.6668852 0.454682897 0.5298966 1.387534 0.2227264  
0.182178248 0.7570839 0.7689517 0.070503422 0.3473054 0.510652223  
0.8705671 0.04719034 0.323190665 0.4405248 0.686703654 1.211315  
2.371784 0.3538197 0.2721662 0.1112544 0.602358597 0.2259728  
0.2816332 0.8880017 0.6958532 0.1633723 0.03150646 0.5636458

0.9320965 0.516614303 0.045378268 0.9004502 0.4889968 0.8819766  
0.236442 0.851941538 1.657566 0.440542153 0.446146 0.7297014 0.024274913  
0.16423024 0.3318784 0.04135747 0.255499849 1.025403 0.3212904  
0.346763 0.4780702 0.5959586 1.06978 0.2600464 0.05551059 0.08317353  
0.6578371 3.335771 0.5409484 0.1869165 0.664114098 0.6368966  
0.4019563 0.088570152 0.03822263 0.1760767 0.7139338 0.7411421  
0.3474826 1.05259528 1.309339 0.2218704 0.6113163 0 0.9255341  
0.35133297 1.057784 1.394862 0.1012317 0.535277026 0.342923191 0.648917  
0.2515738 0.7305803 0.371674707 0.4228144 0.7502917 0.144918323  
0.6262109 0.9159732 0.07456519 0.2596399 0.2598581 0.04763703  
0.708773276 0.1985004 0.209494824 0.5090088 0.954142 0.8242877  
0.1512563 1.191955 0.2545479 0.9068692 0.809662806 1.406837 1.164218  
0.138601555 0.4750666 0.08570202 1.033823 0.3700987 0.5615112  
0.1435909 0.1716328 1.476405 1.176902561 0.2112578 0.339787825  
0.2968064 0.5312028 0.370546 1.480969442 0.429948434 0 0.7674156  
0.6287436 0 0.2849522 0.450867811 0.1381971 4.234889 0.6527093  
0.667214922 0.1342096 0.2021295 0.339885606 0.03742168 0.555794554  
0.06314874 0.5540233 0.39518188 1.267311 0.4121397 0 0.695920193  
0.2096071 0.1310372 0.7519685 0.2427183 0.4628866 0.9675736  
1.283579 0.3365937 0.2869315 0.438336313 0 0.286279959 0.2612585  
0.076026937 0.1977989 0.3512605 0.635763729 0.8371138 0.1938509  
0.2377865 0.3264585 0.1276074 0.03816482 0.068536312 0.489610365  
0.1086402 0.4609887 0.3704959 1.206216316 0.397201676 1.177317807  
0.482684 0.2257689 0.236833 0.1036776 0.3826752 0.5077789 0.5516256  
0.7671905 0.6972819 0.2992013 0.2936187 0.118880366 0.3408879  
0.8566406 0.735614 0.2217127 2.53667 0.5575325 0.1618429 0.2412779  
0.5118162 0.1657978 0.787803554 0.429027 0.6196253 0.4578549  
0.1473993 0.989234086 2.799653 0.3908337 0.9572286 0.1035539  
1.014192 0.07530602 0.2392453 0.230207321 0.1155681 0.1212279  
0.092907926 0.1426016 0.3656256 0.8466094 0.2067101 0.5260648  
0.230042249 0.357708753 0 0.9743031 0.3502018 0.151955064 0.438083903  
0.842285492 0.633653 0.9970946 0.4618511 0.5773927 0.473619 0.3493843  
0.3559109 1.372301003 1.235803879 0.4539714 0.754387761 1.970998  
0.530513534 0.4919109 0.700887 0.4883918 1.894717 0.6562204 0.07704245  
0.733066 0.1558055 0.0966446 1.154889363 1.048404 1.044652 0.2874092  
0.4695568 0.527060877 0.4775058 0 0.4607674 1.100361239 0.6178409  
0.1648458 0.7442703 0.4983899 0.2705566 0.4220636 0.6781822  
1.268864821 1.437678615 1.163894484 0.1809098 0.163967366 0.156746668  
0.6336196 0.3207839 0.641553019 0.7343683 0.1849645 0.1326853  
1.33813365 0.2449172 0.2547307 0.1137764 0.095532924 0.2864571  
0.2995705 0.2617299 0.3038672 0.4080482 0.7872016 0.317473  
0.0604342 1.405851 1.082345 0.1994279 0.309817599 0.1213939 0  
0.1095635 0.7422789 0.06170412 0.1269685 0.06162493 0.169154439  
0.417769005 0.161241797 0.1479388 0.8718851 0.1932208 0.7238778

0.4932699 0.267672898 0.1659065 2.722222 0.1049104 0.129984 0.2438827  
0.027208046 0.4985711 1.734608 0.665965 0.7506176 0.1051873 0.7965002  
3.093252 0.141583546 0.420613 0.443134 0.311378695 0.4895456 0.534541  
0.7226743 1.715522 0.6038858 0.563485611 0.690028024 1.005612969 0  
0.4913956 0.207124 0.1223278 1.203587 0.2226843 0.289369743 0.2032191  
0.467674441 0.08654511 0.4440593 0.04776764 0.377931 0.05861801  
0.326744733 0.5440021 0.3968867 0.5134535 0.3191717 1.299532  
0.3708702 0.3477652 0.472273647 0.4705157 0.201563005 0.3427041  
0.3095532 0.320992733 1.33224 1.059802 0.3814826 0.329748323 0.1483827  
1.080466 2.141265 0.236599632 0.5064216 0.08618092 0.09336146 0.1828999  
0.3034183 0.6918948 0.3010208  
AC129510.1 0.1139351 0.977910535 0.5297036 1.092482675 1.458864728  
0.391775629 1.115644 0.409601999 0 0.1702731 0.571264221 0.7244286  
0.5872648 0.9460401 1.134515 1.380152 0.4764183 0.542822782 0.3687718  
0.6984641 0.540058808 0.4867709 5.323332571 1.215862 1.805369 1.056383186  
1.070537 0.3665762 0.7341426 2.018292 0.5827191 0.31071846 1.655239  
2.395152974 0.6929297 1.676479161 1.578935985 1.713131222 1.41454  
1.333875 1.163930968 1.206998 0.354432489 0.4571076 0.869104118 1.963233  
3.31476 0.7597771 0.159241305 0.4571314 1.362361 2.976842 2.213719485  
0.4792988 0.438782868 1.676793 0.6347367 2.446142 0.1552209 0.9882516  
0.4877089 0.9045952 3.280517218 0.4068141 0.2328374 1.681715  
0.2315485 0.977827 2.049332 0.423061 0.8706055 2.086649317 0.3735055  
0.06896396 0.818480364 0.4998527 0.744352254 2.964923 0.3183048  
0.1446892 0.4549058 0.2265141 2.757285 0.3491302 2.391417767  
0.294876 0.2243297 2.416178 0.804822499 0.3006787 0.2714471 0.4141453  
1.43751142 1.034539 1.047613 0.805992827 0.5563651 1.268947547 0.32449047  
0.1820436 0.156688307 0.3999622 0.601203 0.533892247 1.364579 0.4536402  
0.260821609 1.610778 2.73985983 0.824009839 0.02709663 2.929084227  
0.3814741 2.560564 1.077573 0.4337154 0.5699942 1.919155949 1.005613  
1.663705 0.1997362 0.2408755 0.4018786 0.9832855 1.320758 0.3042558  
0.77892 1.281251 2.550852 2.592806733 1.567232895 0.4170064 1.500910974  
1.588748553 0.3382212 1.687126444 1.13066 0.1600449 0.09759162  
3.723794091 0.200410312 0.846370028 0.5773201 1.288487 1.962463 1.645169  
1.431713 1.501961 1.345909353 1.083021 1.373434 1.762105262 1.181129 0.5872819  
0.321162451 1.477418 0.3936674 0.897494709 0.8483394 0.8865922  
0.408219805 2.414419 3.946647 0.2749539 1.71739927 1.011082 1.398916  
0.13846618 0.2938257 1.021137157 4.396532 0.4077926 0.793418525  
0.3194492 3.344679852 1.730166 4.437452 0.2501601 0.3207148 0.2039331  
1.041049309 0.2662815 0.147498 2.156222 1.522817 0.3850289 0.07425306  
1.498681 1.647543 1.188545339 0.071297026 2.930577 0.3521365 2.698539  
0.2228945 0.646963892 1.134139 1.211292479 2.424194 1.337567 0.343260394  
0.93537259 0.1955392 0.389878 1.003584991 0.4903297 0.3926239 1.36206  
1.901298 1.226177 1.275095 0.9703714 0.1744333 0.1742398 1.584815  
3.873832 0.113323 0.2936778 1.263107856 2.201482 1.217974 0.278317739

0.6305701 0.2964072 1.857836 0.8369564 0.2481612 2.756345598  
2.282202 0.7718919 1.58849 0.03910232 0.9409352 0.153334509 0.1510873  
0.8327955 0.5566833 2.074495851 0.269395516 1.996638 0.2964491  
1.238488 1.103044216 2.358314 1.438181 0.796920217 0.9838845 2.021664  
0.1171547 1.886717 0.3207926 0.6736134 1.932430712 0.5925684  
0.041144028 0.4760357 4.197537 1.173682 0.1386289 1.133516 0.4888135  
0.9373992 1.373888368 2.177875 2.166141 0 0.5064931 0.2244209  
1.093288 0.672346 0.3053874 0.1504039 0.4719129 1.915089 1.553256916  
0.1991533 0.347012143 1.399001 1.043263 0.8409428 1.700395129 0.825638715  
0.09369882 2.373803 2.253564 0 0.3917451 0.393550282 0.2171313  
4.530202 0.2848661 1.004629314 0.3162994 0.2540641 0.3641035  
0.08819381 0.43662419 0.1736306 1.798962 1.517751591 0.807228 1.179452 0  
1.796316009 0.3842168 0.2573524 1.978964 1.677949 2.077926 2.280336  
1.290702 2.353366 0.1878411 1.471316581 0.197753 0.393570466 0.2736546  
0.388216829 2.424053 0.214624 0.709740219 1.106005 0.1522864 0.5230447  
0.62283408 0.3675707 0.2098721 0.053841138 0.865419403 0.3413846  
0.4104322 0.8367866 2.516004607 1.056121545 4.143479867 0.1895948  
0.2483051 0.09302631 0.3868761 0.2672214 0.7534849 0.8333637  
0.487895 1.543729 0.2350483 0.6663586 0.513648861 0.7060092 1.7263  
1.403442 0.60961 5.365154 0.9635769 0.544892 0.4603223 1.457523 0.8140524  
1.237774232 3.286115 0.3982653 1.438737 0.2508886 1.959714186 0.7917721  
4.673729 1.903462 0.3525185 1.735744 0.05915933 0.292363 0.482260141  
0.2042744 0.166661 0.316277551 0.485445 2.154227 0.9311178 0.7578128  
0.9413348 0.293666546 1.433155286 1.629816 2.143116 0.8436814 0.079582472  
1.376609599 1.695573813 0.4977887 0.4061572 0.9977647 0.3563932  
2.009169 0.4879489 0.186399 2.156119774 3.014681744 0.1585037 1.222312061  
5.651616 0.833527571 1.32033 2.08444 0.5882995 2.029722 1.491318 0.3227917  
1.5458 0.2855966 0.7212648 1.512107395 2.007551 0.3077489 0.2257845  
0.5533156 1.573395425 0.4876581 0.3543054 1.327231 0.61018442  
0.7663688 0.518002 0.4593977 0.3589006 1.540954 0.4875987 0.2458939  
3.773607244 3.793691467 2.618333634 0.1989682 0.547444198 0.246275846  
0.8040777 0.2520032 1.439985156 1.442273 0.5085691 0.1563535  
2.277640099 0.3023482 0.1600902 0.1489685 0.225147863 0.8626401  
1.117857 0.1799099 0.784345 0.7835833 2.562002 0.3990435 0.1661668  
2.966146 2.069001 1.43239 0.27381177 0.5483505 0.6147115 1.176311  
1.101456 0.751345 0.299234 0.2178524 0.044295096 0.246144981 0.285005772  
0.3777104 0.6849404 0.2023886 1.292427 1.399326 1.997659721 0.1629172  
2.00893 0.2884565 0.3063407 0.3010712 0.170993992 0.6788951  
2.787307 0.6103679 2.06386 0.5784351 2.62802 2.545729 1.297636584  
0.3579631 1.585879 0.580959708 0.2428926 1.21779 0.9537738 1.073583  
0.6697468 1.391236546 1.693987716 0.789995053 0.0621966 1.793919  
0.232448 0.5285444 1.013058 0.4498395 1.461373063 0.3831504 0.326576266  
0.06798859 0.9418858 0.1501023 0.5252796 0.2993215 1.760132248  
0.4807802 0.6547558 0.7756956 0.6964908 0.4949787 1.623237



1.216979 1.286172748 1.251057 0.384552123 0.161534 0 1.739954124 3.004721  
0.3996314 0.5137496 1.130380493 0.1631943 2.546395 1.376302 0.526629571  
0.7691525 0.06770249 0.04889561 0.4597873 1.362063 1.875222 2.081003  
CFLAR-AS1 0.06565596 0.532221152 0.1469701 0.361811111 0.186818164  
0.294746979 0.2381104 0.142371055 0.1178673 0.06541409 0.109731764  
0.6096203 0.2190711 0.5236688 0.2106601 0.9637247 0.3091113  
0.270732417 0.2615477 0.2601989 0.276633723 0.3263396 0.355994283  
0.9573891 0.3518118 0.377649677 0.2897585 0.1525639 0.08226073  
0.7668964 0.1492428 0.260441953 0.3906218 0.396372268 0.2292312  
0.79094571 0.248308612 0.635880653 0.562295 0.6528827 0.27438707  
0.607955 0.10212219 0.09550599 0.367273695 0.3839658 0.7986907  
0.04053956 0.142743994 0.08293022 0.7676247 1.398922 0.457933701  
0.7309522 0.133989905 0.8491416 0.1699546 0.3468083 0.06247105  
0.1210505 0.1135539 0.442298 0.361747544 0.2746853 0.04845184  
0.2428479 0.3143055 0.4489517 0.5576675 0.1399547 0.4400815  
0.971207448 0.05518855 0.1236387 0.351628434 0.2252195 0.181973938  
0.4692269 0.1698384 0.037057 0.5242857 0.09282167 0.4030222  
0.174770152 0.557791218 0.05664149 0.1595947 0.1684561 0.331275  
0.2800297 0.3191669 0.08423095 0.477834334 1.032805 0.3061472  
0.151133618 1.890409 0.487493693 0.188878855 0.1678464 0.076247263  
0.1536542 0.09510329 0.174720159 0.4243789 0.1618275 0.248114959  
0.4902691 1.062059187 0.484734387 0.1526764 0.549637402 0.4152293  
0.9379427 0.275982 0.1249659 0.2883179 0.517123744 0.06718747  
0.7057262 0.05754973 0.065119 0.2508844 0.4790981 0.4383641 1.09094  
0.6327658 0.916881 0.5973122 0.387365565 0.621331245 0.3560046  
0.296095727 0.345482365 0.05330666 0.743609567 0.2512517 0.0450888  
0.383250892 0.471618521 0.145429264 0.603336456 0.06982278 0.495  
0.9159499 0.7426323 0.7293789 0.577011 0.44627223 0.1906969  
0.7291617 0.440555357 0.4746187 0.3537452 0.476389734 0.4110077  
0.5725357 0.259658201 0.6276746 0.4799414 0.320187402 0.5046448  
0.4861435 0.2304644 0.568140564 0.3731966 0.4234249 0.088657972  
0.08331582 0.331580111 0.2460552 0.1139363 0.264167727 0.2795365  
0.653979336 0.2714114 1.519513 0.1139015 0.2464191 0.1119219  
0.278747209 0.5531659 0.1385133 0.8405413 0.9550378 0.1260035  
0.02852592 0.3576633 0.234422 0.798131465 0.013695149 0.9058521  
0.2787605 0.3082088 0.2331032 0.599936681 0.1613719 0.634308531  
0.3029552 0.6423191 0.18803816 0.268475138 0.1335478 0.2454729  
0.291303627 0.4171067 0.1867481 0.1511654 0.7334307 0.6337929  
1.324836 0.3825995 0.1061028 0.1450323 1.169151 0.9824175 0.09069893  
0.05641135 0.520413311 1.790805 0.8491722 0.196023281 0.09612983  
0.1948463 0.2603536 0.4147334 0.06355766 0.552986271 0.6668295  
0.2614645 0.2318015 0 0.52579 0.051052537 0.1305978 0.420969 0.13918  
0.671315282 0.24148629 1.025456 0.170831 0.7581725 0.660564462 0.8932368  
0.2687062 0.145787699 0.214189 0.3071561 0.030005 0.107744 0.1083013

0.3498365 1.245697075 0.363438 0.09483822 0.1950714 0.5855182 1.39933  
0.1572359 0.5490643 1.163718 0.2496847 0.23132369 0.6451995  
0.5424517 0.020914955 0.3925743 0.0919639 0.2400059 0.2978552  
0.1998805 2.142709 0.3151089 0.7702639 0.45464175 0.07650905  
0.123057446 0.7166086 0.4475513 0.1656751 0.767847775 0.192234546  
7.247281 0.4535614 0.6760009 0.1288242 0.211413 0.131032085 0.2057587  
31.53524 0.1495646 0.413917517 0.0742581 0.03660158 0.068384921  
0.03764618 0.152489675 0.1524662 0.5833565 0.428473365 0.3101141  
0.769994 3.89701348 0.470063834 0.1124611 0.2801246 0.7678268  
0.4785819 0.4723158 0.6561289 0.3202373 0.2844349 0.1491373  
0.485062519 0.09285357 0.187198293 0.0569456 0.076483029 0.2149044  
0.05889463 0.265929685 0.09952514 0.07410524 0.04305834 0.150133463  
0.3680024 0.08830567 0.103421199 0.313999079 0.112935 0.2195103  
0.2073247 0.297086647 0.577860689 0.772216169 0.3459755 0.07267945  
0.1608213 0.0886546 0.2309825 0.3320363 0.04695603 0.08452971  
0.7142189 0.2167173 0.141126 0.143512246 0.6266319 0.1835965  
0.4651599 0.1635647 30.71099 3.948576 0.3907532 0.1178952 0.4279995  
0.487868 0.396264824 2.120239 0.1643358 0.4704716 0.3262238 0.735559384  
0.06759476 1.240696 0.6740797 0.1458451 2.128005 0.1174246 0.1738248  
0.629148357 0.2063639 0.125004 0.906613289 0.1434571 0.4137964  
0.5280467 0.2634035 0.4762986 0.436809572 0.230306992 0.2087098  
0.4802725 0.2325198 0.101911103 0.462747603 0.211834607 0.3337261  
0.2229058 0.2168235 0.07883053 0.6575152 0.2265095 0.08354407  
0.727917686 0.438397772 0.05074387 0.275106104 25.23142 0.166780039  
0.927866 0.2669276 0.1408456 1.79634 0.8086925 0.2350974 0.8733123  
0.1201675 0.1263917 0.451817969 0.7119178 0.3590641 0.2493775  
0.3637278 0.577942804 0.1705315 0.06049515 0.2575175 0.188834761  
0.2355337 0.2553855 0.1604433 0.1295231 0.7314831 0.2023073  
0.1049616 0.205148063 0.222508209 0.505605881 0.1273966 0.12783704  
0.110380902 0.7207757 0.3388438 0.534761446 0.5055983 0.2356939  
0.08676285 0.614746956 0.03871787 0.03075106 0.05722947 0.158574955  
0.05283219 0.474654 0.06911627 0.1353771 0.4789121 0.2715168  
0.3704779 0.4468561 0.4485303 0.1851024 0.4986947 0.187005731  
0.1770771 0.03673518 0.1690052 0.5476034 0.130356 0.1021842  
0.0495957 0.087920758 0.070045872 0.125712052 0.07069248 0.5107909  
0.116628 0.1919854 0.6533683 0.448797814 0.1084862 0.7344301  
0.2084411 0.2026839 0.08061363 0.221707283 0.08693742 0.6345507  
0.3545206 0.3209263 0.1693093 1.525634 0.5038167 1.077742403  
0.0599443 0.4160729 0.113551921 0.08294441 0.3172712 0.4681942  
0.5177442 0.4431239 0.315825345 0.707183197 0.185468382 0.02389417  
0.988687 0.3482698 0.147674 0.2378371 0.1408127 0.428341235 0.1962607  
0.026137781 0.03917894 0.2859029 0.1297463 0.5615236 0.04127877  
0.474274213 0.06156738 0.2914654 0.6039472 0.2818425 0.04357759  
0.2185271 0.8619067 0.364248587 2.253819 0.538794696 0.051714 0

0.78792088 2.434034 0.2089674 0.09868402 0.781065143 0.1104619  
0.6782554 0.9399755 0.218184094 0.4720993 0.125712 0.01565359  
0.1030384 0.8110625 0.3410623 0.1907808  
USP30-AS1 0.1686882 0.384125899 1.767697 0.733049902 2.297081847 0.870073352  
3.19869 2.475273403 0.5840363 0.08643435 4.615614619 4.55292 0.1728165  
2.220422 1.223798 2.842038 0.2955827 1.256889079 0.3839931 0.6177865  
0.939202881 0.9205522 3.102572387 0.5909347 2.523545 4.319737645  
0.6587009 2.558629 0.1552779 3.806993 0.1037898 0.812535661 1.120314  
3.304569641 1.270195 4.535028122 4.148127312 4.516158163 2.493234 3.184898  
6.937857642 3.131571 3.473411376 0.08141679 1.642156333 0.0905982  
5.719517 3.106863 0.381717914 0.8701872 0.8382598 3.073053 0.950850665  
1.363969 0.656785097 2.127942 0.7566966 1.404321 0.7879351 0.8724491  
1.913054 0.4174476 3.083819539 0.5006249 0.5170961 1.513609 1.27334  
4.681179 1.781971 1.133429 0.8916302 1.052439068 0.8507675 0.4084223  
3.641022134 0.9554265 4.389161363 0.9465786 0.246856 0.5712577  
1.368416 1.188163 4.429895 1.020393005 0.867097252 0.9043499 6.031142  
0.386122 4.571819443 0.5318963 6.994013 3.235882 1.112681955 2.268526 1.93172  
2.77630478 2.447667 1.646149943 3.518985827 1.139715 1.961947791 3.106968  
1.974719 1.30488908 2.756625 2.549504 4.035010255 0.7110142 3.790278652  
3.812497886 1.260861 7.777837985 1.075803 2.770888 0.8323908 2.660308  
2.049503 6.088785547 0.3699066 0.6509942 1.013905 0.249076 1.70002  
2.820329 0.7069325 0.2574115 3.562691 1.551587 4.747852 2.559210914  
1.979822795 1.387691 2.333733527 3.144778974 0.7703971 1.029034688 2.7572  
0.6228578 0.825660806 4.708388803 7.36619914 8.330164761 0.2442169  
2.130663 0.3713864 3.340497 0.5529762 0.4765179 0.569344277 1.282785  
3.582759 2.768638821 7.477359 0.4048505 1.471790577 3.060221 0.1903183  
8.858655855 0.6778525 1.704749 2.460753343 2.066166 0.6042014 0.2960632  
1.888877398 1.182482 3.95408 1.218333523 1.384986 3.548240367 6.4198  
2.760059 0.644410655 2.117081 0.791104941 3.110541 3.443121 0.9406425  
0.8592321 7.788716 5.925151764 0.3254101 4.180421 0.3219252 2.774927  
0.2171657 1.277356 1.354389 0.5420652 0.613141975 0.723838713 6.497674  
7.881347 0.154261 0.5343012 0.962590043 2.87857 1.44569683 1.877985  
2.869491 1.839268726 0.709494663 0.6617332 0.8796028 7.075580156  
5.452141 1.328697 0.3585097 1.906451 3.22534 1.372989 6.243691 0.4796251  
5.01205 1.865476 4.434134 4.578051 0.2484622 2.090808504 1.502726 0.6488023  
5.798374617 5.106217 0.6185692 0.3855351 2.770809 0.4409022 0.958698456  
1.060595 1.601023 1.593953 1.290198 0.5065872 1.193484762 11.95167 3.189131  
1.614769 2.039710098 5.090178997 1.940816 0.4598124 6.159055 0.988110807  
2.978779 3.490686 2.191226892 1.082123 0.7827262 1.709771 0.1941363 1.01159  
2.184623 4.017991978 2.664989 4.142313052 0.6443898 4.312256 1.027218  
1.239872 0.7922142 1.127875 0.3489526 5.079942933 1.292544 2.036261  
2.302983159 0.3382987 2.468288 2.325618 1.42976 1.492798 1.399719 0.2566643  
0.7074267 1.314112177 0.6178002 1.106589497 0.8285241 1.279826 0.32837  
2.624807628 0.920777101 0.9512715 1.338883 1.828245 1.773133 0.9469449

1.598198095 0.8817647 2.335562 3.615108 3.141131224 0.4014013 2.042001  
3.860829183 0.9451257 1.208945581 4.469891 0.908283 1.37162383 1.593537  
1.682664 2.11614472 1.024178716 1.718182 1.502334 1.199482 2.129409 2.285402  
9.812962 2.235149 1.565982 0.5403294 2.542545 1.756716 0.594598238 0.7524458  
0.808481576 0.2366351 1.011659 1.467806246 5.664903 0.5668955 0.7902052  
6.447270997 1.865869 4.185331 2.209251288 2.766000021 1.6126 2.308129  
3.185785 4.119041039 2.49778746 10.391408975 2.927375 1.050376 0.1180555  
4.18614 1.836893 0.4687322 5.89427 5.317539 0.8004828 2.585173 0.7589127  
1.34320316 1.215216 0.5941071 0.7508325 0.5157524 3.177382 5.78066  
0.7529644 0.8018077 0.5102558 1.322339 3.115426797 0.3920757  
4.492627 0.4781951 1.991987 7.346610409 6.289318 3.809834 6.779579 0.6423707  
0.529624 0.8258407 0.777385 0.76501823 1.785844 0.3827179 0.802747139  
1.927151 1.032781 1.125371 2.175288 2.175542 1.261374952 5.063978125 2.486916  
0.5504219 1.737912 1.14460461 2.038158648 4.443505362 6.911772 0.8836042  
0.9720463 0.2741107 1.13322 1.212666 2.549489 6.854405156 8.472950602  
0.7375497 1.535512588 2.095989 1.718912373 4.631661 2.795001 0.7141242  
1.221133 0.8878696 0.8363491 6.385156 1.001018 0.5459831 4.577044589  
1.829113 2.256513 4.369627 1.747668 2.487148857 0.3649716 1.765226 0.4933894  
2.68874137 0.7564387 1.073709 1.97867 0.1932274 0.8541506 3.630232  
3.883325 1.325234251 1.151536514 3.129418067 0.8897675 0.871826485  
1.953359769 0.9394331 0.5685439 4.568550465 0.9456671 2.520141 1.0362  
6.699915516 0.8371559 0.1015816 1.235121 2.095316626 0.6663621  
0.7217548 3.544326 1.904199 0.3314701 1.532232 2.004532 2.791581 1.308127  
0.5754906 0.83315 1.750280521 0.0605119 0.1386849 0.2184589  
1.617072 1.23032 0.5063258 1.003472 0.543391445 3.632764725 0.24112531  
0.7866014 1.295319 0.8347374 1.049703 0.6556881 3.913900062 0.1654007  
0.5756805 1.568859 6.133818 5.487999 1.772172868 1.016193 1.15288 1.346312  
1.421825 0.3728589 6.267874 0.6852937 5.238303432 3.005203 1.112639  
1.422801276 1.267226 1.456624 1.210391 1.352774 0.7555071 0.454764302  
1.748474212 0.81689021 0.1578618 2.266976 1.199623 6.26035 3.599752  
3.044645 0.522025032 0.8103981 3.108324026 3.508771 1.151034 0.3492281  
1.487793 0.1558381 0.310236724 2.440546 0.7385965 1.023776 0.8956702  
4.423259 0.5634126 0.4412608 0.941667577 0.9862732 1.397070413  
1.434969 3.154675 0.810702379 0.9140149 2.958399 0.5433137 1.852915051  
1.02565 0.68939 0.7762679 1.022139263 2.827315 1.002379 7.508197 2.333981  
3.918008 2.299285 0.760261  
ADAMTS9-AS20.01967318 1.313323571 1.486007 1.084132575 0.621980952 2.437204522  
1.574402 0.866674267 1.478934 1.327621 0.27838467 0.4705659 3.223344  
1.285745 0.7944704 0.6354959 0.5532961 0.464809389 1.423727 0.5019069  
1.554199937 0.6394451 0.63548264 1.735132 1.216814 0.770157681 1.844763  
0.5767036 0.4108107 0.9801125 0.2612542 1.001499902 0.7603459  
0.438314829 2.295473 2.117758544 1.033143153 1.200374206 1.237074 1.530919  
1.806754392 2.151022 0.838665095 0.007385151 1.554040363 6.360715 0.9204618  
0.1263318 2.965516998 1.145989 1.475115 0.8362512 0.619429868 1.136913

0.652741788 1.181524 0.8900852 1.166561 1.633646 0.4055827 1.024163  
1.724999 1.727314186 0.8741553 0.9358611 1.068166 1.220768 1.314127  
2.450797 0.3868943 2.282165 1.518195182 0.5953221 0.7832826 0.954337619  
1.186313 0.060585288 1.427459 3.389306 0.02220755 1.400299 1.230731 1.412806  
1.666039906 1.091305197 0.540278 0.2811877 0.7931983 0.595580414  
1.313164 0.7158447 1.385341 1.671198376 2.060975 1.304892 0.645045816  
5.411096 0.467433112 0.52973624 0.9444016 0.630089786 0.5217981  
0.2551142 0.218517845 1.771707 1.178681 0.975067035 1.646405 2.912427053  
0.399179614 1.565831 0.353868721 1.210041 0.4729792 0.1258408 1.034587  
0.9098469 1.933054704 0.7952174 1.027795 0.7644941 2.045709 1.073655  
1.35091 1.06943 0.240164 0.4146965 1.733238 0.9564185 1.326518932  
1.306527128 0.9024568 0.454507057 1.345766552 1.906757 1.881887944  
0.7069152 0.550243 0.711493106 0.483614766 0.40842284 1.552361066  
0.1156849 0.9933083 3.031893 0.5081724 1.542997 1.772183 0.997837026  
0.7189314 1.275785 0.476517483 1.315879 2.560606 0.755833091 1.098617 2.58735  
0.262748305 1.833748 1.636031 0.583478581 1.463136 1.978781 1.037765 0.775406245  
2.800185 0.4147844 0.592942357 1.409303 2.141026531 0.7972632 0.6571933  
0.633242772 0.8988926 1.929227069 0.8696886 1.627443 0.7295182  
1.242925 0.3040627 1.00712936 1.21475 0.3527857 3.314334 1.597147  
0.003283109 0.4387727 1.965662 1.318214 1.857603144 0.147730357 0.6204114  
1.424888 2.3004 1.741903 1.528861237 0.5383363 1.120467676 1.172264  
0.7258672 0.608806229 1.86882295 0.3976621 1.169378 1.173231375  
0.3305977 2.296401 0.01625984 2.260703 1.332792 5.055031 0.1763727  
0.7262124 0.4044896 2.601658 1.538895 0.5065806 2.458841 2.878510843  
1.818097 0.9208535 0.154850802 0.4677833 0.5914208 1.912651 0.9215597  
2.018712 0.855513978 1.260524 2.073285 1.380638 0.0060016 1.946374 0.468336003  
0.3565395 0.4002822 0.7404996 1.204768055 0.585763895 4.331094  
1.857931 0.5609935 2.083886342 0.9176568 0.5084222 0.709863326  
1.983278 3.31068 0.8968237 0.6985183 1.589003 0.4997146 1.646371293  
1.151237 0.533615065 1.792993 1.71706 2.084056 2.010714 0.6202665 1.188469  
1.343804 0.058575163 3.886514 2.729941 0.388551982 1.200861 0.9575747  
1.776312 1.368027 0.3567498 3.269366 1.730591 3.721816 1.02455617 0.8889887  
0.930018824 2.476494 2.077619 2.075076 2.520559078 0.486730587 4.343158  
0.8703726 3.200641 1.022925 0.7129322 0.673503189 1.55967 24.65112  
0.861334 0.492753719 1.217722 0.8749481 0.512272277 2.05753 1.434731325  
0.2683996 2.672059 1.132990726 1.197671 1.315112 3.48711311 2.352497286  
0.3791014 1.202763 1.174161 1.308182 1.243825 0.6999924 1.552321 0.4220825  
0.5160694 0.88888292 0.6803912 1.050649824 0.0603775 1.551508789  
4.498044 1.061186 0.540636063 0.24775 0.563304 0.2236351 0.191190771  
0.9642076 0.6649502 0.894554286 3.663852124 0.0240154 0.7374119  
2.461182 0.656986679 1.420202162 0.732489632 1.189457 0.9990522 0.5532763  
0.4609723 0.7690191 1.671798 0.5704716 0.339182 1.27641 0.7143101  
0.9539178 2.383031894 0.8650235 0.8308079 1.998846 2.138645 15.92823  
4.214983 1.258669 1.812025 2.921694 1.289427 1.909290714 1.467839 0.3939332

2.111628 2.086811 0.518596169 0.4827233 0.9477333 2.030636 0.5910054  
2.155299 1.166785 1.450366 1.811163735 0.4511341 1.944072 0.791635822  
0.9112937 2.29244 1.510786 2.851734 1.191082 1.660776527 0.155270923  
1.110048 3.063208 0.1097867 0.540499457 1.806514575 0.517314932 0.37752  
1.046402 1.754165 0.9846152 1.142134 1.053177 1.068083 1.281104075 0.501919414  
0.4591885 1.80499685 15.78614 0.367809024 3.922023 0.5915672 1.843193  
2.101103 1.67997 0.9738399 0.5187074 0.6293403 0.7341355 0.972178561  
2.86006 1.477396 0.638941 1.013443 3.066310748 1.458096 0.03625359 1.345717  
0.40778451 1.258595 1.562279 0.4134476 1.457267 1.502671 1.366557 0.4057148  
1.423387412 1.115652633 1.011063106 0.7809141 0.598054645 1.263921727  
1.148921 1.569706 0.467815974 2.0006 0.8474812 0.5379516 0.970763662  
2.358257 0.8937834 1.170655 0.4233197 0.5958086 0.6027655 0.7731745  
0.4789222 1.32568 1.362737 0.8938234 1.10396 1.181732 0.3458355  
1.250395 0.789152377 0.03659274 0.07862391 2.661945 0.8974906 0.637979  
0.9970156 0.2990752 1.133668436 1.515375421 1.001250918 1.123778  
1.212061 1.166823 0.587168 1.718199 1.086582204 3.083149 1.755547 0.7336768  
0.995226 0.3885821 1.074401806 0.1041999 1.202617 1.825127 1.018191  
0.2050415 0.9719065 1.53924 3.075709374 0.9530288 0.7331919  
0.6359109 2.308269 1.688653 1.235597 1.703879 1.237832 1.885401661 3.000410157  
0.323338683 0.2362688 2.049357 2.814929 0.5844571 0.8137239 0.5312506  
2.041113013 1.729925 0.225559797 0.4565398 1.343918 0.08639391 2.65703  
0.2208712 1.421117561 1.127383 1.031269 1.866818 1.866484 0.4819446  
0.3992657 1.490487 1.277454938 0.850988 0.996443663 0.7665161 0.1741808  
1.275289216 2.184119 0.9379484 0.9528023 2.338580148 1.529704 2.30591  
2.62643 0.556297033 1.732122 1.153432 0.03752359 1.839237 1.661992 1.172126  
0.3611417  
AL139089.1 0.5350568 0.675940359 0.217767 1.00786598 1.15337596 0.264825257  
0.9525883 0.099924883 0.03274596 0.0581548 0.438994583 1.767287  
0.5523039 1.719774 1.210877 0.5781014 0.1807947 0.211415189 0.1776214  
0.3252987 0.239102959 0.4889735 2.390494814 0.8688142 1.273419  
0.551215329 0.4708867 0.2608331 1.584524 0.9416997 0.5411975  
0.176870508 0.4845666 1.740950245 0.2465231 0.401812009 1.277212185  
0.819705597 0.6542245 0.978631 0.767950257 1.007689 0.05043847 1.259914  
0.445248725 1.280083 1.315839 1.54975 0.135967576 0.1084222 0.352499  
2.285257 1.182571568 0.1488172 0.249768709 1.431723 0.3120419 1.243232  
0.1640906 0.5870016 0.1766666 1.825638 1.867371339 0.1473634  
0.1491055 0.6517677 0.1318045 0.6380642 0.5670695 0 0.2347463  
0.742365622 0.1308374 0.1177692 0.390758367 0.2213023 0.141236069  
0.6368775 0.2717833 1.180516 0.1150873 0.07736329 0.5390309  
0.162601897 2.06621123 0.3566865 0.1986373 2.490935 0.670832819  
0.2489535 0.3511728 0.221877 0.53971378 0.4807279 1.070342 0.54072376  
1.182347 2.0706621 0.083959073 0.2694245 0.107030166 0.04139469  
0.7851003 0.168837719 1.379146 0.1844471 0.106048346 0.6112697  
1.138095622 0.161236541 0.07712117 1.485735031 0.1628601 1.966

3.813671 0.1234421 0.3893499 1.069683396 3.558995 0.9707078 0.113696  
0.2437577 0.08578563 0.3549421 0.7978456 0.9401838 0.2771158  
0.9724366 2.613643 1.639894857 0.86767562 0.4114463 1.616365664  
0.989681972 0.1777162 0.513683221 0.7003951 0.109323 0.092586921  
1.583950285 0.291537052 0.546017177 0.6937709 0.3000462 0.4703555  
0.913069 0.9035591 0.1781172 1.121837631 0.2620077 0.6352134  
1.576212839 2.57342 0.4828762 0.33516184 0.8554916 0.1760688  
0.491960063 0.8584905 4.335622 0.37760332 0.9952272 1.369328 0.1422839  
1.026476333 0.5078286 1.10397 0.126110736 0.1314143 0.477465781  
2.632408 0.1688204 0.216786354 0.3030672 2.047198586 2.142079 1.842118  
0.1898651 0.2434143 0.1824193 1.454557007 0.1684174 0.1679208  
0.7039432 1.200232 0.6088063 0.07044521 1.667413 0.8509961 0.808567617  
0.182630075 0.862849 0.3462265 2.802329 0.7824168 0.482562988 0.8368719  
0.541753889 1.080665 1.142076 0.130262919 0.367201972 0.48233 0.3698843  
0.437974783 0.2392378 0.6864447 0.3101306 1.002109 0.4949294  
1.039247 0.6686527 0.0248232 0.1115805 0.5491197 4.172404 0.4354219  
0.1170193 0.453282518 1.025306 0.6162741 0.455477684 0.7178798  
0.247462 0.858002 1.30498 0.2683959 1.499263537 1.152722 0.1984318  
1.135529 0.1780659 1.022527 0.087282721 0.6665275 2.994018 0.2414333  
0.845756001 0.153348217 0.5199101 0.1546856 0.4814534 0.738690244  
0.6428513 0.7515537 0.469832633 1.138783 0.8972287 0.05001603  
1.770611 0.1328037 0.1917207 1.286439532 0.1775306 0.210784023  
0.4552366 2.133364 0.9906247 0.2592818 0.6452323 0.1897143  
0.298814 0.839989868 1.091688 1.397439 0.046484829 0.4248801 0.140522  
0.5334284 0.2689384 0.791919 0.5778981 0.4221286 1.504683 0.757852825  
0.1889403 0.182335375 0.7698091 0.6680897 0.2393453 0.611316143  
0.769056482 2.13345 0.4504139 0.9489192 0.04772002 0.06371239  
0.067206279 0.2719151 3.183121 0.2594473 1.143731835 0.1500394  
0.09038818 0.732314834 0.1004053 0.429296231 0.1270747 0.8258262  
0.451610701 0.5513988 0.2896149 0 0.800231747 0.31244 0.2050901  
0.4539576 0.5426933 1.227175 1.442264 0.9643035 3.55222 0.1069249  
1.069172769 0.1313283 0.25603705 1.36301 0.475967615 1.202942 0.2268883  
0.433932339 0.5955411 0.2773956 0.3827997 0.125130467 0.1141268  
0.1535987 0.076620082 0.191575748 0.1943266 0.4260323 0.3831307  
1.060190553 0.382567105 2.590244076 0.3237696 0.121151 0.3971508  
0.03477186 0.2091522 0.403677 0.2846258 0.3267351 1.162202 0.1070374  
0.2334226 0.451867319 0.3048761 0.6329017 0.5169238 0.1156696  
2.094179 0.4986342 0.2791524 0.2157891 0.6294027 0.370707 1.497230754  
0.8393527 0.4785992 0.643479 0.0988709 1.000129998 0.926441 4.641189  
1.524939 0.1543572 1.052828 0.05051296 0.1783093 0.343146639 0.155039  
0.1761845 0.276976791 0.06376851 0.2861255 0.4543036 0.2156852  
0.1698995 0.34718684 0.623844066 0.6461058 0.9585144 1.127542  
0.135902375 1.351724734 2.000967971 0.7500616 0.5449648 0.240952  
0.5901673 0.8259915 0.2083166 0.3183121 1.655035528 1.628792848

0.225563 1.11746105 2.467892 0.622741272 0.971545 1.096978 0.3931179  
2.695887 0.6078572 0.2181948 1.138716 0.1857947 0.1728699 1.530200988  
1.084157 0.2919669 0.2409815 0.3779571 1.107746819 0.2455604  
0.3361358 0.6066901 0.390752715 0.2762858 0.3243489 0.2139573  
0.09286239 0.5141964 0.3108629 0.6998519 3.526049846 2.126516661  
1.58506693 0.1779782 0.201637818 0 0.8282295 0.47816 0.669408484  
1.272528 0.09649772 0.1631689 1.057148458 0.06258396 0.1366924  
0.1017569 0.256322183 0.4910413 0.5358471 0.2194505 0.7182397  
0.1419217 1.206927 0.2271478 0.202687 2.04766 0.8873377 0.4076803  
0.103908056 0.6107047 0.4898777 0.5716031 0.7376265 0.2069461  
0.1277499 0.08267221 0.163891857 0.280226594 0.144208049 0.1323104  
1.284341 0.04320219 1.177103 0.6617406 0.698237338 0.2967599 0.9775463  
0.1407414 0.1743785 0.342758 0.121668802 1.263388 1.498475 0.2481716  
0.9734163 1.270015 2.008847 3.798418 0.443192803 0.1880895 0.3963209  
0.191457977 0.1497838 1.00395 0.3619449 0.4810918 0.8577911  
0.593950987 1.292121707 0.349758494 1.221446 0.426558 0.1323166 0.1230806  
1.287882 0.327191 0.369714895 0.1999259 0.371794518 0.1548048 1.31059  
1.473889 0.5590099 0.07863832 0.52183408 0.6081664 0.1242357  
0.2649299 0.4757568 0.1760982 1.06615 0.4241276 0.887002567 1.16532  
0.128764059 0.2145503 0.2076388 0.574165463 1.441331 1.838817 0.1949614  
0.723878277 0.1327074 1.082283 0.9227105 0.423210008 0.2566562  
0.2119609 0.0974151 0.1308625 0.5233466 0.5569221 0.3499868  
GAS6-DT 4.948254 1.837071212 0.3514171 1.542382974 0.679794591 0.501260058  
0.4669949 1.297692515 0.5233986 1.239365 0.178666397 0.1618354  
2.112576 0.7115 0.838681 0.814436 0.5508587 0.357412973 0.3871406  
0.2617777 1.245473737 0.7082851 0.470882219 0.5442914 0.1227479  
0.87603498 1.141422 0.495075 2.870095 0.3010352 7.848043 0.425660557  
0.4706238 0.261922663 1.182098 0.740081834 1.03174918 0.53649824  
0.5194918 0.6068038 1.210914815 1.021909 0.663426079 14.18688 0.766031576  
0.8423652 0.2852197 0.1260132 0.792331543 0.4765688 1.387423  
0.3338958 0.697196017 0.4212168 0.556605475 0.5200932 0.1722675  
0.5630209 0.3404544 1.294967 0.03781834 1.480836 0.142500268 1.777064  
0.1572279 0.2136422 0.4279259 0.4611054 0.3479858 0.1704056  
0.4820396 1.545961196 0.6698549 0.4902024 0.375344231 1.531738  
0.205223796 0.2465372 1.101103 3.716185 1.293405 0.5538689 0.6414231  
2.093610497 0.18212596 0.1362404 0.4181283 0.1450285 0.482177853  
1.437788 0.2034715 0.3948134 0.417414809 0.51025 0.4887979 0.09821268  
0.7171181 0.865900683 0.620660563 0.8488529 0.6147929 0.4652132  
0.1709363 0.45539477 0.5225885 0.1381936 0.402570823 0.4978071  
0.168434006 0.527142565 0.3852107 0.519474466 2.12405 0.2454982  
0.3729839 1.10984 0.3727446 1.011747653 0.4972515 0.3784247  
0.4472192 1.057738 0.5427523 0.1363763 0.2758943 11.53017 0.04844557  
0.7714379 0.4973266 0.518767968 0.94003618 0.6402501 1.01496029  
1.06537495 0.5104106 0.591246001 0.4538448 0.5733577 0.943418986



0.407216606 0.595139229 0.32085749 5.909249 0.2830866 0.1468355  
0.2689624 0.8406879 0.2313151 0.560344104 0.6697446 0.5532084  
0.334005608 0.2431822 2.399538 0.159799708 0.63734 1.70292 0.453651697  
1.192615 0.8020703 0.181354054 0.2682782 0.3206073 0.4548418  
0.113936068 0.1606476 0.3706261 2.110190535 0.2267558 0.642881469  
0.05555727 0.3689163 0.550434101 0.3557391 0.848716934 0.7378912  
0.85738 0.395147 0.5547199 0.2319321 0.287025517 0.5047344 0.6640054  
1.776086 0.8659462 6.361589 0.3659398 0.9878018 1.353259 1.00555284  
2.635287116 1.350412 0.4186868 0.4251028 0.3063086 1.122712301  
0.179146 0.541198813 0.315563 0.2580621 1.426001918 1.247207517 0.3428447  
0.3602677 0.589709008 0.2589087 0.3747656 1.273675 1.107864 0.1204362  
0.304863 0.4283705 1.401074 0.2538952 0.4408048 0.1727722 0.2738736  
1.127244 0.468432506 0.2702895 0.7695534 0.286854765 0.2390481 4.24749  
1.714246 0.2690057 0.2751767 0.191569785 0.5483528 0.2690243  
0.2835914 7.348812 0.1702465 0.488282433 0.2792251 0.1495475  
0.8667621 0.996331896 0.280850346 0.6280843 1.439912 0.3349544  
0.950089239 0.4344244 0.6234186 0.695934608 1.380059 0.7988845  
1.065915 0.17398 0.3233773 0.7554569 0.363186499 1.259176 0.37434321  
0.157004 0.3729561 1.4614 1.114896 1.485316 0.132664 0.1918979 6.387509516  
0.4066531 0.1642361 0.340539477 0.265278 0.7912217 0.3463732  
0.4856598 0.5981545 1.197375 0.9488163 0.9356289 0.525747456  
0.6228642 1.22950275 0.2519205 0.8898736 1.186304 0.22052687  
0.800279702 8.152085 0.4070998 0.5880782 0.2860268 1.042221 0.49234108  
0.697612 0.583645 0.3968716 0.844500854 1.326489 1.21899 0.531419503  
0.9779482 1.072140947 0.2820989 0.8249801 0.529608504 0.3366207  
1.006038 1.65938124 0.877132433 0.140454 1.0244 0.7222288 0.3361251  
0.317557 0.7684191 0.5275299 0.1804363 0.6729368 1.45970565  
0.2905004 1.438732785 11.18468 0.475479944 0.6980519 0.8281654  
0.568018413 0.05949309 0.6148409 0.5311215 0.770847265 0.6840594  
0.8780254 1.056273769 0.382758923 3.680334 0.4530536 0.1551641  
0.436648261 0.580087252 0.399709046 1.401564 0.4841077 0.2512711  
0.4110454 2.032396 0.7183129 0.2843341 0.5630406 0.8353614  
0.340832 0.9983168 1.168340646 1.038286 0.1497442 1.367271 0.6685456  
0.6101764 0.3735925 0.4596131 0.9546582 0.3143789 0.2499708  
0.536691171 0.9103635 0.6794178 2.05264 2.189393 0.268989882 0.3376795  
0.252191 0.5679254 0.6861858 1.100292 0.5718937 1.288449 0.154257774  
0.3549337 0.9883302 0.366618229 0.3185159 1.327079 0.6807572  
0.0769515 0.5875109 1.239600098 0.455418952 0.206873 0.4678851  
4.515977 0.362035017 2.211426 0.08230838 0.3663211 0.4206777 1.332475  
1.621297 0.8991967 0.4682322 0.4063154 0.650189807 0.450364679  
1.081593 0.558158055 1.01256 0.118495851 0.1739664 0.6821132 1.07633  
0.5129761 0.664817 3.051597 0.4653609 0.3944092 0.431732 0.363050375  
0.3951654 0.6125023 0.2648081 0.2622013 0.812300175 0.4212912  
1.567027 2.14411 0.795162202 1.096748 0.1914643 0.7243345 1.243081

0.4381299 1.308723 0.2796539 0.242926696 0.304653103 0.709004277  
0.3071019 0.796568922 0.954050799 0.8056077 0.6926216 0.382127208  
0.3331839 0.6197069 0.2815485 0.62766146 0.2500793 0.6713823  
1.770451 0.832193563 0.341244 0.6356665 0.5553716 0.4072319 0.759516  
0.4018968 0.3190994 0.04049587 0.4485883 0.7494351 1.438146  
1.332120445 4.873853 2.13228 1.737525 0.3500136 0.1447139 0.6593648  
0.8189927 0.528954251 0.824266237 0.954399451 0.8756582 0.733157  
1.855791 0.8378266 1.16298 0.567982144 2.649574 0.3500821 0.6678367  
0.5661496 0.1867673 0.990584751 0.2301464 0.3258046 0.4152615  
0.3939973 9.812951 0.4483252 0.2851378 0.421655916 0.4619129 2.23252  
1.217120614 0.8344767 0.3223677 3.047553 0.3442127 0.1428187  
1.123754603 0.491273794 0.224614372 8.718198 1.769048 0.8327402 0.211755  
0.9121151 0.3481724 0.258535262 0.6627108 0.127673419 0.3962808  
1.100958 9.069 0.3441531 0.602276 0.573429355 1.017635 0.5052986 2.71716  
1.053514 0.1407342 0.6508685 0.8685707 0.499306797 0.8326733  
0.225106225 0.05358263 0.4148521 0.530558891 0.8927097 0.5681235  
0.4138684 0.415133973 1.610743 0.7626141 0.4000113 0.325890135  
0.2488522 0.7314782 1.77948 0.1879222 0.1839518 0.3554468  
0.1882614  
AL136304.1 0.652217 0.952042427 0.8021871 0.739374156 1.679079737 0.427181678  
0.8447697 0.350914988 0.439079 0.4455869 0.560602119 0.2538957  
0.4732932 0.9317107 0.7731531 1.220941 0.7965265 1.339516667  
0.4330296 0.4154109 0.785154259 1.186409 2.708729147 0.9026341  
0.9414692 0.623919833 0.7162887 0.3497418 0.8004895 1.04623  
0.7022636 1.139596994 1.10868 0.843751184 0.7555521 1.322886113  
0.815508763 1.191158123 0.8354537 1.519063 0.548028758 1.023617 0.386463716  
1.783811 0.979236173 1.634683 1.85472 0.4142203 0.260448696 0.2492219  
1.080351 0.9529157 1.782484119 0.4275937 0.625648536 1.246589 0.8808545  
2.063911 0.3626757 0.983862 0.1450322 1.374907 1.788494161 0.6855315  
0.888579 0.8583262 0.176732 0.7021294 0.8379514 0.3459708 0.4996237  
1.268876408 0.7205377 0.488777 0.633350988 0.3835369 0.491892005 1.52494  
0.4338388 1.156945 0.3306781 0.7409549 0.9110513 0.726757007  
2.467848499 0.1607624 0.1630688 0.936724 0.658167711 0.2980473  
0.6457715 0.4250099 1.100531775 0.7136542 0.7908155 0.878833044  
0.8493038 1.475868267 0.836291745 0.2778937 0.23918824 0.1585848  
0.462731 0.840871549 1.305709 0.1766561 0.284392913 1.52726 1.73596227  
0.421161709 0.3840907 1.328112847 0.5199364 3.051688 0.8684463  
0.7487768 0.2175272 0.784723638 1.430209 2.13152 0.7622544 0.6420191  
0.3286483 0.5229991 0.5290233 0.8056843 0.2388694 0.5204666  
2.225105 2.251230906 0.912957344 1.151888 1.813477896 1.078619926 0.5106286  
1.069533486 0.5801605 0.2792139 0.354704315 3.524898032 0.242802277  
0.276857779 0.8043539 0.7024656 0.9291312 0.6726933 3.088265  
1.091799 1.257894512 0.8266278 0.717579 1.1436622 1.110234 0.4743381  
0.408551448 0.8887928 0.5518856 0.434935222 0.5652818 1.0546

0.361653474 0.8775392 1.885263 1.389993 1.029933452 1.361859 1.906676  
0.301959646 0.1830741 0.278355168 3.053867 0.4850685 0.622888099  
0.8417706 1.999940073 0.6602845 2.192018 0.6667659 0.5828314  
0.4129602 1.444713901 0.419389 0.2144372 2.454812 1.490138 0.1399417  
0.2698785 1.225591 0.9647534 1.390784281 0.272091304 4.958415 0.7330149  
1.51097 1.33671 0.827058373 0.916026 1.202835869 1.401255 1.145923 0.665390154  
0.703382952 0.604097 0.1062781 0.62009328 0.4582649 0.5504228  
0.396041 0.6398533 1.191137 0.9163535 0.6682529 0.1901974 0.237483  
0.6386233 1.822084 0.308911 0.5763932 1.407199472 1.145663 0.6886167  
0.189668891 0.491112 0.58175 0.6879853 0.8729168 1.190589 1.936842716  
2.03282 0.8688003 1.611207 0.04263612 0.7927955 0.267506963 0.7825224  
0.6690953 0.3179485 1.497794156 0.489569455 1.08854 0.3771135  
0.461117 0.636739381 0.9054375 1.388202 0.403436666 0.5006407 2.279093  
0.2554846 0.6672083 0.8267615 0.448855 1.642800975 0.7821462  
0.762659939 0.4360075 2.901416 1.412139 0.2807207 1.128481 0.4603088  
1.430961 0.499350389 1.382286 0.9447611 0.682660312 0.7557332 0.2447026  
0.6811954 0.3170197 0.9249617 0 0.6615787 0.7940897 1.532331759  
0.3619191 0.320161574 1.932215 0.8815984 0.4584708 1.008351366  
1.841429444 1.328167 1.807724 1.380086 1.828174 0.6712332 0.557851725  
0.3077803 2.392624 0.3106104 0.809658972 0.3736247 0.1731404  
0.582279467 0.2243831 0.692484873 0.4056903 1.107321 1.95580956  
1.114894 0.731279 0.90909688 0.936748034 0.5984853 0.3928543 0.4508857  
0.748469 1.217822 1.350646 0.8356124 0.8937918 0.327707 0.78507529  
0.3234369 0.490444252 0.5594731 0.683794339 0.6438375 0.635198  
1.519101255 0.2933412 0.2988883 0.5703139 1.118553288 0.3279185  
0.4576779 0.117413878 0.891206294 0.2481577 0.6844489 0.6347199  
1.460763014 0.418751532 1.613549906 0.4134582 0.7348799 0.1521501  
0.3996373 0.5098995 0.9907286 0.6905949 0.156467 0.6515769  
0.2306613 0.3353444 0.458238267 0.7963589 0.925204 0.8551539  
0.569745 4.262158 0.6686009 0.5545267 0.5019231 1.041229 0.674592  
1.450858647 0.643119 0.1930035 1.036502 0.4839947 1.068409993 0.9112898  
2.306269 0.8968141 0.1774046 1.334134 0.3225287 0.3643255 0.525843572  
0.04949673 0.4932474 0.23874964 0.8550493 1.487644 0.9427469  
0.177064 0.9513034 0.566518583 1.317548862 0.5394793 1.293584 0.4399654  
0.347098405 1.501018325 2.480108804 0.3831356 0.948992 1.219807 0.7418759  
1.17651 0.1330116 1.117845 1.46045441 1.448565068 1.382626 0.726968952  
3.967554 0.340821072 0.4564752 0.9005503 0.6414661 1.672161 1.184438  
0.5939383 0.8592737 0.6228137 0.6208799 0.952617756 1.066426  
0.4101303 0.09232102 0.4826564 1.354411841 0.4294738 0.3434001  
0.8551504 1.025715215 0.7520652 0.3953708 0.7286037 0.4980635  
0.9849538 0.3402653 1.161837 3.726466879 3.252393897 2.039257882  
0.3409208 0.421354254 0.335665752 0.7097458 0.5037589 0.915904114  
1.002543 0.396093 0.539865 1.41367204 1.258749 0.8291508 0.3248625  
1.227476073 0.6952259 1.186805 0.2522172 0.3346548 0.8932345

0.8669602 0.543883 0.2588341 3.956742 0.4017505 0.8053238 0.298557038  
1.169817 4.245011 1.001067 1.377615 0.3964096 0.5437945 0.6070479  
0.313938232 0.268389911 0.725112916 0.5068865 1.274022 0.3034338  
1.465597 0.8685255 0.993562533 0.6039778 1.165903 0.247127 0.2783547  
0.2984364 0.16314137 0.6548357 2.397595 0.21392 0.7394099 0.5105749  
1.255372 3.953406 0.768093055 0.3002411 0.5482829 0.900184183 0.2869139  
0.9157559 0.4457012 0.6475696 0.4868493 1.654873262 1.292955261  
0.765679554 0.1017263 0.8170807 0.6589832 0.1571756 0.810048  
0.4087442 1.062294761 1.009628 0.133533763 0.1482659 1.027007 0.4910026  
0.2988265 0.7029555 0.639733725 0.6407254 0.7479248 0.5751424  
0.303774 1.585403 1.452254 1.326961 0.94392873 2.077181 0.690620592 0.0587108  
0.3535435 0.659895474 1.398856 0.9441193 0.4668157 0.770335429  
0.2287834 1.628893 0.9671068 0.574222813 1.098938 0.1845525 0.2932296  
0.3133374 1.03961 0.414865 0.2062791  
AC005034.5 0.542781 1.58063559 1.366885 1.256266151 1.640961934 1.953886367  
0.9965382 2.230083231 0.6851355 0.8517308 1.462791915 0.9860401  
2.402372 2.326135 1.621431 0.7753507 1.134816 1.08883359 1.891949 1.323416  
2.501345338 1.602805 1.26800411 1.355646 0.8413716 1.625095914 2.578969  
0.873175 1.420826 2.20673 0.8401186 1.951234337 1.379958 0.658291466  
2.647742 1.865305549 1.319643809 1.62633982 1.754894 1.941656 1.890309268  
1.597244 1.829206299 0.5157561 1.345619359 2.040598 0.5713974 0.5278494  
1.16953512 1.724052 1.593053 1.36611 0.811234278 0.7784164 1.165765972  
1.81549 1.374479 1.456662 2.297621 0.665258 2.53464 1.273245 0.759704899  
1.893995 1.490522 1.747211 3.254101 1.221388 2.610223 1.091697 2.837777 1.290378013  
2.121546 2.299785 1.132025313 2.05054 0.510417123 2.06541 1.611162 0.229764  
3.070126 1.348877 2.255602 3.742286159 1.9326717 1.668169 0.8312075  
0.9592125 1.403566521 1.920742 2.14547 1.392683 1.347790019 1.860757 1.50363  
0.37711421 1.722821 1.209040152 1.335057357 1.474319 0.97039153 1.125918  
1.221454 0.9184627 1.293524 2.045344 3.461363411 1.445763 2.293015738  
2.054775071 1.807217 1.070728214 1.249409 2.37585 1.283376 1.162236 1.255883  
2.523782736 0.7290176 1.089798 1.516505 1.243145 1.585469 2.027968 0.6741453  
0.9835613 1.362535 1.525953 1.475616 1.315259019 3.3751391 1.854157  
1.014564285 2.391999957 1.82817 2.242990741 1.188177 1.563014 1.201047078  
1.267140233 2.121654231 1.008015805 1.451559 1.534571 2.337268 0.7837503  
1.186192 2.273288 1.202220533 1.70907 1.669821 1.598967375 1.115666 2.124241  
1.21125109 1.031481 1.574006 0.870959339 2.020723 0.5759563 1.39778053  
2.54502 0.9400812 1.071709 1.4658703 1.452106 1.363165 1.649114376  
1.224799 3.518180633 1.279963 1.810246 1.247335646 0.7926247 1.670487688  
1.236364 1.313937 0.6620831 1.368716 0.4857633 0.601152157 2.713291  
1.405346 1.208486 3.069263 0.8661772 1.12017 1.338682 1.526158 2.589406454  
0.594396883 0.240709 1.143791 0.7383341 1.946739 2.550705652 1.05058  
1.545679014 1.530555 0.7396186 0.931198171 1.19084545 0.9703527  
0.7738995 1.713201417 0.4588386 0.3340072 0.8291223 2.711715  
1.858641 2.450503 0.7299157 1.090676 2.101113 2.215754 0.9951084 1.113472

1.993669 2.518143042 2.2644 0.8596099 1.657364218 0.679477 1.412068  
1.878672 0.8667863 1.30045 0.875405898 1.531309 3.291735 1.055928 0.04657036  
1.426271 0.547858279 0.3598861 1.044051 2.083723 2.17020757 1.069488637  
1.897316 2.294936 0.9353804 2.434230057 2.571365 0.7019896 1.186402147  
1.445212 1.469151 1.360415 1.275356 2.188161 0.6239838 2.418525525 2.228657  
1.666068278 1.247295 1.651526 1.687048 1.60388 0.8217411 2.275758 0.8038299  
0.575729329 1.587264 1.777228 0.713232896 1.523941 1.229499 1.860131 1.731363  
0.6061874 1.298686 1.284668 0.9316133 1.233272658 1.423134 2.225391509  
1.99943 1.988021 2.234231 2.025148705 0.938628485 10.82463 1.480898 3.272233 0  
1.333038 1.593625282 1.551603 7.250086 2.205267 2.080870571 1.789365 2.231579  
1.156380214 1.680603 2.174603115 0.8567089 2.107984 1.150305293 1.410051  
1.514885 2.48245876 1.488270774 1.765018 1.103412 1.512651 2.316346 1.856087  
1.039399 1.801418 1.165221 0.6264056 1.379485252 1.020592 2.578055467  
0.4073989 1.671613732 1.776625 1.351105 0.782677281 0.8544244 1.378421  
0.4894524 1.309036535 1.512303 1.106943 1.090109746 2.805803607 0.03388205  
1.236426 2.339848 1.206394829 1.572283952 1.409951763 1.637086 1.478641  
2.936018 1.455046 1.193465 1.478056 0.9925255 2.42685 1.067551 2.519455  
2.197729 2.780678089 0.9858217 0.6969496 1.253611 1.832381 6.207263  
0.7302958 1.687294 2.225201 2.424262 2.055395 1.805862138 1.756156 1.31758  
2.172495 1.631936 1.166997181 0.5238836 1.015758 1.651271 1.647084 1.152237  
1.479618 1.790746 1.184629088 1.811145 1.9282 2.202143797 1.467634 0.9407407  
2.019872 1.869558 1.312528 1.129971474 0.93710482 2.183727 1.914317 0.5679382  
1.516507194 0.737785939 0.541792009 1.429839 2.004016 1.692463 0.926094  
2.127017 2.397206 1.590991 1.55630963 1.460520871 1.510207 1.588099557  
6.085563 1.861351133 3.566882 1.592573 2.954945 1.826459 1.118311 1.633873  
1.696633 0.4859169 0.6781714 1.760880428 1.103523 4.927725 1.042012  
1.493715 1.923206684 2.546561 0.468859 2.05972 0.938682309 1.095282 1.326407  
1.243493 1.360055 1.866899 1.99769 0.5369036 0.508790676 1.483085654  
2.128432869 1.286401 1.342350865 2.529810489 0.8208396 7.453293 0.914668683  
1.803615 1.499827 0.8069317 2.003180331 1.538578 1.382324 1.170969 0.759753252  
0.8487162 1.401424 1.836603 2.11198 3.139072 1.420438 2.673313 1.130872  
1.052276 0.9113993 1.625992 1.59429743 1.362946 1.366612 1.571821 0.9259903  
1.32783 1.900714 0.9225225 2.215705358 2.475535362 1.659475666 1.453356  
1.535539 2.078989 0.8004174 2.153734 1.544384548 1.979129 1.312076 1.398731  
1.581007 1.40169 2.087429337 0.8707519 0.959009 2.128897 1.158786 0.721714  
1.102931 0.7350136 2.384437058 1.475756 1.888761 1.165331423 2.43479  
1.800463 2.461187 1.76831 1.628555 3.27623179 1.654364399 0.261353871  
0.2592637 1.352237 1.993267 2.088761 1.689154 1.756079 1.160317668 1.330954  
0.291711096 2.874561 1.121774 0.8044645 1.360003 1.096886 1.834257989  
1.017961 1.596745 1.589011 1.327219 0.2947566 0.2478532 1.478986 1.973684947  
0.8465865 1.23928499 1.891785 0.2896249 1.561705418 1.648561 0.3966298  
1.988575 2.468159123 1.971389 1.253526 2.549801 0.922366233 2.274333 1.290125  
0.4949894 1.026751 2.18997 2.492306 0.957582  
AC106782.6 0.4940155 1.097898302 0.7655873 1.26590547 0.878548094

0.982069401 0.8398199 1.110005417 0.5612223 0.5906347 0.866938086  
0.7011333 1.605304 1.819423 1.75246 1.778339 1.824719 0.588411414 1.598971  
0.4129768 1.008215255 0.9311507 3.526361257 1.598396 1.871906 0.90653977  
0.6065966 0.5960443 0.3978995 1.470486 0.1662259 0.581769559  
1.307242 1.677614659 0.9389062 1.434692539 1.351217318 1.74935487  
0.9583367 2.313439 1.691802181 2.733033 0.544282313 1.09531 0.910692108  
1.81857 2.363913 2.539392 1.697381682 0.5368169 1.772134 2.338726 1.476699897  
1.369729 1.829360665 2.39595 0.5003961 2.525314 0.3605507 0.6054888  
1.009277 1.188566 1.827404 0.6013365 1.041118 1.124801 0.6023879 1.137506  
3.6407 0.7261032 0.5960354 1.826915399 0.6228833 0.4111572  
1.31651989 0.481629 1.14917309 2.577208 1.351397 0.4705226 0.3835306  
0.4910756 1.38876 0.653689269 2.870001582 1.238609 0.3782643 0.8730332  
0.623153581 0.5926018 0.3477433 0.5809644 1.293007591 0.9383348  
0.7570639 0.998495579 0.1206182 1.008714164 1.055227798 0.4341313  
0.441603958 0.9459334 1.111714 0.771641139 1.116934 0.7024842 0.686621618  
1.821974 1.886329278 1.423559478 2.291041 1.288894485 0.9304018 2.194669  
2.996359 0.5876758 0.9885836 1.386890041 1.184857 1.96123 0.4871495  
1.53762 0.8984872 0.7539053 1.314809 0.5182705 1.846987 1.143764  
2.686082 3.331036428 0.930879984 1.054733 1.539020042 0.682372656 1.269092  
2.59437072 1.009332 0.3816696 0.176312985 2.262233683 0.289655529  
0.856288426 0.6953399 0.8253223 1.763403 1.649588 2.53036 1.356752  
1.380786957 0.9685315 1.767928 0.773133517 1.501071 0.8959617 0.493191362  
1.877618 1.097304 1.225095859 0.4597933 0.698947 0.663755836 0.9024801  
2.689094 1.544419 0.713626357 1.386114 1.481939 0.450285527 2.070266 0.513916336  
2.506443 0.7233394 0.756846889 1.009977 3.352687528 1.7817 3.747116  
0.9641586 1.361628 0.8842411 0.75232079 0.288645 0.6928372 1.993589  
1.862339 0.6492349 0.2682972 1.624547 1.521332 1.319788102 0.154569725  
1.862203 0.6940189 1.976469 0.5234973 1.475145647 0.4553293 2.204001417  
1.393044 1.294555 0.475446932 1.188744664 0.4592497 0.2113108 0.543935224  
1.176914 0.6687972 1.148351 1.144987 0.6766613 1.068051 0.6920181  
0.4254366 0.2360915 1.120379 2.470102 0.7677523 0.7640212 1.518014091  
2.088075 0.7334806 0.18855755 1.009018 1.156683 1.709885 0.9072476  
1.076011 4.050177093 2.369341 0.5668095 1.721899 0 1.159044 0.897545946  
0.9826577 2.423137 1.091932 1.276301159 1.362762474 1.611731 0.5891347  
1.24427 1.090181281 1.116164 1.661193 0.370221027 1.279819 2.191452 0.5397238  
2.349184 0.5690196 0.8518841 1.952709463 1.014213 0.401395356 1.093952  
2.600037 1.886443 0.8586949 1.976627 0.7947992 1.300641 0.358528811  
3.241672 2.295884 0.590139434 1.040269 0.2432688 0.8465051 1.575811  
1.213795 0.5298653 1.059631 2.075927 1.60352974 1.043415 0.520831026  
1.112096 0.7916167 0.8063878 1.649180514 1.50519274 0 1.102785  
1.305073 2.453573 0.9706185 0.469262592 0.7296373 0.9974796 0.9572504  
0.994306612 0.771443 0.3442519 1.262984015 0.5098704 1.247774562  
0.5646386 1.383904 1.832175715 1.195864 1.22837 0.90377014 1.354558947  
0.5354807 0.9484844 1.953062 1.240139 1.295153 2.166682 1.727015 3.296252

0.7737438 1.153746006 0.5359029 0.396151076 0.7786729 0.744529421  
0.9432537 0.7976541 1.766649374 1.231295 0.3631675 1.052948 0.675142411  
0.6157722 0.6174948 0.962988722 1.771968764 0.8326249 1.125341  
0.8281885 1.381364644 3.148252944 2.125426553 1.490004 0.9612815 0  
0.2648638 1.050032 0.6245857 1.951243 0.5910906 1.295518 0.2547886  
0.9445753 0.658021401 0.7125234 1.776133 0.7382823 0.5664067 2.82479  
0.2848643 0.5512775 1.056668 1.19857 1.164795 2.280937477 2.466067  
0.7195223 1.113977 0.7949581 1.24527905 0.9059502 3.254233 1.248183  
0.3821245 1.912364 0.897789 0.6338338 2.450449019 0.3198436 0.6193987  
0.685679848 1.092908 2.023795 1.982587 0.7041062 1.393706 1.518188981  
1.157523169 1.640503 1.45194 1.292281 0.517596938 1.268389802 0.806916082  
0.7935222 1.006327 1.179885 3.055477 0.7663007 0.8595095 1.178646  
2.053903158 2.104728482 1.675202 0.923461971 1.76235 1.58117901 1.186863  
1.620019 0.9981508 2.151294 1.097668 1.29026 1.741333 0.7076165 0.2880462  
1.493402941 1.785562 0.4447933 1.529668 1.039628 2.019713751 0.6709329  
1.152184 0.8719382 1.570897145 0.9968781 1.37569 1.131773 0.6012477  
1.238378 0.6765432 1.999089 2.276805152 3.013595559 1.757001225 0.9859586  
1.570820181 1.401535635 2.573318 0.1821117 1.170691057 0.9184982  
0.5512809 0.5649492 1.139504437 1.072606 0.3036867 0.3552549  
1.098255447 1.341649 0.4464303 0.3900389 0.8502178 0.6949571  
1.675878 0.4325569 0.514635 1.881267 1.106021 1.115995 0.329786311 0.5685597  
3.998026 1.399503 0.9832618 0.8669911 1.162308 0.6559685 0.960303848  
0.533634627 0.720864208 0.9133486 1.484929 1.755089 1.513049 1.330159  
1.481611316 1.024278 2.002032 0.7817058 0.5534475 0.5340379 0.648741854  
1.103867 1.812838 1.016074 0.6391978 0.9853087 3.282826 3.010397 1.004726987  
0.7163564 0.7127842 0.828620061 0.8776393 0.8193511 1.255421  
2.773186 1.058743 1.645176739 1.248654227 1.236938869 0.1348403 1.723046  
0.604728 0.9114857 1.830231 1.191958 0.95046334 0.4845505 1.371763832  
0.03684928 1.436948 0.8948969 1.435865 0.499169 1.27197057 0.4632518  
2.095438 0.8408419 1.54017 0.8718923 1.308394 0.9422757 1.206511583  
1.294484 0.833696985 2.072021 0 1.230054185 3.549841 0.8302888 0.8353448  
1.276369575 0.5559715 1.656152 2.088646 1.276036035 1.609999 0.843967  
0.1855073 0.8099036 0.9966074 0.8543279 1.050986  
AL049840.4 4.093446 9.847147388 4.571497 9.616067899 6.212017501 7.08810153  
6.192672 8.208995492 2.480174 3.658877 4.476253158 6.232357 6.587485 9.732085  
4.716596 12.31406 6.716265 3.460587706 5.066721 6.105199 3.490515724 13.36387  
7.731194262 12.97665 5.344825 10.874006018 7.342768 1.379746 3.160955 5.864432  
5.310047 4.446049923 7.233397 9.204175544 8.338012 10.370828037 8.89067303  
7.306041319 6.110667 10.18306 5.847216818 9.489793 2.567013355 4.37944  
5.29339062 7.132867 7.432074 15.38174 4.831235887 3.988626 10.06904 13.90511  
8.040822125 6.977528 6.813973733 11.37065 2.191624 10.32296 2.3521 6.26313  
4.399549 14.18189 6.32962516 9.010013 3.844078 6.170597 2.155029 4.569917  
10.90787 2.798671 4.013746 19.977965115 4.050354 2.359741 7.010523112 5.663149  
1.836892149 3.502925 5.663549 6.700128 3.597364 3.069253 8.310076 4.43095183

10.432965456 3.12783 3.326221 5.199302 7.376417235 9.540086 3.107294 3.000879  
8.414176689 6.227308 4.522134 4.176198524 5.711146 12.852201175 6.298483329  
4.185881 3.238289405 4.42913 3.654444 7.632047827 9.452715 2.417031 5.023239492  
6.262458 7.72802634 9.233914203 2.725867 10.121684396 4.916594 14.20176  
13.72255 3.809048 10.0053 5.828016351 10.26288 8.909078 4.647375 4.523964  
4.950392 4.382069 6.695853 4.372504 2.548628 9.971584 10.52378 9.528982138  
11.41573362 5.498212 16.461902731 8.533845144 4.20186 9.343950948 6.190048  
4.183863 3.205722251 7.449000985 5.54690933 7.471746255 3.204565 3.707414  
4.576777 5.263376 15.01617 11.13507 7.71387782 4.243111 8.889855 5.11063293  
4.598915 9.109748 4.707049549 13.19603 8.197532 7.120075507 10.32094 5.901836  
3.247574793 6.514178 6.224816 3.780347 5.249608866 6.83784 9.551588 3.316529651  
2.613998 11.455415937 5.259695 5.378419 3.692184355 5.811435 12.773534705 7.84415  
15.48563 5.288012 5.779589 6.399806 4.576835994 4.575927 2.456178 21.41775  
10.79535 4.215852 2.913357 11.93434 12.54844 7.836120773 2.415175778 15.35254  
5.783548 28.1999 2.669374 8.915937614 3.85194 12.226810179 7.875128 6.505529  
5.272355494 14.016271316 13.18081 3.112775 10.118760135 5.896135 2.74446  
9.673256 7.919253 4.943192 7.317932 7.636739 4.028796 5.410484 9.78455 11.33181  
3.043897 6.350828 7.103077177 8.560016 12.65699 5.809153547 6.123539 6.03121  
10.36304 4.357979 5.349541 5.071993113 9.920746 2.862702 7.912844 0.8830567  
4.185479 4.113373099 7.289357 4.799289 2.612303 7.846505578 4.055880705 7.07901  
6.373564 6.945752 11.411671269 5.000784 10.0034 7.323467978 7.787974 4.900895  
4.409552 7.328185 1.856038 6.274461 12.12610469 6.637697 3.266156048 4.391385  
14.51661 11.07859 3.27977 13.4569 4.22705 6.568961 19.639883864 8.030407 10.739  
4.191372555 11.63892 4.484544 7.374928 8.20743 6.757307 3.885512 4.05993  
10.68763 9.212288242 4.247662 8.823087373 6.063487 9.477648 12.19598 6.859404322  
7.884567455 24.17395 5.775962 9.675752 25.98858 9.038361 2.962545585 5.601906  
23.10618 3.645479 6.99465014 6.674073 3.911992 5.049859636 4.828366 4.807956203  
3.140307 8.697142 6.845704476 8.37835 9.00522 4.84982448 9.567094511  
3.192783 4.931266 9.197011 9.212403 5.776909 11.34753 7.342262 4.161975 5.681787  
8.397818174 1.623964 2.789552867 5.711822 2.227561138 8.847344 4.574135  
8.202998343 2.086545 3.981042 4.755496 8.875622807 2.858448 6.627219 3.75825752  
6.942385199 4.789276 3.601813 2.776092 4.96416045 8.837219258 10.177600329  
4.3141 6.287231 1.94168 2.842632 3.657408 4.216116 4.151816 3.299582 10.15541  
3.49051 6.208834 4.313994046 8.196899 4.144831 10.57887 3.734761 28.48106  
6.534199 4.43741 7.671593 4.264925 3.69907 7.009411693 13.69474 3.331155  
9.212908 3.064063 13.850443948 5.779644 13.68084 5.628587 3.414511 15.90926  
1.639647 4.130136 6.332451766 3.153113 4.415475 5.144647509 4.62538 5.651193  
10.19522 2.907875 9.128691 3.540126121 9.365353267 4.04314 8.511637 8.924058  
2.940920702 7.842728209 4.103675156 5.250123 3.672907 9.890408 10.70918  
12.22182 3.610543 6.378017 11.245248601 11.049653791 3.525291 11.127684573  
20.98056 2.709478493 4.958534 6.620956 5.513829 15.52616 7.030586 5.122104  
8.047979 8.850878 4.104595 5.794857932 12.47031 2.059249 4.268434 3.660343  
9.010596356 5.686146 2.532417 12.4957 11.622470808 5.769028 2.676397 6.059045  
10.76219 7.309033 3.176666 9.451453 7.576756839 9.512706081 9.897734682



3.092822 8.087776277 3.117925085 10.29778 2.759296 9.805127036 3.405169  
5.651415 6.241609 7.961262727 3.705553 4.245301 4.791422 5.264323503 4.389045  
4.227601 5.171022 9.451625 3.363672 4.685493 4.795995 6.741655 13.51796 5.236894  
10.6295 4.059909413 3.817846 9.619363 8.069602 6.007995 2.305497 3.549483  
3.313005 1.818775228 2.245959138 3.727449098 4.632801 8.740479 3.774198  
9.941331 10.53377 8.130523031 11.66194 9.667891 5.343965 4.088005 4.907383  
2.779179475 4.931858 15.21734 4.520104 8.19182 6.427793 12.94891 11.00719  
6.59675741 4.99359 13.87042 8.432757037 4.62649 4.023228 12.85209 5.768148  
2.578133 10.970549699 12.404125837 7.268409071 1.064091 9.386094 5.551667  
3.025163 6.840325 3.26656 6.51160928 4.96005 11.733188598 1.954148 8.665892  
4.031801 5.141984 4.85308 9.184537183 11.55216 4.288726 6.539946 10.52414  
3.789585 12.13386 8.039336 7.955471908 12.62819 5.49549445 2.78203 2.21891  
7.817340661 13.97789 4.580855 3.632989 4.351302837 3.908814 8.527128 10.56975  
10.027428867 2.105448 6.764405 1.739984 1.455261 4.078002 5.560923 3.090975  
AC015871.3 4.313951 3.343475315 1.011302 2.792646237 1.004676671 1.719000042  
1.064985 2.025235636 0.6778024 0.5015562 1.570534454 1.886194 1.51675  
3.498301 5.618446 2.441782 0.8497988 1.23426824 1.295149 1.153388 1.274110434  
2.024233 2.918297533 3.848146 2.485538 1.253316185 2.144055 0.7198577  
11.24044 2.988782 3.0038 1.234203555 2.281117 2.170818741 2.175749 3.725335802  
1.76109122 2.967993336 3.132234 3.623468 2.357076036 3.13396 0.681510502  
3.685037 1.329794647 2.024014 1.712975 1.258874 1.387639013 1.299772 1.848398  
2.90275 2.867449459 1.935908 1.582457657 2.563125 1.133139 2.165895 0.4681046  
6.454811 3.471771 6.708538 2.583534264 1.261858 0.5501055 1.115451 1.347047  
2.710514 3.681993 0.5798143 2.114551 2.314762334 0.6911498 2.200686  
1.484138646 1.4451 1.932334979 2.100978 1.556153 2.888665 1.054606 0.6560996  
3.014931 0.849207168 3.459184968 0.7509653 0.4344053 4.777678 2.786965507  
1.610325 0.8601481 0.9926688 2.582642591 6.789138 1.905577 0.953892282  
1.465841 1.640483715 0.847203115 1.188638 0.53077211 0.3927095 0.9201751  
0.32035109 3.766576 1.805518 0.749983662 2.148871 3.580842901 0.973409456  
1.064211 2.826138322 1.966422 2.360652 2.438075 0.8960605 1.678974 2.669502636  
1.244954 3.011832 0.7599426 0.6241171 1.257759 1.77785 2.011375 3.904939  
1.989663 2.713371 3.649555 4.891216693 4.326595123 1.330695 1.593182812  
1.846908757 0.8876968 2.870039421 1.591769 0.8485708 0.399258063  
2.77233539 0.595794477 2.105256539 3.637295 2.098952 4.26575 1.706199 2.95666  
3.364217 1.852464325 1.847626 2.303737 3.192542389 2.299427 1.729897 0.913168115  
3.332691 1.401167 0.938336033 3.725164 3.452384 0.569912132 3.365214 2.278916  
1.202585 4.025937851 2.627861 2.232017 0.754551882 0.5512364 1.772489452  
1.742711 1.182994 3.038220958 1.92768 4.502297642 3.440055 4.525487 0.6549967  
1.193992 0.2717476 1.618438002 1.445253 0.3741269 3.658263 3.316283  
5.618197 0.376684 3.402854 2.666156 2.625733731 3.211440692 2.207688 1.186554  
2.703313 1.823772 2.09188511 1.206371 1.975133041 1.828192 3.353636 0.753649626  
1.615136492 1.271956 1.100573 1.683368455 1.22079 1.142745 2.905045 2.863611  
1.477565 4.389019 3.547834 0.5245149 0.2459278 3.594198 4.418872 1.147452  
1.146201 2.50062711 6.902258 1.804905 0.426985695 1.164565 3.026735 2.8911

4.251815 4.209246 2.961964185 3.550591 1.295756 1.75918 0.4799157 1.952731  
0.82051934 0.7231943 3.023316 2.056214 2.608029393 0.617190966 3.269124  
1.109717 2.165126 2.166084175 3.758691 3.941152 1.641788072 3.928576 2.186869  
1.071219 2.31563 0.8447071 1.129889 2.942560667 1.714847 1.191739242  
1.383514 4.397409 3.407524 1.545879 1.125059 2.481557 1.463437 1.979745524  
5.170418 4.312803 0.848589708 1.877994 0.6224926 1.702205 1.418439 1.365981  
0.812221 1.423163 7.355922 2.242246628 0.8229057 0.864903535 5.219801  
2.452026 1.460842 2.511663979 1.483152013 11.82196 1.794313 2.773452 2.098963  
0.8104943 0.618262097 1.06064 9.747493 0.4545133 1.522505168 1.481648  
0.5690737 0.631585106 0.6278104 1.062023254 0.7062828 2.706489  
2.184540733 3.632704 2.24233 6.85602188 2.904423607 0.8353383 1.1055  
2.363596 2.34023 3.124126 2.715806 2.118763 1.544788 0.7746263 1.821163922  
0.8980226 1.20760509 2.527386 0.615747578 2.532666 1.339654 1.290500178  
1.196012 0.9719121 0.2842921 0.818384244 0.6315843 0.8831416  
0.231283528 2.12431565 4.280707 1.386758 1.786115 2.197676126 2.262480636  
4.086506037 1.198384 0.6269205 1.347256 0.5048148 1.541458 1.120612  
0.6546015 1.162395 2.579195 0.559656 1.283386 2.131959788 1.488004 0.5386641  
2.872506 1.688782 10.55454 1.526668 1.194858 0.9704169 2.819007 2.293965  
5.036019409 2.812868 1.433826 2.718085 0.9048225 2.902854097 0.6694402  
6.439643 6.616297 0.911909 4.274641 0.5953872 1.419929 1.886661501 0.9304226  
0.9350793 1.719926643 1.319932 2.538196 1.828467 0.717497 1.583649 0.876114022  
1.02088591 2.464689 4.565478 4.583116 0.761858739 1.976783378 2.456634975  
1.128465 1.175012 1.877704 1.137274 3.077832 0.8309401 0.8769655 3.376007973  
1.918992648 2.314989 1.872956964 9.596958 1.572886986 2.102678 2.143181  
1.531979 4.22941 3.701362 2.416655 3.4745 1.211805 1.984784 1.930093738  
3.992836 2.736302 1.274719 2.200292 3.597907296 1.657437 2.386847 2.068279  
1.485317338 1.084813 1.252449 0.8918829 0.9610703 3.117325 1.503296  
1.116637 3.486712576 3.703572546 3.4278052 0.8651667 0.916940903  
0.800995577 1.757571 2.134114 3.841021881 3.164141 1.081918 0.6844356  
2.425566985 0.8838496 1.994312 0.6728289 0.681617481 1.887331 1.595832  
0.7318251 1.146812 1.416348 4.315458 1.499888 0.4778071 3.353861 9.781729  
1.834933 1.030578577 2.773966 1.257426 1.507108 1.661984 0.8329101 1.799573  
1.901351 1.652690992 0.899592228 1.609066199 1.904229 2.1758 1.502809 1.42127  
2.377993 3.449716855 1.199722 3.555274 0.966002 1.05275 0.6180972 1.448079371  
11.16529 2.980031 1.760443 1.80208 5.747073 6.721236 1.79893 3.267171305  
3.758046 2.459112 0.652986325 1.341496 1.546173 1.755897 3.437089 3.60996  
2.910529393 2.902405579 2.100771897 1.312978 1.945332 1.437867 1.851744 2.90946  
1.226895 1.761705372 1.379409 0.561144977 0.5173568 2.132192 3.527918  
2.416197 0.3786708 2.709336693 2.019376 1.247499 2.932273 1.96952 0.6075037  
1.266868 2.164251 1.84570362 1.814638 1.998946695 0.4824231 0.2288221  
2.605932868 7.80652 1.78208 0.9668308 4.849955998 1.333384 3.608651  
5.360334 1.247075046 0.8007777 1.803129 0.7921478 0.9028994 1.487818  
2.341548 2.246432  
AC053527.1 0.5077181 0.594241256 0.2384311 0.946195038 0.426833293

|             |             |             |             |             |             |           |
|-------------|-------------|-------------|-------------|-------------|-------------|-----------|
| 0.396780062 | 0.2008702   | 0.402981737 | 0.4660922   | 0.2207336   | 0.16199719  |           |
| 0.3982846   | 0.4137505   | 0.3214353   | 0.7813248   | 0.4852676   | 0.1544013   |           |
| 0.324067078 | 0.2298353   | 0.2572313   | 0.607730411 | 0.4639894   | 0.91053596  |           |
| 0.4191978   | 0.317988    | 0.213975426 | 0.5716754   | 0.1485035   | 0.5452482   |           |
| 0.5897652   | 0.521828    | 0.480613623 | 0.4406491   | 0.447830399 | 0.2807124   |           |
| 0.893628443 | 0.516202275 | 0.68394766  | 0.9550723   | 0.7445034   | 0.428654072 |           |
| 0.5650278   | 0.502543876 | 0.6237596   | 0.445970945 | 1.012231    | 0.2827033   |           |
| 0.2051953   | 0.30104743  | 0.1851883   | 1.043603    | 0.8850987   | 0.303531891 |           |
| 0.4236403   | 0.218775512 | 0.9262974   | 0.4441472   | 0.5190719   | 0.2694919   |           |
| 0.4873828   | 0.2155369   | 0.4219843   | 0.369157959 | 0.2397153   | 0.2122305   |           |
| 0.3768775   | 0.2814075   | 0.5603748   | 0.8071427   | 0.257079    | 0.3341279   |           |
| 0.406404538 | 0.581964    | 0.2235037   | 0.492013273 | 0.1799956   | 0.109652422 |           |
| 0.5212401   | 0.451319    | 0.1563066   | 0.3276207   | 0.1468208   | 0.6544053   |           |
| 0.102862514 | 0.795788524 | 0.1493213   | 0.3635124   | 0.6090416   | 0.302752572 |           |
| 0.5315249   | 0.2999067   | 0.2565958   | 0.49561661  | 0.3763362   | 0.7399758   |           |
| 0.093290098 | 0.8113995   | 0.274166769 | 0.358511369 | 0.6489788   | 0.152342208 |           |
| 0.5008154   | 0.4011462   | 0.048063292 | 0.2481977   | 0.4463082   | 0.060377891 |           |
| 0.5863416   | 0.719963167 | 0.18777049  | 0.3732214   | 0.822395911 | 0.7469373   |           |
| 0.3618518   | 0.3416361   | 0.2635533   | 0.4618201   | 0.712679262 | 1.381561    |           |
| 0.4212391   | 0.1820588   | 0.9324401   | 0.5901676   | 0.2720359   | 0.2839049   |           |
| 0.6338926   | 0.3549914   | 0.5292243   | 0.8857496   | 0.350123537 | 0.365285459 |           |
| 0.3603909   | 0.262933309 | 0.291449259 | 0.5480664   | 0.572208222 | 0.4310974   |           |
| 0.2852772   | 0.131784304 | 0.961489787 | 0.162376238 | 0.320014361 | 0.5457149   |           |
| 0.9253249   | 0.9623834   | 0.1999421   | 0.9078267   | 0.9887456   | 0.798388095 |           |
| 0.5264904   | 0.5563913   | 0.373919104 | 0.7589787   | 0.4934501   | 0.260211913 |           |
| 0.2683003   | 0.6606962   | 0.215456962 | 0.3436704   | 0.7509854   | 0.165373717 |           |
| 0.4272178   | 0.6090759   | 0.6480666   | 0.208720422 | 0.5300693   | 0.3348765   |           |
| 0.336563781 | 0.6291669   | 0.679604578 | 0.3694085   | 0.4805837   | 0.539987907 |           |
| 0.4529416   | 0.641057076 | 0.5957708   | 0.9534517   | 0.4504098   | 0.3897738   |           |
| 0.1180217   | 0.460078859 | 0.3356054   | 0.3784346   | 0.8991975   | 0.5694532   |           |
| 0.3119577   | 0.2005375   | 0.8003075   | 0.296638    | 0.563696774 | 0.288831019 |           |
| 0.4912571   | 0.7521747   | 0.3840986   | 0.6320767   | 0.704934983 | 0.2382336   |           |
| 0.403079992 | 0.2839703   | 0.2322261   | 0.293566979 | 0.418127793 | 0.1584296   |           |
| 0.05264776  | 0.514978284 | 0.1418837   | 0.4998893   | 0.7111875   | 0.3613443   |           |
| 0.3431992   | 0.9861468   | 0.2896576   | 0.494652    | 0.1411724   | 0.7257656   |           |
| 0.4307954   | 0.5968069   | 0.3093264   | 0.467201589 | 1.033725    | 0.4751384   |           |
| 0.197311025 | 0.09731426  | 0.6884435   | 0.7668274   | 0.7076013   | 0.4021298   |           |
| 0.645159237 | 0.6250422   | 0.4034848   | 1.077509    | 0.2217701   | 0.7970164   |           |
| 0.099387624 | 0.2448276   | 0.3906428   | 0.4725132   | 0.658690289 | 0.21826936  |           |
| 1.118632    | 0.3802988   | 0.0489486   | 0.446853679 | 0.8880953   | 0.3056371   |           |
| 0.368959934 | 0.6377295   | 0.805114    | 0.04746047  | 0.3924922   | 0.2362839   |           |
| 0.4244911   | 0.769577442 | 0.581186    | 0.333356727 | 0.3856932   | 1.214616    | 0.5902381 |
| 0.1444112   | 0.8784661   | 0.6840793   | 0.6987387   | 0.803941977 | 1.02713     |           |
| 0.9360261   | 0.176438768 | 0.6047563   | 0.2909281   | 0.2783951   | 0.3975184   |           |

0.4948613 1.279531 0.60084 1.070851 0.779057952 0.6185382 0.389292679  
0.9445808 0.7818763 0.1834398 0.459230801 0.364880813 3.112579 0.2137  
0.7253498 0.1358453 0.181371 0.318861907 0.5277716 6.824754 0.2308039  
0.176949943 0.4271196 0.05146188 0.196669044 0.4287378 0.514561753  
0.4622303 1.786678 0.586907591 0.457822 0.637076 0.6755187 0.696065327  
0.3557711 0.5004284 0.5982815 0.3707744 0.2314916 0.7299046  
0.4084967 0.08569626 0.2130694 0.659453277 0.1602232 0.318878261  
0.1108601 0.314540643 0.5035932 0.4223103 0.38336333 0.3632863  
0.1727395 0.1513503 0.237473878 0.1624433 0.2186259 0.218115561  
0.623270421 0.1843975 0.449907 0.4126837 0.582432766 0.894584706  
0.56951245 0.2688233 0.3736228 0.1507434 0.1814736 0.5142062  
0.1795552 0.2700828 0.5813262 0.2017352 0.2285287 0.166122  
0.491834974 0.7100964 0.5926615 0.6354355 0.5644773 7.327716  
2.129205 0.2943212 0.1096947 1.099471 0.2638243 0.676936017 1.058162  
0.250975 0.6244778 0.484732 0.629643886 0.2494756 0.8292141 1.142386  
0.2856172 0.5763659 0.3594901 0.4229965 0.463999378 0.220676  
0.3279347 0.256254075 0.3328065 0.8726977 0.5927502 0.3289255  
0.4836554 0.494171049 0.227680316 0.5659321 0.6821544 0.3715036  
0.322396146 1.003819701 0.435590709 0.4270424 0.6581525 0.6124302  
0.4987613 0.3316024 0.3212182 0.302048 0.555841096 0.248395155  
0.1605284 0.450154741 8.154467 0.295461187 0.2870078 0.1593257  
0.3937555 0.9867115 0.5370196 0.5557554 0.3929211 0.2975088  
0.1537848 0.353928787 0.7924247 0.2770489 0.4116035 0.2689841  
0.570302952 0.6382544 0.3508571 0.537674 0.597379455 0.6209265  
0.335756 0.4060503 0.2114822 0.4305208 0.4740741 0.4648651  
0.721096275 0.281562213 1.178568667 0.3224157 0.365276206 0.299306046  
0.9617071 0.3062667 0.447236265 0.379781 0.4120523 0.2744746  
0.851717185 0.4008571 0.1621351 0.2413942 0.212822251 0.4558222  
0.4528544 0.2498852 0.3315606 0.6060161 0.3221042 0.2626915  
0.2884961 1.099349 0.5051996 0.5984085 0.295796657 0.6567676  
1.029305 0.4881574 0.6824391 0.09818612 0.5455013 0.2157322  
0.663941463 0.443180745 0.307889447 0.3295687 0.6202401 0.5329321  
0.7120614 0.5407166 0.283954705 0.3431963 0.9451006 0.450732  
0.248203 0.4878672 0.346356443 0.5923655 0.6273136 0.6534883  
0.5972067 0.3124394 1.784533 1.500071 0.270352231 0.4015779 0.250714  
0.222965328 0.2787946 0.6804668 0.6255722 1.369532 0.4748114  
0.819786365 0.878400638 0.35559388 0.4535358 0.8095262 0.4520011  
0.4671673 0.519839 0.1214895 0.657795661 0.4915232 0.231523503  
0.02754282 0.7348696 0.7296943 0.4440955 0.1305855 0.445653922  
0.7790745 0.3536637 0.3268113 0.7223169 0.1754555 0.4721151  
0.8049137 0.641280966 0.2764445 0.549831932 0.3490079 0.1641913  
0.837673883 0.8479657 0.6745602 0.4509371 0.267124587 0.2077791  
0.8527637 0.9664252 0.225892203 0.1934013 0.329123 0.2376969  
0.1862642 0.4138386 0.5504856 0.2490782

OLMALINC 11.60075 2.211141862 1.197249 1.999810809 1.269572597 1.262549179  
2.184493 1.120286813 3.454308 2.882094 1.255280907 2.437294 0.8221487  
3.074053 4.64652 2.113209 1.091784 0.919917128 2.203257 1.429797 2.003961845  
0.7288599 3.345776776 0.9624212 1.827278 1.857780896 1.879144 1.046758  
4.578678 1.418087 11.85035 2.35372472 2.53625 2.966225392 1.940971 2.356397665  
2.404612427 2.392917855 1.570806 2.663393 2.169693668 1.966557 1.690014969  
25.53749 1.714359829 0.5513788 3.833561 3.788089 1.582113238 1.152012  
2.301123 6.268509 2.12654047 2.531089 2.474678217 3.349582 1.983538 2.38217  
1.119238 1.476996 0.8970848 1.568479 4.926616288 1.520714 3.045723 2.545568  
0.9369954 2.521721 2.811372 1.465 2.821219 1.8813774 1.1564 1.012765  
2.131095956 1.397624 1.413316991 3.103561 0.9752841 10.4195 2.177342  
1.537561 1.526966 1.097929315 2.657149452 2.301515 1.822075 3.346753 1.375774586  
1.754343 1.954233 1.468136 2.375550057 1.566347 2.553878 1.853733854 0.58101  
2.723934445 1.521038237 2.241684 1.097678059 1.993468 4.524098 1.793942133  
2.102397 1.670761 1.264598471 2.666419 3.407371741 1.529422907 1.296942  
2.902357077 2.116351 1.405657 2.741913 2.146687 1.798129 2.018085391 5.526645  
2.321059 1.493764 1.088865 1.557408 2.081858 1.348769 2.468106 1.805842 1.721699  
2.663846 2.05790412 1.069617957 1.372966 1.641529446 2.204339704 2.39431  
2.816927318 2.87951 0.501403 2.597406119 2.234603693 1.908781867 2.719100573  
8.492142 2.427363 4.477429 3.158696 2.586687 2.382693 2.400064948 1.472649  
2.396679 1.670383425 7.647028 1.149931 2.497947661 2.721068 2.355291 1.048621263  
2.327585 3.498297 2.42015456 2.300387 2.764001 3.69793 2.497163168 3.228424  
2.621565 1.921971371 6.118557 1.75348012 3.018343 2.371245 0.80094527 1.43054  
1.862220431 3.811233 3.562985 2.606365 1.517612 1.628941 3.019899995 0.8625531  
1.567058 2.428342 2.132256 5.519351 1.383913 1.608047 4.234931 2.440761734  
5.041239171 2.792167 2.319237 0.920317 1.834664 3.033504104 2.257263 2.418837189  
3.666466 1.247157 0.966695366 1.950805457 0.900469 3.831151 2.627378424  
2.087821 2.043977 1.270936 1.68524 2.735596 1.88514 1.661147 2.495213 1.686902  
2.20369 2.809326 3.630412 1.079793 2.616611463 0.6422394 2.08062 1.369972975  
1.39801 4.483986 2.150617 1.9159 0.5345047 2.711865175 3.223882 2.388999  
2.515608 8.464633 3.768553 1.814768915 1.495622 2.822663 1.972411 2.653093969  
2.246722699 2.583246 1.182426 1.005499 1.69397802 2.02341 1.379807 1.746177733  
2.347477 3.518694 2.268465 2.884436 2.074732 1.538801 1.382407794 1.390981  
1.324802235 2.551895 3.767047 1.426428 0.9392795 2.391042 1.372844 1.680484  
2.131085827 2.913654 2.283039 3.701384144 3.758179 1.367111 2.018392 1.889738  
2.0006 0.2781382 2.002069 1.537498 2.003437862 4.628889 1.324093616  
2.120438 2.167603 1.625502 1.713410594 0.906301861 6.727142 1.532951 2.129065 0  
1.692399 2.277531481 2.21553 2.063597 1.828291 1.90059915 0.9404668 1.12622  
1.96453178 1.579779 1.856675865 1.063107 3.497217 1.808621076 2.253815  
2.455344 8.16262801 1.928560602 1.170272 1.545325 1.156693 1.269405 1.689638  
2.41932 2.685221 8.151769 2.345767 1.872938382 1.72811 1.174297722 19.81086  
2.819702307 1.142659 1.64763 1.652783694 1.768914 0.8813033 1.389919  
1.155776802 1.272239 0.8675427 1.405652615 1.715459602 7.792394 1.365678  
1.46038 2.644515831 3.953116649 2.712436848 1.000278 2.075976 0.4958547

1.160652 2.012999 1.764653 1.689791 0.886642 1.180914 1.18639 1.159793 1.534027396  
1.970325 1.502308 2.388799 1.199966 2.28448 0.9528976 1.91652 1.372624  
5.877309 2.011932 2.288984688 2.456436 1.318964 1.906032 1.184048 1.381990687  
1.646033 1.759033 2.152404 1.174016 1.405284 2.490501 1.890037 3.088622407  
1.298702 2.574394 0.788667253 1.137384 2.296519 2.047461 3.285645 2.11292  
1.267982775 2.145915984 1.614631 4.337883 7.501723 0.857048007 2.395980643  
3.715911996 1.528938 2.171236 3.519253 2.629227 1.756568 2.368673 1.960075  
2.921146199 2.545701428 1.758702 2.425588794 2.139124 1.405413745 2.809478  
2.609732 1.307739 2.198136 2.539551 3.612307 2.657483 2.094833 1.891294 1.703368333  
2.822182 0.6844226 1.240332 0.9469918 2.819558751 2.652394 1.952777  
2.380039 2.01341723 1.934097 2.197599 1.05399 1.128655 1.705164 1.943437  
2.416286 3.191027686 2.211466439 3.05621329 1.644939 1.415222844 1.366295141  
4.781599 1.087388 1.561206956 0.7609247 1.765054 1.780199 2.713965146  
1.746144 2.411943 1.076007 0.947015514 2.929401 2.784033 1.487377 2.693199  
1.782267 3.334751 0.7759234 1.797248 1.359291 2.189015 1.577644 1.237752278  
4.398542 1.95257 1.248391 1.853644 2.014297 3.005536 1.421891 1.455174658  
1.428046147 1.715509065 2.161843 1.910922 1.442049 3.351698 2.149814 1.372466292  
0.9286471 2.185332 1.79306 1.033044 1.708996 1.469469144 2.209843 2.189819  
2.494606 4.355465 9.522299 3.740922 2.257372 0.863080568 1.246065 0.7321295  
1.077680319 1.299085 1.260771 2.149156 2.971814 2.51352 1.933023551 2.58719935  
1.279496758 6.962009 2.312087 2.33136 1.683051 2.60075 2.457571 2.020678133  
2.174277 2.104871088 0.9984408 2.178206 12.27069 2.161397 2.164018 1.667373416  
1.778189 1.912898 2.085894 1.321339 3.607562 1.249623 1.842569 1.65202593  
1.626906 1.146686599 7.374304 1.260945 1.486758816 3.187766 2.311274 3.129623  
2.326064719 1.024568 3.567749 2.315597 1.12552544 3.364074 1.745442 4.499795  
0.9127931 3.756019 2.128573 1.327371  
AC022400.5 0.07957297 0.89437677 0.2055268 0.789306723 0.660385145  
0.524435392 0.3462989 0.49040316 0.05356932 0.2061276 0.398974383  
0.6745937 0.618196 1.193559 0.5678524 0.7396013 0.2366105 0.279344733  
0.2641564 0.3695542 0.433058902 0.599936 0.96388642 0.6383798  
0.3106518 0.409880221 0.6683714 0.1920143 0.3133348 0.5083756  
0.3998347 0.539231128 1.07896 0.634802095 0.4301745 1.047614417  
0.683568851 0.670480669 0.631173 1.062698 0.751313356 1.211386 0.192529393  
0.2464361 0.499078665 0.764511 0.8732201 0.294796 0.308930803 0.2483159  
0.888049 1.131712 0.650144384 0.5680524 0.267160323 0.8162089 0.2149353  
0.8813177 0.2787613 0.5801689 0.2890099 0.4849988 0.636425845  
0.4649259 0.1626151 0.6997139 0.2264008 0.9438736 1.338499  
0.180564 0.640038 1.662849171 0.1337736 0.0642198 0.381087753 0.6378621  
0.241551162 0.6641933 0.259357 0.1347358 0.3765439 0.3374909  
0.8429008 0.354668568 0.636259281 0.1716193 0.2088977 0.4624928  
0.86990567 0.2545404 0.6893828 0.1587993 1.153493608 0.6881224  
0.5753217 0.321663005 0.5526311 0.354496253 0.384577631 0.2034246  
0.189682237 0.186224 0.4116508 0.359063438 1.270707 0.7543454 0.277576209  
0.8152009 1.258450719 0.467588427 0.1009304 1.579839892 0.2220198

1.025854 0.6762344 0.3702226 0.504244 0.986646607 0.3867882 0.9101875  
0.1046227 0.186921 0.304064 0.9714753 0.4392501 0.1821378 0.5780026  
0.7252245 1.187687 1.006017713 1.25949936 0.3365438 0.963252429  
0.683899216 0.2059316 1.041287753 0.5883738 0.1341316 0.181756204  
0.971697689 0.19699168 0.630517269 0.4330708 0.5453859 1.094072  
0.7468476 0.8260182 0.5536278 0.749754903 0.5798977 1.212341  
0.722771484 0.6068286 0.5671365 0.224301796 1.1623 0.4975099  
0.263107836 0.5705415 0.4690919 0.320741075 1.227534 1.067543 0.3375064  
0.972880753 0.6369159 0.6513409 0.309457973 0.2052096 0.730148557  
0.6671844 0.172609 0.443302632 0.6817105 1.373100058 0.6243187  
2.317223 0.1164755 0.2862083 0.1899041 0.543470296 0.2066362  
0.1259054 0.8267789 1.290798 0.139433 0.0921934 1.01497 0.7813085  
1.106782991 0.033196183 1.646797 0.5067736 0.6621834 0.1729676  
0.851750947 0.3520398 0.936614053 0.6119537 0.7339865 0.284130527  
1.111309659 0.09104383 0.09076439 0.342667023 0.2282995 0.2480956  
0.4509728 1.311484 1.058784 0.5936894 0.6182647 0.38578 0.2129577  
0.7699785 0.9018359 0.1055273 0.2051064 1.086721497 1.153146  
0.2940486 0.534541673 0.2796152 0.4140251 0.4569895 0.7963236  
0.2195352 0.841317455 0.6734803 0.3478026 0.4472046 0 0.7168962  
0.171343596 0.08793357 0.4693851 0.3702771 1.083367171 0.334484366  
1.265896 0.3335674 0.5625804 0.679740656 1.005248 0.4061646 0.596329171  
0.5344507 0.8934325 0.17728 1.626344 0.3394599 0.4530314 1.235246597  
0.4791987 0.153254603 0.4344225 1.081895 0.3768765 0.2120803  
0.2753581 0.6000193 0.2269576 0.414612564 1.392396 0.582726 0.050696542  
0.3971794 0.1044913 0.4654074 0.6091725 0.5371606 0.6127508  
0.2668084 1.105172 0.275505781 0.04636329 0.335568983 0.542817 0.9107767  
0.3614274 1.083393753 0.471789054 0.6543982 0.9649028 1.164257  
0.1561309 0.5211374 0.348153332 0.252743 4.185603 0.2122157 0.447422087  
0.09818017 0.1035066 0.259943019 0.136878 0.36962542 0.09239212  
1.283425 0.722731963 0.3382637 1.001405 7.56983313 0.672733974 0.05111225  
0.3355081 0.6051076 0.7102362 0.7618989 1.087949 0.6479059  
0.9233737 0.192411 0.553870961 0.07672883 0.235604563 0.2070488  
0.194659574 0.7234928 0.1284812 0.379414631 0.2644391 0.1701724  
0.2609268 0.255877108 0.4200768 0.2373134 0.125343254 1.186442567  
0.07947501 0.3147511 0.7792225 0.973682599 1.128754065 0.757908215  
0.3310354 0.2972876 0.2815373 0.3602621 0.2799436 0.412736  
0.2017691 0.267254 0.5564642 0.2188788 0.2744601 0.347864695  
0.4760783 0.2043489 0.8264197 0.4595454 4.389409 0.4486453  
0.4904942 0.264758 0.6786288 0.5609586 1.2102566 1.157329 0.1854339  
0.9091251 0.4852305 1.164161386 0.1638455 1.238952 1.400509 0.1010055  
1.232127 0.06886205 0.2333578 0.519253985 0.2536292 0.3214776  
0.192570902 0.2955713 1.036451 0.9754474 0.4914567 0.9086485  
0.305018267 0.536443093 0.7046456 1.318579 0.5636134 0.037053919  
0.801193716 0.539147509 0.5044458 0.4322478 0.5490293 0.3318763

0.6582986 0.1561938 0.2025056 1.003898049 0.642347371 0.1660499  
0.586359279 3.965146 0.412349655 1.049575 0.9339 0.4049173 1.050052  
1.088694 0.4226994 1.510023 0.03799283 0.2297742 0.954369796 1.270266  
0.6527616 0.3022378 0.3435013 0.790414449 0.2969189 0.5682162  
0.8707678 0.248591283 0.3449302 0.2170654 0.175007 0.3038283  
0.6061422 0.3723258 0.1908153 0.712748013 1.011273678 1.083650386  
0.07940606 0.404828825 0.15766716 0.7665914 0.6062242 0.905124898  
1.217145 0.3833772 0.1698639 1.044163349 0.204763 0.1677119 0.1525927  
0.122301377 0.2444818 0.2876329 0.2752336 0.4287062 0.2321706  
0.8432416 0.4064293 0.2763141 0.5729887 0.8577643 0.9066035  
0.212479771 0.1998111 0.5342626 0.2137346 0.8145141 0.4288229  
0.4063632 0.06762198 0.247487703 0.318350262 0.3391218 0.1758635  
0.6190625 0.3769318 0.2647741 1.242922 1.060661345 0.06068392  
0.9957121 0.2110531 0.3328114 0.4715144 0.129375173 0.7051379  
0.764249 0.3958358 0.5491095 0.4232199 1.93448 0.4669371 0.8113339  
0.1666691 0.5763056 0.284733873 0.07539452 1.016704 0.8247217  
0.7551148 0.6626532 0.971648007 1.072669403 0.183912439 0.1882334  
1.469628 0.3896234 0.3691386 0.377347 0.3839863 0.650180241 0.2973273  
0.057020709 0.09496728 0.8283644 0.314497 0.6592818 0.1286449  
1.365874437 0.2984709 0.3774419 0.7945673 0.7393788 0.05761601  
0.4263407 0.6013218 0.679461258 0.4103956 0.179049017 0.1253515 0  
0.892316712 1.383291 0.7132682 0.2192702 1.052619419 0.1953872  
0.9484896 1.409786 0.173082952 0.6051001 0.2206579 0.04553199  
0.173939 1.030546 0.7971882 0.4624406  
LINC00893 0.7456838 0.634645641 0.2084618 1.351701147 0.967280477  
0.652336588 0.6299488 0.247802065 0.2657657 0.1153737 0.1143638  
1.203241 0.534753 1.0386 1.065733 1.632126 0.4695444 0.409162303 0.1485257  
0.3471266 0.258740716 0.5291333 1.931012795 1.509851 0.8401005  
0.501591489 0.6856593 0.1058458 0.04710612 1.034328 0.3589446  
0.256646049 0.502516 1.566163804 0.3556937 1.630549567 1.113367078  
1.181430612 1.021091 1.059007 0.847317317 1.838071 0.118258898 2.085842  
0.620116881 1.500652 1.961235 0.204754 0.200266708 0.05279715 1.270229  
3.154269 0.697539929 0.5636391 0.135141227 1.255882 0.2532527 1.825177  
0.06146569 1.124856 0.09558819 1.37193 3.346851206 0.1480761 0.1075678  
0.9697848 0.2246419 1.105485 1.560408 0.1900194 0.3104765 2.43472854  
0.1106119 0.02655036 0.634277594 0.2736893 0.135468205 1.025163  
0.1919853 5.6595 0.2101604 0.1813873 0.9564438 0.20528264  
2.130691805 0.1305526 0.1305063 0.9839469 0.495756367 0.2525628  
0.2128084 0.3301374 1.945233311 0.7835671 0.7735457 0.376790784  
0.4912191 0.977061444 0.11356839 0.1065289 0.086865493 0.02239724  
0.1851652 0.676006739 1.54388 0.1746465 0.183613119 1.175554 3.244270762  
0.22206425 0.06676416 1.482711893 0.3377855 1.224212 0.8441369  
0.2170683 0.3993834 0.954352748 0.9156933 1.380294 0.08074101  
0.09891667 0.1585868 0.8826772 1.423736 0.8500661 0.6222418 1.5978



5.196447 2.68405377 0.859591727 0.1969326 1.717885063 1.389485422  
0.2203577 1.401765486 0.4660179 0.0591509 0.055105146 2.375712141  
0.078870318 0.990562924 0.6717246 0.4735052 1.141243 0.5510336  
1.888437 1.170933 0.60698762 0.4711546 1.083952 1.091886416 2.182664  
0.7134616 0.185465969 0.7923826 0.2424921 0.342966054 1.081413  
1.334283 0.553989333 0.6495987 1.065038 0.1963114 1.079926775 0.7830903  
0.6756569 0.063969531 0.08079973 0.325733363 1.58479 0.2112305  
0.420309281 0.4386443 2.159953558 1.565323 4.790986 0.1112902 0.3333734  
0.08524157 1.904371302 0.2186996 0.1589982 2.846829 1.62351 0.6258678  
0.03049238 1.972207 0.8786035 1.290143266 0.06038684 2.225356 0.2711373  
2.813474 0.4519427 1.113102751 3.163149 2.481563925 1.583216 0.65472  
0.164455128 0.720216131 0.1455421 0.1000658 0.607887357 0.285854  
0.3930052 1.123334 0.5638947 1.047125 1.664589 0.3499876 0.04029293  
0.04024823 1.390049 1.836447 0.07416777 0.1718553 1.475761691 1.991733  
0.764144 0.219655943 0.3144352 1.128963 0.9770533 1.064723 0.240759  
1.367720508 2.227493 0.4601339 0.6257733 0.04215109 0.8759854  
0.170012403 0.1628674 1.903453 0.08980898 1.359876928 0.110628569 1.51447  
0.2130419 0.660548 1.808551066 0.9616329 0.744296 0.315571308 0.8181748  
1.58302 0.02706195 0.8323751 0.1526929 0.2881485 1.780470677  
0.3698144 0.095039966 0.4486412 2.804923 0.9286387 0.2409301  
1.388862 0.3353164 0.2829364 0.775766601 2.067362 2.097823 0.037727005  
0.377673 0.05529572 0.7359803 0.4001615 0.585241 0.2837288 0.4412258  
1.113201 1.349741348 0.112452 0.16853627 1.278277 1.241082 0.2988495  
1.557338053 1.10384714 1.139907 0.4177773 1.687655 0.02581966 0.1895992  
0.090907494 0.1003117 4.196687 0.1359912 0.598654454 0.1745395  
0.05379652 0.538275096 0.1131788 0.268952747 0.1718893 1.554955  
0.738364863 0.604973 0.7158371 1.99009985 0.968186417 0.07607273  
0.4280162 1.628375 0.8867705 1.511959 1.942227 1.447239 1.237888 0.1562041  
1.123239566 0.04060411 0.147191111 1.295854 0.179351005 1.880824 0.09915345  
0.603156651 0.4787369 0.1031863 0.1208198 0.214395292 0.1080627  
0.1108093 0.070476019 0.88847164 0.8367663 0.2528189 0.3669749  
1.383762641 1.009095045 3.127719196 0.1824797 0.09286342 0.02865128  
0.09093362 0.1440282 0.3276235 0.2977356 0.1060711 1.855807  
0.1194481 0.1341905 0.388307344 0.4686305 0.6308129 0.7564333  
0.245869 2.997962 0.607036 0.2713121 0.1334355 0.7314044 0.3810958  
1.434353318 2.439406 0.1362913 1.24627 0.139683 2.305030465 0.4944914  
4.602092 1.396866 0.06681388 2.112083 0.09565787 0.160795 0.877266188  
0.1782583 0.1246589 0.228540436 0.1725147 1.238501 1.131741 0.3167566  
0.7813772 0.69574376 0.450053987 0.4078498 0.9429437 2.10984  
0.067404411 1.250751424 1.159077386 0.432888 0.513774 0.4888906 0.3742021  
1.472529 0.2442114 0.09568205 2.63613978 1.384874211 0.06712439  
1.180719413 4.184708 0.224629204 0.8430548 1.096226 0.3190538 1.285002  
1.550889 0.8636849 1.530964 0.1382248 0.2922936 1.712798674 2.108589  
0.2422256 0.2086189 0.3805964 1.46015167 0.1819663 0.1515596

0.8485188 0.422845613 0.4445322 0.1874595 0.135059 0.08541588  
0.9819315 0.276324 1.281152 1.957164135 1.913181642 1.376040118 0.1619555  
0.391765536 0.151701547 0.88446 0.1487616 1.238111543 1.526962 0.1156114  
0.08025915 1.532492241 0.1142843 0.08628612 0.05964526 0.1618016  
0.1386185 0.6160978 0.122695 0.1312888 0.2303668 1.278844 0.4570413  
0.336312 2.832967 0.4015447 0.9064531 0.140552657 1.633799 0.9844935  
0.2960201 0.733354 0.1903514 0.195843 0.09691734 0.064801858 0.15583263  
0.175558494 0.07158858 0.8872543 0.1285637 0.6448509 1.266418  
1.17115558 0.1906728 1.626668 0.1015338 0.1179378 0.1938843  
0.06253925 0.7720381 2.23678 0.4867544 0.6220295 1.119818 1.233382  
2.429404 0.959185311 0.08904764 0.6671329 0.386113037 0.1153302  
1.487341 0.9756825 1.709552 0.657505 0.920276445 1.523460873 0.23655281  
0.100569 1.615571 0.2505717 0.1960843 0.5044206 0.1808803 0.865172861  
0.4769446 0.150873885 0.1308743 1.00458 0.7512403 1.596713 0.07445984  
0.762335303 0.5429455 0.2592758 0.3488047 0.4118649 0.3906506  
0.8140092 0.4551369 1.066503271 1.536879 0.142823065 0.1492531  
0.006241455 1.005765355 4.091637 0.7384975 0.1977879 0.779704566  
0.1148854 1.307112 1.865111 0.224213821 0.5718086 0.06255529 0.1656536  
0.1371851 0.6764492 1.284843 0.2476322  
OIP5-AS1 11.50866 11.22207484 9.891277 9.37908729 7.125438913 10.674034892  
11.78437 9.808278183 12.24892 9.931127 9.90332935 7.763695 14.14747 17.65753  
10.8847 6.767249 8.85199 8.401639265 17.9339 12.64694 12.929364979 8.737705  
8.21392778 11.941 5.233703 8.034363871 14.04146 8.089108 18.33944 8.404185  
18.15917 9.778895215 8.622091 9.627570265 10.73999 10.88154988 8.445730792  
9.45745952 12.65292 10.25388 12.26249822 12.36434 11.138312945 13.26385  
10.803108893 13.87835 10.83399 3.202584 9.091506153 13.08779 11.13639 3.327361  
7.994431193 10.65356 8.401830731 9.49626 9.970491 8.670837 12.58065 7.7583  
15.18407 8.714263 10.094575318 10.37537 7.907663 7.363317 16.46093 13.1111  
15.14252 20.3756 13.74185 8.198064298 12.88323 18.19067 8.185251564 13.65481  
10.368165908 14.38835 16.44316 4.999502 11.49948 12.46341 13.77795 14.273695721  
9.302223151 4.169532 8.634444 14.44829 9.404470791 12.66512 9.864649 8.498802  
9.198013469 12.83561 17.58932 3.176780694 20.77556 6.020316522 10.274336654  
8.831823 7.962654195 7.764322 6.187319 6.593503956 9.762873 11.46733  
12.781658332 14.24135 16.247176378 8.852493653 11.27452 9.639750881 8.645476  
5.258706 12.18967 7.396613 9.488156 14.419366515 7.415902 9.899867 12.27673  
16.64378 11.01309 13.58025 4.73471 16.95072 7.158177 9.753406 11.5893 8.577162529  
10.99197893 12.23333 5.434332837 10.238392316 9.427282 14.871671972 11.428  
10.02145 7.077606385 6.976574209 13.139766439 11.731337736 21.7547 10.83286  
11.76753 5.183881 9.627217 9.928176 7.918308067 17.74345 11.71634 11.584604111  
10.80543 11.92902 8.693313569 9.186551 11.55711 6.224713648 9.977399 8.159033  
7.837064093 12.40159 8.385163 10.27452 14.671275924 8.81938 7.896091 9.399158161  
9.863146 17.472575208 9.023766 7.932565 9.480340265 11.30269 10.551036649  
8.264692 9.265725 7.749178 10.479 4.160581 7.901162707 12.28345 7.420902  
8.827757 13.48508 13.48204 8.13066 11.1785 10.87229 12.762657869 10.500544801

9.028153 12.71146 4.870913 10.51142 12.66781203 6.811925 9.799525263 8.705521  
7.774038 6.756367453 12.426098207 6.745122 6.915082 7.563948724 6.630693  
9.332945 9.314664 12.76117 14.06036 11.72288 9.634368 9.493507 7.144186 10.278  
11.90878 11.6838 16.357 14.287266603 13.44392 6.013572 10.515729446 4.801086  
13.40054 8.756378 10.58013 13.78055 5.822298863 10.49016 10.68102 8.063206  
4.546536 14.51618 7.079074252 7.614169 8.010261 11.36193 9.368624936  
12.729910663 12.54772 12.54666 7.01128 14.254709305 11.80589 7.828543 8.313735344  
9.819786 11.6268 9.244165 8.874552 13.96447 9.459715 13.101664524 11.21351  
7.9497938 12.5043 8.488845 11.98154 9.484794 6.036788 13.47573 8.038052  
4.355488842 9.348432 10.12723 8.416274033 10.52912 9.241518 11.38844 11.47386  
4.302003 14.25048 10.41612 8.412908 7.479309109 8.116994 13.123204799 10.15001  
14.58265 13.44794 13.867831087 7.440316521 43.61542 9.305073 13.59115 4.59653  
10.26299 12.074910177 12.35888 33.99068 12.08242 7.253704967 11.02502 11.36289  
8.265089109 12.10847 12.333349983 4.780718 11.88361 13.625991259 11.12634 10.6506  
9.73073686 10.86297916 13.70386 7.303261 9.237102 14.45128 12.70025 11.3254  
11.87729 4.882178 8.576731 7.944658976 12.97468 13.370198001 7.235581  
19.239188485 12.32394 9.395194 6.07025551 9.606089 10.94152 6.256654 6.159636828  
12.50032 10.45818 8.758467955 13.385046441 7.434165 13.2979 15.58975 7.807439304  
8.675342289 9.665938054 5.878591 9.601959 20.95657 11.05385 10.69624 18.78947  
9.470045 8.581921 13.24421 12.93504 13.50249 13.967153173 8.531482 5.499682  
12.53828 8.929577 23.56994 15.95498 15.87602 14.47794 11.30793 11.64917  
13.985393538 7.39854 7.664609 9.253158 12.95498 9.075096581 9.995969 5.684748  
13.47448 8.752247 7.536699 10.55628 11.84892 8.565499785 12.47267 12.64245  
9.006362703 8.788361 9.091422 9.801108 15.01975 12.02354 12.710428719 4.706027987  
10.23353 13.57216 10.63302 11.47336475 7.749905786 5.701394806 8.369957  
13.45602 13.09821 7.714533 10.48213 13.73103 9.846103 14.690221874 11.718865815  
8.794875 7.601232034 23.21134 13.289525196 10.76202 10.40657 12.89092 10.00105  
10.05219 13.27222 15.38172 5.758758 14.73118 14.314051902 8.038905 36.73673 7.90915  
9.634581 11.953223315 11.16121 8.584023 12.87813 8.417540535 8.448743 10.6553  
9.721046 9.82925 12.84181 14.73672 5.858147 10.494070331 5.921450923  
11.048076543 11.34385 9.080774885 10.513047119 11.53835 36.77999 10.310727767  
18.71591 9.78705 8.683554 15.132345573 10.20761 7.224807 11.36857 6.553680688  
9.308262 7.916587 14.33069 7.450859 16.88823 13.90313 10.97035 5.670934 5.564933  
16.36559 11.36294 11.211849816 20.9959 8.259242 11.44643 11.87908 11.58444  
10.91942 6.868177 9.864161104 11.582131674 11.704884713 10.24931 12.60546  
10.91415 8.496855 14.10522 12.062226917 16.22448 10.4482 6.614085 9.594569  
6.362401 10.633659349 8.067517 4.779602 12.06209 8.673036 11.40299 10.01623  
4.378414 11.302388171 11.49456 8.772948 6.611029394 11.59456 13.07548 9.275805  
13.31264 12.44116 13.525941357 12.570129382 5.758471531 8.182389 10.97193  
11.30264 15.63265 12.276 10.65454 12.199672559 7.092198 6.732688107 7.827808  
6.69148 12.65247 10.07277 7.316534 11.04535763 6.915475 12.08417 9.634098  
9.952207 5.407067 6.126317 12.68559 8.944000041 7.289379 13.488677852 8.306295  
8.315737 10.296853174 7.303897 11.90825 9.44587 10.862981732 8.135228 9.710863  
16.40112 7.053256632 15.31585 10.47964 4.731267 11.01936 12.64283 10.5701

16.44266

ALG13-AS1 0.1621384 0.298208982 0.8375656 1.179417636 1.038038364  
0.975671998 3.087092 1.498873248 2.128488 0.4846234 0.487771758 1.030918  
0.5813725 2.779433 0.5650758 1.556427 1.265563 0.894448875 0.5651591  
1.084329 0.683151313 1.140938 0.841723526 1.914336 2.792587 0.626381056  
0.9002245 0.3912496 0.4353089 0.6591898 0.6110294 0.562769797  
0.9422129 0.839012166 0.8217436 1.946276921 0.551881808 1.413285512  
1.258124 2.530942 0.752892409 1.221441 0.084064116 0.2738944 1.40170895  
1.625502 2.110308 0.3604071 0.528762794 0.5421109 1.339496 1.399137  
0.969320958 0.4960575 0.096064888 0.2169278 0.3284652 1.823406  
0.1262236 0.366876 0.1261904 0.7021683 0.389035696 0.1052596  
0.9112003 2.036774 0.06590227 1.221825 3.159387 0.3010241 0.9129021  
2.798147346 0.2453202 0 0.826604238 0.9484385 0.320991065 2.54751  
0.6039629 0.4118078 0.1438591 0.6446941 1.585385 0.993678262  
0.972334696 0.6294467 0.2837675 0.2292272 1.308942086 0.5445859  
0.4214073 0.1386731 1.479860365 1.322002 1.070342 0.327711369 1.2668  
0.481549326 0.503754436 0.1036248 0.178383611 0.2069735 0.2013078  
0.168837719 1.505964 0.4611178 1.060483464 1.12952 2.00220526 0.65960403  
0 0.66032668 0.8143004 1.440603 0.2666903 0.4114735 0.6489164  
0.56898053 0.995523 1.006221 0.07105998 0.2285229 0.2859521 1.365162  
1.380887 1.113376 0.9699052 1.573059 2.696615 2.323184381 1.710909673  
0.2373729 0.577273452 1.109126348 0.8885811 2.456745842 0.9464798  
0.36441 0.925869211 0.815268529 0.19013286 1.686229517 0.1825713  
1.000154 2.939722 0.3511804 0.9744265 1.603055 1.162880471 0.6164888  
1.547315 2.029971081 0.9273586 0.9905153 0.533212018 2.899971 0.5602189  
0.851469339 1.877948 0.344097 0.653544208 0.9478355 0.5348936 0.6402773  
1.547861137 1.015657 1.900276 0.236457631 0.298669 0.830375271 1.575737  
0.5275638 0.180655295 0 2.251918445 1.600404 4.395962 0.1582209  
0.2282009 0.5804249 0.808087226 0.7578781 0.349835 3.248968 1.555856  
0.6088063 0.4226713 1.648025 1.910399 1.237603495 0.202922306 1.725698  
1.093347 1.349269 0.105732 1.58737825 0.3586594 2.647206503 0.9144087  
3.127113 0.814143242 1.927810352 0.4637788 0.9247107 0.571271456  
0.7974593 0.1596383 1.292211 1.670181 1.332502 1.649598 1.526272 0.372348  
0.2479566 1.470856 2.594241 0.1612674 0.3343409 1.250434533 1.424035  
0.7703427 0.594101327 0.5127713 0.787379 0.3990707 0.5178493  
0.6356744 0.784498363 1.372288 0.7795533 0.6308495 0 1.095564  
0.349130883 0.2150089 0.7485044 0.3772396 1.436189436 0.511160723  
2.055459 0.2812466 1.633503 1.292707928 2.363424 0.335515 0.729050638  
0.5600573 0.9752486 0.1667201 1.233623 0.4980137 0.6390691  
1.584744351 0.8876531 0.70261341 0.3793638 2.986709 1.151889 0.5072905  
0.1402679 0.2529524 0.7470351 0.796542117 2.035351 1.233034 0  
1.441557 0.06387364 0.8001426 1.034378 0.7726039 0 1.055322 2.149547  
1.263088041 0.1889403 0.607784582 1.592709 2.078501 0.7364469 0.679240159  
0.213626801 15.20083 0.6434485 1.405806 0 0.5574834 0.560052324

0.4325923 20.14633 0.08107728 1.118868099 0.3000789 0 0.27634522 0  
0.112972692 0.2117912 2.312313 1.570819828 1.072164 1.053145 3.55946394  
0.778003087 0.15622 0.6592181 1.681325 1.736619 1.55245 0.8813833  
1.320177 0.6020712 0.1069249 0.267293192 0.1876118 0.560081048  
0.4867894 0.254982651 1.238323 0.08726472 0.374079603 0.6806184  
0.2600584 0.1063333 0.312826167 0.8559513 0.2559978 0.153240163  
1.505238021 0.08096941 0.6871489 1.087263 1.022990884 1.024733317  
1.895300543 1.079232 0 0.7943015 0.3477186 0.3802767 0.4415217  
0.4743763 0.4901027 0.8503914 0.3344917 0.5835566 0.265804306  
0.4850302 1.249148 1.644758 0.9088326 26.39538 1.74522 1.137287 0.4624052  
0.7152303 1.112121 1.585303151 2.158336 0 1.316207 0.8239241 1.634827882  
0 3.689648 1.404549 0.1543572 2.510591 0.08418827 0.416055 2.058879833  
0.775195 0.474343 0.276976791 0.3188426 0.8175014 2.839398 0.9243651  
2.221762 0.514350874 0.639840067 1.076843 1.851676 1.305026 0.339755939  
1.567217082 0.823927988 0.1666804 0.8257042 1.290814 0.3688545  
1.482549 0.5207916 0.2652601 1.394692861 1.454279329 0.3383445  
1.159629392 18.28884 0.148271731 2.383035 1.567111 0.2911984 3.209389  
1.257636 0.5741967 2.070392 0 0.4321748 1.147650741 1.465077 1.557157  
0.5622903 0.7349166 2.121217313 0.8541231 0.8963623 0.8585238  
0.289446456 0.7270678 0.3685783 0 0.5571744 1.814811 0.3330674 0  
0.810586172 1.15392377 2.484060115 0.3235967 0.549921321 0.175234736  
1.198753 1.67356 1.707674704 1.128856 0.8271234 0.2966708 1.894888745  
0.3911497 0.1139103 0.4239872 0.10680091 0.1067481 0.9209873 0  
0.1941188 1.115099 0.5028863 0.6388533 1.283684 0.9879064 1.129339  
1.656201 0.173180094 0.4749925 0.9331005 1.061549 0.5532199 0.4138923  
0.5677773 0.413361 0.126070659 0.233522162 0.360520121 0.5788579  
0.6880397 0.2880146 0.4414136 2.69598 1.496222868 0.4636874  
1.106656 0.1172845 0.4359464 1.246393 0.060834401 0.3715846 0.9696016  
0.6824719 0.839152 1.17594 2.279543 1.20759 1.688353534 0.3134825  
0.770624 1.218368943 0.2880457 1.195179 1.228027 1.950372 0.6354008  
1.169903459 1.446404896 0.374741243 0 1.87427 0.4631079 0.4102687  
1.249438 0.4978993 1.756145749 0.5452525 0 0.193506 0.5957227  
0.6408213 2.600046 0 1.669869055 0 0.6211786 0.7947896 0.3171712  
0 0.8292277 0.7068793 0.703970291 0.8092498 0.643820296 0.2298754  
0.1153549 1.076560244 5.188792 0.3791374 0.4874034 1.407541094  
0.2654148 1.546119 1.740963 1.410700027 0.3019484 0.2890375 0 0  
1.356825 1.160254 0.6730516  
AP001160.1 0.6199411 0.481422343 0.3415954 0.573941202 0.411596911  
0.301993714 0.3147623 0.38206573 0.2921454 0.04941258 0.414446592  
0.3941744 0.2037654 1.018444 0.5144247 0.7556882 0.4378067  
0.331631669 0.1852202 0.4376295 0.130602457 0.4985612 1.8881014  
1.388832 0.9396232 0.478997278 0.1941661 0.2659474 0.1109611  
0.8161398 0.4895081 0.163944143 1.080774 1.898059386 0.3351425  
0.768170018 1.105309504 0.918635583 0.8551955 1.333294 0.518167129

0.9535022 0.085712432 0.628346 0.798666922 0.7251014 1.170771 1.286159  
0.07701867 0.1658222 0.736792 2.298364 0.938910888 0.2212805 0.293845541  
0.9953156 0.209316 1.880286 0.08043658 0.2182073 0.1929971 1.272776  
1.685821348 0.2414779 0.126691 0.7528077 0.1511876 0.4325634  
1.424822 0.1023089 0.2659435 1.441062679 0.1875978 0.07504902  
0.49802537 0.2417588 0.196371005 1.298731 0.1154635 1.819491 0.1100099  
0 0.7072061 0.09210565 2.757331479 0.267412 0.2350819 0.6232582  
0.646450565 0.3569555 0.1432234 0.1413922 1.020711071 0.6280097  
0.5846406 0.605623462 0.1345458 1.288852607 0.107006661 0.2113134  
0.068205498 0.3956846 0.6414218 0.516444788 2.242628 0.1410478  
0.054063863 0.948432 1.450514028 0.560447868 0.09829168 1.851504221  
0.4612595 2.786496 3.161064 0.1573281 0.5789353 0.725171263 0.6026818  
1.433314 0.4528332 0.09708488 0.1822244 0.4175789 1.212412 0.3468686  
1.006582 0.5467853 1.42762 2.020393337 0.747624395 0.3428719 1.500910974  
0.391456358 0.1887509 0.740089211 0.3860153 0.09288882 0.401209992  
1.573445424 0.129240637 0.798243105 0.4653778 0.3611667 0.7493409  
1.104038 2.122548 0.7491401 0.71489653 0.5500047 0.8303443 0.91313578  
0.6500602 0.3945067 0.524250472 0.7207282 0.2244014 0.482313787  
1.196732 1.023295 0.203609633 0.6241466 1.690683 0.1269395 0.436084717  
0.6472325 0.8073067 0.140638199 0.1522626 0.105832142 1.252229  
0.134477 0.20722225 0.2124442 1.982972748 1.129697 1.689702 0.2823157  
0.6398574 0.4015825 0.89259308 0.3005094 0.1248431 1.978402  
1.048133 0.341409 0.03591324 0.5436391 1.151007 0.694028627 0.07758794  
3.88564 0.3483703 1.931307 0.2695129 0.404625828 1.188499 0.910165847  
0.6780642 0.9357347 0.138351139 1.029605529 0.2600799 0.2357106  
0.631012262 0.635231 0.2238066 1.163834 0.4938496 0.5175733 0.5886802  
0.7410473 0.09491223 0.01580116 1.224752 2.507342 0.1849831 0.1065302  
0.677318706 1.597154 0.6545395 0.176677192 0.326766 0.2580486 0.7374983  
1.082406 0.2340501 1.888607169 1.958874 0.1083871 0.7236215 0.0567367  
0.6205811 0.244733903 0.5480618 1.303768 0.326941 0.732175006 0.260591741  
1.078701 0.1433806 1.008085 0.659027571 0.6747344 0.6328735 0.351024381  
0.3093127 1.441838 0.02124864 3.311003 0.190417 0.5158499 0.974243067  
0.5204084 0.149247947 0.4835029 1.957675 0.7927708 0.1580448  
1.036882 0.1934342 0.4352473 1.199782689 1.438532 2.374733 0.118490741  
1.199066 0.1139706 0.4305778 0.3427646 1.378568 0.1636748 0.3912779  
1.095848 0.858569649 0.2408063 0.251753908 1.014961 0.5298141 0.6100957  
1.060480347 0.89848919 0.3398879 0.7927453 0.8958569 2.858523  
0.2436062 0.085655061 0.2993005 1.694662 0.1860008 1.330941138  
0.1912267 0.06912037 0.316984223 0.255935 0.201578726 0.2699299  
1.010423 0.675683529 0.7222844 0.4865634 5.14144792 0.934911273  
0.1991039 0.112024 0.7500026 0.691668 0.7726014 1.388846 0.9071296  
1.035917 0.3270644 0.431512539 0.1912905 0.061185325 0.3970674  
0.151656348 0.6538483 0.1112197 0.781899719 0.4771002 0.1767717  
0.1626273 0.531600022 0.2424263 0.1522602 0.195306091 0.627853292

0.4540638 0.2627334 0.263948 0.805992818 0.57465437 1.556706547  
0.2750983 0.1286735 0.03374484 0.1181789 0.2907998 0.3537121  
0.09673556 0.2706776 0.4696606 0.0852626 0.1673434 0.101631058  
0.6535001 0.3396377 0.4491985 0.2527235 1.612552 0.3177571  
0.2898968 0.1375126 0.8204113 0.4488462 1.616387527 2.353479  
0.1926251 0.764203 0.08400795 1.61785735 0.6063353 4.900493 0.528509  
0.1967298 1.445058 0.1072988 0.1363542 1.530703144 0.2305319  
0.103638 0.158854336 0.2980032 0.3646698 0.844396 0.4516097 0.6662724  
0.327772616 1.223223658 0.5067496 1.082814 0.8515932 0.057736303  
0.474390465 0.810080459 0.3823844 0.2736157 0.5703207 2.374049  
0.4858774 0.331877 0.1352306 1.113931161 1.371585014 0.4312234  
0.591183611 1.797344 0.37794755 0.6074402 1.027182 0.1484541 2.028837  
1.215509 0.3366369 1.011515 0.2663968 0.1927839 0.560698646 2.614157  
0.04961529 0.2457067 0.4281867 1.471912232 0.2041103 0.1142422  
0.5398038 0.756249808 0.7783903 0.281854 0.2120927 0.2603789  
0.6553483 0.2122488 1.189291 1.523822533 2.500168168 1.537751499  
0.1031068 0.256989376 0.111669195 0.7222435 0.2437678 0.452701216  
0.3400653 0.07027846 0.2646769 0.864335217 0.2193506 0.2032518  
0.08646014 0.245013851 0.1904721 0.3628132 0.1305228 0.5937753  
0.284241 0.8011669 0.2895022 0.1205524 1.510916 0.8430499 0.909287  
0.154503809 0.3286363 1.159515 0.3330349 0.7990953 0.2110039  
0.09045471 0.1053665 0.096406975 0.099208761 0.16082025 0.1053943  
0.526148 0.1101232 0.8626318 0.812158 1.271300476 0.3073065 1.433952  
0.1644283 0.1111236 0.1985675 0.155068081 0.1704918 1.550326  
0.5693348 0.4491931 0.3197326 1.325543 1.231268 0.268977891 0.2197451  
0.5893007 0.310564633 0.1321622 0.6702375 0.6260532 0.9777357  
0.4049123 0.665239222 1.032336044 1.018904295 0.1579306 0.6424983  
0.2529581 0.1045783 0.4654768 0.1087847 0.848169464 0.2779719  
0.444239774 0.2219628 0.6074035 0.3811421 0.414223 0.384197 0.771495875  
0.387557 0.2035795 0.3826765 0.3031784 1.391521 1.298427 0.6666842  
0.610107586 1.588351 0.328222112 0.05859568 0.1764251 0.786662976  
2.155402 0.9422681 0.2795402 0.495464979 0.06765476 0.9113766  
1.042871 0.561859692 0.2501436 0.2701462 0.07094657 0.1459374  
0.7905309 0.7689529 0.1887184  
ALOX12-AS1 0.3685537 1.048412678 0.7463107 1.47531358 1.181520198  
1.292649499 1.160178 1.085211566 1.071853 0.8695201 0.803223777 1.410479  
1.436037 1.858508 3.185468 1.599348 0.83836 1.128708693 0.734087 0.7120438  
1.009357657 0.8447218 1.449009912 1.570982 1.516695 1.009959134 1.418756  
1.407136 0.796871 1.14734 1.005313 0.916165939 1.236082 1.563856606 1.016132  
1.754395137 1.395450516 1.687639507 1.377796 1.585281 1.273270486 1.87872  
0.937587964 1.282523 0.914626047 2.198464 1.279173 0.7209262 1.048532465  
1.136967 1.521323 1.031847 1.551154582 1.330543 1.001559326 2.287957 1.503211  
1.833738 0.8033656 1.9125 0.7878566 1.655199 2.224529569 1.06552  
1.039382 1.580288 1.314256 1.604666 1.694107 0.7298689 1.596839 1.883028747

1.130135 1.30875 1.334615344 1.159383 0.716018615 1.664825 0.8557471  
0.7654991 0.697607 0.6877806 1.67212 0.722787421 1.672380919 0.9411373  
0.6751277 1.667366 0.887640339 1.02332 0.7407704 1.1726 1.931240912  
1.522542 1.621982 0.844236237 1.004639 0.817301622 0.671776975 1.143191  
0.751490172 0.8531141 0.9090764 0.777797637 1.768042 1.050953 0.681386174  
2.062047 2.951076876 0.728564808 1.327625 1.93125541 1.06945 1.304706  
1.083093 1.178494 1.111196 1.324378678 1.365285 1.844129 0.7107102 1.117397  
1.13532 1.750161 1.07419 0.6448833 1.259813 1.88103 2.074642 1.731269166  
1.566725702 0.9832122 1.224709763 1.287717411 1.346544 2.829419752  
1.434283 0.5908777 0.376017446 1.659029279 0.610824715 1.255742661  
0.9019317 0.8790597 2.842173 1.050157 1.793438 1.247014 1.397332008  
1.335933 1.989361 1.628572129 2.663057 1.144523 1.117379774 1.691913 0.9944825  
0.785652727 1.471694 2.044045 1.166438605 1.393247 1.925916 1.129823 1.925868159  
1.616069 1.524845 0.735760299 0.7712288 1.113630808 1.848478 0.9337732  
1.505694775 1.106826 2.655567205 1.42529 2.537746 0.6713445 0.8668371  
0.7539157 1.376955179 0.8371134 1.195985 1.816204 2.061325 0.4575983  
0.6789412 1.933278 1.431706 1.775424349 0.399757573 1.080908 1.281292  
0.9625655 1.236936 1.535666332 1.195717 1.634470273 1.708169 0.8818265  
0.796174895 1.346616494 0.4947743 0.4035728 1.373573116 0.8519639  
1.524057 1.634444 1.749407 1.51925 1.35988 1.119 0.7974751 0.5298079  
1.616707 2.896042 1.344104 0.47119 1.312212879 2.775143 0.8794167 0.750244527  
0.9324564 0.8386379 1.554199 1.431369 1.001824 1.785869757 1.86882  
1.099706 1.70802 0.5059478 1.977488 0.513196351 0.9383663 0.9301046  
0.8826492 2.128018747 1.192893729 2.47353 0.835347 1.089171 1.410446014  
1.575861 1.305661 1.148985618 1.686091 2.34096 0.6265608 1.785842 1.1924  
0.8522245 1.977706705 1.146058 0.610445906 1.176046 3.336323 1.347571  
1.086488 1.09681 1.303291 0.8215428 1.119282695 1.721625 1.785479 0.817133073  
0.9427917 0.8866265 1.19097 1.294742 1.375683 1.0444 1.360791 2.345325  
1.639717573 1.22544 0.842741406 2.027399 1.606364 0.8760617 1.909373225  
0.964707288 1.099221 1.501613 1.741553 0.01446286 0.7434268 0.930170832  
1.067601 4.457306 0.5897446 1.130345453 0.8003347 0.4383138 0.887792307  
1.0955 1.198381452 0.5948191 2.217563 1.392533975 1.513333 1.344565  
3.02062063 1.893098236 1.060567 0.9590118 1.452279 1.368458 1.617667  
2.520711 1.777906 1.386804 0.6934996 1.33397333 0.7676222 0.989387809  
0.5488297 1.617717099 1.383277 1.094946 1.088400709 0.9231033 0.8932686  
0.5929806 0.701598008 1.049208 0.9362184 0.510879935 1.692100728  
0.520248 1.595266 1.252194 1.048517234 1.7516346 2.291308578 0.817727  
1.009749 0.3049308 0.5163897 0.8643995 1.192867 1.069669 0.985309  
1.228534 0.6934179 1.021383 1.345339946 1.419616 0.6764116 1.598725  
0.9515428 4.720569 1.58681 1.29414 0.9810119 1.942261 0.6404115  
2.706645184 1.344627 0.9313904 1.507003 0.7225023 1.288246403 0.8878825  
1.983421 1.836535 0.6549505 1.698532 0.8062918 1.134872 1.164799905  
1.108153 1.150101 0.763903194 0.7988409 1.771528 1.698166 0.8731472  
1.509132 1.301665854 1.115046123 1.205047 2.17878 0.9017942 0.686482313



1.597147421 0.606448173 1.374064 1.62664 0.6728927 0.642801 1.187507  
0.7418488 0.9379339 3.082891182 1.251756127 0.8682107 1.533632564  
4.354209 1.357121893 1.255593 1.709842 1.275294 2.233304 1.654874 1.190338  
1.375247 1.098048 0.6680104 1.744932137 1.944859 0.5722261 0.7011462  
0.9991329 1.792957231 1.287855 2.349921 1.356505 0.921109135 0.9827959  
1.537099 0.7853524 0.557261 1.590498 1.282004 1.081757 1.63370783 1.708672148  
1.88574127 0.8336361 0.794454256 1.141858302 2.199707 0.6883676  
1.432599469 2.500664 1.107181 0.9261163 2.025155952 0.791905 0.7249965  
0.7041852 0.7833284 0.88 1.613881 0.8779384 0.8766122 1.210516  
1.737514 1.092889 0.6593471 1.796473 2.69421 1.208558 0.839791565 1.13111  
2.997698 1.009742 1.570494 1.200056 0.9335365 1.085763 1.283828035 1.023882527  
0.983389514 0.8872188 1.098254 1.130415 1.034585 1.645323 1.856209346  
0.9949748 1.939744 0.8673293 0.8367948 0.7035658 0.726438766  
1.928035 1.506723 2.527231 1.266553 1.050194 2.361939 1.963054 1.311235866  
0.8598356 1.274563 0.880949079 1.02665 1.688 1.410394 2.289581 1.9739  
2.007419053 1.928839604 0.938891645 0.6169876 1.410328 1.054687 0.8911261  
1.194287 0.7846905 1.361434588 1.079658 0.507071324 0.7037675 1.005062  
0.504968 1.205663 1.052646 0.841390542 1.124361 1.011253 1.102708 1.187174  
0.7952335 0.8616692 2.665135 1.438029458 1.270474 0.901488506 0.6223856  
0.6992292 1.983788973 2.918057 1.677657 0.9823445 1.779505971 1.025626  
2.04424 2.891503 0.603916209 1.157649 0.7884067 0.4850423 1.036156  
2.091362 1.373767 1.366711

BACE1-AS2.675998 3.888096558 3.148247 4.582544238 5.149564095 3.045054031  
7.640487 3.304756412 0.937201 5.585023 3.815787875 2.346368 3.397147 5.170643  
4.913411 5.882833 5.122663 4.638929165 4.036061 2.534433 3.340138665 4.649315  
7.901659011 4.776476 8.674506 5.378173936 2.668963 2.712332 3.421988 7.151205  
3.897298 2.837841828 4.674187 3.862062485 5.299522 5.426563089 5.972033855  
4.826881683 2.608576 7.050482 2.614496243 4.602812 2.133270887 5.539528  
4.641033 6.144839 8.834652 5.501321 2.536642311 2.048034 3.726073 7.548996  
5.585451194 4.093566 5.150563163 5.711865 5.233106 7.780538 1.408899 4.293383  
3.443072 7.041149 8.387868449 4.619269 4.093593 3.264419 2.36397 2.331271 5.70359  
2.967533 4.130646 6.123426807 2.68364 3.014812 6.036299142 3.016072 0.955435245  
4.25312 4.177361 3.928695 4.144746 2.460183 4.476929 2.757762123 5.890378854  
4.54378 4.00662 3.440651 4.027206235 3.577413 2.278156 3.373542 3.687300288  
3.198875 3.515567 7.300155542 1.228685 8.085505311 2.97964341 2.55057  
2.790952968 1.480913 4.935685 3.350321865 3.901796 1.372525 5.078802658  
3.803207 5.086970673 3.174317502 2.560393 5.023926266 4.367635 8.553323  
13.48456 3.120777 3.698967 3.061471559 8.785101 4.280235 5.925026 5.464872  
2.414295 3.112689 4.113159 1.746685 3.07993 6.084725 6.253404 9.621545534  
5.059906542 3.819567 6.586678786 3.695279075 4.846114 4.985826043 3.738225  
2.485708 2.720533504 7.088870399 2.56363093 2.466646896 4.389214 2.655741  
4.445179 5.382819 7.555229 4.010252 4.320140441 2.676026 3.045544 2.711262745  
5.352502 3.390055 2.921337021 6.985682 2.96241 3.520017572 2.45703 4.573931  
2.881904008 4.732222 5.715301 2.904846 3.839362018 4.683253 5.69764 3.278478106

2.735363 5.347267368 8.453692 2.697699 4.050160903 2.500971 6.07399013  
6.929342 8.068072 3.245309 2.801155 2.388959 3.734701889 1.638856 2.99037  
10.91732 4.452916 4.739396 2.580693 5.475077 7.588408 4.581070472 3.116803223  
9.219483 2.798893 4.1191 2.42087 3.779886213 5.451833 5.262366542 5.107252  
11.25873 2.640787521 4.536579154 3.734282 3.105291 3.724164459 6.371579  
1.842791 2.827185 2.676866 3.680493 3.540907 3.771945 2.178709 1.750496 3.1432  
8.559154 4.153976 3.301289 5.040125984 4.22508 2.425223 1.605875653 3.571086  
3.455377 5.99631 3.576808 5.013244 5.804417924 8.780227 3.745559 5.416541  
0.7007426 3.948463 4.280013253 3.405008 4.451111 2.332094 4.734600365  
2.389501324 4.648561 2.844113 2.214541 4.668764479 2.922135 4.890903 3.013932432  
3.811349 6.60583 2.926574 4.31988 3.088221 2.76388 4.2687945 3.11634  
2.614175627 3.371003 8.995823 4.000053 2.43056 5.566796 1.761633 4.031734  
2.293548151 6.284204 6.979554 2.95647153 3.228248 1.559967 4.664889 2.417683  
4.846256 0.6329988 2.489515 6.108137 7.270171627 2.88402 3.348539201  
4.431766 5.495506 6.077309 3.499216672 5.665708833 4.986574 5.852107 3.637885  
1.547866 4.026832 2.073070393 3.926528 5.227796 2.506097 4.340814104 3.435345  
1.48318 3.176820848 1.708216 3.017763703 2.640136 6.1137 2.547586952  
5.216573 3.679761 9.05538772 4.432138081 2.414379 2.194169 3.849608 3.520603  
3.794324 6.130561 5.727827 7.452619 4.753555 3.315010971 3.257507 2.503689112  
6.185845 6.486838481 3.881659 4.528885 6.038347561 1.834323 2.811786 4.706963  
4.377117597 2.340884 2.377123 3.786396501 3.576982185 1.838449 3.146631  
3.121663 4.684537512 4.39271689 7.453550653 3.24324 5.605607 1.41451  
1.404314 3.373932 3.117005 4.199762 3.537899 3.785989 2.60393 3.785695 3.65155817  
2.763126 5.815506 4.382322 2.364646 6.451459 1.997952 3.274684 5.51425 3.862034  
2.793904 4.671628823 4.461335 3.124032 4.241398 2.420983 4.367005985 6.784036  
8.466449 3.7774 2.267782 6.520942 3.084157 2.528956 3.551920259 2.588408  
3.296995 1.862885728 4.380186 4.484459 5.363461 2.381009 3.565894 2.343077091  
3.235199166 1.991422 5.091735 3.177265 2.398570545 4.784459195 6.018797407  
3.084891 3.182435 4.745196 8.251857 5.313986 3.01417 4.268299 6.173767614  
6.409785946 4.174681 4.002794747 7.357494 2.659315886 3.322725 5.211292  
3.861513 5.56022 4.039324 3.155273 4.263093 3.434225 2.515029 4.397736999  
7.659398 3.899558 2.222359 4.166651 7.667446469 3.432528 3.848131 5.121741  
6.806735569 4.688947 4.922793 4.944185 3.508236 4.010963 1.991235 3.227057  
7.96507987 8.665315867 5.371597704 3.118022 3.65493207 2.942297528  
3.514047 4.105532 4.300934137 3.309148 3.090584 4.03314 3.996070353 5.313819  
3.846981 2.782883 3.769904906 3.157007 6.853335 2.596043 3.77791 6.731065  
4.773606 2.546245 1.882094 10.77848 4.555874 4.776569 2.92432042 3.651082  
1.913906 4.456011 2.90278 2.38231 3.466664 4.114398 1.74395689 2.064454727  
2.785917475 2.571848 3.544549 3.104893 6.625523 4.96863 3.768373446 4.211298  
8.006203 2.640623 1.164514 2.645688 1.474133013 4.792787 8.207373 3.196241  
5.075556 2.782213 5.53192 7.980597 2.516732961 3.005613 2.961743 2.058999234  
2.769974 2.987362 4.007943 3.733761 3.697697 4.498748135 4.802007645 5.410280866  
1.553698 3.354183 3.875309 2.504968 6.106596 3.352155 3.597665976 5.895342  
5.453456165 1.015338 3.656233 3.688485 3.212214 4.726378 4.062340449 5.221781

3.589534 3.706944 2.708136 7.559988 6.147923 3.263957 3.452003046 6.253474  
2.641112124 3.655063 1.848839 2.218430405 8.286949 2.043614 5.161374 3.823813414  
4.203267 6.029127 4.318338 4.424397681 1.598746 1.985366 1.911809 1.342077  
6.046821 3.73393 1.759352  
AC009704.2 0.09818942 0.401316435 0.135259 0.432874909 0.651908151 0.844081809  
0.2136585 0.268948961 0.0661021 0.03913108 0 0.6540427 0.1760367  
1.227331 0.5214541 2.064648 0.5474372 0.492426682 0.1955741 0.2918484  
0.206854823 0.9212544 1.087444059 0.7134173 0.5862697 0.303464114  
0.5591457 0.5265264 0.1054475 0.9124544 0.03524127 0.292120968  
0.8694778 1.18556067 0.3649358 2.306597473 1.400516391 1.454981824  
0.8804264 1.839256 1.337436205 0.9862566 0.407267146 0.08293387  
0.199732002 0.8203232 0.5512861 2.473601 0.487944371 0.2188647  
0.6261783 2.761581 0.469608911 1.051426 0.310271689 0.7006363 0.6630508  
1.104237 0.07643973 1.086196 0.8151431 0.9134487 0.785320504 0.4674572  
0.2006596 0.5756101 0.2660651 0.9865668 0.9811761 0 0.6318222  
1.037467485 0.1650705 0.2377329 0.303383826 0.5318194 0.155511199  
0.2249839 0.06095899 0.3879349 0.1161595 0.05205605 0.6400623  
0.401174454 0.637905915 0.08470815 0.2577702 0.246787 0.594511739  
0.3140912 0.5104002 0.2799302 1.335496932 1.625442 0.4321257  
0.463070413 2.003145 0.48603581 0.23727564 0.2510167 0.108027342  
0.08356072 0.36573 0.886135856 1.183996 0.968061 0.342516398 0.8852102  
2.04213155 0.56218839 0.2179511 0.966394249 0.6575096 3.797571  
3.068595 0.4983686 0.3274811 1.470160872 0.2009596 0.5257204  
0.08606643 0.09226079 0.1731698 0.5511523 3.96445 1.048832 1.006911  
1.183569 2.512375 2.427587625 2.121558356 0.6069472 0.885630699 0.447783929  
0.2092673 1.03693818 0.4967549 0.07356102 0.224278877 2.492103001  
0.102348952 1.069790687 0.4422535 0.7402795 1.246186 1.748631 1.931246  
0.9707941 0.690420448 1.088907 0.7562064 0.723135478 0.8891987  
0.5748526 0.338284466 0.8780969 0.3231076 0.190978285 0.7581778  
0.5556846 0.234536224 0.7015552 1.209325 0.3446627 1.282715914  
0.9567785 0.3287966 0.063642841 0.02411613 0.838111686 0.5239023  
0.08519664 1.750448819 1.162385 0.702532434 1.689868 3.380509 0.095817  
0.4913643 0.4351899 0.616243192 0.3739702 0.310723 0.7287196  
1.390883 0.4424245 0.02844061 0.6262133 0.3856396 1.865373384 0  
2.554605 0.1839222 0.75425 0.512242 0.640866995 0.5309347 1.938659103  
0.6712204 1.866303 0.372516887 0.555934662 0.03744798 0.2239982  
0.461275089 0.5231779 0.3544763 0.27824 0.9440154 1.229638 1.465171  
0.3521126 0.3507626 0.05005336 1.623119 1.178285 0.03255397 0.03374559  
0.78880284 2.443415 1.088528 0.159903049 0.7935747 0.2497675 0.2013944  
1.212604 0.4847621 1.829954773 0.6648353 0.858345 0.3395877 0  
1.326926 0.140953462 0.1302072 3.324104 0.3959844 1.900547441 0.103184618  
2.880045 0.2838669 1.076008 0.298228981 1.297681 2.275667 0.784899237  
0.1507401 1.417442 0.100964 1.874998 0.3686127 0.6880247 1.129065212  
0.6092278 0.0945546 0.2844387 1.335009 1.906699 0.227563 0.7361886

1.148891 0.4308543 0.380055386 2.091665 0.7743694 0.031278612 1.684723  
0.1805125 1.040903 0.2088031 0.4678813 1.857862 0.4260615 2.417526  
0.552437575 0 0.153361793 1.607547 0.3596342 0.2229925 1.234023271  
0.301863957 3.122324 0.8226282 1.667212 0 0.192918 0.180886465 0.3243482  
45.06021 0.1309323 1.505723115 0.03028747 0 0.167351919 0.1689012  
0.501711026 0.1425096 1.200269 0.713454658 0.9584788 0.5580525 0  
0.538458215 0.5045615 0.5322879 1.391531 1.226959 1.641529 0.9057693  
0.9732877 0.5165285 0.5180213 1.007191739 0.1136159 0.258422489  
0.1179179 0.034314435 0.3571028 0.0704622 0.362462224 0.3091318  
0.3849725 0 0.463086354 0.4991572 0.1033532 0.030933573 0.662950681  
0.1634476 0.2496783 0.5643734 0.488101241 0.965328487 1.530366898 0  
0.1222798 0.8017019 0.1637805 0.3070557 0.1273244 0.1915184  
0.2308455 0.4005467 0.3241038 0.1472484 0.107312297 0.4196135  
0.2353468 1.446642 0.833909 28.18253 3.925583 0.3130591 0.2177995  
0.7796455 1.122482 1.208944087 6.244874 0.4067858 0.590431 0.9092165  
0.698848601 0.657078 8.741656 1.188113 0.2492725 2.092578 0.03398905  
0.2159647 0.277074926 0.3651281 0.1641471 0.251601588 0.3003589  
1.567724 1.069918 0.3731909 0.9233666 0.467228666 0.581221179 0.6354042  
0.7035961 0.2318244 0.045722849 0.75136378 0.42768223 0.8075198  
0.2666871 0.6253635 0.4839784 0.470285 0.1401716 0 0.975996246  
0.763270828 0.1365987 0.638418214 38.78664 0.29930629 2.035201 0.2711506  
0.3820849 1.399373 1.417444 0.2550004 1.323465 0.1875257 0.9596429  
0.695005883 4.850223 1.021582 0.09729068 0.6781839 0.523350717 0.3879364  
0.7237708 0.2079654 0.233714529 0.1467683 0.5059367 0.09597807  
0.1499641 0.7937449 0.4930501 0.5650978 1.227207325 1.06484536  
2.435569145 0.2286281 0.14801195 0.459855131 0.571963 1.254799 1.434022484  
0.7872032 0.1113106 0.2994348 0.805281258 0.06316704 0.09197728  
0.03423499 0.388065417 0.1723883 0.9802716 0.1181307 0.2742984  
0.9003907 0.3045429 1.060347 0.2182138 1.051498 0.09770235 0.9258268  
0.279669717 0.05479062 0.09417939 0.1978041 1.451773 0.4455983  
0.2005735 0.1668849 0.101796184 0.157131889 0.436654805 0.1669289  
0.6481533 0.2034886 0.3564209 1.80582 0.36243908 0.187203 2.606256  
0.1420527 0.2933386 0.1572506 0.09824189 0.7200894 1.423469  
0.6512577 0.5081821 0.4747582 3.019775 0.9750724 1.192858475  
0.1898419 0.7111348 0.105404589 0.3488753 0.2412628 0.6262579  
0.5774394 2.116358 0.726648111 0.856463355 0.605172194 0 1.774314  
0.4273578 0.2208486 0.3104193 0.4307469 0.26121161 0.2568218  
0.703609579 0 0.561188 0.2587167 1.784504 0.02645699 1.053391776  
0.8593656 0.8956657 1.069593 0.256101 0.1066433 0.6695628 0.5422335  
0.653686699 0.9474757 0.727796856 0.09280682 0.1862874 1.014150954  
8.96132 0.1530679 0.09838889 1.136523865 0.1875214 0.9363144 1.05431  
0.10678824 0.4571425 0.07779478 0.1966454 0.1651022 1.447721  
0.7182527 0.1630373  
AL391244.3 0.5605114 1.896358495 0.5469199 1.812105888 1.535815132

0.695993391 1.005093 1.023524739 0.2725247 0.2978381 1.426003778  
1.791366 0.7443706 3.347399 1.343652 1.423428 0.5902833 0.7496008  
0.6615877 0.9718378 0.579478728 0.9182299 1.207041485 1.762874  
1.344402 1.138837257 0.8866295 0.2671698 1.50486 1.024864 0.458229  
0.514680192 1.456272 2.443905267 0.5997163 1.334399083 2.230873889  
1.18523895 1.052429 1.74989 1.474888052 2.208999 0.301372339 0.7802754  
0.738995294 2.640574 2.25694 1.522797 0.580294972 0.3609327 1.173454  
2.836398 1.65064603 1.222637 0.578092384 2.11088 0.3995284 2.642377  
0.7030146 0.4697362 0.2423552 2.787004 3.719211904 0.4582213  
0.4454564 0.9779324 0.4050199 1.399256 2.48934 0.3854216 0.5844252  
1.294143616 0.3559801 0.8670305 0.798578738 0.607175 0.526062836 1.57991  
0.579971 1.511494 0.3868043 0.4127228 0.8119503 0.890591483 2.629948286  
0.6178745 0.535907 3.541507 1.215047192 0.7869192 0.3147412 0.5149024  
1.181441958 0.7847733 1.399798 1.059467403 0.4325254 1.20229239  
0.730989694 0.2918913 0.388274241 0.3577529 1.430501 0.605288212  
2.019523 0.3306242 0.665326297 1.037862 3.265164538 0.525488875 0.7208272  
3.107068991 0.5676399 4.188104 1.058531 0.4741537 0.675067 1.55899918  
1.672959 1.667255 0.6914701 0.4681493 0.4027362 1.144881 0.8643764  
0.570212 1.516813 1.58381 2.841804 2.257143529 2.54265314 0.9320354  
1.286072765 1.289004357 0.4361224 1.601364806 1.30879 0.3849275  
0.082981712 1.908742377 0.551797269 0.853316597 0.5259564 0.373498  
1.373833 1.34892 1.576543 0.866611 1.410089699 0.5919992 1.470208 2.446220606  
2.092722 1.070064 0.370612612 1.429516 0.8197557 0.702569361 1.150708  
2.951823 0.715909118 1.385501 1.917609 0.3096986 1.418574052 1.267904  
1.610448 0.605505423 0.1529624 0.863838358 3.275508 0.4052854 0.520436708  
0.6790655 3.643422041 1.60776 3.198388 0.5064523 0.4674897 0.5095936  
1.804887315 0.7439447 0.3045838 2.79636 2.219733 0.6235968 0.6945074  
1.799772 1.367544 1.035263856 0.064953791 1.767622 0.6649458 2.671075  
0.812255 1.016213916 1.607256 1.403052997 1.011128 2.367497 0.854770219  
0.987322439 0.6056836 0.2486336 0.816771895 0.4084164 0.6438465  
1.279484 0.9067011 0.7230584 1.499586 0.809593 0.8104619 0.6984465  
1.40615 2.892544 0.2581019 0.3424635 0.970615939 1.048391 0.3945288  
0.925479579 0.831612 0.4464596 2.235438 1.087381 0.5697279 2.098176842  
1.839028 0.5353525 1.467357 0.0427481 1.30921 0.547594482 0.6469324  
2.252148 0.6375671 0.929641115 0.229065787 1.037216 0.5401486 0.9136483  
1.288645859 1.258837 1.391848 0.8089925 1.971968 1.261164 0.3628872  
2.703716 0.3825844 0.6545947 1.408403211 0.5228003 0.419814972  
0.6730763 3.810428 1.327358 0.5629159 1.418796 0.2995817 0.4645758  
1.196025604 1.74128 1.420864 0.615015962 0.9617191 0.4170869 0.910646  
0.5098881 0.8779302 0.6714107 0.6141817 1.847913 1.49592584  
0.1935305 0.88518856 2.107228 1.606252 0.7543383 1.21754802 1.094083417  
1.22922 1.428008 1.77745 0.3971446 0.9891004 0.846146026 0.4589268  
2.089372 0.4463776 1.018711161 0.4514483 0.9489869 0.663419049  
0.1714075 0.838950198 0.5694582 1.205392 0.967902976 1.176655 0.3960964

0 1.508425459 0.6000572 0.4782903 1.302392 1.00058 1.448187 1.887664  
1.940185 2.052448 0.4243999 1.232040847 0.5164561 0.327821568 0.5609425  
0.533236864 1.664784 0.5474816 0.881285368 2.70147 0.3773664 1.511217  
0.694256365 0.3896648 0.5899885 0.372787134 1.226436995 0.4665178  
0.6774485 0.8617739 2.452906573 1.425745173 3.060315115 0.4145441  
0.3490152 0.1355997 0.5045687 0.4503769 0.686448 0.5223434  
0.3242143 1.143254 0.6081469 0.6164128 0.510490869 0.7363487  
0.9489589 0.879963 0.1586782 2.122711 0.6384351 0.6354092 0.5821812  
1.190485 1.151005 1.950835405 2.134008 0.483776 1.132848 0.4852659 1.403662424  
1.090008 5.656496 1.430108 1.156159 2.063488 0.3018174 0.471823 1.131336218  
0.405285 0.5466001 0.833385517 0.3129807 1.151373 2.096456 0.7495672  
0.8115683 0.477454726 0.880672844 1.559054 1.701416 1.216424 0.594517122  
1.279216504 1.205635176 0.8323074 0.7400435 0.5178514 0.4840762  
1.260952 0.2667219 1.064175 2.261911599 2.159934236 0.7364491 1.268788083  
3.413723 0.797337807 1.50211 2.536763 0.6617928 2.629887 1.066781 0.3822951  
2.463094 0.386564 0.511842 1.273492943 1.594461 0.3489033 0.7199383  
0.6721168 1.916245231 0.4989512 0.5594907 1.494948 1.028409148  
0.6795673 0.5946139 0.5174497 0.4993716 0.7745417 0.4762011  
1.508381 2.698405706 2.997106198 2.180921365 0.2589517 0.821451744  
0.347765588 0.9906726 0.2142772 1.460549619 1.17599 0.5118606  
0.7407029 1.608923401 0.6510601 0.2479401 0.510288 0.957211041  
0.519372 0.9755219 0.4121 1.23029 0.45428 1.86725 0.6271082 0.6747361  
2.081308 0.9605366 0.8074389 0.376948136 0.8861834 3.748408 0.9723312  
1.227763 0.4946053 0.2544373 0.4057615 0.330904438 0.488357245  
0.450058359 0.2964604 1.908712 0.3411072 1.657837 1.223836 2.503201488  
1.282371 2.668546 0.4655186 0.4837487 0.8976605 0.373873928 0.5233414  
1.873456 0.8579274 0.8273058 1.094095 1.641742 2.06623 0.62149258  
0.501716 1.367259 1.047401873 0.4646936 1.65269 1.266137 1.365133 0.9254093  
1.255937069 1.666737093 0.687722768 0.1473239 0.9350769 0.4658881  
0.2714023 1.181346 0.5464236 1.325438821 0.6864883 1.47272923  
0.2229829 0.9534301 0.6563895 0.9321242 0.4446963 1.416455736  
0.8370774 0.6589935 0.8254053 0.5888389 3.167859 1.228558 1.303294  
0.955421268 1.05686 0.321487416 0.4611092 0.2067753 1.286500094  
2.718939 1.614072 0.4992445 0.686541008 0.3653157 1.892993 1.616078  
1.332083372 0.6572286 0.7278129 0.2049089 0.3246323 1.141611  
1.653915 0.5773748  
AL034397.3 0.209038 0.971849106 0.6569006 1.22106499 0.755890195 0.681357718  
0.5591026 0.876751386 0.9674944 0.2395081 0.209620921 0.4984188  
0.3747691 1.203799 0.7632192 1.106833 0.3690602 0.567850713 0.3729917  
0.5242416 0.431203979 0.4903205 2.387434001 0.8938844 0.6840683  
0.955619362 0.7142277 0.3222689 0.1683674 0.2731707 0.1219173  
0.397327437 1.424443 1.554946101 0.7592639 1.308587148 1.262095706  
1.822087107 1.06334 1.377725 1.650141049 1.796199 0.234823729 0.3236934  
0.646680502 0.3492814 1.773808 0.7550677 0.081156037 0.4310006

0.7725845 0.3507478 1.624613969 0.4929827 0.340593695 2.633611  
0.3176068 1.362417 0.2169793 0.420442 0.1084612 1.190269 0.961336141  
0.667224 0.1423964 0.6455395 0.2053319 1.859665 1.784227 0.3557558  
0.434356 1.030722517 0.3514229 0.1054408 0.548999359 0.2434239  
0.289687804 0.5046333 0.07299965 0.3097067 0.3245746 0.193941  
0.9112689 0.533794108 1.893441015 0.05635542 0.1524371 1.559755  
1.081094213 0.2674708 1.350709 0.3501209 2.272668397 0.4131876  
1.503155 0.809799169 1.973487 0.646708805 0.369836246 0.3673971 0.182069222  
0.4113811 0.4325622 0.308373024 2.495093 0.4161493 0.330415096  
0.9279965 1.947338392 0.566932389 0.0911432 1.622848319 0.2624605  
0.5826845 1.690508 0.1878836 1.394366 1.687191852 1.377072 2.015867  
0.3359199 0.1800483 0.5837204 0.5573471 1.030276 0.4784754  
0.4465915 1.290594 3.097765 2.18765588 1.083205799 0.391044 1.079167395  
1.613274688 0.1511567 2.051595044 0.6406339 0.1761817 0.447630982  
2.82793263 0.830718226 1.466575062 0.1863434 1.799864 0.4026933  
0.2515342 1.732151 0.1817973 1.800570881 0.6209468 1.933639  
14.214731864 2.030034 0.5586997 0.785653599 0.607556 0.9114306 0.447236421  
0.7061705 0.8749353 0.335474024 1.111683 0.7240956 0.2445871  
4.087457574 2.209684 0.8458134 0.186299951 0.2182011 0.457221094  
1.573439 0.6461567 0.446412671 0.5698164 1.792567688 1.944292 2.031612  
0.1614899 0.8744558 0.1959876 0.742787248 0.4614079 0.2931675  
2.036199 1.528303 0.1569815 0.1589384 1.510222 0.8583162 2.091993126  
0.13080942 2.00856 0.5481794 0.1449628 0.2839909 1.064199369  
0.9633414 1.203784468 1.509358 0.3797932 0.379036385 2.958858863  
0.6975847 0.1390887 1.370736745 1.467226 0.7289269 0.4350087  
1.026402 0.6749038 1.417837 1.061964 0.5200563 0.1132199 1.654004  
1.381987 0.1992518 0.1796046 1.259476932 0.5431342 2.413953 0.553185258  
1.689461 0.5075666 1.125478 0.7232771 0.1593564 0.945864417 1.208975  
0.4111544 1.54758 0.07174145 1.216288 0.553271461 0.5659531 0.6567456  
0.2593912 2.203080305 0.082377141 0.7794155 0.3021658 0.7574223  
0.892838415 0.964902 1.420255 1.923381527 0.7722003 0.5238939 0.09851643  
0.05457446 0.4815505 0.5607259 2.804311832 0.3433237 0.213880942  
0.3726455 3.312003 2.908282 0.254344 1.069977 0.4076506 0.6191483  
0.746870444 2.723486 0.7359709 0.191445785 0.7580874 0.2127362 1.58559  
0.5334315 1.120595 0.505904 0.4019895 0.7340692 1.54928361 0.4364365  
0.685641285 0.4135338 0.8374127 0.1087933 2.207530518 0.82625903  
1.117416 0.6797865 3.096259 0.6152333 0.6246184 0.264752008 0.398373  
5.259691 0.4181176 0.761323473 0.4674783 0.2719116 0.653179612  
0.458462 0.66756591 0.3261467 0.692056 1.202456087 0.2386104 1.661859  
0.63736958 1.182160536 0.4531671 0.5351229 0.8760951 3.708255  
0.9928107 2.737519 0.980527 2.401443 0.6203412 1.809199376 0.4232895  
0.739280533 0.1359792 0.483975335 0.3706196 0.2812665 0.707350522  
0.9963185 0.484296 0.4683936 0.414516215 0.3576289 0.3025429  
0.21402965 0.76449354 0.4262605 1.100006 0.1780013 2.078262472

0.322946257 2.172024865 0.159432 0.08677486 0.6684824 0.2116964  
0.5822004 0.7793093 0.2548302 0.2896061 1.218192 0.3953084  
0.7366799 0.685379697 1.191101 0.2236767 1.274833 0.7101321 1.546837  
0.8571563 0.5553996 0.5713188 0.6454806 0.8861735 1.722142909  
1.095023 0.3924139 1.4691 0.3717873 3.192563734 0.9011952 3.922358  
1.552134 0.5638503 2.584215 0.1447203 0.4661584 4.129103356 0.3678439  
0.2402516 0.386851881 0.3311395 2.020107 1.04737 1.166915 1.270736  
0.849635379 3.926952314 1.441724 1.146833 0.1850764 0.243351361 0.957653827  
10.698417959 0.6625889 0.5766281 0.5732212 0.277403 0.6826376  
0.1771839 0.2089928 2.527352517 2.296799833 0.3513936 1.211904195  
3.835139 0.254880332 0.3643483 1.419096 0.351965 3.489481 1.90854 0.5058626  
3.114144 0.3618006 0.4178881 1.57209182 1.306461 0.4182446 0.44877  
0.3158319 0.759664603 0.3039725 0.3611377 1.463511 0.62972545  
0.7342784 0.2613555 0.3064953 0.1795851 1.437975 0.6679699  
1.591537 0.805561877 0.85897159 2.554446706 0.269441 0.83700146 0.272989651  
0.3980833 0.5394119 1.475092232 1.245897 0.5776192 0.5020111  
0.889336649 0.2941705 0.07342979 0.3279769 0.413081204 0.3440642  
0.4947452 0.652306 1.491186 0.3049558 1.229162 0.2745485 0.3774557  
1.939444 0.6760033 3.743562 0.725638906 0.07290322 0.162907 0.1228238  
1.476015 0.6225487 0.2211281 0.2442588 0.17608216 0.334522105  
0.51321976 0.3820326 3.067747 0.1469826 3.098407 1.316594 1.639662415  
0.3487236 1.714098 0.4914317 0.3903101 0.3180362 0.209149676  
0.5110056 1.448939 0.2999595 0.9015682 0.3874446 2.487363 0.719473  
1.190393891 0.1683997 1.892441 0.271148224 0.179493 1.900433 0.6180199  
1.033751 0.6655955 1.227915201 2.921498815 0.308671162 0.1521504  
1.770648 0.5473094 0.2718172 0.9293338 0.4814398 1.151921614  
0.3026677 1.460484149 0.2702687 0.9600489 0.3327681 0.3631469  
0.07040621 0.661564858 0.9637678 0.2669528 0.9392968 0.5367009  
0.3500133 1.756357 1.458158 0.907598061 1.19983 0.408107576 0.02469735  
0.2602635 3.030383628 1.951157 2.556044 0.5891137 0.784921578 0.399219  
0.7890319 1.365433 0.596778575 0.6244843 0.2277265 0.1719428  
0.1230216 1.134959 0.482001 1.323297  
AC005856.1 0.05527446 1.219945834 0.1713202 0.804148388 0.86503197  
1.520527789 0.1202763 0.170326505 0 0.462595 0.332571653 0.1004141  
0.6936831 0.1776626 0.1100797 0.6569335 0.4930763 0.498969414  
0.4403837 0.4928768 0.17466937 2.000346 0.229560962 0.6024136  
0.07616145 0.683324788 0.5193603 0 0.1187206 0.5136544 0.4761268  
0.38370668 0.9177399 0.071506719 0.5602797 0.556486803 0.430037773  
0.096360376 0.4574997 0.8628212 0.205334293 0.3643502 0.515847984  
0.0933731 1.011928921 0.9697598 0.5924661 0.2457321 0.360520087  
0.3696211 0.9132928 0.2119904 1.057441045 0.8455525 0.654987875  
0.5916212 0.1679651 1.864847 0.6024306 0.2501427 0 0.3191674  
0.618920425 0.2870716 0.3388761 0.4166129 0 0.2776875 0.7180425  
0.2052437 1.067028 1.868892476 0.278773 0.401486 0.307414799 0.7903655



0.175086036 0.325676 0.1029482 0.280778 0.4904287 0.6153898 0.3783305  
0.86228279 0 0.07152804 0.1934779 0 0.613566603 0.9017493  
0.1436616 0.614574 0.178058065 0.655538 0.1563811 0.167579678 0.7917503  
0.492493628 0.629693045 0.07065329 0.364875567 0.1411183 0.06862765  
0.115116627 0.4863761 0.2515188 0.216917072 0.1812064 0.071849471  
0.199880009 0.1577478 0.337667052 0.6168942 0.288891 0.5455029  
0.07013754 0.6636645 0.38794127 0.8484571 0.766773 0.4844999  
0.7790553 0.4386765 0.4188565 0.4184505 0.4217331 0.1417069  
0.6825257 0.4242926 1.024934286 0.749911707 0.05394838 0.236157321  
1.279761171 0.6058507 0.685249357 0.3871963 0.4348074 0.883784247  
0.238227817 0.086424027 0.273738558 0.4356815 0.3977885 0 0.1596275  
0.3019917 0.6072178 0.373116729 0.5254166 0.4442052 0.32566381 0  
0.4220946 0.363553649 0.09886266 0.6548013 0.322526265 0.365834 1.01665  
0.297065549 0.6462515 0 0.1940234 0.277726281 0.1731234 0.1233945  
0.698624817 0.2443655 1.132329915 0 0.2877621 0.307935162 0.8265469  
0.488536026 0.1678745 0.6184796 0.4315115 0.3630469 0.1696047  
0.428531105 0.11483 0.4770477 2.830541 1.136583 0 0.1440925 0.528778  
0.5328593 1.068839382 0.207534176 0.9805103 0.06212198 0.1415318  
0.36045 1.125595486 0.163027 0.713570463 0.2833911 0.7416079 0.222039066  
2.190693581 0.442698 0.4413392 0.324586055 0.1359306 0.8163322 0  
0.7743567 0.3028414 0.731072 0.0991086 0.3384982 0.08453067  
0.06685711 0.07370002 0.2748875 0.7408691 0.4262845 0.4854666  
0.6127726 0.270046058 0.1748084 0.1917319 0.8162809 0.2824632  
0.7223573 0.356590165 0.1871302 0.3865554 0.3584372 0 0.1659946  
0.238043784 0.2931939 0.08505732 0.2572088 0.707214495 0 0.4121909  
0.4793976 0.2930926 1.385044208 0.3867421 0.6405287 0.276155545  
0.7637146 0.1994827 0.4546912 0 0.6791096 0.2178645 0.381355593  
0.4841744 0.319369732 0.2586572 0.7272831 0.4712274 0.384311  
0.5738232 0.388052 0.2910526 0.09874489 0.3153953 0.1868234  
0.686707705 0.1034611 1.262956 0.06061687 0.4936806 0.1316938  
0.4378016 0.4578875 0.5757716 0.861196392 0.9017606 0.725197513  
0.5429688 1.113483 1.192542 0.173669359 0.072827318 6.72764 0.07311914  
0.4792521 0.3253638 0.7059044 0.229112314 0.6741698 6.593345  
0.1658399 0.932390083 0.818397 0.3081415 0.565251587 0.9698235  
0.462161015 0.04813436 0.9009014 0.334691725 0.3655106 0.4487835 0  
0.303118086 0 0.8989338 0.5731788 0.07400364 0.3024254 0.3277872  
0.3130856 0.3078773 0.6561301 1.032723697 0.06395858 0.818300232  
0.1327607 0.115901205 0.4221555 0.4759894 0.612130259 0.1160145  
0.4728334 0 0 0.3890688 0.174544 0.626891577 0.186599755 0  
0.2811064 0.1059022 0.317042629 0.186315149 0.574333498 0 0.757194  
0.09026154 0.1185404 0.1944597 0.1290161 0.2587507 0.1670805 0  
0.3192876 0.3481446 1.359226562 0.8031344 0.2271178 1.602037  
0.6759912 7.585449 2.039867 0.6696837 0.8407367 0.3413599 0.06318869  
0.120098724 0.4087757 0.2576192 0.448707 0.7115709 0.655679632

0.08536005 0.4634128 0.3648179 0.2631089 1.104365 0.2870055  
1.134695 0.40943633 0.264271 1.24746 0.519331482 0.652178 0.2786937  
0.7098494 0 1.113851 0.087673444 0.27265912 0.2823889 0.2970603  
0.07118321 0.077217259 1.202126739 0.160505452 0.1136457 0.2814901  
0.8801008 0.7544752 0.5776164 0.1775426 0.3617183 0.50716104  
0.396621635 0.3844824 0.646900694 7.211373 0 0.2499687 0.2289611  
1.042358 0.875288 0.250098 0.3131982 0.5293616 0.5542171 0.1473323  
0.260829714 0.3995664 0.1990683 0.05476853 0.5726623 0.482094844  
0.3639729 0.152789 0.5463333 0.542712104 0.6444465 0.150782 0.2431333  
0.5065222 0.6186855 0.1513943 0.1590573 0.207252146 0.449580689  
0.645210419 0.2206341 1.562276481 0.119478229 0.07430289 0.08150455  
0.558875358 0.2798816 0.3289695 0.6573954 0 0.1600158 0.5436629  
0.2312658 0 0.1455656 0.114172 0.7481266 0.06617688 0.6220595  
0.342877 0.4355818 0.2763914 0.6123387 0.1100005 0.9555007  
0.35423201 0.09253101 0 0.1670269 0.2514636 0.09406642 0.5806813  
0.5636742 0.644679506 0.053073219 0.368713761 0.1127645 0.234559  
0.4418405 0.9028915 1.253297 0.204030391 1.011682 0.6287819 0.3598502  
0.09907872 0.1062267 1.078428016 0.2026825 0.3605956 0.2961138  
0.5149342 0.1069036 0.6314075 0.2994024 0.215840651 0.4274761  
0.5254255 0.593361498 0.3142317 0.7334052 1.542379 1.152493 0.1624604  
0.306792865 0.657456771 0.340673858 0.0603481 0.5728569 0.1804317  
0.419593 0.2621198 0.1939867 0.819254596 1.610973 0.712958238 1.187423  
0.4061745 0.0728206 0.2659138 0 0 1.036647 0.5445397 0.1204227  
0.8650124 0 1.292303 0.6747485 0.719969616 1.048346 0.482865222  
0.1044888 0.3146042 0.489345565 0.7206656 0.1938771 0.5815609  
0.59409202 0.09048233 0.8565148 0.5341592 0.240460232 0.2573424  
0.7225939 0.04744242 0.05576529 0.3964747 0.316433 0.04588988  
PCAT19 0.8181019 5.614452057 2.872069 3.192162679 1.366590156 3.365939204  
2.714547 2.700724669 3.214104 2.963514 0.734671675 0.4103688 3.130453  
1.521903 0.2188557 1.975875 3.208709 1.473755467 2.136184 4.014934 3.927152661  
5.257661 1.462180389 2.177287 0.9870398 3.019014768 3.761752 1.067273  
0.4895544 1.309627 1.064941 3.285583711 1.804337 2.385238791 3.10661  
1.752560909 4.171997502 2.501176954 2.109723 2.778563 2.714018182 1.973854  
3.059877546 0.350654 5.054520695 1.423073 1.726363 3.872242 3.83036017  
2.732608 4.357138 0.3512251 2.973474395 3.499159 2.710543539 2.363362  
0.9770866 1.506346 2.591905 3.026916 0.8933073 3.345122 0.468765977  
3.276489 2.474535 1.104389 1.280462 2.324215 2.424041 1.138528 2.193443 5.493199791  
2.311404 1.251525 1.935431022 4.3464 0.241735032 0.6474949 1.641208  
1.026869 1.783979 3.897046 2.431652 3.941198154 1.281446505 1.580099 2.361411  
0.1841372 2.049539934 3.363 1.124856 2.057335 2.705315099 1.828257  
2.732939 0.575857388 1.637724 4.823242183 2.297309589 2.403594 3.461464154  
2.301674 0.616518 7.340789302 1.977757 1.268668 1.08082487 2.565233 2.333183931  
2.089991485 2.303806 1.682481439 4.587952 1.774136 3.079573 2.386049 3.942117  
2.359569875 2.611518 3.117278 2.704268 2.638839 2.612884 1.288538 3.065872

0.7204644 0.3791256 3.417549 1.364276 2.044590846 2.816223522 2.800621  
6.700771445 3.486723149 2.197145 2.074410314 2.038563 1.097733 4.620525984  
1.672338011 0.35637673 1.443230868 1.049526 1.71145 0.9999331 1.004987  
4.420773 2.655937 2.558573037 1.566916 1.811274 1.876465816 0.4655894  
3.294598 2.026903857 3.436063 4.110463 3.472156339 2.841995 1.911847 1.647882666  
1.399851 1.847614 2.093045 1.218849405 2.813062 1.721837 3.68414869 3.130949  
2.402374645 0.2326806 1.456777 3.342285749 2.057935 3.9570915 1.891312  
1.664035 2.673033 3.662437 1.648537 1.410962462 2.316823 0.8957541 5.11555  
2.717227 0.7335771 1.743628 3.956952 4.555889 3.086042701 0.947475802  
2.989092 1.994429 3.371437 2.303836 2.767040604 0.5702167 4.91132476  
2.395604 0.3003474 3.56156226 5.553764373 4.582383 2.10774 0.793514291  
1.781656 3.386251 5.505869 2.441801 0.5479394 2.099479 1.42674 4.087775  
0.4606095 1.944605 2.908836 1.61122 1.817075 2.534713539 1.694434 3.46793  
0.611462424 1.132744 1.530419 4.397843 1.929135 2.273032 3.343476544 2.246044  
2.28425 2.982486 0.6369732 1.772347 4.224357834 2.27229 0.3695307  
2.450795 2.539708489 2.091560707 1.757372 3.152348 2.011442 4.023902895  
1.404911 2.338066 2.057884954 2.071376 1.610893 2.067475 0.2113084 3.404611  
2.507984 1.708277991 3.052736 2.680929643 3.21883 3.80232 3.597133 1.644166  
6.147916 1.333471 3.745204 0.694392171 4.027088 2.792634 3.438489046 2.921656  
3.639762 1.977352 3.149674 1.658244 3.196906 3.415024 2.405077 2.515444387  
3.334305 5.401051713 0.972889 2.265955 2.639022 1.551637053 4.563632777  
1.178231 1.938297 2.152686 16.51925 3.922458 1.850162556 3.26091 1.972359  
1.123476 1.84125436 3.996191 2.768196 2.740150694 3.780708 3.040140529  
1.719031 2.757184 2.908129847 1.553353 3.387252 4.70593392 2.594726716  
1.098045 2.099801 2.751849 2.68105 1.332442 1.593025 2.282365 0.5743238  
4.584502 3.399661097 2.806932 2.591003155 1.090012 1.322837389 1.953952  
3.890515 3.65478854 0.3801536 3.586181 2.066024 2.010334995 2.45906  
3.003229 3.335163261 2.699979302 0.5000132 1.918143 1.089142 2.18981442  
1.708064751 1.924253813 1.828706 4.171586 1.302704 2.720468 3.446135 2.001366  
1.343252 2.817396 3.493852 1.400577 2.281584 2.782424962 2.63691 1.149769  
2.704385 5.848786 1.872811 1.539617 2.174938 4.790132 1.271173 1.265596 1.494555022  
3.557864 1.89699 4.130091 2.909403 3.799734368 0.8171181 2.101039 1.067825  
0.8524619 3.431721 2.299354 3.879283 3.182875024 1.128663 3.296656 2.405718855  
1.728843 1.775129 3.235992 0.6149146 2.463848 2.301518208 1.232750567  
1.172772 1.810087 0.8150698 1.90478516 2.449028882 0.750499361 1.100438  
1.61261 4.653114 3.407441 4.136337 1.930509 3.031983 1.428447013 1.818036375  
3.080294 3.265630799 2.721439 0.80396567 2.10755 1.832082 2.532898 2.34606  
3.135994 2.081389 1.910009 3.189011 0.3308908 1.037140602 6.016848 2.477284  
1.770445 1.528598 1.774962994 2.46036 0.3037685 3.632148 3.088037462  
3.029761 1.117692 2.846612 5.338273 2.406937 2.112543 4.907432 2.777520265  
2.991870359 2.405211215 2.185152 5.788757267 2.089484738 2.538695 2.544688  
1.412920553 0.7728451 1.678364 4.066238 1.051489161 2.710051 0.5204271  
3.746458 3.769516656 0.3162042 0.7734534 2.030934 1.179257 2.61601  
0.2651029 3.114766 1.187212 3.314102 0.4373966 3.281274 1.56069419

0.4394747 0.7964027 1.475892 2.476599 1.326448 3.449203 2.455795 1.96530979  
1.883689321 4.506965627 2.752598 3.304681 4.750127 1.410955 5.100396 1.998174051  
4.195034 2.444673 2.028548 1.984431 2.577364 2.80991028 0.1492461 2.721643  
1.464014 1.440861 1.279182 1.283949 2.832991 2.097944449 1.695844 3.283117  
6.147524553 1.052806 1.212103 4.338517 1.377413 0.8573371 2.923252593  
3.766462184 1.743453725 0.808764 2.466057 2.089249 1.105423 1.708165 0.8392024  
2.626508298 4.585301 2.006627855 2.482222 2.970944 0.6917207 1.15526  
4.408726 2.850471637 2.778556 6.491325 4.766214 2.460241 0.4597414 7.725744  
2.555249 2.587145194 3.360033 2.117197407 0.3616216 3.15637 1.336830601  
2.69192 2.731517 3.45035 1.786864825 3.914339 2.726558 2.438648 3.91311262  
0.9512659 4.319563 0.9572033 0.8541105 1.109394 1.106782 0.2297802  
PDXDC2P-NPIPB14P 0.6826044 1.071581833 0.2804899 0.950668065 0.790894457  
0.497889538 0.5063644 0.483362516 0.13055 0.1452919 0.417446144  
0.7585909 0.6814296 1.149644 1.287324 1.401759 0.3719242 0.290462477  
0.2626528 0.3198983 0.242396366 0.9305212 1.814785659 1.13423  
0.9868601 0.639289792 0.642702 0.1913373 0.2027027 0.8890237  
0.431524 0.500007513 0.916554 0.933236361 0.3669218 1.249501281 1.13405406  
1.097584713 0.8025326 1.089746 0.816433869 1.361048 0.230578218 1.057007  
0.983534739 1.331737 1.013552 0.4655405 0.36137931 0.1521528 1.01858  
3.468283 0.751247523 0.601208 0.33396454 1.245365 0.3561865 1.242418  
0.1167475 0.7176705 0.2897798 1.239188 1.40209381 0.2652149  
0.1638031 1.149808 0.1660491 1.59123 0.9895692 0.1184107 0.4533795  
1.610037316 0.1121475 0.07825278 0.726200842 0.267204 0.268227568  
0.8455112 0.1565103 2.381669 0.2477652 0.3084282 0.8343108  
0.141175184 1.345130586 0.3078256 0.1719592 1.683961 0.482704508  
0.3200864 0.3516897 0.252102 1.03004193 1.100096 0.8485608 1.092237231  
0.5521791 1.643363866 0.246356847 0.2082157 0.25602162 0.1320243  
0.5938975 0.188471939 1.248813 0.4941518 0.287496131 0.9641966  
1.596459052 0.509573062 0.1598807 1.524251387 0.4847977 4.462228 1.57783  
0.3543357 0.6053741 0.842024179 0.5119885 2.067131 0.2515691  
0.1919308 0.2736048 0.5159548 1.247857 1.148157 0.7733542 0.6773108  
1.270241 1.48627206 1.034838906 0.3053546 1.657041066 0.808171063  
0.4463616 1.296427126 0.540348 0.0958856 0.124024678 1.615850109  
0.169794801 0.701709138 0.6317881 0.6326619 1.066515 1.198459 1.260087  
1.721305 0.920678039 0.4251973 1.540242 1.043519741 1.135025 0.6871153  
0.442163057 1.389688 0.339485 0.546152916 0.9583248 0.7718826 0.61142834  
0.7532377 1.627515 0.3426192 0.937982583 0.7477473 0.8831367  
0.191053434 0.2171871 0.768036008 0.8070615 0.2187397 0.331304791  
0.3963072 2.285268294 0.7224591 2.652765 0.1816668 0.300834 0.2591691  
0.965061099 0.2927471 0.1874484 3.465602 1.307908 1.347559 0.0808841  
1.131632 1.426323 1.460469286 0.116496123 2.164885 0.5521276 4.157709  
0.5867659 0.901175974 0.9837616 1.447091625 0.9995354 3.299967  
0.150604515 0.784673497 0.3165438 0.3598114 0.510163911 0.4387395  
0.3767714 1.107277 0.8800002 0.5868888 0.978589 0.8692671 0.1187567

0.07512916 1.429237 1.347985 0.13373 0.1519545 1.029438023 1.635055  
0.8230722 0.255801725 0.4988072 1.228727 1.030965 1.522802 0.4347691  
2.507640333 3.370119 0.3752066 0.8182265 0.01774762 0.4697751  
0.150325 0.09257619 1.579584 0.3104175 0.824505221 0.13857522 1.4114  
0.2107969 1.165371 0.851097659 1.679446 0.7212421 0.581308777 0.7174761  
1.020231 0.1063475 0.7406151 0.2726694 0.6590335 1.739303353  
0.3963515 0.13072011 0.193591 2.939394 1.660574 0.2696588 0.9305308  
0.5627198 0.4663078 0.568146509 2.006479 1.20164 0.106252125 2.245616  
0.05907842 0.6181453 0.5031048 0.9671765 0.5256388 0.7007076  
3.342188 0.815770184 0.1054561 0.293193433 1.943018 1.287954 0.8015365  
1.429803868 1.492138128 2.891882 0.7319568 1.261035 0.06848924 0.322587  
0.192913018 0.2069566 2.332447 0.173254 0.725598955 0.1938071 0.06630536  
0.409839759 0.07472095 0.252220682 0.3174789 1.485515 1.164819168  
0.5153769 0.7032703 1.70288388 0.779857294 0.1793694 0.1752093  
0.8794367 1.135449 1.160039 1.165322 1.045321 0.9457215 0.2046159  
1.099731804 0.09274726 0.27305227 0.7328115 0.254815832 1.057904  
0.1530772 0.57984174 1.717618 0.1520623 0.3425308 0.182916838  
0.2335643 0.09797758 0.092861434 1.182744568 0.21176 0.3988701  
0.4953883 1.566109695 1.276810338 1.833611828 0.314092 0.1867597  
0.1435563 0.1792906 0.2546995 0.3500358 0.2390503 0.1901813  
0.9809266 0.1536233 0.2000786 0.339102647 0.669611 0.7941509  
0.8355797 0.4453353 4.181443 0.7554137 0.3050201 0.2433413  
0.684347 0.8424125 1.249997101 2.317545 0.3414416 0.8115964 0.2890607  
1.916956725 0.2036411 1.743488 1.198845 0.3003073 2.185213 0.1611061  
0.2767673 0.670339821 0.1895513 0.2593492 0.353356063 0.3627004  
1.870767 1.168221 0.2997308 0.6773469 0.270677778 0.645373522 1.212637  
1.170725 1.158771 0.119197986 1.255869184 0.840907858 0.4438948 0.5214334  
0.4775634 0.4764522 1.242905 0.1605646 0.1861246 1.945361582  
1.145655281 0.2302115 0.891007952 2.937607 0.37358947 1.06991 1.085312  
0.3529245 2.292871 1.316979 0.9449734 1.725115 0.1370327 0.3342569  
0.902878649 1.317706 0.2638399 0.2126424 0.4620918 1.398185439  
0.269009 0.6182283 0.8999475 0.560820261 0.521755 0.3620676 0.2540028  
0.192514 0.9550464 0.368259 0.4613025 2.155481076 2.013664114 1.765622428  
0.1986753 0.380015961 0.156490294 1.084428 0.224944 1.289721739 0.9410069  
0.1780669 0.1963369 1.6158573 0.1946152 0.127157 0.09195405  
0.252066916 0.2893932 0.5954907 0.135317 0.4674378 0.2457218  
1.319213 0.4641108 0.2047092 2.191259 0.7821301 0.7943752 0.185034178  
0.5280654 2.008822 0.4739987 0.5822653 0.3234168 0.2829484  
0.1032727 0.170888221 0.250747954 0.336329186 0.1687964 1.217911  
0.4041814 0.5021315 1.141264 1.555690018 0.1922551 1.68537 0.2899022  
0.1853877 0.3652258 0.166861777 0.4787935 2.56111 0.7103881  
0.7734774 1.125163 2.099321 0.7387854 1.349574793 0.3124442 1.330739  
0.244254534 0.1157554 0.8805501 1.078116 1.476337 0.8283516 1.050502125  
1.40855328 0.366528072 0.1072724 1.861363 0.2532064 0.2159044

0.9073443 0.2994516 1.2057005 0.4289605 0.13710835 0.09874692  
1.016499 0.8720368 0.9184044 0.06270229 1.141736095 0.6206998  
0.3934073 0.5914774 0.7435159 0.5026748 1.386599 1.046098 0.895852282  
1.331808 0.433267682 0.3274803 0.02575391 1.096457415 2.632539 0.7013485  
0.2564967 1.398069347 0.1269772 1.4208 1.438131 0.300889925 0.775243  
0.2243185 0.3173536 0.3312899 0.8253081 1.578887 0.5924703  
AL121672.2 0.291737 0.357713196 0.4521115 0.602879414 0.207527854 0.313488284  
0.2777314 0.374574245 0.2209503 0.1525977 0.146275268 0.2981151  
0.3105515 0.5469905 0.326811 0.2833831 0.1016579 0.402347245  
0.2723827 0.1219401 0.326506142 0.201624 0.681533928 0.3643201  
0.3517306 0.140881552 0.4049453 0.02933244 1.233626 0.2753413  
0.1177961 0.452051864 0.3178746 0.424586607 0.3881246 0.508347806  
0.425573713 0.572160571 0.4716152 0.3984701 0.372538459 0.5150972  
0.434864544 0.6468268 0.500712234 0.6169455 0.3629575 0.4458323  
0.373767076 0.3413986 0.3329835 1.118879 0.632238756 0.6415276  
0.280881767 0.3415299 0.3878503 0.8202174 0.1419469 0.3025564  
0.3689651 0.7545407 0.758327942 0.3787888 0.1863102 0.5268127  
0.1630454 0.5496099 0.4372854 0.2933857 0.263988 0.462373052  
0.4414066 0.1324394 0.321124956 0.2962731 0.360976111 0.1969582  
0.4414781 0.1852423 0.3235585 0.1740005 0.5526905 0.304761342  
0.382709591 0.3539277 0.2393368 0.8249006 0.45999803 0.3149607  
0.1263736 0.3898681 0.509050278 0.4730346 0.6706172 0.073706709  
1.448346 0.270767354 0.169951756 0.4195192 0.260785728 0.2793068  
0.814983 0.341764933 0.3743656 0.6844967 0.238517042 0.3735946  
0.639932659 0.181321369 0.2775295 0.31559731 0.386644 0.2668327  
0.2699201 0.2776379 0.2006813 0.511885598 0.8676379 0.2396253  
0.2237529 0.274122 0.4502014 0.3377477 0.1207811 2.031129 0.4362895  
0.4985395 0.746468 0.829877588 0.288605005 0.4982914 0.311607815  
0.422158818 0.2831263 0.200929198 0.4470398 0.2663724 0.270712624  
0.419119758 0.256580676 0.325076377 0.3079706 0.4498962 0.4793578  
0.2106272 0.3984758 0.4607011 0.292317806 0.2426491 0.4945433  
0.107427739 0.5735825 0.3620179 0.479706314 0.1630607 0.3240021  
0.063835648 0.512885 0.7223258 0.228652529 0.2842413 0.1684267  
0.6080296 0.293166196 0.5710875 0.4884545 0.26591256 0.2686987  
0.396870534 0.4377938 0.4983561 0.487581765 0.3237785 0.184177035  
0.2768865 0.5022025 0.6761343 0.5132546 0.3543375 0.484665926  
0.4734917 0.36194 0.8728246 0.5748901 0.547715 0.1425967 0.6977186  
0.5859199 0.352581388 0.502039615 0.1293776 0.553294 0.3735002  
0.5231722 0.27133732 0.4571149 0.332312074 0.5422021 0.3669548  
0.35401615 0.371649054 0.3129303 0.5199498 0.792334402 0.1345195  
0.5565245 1.240045 0.2103619 0.2426125 0.4081186 0.08173316  
0.1395768 0.6413411 0.7057396 0.4619214 0.4171189 0.1315961  
0.790986378 0.9448401 0.1732605 0.244972577 0.3075445 0.4680293  
0.4263428 0.6755335 0.444801 0.411703293 0.5761394 0.2550285

|             |             |             |             |             |             |             |
|-------------|-------------|-------------|-------------|-------------|-------------|-------------|
| 0.4256597   | 0.3754634   | 0.7392217   | 0.078524247 | 0.2659712   | 0.08417437  |             |
| 0.3054466   | 0.448636646 | 0.172450417 | 0.5710769   | 0.3004667   | 0.05801002  |             |
| 0.436121187 | 0.5315659   | 0.1962008   | 0.364385171 | 0.5878341   | 0.3509545   |             |
| 0.3187296   | 0.2611373   | 0.2053517   | 0.1676911   | 0.524162339 | 0.3393968   |             |
| 0.368730221 | 0.4631877   | 1.151573    | 0.3627056   | 0.228193    | 0.1892888   | 0.4551393   |
| 0.4080444   | 0.276872928 | 0.6242425   | 0.3697681   | 0.226526417 | 0.2730322   |             |
| 0.2585888   | 0.2399505   | 0.2559102   | 0.1954902   | 1.733028    | 0.5826013   |             |
| 0.7942593   | 1.041647001 | 0.7224188   | 0.358834755 | 1.194072    | 0.6344412   |             |
| 0.2070461   | 0.381925695 | 0.096095101 | 15.29495    | 0.2412004   | 0.2371386   |             |
| 0.3219863   | 0.1791222   | 0.680201957 | 0.3057869   | 13.68417    | 0.145883    | 0.195726638 |
| 0.2362213   | 0.08131809  | 0.279691962 | 0.4516499   | 0.177863582 | 0.2540517   |             |
| 0.352905    | 0.441623222 | 0.7406573   | 0.3256916   | 0           | 0.624940691 | 0.8081277   |
| 0.28006     | 0.4348755   | 0.2929417   | 0.399048    | 0.7388759   | 0.413114    | 0.7109232   |
| 0.4569283   | 0.380746358 | 0.6540447   | 0.269935255 | 0.3941478   | 0.592606738 |             |
| 0.3978793   | 0.4710483   | 0.185098212 | 0.6314561   | 0.2924532   | 0.2869894   |             |
| 0.164170595 | 0.1069528   | 0.2303095   | 0.189561794 | 0.523211077 | 0.2549556   |             |
| 0.8654748   | 0.2794744   | 0.355585067 | 0.629968694 | 0.449960817 | 0.2123921   |             |
| 0.249778    | 0.1488743   | 0.02606887  | 0.3634998   | 0.3972168   | 0.2133873   |             |
| 0.4409228   | 0.3506516   | 0.3611122   | 0.2624995   | 0.328806364 | 0.3428538   |             |
| 0.1498401   | 0.2642344   | 0.2415739   | 9.371119    | 2.018692    | 0.18603     | 0.2080023   |
| 0.6273733   | 0.5419505   | 0.614068791 | 0.6742206   | 0.5098899   | 0.4769416   |             |
| 0.2594363   | 0.21629109  | 0.6194757   | 0.1528674   | 0.5415463   | 0.2083021   |             |
| 0.5282356   | 0.1893508   | 0.3074653   | 0.443775281 | 0.3341743   | 0.243854    |             |
| 0.420496771 | 0.454176    | 0.1379003   | 0.4470332   | 0.381154    | 0.2204578   | 0.274750575 |
| 0.287817331 | 1.266874    | 1.077914    | 0.5165914   | 0.407550376 | 0.837159644 | 0.211785741 |
| 0.2624206   | 0.3899952   | 0.3870955   | 0.3318415   | 0.4525328   | 0.331877    |             |
| 0.3380766   | 0.501896393 | 0.163543523 | 0.4565895   | 0.426790308 | 12.24111    |             |
| 0.366831446 | 0.7421216   | 0.4783447   | 0.3765931   | 0.8373285   | 0.5657184   |             |
| 0.3228615   | 0.6014764   | 0.470112    | 0.3159063   | 0.408693387 | 0.4283702   |             |
| 0.3283365   | 0.3794      | 0.1416794   | 0.265050222 | 0.3601947   | 0.1764035   |             |
| 0.2059665   | 0.439427794 | 0.1962328   | 0.1989558   | 0.2940781   | 0.06265802  |             |
| 0.3571535   | 0.3745568   | 0.4197497   | 0.20510074  | 0.240994954 | 0.851350311 |             |
| 0.1637578   | 0.164912968 | 0.275888599 | 0.2451053   | 0.2688616   | 0.276536942 |             |
| 0.2308136   | 0.5115858   | 0.4170329   | 0.672925342 | 0.4222793   | 0.5892593   |             |
| 0.2479372   | 0.264230624 | 0.4561727   | 0.2071425   | 0.2632393   | 0.1528098   |             |
| 0.3420012   | 0.2827648   | 0.1756171   | 0.2431309   | 0.7271786   | 0.3810053   |             |
| 0.315194    | 0.272653781 | 0.4578524   | 0.2361002   | 0.2754884   | 0.3732798   |             |
| 0.2792699   | 0.1277008   | 0.4183671   | 0.425324888 | 0.315133713 | 0.364886282 |             |
| 0.3347819   | 0.5158314   | 0.2105297   | 0.1985598   | 0.2067144   | 0.134608286 |             |
| 0.229437    | 0.8296731   | 0.1978415   | 0.1307336   | 0.2452892   | 0.273649554 |             |
| 0.3342976   | 0.2180765   | 0.3349028   | 0.1698629   | 0.9521448   | 0.5767874   |             |
| 0.5185152   | 0.403466837 | 0.4582919   | 0.2228448   | 0.371894623 | 0.2720986   |             |
| 0.5376237   | 0.3052736   | 0.5995089   | 0.3394118   | 0.506013607 | 0.390379176 |             |
| 0.477611388 | 0.3185155   | 0.5233018   | 0.4612766   | 0.2306874   | 0.6484971   |             |

|             |             |             |             |             |             |             |              |             |             |
|-------------|-------------|-------------|-------------|-------------|-------------|-------------|--------------|-------------|-------------|
| 0.4319393   | 0.332615476 | 0.388343    | 0.209054011 | 0.6528316   | 0.3572962   |             |              |             |             |
| 0.6485821   | 0.3654909   | 1.016992    | 0.328629074 | 0.3761583   | 0.2794229   |             |              |             |             |
| 0.3773799   | 0.4458505   | 0.277248    | 0.053287    | 0.9221229   | 0.506663739 | 0.455028    |              |             |             |
| 0.376490069 | 0.4136166   | 0.596732    | 0.451981463 | 0.7780196   | 0.4903205   |             |              |             |             |
| 0.1644354   | 0.723599969 | 0.3134007   | 0.5216146   | 0.6265058   | 0.337115815 |             |              |             |             |
| 0.1697807   | 0.5634065   | 0.1408498   | 0.2023502   | 0.5885386   | 0.2957511   |             |              |             |             |
| 0.2876189   |             |             |             |             |             |             |              |             |             |
| MIR200CHG   | 0           | 0.27690834  | 0           | 0           | 0.064259518 | 0.11648329  | 0            | 0           | 0.4561045   |
| 0           | 0           | 0.1230789   | 0           | 0.09678383  | 0.1349263   | 0           | 0.1007284    | 0           | 0           |
| 0.05034384  | 0.047576609 | 0.04540468  | 0.46896025  | 0.0410215   | 0           | 0.418780477 |              |             |             |
| 0           | 0           | 0           | 0.05246613  | 0           | 0           | 0.03749623  | 0            | 0           | 0.175701147 |
| 0.04673032  | 0.04700321  | 0           | 0.08506463  | 0           | 11.75007    | 0.045938361 | 0            |             |             |
| 0.2074841   | 0.1003991   | 0           | 0           | 0           | 0.04330662  | 0           | 0.1381874    | 0.267609332 |             |
| 0           | 0           | 0.09235435  | 0           | 0.06813412  | 0           | 0           | 0            | 0.09230341  | 0           |
| 0.07563679  | 0           | 0           | 0           | 0           | 0.083733936 | 0           | 0.035767576  | 0.04435397  |             |
| 1.72453     | 15.3722     | 0           | 0           | 0           | 0.100658317 | 0.067716166 | 0.05844863   | 0           | 0           |
| 0.04334459  | 0           | 0           | 0.242498127 | 0           | 0           | 0           | 2.682917671  | 0           | 0           |
| 0.1153138   | 0           | 0.846600564 | 0.04415986  | 0.1027634   | 0           | 0           | 0            | 0.04083263  |             |
| 0           | 0.045987037 | 0           | 0.1888522   | 0.2971692   | 0           | 0           | 0.25360275   | 0.06933107  |             |
| 0.06595401  | 0           | 2.206878    | 0.07965809  | 0           | 0           | 13.50896    | 0.03859827   | 0           | 0           |
| 0.076137976 | 0           | 0.04408354  | 0           | 0           | 0           | 0           | 1.015142     | 0           | 0.070620777 |
| 0           | 0.5594506   | 0.1393071   | 0           | 0           | 0           | 0.04961837  | 0.038111209  | 0           | 0           |
| 0.0645839   | 0           | 0           | 0           | 0           | 0           | 0.1278074   | 0            | 0.04400665  | 0.05960243  |
| 0           | 0           | 0           | 0           | 0           | 0           | 0.0516418   | 0            | 0.050325404 | 0.08442586  |
| 0.114058207 | 0.06858874  | 0.03887586  | 0           | 0.1271405   | 0           | 0.050024447 | 0            | 0           |             |
| 0.1005633   | 0           | 9.768732    | 0           | 0           | 0.09676049  | 0.04596813  | 12.153596669 |             |             |
| 0.4807302   | 0           | 13.01081    | 0           | 0.035375858 | 0.1998245   | 0           | 0            | 0.8332495   | 0           |
| 0           | 0           | 0           | 0.053046635 | 0           | 0           | 0           | 0            | 0.0459531   | 0.03453682  |
| 0           | 0           | 0           | 2.607859    | 0           | 0.07153182  | 0.055166552 | 0.04761448   | 1.848734    | 0           |
| 0           | 0           | 0.048564184 | 0.1019414   | 0           | 0           | 70.87184    | 0            | 0.05989533  | 0           |
| 0           | 0.142394773 | 0.03368188  | 0.1175209   | 0.0478997   | 0.051444499 | 0           | 0            |             |             |
| 0.451317062 | 0           | 0           | 0.04644346  | 0.04042965  | 0           | 0.2967106   | 0.051937     |             |             |
| 0.04945496  | 0           | 0           | 0           | 0.19253     | 0           | 0           | 0.05945789   | 0           | 0.5343149   |
| 0           | 0.04227123  | 0           | 0           | 0           | 0           | 0           | 0.058643373  | 0           | 0           |
| 0.1025765   | 0           | 0           | 5.646023    | 0.1194976   | 0.04895218  | 7.710192    | 0            | 0           | 0           |
| 0           | 0.277053053 | 1.295698    | 0           | 0           | 0.09323345  | 0           | 0            | 0           | 0           |
| 4.62730312  | 0.123845389 | 0.08703686  | 0           | 0.09367379  | 0           | 0           | 0.04464149   | 0           |             |
| 0.08385992  | 0.1787174   | 0           | 0           | 0           | 5.478467    | 0.047353921 | 3.449613     | 0.04861892  |             |
| 0.041683156 | 0.04740021  | 0.434669    | 0           | 0           | 0.05298746  | 0           | 0            | 0           | 2.390911    |
| 0.03828401  | 0           | 0.155441472 | 0           | 0.293320322 | 0           | 0           | 0            | 0           | 0           |
| 0           | 0           | 0           | 0.444272911 | 0           | 0           | 0.03272732  | 0            | 0           | 0           |
| 0.2004169   | 0           | 0           | 0.06120579  | 0.160735178 | 0.06975135  | 0.05409635  | 0            | 0           |             |
| 0.04512121  | 0           | 0           | 0           | 0           | 0           | 0           | 0.05273167   | 0           | 0           |
| 0.04456029  | 0.1384512   | 0           | 6.660105    | 0           | 0           | 0.196733826 | 0            | 0.04600352  | 0           |



6.062388 0.05899939 0.04835922 0 0.051802878 0.162048268 0 0 0 0  
0 0.06236464 0 0.1430471 0.02919511 1.151675 0 0.1940891 0  
0.053283784 0.2448771 0 0.1342611 0.05849336 0 0 0 0 0 0  
0 0.06622487 3.311208 0 0 0.1299725 0 0.275528737 0.131807271  
0.04507239 0 0 0 0 0.038056751 0 0 0 0 0.04358526  
0.190393 0 0 0 0 0.1081519 0 0 0 0 0 0 0  
4.99033 0.06498378 0.2274747 0 0 0.03954163 0 0 0 0 0 0  
0 0 0.03413741 0.055573992 0.6200162 0.05138047 0 0 0 0  
0.1242154 0 0 0 11.35622 0.03968847 0.06116363 0.058790882 0  
0.06133538 0 0 0 0 0 0 0.107447221 0 0.04931302 0 0  
0 0.2677366 0.03962872 0.051496003 0 0 0.215621 0 8.330677  
0.03621493 0 0 0.08470889 0 0.2460063 0 0.09811184 0.3299988  
0.03938328 0 0.04508678 0.071739976 0.04269114 0 0.079973047  
0.05353516 0 0 0.037342927 0 0.05383808 0 0 0 0 2.907543 0  
0 0.04309516 0

THCAT158 0.221718 1.359297603 1.740915 0.469180546 4.006080736 0.476497795  
3.763147 0.546573695 0.6716826 3.525584 0.822644515 5.699378 0.8745049  
0.5701151 0.06623309 0.6283711 1.977838 0.444772487 0.5741048  
1.260361 0.350318652 1.760785 1.151024457 1.208207 4.154805 1.918676333  
0.7196746 0.4993508 3.023962 0.9786809 3.557094 0.681615593 1.969472  
0.917853422 0.3595848 0.326243315 1.574040782 0.831023774 0.6422962  
1.245948 1.008960304 0.605474 0.597763068 1.666703 1.037317819 0.8335543  
1.154306 1.281391 0.867675272 0.4744421 1.407524 11.1182 1.13993776 1.45843  
0.814463183 0.4152965 0.4042471 1.99475 0.7939869 0.1003378  
0.7247542 0.6401254 0.531991309 0.4893907 2.741269 2.005351 0.2523327  
0.5754973 1.129935 0.6586222 0.5706781 1.874134811 0.3131015  
0.5636571 0.945383147 0.879046 0.316038889 3.592485 1.218197 0.7508417  
2.557383 2.574255 0.6287064 1.877637619 1.429352459 7.287634 1.280536  
4.618301 0.939712104 1.106412 2.093738 0.2844452 0.785653118 0.7395489  
0.7945537 2.375103088 1.270354 4.675350921 1.239956571 0.5101306  
0.780584664 1.075507 1.018538 0.092351628 0.867094 0.2270019 1.160136188  
1.599089 1.095175388 1.362996639 0.5273011 4.44713349 0.8165845  
3.267832 1.495224 1.462953 2.063131 0.871426001 0.8168036 0.7932057  
2.526466 1.645813 0.5865427 1.288096 1.636535 0.3044996 0.814732 1.016883  
1.248083 0.971746952 0.935841195 1.276753 5.778401997 4.013388468 0.7088085  
1.679752592 0.5435954 3.089563 5.266936215 1.656345999 2.825326299  
0.812538968 4.518832 1.299288 2.532573 1.664782 1.017538 0.9742737 1.085073685  
1.496369 0.913175 0.424550506 0.887689 0.9142817 0.81247794 1.943144  
0.328319 1.914711324 0.6603484 0.9097094 1.827112839 0.4104407  
1.287346 0.5642463 0.512449782 0.3935138 1.46014 1.120935191 0.7678263  
1.163893809 1.216805 0.5482816 0.56819004 0.8081437 1.875641622  
0.7070508 2.118271 1.081805 0.7905417 0.929773 0.78579777 1.0594  
0.9759071 1.357534 0.668666 0.3663084 0.346792 0.9014442 0.9737118  
0.496430013 1.026707178 2.438486 0.3488589 8.373797 0.3759195 0.937733126

0.8501184 1.86890586 1.523237 1.115532 1.514100895 1.05448252 2.993422  
0.9104444 0.572873901 2.371826 0.6112378 0.1413639 1.534786 0.3644291  
0.5188253 1.013743 0.9504534 2.017473 1.823614 0.9460064 0.6615807  
1.051556 0.790838461 0.2726239 1.720576 1.489419527 0.8180608 0.4922105  
1.173285 0.9630689 0.2511196 0.572144668 1.301075 1.085391 0.8051516  
0.5174339 2.097399 0.692263373 0.9702539 1.6718 1.217431 0.545537128  
1.188287375 0.8928297 0.8653362 1.457817 0.782851074 0.5171026  
1.009369 0.398779451 0.7403283 0.3467399 1.345102 0.9327738 0.5902126  
1.602154 0.611880502 0.655469 0.288239022 0.8448465 0.5542856 0.9135951  
0.4162201 1.22759 0.2421319 1.838775 0.277261249 1.543446 1.536249  
0.762794534 0.5810071 0.7686337 1.118479 0.5374996 1.452696 0.7902533  
0.5247679 0.5039011 0.690889672 0.8784532 0.872678073 0.871187  
0.4263406 1.712007 0.975276456 2.132522795 1.166964 5.80728 0.6007456  
0.1305106 0.6098697 1.255993921 0.5408487 5.675163 1.263919 1.700009969  
1.087418 0.6427322 1.587144007 0.2517172 1.390372197 2.008006 0.9711856  
1.611026647 0.7749615 1.224115 0.64899062 1.489444901 0.2136248  
1.061714 0.5747866 0.7421122 0.242619 1.029947 0.580833 1.234964 1.725345  
0.925966599 0.3078623 0.503298637 0.213013 0.25569789 1.911076 0.5966557  
2.148465601 0.1396079 1.161691 0.5816265 0.798518406 0.4421815  
1.563633 1.278255079 0.449095623 0.4207457 0.1879299 0.4389571  
3.179319495 1.25181307 1.151889063 1.992341 0.9664047 2.063736 1.030232  
1.196031 0.5520127 1.037906 1.608472 1.35669 0.6403664 1.196987 0.654258845  
0.6822104 13.61974 0.7871999 0.4745211 1.909139 0.4773041 1.244157  
0.505857 0.215171 0.5322738 0.289045455 0.8198446 1.205595 0.5599572  
0.6910332 3.52430101 0.6163163 0.8763153 0.6768062 0.8443101  
0.9967168 0.4144472 0.2600865 1.290409432 0.3356823 0.3891874  
0.643883633 0.7557419 1.117902 1.11306 1.242966 1.161655 0.668187233  
0.721839206 0.8835247 0.4766296 1.484764 0.371682513 0.642932674  
0.611631576 0.3646863 0.4742298 1.718069 3.253344 2.51968 1.70919  
0.7738302 0.381437739 1.113655699 1.233795 1.066776241 5.966071 1.78425169  
0.8773445 0.3979791 0.2389216 1.544828 1.117849 0.6281535 1.014507  
0.6986845 0.5614333 1.673992665 1.642817 0.9315915 0.5492216 4.76643  
1.321422193 0.4233929 0 1.252265 1.345743338 2.028244 1.068515 1.365365  
1.7778 0.3102105 0.3036379 1.722637 0.637356062 1.758282963 0.614669253  
0.3761301 1.002661596 0.503216161 1.25179 1.732743 0.616487333 0.2666334  
1.281867 2.129851 1.03647491 0.9199974 0.3426895 0.9740408 0.934695198  
17.10814 1.808977 0.4201261 3.55703 1.275333 15.40398 0.5241644 6.873733  
0.6631808 0.2868037 1.289189 1.113040365 0.2783717 0.7974868  
2.277937 0.5799886 1.622481 0.4658481 0.8290411 0.172396764 0.298043713  
0.76414591 0.7915659 0.5958829 0.3150791 1.730366 1.256812 1.60954129  
0.7101635 0.4035493 0.6736045 1.35125 1.193076 0.898437927 0.1016255  
0.7714285 0.2375555 1.216358 0.2572883 0.7598143 1.170945 0.432892188  
0.3643739 0.8129303 2.73711917 0.1733122 0.5883699 0.724742  
0.6223138 0.716831 0.541470044 0.949393396 0.751584822 5.010839 1.997366

0.4161569 0.07480355 1.682272 9.318029 1.820055091 1.093564 1.239260743  
1.349521 1.140479 0.1168398 0.906643 0.4301395 0.742131496 0.6237331  
1.092134 1.690646 0.8023809 3.515789 1.133937 0.5413129 0.327301755  
0.8188973 0.22890385 0.607735 0.1261947 1.295496058 1.839567 1.088757  
1.166384 0.439944722 1.488073 1.215698 0.309491 1.904964403 1.961289 0.5796966  
0.190302 0.5368484 0.6891505 1.501984 0.9387795  
AC020558.2 0.1193094 0.999656524 0.2054406 1.078266895 0.396064952  
0.376067644 0.1947114 0.388073053 0 0.07132193 0.099701775 0.5779808  
0.3921522 2.343508 0.6930175 1.27255 1.130819 0.179503462 0.1782308  
0.3102954 0.251348125 0.8995267 0.33033678 1.715679 0.5205803  
0.368737527 0.3906635 0 0.5125146 0.7160471 0.4924469 0.256356053  
0.9409431 0.565937452 0.4031195 1.185771879 0.657498004 0.970633823  
0.4320351 0.6621836 0.424744963 1.011146 0.103097501 0.9069523  
0.283142096 1.196124 1.187487 0.3094061 0.111168458 0.02659412 0.9164974  
1.982844 1.260117245 0.3041862 0.188504686 0.9045479 0.1812756 0.95549  
0.1083617 1.199846 0.0928571 1.014243 1.208702099 0.3098207 0.2031836  
0.9741929 0.08082354 0.4162402 1.430666 0.1476722 0.3198848  
2.801379707 0.1203458 0 0.589823951 0.2972569 0.078733657 0.6834417  
0.09258866 0.2693585 0.4234343 0.126506 0.8360663 0.221574913  
0.68567942 0.1543926 0.1218059 1.499348 0.441459241 0.9541262  
0.1378187 0.05102123 1.259770144 0.4274396 0.4688156 0.602865255 0  
0.531521425 0.164749878 0.2287567 0 0.1269177 0.3703303 0  
0.8165408 0.1583461 0.156071151 0.5541042 1.369929915 0.844901598  
0.1134991 1.660160946 0.3550828 1.558921 0.4251949 0.3027824  
0.6565688 0.334947029 0.9462164 1.2776 0.08714903 0.1307898  
0.2980916 0.6194744 0.9032214 0.0910307 0.4927955 0.4735367  
0.661434 1.307274674 0.809338673 0.2134863 0.84957225 0.523172806  
0.1271397 0.821724595 0.6036041 0.04469179 0.045419999 0.68561666  
0.170999994 0.571166692 0.5597705 0.5315283 1.388048 0.3732672  
1.064682 0.8300934 0.704697822 0.510348 0.6991343 0.35147113 0.5402301  
0.4707284 0.056051937 0.8713593 0.2551941 0.232056633 0.5264329  
0.4782732 0.195926251 0.6587158 1.443203 0.3140983 0.759328105  
1.058775 1.220752 0.096665069 0.1611685 0.407353906 0.7957385 0.2846854  
0.376649247 0.3159332 1.631964911 0.5737297 1.574595 0.2328534  
0.298527 0.183045 0.55058354 0.2272046 0.1372937 1.726653 0.7359914  
0.2389278 0.1727901 1.569373 1.576161 1.477340524 0.074660094 0.8465689  
0.2458311 2.545791 0.1815398 0.669693918 0.9677037 1.072124441  
0.4281879 2.601225 0.119817307 1.080820898 0.2047627 0.4536316  
0.326954104 2.347239 0.1174697 0.950872 0.9176542 0.3112764 0.6271586  
0.873527 0.1826613 0.3193027 0.9620696 2.094564 0.09889036 0.1435143  
0.939300469 0.9605522 0.5353639 0.218584451 0.1467364 0.275901  
0.7830821 0.3810589 0.1385957 0.662794214 1.615675 0.1738284  
0.5673678 0.05459569 0.6568793 0.149862785 0.105476 0.1529962  
0.2590853 0.939394348 0.125379045 0.7859106 0.1207238 1.855737

0.702104171 0.5101428 0.4937769 0.417255397 0.4350131 0.6697934  
0.06134042 2.919071 0.1017953 0.6008857 1.051805907 0.3048167  
0.086169569 0.3854991 1.491342 0.5650777 0.1244297 0.51608 0.201646  
0.183235 0.817036339 0.8396258 1.78105 0.076012928 0.8746689 0.09400272  
0.2834887 0.5074309 0.3790132 0.1837482 0.3059166 1.280458  
1.213438354 0.1158596 0.204983951 0.9115502 1.019642 0.4967543  
0.957984942 0.602588805 0 0.9995709 0.7327433 0 0.2930169  
0.247268385 0.3637973 0.1482466 0.07954752 0.609865211 0.1288074  
0.02217069 0.06778279 0.02052309 0.415654246 0.6233853 1.033062  
0.577943144 0.9392275 0.7103763 0 0.817846911 0.03831812 1.796611  
1.010381 0.5324538 0.6346495 1.356091 0.4786862 1.679835 0.1311343  
0.852312255 0.115045 0.039250963 0.2149221 0.166781105 1.779046 0.06421366  
0.367021497 0.5425685 0.1275758 0.07824523 0.460385679 0.2566059  
0.1046532 0.150348839 0.637725199 0.3376272 0.168546 0.1142945  
0.410600115 1.105938599 1.007250918 0.3308966 0.1238179 0 0.1279342  
0.3264639 0.1701822 0.1861703 0.2003564 0.6952886 0.1148632  
0.2504889 0.228190489 0.611844 2.308174 0.6339631 0.2837179 0.6420832  
0.06115325 0.3043171 0.1512268 0.7543656 0.1818562 1.036927847  
1.529387 0.1853562 0.9147225 0.08083784 0.56611132 0.09212443 1.66712  
1.033536 0.2271672 1.291205 0.04129991 0.1312087 0.568134293 0.04753554  
0.1163483 0.067937703 0.1303444 1.604154 1.067899 0.2645196 0.5609888  
0.173472111 0.549296662 0.5079448 1.122103 0.4097288 0 1.441544014  
0.952736137 0.3475128 0.1822781 0.5910144 0.5428425 1.142881  
0.191612 0.06506379 1.163121216 1.248485084 0.1659803 0.749880413  
0.7026176 0.145474151 1.056629 0.6589471 0.3035606 1.448464 0.6555129  
0.3661858 0.7405884 0.2278614 0.2120103 0.375332318 1.114011  
0.04774302 0.2167318 0.2832698 0.896069788 0.3535345 0.137414 1.01079  
0.248487051 0.2675061 0.1988932 0.1749336 0.09111027 0.7975466  
0.1225437 0.2574927 0.521910436 1.192802603 1.13155299 0.1190592  
0.179848482 0.107455263 3.421484 0.05864226 0.519390872 0.3649903  
0.2366925 0.3456494 0.709407206 0.1151309 0.1117611 0.1247962 0  
0.1832845 0.3491221 0.1794249 0.9998951 0.124325 1.418519 0.1915221  
3.364094 1.167526 1.246534 0.7656025 0.063717204 0.582538 1.544897 0.4206136  
0.5880136 0.1861214 0.08704133 0.1013904 0.046384488 0.076372028  
0.066322098 0.1014172 0.8438222 0.1589514 0.7218084 0.8115686  
1.492458785 0.3866978 1.289359 0.1726074 0.1782171 0.05732231  
0.119373164 0.6015464 1.102652 0.3956698 0.8027359 0.4038132  
1.223104 1.346369 0.310593339 0.1153379 0.6480719 0.277499126 0.1130444  
0.4690513 0.3646278 0.4146075 0.6039305 0.949166957 1.111639486  
0.398309875 0.0651304 0.8243374 0.19473 0.1174039 0.2593173  
0.2093593 0.74814948 0.2897725 0.284984006 0.1186593 0.6088361  
0.1047884 0.5261414 0.241108 0.691184008 0.4848119 0.1741309  
0.4548796 0.5640262 0.7774901 1.278486 0.4681408 0.587084658 0.83368  
0.252669097 0.112769 0.02829459 0.668956931 1.932653 0.5347269 0.2391036

0.854894681 0.06510175 1.042901 1.152978 0.346020761 0.1296099 0.165424  
0.06826934 0.0802459 0.6893839 1.726517 0.6438437  
SCARNA9 2.015247 1.262953053 0.9716235 2.369162389 1.975115489 3.156818141  
0.6334098 2.759964905 0 0.2677098 1.392153106 1.993205 0.9634644  
3.886433 5.17281 6.714493 1.647895 1.84164789 2.809786 0.6988239 0.566067306  
2.070865 1.580914158 3.213157 2.159706 1.937700036 0.8798228 1.224733  
0.5771234 2.601012 9.788587 1.998504643 7.881643 3.997488915 1.407207  
2.427732794 2.830878965 3.122840508 1.853327 5.59245 0.914988225 0.9699295  
0.557252213 4.955123 2.414041326 1.627517 4.59443 2.190009 0.95973336  
0.8385059 2.1809 5.796707 0.267730293 2.534741 1.910412226 3.115648  
1.451574 1.64825 0.8018593 1.148436 1.045629 5.301072 2.363970446 0.755901  
0.2745569 3.656673 1.747437 2.137329 1.253015 0.7760112 1.368799 3.690797924  
0.5872396 0.9758499 0.996267792 1.42624 1.631325696 1.363288 0.4587466  
8.492806 1.271502 0.4985878 3.590695 0.998028644 6.176942086 0.9851822  
0.9405326 1.22406 3.389390582 0.6876196 0.4267794 1.225666 1.490710866  
3.020721 0.7601984 2.534425038 31.89879 2.394105004 0.788454181 0.4007022  
0.443432347 0.05716689 1.501254 8.207521989 0.4378456 0.6113403  
0.52723753 2.45912 2.153855815 2.510107875 0.2130117 3.602100748  
0.899652 3.042767 4.198672 0.3409519 2.195608 1.508684917 3.505834 6.179685  
0.9028442 0.3787135 1.698094 8.144563 4.280227 115.2854 1.64562 2.488415  
2.062567 5.737309202 4.894371812 1.005304 2.168454949 1.743810547 0.613574  
1.35712589 1.777666 0.4026059 2.506141732 5.01830608 0.8752575  
1.330695086 2.874334 1.749561 4.384599 1.875283 5.28494 1.771081 1.133619523  
1.53249 7.197886 1.451187458 1.024561 1.949288 0.841572995 1.201475 1.061038  
1.306551158 4.223673 2.02754 0.84238701 4.712326 5.377726 1.100382 1.350080163  
1.215624 4.348871 1.393291421 0.7919381 0.917411772 1.843305 0.8160052  
0.249488545 4.771376 5.59789925 2.312198 6.745457 2.534672 2.81534 0.961894  
1.983972415 0.3721404 4.599388 2.243445 5.402367 3.632142 0.9728623  
0.910382 2.254547 1.95983103 2.466109608 10.00954 0.4026489 1.43336  
0.8761079 3.086618784 3.103979 1.938447874 1.377618 2.102973 1.529113227  
2.2312981 1.02478 2.656251 0.578553954 3.248856 0.3527418 1.332478  
2.472625 10.30519 5.467507 1.324911 0.06856266 7.225337 2.004198 1.433079  
0.5345122 0.1846926 2.158593608 2.910599 0.4964673 0.164093143  
1.888393 4.691294 1.543149 0.8009793 0.5852526 3.707662233 10.25912  
1.918267 0.8131346 0.5533034 0.8741756 4.435841383 0.8314082  
2.274139 1.542087 1.851179017 0.564738476 2.872025 0.8933364 2.944543  
1.020145876 3.968945 7.598988 0.402733355 0.7218869 4.256007 0.9670239  
3.24697 1.329683 0.8825671 3.244223356 1.814283 0.970323052 1.137631  
6.540603 2.290726 0.8406939 1.007306 1.047997 1.179052 1.840067676 3.98631  
3.7841 1.754703542 1.969863 0.6351175 0.7857869 3.085554 4.00118  
12.76942 0.7949564 11.61982 2.151364546 0.1043721 0.755426304 2.052925  
5.248826 0.9661954 1.407066194 1.29810053 68.94428 2.191917 1.553157 0  
1.539791 1.113758446 0.5462112 135.885 0.4926651 4.257826667 0.8702713  
0.2496557 2.022682614 0.4622055 0.936105171 2.534894 1.733533 2.982833331

6.007331 3.745117 1.31085074 2.394461141 1.121863 1.497091 0.6965827  
1.319068 3.512018 4.736045 3.646382 2.702285 3.071441 1.08280245 0.8291061  
1.546966067 3.710907 1.831107707 1.319257 0.4820572 2.603721201 0.1879895  
1.484469 0.9398293 3.513755669 0.6829828 0.3771073 1.312091767  
1.058279628 2.638961 1.594263 1.40143 1.900818756 6.302255045 4.129750712  
0.5216542 0.6134773 0.6581677 0.76833 0.6827205 0.7665432  
2.830132 0.8573326 4.854217 2.291221 0.6850178 1.027826847 2.411411  
2.024115 3.472063 0.638968 387.4213 94.066 0.7424733 1.277181 2.726182  
3.583676 5.886878793 2.715753 1.043613 0.9694443 1.304741 5.152936074  
1.314013 16.09098 2.734067 1.492192 2.236887 0.2325313 0.6894963 0.900395394  
4.246553 0.5989276 0.841522969 5.049093 1.016087 1.411655 1.14891 3.17659  
1.882371204 2.429987508 1.555779 4.933893 2.537591 0.563051626 0.919852094  
1.885598046 1.611322 1.049089 1.045816 3.616708 3.392883 1.294602 0.9280346  
4.776724273 7.792547735 1.869042 0.465882527 256.3459 2.784820336 0.6075726  
4.019251 0.4021508 3.474868 8.539363 4.85302 5.289617 1.924396 2.148631  
2.694378332 5.179648 0.9139474 2.396162 3.189794 9.634613104 1.179561  
1.299789 1.770553 2.518307158 2.610647 2.158219 0.9192687 0.5129792  
2.088575 0.7359563 0.1288679 3.806080961 8.332207552 2.09099354  
0.7597188 1.16449345 0.677607408 0.6020007 1.650871 6.075064853  
5.470575 1.142274 0.450679 1.487489078 4.753633 0.6921746 0.09368556  
1.120955723 0.5307165 2.543803 0.8485833 1.447643 0.6719887 4.236425  
1.842962 1.306269 4.961157 5.92663 1.513102 0.239165144 2.099117 0.3221576  
2.300523 1.98642 0.6096996 0.8625228 0.1902866 0.417854592 0.558997809  
0.398308349 0.9592971 1.837046 0.7557323 2.032003 4.400148 1.818355836  
0.614747 2.852853 1.392961 0.9632809 0.7315495 0.873740546 1.067385  
8.131619 3.084569 0.6489759 3.810977 10.23131 1.819315 1.865319768 0.865851  
0.3648847 1.538369528 1.113831 0.5942036 3.213342 4.489172 2.457003  
1.640516182 1.118607753 3.312160564 0.4400454 3.070383 0.6212881  
1.057633 1.221122 2.200348 0.970108842 1.154607 5.134556025 1.443072 1.151787  
1.592976 2.908479 0.8326082 1.15306114 0.08398899 1.029432 2.634288  
1.533069 0.9727803 3.337382 7.653521 1.127748441 3.442177 1.813822335  
1.058208 0.7009525 4.876543427 7.802787 0.1047193 1.682785 3.25824972  
2.785728 7.526655 1.683013 0.779281885 1.000792 2.075666 1.499073 0.722895  
1.177818 3.418313 11.67449  
AC084018.1 1.962243 3.795387041 0.4854073 3.764876544 1.65142467 2.946022592  
2.134904 1.845203809 0.3349019 0.13217 0.609714698 4.568839 1.659885  
6.425465 5.614065 5.685001 1.879853 1.10882092 1.348675 1.54024 1.397354958  
4.83417 3.845146108 7.756075 1.865956 2.391636757 2.219085 0.5779823  
1.187206 3.788201 3.273372 1.39778862 4.588699 3.718349373 1.568783 5.201011273  
4.972311748 4.818018791 3.288279 5.033124 4.081019082 8.562231 0.401215099  
5.765789 3.373096403 4.883433 3.681754 0.7986293 0.412022956 0.5913938  
4.758736 7.684653 4.8576198 2.156159 0.654987875 4.141348 0.5038954  
5.538032 0.4303076 2.70988 0.559253 6.516334 3.536688143 0.7894469  
0.5647936 6.561653 0.7863339 4.79011 8.34034 0.3420729 2.267435

12.108865833 0.278773 0.1338287 1.460220297 1.939988 0.372057825 3.908112  
0.463267 4.164874 0.4904287 0.9230848 4.107589 0.55432465 6.753858899  
1.037157 0.5562489 3.594699 2.259040674 1.273058 0.2154924 0.4254743  
7.330057022 3.666916 5.004197 2.401975378 0 3.283290857 1.087651623  
0.7065329 0.486500756 0.8114301 2.745106 0.34534988 7.673934 2.07503  
0.831515444 2.718096 7.903441818 2.698380122 0.6309914 9.623510995  
0.8019625 3.408914 2.909349 0.7364441 1.963341 5.082030641 4.242285  
8.293256 0.4360499 0.3375906 0.9992077 2.559679 2.589162 3.669078  
5.502952 5.338326 4.879365 4.565616363 5.999293657 0.9710709 3.542359817  
4.362822173 0.4291443 7.461604106 3.323435 0.4348074 0.284073508  
6.233627875 1.317966416 3.449105829 2.365128 1.733221 3.106752 3.192549  
6.130431 2.823563 3.82444647 2.968604 6.746366 4.803541193 3.79374 3.250128  
0.70113918 5.388015 1.064052 1.870652336 2.560838 2.502523 1.559594132  
4.092926 7.403413 0.7275879 5.165708819 3.087367 4.719841 0.214961482  
0.2443655 5.343181784 7.014979 1.043138 1.508882292 1.368968 5.618164302  
2.308275 11.67975 0.8360536 1.633711 0.7349536 2.999717733 0.9760552  
0.7394239 11.44523 7.99397 4.732085 0.09606165 5.948753 6.453519 5.062923389  
0.380479323 4.216194 1.490927 5.484356 1.477845 4.134398806 3.831135 5.015980609  
3.542389 4.542349 0.407071621 5.695803311 1.106745 1.103348 2.239643777 1.15541  
1.170076 2.290737 4.987768 3.223098 2.671225 2.998035 0.4231227 0.8453067  
4.412569 13.8556 0.6322413 0.3989295 3.650061031 4.709026 1.488162  
1.552764833 0.5244252 4.122236 7.924727 1.977243 1.300243 3.892775966  
7.859468 0.918069 2.150623 0.2276411 0.9959676 0.416576621 0.03664924  
0.8080446 0.437255 5.684916516 0.435648343 4.905072 0.8149759 3.927441  
3.273740856 4.898733 4.666709 2.982479882 4.009501 3.723677 0.3126002  
0.5689837 0.5659247 2.505441 5.49787646 1.66435 0.279448515 1.200908  
9.491044 2.23833 0.595682 2.486567 1.185714 1.127829 4.073226732 6.528682  
5.417878 0.316942018 3.103832 0.5443776 2.485292 1.957091 3.061882 0.07296693  
0.78495 8.976803 4.987762436 0.3864688 1.061896358 2.217123 4.757609  
2.855824 5.528474593 2.548956142 9.63689 3.034444 4.912334 0 2.009112  
0.916449257 0.9901868 3.159311 0.5251597 3.305746657 0.537073 0.3081415  
0.659460185 0.1996695 1.309456208 0.5294779 4.420047 3.614670627  
2.924085 1.817573 0 4.395212247 0.1597705 0.6742004 5.617152 3.404167  
4.107945 8.331257 4.931097 3.053117 0.7654852 4.070146337 0.03197929  
0.518256814 5.443191 1.216962653 3.19632 0.356992 1.402798511 5.191649  
0.3841771 0.1449999 1.315291837 0.9402495 0.2327253 0.287325306  
3.312145645 4.692546 1.124426 1.164925 5.262907647 6.707345347 6.892001976  
0.6438599 0.5162687 0.09026154 0.4741617 0.6481989 0.4085509  
0.2264069 0.6126283 3.285603 0.6157689 1.044434 1.631071875 2.787349  
0.8233022 3.664659 1.070319 7.139246 0.8499447 0.8459163 0.7093716  
2.340754 2.780302 4.293529368 2.616164 0.9446037 4.063291 0.5992176  
4.655325385 0.1280401 10.8902 6.293108 0.3420415 7.067938 0.5453104  
1.053646 2.368881626 0.638655 0.577528 0.566543435 0.978267 6.131261 4.807616  
1.365539 2.717797 1.117836416 1.745018366 2.5415 6.052603 9.538551 0.463303553

4.875291776 1.8458127 1.846743 1.041513 1.232141 0.7859117 4.837538  
0.4438565 0.633007 9.065503594 3.222550785 0.8458612 4.672060566  
8.187914 1.263679528 4.374452 4.15946 1.389811 7.046068 3.697877 2.60346  
8.028651 0.3562824 1.620656 3.064749137 4.495122 0.1990683 1.122755  
2.612772 4.981646721 1.546885 0.4201698 6.107226 1.973498561 1.164961  
0.7036495 0.5673109 0.6648103 4.923705 1.116533 0.9941079 3.626912557  
5.254474308 5.605265518 0.8549571 1.312312244 0.44804336 2.154784  
0.3667705 4.564148754 5.212795 0.6344412 0.632111 4.657890396 0.9867641  
0.4659968 0.6648891 0.873825624 0.5094796 1.341521 0.673314 2.382368  
0.4492652 5.057436 1.766526 0.9673698 5.449814 4.400022 4.603776 0.265674008  
4.441489 3.021973 1.865134 3.771954 1.058247 0.3387308 0.3757828 0.451275654  
0.530732186 0.921784401 0.4792493 3.674757 0.3682005 1.153695 7.102014  
7.141063687 1.549137 9.683242 0.3998335 0.6440117 1.301276 0.394041006  
2.102831 4.1168 2.855383 3.518717 11.2516 9.179693 5.389243 4.424733337  
0.6679314 3.115022 0.741701873 0.5891844 5.093092 4.472899 7.823653  
2.166139 4.080345106 6.508822034 0.97943734 0.1206962 5.398074 1.014928  
1.095604 1.736544 0.7274503 4.316841525 1.796855 0.079217582 0.5277436  
1.015436 8.774882 3.01369 0.2904256 5.194621067 1.347641 0.6050441  
1.505283 1.675961 0.7504184 4.482676 3.084564 2.927876438 4.717559 1.558337762  
0.3134664 0.1573021 2.666933331 9.728986 3.069721 0.5815609 3.130407953  
0.2940676 5.336746 4.837108 1.442761391 0.6948246 1.215271 0.5455878  
1.338367 1.685018 8.754646 2.936952  
AP000766.1 0.7064183 0.809990338 0.5838682 0.727229846 0.597582472  
1.411492358 1.038618 0.870722261 0.5706815 0.967842 0.536077657 0.3919301  
1.132992 1.378702 0.3916338 1.120595 0.8856318 0.520878001 1.152258  
0.5362713 1.234808374 0.6218467 0.642271647 1.036932 0.9891422  
0.625473257 1.020907 1.124134 0.2993537 1.827443 1.163549 1.215547808  
0.871742 0.508803121 1.114713 1.726990928 1.03977732 1.095040242 0.9758059  
1.704718 0.748255028 1.168611 0.823584672 0.9836879 0.967035778 1.1006  
0.7191778 0.220684 1.319991178 0.7558126 1.198752 0.3734411 0.789856099  
0.9229185 0.986405411 0.9808908 0.9978914 1.514701 0.7104648  
0.5414523 1.182807 1.260454 0.940639448 0.8874604 1.104185 0.6043906  
0.8132722 0.7545409 2.132968 0.5907781 1.824387 1.161963583 0.6624831  
0.901404 0.853014189 1.26573 0.205620363 1.046175 0.9529922 1.241392  
1.416178 0.9960057 0.9520927 1.71897175 1.156408928 0.4941309  
0.7050492 0.3886896 0.897822821 0.8464759 0.7443336 0.8393239  
1.176760235 0.7104235 0.6625927 0.223817366 1.083971 0.635086792  
0.529915596 0.8980818 0.579746735 0.1901006 0.8533699 0.795250127  
1.030397 0.8948359 1.483524151 1.339439 1.315331259 0.814680017 0.882702  
0.816436521 0.93756 0.6585878 1.011201 0.7703948 1.107978 1.259590955  
1.213294 0.6607349 0.9170857 1.449519 0.6667036 0.8552047 0.9105846  
0.8798535 0.5873649 1.310106 1.299456 1.757242406 0.972792068 0.5478497  
0.483989408 0.691194681 1.109117 0.894171329 0.7890761 0.6136215  
1.003024979 0.82834996 0.441806307 0.639172921 0.8427385 0.9618026



1.166569 0.6175346 1.385252 1.052892 0.692721849 1.027202 0.767166 0.461199738  
0.9500386 0.9185145 0.721160975 0.7580904 1.247734 0.730810238  
0.7897685 0.718531 1.002153739 0.9933384 0.4938076 1.119197 0.752088134  
0.7375168 0.5839184 0.746212305 1.091657 1.070687679 0.7334633 0.50692  
0.659457281 0.703039 1.287287372 1.101727 1.196325 0.4098838 0.9172133  
0.312444 0.625909752 0.7853375 0.6821782 1.07972 0.9945563 0.9462968  
0.5640722 1.086741 1.284297 1.309647563 0.692950265 1.23279 0.6222701  
0.342206 0.458172 1.327876414 0.6025305 0.739424465 0.9514549 0.3201991  
0.562427457 1.093955874 0.5199028 0.9320816 0.964193068 0.4084812  
0.3496426 0.3002673 0.5412355 0.6216505 1.157707 0.6333135  
0.8827525 0.3678922 0.8498281 0.8655301 0.8431478 0.7952711  
1.936248039 1.116784 0.6470692 0.312477208 0.3985125 1.223861 0.9022468  
0.8537008 1.576902 0.985360262 0.8747508 0.791108 0.7626574 0.1677433  
0.9288481 0.661893965 0.7949875 1.02829 1.336194 1.435611259 0.926941818  
1.577516 0.8279451 0.8544427 1.187324129 1.384829 0.82809 0.667709421  
1.235441 1.736367 0.9187728 0.7998039 1.40743 0.5117184 0.952805587  
1.191578 0.683944938 1.171669 1.306299 0.9874528 0.8522235 0.8721004  
0.5004059 0.9651136 0.317200072 1.503384 1.032493 0.755378476 0.300187  
0.5595887 1.042698 0.9305658 0.2410888 0.4133383 1.251717 1.290897  
0.718877101 0.6407541 0.840933831 1.419107 0.9300541 0.8758649  
0.919804382 0.533292991 9.860442 0.8536572 1.092556 0.3708676 0.7652412  
0.7069646 0.5792527 6.386242 0.6301115 0.884194074 0.7137746  
0.5066323 0.972965463 0.6936208 0.97377549 0.3557989 1.45866  
0.980339548 1.020831 1.237016 1.84421501 0.958006907 0.7946844 0.6451527  
0.6256233 1.349655 1.068984 0.6717789 1.316642 0.5104517 0.9669731  
1.070141223 0.6627592 0.768806904 0.6786832 1.0008377 1.24986  
1.060456 0.525066805 0.2925303 0.583875 0.4056845 0.476417628 1.057189  
0.5305463 0.837268718 1.153718338 0.2097577 0.7023359 0.9535123  
0.499365115 1.174482992 0.828240233 1.162814 1.260161 1.515217 0.4722338  
0.900057 0.938805 0.6971269 0.6463673 0.9346089 0.5923897 0.6699801  
1.35839483 0.6788414 0.9727666 0.8217403 1.381509 6.154654 0.9159694  
0.8984796 1.346727 1.667575 0.6766074 1.041232726 0.8245815 0.6347554  
0.8644895 1.443658 0.634140397 0.2476678 0.5945371 1.130957 0.3489815  
0.9345758 0.7930779 0.9714411 0.897030072 0.4898802 1.008593  
0.812114014 1.261508 1.078154 1.096666 0.8526375 0.9726128 1.038718545  
0.327744165 0.4486846 1.149207 0.8703953 0.672125879 1.273363879  
0.565490948 0.7419088 0.855621 1.021427 1.281302 1.346725 0.7113711  
1.191107 1.002898707 0.424691717 1.120868 0.8341998 5.199722 0.69139753  
1.195834 1.049202 1.056122 1.384689 1.567298 1.306298 0.5079087 0.5961755  
0.6412159 0.891924217 1.794188 3.502192 0.4388891 0.8604459 1.265557189  
0.9152425 0.7863468 1.169998 0.650992345 0.9143668 0.5590104  
0.722235 0.7654418 0.933159 0.9203602 0.3790865 1.021309207 0.86962371  
1.398462414 1.078362 1.066302755 0.837761719 1.314048 4.498775 0.781818027  
1.150422 0.3279025 0.8943119 0.864335217 1.658135 0.5311688 0.7868343

0.78475451 0.4676031 0.5875996 0.8027965 0.5440251 1.518386  
0.6158535 0.98297 0.6746442 0.7741203 0.5471331 1.116136 0.73005449  
0.6967541 1.197648 1.173088 0.4864059 0.4971206 1.13324 0.412113  
0.881809446 0.953266795 1.146218864 0.6816262 0.9884338 1.363373  
1.046491 0.9264102 0.624871821 1.672971 1.142409 0.8700725 0.6639231  
0.2678502 0.765058716 0.4690582 0.6725893 1.256593 0.7035499  
0.4172597 0.9059325 1.468518 1.113334576 0.6164587 0.6118723  
0.721435855 0.7651997 0.9513797 1.412559 1.044203 0.8604386 1.30554444  
1.031000205 0.376551587 0.3126731 1.31508 0.8912191 0.8277221  
1.041198 0.6633503 0.892473002 0.8560727 0.426856478 0.6471233  
1.000785 1.222436 0.9307411 0.6481963 0.997913143 0.9023339 1.554876  
1.547344 0.8926186 0.4686381 0.574708 0.8357055 1.143951723 0.9491093  
0.876388714 0.678521 0.3912035 0.912735859 1.642909 0.343765 1.256918  
0.98498735 1.175134 1.424628 1.968045 0.539873878 0.5937772 0.6943184  
0.3605165 0.4468766 1.01797 0.8889678 0.5674605  
AC254562.3 0.3507432 0.675814333 0.3623699 1.491051686 0.81979258  
0.366125501 0.599666 0.694802575 0.2529898 0.0599059 0.552704924  
0.5916632 1.212728 0.134209 1.521752 1.717813 0.893945 0.226157294 0.07485128  
0.1954713 0.422232983 0.3022182 2.185012893 2.411882 1.415324 0.619432296  
0.6205985 0.0806061 0.4842898 0.5529315 0.3506813 0.347829193  
0.4367627 1.004720393 0.6094707 2.056620007 0.609106592 0.917179742  
1.373768 1.407862 0.860874601 1.344722 0.441636362 0.8887462 0.407693849  
1.977941 0.8439658 0.6125778 0.396841445 1.306737 0.5228828 0.8167175  
1.557672664 0.6898422 0.296872476 1.005568 0.3298967 2.356426 0.273051  
1.058184 0.1169911 0.6992008 0.841574841 0.4879307 0.2303928  
0.6923741 0.2443919 0.9229846 1.176634 0.2480706 0.4836294  
1.076488977 0.3537898 0.09098653 0.905680051 0.1791161 0.198393844  
0.5904491 0.2566364 0.55147 0.177829 0.1195392 1.200345 0.111665328  
1.314616542 0.6484 0.219234 0.8028401 0.328661667 0.3846747 0.5209156  
0.4499733 1.291273703 0.5385333 0.4725305 0.227865869 0.1631181  
0.967295991 0.492976805 0.5123763 0.22050589 0.5116935 0.622108  
0.104352949 0.78382 0.2280012 0.229407279 1.170375 1.009536308 0.317083818  
1.501479 1.224377521 0.8388197 2.199784 0.8241618 1.208011 0.5013419  
0.597835327 3.384147 1.262115 0.1756792 0.117702 0.1325531 0.3796924  
0.6638176 0.5352201 0.4924185 0.9722553 1.153861 1.858200987  
0.453195453 0.6602051 1.748287743 0.395488793 0.2288343 0.966275198  
0.3217431 1.154302 0.1430622 2.807388346 0.156686351 0.62035838  
0.282103 0.489378 0.5450832 0.7958605 2.764923 1.981589 0.930130926  
0.2619589 0.4278379 0.516623571 1.038869 0.5548102 0.376640592  
1.008211 0.4699142 0.292369292 0.538895 0.5316871 0.381493053 1.049604  
0.2644799 0.5276453 0.453164784 1.412423 0.9787474 0.243577591  
0.2215167 0.609457286 0.9739104 0.3912835 0.418713738 0.7258483  
2.372446856 0.9130672 0.9487927 0.9290149 0.8932745 0.2306194  
1.470607762 0.4684191 0.4324426 1.282939 1.991933 0.4515394 0.3265487

1.737593 1.26126 0.917905603 0.21948411 1.333245 0.7320745 1.186758  
0.6861688 0.608285358 0.7389179 1.17954987 1.515671 1.176465 0.469648399  
1.049668077 0.2293169 0.08572991 0.91213311 0.1232207 0.76467  
0.5856929 0.2271023 0.4117876 1.248963 0.471669 0.4602717 0.2298806  
0.9999958 0.5010667 0.2741034 0.2841368 0.941913097 1.980335  
0.6745077 0.214196596 0.3961585 0.5735549 1.294924 0.480098 0.5238521  
1.158305823 1.102615 0.153305 1.169721 0.03439269 0.4890396 0.350652451  
0.7641163 1.002355 0.2098433 1.158890313 0.394914188 0.9714902  
0.4128441 0.6376505 0.485094723 1.051742 0.7880084 1.001337379  
1.471149 1.687752 0.4894596 0.8745875 0.1539028 0.2633248 1.987763144  
0.4937659 0.361884878 0.5526842 2.142661 1.317097 0.348377 0.9969913  
1.172561 1.022374 0.111890011 0.9148962 4.191535 0.239422655 0.9144252  
0.2763471 0.3846433 0.4315374 0.4178306 0.4299383 0.6819071  
2.158915 1.593872984 0.5254996 0.352173119 1.066433 1.697576 0.5405182  
1.521831657 0.891240178 0 0.795388 0.8417293 0.2212061 0.6152891  
0.207689768 0.3437625 0.9338831 0.2756114 0.576279132 0.5564062  
0.1396648 0.59779909 0.4395713 0.872808044 0.1745347 0.8932273  
0.970871209 0.7100024 0.7322781 0.36666427 1.511267034 0.3379403  
0.2942627 1.40288 0.9391777 0.3426849 1.485691 1.170722 1.186133  
0.3965203 1.84478899 0.3188806 0.098904962 0.5415629 0.288926459  
1.230052 0.7550957 0.901703765 0.9465019 0.1071556 0.3286051  
0.354470221 0.3232991 0.1318531 0.165747086 0.761185053 1.251112  
0.5733501 0.06400008 0.632276458 0.527794498 1.69205384 0.08337964  
0.4367966 0.04091094 0.1432755 0.381934 0.4288268 0.2052373  
0.176701 1.270196 0.3928025 0.7889806 0.862494953 0.4068456 0.7205863  
0.7624272 1.072373 1.752755 0.4622837 0.3035334 0.33343 1.10515  
0.2004814 0.707649848 1.519272 0.2335312 0.4971411 0.1188227  
0.86183944 0.5029614 1.650324 1.24015 0.3577613 1.276408 0.3122037  
0.2755175 0.636262389 0.3992684 0.3350577 0.492171516 0.4269762  
1.452652 0.8774684 0.2380497 0.8279569 0.496723556 0.296597813  
0.3839773 1.21178 0.548483 0.489980831 1.422696569 0.909361318 0.7984016  
1.148265 0.2127491 0.68393 1.439922 0.1877656 0.6284688 1.29301953  
0.943783495 0.5576518 0.977356568 0.8852313 0.229104498 0.4815165  
0.5188817 0.2924675 1.507548 0.7449149 0.4436148 0.5865017  
0.3229692 0.3672801 0.797990115 1.675203 0 0.1489426 0.5840067  
0.87403566 0.5114079 0.4847601 0.7074998 0.894485877 0.4044387  
0.3644895 0.6244659 0.4591611 1.051569 0.3087867 1.802313 1.15855373  
1.222631479 1.279428744 0.325007 0.736423957 0.162460096 0.8419424 0  
0.675492244 0.285426 0.4899166 0.2521231 0.647224073 0.2901079  
0.5632333 0.3668733 0.627095674 0.5608082 0.2328674 0.3842992  
0.4499189 0.3446028 0.3108172 0.3948539 0.04175802 3.802322  
0.5982914 0.7086757 0.535184125 0.2516374 0.6127631 0.7065775  
1.02578 0.3837194 0.5044535 0.2980654 0.54544041 0.529218211  
0.612769937 0.2555519 1.134012 0.4227789 1.455056 1.287592 0.770637769

0.7737921 1.994963 0.2537137 0.1796292 0.2648091 0.281997817  
0.9416224 2.342633 0.5943729 1.270697 0.5087662 1.166753 1.696297  
0.880465665 0.3148487 0.816509 0.806821182 0.03560629 0.480155 0.7190552  
0.80364 0.368175 1.084617311 1.51975665 0.308820042 0.5197014 1.298233  
0.552018 0.3592289 0.3861178 0.3077349 0.799779447 0.1965847  
0.646294948 0.0298999 1.258004 0.4290761 0.502188 0.1012577 0.580550751  
1.221634 0.2742355 0.191035 0.857644 1.278875 2.050072 0.8301071 1.762157012  
2.100715 0.616781884 0.2367971 0.1069455 0.887181183 2.969462 1.171661  
0.3389037 0.621395774 0.3485936 1.911209 1.02223 0.272470786 0.1399682  
0.2381926 0.1505225 0.3538577 0.3594034 0.5258839 0.935979  
ATP6V0E2-AS13.468166 0.270934323 0.3076927 0.476478079 0.560391419 0.293184417  
0.2613113 0.532871984 0.02910421 0.1148606 0.375722093 0.2094324  
0.6372839 2.043165 1.898917 0.2986243 0.4552828 0.144540922 0.2918161  
0.107082 0.161913711 0.3042155 0.438893215 0.427541 0.251511 0.252379605  
0.1846404 0.5100154 1.733299 0.318049 2.172301 0.109563856 0.4027626  
0.596562889 0.1801544 0.450126973 0.331675289 0.778788598 0.2435202  
0.6698422 0.611167448 0.5292307 0.199240384 4.045061 0.195422986  
1.059466 0.9929729 2.648023 0.098467352 0.2376986 0.2297509 1.404734  
0.292916953 0.2424893 0.210607162 0.1670957 0.3113981 0.3093913  
0.3178601 2.876705 0.2916068 0.2172718 0.668488866 0.174633 0.06871569  
0.4827359 0.218673 0.2775188 0.4512039 0.7729122 0.1159109  
0.267305762 0.17443 0.7617783 0.663434329 0.206057 1.04607389 0.575483  
0.8320319 4.888262 0.09376413 0.3514376 0.3428738 0.160576167  
0.266461366 0.379179 0.260616 0.6428948 0.431416931 0.1244626 0.09987776  
0.2341768 0.469374983 0.2492379 0.280862 0.082525311 0.3064995  
0.328129554 0.184067064 0.1412207 0.153260304 0.1778236 1.031771  
0.080032465 0.1784643 0.1366119 0.377017822 0.3700663 0.46829874  
0.334378423 0.2833166 0.679814444 0.4127999 0.5924944 1.516999  
0.7314252 0.2499245 0.600100705 1.415694 0.1683421 0.122104 0.4017031  
0.1863772 0.2224455 0.2090981 4.405349 0.2175624 0.4490917  
1.241377 0.461547436 0.43084667 0.239104 0.280480173 0.207266091 0.1096889  
0.357304131 0.3420959 0.8097077 0.208468273 0.448562252 0.642153369  
0.661331062 1.400906 0.1777849 0.4093369 0.2011471 0.1679628  
0.2216317 0.14591347 0.1369819 0.1785392 0.339616589 0.5220091  
0.2457665 0.153457294 0.5541536 0.2039083 0.280287183 0.3894559  
0.2106823 0.27537161 0.7347813 0.1331139 0.6196546 0.30410648  
0.1303905 0.3753203 0.326916505 0.1203388 0.467417256 0.8293131  
0.6814566 0.203381303 0.3142561 0.509466923 0.510612 0.603633 0.2203121  
0.1532434 0.2014367 0.367089153 0.2145517 0.5223607 0.2941118  
0.5794699 5.699581 0.2170509 0.4537834 0.4785102 0.22977081  
1.46087412 0.6475956 0.5560587 0.3812885 0.05011909 0.112867369  
0.1629279 0.357480346 0.2019474 0.3625226 0.263712153 0.320925151  
0.2693046 0.1095829 0.552871343 0.1890058 0.08986021 0.9085918  
0.1820908 0.2744595 0.6695385 0.7665483 0.161792 0.1505935

|             |             |             |             |             |             |             |
|-------------|-------------|-------------|-------------|-------------|-------------|-------------|
| 0.2614558   | 0.4291218   | 0.7071066   | 0.3466844   | 0.319519079 | 0.2278197   |             |
| 0.2206162   | 0.340285932 | 0.4101703   | 1.586242    | 0.2246364   | 0.4418477   |             |
| 0.1046258   | 0.216922975 | 0.5420768   | 0.3023378   | 0.8908761   | 0.8308797   |             |
| 0.7934048   | 0.16032332  | 0.2356866   | 0.1774031   | 0.299522    | 0.274204101 |             |
| 0.363450651 | 0.197015    | 0.2874638   | 0.310744    | 0.317327053 | 0.3584993   | 0.4572425   |
| 0.628772023 | 0.3650328   | 0.3293798   | 0.2321467   | 1.010434    | 0.1868876   |             |
| 0.3281759   | 0.60206519  | 0.2892762   | 0.513456472 | 0.1669813   | 0.5182693   |             |
| 0.3276111   | 0.2605047   | 0.4238724   | 0.3859427   | 0.2149951   | 0.180207175 |             |
| 0.1534904   | 0.3247128   | 0.252481411 | 0.1663362   | 0.1248942   | 0.1896418   |             |
| 0.1685462   | 0.3376181   | 0.4565588   | 0.1875914   | 0.3184152   | 0.193339593 |             |
| 0.1175495   | 0.315111651 | 0.1966083   | 0.2595082   | 0.4854541   | 0.186140905 |             |
| 0.215184699 | 1.264123    | 0.4638655   | 0.270717    | 0.4665426   | 0.2217882   | 0.199107025 |
| 0.07323479  | 0.5849232   | 0.3506944   | 0.537732111 | 0.3244928   | 0.1606718   |             |
| 0.42982136  | 0.2181396   | 0.180735711 | 0.1129424   | 0.1810494   | 0.197784402 |             |
| 0.8939357   | 0.3627087   | 0.98423342  | 0.34244699  | 0.194385    | 0.1866216   |             |
| 0.2440756   | 0.4501832   | 0.1883535   | 0.9352874   | 0.3673119   | 0.945367    |             |
| 0.1393825   | 0.364269209 | 0.4279841   | 0.137485711 | 5.578331    | 1.591414054 |             |
| 0.5765079   | 0.1809729   | 0.31474519  | 0.5847611   | 0.3646823   | 0.4032328   |             |
| 0.37689327  | 0.3888323   | 0.1567413   | 0.222456664 | 0.235134969 | 1.429697    |             |
| 0.2972217   | 0.4969778   | 0.330626042 | 0.542414293 | 0.71124162  | 0.1838482   |             |
| 0.2213372   | 0.01568812  | 0.2438045   | 0.3323521   | 0.1345437   | 0.781402    |             |
| 0.1742389   | 0.277133    | 0.5073786   | 0.1944967   | 0.464612357 | 0.1108514   |             |
| 0.5378435   | 0.194912    | 0.3035216   | 1.034045    | 0.5909066   | 0.1072068   | 0.1095947   |
| 0.1822305   | 0.2800578   | 0.464447419 | 0.2984025   | 0.2761193   | 0.2079695   |             |
| 0.2733896   | 0.683771649 | 0.9569352   | 2.249494    | 0.4557452   | 0.2423704   |             |
| 0.2735242   | 0.1446626   | 0.2359577   | 0.289735254 | 0.1799013   | 0.1967421   |             |
| 0.123086769 | 0.3463574   | 0.2785243   | 0.2243219   | 0.1232346   | 0.5110922   |             |
| 0.152382893 | 0.630289127 | 0.3730176   | 0.5356743   | 1.815615    | 2.006428644 |             |
| 0.348230778 | 0.06974257  | 0.5876356   | 0.1663451   | 0.3722221   | 0.7430889   |             |
| 0.2886327   | 0.3857276   | 0.3353029   | 0.815371943 | 0.83584605  | 0.2472557   |             |
| 0.249857994 | 0.4308527   | 0.263564153 | 0.3041248   | 0.8091675   | 0.1897966   |             |
| 0.1977709   | 0.38501     | 1.156768    | 0.4600347   | 0.27522     | 1.126727    | 0.453341222 |
| 0.3906426   | 0.1210984   | 0.2617773   | 0.3359236   | 0.565593495 | 0.1296854   |             |
| 7.30286     | 0.2306092   | 0.28726967  | 0.2498674   | 0.3537949   | 0.2042487   |             |
| 0.2090885   | 0.2777912   | 0.236821    | 0.1935172   | 0.438267022 | 0.346748157 |             |
| 0.364462525 | 0.2013261   | 0.168351787 | 0.462047835 | 0.5036611   | 0.09207958  |             |
| 0.331883543 | 0.8847397   | 0.2042047   | 0.1669956   | 0.945489754 | 0.2039541   |             |
| 4.636887    | 0.2512231   | 0.2341442   | 0.613534    | 0.1389075   | 0.2947345   | 0.2415426   |
| 0.6487111   | 0.9758607   | 0.3028293   | 0.1241004   | 0.260751    | 3.183297    | 0.1811706   |
| 0.25140319  | 0.9729955   | 1.755411    | 0.5419027   | 0.1638983   | 0.1512323   |             |
| 0.1766217   | 0.1877772   | 0.153135053 | 0.3828174   | 0.149532047 | 0.2057927   |             |
| 0.2581978   | 0.1663895   | 0.1307743   | 0.1996795   | 0.407812796 | 0.5934522   |             |
| 0.6447929   | 0.2606025   | 0.198037    | 0.3369493   | 0.252321353 | 1.334249    | 0.2872566   |
| 0.2168956   | 0.3231921   | 3.000772    | 1.025677    | 0.3317444   | 0.256350397 | 0.6361808   |

0.3522451 0.278452597 0.1058181 0.2478607 0.2833955 0.3197283  
0.2729559 0.22928828 0.291390594 0.30345956 4.11691 0.3944375  
0.1607218 0.2998166 0.6378169 0.3919522 0.180728908 0.1615379  
0.729735708 0.09172572 0.570652 3.265443 0.3774452 0.4038248 0.216439842  
0.5315219 0.2313544 0.1936057 0.4698297 0.1878167 0.2807647  
0.1088994 0.583968063 0.1774153 0.255591375 1.729828 0.2392273  
0.199871865 0.5181084 0.1684863 0.2021591 0.150914898 0.3931624  
0.3320914 0.2785224 0.381368028 0.201276 0.2397668 0.573086 0.1502325  
0.321581 0.3895719 0.8972999  
AC016957.2 0.1118526 1.00575199 0.2696408 1.010875214 0.875232819  
0.80128049 1.480618 0.861675364 0.2635509 0.9138122 0.747763309  
0.8127855 0.501331 1.078546 0.3341334 1.840653 0.7275492 1.009706974  
0.5755369 0.5610251 0.687280028 0.7308654 2.090412436 1.608449  
1.053148 1.325150488 0.9395032 0.4198551 0.4004021 0.8012221  
0.2408707 0.905873554 1.253559 2.00168218 0.9448113 0.90954093  
1.758565432 1.738691168 0.9065022 1.610193 0.588641117 1.211268 0.483269534  
0.1732027 1.061782862 1.16809 1.91254 1.367464 0.260551074 0.2991839  
1.151026 2.055532 0.869302581 0.9125585 0.75107336 1.546378 0.2265945  
1.505659 0.3192801 1.181099 0.2611606 1.7223 2.534696013 1.040804  
0.4190662 0.5620344 0.2727794 0.8897134 1.005937 0.06922135  
0.2399136 1.707090759 0.4889046 0.5190596 0.812159932 0.4846581  
0.250963533 0.9519366 0.5555319 1.420445 0.6285353 0.2964985  
1.020779 0.353135017 0.810517793 0.8202107 1.305063 1.265075 0.827736077  
0.5903656 0.4522178 0.5739889 0.700613693 0.6218141 0.8438681  
1.337607285 0.6797101 2.546873497 0.656425297 0.6195494 0.53325761  
0.356956 0.6712238 1.552988455 1.166487 0.1060353 0.902286344 0.7180945  
1.041986787 0.910066881 0.3369504 1.290673906 0.4993351 3.643979  
1.563818 0.6859914 0.9139735 0.758864362 1.659694 1.102474 0.6699582  
0.8583082 0.4274107 0.5964534 0.9702574 0.5120477 0.6053738  
1.183842 2.289579 2.262590781 0.843061117 0.7641839 3.106248537 0.745521248  
0.476774 1.28394468 0.8270537 0.3561377 0.723881235 2.169333964  
0.56838066 1.070937547 0.1889225 0.4983078 0.4562982 1.076732  
1.975909 1.023964 1.164009795 0.3544083 1.161062 0.686467052 0.879651  
0.9537944 0.43790576 1.667142 0.7177333 1.087765469 0.7094505  
0.8703868 0.484249541 0.6357092 1.107003 0.6707308 1.011604877  
0.9731385 1.477388 0.924359723 0.2060393 0.81152536 1.726468 0.7278887  
0.394650865 0.6446432 1.247511638 1.698542 1.845228 0.4002168 0.4897708  
0.7054861 1.300753613 0.6971049 0.3056931 1.847021 0.8177682  
0.4199902 0.5183704 0.8916894 1.437715 0.474317377 0.32663791  
3.240771 0.6914 1.575208 0.5105808 0.744645127 1.896919 1.514753282  
1.204279 1.469442 0.836224957 0.781061977 1.258438 0.2976958 1.182289394  
2.085925 0.6057031 0.4160065 0.5530505 0.8608737 0.7207267  
1.220041 0.3424899 0.3563646 1.05978 1.640521 0.7231358 0.5766198  
0.7188524 0.4093262 1.003807 0.455384272 0.9433057 0.6595758

0.7111976 1.881478 0.9420175 1.46322513 1.767145 0.7007456 0.9429266  
0 0.2799201 1.123970884 1.384373 0.5737357 0.4684355 1.302675756  
0.528942847 0.7506929 0.5012192 0.771027 1.082882441 1.173908 1.944246  
0.782353868 0.7083272 0.560653 0.2683643 0.2169279 0.4389921  
0.6857935 1.672028412 0.5715314 0.296207894 0.486028 1.692477 1.086009  
0.3110744 2.38687 0.3199192 1.349722 1.065699573 1.106264 1.512212  
0.659174614 0.3314902 0.2937585 1.083526 0.3448945 1.288053 1.13202  
0.3750419 0.8650154 1.645887129 0.3693026 0.856040932 0.2746859  
0.9559145 1.333616 0.976207481 1.547408752 2.514288 1.134381 0.9091944  
0.9327351 0.6959151 0.592413838 0.6252765 3.752492 0.4474548  
1.057734976 0.9315539 0.1870652 0.873762526 0.3078463 0.415654246  
0.4058498 0.702634 0.857884355 0.7396417 0.8778798 0.81850881  
0.587827468 0.2873859 0.5558266 0.4639504 0.8735571 1.376963  
1.216059 0.9239347 0.5364859 0.5901045 0.921972391 0.1509965  
0.441573333 0.6716316 0.50816118 1.403439 0.782604 1.22149342 0.5086579  
0.5980116 0.9047104 1.342791565 0.4373965 0.5690518 0.704760185  
1.069867933 0.130334 0.9796734 0.2619249 0.855416906 0.565536783  
2.033872045 0.6514526 1.044713 1.278563 0.3731414 0.6339813 0.261075  
1.112659 0.450802 0.8473829 0.430737 0.7715953 0.702908202 0.6851378  
1.436226 1.107634 0.5889679 3.310741 1.031961 0.4517206 0.8683729  
0.3947262 0.5754045 0.891109869 0.7169 0.7530095 0.9079966  
0.2778801 1.835439044 2.677366 3.527745 0.59982 0.5501706 0.8939108  
0.406546 0.5057003 0.355083933 0.207968 0.3739766 0.350303783 0.7331875  
0.4229702 1.153505 0.1771336 0.7362977 0.517459421 0.680490284  
0.4190545 0.7514083 0.4681471 0.182298293 0.968537385 1.948778462  
1.130694 0.5316444 1.12794 2.629394 1.241909 0.3193533 0.9759569  
0.72695076 2.541558921 0.9595737 0.799980182 5.066954 0.750101094  
0.4847565 1.209786 0.5022142 1.594098 0.7470919 0.5413565 1.229906  
0.7209678 0.2236046 0.923669376 1.179145 0.6042476 0.3879007  
0.8208385 0.86716431 0.2577855 0.7471888 1.197681 1.713895065  
1.053305 0.5085338 0.7106678 0.8114509 0.7303115 0.4212439  
1.341108 1.817366696 2.463946055 1.958457098 0.5394868 1.222407654  
0.241774341 0.6264925 1.017077 1.774934533 0.4837694 0.4913483  
0.6822028 1.261338244 0.359784 0.235746 0.4484865 1.056044371 0.3927525  
0.6546039 0.5382748 0.6472536 0.5361514 0.6071107 0.3917497  
0.4350122 2.478239 0.2782443 0.8788804 0.457967406 0.1404333  
0.2413902 1.72752 0.720882 0.3489776 0.6201695 0.6970593 0.101466067  
0.375893574 0.642495323 0.3803143 0.8701917 0.6291828 1.793243 1.56396  
0.894557776 0.9169855 0.8058493 0.6472777 0.5012355 0.483657  
0.363715109 0.2392514 1.844509 0.5421437 0.9648269 0.4146296  
1.556181 1.287466 0.58236251 0.5766895 1.367027 0.820490204 0.2649477  
0.577153 1.248454 0.7923388 0.5113927 1.158866634 1.352593258 0.689382476  
0.325652 0.6539215 0.4411852 0.2830274 1.392357 0.5561106 0.765152877  
0.8149853 1.576317782 0.2002376 0.5707838 0.4666358 0.5530464

0.2712466 0.81598112 1.363533 0.7550208 0.649828 0.4558401 1.761501  
1.607188 0.3738625 0.663707839 1.228189 0.310901428 0.07048065 0.4244189  
0.429100663 1.369945 1.002613 0.6164389 0.832289293 0.3509391 1.266592  
0.9407976 1.054282007 0.5033958 0.642495 0.1760069 0.2444992  
0.7131558 1.031641 0.2321552  
TRG-AS1 0.04210496 0.511576425 0.241231 0.308808558 0.435657748 0.282982003  
0.7995899 0.939668923 0.04638351 0.1739012 1.773339698 2.871842  
0.1646988 0.6520605 0.4345083 0.8538544 0.1237765 0.230355532  
0.3240233 0.4053106 0.383032024 0.7233966 1.128683992 0.8239063  
0.3955601 0.970056472 0.5198633 0.42488 0.1068773 0.4846447  
0.1030359 0.580776095 0.7308587 0.945793224 0.4345491 1.245021322  
1.243308965 2.198719791 0.9306463 1.736729 1.503688387 1.733732 0.706504955  
0.06789332 0.856477908 0.06715528 1.207393 0.5870796 0.23895835  
0.3173909 0.9719754 0.1101016 0.462246399 0.4918536 0.185965807  
1.208598 0.3528217 0.9313701 0.4469781 0.3810891 0.1608699  
0.4236245 0.391861621 0.4025606 0.3754715 0.6731711 0.3391653  
1.56722 0.654062 0.6158969 0.5357103 0.865494061 0.2046315 0.2316889  
1.394382915 0.5149815 0.294021598 0.6991389 0.1105011 0.04536865  
0.4958436 0.4261537 1.25756 0.349745001 0.665684347 0.8915892  
1.380017 0.2994384 1.761366984 0.4665053 0.623438 0.4976115 0.776816034  
0.2723737 0.8952221 0.367485056 0.4735165 1.125461227 0.800762196  
0.469699 0.951739191 0.659634 0.9267225 0.358729052 0.8270618 0.3962487  
1.812579364 0.4799776 1.602121426 1.553716191 0.371414 1.726462478 0.56817  
0.7402046 0.2581342 0.6022658 0.7812922 2.057835877 0.7873189  
0.8020678 0.5133352 0.04315928 0.5940603 0.7283618 0.5541936  
0.12266 0.4808428 0.4861491 2.262415 1.213045711 0.510654162 0.6649889  
1.052091349 0.65661354 0.1783079 0.938516929 0.5764818 0.1376464  
0.32349377 1.407755274 1.538096574 2.119306451 0.1293029 0.7831108  
0.5031516 0.9009095 0.4642629 0.1513781 0.775143228 0.5312178  
0.915138 1.550451491 3.820302 0.2659911 0.424393239 2.163393 0.4685608  
1.313283218 0.4243409 0.6282061 0.617148283 0.9435323 0.4242885  
0.2216941 0.907768186 0.6473893 1.559462 0.911764592 0.4822817  
1.450643481 0.919049 0.826985 0.187654047 1.298584 0.449466663 1.476402  
1.238756 0.2726725 0.2980978 0.3915007 1.424424941 0.2345813  
0.5748136 0.3025422 1.264571 0.1552235 0.3326106 0.6682704  
0.7380037 0.985587868 0.277851244 2.59377 0.9206086 0.1764178  
0.2146641 0.81544351 1.230558 1.095835272 1.342327 0.5584954 0.617605515  
0.355421279 0.3240837 0.3187229 1.330661358 0.9836699 0.6029921  
0.2969269 0.7065715 0.6950583 0.4322707 2.580567 0.5742994  
0.5414671 0.9120734 1.546415 0.8870681 0.1341816 0.837628399  
0.3160117 0.2667288 1.477341558 0.7101821 0.2788237 0.5322956  
2.41082 0.1467336 0.580300847 0.4060378 0.7294478 0.2333227  
0.01050934 0.4770436 0.325566661 0.9491886 0.5301151 0.8905777  
1.122638796 0.711973864 0.7849592 0.4016957 2.317858 0.335697156



1.740808 0.975837 1.028849911 0.8417811 0.4374451 0.5077293 0.1233447  
0.689743 0.8901319 1.989451177 1.123214 0.973111066 0.3070603 2.024629  
0.4731671 0.2448424 0.5960536 0.444887 0.5542685 1.210330229  
1.048365 0.8150566 0.2560605 0.1683685 0.4282473 0.486931 0.6080417  
0.8800529 0.3385454 0.6160495 0.4132172 0.660980395 0.09813002  
0.889602373 0.388536 0.8341685 0.09996866 1.3870561 0.534584257  
0.2392383 0.9012952 0.829698 0.4506249 0.4662729 0.555306118  
0.4260084 1.626585 0.6201529 1.050688486 0.5454824 0.3840951  
0.985107144 0.3199962 0.533406175 0.3299942 0.651163 0.755576698  
0.451989 0.848429 2.52092785 0.650713063 0.4130563 0.5879226 0.3850152  
0.9070731 1.127419 2.810901 0.6748207 0.202543 0.3029108 0.975976111  
0.380902 0.600668035 0.06435521 0.108352192 0.246401 0.3584615 0.678234399  
0.5663924 0.5484524 0.4167079 0.891137979 1.270801 0.8662397  
0.643942623 1.143589925 0.5199295 0.9019454 0.6233616 0.737688342  
0.66446388 3.296124976 0.3630648 0.3241451 0.437539 0.8674021  
0.7002431 0.2352695 1.312518 0.7983452 0.5219715 0.5464445  
0.3030821 0.351402302 0.2748113 0.2516444 0.2607091 0.3900998  
1.514065 0.9181872 0.2831328 0.2765474 0.1722268 0.4244505  
0.864943447 0.2717517 0.8801053 0.4729953 0.5939037 3.528000947  
0.5970243 1.755839 1.755807 0.3170303 0.4053261 0.2504244 0.3339521  
0.319986318 0.3690623 0.415932 0.460985282 0.5770819 0.3473886  
0.8848195 0.483725 0.7466526 0.58588363 0.422945129 1.544866 0.4474245  
0.8798969 0.245973428 0.480980061 0.839175358 1.581849 0.3742659  
0.4956978 0.1088478 0.4599953 0.2417961 0.6470933 3.617421289  
2.815245335 0.5271784 0.67693972 2.080764 0.35003617 1.012646 0.9777507  
0.3609133 0.4970279 0.7447228 0.4147981 2.981515 0.1809305  
0.2244588 2.117804651 1.003028 0.8776681 0.9936842 0.7534739  
1.018235672 0.3175818 0.3967705 0.4783204 0.878063506 0.6007552  
0.5220782 0.263777 0.1666127 0.9389888 1.514933 0.3689897 1.679194023  
0.311331906 1.519134653 0.2406407 0.450056675 0.206844876 0.3138712  
1.399747 1.893162082 0.3706737 0.7257357 0.3221715 2.712296468  
0.1625213 0.19362 0.4644354 0.509308454 0.1713656 0.2727687  
0.8427324 1.090685 0.4259861 0.4273925 0.7272822 0.3764187  
1.127949 0.1218795 0.7579226 0.335248148 0.006407717 0.1817343  
0.06168806 0.7313754 0.4950673 0.4557341 0.3350426 0.184527151  
0.973951388 0.28937632 0.7613654 0.7796672 0.43516 0.5974581  
0.6596042 1.403478787 0.1839031 0.4528448 0.4347052 1.214422  
0.3678066 0.353296152 0.2456237 0.5119061 0.4335491 0.3090436  
0.0814331 2.858915 0.3732018 1.300374593 0.4847403 0.8836453  
0.850561439 0.0979216 0.4740201 0.897194 0.6753105 0.3337585  
0.556624769 1.561626981 0.188731667 0.03761162 0.9032552 0.174927  
1.436686 1.710792 0.6716732 0.685158686 0.3861655 0.510176573 0.6441219  
0.5250437 0.1512835 0.4388758 0.1701767 0.611038646 0.5168678  
0.5740154 0.93399 0.4043357 0.4323573 0.4698288 0.4639217

0.920701096 0.351524 0.182389769 0.1628052 0.2941131 0.474416379  
0.7984905 0.6399666 0.1725975 0.623437001 0.4323434 0.4060668  
0.6082833 0.657743157 0.7876797 0.2092548 0.07884861 0.8225447  
0.7184224 0.6975573 0.3654523  
LINC01176 0.6377511 3.625535848 0.6788582 1.814740739 2.419551525  
1.744401342 1.30363 1.568197663 0.2732166 0.4852158 0.85270613  
2.001161 0.8835192 2.753843 1.982107 3.727977 1.379167 0.542752929 0.9430834  
0.7970082 0.834626336 2.991824 5.257170532 2.509934 2.263429 1.463342539  
0.7923737 0.8083274 0.4150867 1.9306 0.6450703 1.514053218  
1.540187 6.425289534 1.80221 3.09809401 4.754992843 3.958668007 2.299383  
7.018878 1.399938086 3.985455 0.841668838 0.8814512 1.670741108 1.089837  
4.468432 6.486666 0.486192126 0.4135418 2.487316 2.72387 1.294007929 1.41904  
1.442734905 5.171261 0.6655636 3.576191 0.2557647 2.332219 0.3008207  
4.128887 4.080594461 1.02879 0.4146883 1.262402 0.2042326 2.799393  
2.047036 0.4784002 0.7772263 4.056692337 0.2534176 0.1871638  
2.221303677 1.029987 1.101886199 3.662727 0.2519589 3.99222 0.5144106  
0.5225332 2.721125 0.559896509 6.808868805 1.22542 0.8963134 3.5519  
1.716186292 0.7974769 0.5357746 1.140493 2.842979265 2.17738 2.697352  
2.148352345 1.056958 7.232070251 0.480352641 0.4199466 0.659125261  
0.2220284 2.135511 3.058893642 3.967909 0.659545 1.66851127 3.373696  
3.717902703 2.166425624 0.349308 4.781414998 1.725494 10.68643 4.132395  
1.275166 2.185036 1.817538049 4.865041 3.739141 0.9825041 0.5629262  
0.9884225 1.285472 8.485644 0.914202 1.040455 2.284065 1.928509 9.023932427  
1.340103018 0.7922102 8.146753943 2.257573801 0.405999 2.795169544  
1.917837 0.4560693 1.28014435 6.413512204 0.604334274 3.368925196  
0.5005087 1.68883 1.716934 2.120821 7.285457 1.422434 2.494933041 0.8450342  
3.746827 1.907203521 1.934359 1.121595 1.07135946 2.454163 1.316407 2.119999048  
2.558155 3.035036 1.280989258 2.278339 2.677737 1.034515 2.738286061 3.99496  
4.57314 0.601261457 0.5126298 1.633088284 1.833978 0.9055007 1.636498453  
2.546709 5.270660419 4.578173 7.701507 0.867507 1.831466 1.442953 1.412670823  
0.8631905 0.8172795 4.496458 3.920889 0.4934457 0.1679317 2.565188  
5.630561 2.969945796 0.217682547 7.267763 1.694153 3.364926 2.646531 2.179637226  
2.479485 4.622865168 2.576157 0.6806383 0.944525595 2.144630098 1.105585  
1.146279 2.0427494 2.043611 2.682919 0.8419906 1.688149 1.618504 2.968975  
1.957819 0.3846382 0.2955473 4.628343 3.014853 0.7304347 0.2988836  
1.993453281 4.973244 2.326096 0.755336651 1.813192 0.7642087 3.472354  
1.851723 1.212289 4.467548744 2.856976 1.047433 3.082911 0.1326515 1.247801  
0.769859205 0.8457103 4.817697 1.223031 3.499760727 0.792049164 4.121707  
0.5363627 3.504642 2.685428012 3.357911 3.983113 0.270348851 0.40053  
3.371046 0.3378222 1.366601 0.4946652 1.802753 5.177826809 1.417749  
0.697889236 0.9431093 7.653898 3.707027 1.04807 4.614436 0.8592806  
3.205493 1.432766632 3.043526 5.062274 0.332440405 0.9043356 0.2436256  
1.144458 1.220579 2.923829 1.887863 1.280742 9.772632 3.061212765 0.6981321  
1.06854548 2.626119 3.273749 0.8339046 2.793146805 4.481461976 1.907195

1.329374 2.953289 0.398153 1.328964 0.480631701 0.9133846 5.378923 0.6378146  
1.422521789 0.4292082 0.3232096 1.8610229 0.2991905 0.70020972  
0.4712224 2.480507 2.995695516 1.679587 1.427878 1.97989742 2.887959417  
0.2979257 1.117501 2.685392 2.716784 2.23812 4.259497 2.3535 1.381433  
1.886218 2.952315394 0.469603 0.629430936 1.299692 0.628105186 1.201882  
0.6656869 2.603923299 1.744189 0.5372844 0.709755 1.392038199 0.5441255  
0.5899217 0.547955352 3.359936169 0.48255 1.605308 0.9750428 2.593858304  
3.029101663 5.421764391 0.2894334 0.7460861 0.1577922 0.4144568  
0.9971803 0.5563359 0.8368276 0.7010026 1.283904 0.3349007  
0.6781705 1.203918034 1.982135 0.2977798 1.778398 1.555964 8.164386  
3.328292 0.8133413 0.8818485 4.978633 0.7732503 8.503077721 13.26312  
0.780626 2.178929 0.9427787 6.39600251 2.477111 13.05455 2.20028 0.3863647  
3.397881 0.5820106 0.3683896 1.451975921 0.5081887 0.4523075  
0.808836563 1.621498 1.315448 1.714746 0.605979 1.853732 0.766338787 4.022955314  
1.63896 1.869519 2.414138 0.458961262 3.339077654 2.300839771 1.768177  
1.456591 2.605299 0.5495617 3.306995 1.055271 0.9695937 4.366513956  
5.858896734 0.2419701 1.633507728 7.091257 0.636227111 1.158015 3.308833  
1.21481 5.477933 2.623277 0.8349719 2.714542 0.5813182 1.287807 2.918231712  
7.054935 0.6264082 0.6893604 0.8509426 4.2139097 0.814445 0.5074912  
1.951095 1.62150169 1.161264 0.3338833 0.5667165 0.2435084 2.523652  
1.323312 5.310918 4.999894684 15.46340476 6.654817003 0.7521249 0.87395809  
0.208867809 1.376874 1.225358 2.93102113 2.666574 0.6736809 1.025473  
3.922792779 0.8578516 0.5430932 0.2223601 0.712876487 0.4326039  
0.7185297 0.3313219 1.527084 0.6283122 1.468545 1.184508 0.5637078  
14.62262 1.115336 2.338524 0.681182093 0.2749913 0.7229247 0.8565062  
2.329881 0.4275537 1.184315 0.7883169 0.420749265 0.593797184 0.601601425  
0.4534016 2.760991 0.6179286 4.805365 2.73141 3.37656163 0.4863616  
3.693364 0.4753033 0.6581831 1.578466 0.406058471 1.169265 7.039256  
1.745241 2.22047 0.9157378 7.302096 3.716177 2.364572148 0.3923321  
1.417162 0.80908975 0.3982637 1.367589 3.944353 3.518062 1.344304 3.968804522  
2.574529987 1.399553176 0.3586949 4.591259 0.3785095 0.5379134  
1.557979 0.7121542 1.255923305 1.81973 0.747821722 0.507421 2.461544  
0.5855916 5.082486 0.6092547 3.234350593 2.102189 0.8461741 1.873618  
0.6993858 0.6716703 3.699375 2.106379 1.81242229 2.585049 1.181780164  
0.2922621 0.1099961 2.583481368 7.627778 2.982579 1.016665 1.981275099  
1.265425 4.445919 3.714445 1.366184508 0.7557939 0.5512207 0.4146862  
0.292461 0.7855176 2.876523 0.8343207  
HCG18 1.146054 2.619666702 1.423434 1.802660562 1.884200977 1.405058409  
1.391482 1.845681086 1.397021 1.321311 1.372493281 1.231851 1.71257 2.85004  
1.16494 1.375888 1.517296 1.043556794 1.588172 1.719243 1.797027123 1.7207  
1.969444362 1.643306 1.120566 1.483143245 1.739585 1.31377 1.000228 2.442174  
2.345689 1.50711584 1.404021 1.246039767 1.688979 2.341578756 1.959563915  
2.062276821 1.749785 2.009406 1.82489046 2.087805 1.133035458 1.808391  
1.348147964 1.985636 1.647042 0.5907952 1.501768614 1.367157 2.254038

1.609607 1.950203008 1.026874 1.835848468 1.735438 1.12404 1.707009 1.091147  
1.336443 0.8680918 1.939144 1.787808816 1.231419 1.136218 1.655117 1.213259  
1.601535 2.461816 1.688421 2.410065 2.668259826 0.9635313 1.090389 1.439233425  
1.425531 1.055963278 1.782381 2.250866 0.8866087 2.360217 1.127265 2.142371  
1.875681466 1.917440807 0.737852 1.453141 1.728921 2.465463847 1.741818  
1.386499 1.112309 1.97702705 2.194025 1.996633 0.67264654 2.174213 1.754170916  
1.117503823 1.364738 1.027198913 1.309273 0.9533119 1.499741862 2.424223  
1.752102 1.27036288 1.837596 2.25303174 1.378005928 1.351726 2.153308794  
1.71133 1.252581 0.978963 1.14003 1.263751 2.101360626 1.002506 1.40978  
0.9647319 1.73108 1.581515 1.882075 1.074839 1.646571 0.6629484 1.682019  
1.630408 2.268876659 2.070917022 1.120776 1.177607978 1.814542818 1.399541  
2.409439628 2.17742 1.866102 0.988467496 1.690519453 1.801672096 1.977762064  
2.687116 1.295015 2.067606 1.116899 1.455835 2.107479 1.704982333 1.213554  
1.673836 1.944038389 2.132457 1.882169 1.306294464 2.02238 2.328917 1.374557906  
1.791044 1.208468 0.893274128 1.887941 1.236543 1.34361 1.88216126 1.386239  
1.393326 1.247867004 1.678838 1.627317466 1.606432 1.054028 1.381977959 1.72925  
2.468133387 1.003846 2.307189 0.8889268 1.187242 0.7481551 0.836556266  
2.273507 0.6430649 2.278534 2.073975 0.9758048 1.119238 2.405421 1.612038  
2.55470243 0.793216557 2.143794 1.737371 5.259708 1.041405 1.896642143  
1.365137 1.711271086 1.447693 0.9886463 1.323933323 1.686186019 1.130623  
1.395338 1.946275634 0.8938328 1.117199 2.550347 1.969369 1.627777 1.788863  
1.610931 1.208566 0.7451794 2.115717 1.859752 1.360194 1.480248 2.371686098  
2.717413 1.879779 0.980813569 0.8046361 1.334833 1.759841 1.583127 2.179051  
1.929587149 1.716297 1.842845 1.225619 0.3944929 1.176799 0.906158695  
0.8389563 0.7585612 1.5169 1.774082977 1.815487314 2.091263 1.613611  
1.259957 1.712845302 2.455665 1.057675 1.301776364 2.317409 1.766736 1.524145  
3.507602 1.628081 1.343064 3.33440912 1.662771 1.094331239 1.094916 2.291051  
2.599944 1.373319 1.208624 1.139404 1.119909 2.07780023 2.120595 2.485766  
0.912880153 1.767781 1.060469 1.6604 1.228947 0.9782796 2.175618 1.922144  
1.64888 1.59269975 1.039016 1.778664025 1.740559 1.929274 1.56706 1.859302809  
1.140350851 5.821269 1.684325 1.986858 0.7254177 1.301039 1.120507042  
1.586222 11.84093 1.449465 1.69823887 1.274953 1.232203 1.285428191 1.404397  
1.519506253 0.5924766 2.426302 1.319115363 1.951748 2.167175 1.0639007  
1.930913171 0.752927 1.240711 1.865669 2.05446 1.574345 2.253083 1.166085  
0.841431 1.39322 2.002298335 1.176281 1.330642331 0.8784454 1.294424429  
2.054699 1.758148 1.084906105 0.6591688 1.42707 0.9892247 1.022674995  
1.721578 1.138177 1.268872153 2.54797554 1.145777 1.124479 1.957834 1.454122694  
1.801345404 2.479882333 1.079242 1.398943 0.9199699 1.337298 1.8035  
1.383896 1.276092 1.499218 1.590589 1.215663 1.280566 1.644184306 1.423189  
0.9870766 1.914306 1.709738 17.13073 3.248574 1.489116 1.207177 1.629387  
1.333518 2.017508411 3.044125 1.138167 2.168854 1.405253 1.517117731 0.5928715  
2.02424 2.381113 1.091053 2.058303 1.301023 1.657989 1.241589007 0.6679499  
1.964322 2.410835399 1.573939 2.116074 2.146889 1.292936 1.559161 1.64125343  
1.07910949 1.817434 2.289101 1.819647 1.45820671 2.113429057 1.621072777

1.644049 1.303786 1.615605 2.200227 2.640941 1.538371 1.707095 2.154669197  
1.564828799 0.7726886 1.804909847 12.76869 0.646065465 1.8145 1.532231  
1.895102 2.732108 2.057167 1.481059 2.165894 1.169769 1.486513 2.084951069  
1.952085 1.427634 0.836198 0.8708022 1.73859653 1.854107 1.205626 2.140264  
1.450793688 1.142946 0.6424036 1.187413 1.436371 1.94302 1.784153 0.8220168  
1.601312458 1.876550379 2.492576076 1.181053 1.347046461 1.241078175  
1.589445 1.946154 1.451805698 1.476638 1.208103 1.325938 2.441073182 1.613387  
1.524138 1.151236 0.846933208 1.381942 1.45107 1.36719 1.211639 1.475687  
2.237027 1.701635 1.71901 1.625711 1.55063 1.892946 1.465523168 1.768314  
1.457676 2.055902 1.564402 0.9916107 1.48757 1.25964 1.967691425 1.259640486  
1.575947995 1.45983 1.695011 1.657486 1.205974 1.701474 2.145216793 1.704696  
0.9651835 1.574214 1.968775 1.231124 1.369691913 1.558717 1.494321 1.014427  
1.546052 1.276314 2.452227 1.681143 2.075717732 1.49331 1.838563 1.436328752  
1.299496 2.104873 2.099064 1.606766 1.156195 2.264491966 2.296705576 0.428779588  
1.496787 2.322626 1.685139 1.500261 2.036014 1.538681 1.875138268 1.79397  
1.139485553 1.465372 1.893254 1.084879 1.538185 2.263225 1.927239213 1.563566  
1.704565 1.528039 2.635155 0.5563642 1.327772 1.851025 1.595844708 1.908203  
1.426114227 1.468639 1.09578 2.1026108 2.240184 1.084967 1.237726 1.823680664  
1.728233 1.722138 2.657508 1.200711682 1.731328 1.294522 0.4864706 0.8812101  
2.19022 1.474952 1.752072  
AC010973.2 0.4498353 0.740673528 0.1858987 0.798918155 1.151969404  
0.309359414 0.573317 0.396043744 0.02595717 0.1075627 0.28354212 2.41655  
0.2765064 1.666177 1.08782 1.092753 0.5302575 0.270714571 0.4991911  
0.415439 0.203070893 0.5943214 2.93576742 1.295679 0.7437816 0.556104157  
0.3403288 0.2274337 0.1242223 1.164492 0.2906115 0.484334982  
1.173662 1.646049783 0.2605528 0.875901179 1.124915881 0.997055694  
0.4919981 0.8292437 0.608741058 0.8471884 0.199908568 0.5536342  
0.562091322 0.7731046 2.007366 5.056687 0.191607424 0.1203222 0.7935526  
7.554012 1.10644441 0.6094852 0.350285385 0.9285567 0.3645162  
1.419103 0.1800995 1.706123 0.4601334 1.224513 1.665262551 0.1168125  
0.09192819 1.275468 0.1253751 0.7640546 1.181559 0.3022478 0.4548606  
1.095441955 0.1166767 0.2333841 0.524188054 0.3508452 0.651376991  
1.792189 0.1436253 3.220806 0.1596485 0.4088304 0.6911892 0.186176969  
1.984689266 0.8648496 0.2474314 4.300339 0.415030418 0.2220089  
0.1113475 0.1319086 1.255864284 0.6287569 0.8605625 0.766325062  
0.2510428 2.633839909 0.146416432 0.1478549 0.070700821 0.3609415  
1.324458 2.061055573 1.269147 0.8187653 0.168125427 0.4950766 0.751790807  
0.383428359 0.1711714 1.8320039 0.2008166 2.780964 3.403554 0.3750933  
0.4372272 0.865960611 2.387131 1.107277 0.2253121 0.2173754 0.2946702  
0.5735345 2.201373 0.25496 0.7248943 0.7368265 1.545621 2.014870815  
0.774976507 0.3010583 2.891999194 1.027970762 0.1878301 0.885191129  
0.6152119 0.02888616 0.058713657 1.920284061 0.452145216 0.789257253  
0.376275 0.3699756 1.106877 1.261965 3.061557 0.6212381 0.965174107  
0.4886801 1.316906 1.344091325 0.6615912 0.3042513 0.724573823

1.229835 0.4694518 0.539956166 0.8293725 0.7819114 0.207221334  
1.114477 1.407683 0.3270793 0.955739675 0.9258583 1.047248 0.249914569  
0.1609898 0.641768692 1.660515 0.4014632 0.128882131 0.3363307  
1.541640399 1.092959 3.6616 0.4515084 0.6029699 0.565257 1.281113895  
0.2403028 0.2994929 1.416471 1.127589 0.6756265 0.078177 0.6301271  
1.528108 0.850223539 0.080426524 2.279886 0.2455586 1.382178 0.6034461  
0.654309571 1.042445 0.897918031 0.5666901 1.056188 0.215119149 0.858670464  
0.5440917 0.1319404 0.543404556 0.3160662 0.3290106 1.488669  
0.8579028 0.6538702 0.5753477 0.7143877 0.1574154 0.1670683  
1.290288 2.10782 0.1534007 0.1060105 0.693838674 0.8014541 0.8345379  
0.141280194 0.5148557 0.597393 1.107178 0.4597491 0.2351478 1.506279376  
1.914509 0.1685287 1.383509 0.05293119 0.2894784 0.456637648 0.2726942  
1.127321 0.2511864 1.087845385 0.324150702 1.706001 0.1226167 0.9949897  
0.892959396 1.154043 0.6914883 0.410955373 0.8287027 0.9740593  
0.09250933 3.255737 0.1973835 0.6754389 1.344872717 0.3377412  
0.185649885 0.2319803 3.196143 1.552241 0.3753125 1.890195 0.290741  
0.6090809 0.929887859 0.9826999 1.86793 0.184238653 0.9983571  
0.1620209 0.3382717 0.3771697 1.43921 0.08483147 0.5475505  
1.947325 1.151412574 0.1048388 0.180667673 0.5891727 1.306306 0.3064787  
1.009541395 1.032963737 0.1268362 1.139113 1.002923 0.3782685 0.4292817  
0.284124106 0.1077712 0.6387862 0.1028297 0.946034816 0.08325359  
0.1576282 0.492871811 0.2122388 0.143282439 0.3021898 0.9557428  
1.011694173 0.5220731 0.3860998 1.31671227 0.898634228 0.297199  
0.2554694 1.159499 0.5678425 0.7735206 1.816509 0.6915882 1.909006  
0.4237878 1.13002 0.1487167 0.215640961 0.6636958 0.188645701  
0.6029812 0.1383465 0.498164544 2.131083 0.2198868 0.5057313  
0.214909033 0.3317101 0.1082267 0.15791212 0.650823534 0.7445236  
0.4902221 0.1887872 2.37374714 1.115543017 1.953084097 0.192485  
0.1920687 0 0.1561907 0.1507194 0.2399909 0.3309064 0.3625963  
0.6516211 0.3712043 0.2197233 0.126419121 0.5931902 0.5809047  
0.6332603 0.1440832 1.037512 0.1976294 0.1557151 0.2321424  
1.031851 0.5877062 1.70344905 1.862954 0.1797051 1.054927 0.1741628  
1.570326064 0.6152863 6.080341 1.187586 0.2814195 1.039989 0.1067754  
0.2544169 0.557613288 0.2765177 0.1933733 0.120755125 0.4549339  
1.522846 0.570188 0.2198185 0.3418708 0.203858578 3.043141784 1.103107  
2.210321 1.208263 0.25136415 0.729854906 0.914359109 0.4624364 0.2748991  
0.4774964 0.8625349 0.7051147 0.3164973 0.3364274 1.695175469  
1.060559803 0.3397199 0.53481799 0.244532 0.399610398 0.4213903  
2.005302 0.2539108 1.160077 1.005214 0.4096404 1.053081 0.4418288  
0.5138664 0.591320046 1.9046 0.1234332 0.2292263 0.6158448  
1.419893432 0.2962089 1.08356 0.6442418 0.791565459 0.3342739  
0.2571058 0.2449782 0.161943 0.5274755 0.2552163 1.091029 2.104311357  
4.142264682 1.237702426 0.3206369 0.290608828 0.25003005 0.6565234  
0.03790293 0.736382653 0.6507816 0.1092744 0.2351658 0.853794544

0.16123 0.3070022 0.107548 0.152386664 0.3723166 0.3849359 0.1623577  
0.723211 0.289283 1.156025 0.2925914 0.2249331 1.722812 1.240502 0.5857297  
0.329464569 0.2581841 3.180507 0.2330229 0.5700863 0.2734044  
0.2362854 0.229365 0.119920871 0.111065418 0.328644867 0.1573203  
0.7817361 0.1483978 1.702852 0.5925477 1.518118812 0.2499388  
1.301221 0.1394541 0.1151891 1.333792 0.067511347 0.4241502 2.459477  
0.2754099 0.7450032 0.7830037 3.229932 1.879663 0.886642976 0.2112184  
0.5235947 0.262140356 0.08219841 0.6063346 0.7685024 1.308969  
0.7177317 0.841759806 0.963093992 0.574298572 0.1683859 1.13733  
0.4195403 0.1192448 0.4723484 0.3833998 1.157613405 0.2593274  
0.386813657 0.06135556 0.6296256 0.3725099 0.85532 0.301287 0.992757518  
0.6508122 0.3095071 0.39201 0.7668194 0.4187701 1.596336 1.131869  
0.758914314 1.462571 0.326621028 0.3765844 0.03657594 0.785101251  
2.224103 0.5409644 0.424992 0.65881424 0.1683118 1.34814 0.6762156  
0.391383239 0.2273819 0.3207612 0.1323759 0.2463647 0.3841185  
1.606433 0.971  
LINC01089 1.404094 3.255616449 0.4822286 2.297233197 1.861535401 1.486580866  
1.669168 1.076755911 0.3477079 0.2927444 0.548625181 3.499449 0.949989  
3.44728 3.066753 3.364797 1.07932 0.732943509 0.7201265 1.010654 0.757633323  
2.334517 4.742945029 4.81943 2.113904 1.702689258 1.267983 0.4492932  
0.8628219 1.782096 1.425327 0.884021772 2.363025 3.246806519 0.9850184  
3.016233891 4.263899451 2.80126049 1.892058 3.674828 2.469403285 3.735988  
0.329278247 4.213811 2.031204857 3.98901 4.048082 2.933977 0.509768722  
0.3581711 2.295679 6.463502 2.99628556 1.937199 0.766170957 3.112168  
0.5076623 4.19696 0.3931503 2.285428 0.4466445 5.368223 4.008517605  
0.7699591 0.4495659 3.147955 0.2643587 3.257855 4.121272 0.1988857  
1.009356 6.114814607 0.4360786 0.2871551 1.188020811 0.9349725  
0.3090277 2.911669 0.5451124 14.19999 0.3122982 0.2373136 1.986431  
0.528626691 6.366827354 1.039684 0.5925845 4.716577 1.725767439 0.98396  
0.2784226 0.3075844 4.334096487 1.701511 3.214745 2.605947803 0.5629628  
7.669885042 0.772638852 0.4939233 0.61875196 0.4639622 1.515289  
1.450157468 4.612098 1.497182 0.525493682 1.733981 4.883607853 1.096413443  
0.4804208 5.196357072 0.7045314 6.666615 7.645886 0.8592697 1.213479  
2.620725422 5.78458 4.941363 0.5265008 0.5428248 0.5836516 1.526887  
2.722561 2.889872 3.325037 2.72989 4.522639 4.933674477 2.875004356 0.7804237  
8.211058221 3.096266318 0.3214977 4.021021408 1.648208 0.3138538  
0.196623967 5.106139204 0.672965411 1.925020697 1.365639 0.8259983  
1.657862 3.231761 5.493208 1.441599 1.898181693 1.283761 3.424341 2.710567984  
2.609459 1.668213 0.546411431 3.00744 0.6307402 1.455520757 2.386553  
3.583372 1.079486742 2.165719 3.988401 0.4599604 3.060312397 1.61769  
2.809943 0.312453694 0.1465878 2.037755383 5.437262 1.140289 0.988969692  
1.308683 4.574611894 3.102429 6.987681 0.459212 1.109249 1.334371 2.521198247  
0.5881565 0.7165182 6.269387 4.290117 2.011183 0.2160922 4.634454  
4.446369 2.947545013 0.402210475 5.157883 0.9459619 4.888326 1.067811

2.14549614 5.467125 2.84430625 2.965813 4.32464 0.317618322 2.68603088  
0.5909476 1.475016 1.482789537 1.133731 1.2054 1.55303 2.67043 1.985347  
1.366248 1.615504 0.486161 0.5704593 2.836702 10.49829 0.7610633 0.2958456  
1.980567101 2.368941 1.114872 1.257001659 1.076857 2.110072 4.383427 1.740034  
1.016638 3.167484918 4.766476 0.6622053 2.49584 1.328788 0.9076675  
0.724961997 0.8675545 3.055518 0.2919681 2.507770275 0.506583533  
1.988552 0.6570021 2.982139 1.821473918 2.511796 3.277605 2.110224015  
3.004277 3.585313 0.3383224 0.6061512 0.481803 1.382304 3.572239915  
0.9802423 0.198949102 0.946311 6.861279 2.065706 0.4575272 2.594888  
0.6774527 1.06771 3.622398475 3.881438 5.3147 0.621560217 1.657806  
0.2984222 1.514629 1.161798 2.935128 0.5201984 0.5795307 4.836649  
2.434012229 0.405705 0.889171781 1.484491 2.084412 1.581347 3.36178262  
3.059769632 4.467814 2.297697 2.968881 4.166263 0.9847127 0.750621919  
0.4403844 3.108981 0.4706289 2.951064255 0.5558395 0.3967061  
1.219376628 0.3751225 0.66643499 0.7129756 2.583905 2.789184106  
1.781782 1.05614 6.38325939 2.989733203 0.6708916 0.6498585 3.070696  
2.427935 2.539827 4.288046 3.228903 3.292395 0.7569104 2.682635209 0.1815049  
0.475770687 3.790525 1.07096416 2.16227 0.4900721 1.723011375 4.239864  
0.4009128 0.3462522 1.446783167 0.4263875 0.1610829 0.390517648  
2.460434277 2.644243 0.8107094 0.6817008 3.901711359 3.76562214  
4.427489955 0.6366476 0.4097497 0.03748519 0.3446049 0.3948177  
0.3750584 0.5059478 0.5011335 2.173828 0.3504392 0.5748887  
0.940800573 1.59902 0.8017282 2.170601 0.6979407 4.035552 1.094232  
0.4049766 0.6219305 1.437904 1.78008 2.298472159 1.629721 0.8261853  
2.256856 0.3836472 5.151020456 1.406168 8.165511 3.254247 0.4334292  
3.829625 0.3337376 0.5834321 1.368392725 0.536558 0.5660333 0.529386303  
0.8075236 3.65546 2.228845 0.6943364 1.514169 0.892053957 1.532433995  
1.477662 3.901504 5.730111 0.347402914 2.889106091 2.594074202 1.128783  
0.8884513 1.11275 2.384789 3.0335 0.2785454 0.5257696 4.923279299  
5.12675698 1.048524 3.044754281 4.575464 1.16855492 2.872099 3.539329  
0.8726438 4.410502 2.188574 1.474124 3.651809 0.4000465 1.111553 2.459797162  
3.595324 0.2158661 0.9818306 1.501264 3.003175528 0.8792254 0.3225505  
3.430355 1.236206758 0.8681 0.5461774 0.5777847 0.5916269 2.47302  
0.7806771 2.840396 3.218092819 6.558144063 4.365398134 0.5879482  
1.085668727 0.293577556 1.280592 0.1579594 3.175233482 2.709694 0.3903414  
0.8050389 2.932192378 0.395031 0.6504632 0.3641652 0.987882567  
0.4282067 1.023375 0.4729445 1.951289 0.3157469 3.992999 0.7939283  
0.4782668 6.209191 2.672438 2.365859 0.326913052 1.815708 2.075172 1.105994  
2.262685 0.8008395 0.6028855 0.4064083 0.404573315 0.528985342  
0.684809367 0.3395217 2.635515 0.5946574 2.478946 3.183652 4.42493791  
0.8884349 6.088685 0.3846801 0.3497488 1.139648 0.198094594 1.869344  
5.420251 1.545967 2.384028 7.22554 5.093129 4.631679 2.345517157 0.6768285  
2.005423 0.599622525 0.3262473 2.594568 2.24495 3.666389 1.934113 2.386806912  
4.081928242 1.255637104 0.6056718 2.421748 0.6931248 0.5679422



1.628321 0.543792 2.346732187 0.7891118 0.855365837 0.4246407 1.321345  
4.919373 1.613545 0.49482 2.920730098 2.044945 0.7203129 0.9377055  
1.219904 2.555491 3.454924 1.627944 2.295655297 3.013241 0.710975801 0.2061201  
0.4028487 1.63933133 8.148823 2.983574 0.5117913 1.976951907 0.2630382  
3.2196 2.678437 1.160895677 0.4809289 0.6365541 0.6403349 0.9263623  
1.230332 4.475347 1.692972  
SCAMP1-AS1 8.248295 4.780995561 2.05068 3.60520544 4.041321235 3.496015397  
2.783403 3.8510392 2.690304 2.615668 4.723927939 2.435937 3.677173 3.582136  
4.436052 3.871215 3.718296 2.247466152 3.057374 1.740402 4.200122538 2.323443  
2.381438771 4.598894 4.388039 3.012711115 3.918388 6.570679 4.177945 3.340617  
27.06158 3.910541246 2.043252 2.350942991 3.201223 4.201599577 4.46116194  
2.798967792 3.376996 4.507535 3.432760842 3.82957 3.622450353 25.98195  
3.678657778 4.256228 3.566132 3.549265 2.63854489 3.716425 2.853825 4.44062  
3.016686932 4.115934 3.303302687 3.611629 7.997403 4.06756 2.389936 6.933179  
8.980505 6.129605 4.106367291 2.897869 2.406739 2.936671 4.381655 4.70514  
3.861081 1.452206 5.023727 2.877081053 2.72289 3.684396 3.368982575 2.740698  
3.31828096 4.89453 2.029149 7.886854 3.428294 3.619929 4.839096 3.902475785  
4.602583181 4.817445 2.779085 11.47415 4.023791694 3.157721 4.394559 4.149746  
5.067831952 3.949507 3.552377 2.041566853 4.916628 1.938827223 2.585536509  
5.435099 3.396953523 2.2297 3.647299 0.992110035 3.536239 3.191285 2.296431966  
4.677846 5.962864586 2.719516987 2.584764 3.682555671 2.707518 1.567621  
3.163227 4.723794 3.239377 4.272116645 5.768561 4.927228 3.14714 5.545378  
2.349291 4.449155 2.596226 16.19427 1.786678 3.594686 5.913894 4.758623469  
3.563940509 3.022133 3.366998949 3.305097488 2.989416 3.463211499 3.56356  
3.886091 0.604501661 2.496694877 1.600001969 2.68245456 32.02537 4.434974  
1.687428 3.13358 3.344895 3.227132 3.394279527 2.524052 2.6674 2.728706531  
6.723285 3.327858 1.898165073 3.084658 2.24686 3.047297264 4.70011 11.80721  
3.366190311 6.119674 2.153603 5.945432 4.538840928 4.54056 4.834766 4.631508276  
3.380026 1.795883459 1.220441 3.823366 3.784234447 3.751344 4.722722631  
5.613024 3.272558 2.995778 2.623928 2.156465 3.185150357 2.318323 2.565782  
3.221169 3.386072 7.631822 2.851616 5.801952 4.100982 3.591260142 4.55980689  
3.630514 6.92036 2.586351 4.452603 2.584095888 4.332133 3.704598126 4.269591  
4.068601 3.502360631 2.996835288 1.917746 3.461473 3.149643966 2.798561  
7.565225 2.615429 2.762509 2.727359 4.505558 4.389372 2.957798 2.758898 2.646228  
6.092919 4.053732 2.492165 3.359190846 3.323875 2.933922 2.564382683 4.203466  
4.44925 4.722541 7.269251 3.896698 2.589457486 3.394728 5.082006 6.876154  
22.77961 6.755573 2.231992563 4.76121 4.588349 4.482667 3.498975285 3.810172631  
3.512915 2.838558 2.357563 3.978910482 3.394784 4.527206 4.169393947 7.882057  
6.25068 3.192988 3.419148 2.492848 2.515086 4.483623807 3.631849 3.988468142  
4.151711 6.117051 3.685145 3.821192 2.503218 3.364994 2.740637 5.184878195  
4.500085 2.698409 4.603087588 2.897891 1.960051 3.695599 2.616972 2.637772  
3.784752 3.403348 3.658977 3.768294889 3.741904 2.835635587 5.863781 3.457265  
3.225551 3.446186732 2.475722422 7.225841 3.71096 3.222048 6.101479 2.833859  
2.242709529 3.584301 3.770692 2.064485 2.624428336 3.893951 1.85896 3.540865898

1.657079 2.741416033 1.682392 4.259549 2.820375445 7.333522 2.349301 4.64796073  
3.87016842 1.39395 4.630836 3.448732 2.09052 2.23635 3.958445 5.371549  
3.423188 2.827364 3.771489044 3.450194 3.665485779 9.344075 3.62553457  
3.734515 4.064237 2.426089924 6.08241 2.952504 1.261224 2.155916942 2.059474  
2.330695 2.142754125 5.137220365 11.33956 2.878778 7.898778 2.438892887  
2.245035157 4.548756559 8.132633 5.229371 1.123635 2.762151 3.76563 2.175755  
3.530821 5.439812 2.421385 1.870877 2.500346 3.658888229 2.231819 1.359285  
3.649863 2.769099 4.011676 7.135172 2.01385 2.205585 4.070467 1.795095 5.079398583  
3.509905 3.714106 3.707953 3.861225 3.16028801 2.206976 3.423284 6.855909  
1.679668 2.749574 4.699651 3.550763 4.732867249 3.353086 2.765173 3.127001504  
4.568238 3.580561 2.894062 1.894381 2.922517 3.344213515 1.592682255 3.443253  
4.551387 5.7258 6.72876019 4.743138334 3.445403588 3.645668 4.034293  
2.856071 2.749428 4.159918 2.824103 3.49264 4.704753539 2.943454869 2.871774  
4.795119304 3.90834 2.920340824 3.829877 4.31193 3.604433 4.009229 3.866071  
3.755189 2.919432 4.321515 2.351398 4.246051568 3.124734 2.689941 2.73592  
4.021419 5.68084566 2.346813 5.87675 3.705737 2.503986427 2.033315 3.818241  
3.324178 3.041606 3.727476 3.153174 4.950125 5.623102313 3.30060466 5.830927142  
2.676173 2.533259212 3.04142767 4.209806 2.367452 2.504907213 5.13689  
3.547699 2.8651 4.568870169 4.15422 4.846592 4.364561 2.394080658 3.589346  
4.810514 3.382991 1.869423 3.011481 4.008428 2.796172 1.25718 3.342303 6.609793  
2.890496 2.704247754 7.56849 2.703427 3.89195 5.317641 2.822413 3.150974  
3.568468 3.333626214 3.726972 3.403263674 2.879523 3.855825 4.011632 3.714574  
2.880344 3.267142902 2.876052 3.773253 2.775853 3.621128 2.398932 3.230469638  
17.39501 2.186916 4.469374 3.643427 7.575361 3.224688 5.351818 2.285036233  
5.773492 2.934994 2.26331651 3.234728 1.93783 3.938575 4.202225 5.946245  
4.201076316 3.462654579 2.310764921 42.04127 4.128278 2.526899 2.477753  
4.497139 2.561935 2.071909503 4.697174 1.20108354 4.990446 6.666143 13.98131  
3.762957 1.219399 2.941431942 4.847599 3.3218 5.381388 4.383228 2.203684  
2.990614 3.246044 5.392915265 2.192697 2.536120239 3.893899 5.03358 3.155186607  
4.485661 8.28226 2.254105 4.295895312 4.353907 5.699265 2.898529 2.379375464  
2.710712 2.893601 2.294233 1.993609 4.155167 3.408895 3.801126  
COL4A2-AS1 0.2927499 0.466641833 0.3326997 0.967956393 0.3331975  
0.98147957 0.2229566 0.571329772 0 0.1750029 0.029356634 0.1861379  
0.1836976 1.254605 0.3498088 1.204378 0.7181565 0.381721868 0.2915504  
1.17469 0.400876986 2.118885 0.85107601 1.834572 0.3630362 0.678579477  
0.3000748 0 0.1257559 0.6121048 0.3467349 0.348381303 0.7047902  
0.795313616 0.8012 1.519002866 0.313171026 0.637941377 0.696628 0.8225562  
0.38062894 1.405929 0.060712973 0.8901569 0.565722403 0.2934934  
0.7620556 0.260294 0.218219566 0.1957623 1.934828 0.4491056 0.385035825  
0.7165275 0.208140591 0.3916751 0.1186124 1.107397 0.09116146  
0.397449 0.04556876 0.6198152 0.046828371 0.5321457 0 0.5884014  
0.1665863 0.3431669 0.8191004 0.2174063 0.5180357 4.598542605  
0.08858785 0.1417593 0.461311961 0.4947102 0.023182688 0.488715  
0.08178665 0 0.2077965 0.186245 0.6870002 0.032620751 0.702241725

0.03788337 0.05123581 0.165553 0.384047244 0.4775932 0.07608743  
0.1001528 0.754438617 0.9330795 0.4141205 0.236680433 0.2287279  
2.347552962 0.15159277 0.1496803 0.193248912 0.1494808 0.03634724  
0.975506822 0.9445303 0.1332118 0.191476181 0.8157645 1.065501045  
1.005692564 0.1670959 0.476902602 0.2613804 0.9486326 0.3370669  
0.1485877 1.259529 0.534209497 0.7639256 1.068699 0.1283027 0.08252215  
0.3872268 0.6162189 1.49596 0.6700871 0.2001392 0.6971513  
0.2996239 1.036322444 1.478375322 0.2285813 1.167375202 1.201553544  
0.2139177 0.725856726 0.4443197 0.1315925 0.066868332 0.672920056  
0.045772726 0.753896265 0.09889279 0.270875 0.4511657 0.2113586  
1.887336 0.9969616 0.790454699 0.1669657 1.470401 0.344962406 0.2511596  
0.827149 0.192548784 0.9424907 0.8670055 0.614950078 0.4843913  
0.04141908 0.236002075 0.4278424 1.120305 0.2569014 1.02964447  
0.5501477 0.2287369 0.170774955 0 0.337339954 0.7029023 0.07620366  
0.358801488 0.1641614 1.589422236 0.266734 3.225256 0.2856766 0.2472176  
0.2095979 0.324232529 0.2432695 0.02526586 4.171515 0.8828868  
0.08793869 0.07631564 0.8051625 0.9720845 0.923618905 0.03663875  
1.557922 0.2303115 1.124391 0 1.215226238 0.7339234 2.512110047  
0.4202585 0.3927775 0.391994894 1.955860502 0.3014562 0.06678466  
0.378202862 0.1079893 0.2017651 0.1555439 0.9167438 0.7332288  
1.131808 0.3411905 0.08963933 0.02238497 1.097695 1.483281 0.08735315  
0.2112849 0.536210642 0.7713525 1.43726 0.071512197 0.1851674  
0.3452595 1.188898 0.2244013 0.2550545 0.472151792 1.651828 0.2815054  
0.189839 0.2009425 0.2197892 0.157593801 0.03882104 0.09009776  
0.02724508 1.037247926 0.092292908 0.5676021 0.2792935 0.3415071  
1.200371647 0.2731068 0.4119379 0.555788604 0.6067288 0.563477 0  
0.524088 0.1498652 0.4230874 1.009886106 0.4167038 0.084573836  
0.2935553 1.579282 1.996608 0.1017712 0.3039138 0.2283598 0.3468377  
0.209192879 1.302933 1.286314 0.027976981 1.589085 0.1153274 0.2568359  
0.8404325 0.1394979 0 0.2078664 2.744511 0.874220658 0.1023427  
0.301781928 0.4792873 0.8041821 0.8643023 0.521222483 0.771430113  
0.6741109 0.5421649 1.110489 0 0.7764948 0.080896447 0.2008464  
1.673265 0.08783372 0.359142847 0.4063568 0.09792053 0.124739162  
0.09064363 0.326365556 0.05098676 1.252503 0.389977839 0.2765503  
0.7606049 0 0.882971758 0.05641278 0.05290022 0.728574 0.5095287  
0.3470425 0.8969633 0.4767307 1.684963 0.5791766 0.611309431  
0.06774872 0.260037629 0.6328262 0.122769425 0.5429947 0.1890736  
0.594370924 0.03072236 0.1252133 0.2303887 0.640135026 0.03434372  
0.09244367 0.138341814 0.444729415 0.1169558 0.173696 0.1121779  
0.839575852 1.011449737 1.026621128 0.146146 0.3645749 0.09561037  
0.1674201 0.2059832 0.09110766 0.03426051 0.353963 1.023619 0.3140506  
0.263411 0.287954664 0.4003424 0.09021626 1.803033 0.3878604 4.017479  
0.2700935 0.3733519 0.2782994 0.4390719 0.334666 0.985921559  
1.428898 0.09096184 1.742756 0.3173634 0.937621873 0.2712553 1.016811

0.4588936 0.2508304 1.783959 0.1216053 0.279021 0.46467774 0.1399658  
0.5138715 0.30005819 0.1535168 0.5904177 2.700057 0.4450647  
0.8259001 0.208955042 0.519870055 0.5982461 0.9439915 0.2073541  
0.163586193 1.273363879 0.382537994 0.2407605 0.1490855 0.9322549  
0.5993886 1.223691 0.2507515 0.09578836 0.805822542 0.157546927  
0.08145331 1.560814307 4.137637 0.107085139 0.3640748 0.5254798  
0.2628875 0.880799 0.9839834 0.3939628 0.6230347 0 0.1950789  
0.483501006 1.269733 0 0.2610633 0.3791237 0.978771569 0.5975896  
0.1618432 1.901471 0.47035049 0.6038702 0.1330977 0.1287706  
0.3018028 0.8191854 0.1403201 0 1.097668774 0.625042042 0.982452347  
0.2044951 0.430262515 0.06327921 1.101884 0.2158361 0.764658784  
0.2223504 0.4231349 0.1874794 0.540209511 0.0282497 0.1234028  
0.1224852 0.115700985 0.07709586 0.211641 0.1056613 0.1752462  
0.2196408 0.1815978 0.5126601 0.3171676 0.9405068 0.2330382  
1.173143 0.15634314 0.2695394 0.3369529 0.383337 0.2663651 0.2989222  
0.1281442 0.2736603 0.068288274 0.196764044 0.325469554 0.1791703  
0.7453763 0.3120158 0.5313312 1.681584 0.972544864 0.3013968  
1.332086 0.1270582 0.3148501 0.2250431 0.043935956 0.2952033  
0.5411161 0.4256832 0.3636325 0.1698579 1.183304 0.7928619  
0.914524831 0.3679065 3.140599 0.439966563 0.08321321 0.2589554  
1.237004 0.7043011 0.1720877 0.942422231 1.149088334 0.40596968  
0.09588643 0.9802218 0.5255908 0.1728447 0.1041198 0.1284264  
0.634163743 0.5906902 0.125867936 0.1746929 0.5019515 0.1157038  
0.516398 0.07099293 1.469832658 0.3843274 0.4165841 0.5740147  
0.4867697 0.1589775 2.438324 0.8678907 0.635528735 0.9059102  
0.488230391 0.08301055 0 0.622012585 2.879993 0.2395938 0.1320051  
0.532482477 0.1916885 1.326012 0.7858514 0.350225875 0.1362962  
0.4870818 0.05025382 0.0590699 0.5949568 0.8100294 0.2430464  
AC007406.5 2.034658 3.656587735 2.869785 3.957323297 3.02952206 4.908588675  
3.456179 4.635710769 2.366851 3.714478 3.530575077 3.016793 3.741669 4.562884  
3.148279 2.958895 2.040784 2.631018673 3.680156 3.262821 4.202350347 3.098117  
2.878853776 3.297248 2.370615 3.891664003 4.660153 3.18492 2.966967 4.309836  
5.203112 4.925694009 4.972095 2.825710927 4.55951 3.819570932 4.602455523  
3.664399667 4.318501 4.982044 3.140060108 4.850965 3.299185067 3.403376  
3.844620521 4.199641 2.695547 1.518655 3.680131858 3.321413 4.328065 2.610692  
2.89190945 2.9828 2.842399431 4.403565 3.990541 4.721143 3.96768 2.723215  
3.555226 5.245588 3.278576849 4.234623 3.770754 4.153381 3.603939 2.964628  
4.504867 3.104727 4.957811 4.73170265 3.118739 4.902098 2.805879286 4.839181  
1.95875431 4.960789 3.863839 2.262994 4.451236 3.521616 5.519841 4.439920896  
4.717701999 2.561967 3.857717 3.012855 3.306291706 3.670617 3.080461 2.883263  
3.941168298 3.334197 3.748247 1.385924463 3.071591 2.399391671 3.047158141  
3.403928 4.054569433 2.349018 1.863685 1.620202971 3.217958 3.188259 5.962459554  
4.050364 5.373841796 4.219801175 2.917589 4.640773827 3.517504 5.582906  
2.091668 2.822228 3.662437 4.942053598 4.125964 4.442013 3.885995 5.440214

2.642915 3.472442 2.307649 1.240401 4.112481 4.948234 5.512324 3.80809969  
3.961731242 4.419479 2.144834925 3.164683854 4.090416 3.791857218 3.330295  
4.018137 1.446634134 3.231130724 5.122791031 3.339023207 4.217138 3.229992  
3.883424 2.909147 3.460234 2.777533 4.102665608 3.763839 4.473546 3.165873436  
4.28556 4.089977 2.661494508 3.576708 4.150139 2.409362768 2.59921 2.511799  
3.591400662 3.308828 3.099514 3.417842 3.452812271 3.155106 2.978012 3.995164256  
3.329075 6.218973784 3.780278 3.063531 3.033812183 2.73119 5.610260542  
3.687997 3.644152 1.824906 3.832263 2.4483 3.236597522 2.973337 2.483387  
3.369823 3.424953 3.842394 3.055033 5.641328 4.203892 3.791283136 4.331463034  
2.583103 2.718277 2.451669 1.938198 4.120673697 3.007874 3.533266195 4.377204  
2.994154 4.253577403 4.303039509 2.516256 2.12173 3.385278961 1.75985  
1.576113 2.405876 4.154799 4.211584 2.744864 3.487247 3.534957 3.546288 3.745812  
3.909774 2.946309 3.58375 5.624736569 4.704034 2.440431 3.234291375 1.945134  
4.051241 4.351224 3.516801 4.948702 2.986620738 2.318604 4.294027 2.884594  
0.4586813 2.448604 2.432214236 4.33816 4.765518 4.446191 4.034469061  
3.065754966 3.451065 3.611512 2.940467 4.453113744 4.756968 3.715009 3.428301212  
4.938045 3.755476 4.897074 1.843566 5.381533 3.105634 4.220495627 4.657659  
2.521207425 4.720592 4.65218 3.039788 3.970042 2.640311 2.610218 3.584354  
2.49002218 4.205682 3.253084 2.988153341 1.404818 3.371199 4.101678 3.601399  
1.491132 1.948608 4.166508 2.805116 3.308633225 2.097863 4.397690533 4.082258  
3.93618 3.782712 4.653571825 2.352253461 12.74644 3.225869 4.199541 0.6604782  
3.733054 4.003225744 4.170256 10.85614 3.181964 3.181303197 3.138049 4.870697  
3.943803711 2.547744 3.891677608 2.210445 3.840483 4.740797421 3.552058  
3.996325 6.78768439 3.404771511 3.06551 4.609328 3.785367 5.094298 3.683484  
3.701582 5.116208 6.661837 3.354474 3.184330412 2.423566 3.809510254 2.659068  
3.659845622 4.619435 3.886446 2.232086968 1.392101 3.615386 2.531369 1.59718975  
3.182591 3.422457 3.299255882 4.798027129 1.793077 3.161752 4.446067 2.997683067  
3.00469911 4.022282147 4.091166 4.192036 10.31778 3.343912 4.865622 3.817899  
3.530886 4.522241 3.269446 2.744837 3.347397 4.823467721 3.222314 3.37073  
3.963929 3.110412 9.460346 1.763702 2.817453 4.650673 2.613411 3.369253 3.954922951  
3.415095 3.486392 3.53549 5.031136 2.951882112 0.9703579 2.616079 4.0937  
2.169644 3.900779 3.474957 3.747589 2.358862521 2.376327 4.101709 2.372542122  
3.465024 5.217374 4.110409 2.805171 5.032668 3.409197097 1.402173176 2.746459  
3.470732 2.723016 3.190704824 3.88034545 1.991128362 3.281027 5.201155  
4.033693 2.813534 4.651088 3.251662 4.411099 4.38118344 2.916357632 4.66211  
4.156807451 8.986634 3.155802433 4.284952 5.481006 4.299081 3.782625 4.187242  
4.051347 3.879128 1.421483 3.409512 4.641740397 3.75813 10.41088 2.317452 3.00309  
3.834808482 3.576051 2.23313 5.171996 2.928933337 3.367792 2.185658 3.085619  
3.678757 3.577023 3.742543 2.016214 3.802019917 3.336186545 3.747359727  
2.433483 4.217219976 3.691952665 2.61443 11.85369 3.983353259 4.47261  
3.502228 3.344214 3.680922849 3.792055 3.503551 4.18343 3.521397814 3.788884  
2.034386 4.040796 3.044971 6.466584 3.031595 3.593634 4.534243 2.834104 3.071583  
3.083826 3.739214991 2.425159 1.313 3.912996 3.357713 2.486618 3.798242  
2.377478 3.082666231 3.423641155 4.391066842 3.357324 2.878046 4.513402

3.629478 4.669933 3.595654828 4.723468 3.937008 3.35121 2.636994 2.832029  
2.69811123 1.956621 1.751372 3.320371 5.647202 3.038153 3.615156 4.40301  
4.206237234 3.610858 3.297986 4.641359743 4.018647 4.66855 5.144748 5.202941  
1.377787 4.118650663 3.997917887 1.475321992 2.324868 4.993432 2.832493  
3.911789 3.990712 4.401663 3.633148615 2.996309 1.343650142 3.023455 3.481313  
2.772512 3.310753 2.426749 3.42830175 3.507269 5.049351 4.068805 3.838697  
2.231503 2.521316 2.878582 3.390716211 3.180965 2.514859563 2.710281 1.603688  
3.271452627 2.908124 1.667547 3.687814 4.865182602 3.514339 4.594918 4.262339  
2.717238548 3.686962 2.341022 1.065793 4.190981 2.491996 4.37749 3.655817  
CCDC18-AS1 0.746494 3.025394298 0.969168 1.944002685 2.152277622 1.86553367  
1.530922 1.455497999 0.7404789 0.8806455 1.21229525 5.22044 2.273985  
3.422115 5.252614 4.188397 2.044139 0.798439101 1.059231 2.834865 1.196870823  
1.534044 8.038758657 2.204927 1.92972 1.199494855 1.800073 0.3400749  
0.6065765 1.810991 1.632445 1.614884916 2.347236 4.755928894 1.600391  
5.724860891 3.761550103 3.604675355 2.839848 4.162623 2.733207096 5.343644  
0.667893441 3.607311 2.02912023 6.345584 3.297664 1.600596 1.320328683  
1.038121 3.254466 17.79544 1.757476517 1.73817 0.978513018 5.356112 0.6791837  
4.444047 0.5271403 1.863509 0.5192897 3.512553 6.033873735 0.8920453  
0.8572684 3.365082 0.8860867 3.448775 3.950884 0.6950098 1.79068  
5.707342891 0.7030018 0.6157908 2.265680044 1.219402 0.504826525  
4.518341 1.451858 0.6487736 1.125383 0.9141024 2.341557 1.008476039  
5.298726347 0.2650094 0.4740329 6.500358 1.999924572 1.312292 0.7182679  
0.7740601 4.912284458 1.799528 2.996619 0.911288903 2.602221 4.228145954  
0.92361997 0.7853056 0.57054056 0.7125795 4.006702 0.653514156  
4.824737 1.3452 0.928975538 4.11211 6.440330775 1.743875816 0.8641083  
5.078175696 1.150161 3.466499 1.591867 0.9053106 1.533482 3.70455543  
2.621282 4.181727 0.8627863 1.300422 1.150515 3.045301 2.344276 1.743963  
2.656151 3.096832 5.763973 5.684894598 2.90786212 1.041296 4.713475124  
2.787879224 1.348606 4.263232881 2.221241 0.6829832 0.580941338 8.228366893  
0.877964105 2.937890779 2.618407 1.949213 6.240306 1.807633 4.767834 2.053782  
3.032333532 1.513367 4.213963 6.908618178 5.166982 1.803471 1.036597778  
2.874144 0.9228011 1.083165307 2.995008 3.3227 1.621343131 3.15384  
6.594748 0.8203024 2.834641775 3.627802 2.90895 0.568417267 0.9199703  
1.949607839 4.611184 1.435864 1.302824384 1.006372 4.758581795 4.348778  
8.531813 1.060454 1.574424 0.9662198 3.815592247 1.211138 0.7782476  
7.563785 3.776326 1.557761 0.3932185 2.484434 2.841051 3.926404402 0.417525576  
9.984241 1.700216 2.740263 1.581009 3.673589949 4.179364 3.827681702 2.316678  
3.140948 0.714289066 1.570927783 0.4346109 0.8590187 2.432320121  
1.360584 1.30736 2.137575 2.389901 3.037725 4.224209 1.385864 0.9051961  
0.8233704 5.433502 12.6619 0.7194863 0.922913 3.292482174 6.234321  
2.694026 1.573387866 0.7973883 1.326772 2.914546 3.055159 0.5956957  
3.203450271 6.653562 1.801771 2.531768 0.0725509 5.301943 0.554772328  
0.6000796 5.433539 0.9068411 3.364662358 1.09339906 2.606018 1.134447  
2.567628 4.281308821 2.962033 1.993111 1.551225588 1.817904 4.67288 0.5230469

1.280216 1.129532 1.123979 5.533905772 1.681737 0.763391085 1.587628 8.257535  
3.998639 0.8221653 1.925972 1.589739 1.043557 2.301296507 6.573929 7.089218  
0.55872123 3.437518 0.7312905 1.546731 1.635208 2.297956 3.069673 2.009172  
3.909857 3.332232633 0.6928338 0.851244469 6.651538 3.593111 1.605304  
4.102796481 1.793018925 5.954358 1.918178 5.702735 1.1763 1.356351 1.104424119  
1.065082 10.67091 0.7994227 1.403065896 0.9536565 0.8912282 1.142825485  
0.9102242 1.431514612 0.8341545 4.754368 2.396045889 2.546158 2.212505  
9.33001988 3.898956133 0.9738454 0.8714278 3.257347 3.188465 3.120471  
5.451933 4.915855 3.768527 0.6360535 2.385030459 0.3936673 0.710675343  
1.086885 0.921155461 3.402043 0.8142094 1.423550315 3.771417 0.5757038  
0.805831 0.756247127 0.9222431 1.126476 0.599384843 4.426851095 0.3925815  
1.766616 1.328978 4.293099019 4.41174885 7.434744732 0.7145458 0.9625509  
0.496231 0.8618495 0.8095579 1.909434 0.7847131 0.6822627 3.210734  
0.8258857 1.188817 1.537843966 2.168173 1.095941 2.661402 0.9290994  
13.24313 2.895069 2.097823 0.9671282 3.033602 2.424196 5.813219871 3.908394  
1.057103 4.203786 0.9668111 7.675726075 1.249724 5.265521 3.588932 0.7987163  
3.880462 0.8266669 0.7652471 2.771755144 0.9159481 0.7371699  
1.108760779 0.8270854 4.005304 4.473267 2.294254 2.987263 1.783932937  
2.64931689 5.089467 2.063625 2.152392 0.738291216 2.821567894 2.488974748  
1.735151 1.678754 1.788153 1.160955 2.80882 1.135219 0.6664756 7.254675881  
5.711981367 0.4411345 2.886407998 15.41489 1.147820235 3.835212 2.075129  
1.394084 4.425014 5.006663 1.429433 5.078917 0.7380739 1.593566 4.61362312  
7.00794 1.625766 1.269861 1.424447 4.988731413 1.755238 1.506501 2.940614  
0.813727969 1.730014 0.9430861 0.7651975 0.8853554 3.814193 1.284669  
1.701374 6.26262924 6.867589267 4.626749183 0.6229709 0.944782295  
0.614017243 1.589579 2.089452 3.94085365 3.426547 1.390132 1.075788 5.652221366  
0.8159714 1.169568 0.6806297 0.487365622 1.196065 2.254885 0.8345171  
2.044514 1.073881 6.397852 1.263869 0.8973961 5.005773 2.041032 3.353237  
0.765578319 2.902953 1.791603 2.275698 2.389272 1.23104 0.9860622 0.3199964  
1.047866865 1.138579115 0.694053963 0.8894874 3.205149 0.8830451  
2.290075 3.857042 4.950102985 1.050418 6.853592 0.7072358 0.9650756  
1.606007 0.431281075 1.123372 5.128505 2.307941 2.711288 1.533193 5.854174  
2.308013 2.828988742 0.9100391 2.004998 0.946725256 0.7933595 4.723529  
2.693965 4.296443 3.080751 2.771981869 5.292101157 0.692167278 0.2560444  
4.942656 1.355858 1.078177 2.561008 1.025909 3.121931743 1.5588 0.681675073  
0.9973483 3.867343 1.022623 2.423283 0.8864474 2.674699501 0.9911613  
1.453471 1.906986 1.269662 1.93364 3.397898 2.312718 2.503977904 3.241142  
1.051891518 2.569407 0.3901 2.576231607 7.563827 2.788276 1.027687 2.894740057  
0.873232 3.460778 4.337585 1.027407288 1.688523 0.6202289 0.4139168  
0.8530947 2.436367 2.417237 1.579548  
AC096992.2 0.8167098 1.22010682 0.3976447 1.539533493 0.747913627  
0.790850521 1.194978 1.022093892 0.4360619 0.8305362 0.508336957  
0.724782 0.597469 0.9755971 1.383448 1.81944 0.5443164 0.68735045  
0.7853161 1.014949 1.34480202 0.7266366 2.261257264 1.031627 0.7114131

1.494164311 2.148992 0.4983553 0.7157781 0.7633136 0.6772225  
1.65708684 1.932703 1.202281018 1.551017 1.206822924 1.752838048 1.481054399  
2.020171 1.455592 1.543116479 1.980127 0.574321647 0.7453214 1.107540046  
1.011716 1.30807 0.7094712 0.428599296 0.7407347 1.412298 2.583224  
1.672424016 1.924285 1.012275203 2.486811 1.48336 1.54518 0.489641 0.8071708  
0.2922462 1.264792 1.426541224 1.852669 0.6330786 1.214626 0.5876025  
0.9903749 1.632225 0.673908 0.6644639 1.752317903 0.7196448 0.6023085  
1.052889603 1.00673 0.416297201 2.627262 0.8829461 0.8106548 0.8329134  
0.7763893 1.81745 0.815906196 1.097773956 0.3158447 0.846121 1.309481  
0.99467745 0.9999628 0.5367688 0.7868298 1.239850875 0.6610365  
1.097763 1.119453475 0.9534855 0.501852177 1.079153282 0.8759498  
0.774602228 0.5751994 0.8158703 0.312810976 1.697952 0.4912383  
1.240274456 1.507973 2.220848378 0.882605551 0.4465151 1.653512512 1.13151  
1.079396 1.065415 0.5002922 0.9204864 1.594429406 0.9654474 1.466733  
1.357693 0.643908 1.092697 0.8457275 1.057122 0.73057 1.580374 1.448949 2.71423  
1.914752531 1.478794615 0.8062784 1.216593515 0.968180363 0.908896  
2.249983438 1.161742 0.5591118 0.289471579 1.820660334 1.042117754  
1.218039051 0.9724849 0.9940663 0.9190995 1.423282 1.63097 0.7837581  
1.402012696 1.508045 1.555971 0.649877216 3.047026 0.8673993 0.414564654  
1.015808 1.05647 0.920234084 0.8698334 0.4914212 0.832453875 1.170723  
0.9662389 0.6837483 1.801790475 1.440707 1.58222 1.788877798 1.590891  
0.96153906 1.180647 0.5253708 0.627573322 1.368661 1.849043379 1.240218  
2.860284 0.5679604 1.250769 0.4128659 0.831760407 0.6630684 0.7210672  
1.891534 1.595716 0.6626734 0.3262902 1.492997 1.588734 2.034990545  
0.857660042 1.698542 1.339902 0.3966083 0.5876791 1.896935861 1.107499  
1.468517445 1.463133 0.5982627 0.86732362 1.445694224 0.5907396  
0.3319404 1.102513202 0.9811377 0.7856309 0.6085054 1.253231  
1.263775 1.413522 1.051999 0.7473493 0.6029587 1.271714 2.478316 1.064422  
0.3774737 1.610844071 0.7667721 1.174498 0.85992992 0.6036634  
1.022464 2.079481 1.067372 0.6052244 1.514025937 1.15471 0.8780706  
0.900946 0.2190798 1.339095 0.545776157 0.8589502 0.9534098 1.048386  
1.838589702 0.503116923 1.484083 0.578067 1.294202 1.753512026 1.368372  
1.320941 0.7222681 1.113297 1.084124 0.6563862 0.462156 1.691591 0.7523482  
2.202079443 2.014614 0.745796597 1.236279 1.93922 0.6802576 0.6396359  
1.088242 0.6810113 1.35934 0.545031922 1.885479 1.538852 0.592101893  
0.5447065 0.7100443 1.451565 0.9462352 0.793995 0.6320045 1.066488  
1.555677 1.901382532 0.6891721 1.416374477 1.521538 2.01141 0.9487111  
1.868011276 0.828691849 2.408683 1.887551 2.50284 0.08288662 0.9406469  
0.700397978 0.8658818 7.62845 0.9106751 0.935712138 0.6688962  
0.5547279 0.951987951 0.4166162 1.085785646 0.3923922 1.635224  
1.18231243 1.250388 0.7926732 0.27478047 1.093943093 0.9768389  
1.221354 0.7982298 1.256831 1.335413 1.920591 1.774632 1.054474 0.6190724  
1.351544853 0.5974278 0.824584882 0.7666066 1.417243239 0.8398703  
0.9801735 0.987623464 1.014714 0.5721593 0.9111573 0.784851873



0.7158342 0.6719183 0.807377286 1.806383135 0.4406679 0.9946114  
0.8693123 1.938403154 1.099580228 2.548263844 0.6404735 0.4910071  
1.517616 0.7583115 1.365067 0.9640965 0.9887534 0.926946 2.379732  
0.4802857 1.123407 0.754085552 0.8825838 1.108953 1.462429 1.004553 5.02676  
0.9815751 0.5746605 1.445703 0.7950779 1.169741 2.264046365 0.7775477  
0.918801 0.9652706 0.9349876 1.291735597 0.4784015 1.427899 1.293381  
0.4289737 2.03501 1.111345 1.252612 0.884101828 0.4937035 1.051458  
0.665509109 0.5168885 1.443613 1.402838 1.230932 1.256086 1.280532089  
0.611248639 1.371632 0.9459534 1.299601 0.524563801 1.474500929 0.735999467  
1.33176 1.47244 1.24559 0.6833885 1.459219 0.8945307 0.8293315  
3.154622985 1.380874493 0.8227558 1.477081381 5.53682 0.686769302  
0.5306639 1.892419 0.6659607 1.873033 1.177166 1.123673 2.017833 0.3227135  
0.925814 1.605791008 1.917041 2.411674 0.9115513 0.6078586 1.596581321  
1.044671 0.7654875 1.603869 0.728987399 1.043973 0.6487328 1.252531  
0.4516289 1.523568 1.696982 1.580277 1.830317053 1.126220985 3.136684323  
0.59017 1.273570756 0.588451564 1.186199 4.23572 2.080239838 1.182392  
0.8220889 0.6183577 2.448265431 1.014574 0.5144228 0.7658962  
0.581253169 1.236097 1.250671 0.5082285 0.7530174 1.467315 1.557708  
1.084988 0.3520543 1.549537 0.9060674 1.187567 0.631685704 0.6443104  
0.8373801 1.106305 2.028582 0.822746 0.6985532 0.5185423 0.503646293  
0.594899094 1.388077398 0.6990196 1.619998 0.9088108 1.788983 1.461584  
1.547755484 1.256417 1.751329 0.794491 0.370192 0.8028186 0.690347626  
0.7228688 1.27586 0.7830889 1.311798 0.8351685 2.31791 2.211915  
0.928644573 0.5626489 0.8286104 0.685255013 0.3202028 1.812995  
1.055276 1.573385 0.8001466 2.084151055 2.099176702 0.607508073 0.6764434  
1.511743 0.8120496 1.235191 1.65825 1.326056 1.337856377 0.8313158  
0.699598503 0.5265684 1.218684 0.9151872 0.9032227 0.1214131  
1.546909576 1.126769 1.438597 1.278239 0.8171773 0.734091 1.399164 1.571589  
1.532514897 1.58366 0.424944334 0.4258973 0.5610193 0.764587917 2.0028  
1.22927 1.030016 0.970162147 0.8451823 1.443461 1.632928 0.878022545  
1.337386 0.5243525 0.298121 0.4545997 1.425253 0.9046401 1.231397  
AC127502.2 0.7665541 1.863330473 1.389411 2.312225905 2.190727499 0.751451819  
1.71922 1.05673433 0.4888913 0.9245154 1.854300336 3.719591 0.8257851  
2.384604 2.591204 4.874888 3.733936 1.807505441 0.9643112 1.424018 1.565312943  
1.83859 7.56799315 2.67486 4.206341 1.007911328 1.568022 1.373784 0.8159959  
1.921452 0.9629366 1.160283115 3.382795 4.227625638 1.513113 2.541234502  
5.466839182 3.762850133 2.274898 3.75066 0.942956911 2.254158 0.508997316  
1.488012 2.22950529 1.820134 3.737537 6.696121 0.76437181 1.070156 3.186885  
9.354855 2.966715845 2.067522 1.362519651 3.940408 1.484799 1.656761 0.303613  
1.176625 1.454867 3.604424 6.571906702 0.8730591 0.6595905 2.12016  
0.5192852 2.527929 3.527602 0.5659408 2.358113 4.480718069 0.9495593  
0.7000532 1.477186299 1.52089 0.798722982 2.786508 0.6073989 0.3871098  
1.121624 1.037379 2.077657 1.341183239 5.181683678 2.070936 1.235674 1.647784  
2.788844201 0.9614719 3.629283 1.035182 2.830348195 1.84912 2.790161

2.60942443 0.6129245 7.528944848 0.515325146 1.022805 0.798970404  
1.004275 2.704939 0.532151212 4.174619 1.560465 2.049471127 3.174311 1.96661568  
1.665610063 1.208975 4.429504234 1.155699 6.698389 5.474751 2.45729 2.247125  
2.35965979 3.880888 1.207707 1.915536 0.7518607 0.385415 2.043823 5.650416  
0.5643439 2.545581 3.06023 3.045306 4.341257174 2.336425609 1.745716  
8.52282497 2.830607439 1.283642 3.797549013 1.318872 0.5893956 0.921537199  
7.776434181 0.462594623 1.744940674 1.02973 1.825036 4.267036 2.437052  
4.768514 2.917796 2.513459342 1.923905 2.620829 3.555636537 2.865207 1.699617  
0.524399132 1.623602 1.360804 1.9225364 3.070765 2.654274 1.060051855 1.69026  
4.223634 1.056235 5.594879204 1.741003 4.150538 0.941405113 1.159359 1.549668864  
11.41677 1.435261 1.258670238 1.51453 3.438483801 3.308364 5.353492 0.3477697  
1.09781 1.224193 6.166348292 1.438819 0.9343317 5.187501 3.281508 0.7170501  
1.59513 2.613245 4.645615 1.334463998 0.328205899 7.41918 1.246932 2.169391  
1.473322 2.880777559 4.809331 3.865424786 3.378514 1.804337 0.985906342  
1.987318625 1.323279 1.303877 1.768973289 2.405988 1.569052 2.49373 3.71816  
1.610468 1.806068 4.539309 0.3191328 0.5398673 4.676585 4.94903 0.5551068  
0.4783663 1.698338481 2.852462 2.172425 0.657024012 1.772125 1.030932 4.50164  
3.857107 2.513226 3.98366778 3.90031 3.044843 1.351725 0.147694 2.897739  
0.796348089 0.8025107 6.953355 2.534453 2.17067622 0.572365208 3.595265  
0.5015425 2.560016 2.106139109 2.093606 3.200308 1.612532249 1.20778  
1.124377 0.3180518 4.020609 1.487051 1.572529 2.868574827 1.3547 0.942147501  
1.694655 2.601143 3.812111 0.9350314 2.966746 1.201147 1.460525 1.453494547  
1.995133 4.624972 0.636175833 3.511515 0.4821088 1.570676 1.252605 3.460451  
0.5237108 1.241363 2.871756 3.544544174 0.6895397 1.512352108 2.565033  
2.83841 1.542357 3.873272389 3.596944661 2.211946 3.02429 3.381469 0.01979031  
0.9380031 0.845438408 1.045666 3.108071 0.4841876 2.959376775 0.3360092  
0.85467 1.489866298 0.576017 0.815219791 2.160702 2.780972 2.76050204  
1.327583 1.763408 1.96822762 2.90386095 0.7126583 1.427698 3.528207  
2.448699 2.563048 3.190034 2.418523 2.60301 1.52542 1.744056814 0.5212991  
0.41809538 1.437385 0.655623192 2.288982 0.5718048 2.190537598 3.147245  
1.171977 2.310747 1.504918735 0.5995178 0.4600557 0.864297986 2.179193051  
0.335794 1.527452 0.5969144 2.668929854 2.946489673 6.742250196 0.7832579  
1.256085 1.976463 0.1874663 0.8437338 1.64796 1.038745 1.79541 2.151299  
0.6603046 0.8530885 1.267686421 0.8218428 1.982378 2.548165 1.295194  
4.59577 0.8892063 1.414958 1.144212 3.078898 1.422081 4.36840589 11.0495  
1.086435 3.335772 0.8519607 4.825701687 1.381083 9.937989 2.807049 0.6785545  
3.627354 0.6354406 1.819119 1.209624742 0.4179327 0.3091285 1.10272342  
0.8110075 4.661688 3.933006 0.6261384 1.398364 0.885237015 11.509670927  
3.04365 2.909068 2.017655 0.610577984 1.072420451 7.302554312 1.126741  
1.773806 1.770134 0.6424753 3.355261 0.8423267 0.7920569 4.542391848  
2.0867764 1.244146 2.56198234 5.172215 0.799380772 3.398181 3.760182  
1.394835 4.48277 3.585746 1.181121 3.255628 0.2889459 0.7975749 1.87207171  
6.647061 3.188537 1.332522 2.507925 5.170711564 1.439017 0.7992341 2.107784  
1.25440135 2.056417 1.363473 1.281681 0.308093 1.248117 0.9669014 1.83819

4.193645652 5.496511169 4.405255784 0.8387568 1.246737832 0.167147553  
2.90151 2.944772 3.750637644 3.1409 0.4116267 1.316469 3.532156783  
0.9343671 0.8219858 0.6681721 2.258900566 0.7703027 4.451444  
0.8190889 0.1449079 3.430544 3.253467 0.959684 0.7509161 4.149161  
1.492049 3.973192 0.948033946 0.4671419 4.779114 1.483278 2.240764 1.579164  
1.283295 1.777136 0.62740396 1.549530294 1.345624868 0.5281371 2.767816  
0.7883342 2.977805 2.663037 4.55040132 0.8922678 4.352369 0.5253108  
0.4941714 1.557163 0.378436033 1.017076 3.26075 1.734219 2.526558 1.027384  
2.162524 2.003232 1.505406676 0.8970452 2.26453 1.176577045 0.5447262  
0.05947934 3.302305 2.7501 1.693062 3.045431378 3.087222361 0.818501184  
0.3964339 3.066283 0.8889579 0.5217794 1.666094 0.849548 2.598894418  
0.8592771 0.240921187 0.1605005 1.34234 0.6201057 2.900583 0.2500304  
3.601121272 1.866406 1.089337 2.776073 1.492937 2.095988 3.8811 1.149168  
1.395514054 1.906264 1.110733781 0.5847106 0.545372 1.887071359 3.259701  
1.949711 1.778784 1.028479167 1.331872 3.246086 2.693087 1.594238041 2.072444  
0.5673791 0.4328541 2.374354 1.237937 5.023492 0.8317956  
AC010776.3 44.18177 0.045716 0 0 0 0 0 0 0 0 0 0 0 0  
0 0 0 0 0 0 0 0 0.5079313 0 0 0 0 0 0  
14.09094 0 0.03095208 0.096466611 0 0 0.036259081 0 0 0.03879982  
0 0 0 1.983958 0 0 0.05709074 0 0 0 0 0 0.1140698  
0 0 0 0 0 0 0 0 0 0 0 0 0 0 0 0  
0 0.034559997 0 0 0 0 30.4291 0.06616161 0 0 0 0 0 0 0  
0 0 0 0 0 0 0 0 0 0 0 0 0 0 0 0  
0 0 0 0 0 0 0 0 0 0 0 0 0 0 0 0  
0.03528209 29.52808 0 0 0 0 0.03638971 0 0.078475921 0 0  
0 0.1256957 0 0.053563802 0 0 41.31106 0 0 0 0 0 0  
0 0.109834728 0 0 0 0 0 0 0.1582521 0 0 0  
0.03271857 0 0 0 0.072498802 0 0 0.04262885 0 0.041542196  
0.03484558 0 0 0.03209092 0.03638334 0 0 0 0 0 0  
15.11965 0 0 0.03794539 29.770712331 0.1322764 0.04190303 0 0  
0 0 0 0 0 0 0 0 0 0 0.03670928 0.2773377 0 0  
0 0.03342578 0 0 0 0 0 0 0 0 0 0 11.07053 0 0  
0 0.120265079 0 0 0 3.326925 0 0 0 0 0 0 0  
0.03233672 0 0 0 0 0 0 0 0 0 0 0 0 0  
0.2492451 0 0 0 0 0 0.066606223 0.04254861 0 0  
0.1046811 0 0 0 0 0 0.04412258 0 0 0 0 0 0 0  
0 96.1562 0 0 0 0 0 0 0.114349727 0 0 0  
0.03848079 0 0 0 0.2465472 0.03027172 2.18269015 0.051115432  
0 0 0 0 0 0.02639813 0 0 0 0.110393333 29.37269 0  
0 0 0 0 0.07973488 0 0 0.03924495 0 0 53.69762 0 0  
0 0 0 0 0 0 0 0 0 0 0 0 0 0 0  
0 0.1146624 0.02377477 0 0 0 0 0 0 0.044227447 0  
0 0 0 0 0.07743733 0 0.03945377 0 0 0 0 0 0 0  
0 0 0.03809586 0 6.722113 0 0 0 0 0 0.04870233 0

0 0 0.267532518 0 0 0 0 0 0 0 0 0 8.37122 0.03967438  
0 0 0.307889792 0.2021391 0 0 0 0 0.024551 0 0 0 0  
0.03390225 0 0 0 0 0 0 0 0 0 0 0 0 0 0 0  
0 0 0 0 0 0 0 0 0 0 0 0 0.0310723 0 0 0  
0 104.2951 0 0 0 0 0.03168451 0 0.071598776 0 0 0 0  
0 0 0 0 0.08482624 0 0 0 0.027978085 0 0.08107732 0 0  
32.23295 0 0 0 0 0 0 0 0 0.03652805 0 0 0  
3.215814 0 0 0.08840361 0 0 0 0 0 23.13531 0 0 0  
0 0 0 0 0.2179237 0 0 0 0 0.1591571 0.59413938  
0.8396434 0 0 0 0 0.08888362 0 0 0 0.31017 4.000157 0 0  
0 0

AC005288.1 5.68003 12.37393897 10.90101 10.794289524 6.56418446 11.298427604  
11.37968 11.800722037 8.315952 10.26331 15.059953039 13.25722 11.05664 14.61323  
12.73955 6.873357 7.850377 7.743695865 10.81923 13.35868 11.830532436 11.40133  
5.496650375 8.063586 5.597512 9.657921856 14.39836 12.89304 10.97586 9.523212  
12.44947 12.104224812 7.111203 7.918787066 10.82552 9.210503665 10.028755886  
7.45056185 12.7802 8.263821 11.232979653 10.88778 9.282731127 12.28106  
9.534880647 8.454146 6.473824 4.12687 11.749601159 9.022365 12.42067 3.736454  
7.209042844 7.845351 9.47523738 9.148802 10.33376 7.141354 10.27474 8.62372  
13.44808 9.552755 5.116271766 10.69242 10.06751 10.16019 10.16121 6.75674  
12.63755 15.26647 13.80954 11.070743147 11.81103 12.39487 9.303229733 10.65707  
22.15510191 10.70426 11.93134 1.6185 10.79696 13.79945 13.96568 14.215061229  
8.791290666 7.921148 7.93023 10.62042 9.478890564 12.22469 12.32616 9.637377  
10.362565313 10.09633 10.4185 3.715332386 12.11194 3.876192101 9.59476472  
8.740633 9.302912717 8.33008 7.1435 3.790014151 11.19658 7.737128  
14.980562055 9.897979 12.711675258 10.834891001 9.635214 11.622421418 11.01673  
4.111927 5.77493 8.117033 11.1641 13.339947002 5.191768 11.98484 11.72985  
14.80217 9.904001 9.827975 5.340231 4.964878 8.215596 8.057772 7.948745 6.5691137  
13.342324455 11.76928 5.209557277 12.284219145 9.301687 13.192023985 11.84641  
12.58009 4.618580135 5.017557972 16.094967681 9.12160535 15.0685 9.354637  
9.981809 5.20237 6.768968 10.58141 9.973171539 13.12234 10.0083 14.431261577  
10.7765 11.58061 11.105778886 7.545405 16.29567 8.838119732 8.911674 3.068865  
10.159066066 11.39056 4.948388 9.178549 10.824607841 8.213832 6.750398  
13.493207229 8.343282 14.403631511 7.082733 8.158222 8.253951362 7.387263  
11.163778569 9.57451 6.534308 6.636999 10.03819 5.433529 5.639383916 13.34659  
6.805917 10.49776 10.58344 6.681295 7.87471 11.36427 11.57751 11.636351001  
7.384838214 5.738949 9.895742 4.447882 6.616856 10.711480769 4.879436 9.226924882  
10.1972 6.84392 10.719237123 12.69728911 8.349637 4.361194 10.7727847  
2.870506 5.085686 13.43899 12.69415 7.985053 10.77226 10.48108 9.287051 7.365177  
10.49439 10.93125 11.2259 11.42834 12.705632578 11.83398 11.23715 8.082541315  
4.321291 9.679073 12.19312 7.139094 9.560986 4.664420497 9.293263 9.673548  
7.914961 0.6056313 9.27408 5.71955549 2.608232 4.04497 14.3702  
11.687130697 11.184612677 7.827122 10.95267 9.513104 13.378560741 12.04687  
6.177378 9.147042305 10.81529 9.375995 7.78738 13.19605 12.08262 10.86789

14.077342608 10.40567 7.381525764 11.67395 8.029882 11.59658 7.847273 5.947522  
9.549689 6.194683 13.332397329 9.502786 7.73514 7.518650878 7.517889 8.226331  
9.817254 8.865586 4.686157 7.255458 13.48714 4.961009 6.778082919 6.683214  
11.869025805 9.540046 9.089128 15.6966 11.820555855 6.68453163 12.03322  
8.486412 11.97336 0.3787083 9.769388 10.768633987 10.42533 17.58705 11.36119  
6.79343751 10.81854 8.607898 10.652144247 9.694653 11.142917021 6.531048  
11.87173 10.52940166 12.12062 8.99957 13.18243332 9.626818935 10.20153 8.71931  
8.120211 11.05012 8.414694 10.42846 11.21884 8.276291 5.600503 8.626421572  
10.29465 12.554374848 5.187703 10.715201173 10.97057 10.13083 5.801713654  
5.034895 10.61401 9.13786 5.910959546 15.31091 10.71917 8.165384284  
11.852556042 3.726947 8.055223 11.48128 8.603504729 8.209782039 9.788713078  
10.30839 9.56882 14.70843 11.30085 12.48114 12.95742 10.0463 12.77971 10.09098  
8.358015 13.04987 10.426637497 8.876778 6.929867 11.1349 10.32236 15.92702  
8.536212 10.38526 14.81847 8.90337 7.565008 10.68389866 8.238066 8.624451  
11.19159 10.42456 9.332608413 1.050326 3.126266 12.60244 10.28988 8.116572  
8.265624 12.00789 10.562233095 8.246588 11.81563 11.49292648 8.699582 8.990139  
13.21971 9.833471 9.245691 9.184303031 5.005260527 12.79064 10.96567 9.918801  
11.83812407 9.461389755 3.442841949 8.012286 11.15853 10.36104 5.248135  
13.37434 10.72619 10.66592 12.375466534 3.495343457 8.285506 10.111208284  
14.38921 9.682488873 11.36791 10.02548 9.474953 10.7119 12.30947 10.02507  
9.975799 7.003758 10.48527 12.881045086 7.673765 15.53536 8.032251 8.879429  
11.810576243 8.339805 12.29632 12.23796 7.498261886 6.907567 7.153848 10.08004  
10.97018 10.66465 12.49874 3.676257 4.893560557 4.840441859 10.889426316  
7.117245 11.430050721 12.376972053 11.0948 21.79242 7.728618003 11.61134  
10.01805 9.299852 14.178615203 8.461115 8.859177 14.45895 6.344719153 13.3851  
5.505479 12.77151 11.97217 15.49234 9.207643 9.6088 7.613725 4.235675 18.01643  
13.0137 9.875796222 9.446986 14.8367 11.84985 8.738944 9.43169 10.3314  
8.029298 8.404221952 8.78966555 12.445804367 10.50021 10.73862 12.50603  
4.704135 12.30932 12.801404489 14.5091 9.221599 12.24634 8.962246 9.99741  
12.248935889 15.95783 2.358407 8.623602 8.75255 7.519176 7.058548 7.592113  
12.202526083 10.44881 11.80706 13.339318446 7.693835 14.39009 9.804304 9.390136  
6.645387 14.385731488 10.88840151 2.577435412 4.615928 10.37537 9.70565  
11.51973 12.16022 11.45086 9.975853639 8.592482 2.608100718 11.75886 6.933935  
7.38621 8.681055 10.13383 12.636879705 8.135994 13.80317 14.63738 11.65051  
3.114481 6.473348 11.12349 10.82231537 9.651716 10.320963384 14.29905 1.935548  
10.626651058 6.035155 6.31859 9.97406 9.696134415 11.97607 10.82396 11.13204  
5.99752555 11.50213 7.165442 3.691903 8.994422 9.537215 8.330896 10.89639  
AC025917.1 0.5352175 0.560219185 0.1348681 0.552478496 0.482874989  
0.796754678 0.3266629 0.764289208 0.1581865 0.06242877 0.235628802  
0.4268634 0.4797763 1.706304 0.8059179 0.7279973 0.2765666  
0.157121115 0.4550208 0.4074068 0.398763488 1.023574 0.786118339  
1.007754 0.4676602 0.82707127 0.7359391 0.1890017 0.07009516  
0.1516362 1.166629 0.271858242 0.7585942 0.287089733 0.6351379  
0.96041075 0.495111614 0.477902904 0.7158113 0.529805 0.278837527

1.315306 0.148899693 0.4961651 0.531079313 0.7525162 0.6196537  
0.1160683 0.26759377 0.3491714 1.384963 0.5882691 0.452643271  
0.4393242 0.30937495 0.7684724 0.2644538 0.4270721 0.08130006  
0.2363033 0.1422378 0.7160841 0.18793219 0.5762767 0.1467251  
0.278774 0.1591777 0.6011595 1.382721 0.2585178 0.3359979 1.839056042  
0.1975121 0.1264244 0.290406714 0.5854317 0.103374497 0.6537724  
0.4011665 0.08841455 0.4632952 0.3737203 0.8679689 1.032765974  
0.450136366 0.101356 0.1142334 0.159948 0.67183263 0.6013122 0.1244039  
0.1228133 0.798982268 1.11275 0.4924306 0.131923446 0.6969495  
0.504016326 0.365024374 0.2336051 0.057448066 0.3666045 0.4051922  
0.190308412 1.021037 0.4158057 0.495213377 0.9628929 1.544140656  
0.861497694 0.211112 0.824045166 0.2039673 0.1091631 0.1717741  
0.1490785 0.509394 0.549716945 0.1402652 0.5337319 0.1487507  
0.0858612 0.3453385 1.132092 0.370593 2.370482 0.6693341 0.944119  
0.8684393 0.4621091 1.505396664 0.2802999 0.278864549 0.480835122  
0.2265478 1.168803151 0.4419772 0.1173575 0.10436098 0.487603096  
0.173490347 0.711132538 1.337625 0.590512 0.7928874 0.3958392 0.6846807  
0.9034558 0.583784411 0.8065643 1.022846 0.461469114 1.418606 0.7476407  
0.257579711 1.249131 0.257739 0.167575166 0.4319923 0.3139778 0.233858373  
1.602554 0.8613068 0.2291111 1.285567662 0.6814381 0.6119798  
0.190376705 0.06732999 1.604523644 0.2238806 0.1868909 0.319988115  
0.2440054 1.417486387 0.3171734 1.393239 0.07643206 0.2939665  
0.06675879 0.390364184 0.2711923 0.1802618 1.889195 0.4831653  
0.6078009 0.05671683 1.233197 1.216497 0.956562239 0.179714428 0.7410099  
0.1907263 0.2172647 0.03405077 1.073544828 0.3080147 0.971484575  
0.7763653 0.459754 0.305891969 1.108655829 0.1941667 0.1786807  
0.245302359 0.2889226 0.08996956 0.2080769 0.9143931 0.5721728  
1.049218 0.573455 0.2398278 0.2495435 0.7736874 1.11396 0.06491977  
0.242266 0.956412045 1.513405 0.2687612 0.334825893 0.1238527 1.2407  
0.6425994 0.2835128 0.511794 0.266681937 1.281633 0.3765803 0.2878153  
0.0358411 0.509635 0.042163825 0.06924315 0.3615814 0.2794252  
0.770869639 0.452700145 1.265504 0.5208055 0.7060361 0.773154323  
0.6089086 0.5186492 0.260876914 0.4058219 0.675265 0.08053779  
0.3739158 0.2806725 0.4802253 0.780556066 0.7575471 0.188562641  
0.3927 1.769142 0.4637043 0.3358199 0.3387973 0.2443884 0.3436872  
0.163242998 0.8342478 0.7500705 0.087326991 0.6475073 0.1748482  
0.4437895 0.6995507 0.1244077 0.7754619 0.09269021 1.458685  
0.728804929 0.1064837 0.318070585 0.5343005 1.099691 0.6818672  
0.902334935 0.223593699 24.99228 1.070643 1.131842 0 0.6540253 0.180363672  
0.487604 8.921116 0.2088861 0.320292547 0.1811996 0.1746559 0.077871847  
0.1077843 0.782226281 0.1136782 1.170205 0.553305395 0.5302641  
0.6571287 0 0.697972571 0.07546549 0.3302442 0.582077 0.7864796  
1.095158 0.6322061 0.8410781 0.2423697 0.2754795 0.229549893  
0.06041999 0.180372922 0.5643702 0.123174939 0.8260842 0.1967239

|             |             |             |             |             |             |
|-------------|-------------|-------------|-------------|-------------|-------------|
| 0.180707323 | 0.1917928   | 0.09770979  | 0.1027332   | 0.117535843 | 0.3216002   |
| 0.2610713   | 0.197402688 | 1.145793374 | 0.1955702   | 0.1991654   | 0.5252261   |
| 0.434277716 | 1.089043583 | 0.729062072 | 0.1086139   | 0.1950822   | 0.9166279   |
| 0.2426278   | 0.3061683   | 0.2945388   | 0.2138806   | 0.2630609   | 0.8444225   |
| 0.3016226   | 0.2701539   | 0.342406868 | 0.3347206   | 0.1877332   | 1.437732    |
| 0.4390314   | 6.217364    | 0.5218983   | 0.5660398   | 0.4591596   | 0.4030922   |
| 0.3581562   | 0.638179427 | 1.177787    | 0.1216831   | 0.8242144   | 0.2918773   |
| 0.4026122   | 0.02015935  | 0.5941217   | 1.044672    | 0.2485521   | 1.330163    |
| 0.1914138   | 0.414411197 | 0.2392478   | 0.2618763   | 0.100349766 | 0.06845505  |
| 0.9543705   | 0.8077394   | 0.2728823   | 0.7996919   | 0.590112506 | 0.296210023 |
| 0.4535012   | 1.104961    | 1.260842    | 0.218835369 | 1.08830026  | 0.39801641  |
| 0.2925079   | 0.7344106   | 0.07424302  | 1.534666    | 0.2655564   | 0.3417058   |
| 1.048035098 | 0.421512836 | 0.1452842   | 0.712961844 | 8.941269    | 0.119376497 |
| 0.5165538   | 0.6308562   | 0.4923441   | 1.384993    | 1.004109    | 0.8598726   |
| 0.03739674  | 0.4001454   | 0.66219732  | 1.462657    | 1.206684    | 0.323365    |
| 1.005724421 | 0.5415412   | 0.6495111   | 1.437726    | 0.466078108 | 0.4917164   |
| 0.3204896   | 0.1531211   | 0.3738267   | 0.7792746   | 0.3307296   | 0           |
| 0.384890817 | 0.685702568 | 0.2996142   | 0.354202007 | 0.098759461 | 0.8773999   |
| 2.25211     | 1.29788918  | 1.107162    | 0.4550544   | 0.1552561   | 0.851131087 |
| 0.1834229   | 0.2321251   | 0.137580032 | 0.206268    | 0.4853487   | 0.2237996   |
| 0.2188045   | 0.5060262   | 0.6680581   | 0.3314722   | 0.2393414   | 0.4338452   |
| 0.8832744   | 1.282154    | 0.292804494 | 0.9506014   | 0.6573504   | 0.6179949   |
| 0.3860205   | 0.277694    | 0.1485668   | 0.06656103  | 0.071051383 | 0.188013301 |
| 0.319288051 | 0.05326285  | 0.3323726   | 0.3478293   | 0.3316981   | 1.844999    |
| 0.995834543 | 0.2986591   | 0.8612911   | 0.05665684  | 0.1403956   | 0.163068    |
| 0.244894884 | 0.5624398   | 0.3264517   | 0.7992314   | 0.2837595   | 1.830426    |
| 1.422361    | 0.3712243   | 1.036486647 | 0.27763     | 0.7445335   | 0.322306518 |
| 1.000753    | 1.071969    | 0.8165473   | 0.5499418   | 0.869457567 | 0.822933917 |
| 0.02850464  | 1.092733    | 0.0958776   | 0.1761682   | 0.5107115   | 0.1718008   |
| 0.625095992 | 0.2341299   | 0           | 0.171375    | 0.4156777   | 1.031876    |
| 0.03165663  | 1.025138956 | 0.1713764   | 0.4143878   | 1.308242    | 0.3958092   |
| 0.01417801  | 0.3815015   | 0.7853891   | 0.578115982 | 0.5863887   | 0.196973922 |
| 0.03701544  | 0           | 0.566283134 | 2.398251    | 0.1984132   | 0.2746927   |
| 0.1068454   | 1.042529    | 1.682021    | 0.198761926 | 0.3160361   | 0.2327098   |
| 0.2634      | 0.639838    | 0.8095912   | 0.4876984   |             | 0.1008396   |
| MIR600HG    | 1.859823    | 0.466449878 | 0.2811247   | 1.111079357 | 0.31571354  |
| 0.6524547   | 1.449027697 | 0.1440571   | 0.1294975   | 0.092720651 | 0.3839361   |
| 0.3646937   | 0.9283743   | 1.454711    | 0.7342198   | 0.4035703   | 0.96981065  |
| 0.6603732   | 0.7479224   | 0.267141389 | 0.5311376   | 0.844818098 | 0.655014    |
| 0.4914094   | 0.649095743 | 0.7830329   | 0.1019969   | 1.373144    | 0.4388251   |
| 1.331229    | 0.4951509   | 0.7807537   | 0.440870468 | 0.9720441   | 0.947255109 |
| 0.40335804  | 0.649369739 | 0.3498527   | 0.9292246   | 0.505409226 | 0.743818    |
| 0.167102717 | 1.814081    | 0.155840361 | 0.9335975   | 0.4935143   | 0.1879128   |
| 0.465229965 | 0.6571646   | 0.9189479   | 0.6003148   | 0.985519503 | 0.4000831   |

0.641743634 0.7563833 0.693062 0.6157986 0.1172272 1.841124 0.8100944  
0.9839039 0.680357379 0.6208451 0.3239257 0.3185863 0.2061649  
0.2543767 0.7893188 0.5427892 0.7054679 1.324943992 0.5489367  
0.5212922 0.528934287 0.4927897 0.062760619 0.8197776 1.284203  
2.402097 0.4312888 0.1092446 0.8937661 0.309090338 0.704999526  
0.1743496 0.1479537 0.4656177 1.255637804 1.016613 0.2448937  
0.3863682 0.445363372 1.080915 0.8072027 0.291005396 1.217792 0.800302146  
0.528041394 0.4389855 0.162763121 0.259668 0.1771199 0.121041747 1.47999  
0.5469609 0.252272428 0.6906829 1.122912138 0.458548256 0.6257718  
0.731611947 0.2771488 0.4943011 0.612688 0.1508473 0.5550871  
0.548822797 0.5068907 0.3915468 0.4098655 0.4244705 0.2352869  
0.8808305 0.339991 2.930735 0.2460769 1.076484 1.277558 0.904011223  
1.798041979 0.4795853 0.334845613 0.469858839 1.109984 0.964331713  
0.228237 0.5284371 0.096547859 0.853941623 0.206528006 0.402959259  
2.671295 0.5839384 0.5699887 0.5340477 0.7620849 0.9141753  
0.773497042 0.3465431 0.4803377 0.385229157 0.645947 1.139811 0.498931557  
0.6118945 0.6363449 0.258969619 0.5682532 0.2055726 0.120682879  
1.693638 0.4462214 0.4752504 0.862789364 0.7226204 0.6723187  
0.210614835 0.2180124 1.173699505 0.5165043 0.3025734 0.606360561  
0.2197414 0.620420227 0.3048898 1.314269 0.3686489 0.4585755  
0.154016 0.19896087 0.3128274 0.2576408 1.011683 0.9705531 1.972007  
0.1285531 1.083558 1.165847 0.637208618 0.856332808 0.768547 0.4691123  
0.7745221 0.1929468 0.633147461 0.40517 0.7523045 0.568866 0.6690149  
0.256460563 1.459848748 0.8070402 0.2290142 0.642250789 0.3183374  
0.1196487 0.8000736 0.7859118 0.8105462 0.8063294 0.4121023  
0.3073862 0.2666445 0.6870059 0.7397097 0.5386583 1.193017  
1.148578136 0.7680011 0.5146131 0.190372543 0.2005155 1.568818  
0.7802685 0.3240019 0.4902469 0.397667953 0.8079163 0.907588  
1.110101 0.09791916 0.4284125 0.184877755 0.1646521 0.7154822  
0.1376824 0.413408473 0.13325714 0.7013307 0.7767298 0.4230447  
1.059151453 0.6007299 0.531363 0.799835802 1.26537 0.5275534 0.4291984  
0.4965874 0.329984 0.3158501 1.020687027 0.4657064 0.759383728  
0.5262804 1.091459 0.8896149 0.7475696 0.5805037 0.3338389  
0.1704049 0.313841757 0.9888569 0.5134209 0.141380998 0.5637106  
0.2789135 1.028481 0.825826 0.3398863 0.4080246 0.150064 2.151446  
0.528221561 0.2185727 0.831844206 0.5319897 0.9409898 1.088933  
0.43991981 0.243650219 4.336467 0.4333385 1.709318 0.1244038 0.581333  
0.16060324 0.5256108 2.586636 1.059465 0.320041649 0.5916077 0.6892401  
0.191361214 0.5725818 0.728923071 0.1932453 0.8719202 0.457494056  
1.013217 0.7442876 0.88927116 1.08654461 0.8756048 0.4177031  
0.712259 0.9478995 0.8600222 0.7545934 0.3946662 2.037989 0.2717794  
0.461643573 0.2965139 0.109507825 3.264596 0.623182031 1.550712 0.6824848  
0.443719422 0.2467441 0.2966074 0.2806707 0.18009461 0.263432  
0.4560389 0.197248054 0.405785863 1.081802 0.4456018 1.165833 0.3666971



0.72351241 0.905842171 0.342896 0.5921905 0.03019779 0.1114222  
0.3159969 0.361751 0.3740945 0.4258914 0.9606694 0.675803 1.179011  
0.913813348 0.6299672 0.2605175 1.318882 0.1750038 3.035383 1.048057  
0.7041527 0.3515948 0.8763484 0.1661026 0.56826124 0.7033346  
0.4145269 0.7172346 0.3293494 0.576612382 0.2855796 0.9523814  
1.159504 0.2766512 0.9527181 0.1536323 0.2614746 0.246005862  
0.5662719 0.3069391 0.480624624 0.4987243 0.6326961 0.5582472  
0.3489154 0.4855081 0.121517973 0.156378024 0.2375389 1.206807  
2.662174 0.937394811 1.015031034 0.525478328 0.3014536 0.3390299  
0.877728 0.08113382 1.369981 0.4921585 0.4322002 0.693850375 0.199039901  
0.2829903 0.81417526 3.360447 0.164278339 0.6242325 0.6529319  
0.9275745 0.9287063 0.5174033 1.137646 0.3710721 0.7227527  
0.887244 0.78536594 0.9118781 0.06342864 0.2408205 0.3523873  
0.633635686 0.7828094 0.2847942 1.122795 0.403224936 0.2748375  
0.1705537 0.4531932 0.8775683 0.6924198 0.3002839 0.15204  
0.475460806 0.4780927 0.616745254 0.2425353 0.415152 0.154179627  
0.5859548 0.2298308 0.676677516 1.070136 0.6311584 0.1909347  
0.422490058 0.6781062 1.247227 0.5913432 0.17749583 0.5287457  
1.432397 0.3027346 0.752762 0.8192483 1.491263 0.6430526 0.2509878  
0.9248115 0.6782019 0.6268877 0.696960162 2.332836 0.3572805  
1.202757 0.5228039 0.1685933 0.2937208 0.2761382 0.119139301  
0.238439239 0.232027593 0.5847587 0.6950535 0.3120679 0.637704 1.13411  
0.523327952 1.027489 0.9796978 0.4815642 0.2888582 0.1929263  
0.291413453 1.845379 1.016827 0.367965 2.217709 2.7284 1.406739 0.940861  
0.4091979 1.072619 1.119289 0.50195765 0.8185043 0.5881023 0.7182107  
0.4470147 0.4063502 0.953088129 1.228622341 0.488466193 0.3634198  
0.6697371 0.9787755 0.3052676 1.227723 0.4960212 0.406615333  
0.2576373 0.181734453 0.1544911 0.789452 2.565052 0.3050188 0.3395417  
0.938673468 1.273323 0.2862837 0.3395742 0.8087627 0.3500481  
0.5597406 0.7693692 0.513860667 0.8860637 0.654579325 0.2571884  
0.1052536 0.523887605 0.9205829 0.1791462 0.2183908 0.666169361  
0.8454443 0.7966848 0.9048848 0.5602635 0.1648127 0.5651302  
0.1519204 0.1385931 0.6442714 0.7587024 0.7259712  
AL133342.1 0.3887335 0.476645504 0.6693659 0.228501181 0.43015251  
0.185651873 0.234966 0.532386673 0.6106317 0.5164019 0.519756792  
0.1176984 0.3097477 0.555317 0.1720371 0.9477073 0.5297876  
0.173291138 0.2580938 0.5295732 0.227483788 0.5210373 0.986610363  
0.2353692 0.2380566 0.467218656 0.4796278 0.3474211 0.8813221  
0.4013802 0.09301384 0.385503901 0.5019987 0.447014679 0.3502514  
0.334500264 0.588070779 0.790628985 0.5809371 0.8989686 0.481357442  
0.3253838 0.537459102 0.03648184 0.35144101 0.3247673 0.5952411  
0.3840403 0.643926588 0.05776592 0.07512273 0.08282686 0.774662241  
0.7928787 0.460639013 0.4623051 0.1750019 0.529902 0.2353759  
0.3909335 0 0.5819427 0.207273117 0.5047284 0.2648049 0.162775

0.1755593 0.7956329 0.3884492 0.4276846 0.3474159 0.760620515  
0.3049746 0.2614413 0.720660923 0.2245847 0.273631728 0.25449  
0.5228982 0.292541 0.4598774 0.4121815 0.5912707 0.096257954  
0.323779484 0.0558935 1.209501 0.2035487 0.740973876 0.8289949  
0.5238807 0.2216496 0.463794232 0.4802353 0.6109974 0.13095024  
1.687337 1.026252661 0.581519806 0.4416796 0.80784381 0.441091 0.4290166  
1.439272361 0.4222937 0.1474065 0.169503505 0.2831969 0.449157349  
1.05428513 0.3698023 1.275323558 0.2892324 0.6772364 0.7104455  
0.2740346 0.561818 0.363774437 0.8619026 0.6307078 0.4543179  
0.6493546 0.6094061 0.2545691 0.4087324 0.4613715 0 0.380957  
0.4420681 0.655285855 0.716218042 0.3372511 1.291767642 0.545471974  
0.1183561 0.416475171 0.252136 0.04853822 0.838594654 0.806676706  
0.371434412 0.812838975 0.1459074 0.3108402 0.1957807 0.6860491  
0.6135547 0.3795941 0.692457754 0.2874 0.5206667 0.381720695  
0.4940845 0.857567 0.730512952 1.236053 0.554315 1.159332115 1.072014  
0.4277708 0.270822053 0.2104143 0.2279874 0.1895174 0.651063248  
0.4058466 0.3856922 0.503926098 0.3182538 0.055301632 0.3950739  
0.4497265 0.818131561 0.4036756 0.599896307 0.9838549 0.706351  
0.2950431 0.7294947 0.5301305 0.191350345 0.4486528 0.3354975  
0.4327519 0.6513099 0.0648728 0.3753228 0.671447 0.6014484  
0.879171882 0.594628888 2.60505 0.485434 0.2211917 0.05633262 0.304464353  
0.3184817 0.393599137 0.6200536 0 0.404847186 0.880381776 0.6918668  
0.09853474 0.60873188 0.5310948 0.7229521 0.3671855 0.2491582  
0.2704532 0.4833864 0.7744552 0.3967642 0.132108 0.3657047  
0.633498 0.3866451 0.1335993 0.16655378 0.2655476 1.231285 0.791323489  
0.3642638 0.1498233 0.6910138 0.2759033 0.489203 0.603735079  
0.3411973 0.6418826 0.5041625 0.4150615 0.2594233 0.697546333  
0.7446004 0.3323278 0.4823719 0.46761177 0.544679459 0.2254662  
0.4495335 0.6412802 0.147586678 0.7555208 0.5005224 0.604222296  
0.7957099 0.4156797 0.5329577 0 0.663338 0.4539835 0.595998358  
0.425637 0.49912428 0.3464916 0.5683141 0.3068557 0.3003086  
0.7473289 0.3032319 1.080314 0.771613079 0.4929128 1.094908 0.536607661  
0.1616932 0.3403104 0.5210401 0.330662 0.668904 2.451769 0.6133762  
0.5317235 0.560797286 0.5033246 0.526206938 0.3535726 0.4350493  
0.294277 0.271417687 0.96744924 0.5683371 0.5142314 0.5617463  
0.762738 0.4243141 0.17903312 0.2634051 19.96469 0.1727877 1.126001138  
0.3197562 0.1926305 0.147233109 0.8024191 0.601903689 0.2256791  
0.5279873 0.627684153 0.244815 0.3857576 0 0.35529415 0.1664639  
0.5463466 0.4926832 0.3469679 0.5514168 0.4268995 0.2446516  
0.4009695 0.8545229 0.854461844 0.2998714 0.767324152 0.207484  
0.226419021 0.2827552 0.464935 0.717496943 0.9065614 0.2309262  
0.5665296 1.000018074 0.5573817 0.909282 0.571510445 0.437438769  
0.2588367 0.6955975 0.3034321 0.792779821 0.400373946 0.560995152  
0.5750006 0.3227384 0.3526612 0.3087665 0.7091225 0.5376845

1.314256 0.5222406 0.3775645 0.2494979 0.2720474 0.141617048  
0.4430018 0.2218433 0.5320425 0.6162725 15.80647 3.453655 0.2478812  
0.9854536 0.03810653 0.1975078 0.187695273 0.3194258 0.402618  
0.3506289 0.2341205 0.614834015 0.8004254 0.4655833 1.318478  
0.4523172 0.6903792 0.1794176 0.4433373 0.274236043 0.4130137  
0.2888271 0.405816404 0.1698751 0.435554 0.3025588 0.3693672  
0.5222319 0.47956895 0.213061498 0.3971962 0.4062258 0.1946841  
0.543052525 0.574057487 0.752533759 0.5328307 0.3519395 0.687729  
0.4421719 0.3949413 0.2312258 0.7537445 0.346767897 2.556909148  
0.480708 0.617835332 21.36648 0.631977871 0.146498 0.4174682 0.3490801  
0.4103809 0.4467012 0.1835547 0.2298079 0.556813 0.3453856  
0.35668107 0.9366884 0.3629643 0.8987426 0.3915539 0.376718922  
0.1706496 0.05969626 0.5488923 0.616853102 0.5423211 0.3534726  
0.6332979 0.6431863 0.6043171 0.7098158 0.9321798 0.647804522  
0.483053569 0.567203422 0.1724081 0.976636226 0.746902154 0.1741855  
0.4458254 0.873433619 0.2460435 0.7344675 0.6322492 0.265676809  
0.4584788 0.1820698 0.4517897 0.625923364 0.170622 0.4014736  
0.5846017 0.2585599 0.2700501 0.334914 0.4916494 0.107989 0.6698918  
0.08595671 0.6448325 0.507474455 0.07230566 0.3728578 0.3480487  
0.343873 0.2205164 0.4159434 0.6607 0.335843969 0.705032756 0.624261276  
0.3965245 0.3054821 0.6905267 0.9407176 0.5876112 0.372011697  
0.4446838 0.294806 0.6248764 0.6967995 0.290527 0.226882397 0.07919016  
0.4696282 0.1322226 0.7153427 0 0.7211156 0.2339592 0.618428676  
0.3757935 0.8798108 0.880963492 0.153467 0.3820654 0.275485 0.2078266  
0.2538999 0.671256083 0.77062556 0.465866846 0.188629 0.2754722  
0.5287239 0.2185858 0.4608582 0.2273779 0.640182553 0.4841723  
1.547556589 0.9794258 1.057977 0.05690353 0.138527 0.1396582 0.278026354  
0.4050289 0.2836764 0.8939573 0.5914463 1.219696 0.3155726  
0.07532321 0.412572753 0.3449262 0.171509505 0.08164972 1.597949  
0.229430872 0.7679224 0.6059984 0.3246027 0.321394044 0.8131049  
0.308907 0.2318906 0.61067701 0.04021854 0.3079908 0.1853625  
0.3050331 0.6712628 0.2060561 0.5020303  
AC232271.1 0.6463142 0.785338571 0.3368772 0.954907699 0.936082478  
0.855926934 0.7158544 0.574154025 0.1058364 0.02088432 0.391205526  
0.9202587 0.6419991 1.79665 1.130598 1.570349 0.4934395 0.455535489  
0.2551468 0.2790699 0.613326455 0.877991 3.119492494 1.861454 1.79713  
0.539864335 0.7211743 0.3559435 0.3001467 2.46871 0.5705191  
0.415747853 1.082764 1.634567211 0.5547904 1.546684867 1.970570877  
1.547977087 1.259051 2.169246 0.913869957 2.089018 0.175094871 1.426218  
0.68103831 1.364501 1.711839 0.7377393 0.341796944 0.1401701 0.8709257  
2.406189 0.731007242 0.5522408 0.36568347 1.480142 0.5485005 1.714423  
0.1903814 0.4216034 0.2356484 1.490545 2.337796455 0.4384847  
0.1070924 1.170301 0.1845992 0.7751726 1.797883 0.2306189 0.7680771  
1.816950114 0.1761968 0.2326105 0.825773898 0.3557372 0.36887371

1.172154 0.2656936 1.971824 0.3306375 0.1111296 0.933713 0.311429049  
2.592668689 0.2335792 0.336288 1.284179 0.840235959 0.391139 0.2421346  
0.5079573 1.669351748 1.217091 0.7083519 0.523704495 0.272957 1.054885677  
0.217087547 0.267936 0.038436248 0.1635205 0.8024506 0.157644058  
1.611062 0.4570416 0.434153728 0.7539922 1.899737065 0.442165501  
0.1273991 1.766647486 0.6303455 1.892869 1.982496 0.1773201 0.4544208  
0.899052108 0.8401444 1.326368 0.1633202 0.333736 0.3696839 0.828525  
1.079957 0.9151687 0.8011095 1.068195 2.27946 2.767888833 1.606256555  
0.4830516 1.202387244 0.949804331 0.2606014 0.930379892 0.8837298  
0.143952 0.053199115 2.107987135 0.482510278 1.176501099 0.8851178  
0.6584807 0.844561 1.034139 1.934171 0.7611805 0.864696301 0.4815254  
1.310201 1.037746022 2.739166 0.511333 0.421266954 1.541311 0.3046494  
0.489242051 0.6840355 1.260422 0.604999794 0.9247069 0.9604443  
0.327017 1.497901095 0.8206623 1.007381 0.107559917 0.1244179 0.678407421  
1.657673 0.3031306 0.674712593 0.6475759 2.558432708 2.166293 3.392867  
0.2159147 0.5463373 0.3275484 1.599308297 0.3870808 0.2311617  
2.229802 1.923638 0.9007643 0.1315496 1.622316 1.347163 1.125922885  
0.26962881 1.817862 0.484254 1.297088 0.5543628 1.10818296 0.9101891  
1.043508872 0.9612543 0.8983972 0.475591595 0.784615263 0.3197768  
0.385211 0.533397106 0.6085583 0.2866433 0.9528566 1.271552 0.7246204  
2.334045 0.9709358 0.1872026 0.05342712 1.457854 2.197102 0.4806836  
0.1380773 1.341540088 1.866588 0.4518493 0.412479191 0.6997487  
0.8442418 1.13217 1.123247 0.4261243 2.792217008 1.971243 0.4173801  
0.6720929 0.05595304 0.4109207 0.188067741 0.4092296 1.4784  
0.2655266 1.604582426 0.110139603 1.042091 0.2676504 0.7656895  
0.968255583 1.527738 1.378392 0.477082861 1.166528 0.9596231 0.08382061  
0.5264044 0.6557639 0.3977999 1.720712018 0.5865377 0.235498417  
0.435954 3.723368 1.381631 0.3805457 1.259311 0.4587383 1.065424 0.910162388  
1.907055 2.223852 0.144676541 0.561281 0.07798937 0.5619172 0.546049  
0.9086633 0.2690236 0.6408256 1.996008 1.519543762 0.1628436  
0.251004959 1.496647 1.007671 0.4429871 1.426967241 1.204453867 4.003165  
1.486567 1.350467 0.01713702 0.3603622 0.386157624 0.186421 2.271749  
0.2387524 1.214339349 0.1508684 0.04544378 0.679793974 0.08413332  
0.30833431 0.380288 2.010727 0.726287206 1.760144 0.6665799 6.39130266  
0.957920139 0.07854155 0.3419517 0.8754963 1.036814 1.125639 2.290445  
1.327471 2.264835 0.345586 1.100676939 0.1077991 0.465481723 1.083846  
0.506678233 0.8576387 0.1754937 0.806027873 0.8065893 0.1307476  
0.1374695 0.486810517 0.3073858 0.1593504 0.088049597 1.081110181  
0.8665069 0.3109254 0.6284443 1.396015184 1.530872314 2.692280821  
0.368191 0.2465413 0.09508214 0.2164436 0.3072677 0.294464 0.3747835  
0.4576097 0.9059879 0.1825844 0.3195859 0.486818383 0.5424529  
0.6639119 1.037872 0.2492328 4.15196 0.4297621 0.3415861 0.326579  
0.8424702 0.5258509 2.138066926 1.860223 0.3889749 1.108151 0.2090916  
1.788906557 0.5754808 4.700305 2.147286 0.1607532 1.960238 0.3144269

0.3628578 0.653116116 0.2505465 0.3455553 0.228773647 0.4503725  
0.6458713 1.101247 0.2434332 0.7040033 0.374041071 0.557208788  
0.8329172 1.564627 2.230801 0.187084762 1.139695848 0.794664563 0.6105474  
0.527812 0.5748047 0.9537233 1.369047 0.4239224 0.2540244 2.17705648  
1.880118027 0.2106085 0.916171287 2.848692 0.681558456 2.271124 1.246144  
0.5646997 3.107256 1.449002 0.7959445 1.555177 0.06672185 0.3259219  
1.394406218 2.693799 0.30057 0.5480888 0.6334088 1.591238525 0.4524257  
0.4265149 0.9742585 0.945898224 1.023519 0.4023816 0.1792828  
0.1333935 1.064488 0.5183093 0.8796481 1.622851734 2.462675512  
2.463800745 0.2730906 0.394971115 0.119566243 0.7748847 0.2489866  
1.555210487 1.054015 0.2722805 0.6072736 1.93400974 0.2640801  
0.1636281 0.1461702 0.161086455 0.2453437 0.6193882 0.2679478  
0.4182671 0.3494836 1.715648 0.514926 0.4124662 2.393105 1.506379  
0.9150283 0.236328636 0.9064972 2.873408 0.4985173 0.50992 0.3121342  
0.2140928 0.1781335 0.185623374 0.491987759 0.595555339 0.1900591  
0.5024083 0.1758321 0.9194085 0.9021581 1.296726485 0.3463565  
3.31844 0.2569243 0.3652958 0.5762845 0.131079648 0.7526128  
3.336384 0.7352597 0.6690035 2.08334 3.514951 2.672952 1.114103454  
0.3771315 0.7669746 0.44378632 0.227572 1.287624 1.23017 1.456853  
0.8956167 1.156976349 1.135814084 0.663906217 0.1462136 1.12799  
0.4086462 0.3437795 0.7731327 0.439346 0.624021549 0.541738 0.383862434  
0.2015242 0.8771276 1.633917 1.489281 0.3106431 0.936994895 0.6770471  
0.4397768 0.4439893 0.6093717 0.39841 1.259222 1.177872 1.036508743  
0.9067175 0.420795254 0.2586627 0.09113673 1.283545307 3.271264  
0.5854636 0.4638411 1.126477245 0.2287553 1.436674 2.28826 0.449611922  
0.4825336 0.4636311 0.1799142 0.2995921 0.7935336 1.694441  
0.4834072  
AP000442.2 1.393644 1.224226346 0.4727837 0.605227471 0.532677582 0.679485856  
0.362095 0.57686898 0.336077 0.4725078 0.458890536 0.9446848 0.5593798  
1.136573 1.159892 1.331155 0.440687 1.001440368 0.4143084 0.6259859  
0.350564489 0.6482115 2.030104241 1.303512 0.9171442 0.385718861  
0.7462387 0.2676971 0.7818377 0.8215091 0.7614896 0.701346571  
0.94974 1.426182687 0.5903579 1.337032766 1.63852879 1.178512754  
1.398835 1.861575 0.985199343 1.077299 0.237259906 1.686613 0.634674718  
1.094808 1.465129 0.2774186 0.271338802 0.3338262 0.7959056 2.23371  
0.820734258 0.8273064 0.517612786 0.8905456 0.7163566 1.467341  
0.3400562 1.568878 0.3561559 1.261131 1.098002062 0.5401479 0.4463356  
0.7577604 0.3889101 1.14948 1.600479 0.5664007 0.8030793 1.684974603  
0.3986453 0.5036184 1.099007908 0.662451 1.070674145 1.021309 0.5230041  
1.7258 0.6644019 0.3969958 0.8745693 0.90393818 2.214140439  
0.5921769 0.7644921 0.8626181 0.713674838 0.5988397 0.2342692  
0.4803381 2.166529319 0.7400679 0.6669519 0.46246111 0.1896034  
0.432443967 0.538553262 0.3722313 0.343271093 0.5841554 0.9813754  
0.043320204 1.098186 0.757204 0.299307504 0.9887671 1.433018793 0.639353029

0.652993 1.016555547 0.4410794 0.9131998 1.676464 0.4486957 0.72843  
1.343093514 1.436795 0.9415803 0.4375799 0.3713497 0.5869543  
0.7530844 0.8463987 2.094904 0.7998983 1.064073 1.170899 1.788240609  
1.034746592 0.4872391 0.947943773 1.050751277 0.3989846 0.68765374  
1.019957 0.3038748 0.142535129 1.733211854 0.585409069 1.153735985  
1.077411 0.9409342 0.9616952 1.111301 1.681935 1.668091 1.053072873  
0.7908902 1.441767 1.317438662 1.189703 0.5082907 0.508155062 1.209116  
0.5133585 1.16516857 0.619511 0.5885869 0.260844399 1.175441 1.509667  
0.8031549 1.14964063 0.9555196 1.09123 0.26290355 0.4138137  
1.091916166 1.18912 0.3519406 0.718461353 0.6026451 1.943491816  
0.9791945 2.61389 0.3450673 0.5269639 0.5318743 1.082765998  
0.2592741 0.4847056 1.528298 1.3972 1.624552 0.2349719 0.9451907  
0.9580562 1.291341542 0.546688712 0.9593519 0.2571523 1.065213  
0.8681154 1.12411444 1.104293 1.279456142 0.959801 0.6279272 0.264596554  
0.635959994 0.2379918 0.73551 0.684022402 0.2557641 0.8601563  
0.7515225 0.565664 0.8954315 1.015805 1.006996 0.28661 0.2226716  
1.585041 2.274227 0.4758448 0.4932628 1.122923117 2.064383 1.416518  
0.330273435 0.7016871 1.500756 0.7935468 0.9035107 0.5255466  
0.984063735 1.291034 0.9273514 0.7823364 0.7709845 0.8745295  
0.380713446 0.2482504 0.8002103 0.3871669 1.412567899 0.786918481  
1.597674 0.6674981 1.080895 0.923970281 1.334091 1.222423 0.706667504  
0.5747957 1.551415 0.3208265 3.276929 0.532416 0.6285581 1.004570916  
0.6377087 0.510781459 0.7508837 2.134767 1.182202 0.4049424 0.7557855  
0.6327971 0.6571662 1.133357473 1.61416 1.68731 0.655986571 1.187488  
0.3605499 0.6615214 0.5706094 0.4955847 0.8237582 0.7630884  
1.575796 0.864218134 0.7756497 0.389861821 0.9194748 0.4380676  
0.5668703 1.241735916 0.575527466 2.394868 0.4677701 1.149732 0  
0.5721541 0.316134799 0.3012696 2.119341 0.1664218 0.893131553  
0.2502303 0.1855336 0.49633056 0.3649599 0.550741876 0.3441606  
1.589172 1.108358069 1.670218 0.7768679 2.73985053 0.998096066 1.002069  
0.37587 0.8412153 1.086101 1.479497 0.9868119 1.296009 0.6179152  
0.4389549 0.800121069 0.4091666 0.615878596 1.099119 0.457962261  
0.5446758 0.3358544 0.998201887 0.5675552 0.2224183 0.3546774  
0.347813304 0.2928254 0.3941019 0.216250099 1.088416727 0.5193762  
0.6699702 0.6376429 1.36011288 0.999114984 2.269373019 0.5538164  
0.5180801 0.2717347 0.3866082 0.8049606 0.7929962 0.7789758  
0.3353334 0.7273084 0.4634471 0.2807406 0.340998945 0.782248  
0.4914412 0.8590921 0.3179827 2.854524 0.7036647 0.4244422  
0.5734433 0.8625113 0.5469147 1.604424132 3.015043 0.3877847  
0.9756096 0.4932704 1.209038731 0.867303 2.416541 0.9781679 0.6138745  
1.080534 0.3672159 0.4575041 1.122563593 0.5138217 0.3651193  
0.497464894 0.2999637 1.206084 1.262785 0.6917535 0.7712541 0.44540417  
1.251792369 1.253955 1.089938 1.834935 0.464929179 1.005287273 0.573806992  
0.8767168 0.7415041 0.4636742 0.8044426 1.086831 0.579038 0.3629875

1.550678246 0.671647427 0.3472483 0.676219292 2.487608 1.027171928  
0.8466045 1.120102 0.4669711 2.668016 1.76131 1.090218 1.460852 0.6554763  
0.9425392 0.981543397 2.067493 0.5243879 0.5770874 0.404066 1.269939313  
0.6985407 0.6324661 0.8223754 0.631259869 1.081992 0.4539333  
0.4574744 0.3812246 1.43573 0.4842625 1.047476 1.585842518 1.50151077  
1.699620078 0.6849818 0.517360191 0.449615442 0.9786472 1.042829  
1.244355593 1.211224 0.5482413 0.3235078 1.663276651 0.6623812  
0.5553128 0.3481158 0.27402865 1.040794 0.5155766 0.4692198  
0.8467157 0.572222 1.54836 0.6374523 0.3987067 1.26738 1.6351  
1.144086 0.57764676 0.8531116 0.9875825 0.5447421 0.82801 0.4778822  
0.9833379 0.4065623 0.469032616 0.539251834 0.393132961 0.3819157  
0.941528 0.2955939 1.623357 0.896107 1.126104579 0.7614235 0.9938064  
0.3310201 0.3728489 0.679571 0.202914745 1.925884 1.583141 0.6526749  
0.7535806 1.146541 2.631972 1.295703 0.731018203 0.5228145 0.4519449  
0.379595211 0.4877827 0.674647 1.061342 1.351146 1.059698 0.738886395  
1.459727047 0.801255948 2.225574 1.193954 0.4243705 0.4736984 0.4931991  
0.8942533 0.948610585 1.375686 0.208675788 0.1241239 0.9680493  
2.192283 0.7171509 0.4203528 1.499586356 0.7021921 0.4098378  
0.6570958 0.7527599 0.7681124 1.18539 1.106359 1.119868529 1.204292  
0.495572201 1.297586 0.4439645 1.638921319 2.144928 0.7539098 0.4377011  
1.135028439 0.2894244 0.669434 1.630435 0.520311646 0.6197889 0.7663298  
0.4998933 0.3777364 1.044398 0.9923228 0.5698799  
AC007637.1 4.012926 0.596417964 0.5025393 1.700199449 0.469588784 1.00056159  
0.2268067 0.588843062 0.947294 0.3530827 0.435510499 1.072996 2.117857  
2.196248 3.390455 0.6193944 0.8716885 0.818943451 1.366762 0.5034384  
1.408999583 0.3667301 0.46896025 1.483085 0.263301 0.536898048 1.70647  
0.558928 2.761102 0.7466333 4.040276 1.050886458 0.5912867 0.764100366  
1.179789 1.34535271 0.236520775 0.847971307 0.8447405 1.066611 0.887337482  
1.275969 0.486370956 6.265335 0.600732407 2.525334 1.250224 0.6178407  
1.165436363 0.4878998 1.178354 0.3664406 0.997015842 0.2391706  
0.761657328 0.8832059 0.5982758 0.6748972 0.9737246 1.362682  
0.8382649 0.5349854 0.917012711 0.6315575 0.9052834 2.531419  
1.496923 1.047279 1.544975 0.3440276 1.592921 0.807628534 1.033849 1.177692  
0.611901839 0.9710204 0.440216318 3.71891 1.892777 2.029624 0.6473659  
0.7736329 1.919448 0.561363694 0.755295702 0.9441701 0.3344403  
1.129763 0.666158026 1.050273 0.6471613 1.262916 1.287105444 1.68684  
1.671044 0.351119324 2.82768 0.670729418 1.16942994 0.8660075 0.68805107  
0.4656903 0.280393 0.072359023 1.307811 0.8892986 0.318145039 1.309864  
1.829082249 0.266982583 1.222921 0.955115377 0.7173599 0.671878 0.6000532  
0.68334 0.9212296 1.58501719 0.5866475 0.4566047 0.2436342  
0.7345378 0.6127545 1.535807 0.4438564 11.42535 1.618158 1.317692  
1.111243 0.644244408 0.916558753 0.8138499 0.519546106 0.859268215  
1.110726 2.177570178 0.5881696 0.7808785 0.198400545 0.524101197  
1.14079716 0.56781198 3.755752 0.8572748 2.157546 0.476602 0.740311

1.316795 0.571668131 1.023812 2.425678 0.690872511 0.9439186 1.379646  
0.603944225 0.6214224 1.577759 0.223003875 1.207252 0.7127723 1.167043228  
1.337125 0.8711124 0.8994372 1.798079291 0.6529225 0.3102491  
0.236457631 1.113609 0.400359505 0.595867 1.8314 0.967796222 1.10403  
1.118647799 0.92331 0.7924694 0.5424716 0.4890019 0.1243768  
0.307842753 0.9383253 0.4647808 0.6962075 1.285963 4.435589 0.5887207  
1.724194 0.7629192 1.237603495 1.521917293 0.4314245 1.034775 0.2001663  
0.3851666 1.292579432 0.435515 0.804715598 0.570021 0.6409611 0.220981737  
0.865547505 0.1987623 0.693533 0.999725048 0.2349657 0.6841641  
0.5353444 1.331373 2.515438 1.413941 0.7164136 0.4521368 1.408039  
0.4202447 1.737215 0.6047526 1.343334 1.791917345 1.952963 0.3576591  
0.339486473 0.4761448 2.73574 0.9192878 0.5548385 1.195673 0.522998908  
1.842787 1.214888 1.194108 1.26395 0.6521217 0.187034401 0.27644 0.9623628  
0.6790313 0.871972157 0.766741084 1.81364 0.9040069 0.2394985  
1.523548629 1.215475 0.5176518 0.607542198 1.700174 0.8359274 0.3929831  
0.4198463 1.156103 0.3423584 1.717916146 0.7228033 0.401493377  
1.068412 0.7771539 1.530367 0.6763873 0.4809185 1.72098 0.2515526  
0.481028681 1.070542 0.4697274 0.531255192 0.2438725 1.122351 0.9334997  
0.9531059 0.331116 2.728963 1.315726 0.7238272 0.608988877 0.4656029  
1.188435924 1.052325 2.163338 0.9271341 1.055248105 0.457771715 11.77207  
0.528547 1.43091 0.05112859 0.563172 0.624058304 1.085895 7.123168 0.8165641  
0.772551783 0.6912532 1.142765 0.725406203 0.5737443 1.936674728  
0.2269191 1.309524 1.388492527 0.7548912 0.677022 4.32220622 1.214637473  
0.5021357 0.7690878 0.8646812 2.046729 1.045528 0.7554714 0.762587  
0.8224723 0.2520373 0.534586385 0.824152 0.925848263 3.29626 1.639174185  
2.255517 1.234172 0.32063966 0.5286947 0.4272388 0.3189998 0.134068357  
0.5502544 0.621709 0.246278834 1.495463748 2.845497 0.5448109 0.8986561  
0.757278966 1.068650459 0.947650272 1.532124 0.4975847 0.3971508  
0.596089 0.8352505 1.297533 0.3862778 0.1925403 0.6074224 0.9174631  
0.6565012 2.050490357 0.430588 0.2141397 1.27133 0.5842495 9.208778  
4.380858 1.196367 0.7596656 1.287415 1.012824 2.396827383 0.6423618  
0.5667622 1.425891 0.7415317 0.453355631 0.08048233 0.8738641  
1.977834 0.3142272 1.00655 1.208703 1.171747 0.974291349 1.010522 1.23426  
1.365099897 0.5921362 3.197015 0.5475981 0.7592999 1.260243 2.273247166  
0.291355745 1.473263 1.633831 4.664534 0.849389846 1.427286986 0.302667424  
0.3393136 0.9554577 1.106412 0.1185604 0.6580702 1.115982 0.4736787  
1.733403984 0.40512067 0.2416746 1.084328782 11.61546 1.048492957 2.94606  
0.5277008 2.667585 0.8252715 0.6961911 2.362409 0.517598 0.4727811  
1.157611 0.819750529 0.5964955 0.375386 0.4819631 1.012385 1.111113831  
1.109597 1.60865 1.165139 0.263603022 0.4985608 0.7266258 0.3311243  
0.3183854 1.604163 0.9992022 0.174963 0.390818333 0.459214561 0.937859431  
0.6067437 0.844522029 0.957532666 1.237674 0.4098514 0.775772223  
1.638307 0.3544814 0.1589308 0.662498697 0.4023255 2.953532 0.5814682  
0.228859092 0.2744951 0.6458872 0.7994267 0.6863487 1.020967



1.104554 0.8974368 0.6225387 0.2309392 2.074296 0.6688505 0.964860523  
4.871097 0.524869 1.417342 0.4346727 0.9312576 0.8364576 0.2952579  
0.810454236 0.967448955 1.042933208 1.27585 0.7863311 0.9257611  
0.2522364 1.221069 2.287083526 2.086593 1.047371 1.005296 0.5916415  
0.6510176 0.599653381 3.200936 0.2644368 1.023708 0.9890005 5.106938  
1.022741 1.78786 1.288877028 1.007622 0.6133538 0.61540064 1.234482  
1.511048 1.191094 1.044842 1.378593 2.54550423 1.425741969 0.455042938  
1.915621 1.038697 1.375147 1.421288 0.7826148 0.5944308 0.713021582  
0.4673593 0.224072589 0.2695262 0.893584 4.256884 0.9750173 0.1965958  
0.872208391 0.5212855 0.9697992 0.6623247 2.140906 0.4528239  
0.1269226 1.847985 0.980530048 0.7283249 1.03471119 0.4433311  
0.1730323 0.768971603 1.297198 0.3452859 0.522218 1.579893065 0.284373  
0.8075711 2.835283 0.170039735 1.730812 0.4954929 0.9691808 1.577361  
1.516044 1.624356 0.9230422  
ERVK13-10.8410275 1.072301759 0.5938439 1.727941428 0.516742274 0.956403246  
0.8594001 0.963473807 0.2848745 0.1602079 0.284660465 0.8375939  
0.7207178 1.224101 2.391232 1.436227 0.4679166 0.564143251 0.381038  
0.5011363 0.599881294 0.9393897 1.559713882 1.282665 0.9571913  
0.945439976 0.8539382 0.2722951 0.3805918 1.906769 0.6132004  
0.61023069 0.8065077 1.110818514 0.8757261 1.949876132 1.080250473  
1.357052007 1.286048 1.726579 1.344348765 1.929276 0.182829607 1.393911  
0.749585339 1.07605 1.4012 0.7524894 0.459998862 0.4079436 1.396825  
1.949184 1.635931824 0.9143397 0.589182267 1.165327 0.5107769 1.47632  
0.2443241 1.343153 0.3540397 1.199648 1.455304175 0.5975002 0.2017786  
0.8793044 0.3755239 1.093933 3.009276 0.2727884 0.7289457 2.471516153  
0.2614359 0.2561343 1.212675839 0.6405962 0.738608818 1.125421  
0.6042324 1.230004 0.4536712 0.3813805 1.56368 0.591364808 1.250324709  
0.5430259 0.2514932 0.9655102 1.15829002 0.4602281 0.3788248  
0.4252528 3.449499345 1.45851 1.044215 0.678878993 1.143384 0.528893262  
0.518587268 0.2456553 0.257995703 0.1282908 0.5998146 0.422282607  
1.725564 0.9366874 0.530478289 0.9262728 2.294166593 0.505284446  
0.3270725 3.098457378 0.6375629 1.284589 1.972069 0.5481304 0.6368569  
1.843824369 0.6089473 1.351667 0.2735484 0.1921774 0.5892619  
0.8298543 0.9577084 1.759595 1.294286 1.3265 2.914366 1.821927576  
2.433286639 0.4181692 0.680482167 1.117043377 0.5684947 1.28235228  
0.5022698 0.1842677 0.173174511 1.529943713 0.301867194 1.138625393  
1.107829 0.7413867 1.428959 1.318787 1.651099 2.010523 0.956605791 0.737435  
1.277016 1.324484812 1.041223 1.118866 0.516883133 1.051709 0.62313 0.481479986  
0.8226981 0.6311259 0.596980489 1.305573 0.9888313 0.5059519  
1.702698133 0.8485994 1.216247 0.212563964 0.1805805 0.812686036  
0.9273177 0.2363622 0.921360138 0.7283449 3.036548516 1.603795  
3.347764 0.2116288 0.5757199 0.3191958 0.783061698 0.6959473  
0.3210787 2.887298 2.139049 1.051321 0.1011187 1.471655 1.295572 1.586274745  
0.300105931 1.889106 0.60042 1.704269 0.3955221 1.07989877 0.8788475

1.412562595 1.612681 0.7481216 0.395448786 1.269807844 0.5103843  
0.3961941 0.791025555 0.8194948 0.255188 1.255315 1.025803 0.7728097  
2.080856 0.8646413 0.2267477 0.1496493 1.514165 1.565702 0.2262258  
0.4344735 1.28328703 3.02278 0.996866 0.338099713 0.7602066 1.640289  
1.1435 0.7928881 0.6205967 1.565905163 1.816606 1.017262 0.9466964  
0.08471588 1.16224 0.203117775 0.2267953 2.596516 0.4331986 1.518389363  
0.261252957 1.639578 0.60862 0.946134 2.875750946 1.449528 0.5939806  
0.826273652 0.9602366 1.696841 0.1377867 0.5965695 0.3447937  
0.4540341 2.351820422 0.7336058 0.226668446 1.01366 2.547259 1.262633  
0.4854509 1.461267 0.7564451 0.6939849 1.896175026 1.436649 1.311056  
0.124688841 1.221085 0.1930956 0.8817097 1.008969 0.7372417 0.8146319  
0.7073392 3.517948 1.185817933 0.2383354 0.576661551 1.864762 1.159185  
0.7407797 1.610221904 0.840950025 4.251403 0.7930075 2.270167 0.06227127  
0.4659315 0.528632926 0.3790231 7.238389 0.3138738 0.781394053  
0.4650035 0.2182079 0.438743499 0.1892537 0.577400584 0.3792446  
1.621856 0.901062093 1.152591 1.119466 1.13540786 1.670310475 0.3023866  
0.385512 1.48827 1.399829 1.000057 1.665965 1.193434 0.6383492 0.3720787  
1.401008652 0.1713742 0.401976527 0.8787292 0.404826906 1.527433  
0.2467277 0.673643684 0.6938744 0.2262386 0.3214547 0.401412564  
0.3474975 0.2913739 0.193302057 1.24996445 0.4279206 0.5350197  
0.885062 1.266162039 1.335719192 1.811414927 0.2845984 0.3886468  
0.2562477 0.2419991 0.405258 0.4389751 0.528237 0.3162217 0.9987309  
0.258983 0.5441555 0.534736244 0.9041862 0.5379167 1.268612 0.495948  
7.282606 1.306788 0.7150568 0.5296566 1.490209 0.9614462 2.116596008  
2.073239 0.4437509 1.456743 0.3751125 1.280001308 0.3430777 2.339791  
1.610279 0.5169916 3.075348 0.2966214 0.4498501 0.921685136 0.4495889  
0.2873855 0.551188756 0.6009859 1.635732 1.093038 0.3534928 0.9308845  
0.8487779 0.528799342 0.9422076 1.099183 1.632577 0.243846695 1.450748609  
0.791016553 0.5637035 0.5567011 0.7860637 0.4452296 1.932319  
0.6248512 0.2923009 1.496424863 1.470742562 0.3335897 0.772666898  
7.782696 0.657846249 1.100353 1.64328 0.7457372 2.054925 2.799032 1.253806  
2.13323 0.1641582 0.6438518 1.179362816 2.04565 0.5249282 0.5083834  
0.7055607 1.458346761 0.4702095 0.9796152 0.923636 0.734955428  
0.8064566 0.5515109 0.421384 0.5230889 1.220281 0.6495298 0.5581019  
1.170144785 2.568805078 1.577027107 0.4345871 0.466445645 0.339192376  
1.4126 0.6681627 1.353378866 1.439598 0.5291754 0.266155 1.370828328  
0.4576792 0.339406 0.2692598 0.466881737 0.6222012 0.759334 0.3086405  
0.6185021 0.6768541 2.397978 0.7348547 0.3379624 2.300935 1.742133  
1.713742 0.348397941 0.9577878 0.9259066 1.08511 0.9244497 0.2790518  
0.4244794 0.199281 0.400315822 0.38260546 0.386163854 0.3561025  
0.9252775 0.2630871 0.6368152 1.36325 1.601021882 0.4981821  
1.827199 0.5356681 0.3571298 0.2964892 0.264615396 1.685807 1.895976  
0.8770842 0.6241696 1.435627 2.516052 1.489866 1.863525391 0.4380486  
1.235464 0.38990058 0.238057 1.434854 1.554696 1.983763 0.6425939 1.36810593

1.593852373 0.453693531 0.5390002 2.001613 0.6604391 0.4416818  
0.9845279 0.5043093 1.246334228 0.5534015 0.161721907 0.2504075  
1.209252 1.228789 2.547485 0.2166369 1.134928012 0.5985176 0.7951545  
0.7893823 0.7639648 0.3159692 0.739424 1.677281 1.494307671 2.340831  
0.855542819 0.2066468 0.0376325 1.815359617 4.664473 0.7709819  
0.2782619 2.077267994 0.2900662 1.12648 2.758386 0.941525444 0.6287927  
0.3038344 0.319313 0.3504269 1.416449 1.525826 0.6923814  
LINC01786 0.1848947 0.793480039 0.3820474 3.260484692 1.271411511  
0.423850826 0.5699643 0.443136665 0 0.2210563 0.834346429 1.203598  
0.2762369 1.353653 1.503564 1.436802 1.030847 0.216360573 0.06137902  
0.3778241 0.908870899 0.5266235 4.799300807 2.099053 0.9765887  
1.047631473 0.7370259 0.1487206 0 1.324437 0.3649841 0.702874559  
0.9721244 1.514883078 0.4997739 2.505817767 1.318614847 1.611641374  
2.136113 1.699629 1.144748692 1.24778 0.063908392 0.4685036 0.407445498  
1.042674 1.651514 3.356423 0.143565504 0.1648524 0.9647341 2.777364  
4.089854217 0.1885599 0.401674825 2.721111 0.5306345 2.96146 0.1439391  
1.905896 0.09593424 1.156593 3.598390597 0.04001095 0.2519001 1.200029  
0.1252529 1.857746 2.832979 0 1.090602 1.845060757 0.4351684 0  
0.828362036 0.1402013 0.244028295 3.631319 0.1721824 0.3652486  
0.1093666 0.04901183 0.3615791 0.068675265 2.448606015 0.1595089  
0.2157297 1.916929 0.497551085 0.2365787 0.6407363 0.553476 2.71333187  
0.7994561 0.9590158 0.653985408 0.5617877 2.837198512 0.287228406  
0.1969478 0.203419907 0.07867412 1.224328 0.256712322 1.566685 0.2103344  
0.24186465 1.995213 2.042877944 0.195009638 0.08794519 3.702270204  
0.3783137 1.932698 1.216482 0.5865303 0.5241613 2.335814806 2.317793  
2.362388 0.1620666 0.05791028 0.3260857 0.5708133 1.953789 0.09404731  
0.8426912 1.467687 1.419271 3.636219103 1.091651848 0.6616827 2.50151829  
0.778334279 0.2814706 2.122388088 0.3237957 0.173148 0 5.00262936  
0.072272725 1.129318292 0.1734961 0.4118567 2.905339 0.8899308  
3.670288 1.726487 1.560107959 0.6151368 1.950217 1.270914127 1.938776  
0.7059593 0.115818818 1.460585 0.5171612 0.611353879 1.121748 2.659541  
0.386436146 1.020817 1.870564 0.4056338 1.393503794 1.22255 1.375861  
0.089881555 0.136235 0.197274827 5.320213 0.4010719 0.480690989 0.9792083  
2.529068429 1.544249 2.784966 0.1503561 0.2024004 0.09455543 1.638227515  
0.5761647 0.2393608 2.538586 2.2389 0.2314176 0.02677742 1.658229  
0.5941434 1.599475862 0 2.405213 0.5541329 0.8679511 1.446859  
1.761897028 0.7271068 1.567874924 1.390329 0.6201751 0.144419172  
1.046847726 0.07051608 0.3163484 1.158133167 0.4168007 0.7281747  
1.113367 0.939599 0.6512229 1.410841 0.469655 0.1415358 0.09425252  
1.192741 1.027203 0.3065023 0 1.039743627 1.56977 1.268888 0.188189992  
0.4223117 0.4275659 1.668629 1.338534 0.3758699 2.485009433 1.391013  
0.3771364 2.597796 0 2.221027 0.099532927 0.2451855 2.560673 0.3441484  
2.30499539 0.19430086 2.688642 0.08017995 0.6209221 1.158253344  
1.042118 0.8672377 0.862165147 1.383767 2.743243 0.03168657 1.765349

0.4101575 0.2024342 2.763898817 0.6073416 0.044512545 0.5356098  
5.433216 1.838981 0.2142552 1.599546 0.8172878 1.298106 0.578032955  
1.793511 1.874789 0.029449453 0.7498406 0.1213973 0.4393246 0.3538663  
0.7709096 0.8949472 1.349308 3.73522 1.840464544 0.2154582 0.259907881  
1.109928 2.144486 0.244944 2.614180877 1.624063396 0 1.304457 1.669909  
1.360439 0.3935451 0.298039541 0.2818897 0.5360574 0.1232754  
1.228646581 0.05703254 0.06871616 0.472695772 0 0.343542691 0.2415162  
1.19286 2.313744118 0.6404323 0.8756965 18.49117233 1.394165934  
0.2375275 0.2227378 1.629705 0.536346 1.067823 2.588858 1.3091 1.087073  
0.1625759 3.149682938 0.1782861 0.212896305 0.1850369 0.743078096  
1.075903 0 0.995358007 1.390591 0.06590173 0.2829335 0.039636844  
0.1084539 0.06487275 0.174747555 1.976575179 0.2770006 0.5485136  
0.236164 1.307970801 1.480170347 1.96118656 0.3589551 0.3453868 0  
0.2202896 0.5059236 0.3596355 0.3245732 0.1552469 1.400742  
0.1525752 0.1663648 0.505183622 0.9481793 1.139574 1.429029 0.8793595  
1.409642 0.4738483 0.3144016 0.3222414 2.745899 0.845472 3.716037114  
2.278944 0.3829972 1.389757 0.06263751 1.900831868 0.8565956 2.804996  
1.144056 0.1466845 2.462756 0.1280056 0.2937063 0.815224105 0.0245554  
0.1545478 0.263208938 0.4847899 2.641342 1.403094 0.2342446 1.291633  
0.953128264 0.790445697 0.8501392 2.152963 0.5555898 0.086097996  
1.638245927 0.357930287 0.3167902 1.255457 0.4579498 0.9814551  
0.442783 0.3299362 0.2016597 2.933476796 3.150938546 0.4287016  
1.482673411 1.92643 0.507245397 0.8709923 0.8935285 0.4150855 2.1471  
1.075609 0.3710453 0.6886173 0.5296779 0.328554 0.83612956 2.951573  
0.07398772 0.335871 0.478893 2.463727062 0.3449584 1.235119 1.044286  
0.412588149 0.8291124 0.7845761 0.6325572 0 1.695858 0.4853175  
1.064102 3.081175506 3.75965138 2.472992177 0.1537557 0.661942331  
0.366353323 1.284151 0.04543918 1.272267586 1.540849 0.1048012 0.2255392  
1.364739816 0.2081557 0.3030947 0.09669884 0.40596837 0.2840374  
0.8274686 0.1112225 0.2582575 0.3082677 2.054923 0.2968032  
0.1540895 3.994167 1.195854 1.016966 0.065828691 0.1289662 1.995116  
0.3414338 1.647258 0.4982036 0.3776881 0.1047504 0.239607978  
0.118354312 0.822238873 0.3143339 1.133321 0.2189584 2.404973 1.46731  
1.895798955 0.3525109 2.348678 0.1560364 0.05523687 0.6810516  
0.09249675 0.5649824 2.278383 0.6839232 0.6698494 0.5959928  
1.895453 3.004529 0.721993287 0.20853 1.171709 0.066160385 0.1094911  
0.5906001 1.228405 2.76778 1.026488 2.120877616 2.199212123 0.759709343  
0.1009331 2.481263 0.3520704 0.05198337 0.9133316 0.3785199  
2.002622346 0.4490627 0.176656752 0 1.58511 0.2029892 1.927227  
0.0498196 1.150476305 0.6935231 0.3035835 0.4699536 0.9042162  
0.8032548 0.9456106 1.988356 2.033691952 2.55316 0.097890805 0.116506 0  
2.182500299 3.689021 1.044845 0.6484461 1.146493373 0.2522217 2.240629  
2.216928 0.268115502 0.4877968 0.1464908 0.3173926 0.4041624  
1.399898 1.675923 0.307006

LINC02084 0.01442381 0.725115818 0.253333 0.228918154 0.902916582 0.247987539  
1.459448 0.963007828 0.08739229 0.1552033 1.562115759 2.201047 0.1034376  
0.4636087 0.4021525 1.199982 0.241252 0.347214726 0.3016588 0.1929235  
0.698889972 0.4349901 3.654124578 0.379898 0.4968562 1.381924628  
0.1601677 0.3248514 0.04647002 1.541432 0.06212238 0.386207375 1.0657  
1.791321596 0.4093723 2.144708262 2.300466662 4.262100309 0.7610733  
1.636106 2.049502284 1.64347 1.286273015 0.121828 0.733504844 0.16268  
0.7730169 0.9618528 0.255352731 0.1350331 0.5142754 0.331912  
0.500137775 0.7281318 0.27346939 0.9648931 0.4821335 0.8847816  
0.3593225 0.6309866 0.5388423 0.4025509 0.646026429 0.6367437  
0.1621205 0.3080249 0.4572872 0.9420093 0.4612244 0.3213488  
0.13922 0.365764084 0.145491 0.157151 1.791570069 0.2343693 0.239864674  
0.5948936 0.0940248 0.09769162 0.4351212 0.3211706 1.932188  
0.080361339 0.518992516 0.1866516 2.991404 0.3126776 1.935869811  
0.1937851 0.2874106 0.5551352 0.913793125 0.2138274 0.4352799  
0.714252312 0.7137311 0.385547019 0.866402474 0.8849711 0.587152258  
0.6812562 1.074499 0.270356019 0.4371665 0.5742936 1.056613087  
0.4610348 1.61241751 1.564754085 0.219542 3.627353394 0.6117159  
1.206173 0.1186236 0.6222787 0.6927301 1.963917285 0.7527734  
0.3053984 0.7080064 0.2032936 0.6741138 0.8744011 0.4504261 0  
0.2835001 0.7633043 3.948967 1.50747634 0.445735233 0.6898108  
0.903833251 0.956317882 0.2634935 0.754996959 0.7746281 0.1296714  
0.658921519 2.818159722 4.972772291 3.914461378 0.01624152 0.3558942  
0.1438345 0.6664738 0.5831526 0.07922641 0.486822009 0.3564779  
0.3912126 0.892306953 3.196785 0.429566 0.447239225 2.592709 0.1708697  
2.794207473 0.4534539 1.040768 0.219636968 0.5902351 0.551975 0  
1.261019218 0.5270575 2.511574 0.81336247 0.4463684 0.90490827  
1.715111 0.8823216 0.144639618 0.8762264 0.309601429 2.256044 1.080082  
0.3096568 0.4060144 0.7228832 1.070322345 0.1048767 1.219954  
0.3853703 0.7711346 0.04332746 0.5264108 0.5346882 0.4171472  
0.689941365 0.451298467 8.341136 2.577495 0.09233139 0.1128708 0.417990295  
1.021001 0.777681506 0.5324443 1.04018 0.78220149 0.228663637 0.1815339  
0.3784058 1.727887662 1.809017 0.8804868 1.609368 0.4635667 0.553183  
0.4989433 2.431054 0.3533229 0.1323491 0.8374219 2.461688 2.76884  
0.1487146 0.820383742 0.2026912 0.5482366 2.202131973 0.8362945  
0.2301483 0.532519 4.717342 0.05026622 0.620345421 0.6673628 0.5169649  
0.3367217 0.1386063 0.4764772 0.248469059 1.970097 0.9322158  
0.9933517 0.667207835 1.637020198 0.9035104 0.3252555 2.263873  
0.377854214 3.128518 1.456552 0.792687357 1.046275 0.5205479 0.4597733  
0.02582186 0.3101226 0.6443169 1.841015 0.6948963 2.06264475  
0.08678096 1.537248 0.5738426 0.2206282 1.023213 0.4500522 0.284812  
2.061389684 0.5596539 0.7556461 0.261901296 0.1349902 0.8182354  
0.6168983 0.2300454 1.580807 0.4569754 0.1024159 0.2458587  
1.123641278 0.1176567 0.513650063 0.3069888 0.607539 0.1310284

1.435096254 0.760168359 0 0.3243661 0.375181 0.25471 0.5101061  
0.438435122 0.4178192 0.609353 1.226146 1.94644937 0.3870771 0.3377186  
1.216889707 0.3870549 0.603002054 0.3265758 0.1616238 0.366817244  
0.3815183 0.7612122 13.0881749 0.43504083 0.2501516 0.7819193  
0.3140978 0.9655584 0.6313406 4.847023 0.3472222 0.3883112  
0.4375531 0.998691261 1.051465 0.370126553 0.05196566 0.136099316  
0.1573729 0.2484178 1.038275686 0.423834 0.5243878 0.3783756  
2.319080844 0.7106895 1.563782 0.804301131 1.022553035 0.1584666  
0.8802528 0.3316209 0.82731927 0.522651391 3.222241496 0.2880249  
0.2335142 0.1177682 0.7527029 0.6935018 0.2132218 3.359155  
1.031854 0.252169 0.2975634 0.3763701 0.189167298 0.2342332 0.4444962  
0.1985736 0.4556978 2.173475 2.52843 0.358704 0.4250668 0.1272536  
0.2638243 1.065547434 0.1280035 1.703045 0.3382588 0.5375053  
6.74129595 2.249736 3.299581 1.856377 0.4806058 0.5619567 0.2546388  
0.2114982 0.213683924 0.8390284 0.3255234 0.418876853 0.9265635  
0.3999864 0.4041478 0.2466942 0.7092062 0.457565786 0.526510731  
0.9284823 0.2131733 1.133086 0.22164735 1.080500372 0.376953498  
2.253835 0.1909818 0.2296613 0.3117258 0.3768209 0.09265909  
0.9910949 4.598923356 4.812656137 0.3009908 0.337616055 0.8624917  
0.369326484 0.5218324 1.553426 0.3367646 0.6623758 0.4568396  
0.337131 3.422711 0.1652827 0.1922311 1.837707162 1.407597 0.1904711  
1.429179 0.4109479 1.132219095 0.2564415 0.2790909 0.3564127  
2.124301941 0.4915668 0.3934641 0.2537814 0.2147867 0.4574284  
0.9777777 0.7471047 2.145261418 0.674576135 2.25190799 0.129542  
0.163069735 0.514432266 0.1745033 0.5529816 1.883739705 0.2191044  
0.7848616 0.3298973 5.784579213 0.1948611 0.1013345 0.437527  
1.235129132 0.03798519 0.3277236 1.132292 1.087933 0.1803619 0.2460518  
1.073499 0.09616537 1.454081 0.08611356 0.5213407 0.585430883 0  
0.1245127 0.02905699 0.3609053 0.3313782 0.290429 0.3554679  
0.100937047 1.551132607 0.096215452 0.3089707 0.8365081 0.3202717  
0.7591831 0.3815541 1.366532017 0.0659993 0.3609759 0.4799461  
1.835668 0.4850952 0.476240109 0.3834509 0.3450225 0.1545412  
0.268743 0.1534301 2.826355 0.3906436 1.445633457 0.9481701 0.4505016  
0.83611998 0.1639968 0.2977042 0.3219857 0.6824524 0.2261007  
0.160114525 1.218094634 0.600064673 0.409442 0.8394235 0.2942715  
1.508561 3.197694 1.151619 0.411122288 0.4527188 0.661495721 0.5164279  
0.2473119 0.1520196 0.4047745 2.156993 0.167120221 0.6221775  
0.2841941 0.6284833 0.4796636 0.9242744 0.3583016 0.2389588  
1.528052301 0.3311574 0.171822479 0.08179872 0.7388607 0.229849541  
1.008669 0.7588803 0.1734374 0.882465154 0.4368084 0.6017486  
0.371702 1.019652306 0.4700726 0.2228437 0.06190024 0.4220048  
1.017353 0.5917721 0.2275234  
AL135999.1 0.2924791 0.663452915 0.2820295 2.333840465 0.651908151  
0.582476312 0.5356616 0.590829367 0.03937998 0.04079623 0.259077044

0.9785339 0.4719282 1.290003 2.092057 2.125766 0.5381191 0.381368749  
0.1699137 0.2608007 0.462122477 0.8330492 1.72082238 1.669068  
1.249301 0.610156569 0.7661485 0.1097863 0.06805477 1.240064 0.2256941  
0.565595918 0.8781494 2.944983153 0.5138748 1.955511442 2.384534918  
1.363931647 1.013715 2.079852 0.94163787 1.946283 0.146587288 0.6834692  
0.619735823 1.447783 1.716771 1.28943 0.177139379 0.2151393 1.390431  
3.566152 1.696087504 0.9843138 0.31192207 2.647883 0.1975045 1.47018  
0.08348736 0.7573959 0.1365798 1.473045 1.832414509 0.2848143  
0.08965641 0.8817856 0.1664322 0.7224328 1.310322 0.2292722  
0.4626641 2.654248964 0.0885059 0.02360469 0.736512649 0.3263334  
0.204590975 0.8281323 0.1770405 1.312375 0.1038021 0.1473075  
1.267868 0.081476436 1.688205997 0.2081658 0.09811112 1.456437 0.688677901  
0.3461686 0.2027121 0.2960113 1.837242979 1.073133 0.7998922  
0.541890909 0.2666023 2.200604689 0.262517729 0.1495418 0.10726119  
0.1182295 0.6173314 0.751257567 1.834888 0.2828132 0.229558863  
0.9947914 2.300113595 0.608145559 0.1159314 3.285598642 0.4950752  
1.900605 3.792504 0.2103045 0.7316068 0.752675446 1.084968 2.188807  
0.1153656 0.1328294 0.326689 0.8742214 1.549931 0.4016803 0.6790105  
1.453205 2.519502 2.695232682 1.183075837 0.3330394 1.936883265 1.190181835  
0.2137198 2.054691565 0.6487896 0.09312512 0.133612948 2.037901972  
0.144812878 1.124970091 0.1976026 0.6865842 0.7114753 0.7390707  
3.233201 1.386958 1.517749802 0.379959 1.493525 1.471914058 2.502303 0.6960981  
0.160308886 1.059321 0.3416691 0.534739199 0.9598208 1.172455 0.240150123  
0.7171604 1.916908 0.299441 1.347096637 1.231598 1.833643 0.151659535  
0.08979409 0.455611778 1.833658 0.2283995 0.423645858 0.583145 1.957243052  
1.332436 2.915989 0.1141649 0.5122734 0.2193756 0.723449454 0.3392496  
0.2482178 2.96837 2.358869 0.5491084 0.0593017 1.90612 1.493328  
2.217611443 0.091512141 2.940019 0.3944544 2.745969 0.5658276 1.469903449  
1.071112 1.762032769 1.244614 1.160892 0.228452158 1.021184947 0.2677132  
0.278012 1.030508177 0.4195698 0.513545 1.4763 1.582732 0.6447971  
1.319221 1.044476 0.05970427 0.1938236 1.185121 2.736332 0.08242388  
0.1558041 0.808271166 2.431794 1.042207 0.345322542 0.282633 0.7676607  
1.181799 0.5231188 0.3015353 1.713897903 2.09038 0.2088031 1.150624  
0.01338377 0.651438 0.241420291 0.1422122 0.4875781 0.1497093  
1.890266803 0.184415062 2.035661 0.2917185 0.8426389 1.204813355  
0.9720428 1.226601 0.633207718 0.7801601 1.155232 0.06014879 1.457362  
0.1397448 0.5251678 3.094119134 0.5177292 0.1267434 0.3617167  
4.406353 1.807752 0.1660726 1.653111 0.711063 0.4684395 0.914372205  
1.774577 1.960637 0.116462916 1.23177 0.1689904 0.5078508 0.6001979  
1.033653 0.2316582 0.7210906 3.162039 1.778469247 0.2385787 0.319775653  
1.268936 1.736319 0.3763986 1.59795803 0.912014509 1.186621 0.8576337  
1.769856 0.157816 0.4357757 0.195318896 0.2080925 1.599034 0.1511293  
1.068956623 0.1669033 0.03260998 0.232631036 0.1106842 0.163031823  
0.1613087 1.946536 0.879590081 1.026895 0.9538345 0.49940058 1.483624231

0.07514746 0.2642564 1.587226 1.057273 0.8134618 2.331874 1.211433  
0.8688539 0.3214671 1.542932026 0.09588856 0.149142766 0.6029704  
0.163541139 1.053073 0.1364268 0.940216726 0.9515121 0.1563718  
0.08951273 0.445171989 0.1944344 0.1795853 0.110571071 1.300041584  
0.5258143 0.2850937 0.3331093 1.526614518 1.039268541 2.013355033  
0.08922882 0.2367545 0.0398008 0.1742346 0.308689 0.1782541  
0.1768489 0.1817294 1.329474 0.1528575 0.289484 0.351619017 0.6832856  
0.2904279 1.091415 0.2931102 3.22675 0.8395137 0.2766465 0.2502378  
1.453618 0.4903894 2.218919279 4.297149 0.2044748 1.714763 0.1948658  
1.954463109 0.3236996 4.396266 1.214541 0.176347 3.467224 0.1974258  
0.1465292 0.536464218 0.2369448 0.1629829 0.391380248 0.2108903  
1.511546 1.337397 0.2408537 0.8172777 0.440719239 0.856030247 0.8467313  
1.277139 1.440719 0.040858716 1.466547669 0.290176832 0.4760644 0.4468427  
0.6105795 0.7152741 1.369012 0.266177 0.2073495 2.912813674 1.836347164  
0.09494095 1.255103042 2.530633 0.294211715 0.9809903 0.6394154  
0.3589472 2.75574 1.449403 0.6559972 1.519836 0.08378808 0.4092868  
1.282392652 2.669259 0.1814102 0.280142 0.3661472 1.736066693 0.3306172  
0.6265622 1.080633 0.735330554 0.3759768 0.345734 0.3430705 0.1395943  
1.382233 0.4506116 0.2875586 1.376909211 1.66028083 2.674350434  
0.1118818 0.347198244 0.08956262 0.8125432 0.1293819 1.244501509  
1.129236 0.2155163 0.1783867 1.876990677 0.2399004 0.1369874  
0.1121742 0.096328295 0.2374923 0.4027528 0.1407515 0.4143656  
0.2072466 1.141496 0.3841394 0.3737491 4.762987 2.177862 1.286965  
0.192644831 0.4610572 3.275239 0.5302833 1.009033 0.3359764 0.1493632  
0.2154117 0.068225102 0.131054682 0.200520558 0.1889493 0.751582  
0.1082386 0.5750763 1.477393 1.481459028 0.2676604 3.465765 0.1692542  
0.1223285 0.3466205 0.080474739 0.9562889 3.4981 1.425093 0.4894406  
1.14548 2.0346 1.907709 1.24361841 0.2733184 1.310682 0.209314078  
0.1385604 0.6827224 1.119269 1.118021 0.6638351 1.63959643 1.675653159  
0.353017113 0.01596629 2.152938 0.3222233 0.2549157 0.6819318  
0.2480614 0.728057893 0.5027151 0.160682471 0.0581771 1.42685  
0.4495431 0.785606 0.1536757 1.405717706 0.5759578 0.1547405  
0.313292 0.4434089 0.5241405 1.410356 1.215623 1.371472186 1.751753  
0.518748823 0.08293376 0 1.109092746 3.391551 0.5129403 0.3443611  
0.898740503 0.2114602 1.824485 1.732508 0.413520417 0.2632622 0.09848489  
0.2510367 0.08360494 0.6060615 1.325545 0.465408  
AL031775.2 0.3122666 1.722985228 0.6855629 0.980862478 1.221724165  
1.207974855 1.104166 0.922146299 0.5518301 0.8866813 0.508848316 1.02819  
0.6298202 1.338246 1.399235 2.854822 1.001067 0.939623061 0.8552144  
0.7396194 1.603507943 1.726499 2.674810316 1.418027 0.8605304 1.025408987  
1.166958 0.5023452 0.92221 1.949667 0.798541 1.045143909 1.847036 1.918851899  
0.9100049 2.267168456 1.784125846 1.701177005 1.857675 2.518444 1.45001501  
2.425917 0.809506302 0.9231257 0.873395991 1.222889 2.510301 0.6941173  
0.545548915 0.6786426 1.391718 1.609295 1.353459263 2.030161 1.156336618



2.088934 0.8698244 1.556342 0.4861944 1.413152 0.1822751 1.389889  
1.311194382 0.7095276 0.837568 0.7845352 0.2855765 1.438033 1.872229  
0.3381876 0.8162987 2.282086913 0.6693304 0.6615432 0.868351927  
0.938681 0.463653761 1.26491 0.6179436 0.4626482 0.5541239 0.8691432  
1.106834 0.869886694 2.457846038 0.4040893 0.8197729 1.729109 1.575578437  
0.4869577 0.6425161 0.7678381 1.634617005 1.012644 0.7730248  
1.025615212 1.118225 0.695571248 0.687220558 0.6486146 0.429442026  
0.5480964 1.114649 1.138091293 1.259374 0.3108276 0.561663464 1.535557  
1.674358785 1.411498335 0.9654428 2.185803595 1.001958 1.264843 2.118706  
0.7924676 1.054489 1.205395789 2.156966 1.111447 0.513211 0.6968537  
0.9293444 1.150275 1.77299 1.727336 1.100765 1.549225 2.596741 2.697728268  
1.323918199 0.5714532 1.111785907 0.944811333 0.9269765 1.559247782  
2.050706 0.3509133 0.891577759 3.02814025 0.457727255 1.198501755  
0.9229993 0.6019445 1.096952 1.465419 3.753347 1.243522 2.107879199 1.59545  
1.725271 0.574937343 1.786024 1.043251 1.35701048 2.094424 0.8862723  
1.047692726 1.614638 0.9388325 0.524449056 1.407126 1.442232 2.603267  
1.137511986 1.181799 2.222016 0.758999802 0.40265 0.84959692 1.294233  
0.6096293 1.261241595 1.240331 3.302055497 0.533468 3.225256 0.7237141  
1.867867 0.5589277 1.34016112 0.9730781 0.5726928 2.607197 2.354365  
0.8793869 0.2035084 0.7468174 1.379733 1.747923949 0.341961663  
2.215711 1.096721 1.149378 0.661804 1.803732026 1.957129 1.748843572 1.200739  
0.7855551 0.88852176 1.635408781 0.5805824 0.7568928 1.604496991  
1.247876 0.9992175 0.788089 0.7719948 2.04693 1.032526 1.014823 0.3585573  
0.6864725 1.369168 2.810427 1.514121 0.8048948 1.429895045 2.262634  
1.359988 0.190699192 0.3703348 0.8665335 1.393052 1.944812 0.7821673  
1.972545266 2.11434 0.7848029 2.58181 0.1071693 0.6447149 1.723025559  
0.9834665 0.9009776 0.9081694 2.727577879 0.738343266 2.415947  
0.5078063 1.448818 2.222910458 1.274498 1.841605 0.975067726 1.348286  
2.113039 0.3612269 1.572264 0.9591376 1.435933 1.795353078 1.324905  
1.014886036 0.7567204 3.389678 1.441995 0.624197 2.363774 0.3349277  
1.747034 0.557847678 2.984496 3.694029 0.596842253 1.534289 0.5535716  
1.326986 0.8964613 0.8369876 2.834 0.8314655 2.883123 3.040767507  
0.6367988 0.76817218 1.342004 1.465398 1.418342 1.512567207 1.954289619  
7.960929 0.9810603 1.142218 0 1.112017 0.377516752 1.309221 9.991089  
0.5074837 0.897857117 0.4695679 0.4352023 0.632011754 0.5237188  
0.761519631 0.3739029 2.027862 1.370831193 1.585555 1.426134 1.14254398  
1.284322557 1.053039 0.8464035 1.457148 1.201965 1.708517 2.237586 1.879286  
0.7609511 1.338542 1.544360667 0.6323214 0.539337305 0.6093882  
0.654770264 0.723993 1.050409 1.33283177 0.6144472 0.6260665 0.6143699  
0.652686694 0.3663331 0.3286886 0.516476106 2.108346857 0.5068086  
0.8932936 0.6232107 1.656763014 1.874882439 2.991143039 0.6495377  
1.50691 0.6374025 0.2232268 1.190125 0.6377536 0.8679329 1.494511  
1.364826 0.4831547 0.9482795 0.959848881 0.7673229 1.283076 1.301012  
1.113855 7.142184 2.160748 0.771594 0.7421318 2.754961 0.9370648 3.519633951

2.713463 0.6670535 1.513909 0.5818329 2.037301848 1.808368 3.552995  
1.803371 0.5945611 2.768548 1.499798 0.9157613 1.65218752 0.4665526  
0.6199085 1.300252156 1.074618 0.7872236 3.098799 0.9643068 1.164126  
0.619126052 1.69439129 1.116726 1.887983 1.50803 0.654344771 2.499566134  
1.416807387 1.203803 1.192684 1.408741 2.042361 1.223691 0.9194222 1.106888  
3.133754329 1.820542271 1.031742 1.471987477 7.744807 0.642510836 0.6178238  
2.101919 0.5958782 3.708628 1.993197 0.7741023 2.450603 1.118209 0.6762736  
1.335383732 5.008392 2.296085 0.6574928 0.2527491 1.248288378 1.413653  
0.6473727 1.267647 2.996306827 1.365272 0.4968982 1.488016 1.251923  
2.439352 0.4810974 1.404024 2.731975615 4.524113827 5.353653368 0.6621747  
0.794330798 0.928095085 1.469179 2.474921 1.512873293 0.8399904 0.5309928  
0.9998903 2.593005651 1.883314 0.6033028 0.6532544 0.977030543  
0.5139724 2.176879 0.4226454 0.7944493 1.708317 1.15012 0.9569655  
0.6831303 2.464777 0.7379543 1.288157 0.416915041 0.4900717 1.123176  
0.6683825 1.953344 0.3653493 1.025153 0.9619575 0.910510315 0.974450502  
0.82452287 0.318525 1.601179 0.9360474 2.125325 1.268563 1.68094174  
0.4018624 1.332086 0.7058789 0.7696337 0.3750719 0.849428487  
0.9661199 3.140595 1.015665 1.252512 0.6416855 3.292673 1.902868 1.219366441  
0.528276 0.6890765 0.754228393 0.8321321 1.381096 1.618219 1.846834  
0.8413177 1.559871279 1.392834345 1.202873127 0.5966266 2.209389  
1.019328 0.5596876 1.203162 0.3082234 1.379584283 0.9626062 0.671295658  
0.04658477 1.481952 0.2571197 1.032796 0.5679434 1.608022053 1.756925  
0.4272657 1.275588 0.7253823 0.296758 2.33851 1.497537 1.288004903  
2.415761 1.208951445 0.3320422 0.7220361 1.416806444 3.886256 0.9127383  
1.349385 1.161779951 1.214027 1.768016 1.886043 0.764129181 0.9086412  
1.066941 0.1340102 0.2362796 1.493225 0.8938256 0.9397794  
AL031670.1 0.1654103 1.448698342 0.3417868 0.875067304 0.201711491  
0.568777398 0.539895 0.582521741 0.09544788 0.1412579 0.142175625  
0.7083018 0.7625626 1.797517 0.6588328 0.9937469 0.316188 0.142207526  
0.3529982 0.869165 0.398249644 1.662802 0.392552676 1.888583 0.5860675  
0.985918164 0.7871918 0.07602757 0.101507 0.4391783 0.407092 0.468674399  
1.137778 0.794804126 0.574852 1.537201213 0.919213774 0.823888415 1.24684  
0.8114905 0.614468244 1.468605 0.122514967 0.7185123 0.576804527  
0.8291518 0.9407598 0.1050514 0.2862297 0.2212202 1.726139  
1.540654 0.536821248 0.2891815 0.336011717 1.264601 0.07180572 1.425349  
0.1103749 0.2495196 0.2206918 1.364453 0.566980274 0.2147673  
0.2655965 1.187357 0.2497194 0.7716309 2.05431 0.4972073 0.342119  
2.346940645 0.07150589 0 0.59139439 0.5989765 0.074849934 1.044208  
0.1320323 0.1600449 0.5031843 0.3758306 0.9011101 0.289637162  
1.204517757 0.183471 0.33085 0.5567925 0.691523496 0.2721185 0.1842476  
0.101051 1.167180821 1.050919 0.4679747 0.405965317 0.2769351 0.701809555  
0.195779003 0.1208182 0.025997611 0.1809858 0.8214802 0.098425576  
1.455493 0.5376262 0.401842389 0.735931 1.965818712 1.132205223 0.1798341  
1.082654451 0.3164695 0.741012 0.466409 0.3897928 0.922087 0.796062445

0.1088156 1.328446 0.1864129 0.1554229 0.4792583 1.05448 0.8050012  
0.6851115 0.6461892 0.9378717 0.8464712 0.995825539 1.496086933  
0.1383788 0.471137974 1.492098226 0.1295017 1.171786643 0.5517595  
0.07966362 0.458782726 0.814746256 0.48030573 0.959598903 0.4257268  
0.5101682 0.9639783 0.818896 1.213564 1.375816 0.37883339 0.8086231  
1.115659 0.730918102 0.810919 0.5593857 0.288638152 1.331321 0.7231526  
0.523948497 0.5864828 0.1671622 0.084664422 1.059054 0.9354641  
0.2281008 1.329765055 0.9621416 0.5275162 0.252716302 0.08705597  
1.300952288 0.8645563 0.2152839 0.368601611 0.3754364 1.640971961  
0.358835 2.603346 0.2075319 0.3104078 0.2658577 0.575767181 0.368177  
0.0611819 3.94587 1.684431 0.6743281 0.1026668 1.384584 1.417418  
1.202454816 0.059147757 1.257515 0.3186885 0.937833 0.1849125 1.369558634  
0.209084 1.363771 0.5815237 0.7926004 0.26894717 1.257625587 0.2433279  
0.242581 0.777065807 0.2905541 0.3722507 1.381062 0.9152293 0.5178634  
1.538639 0.7626474 0.470305 0.3433032 1.086103 2.01645 0 0.3410877  
1.207328186 1.203725 0.7110413 0.432921371 0.3238354 0.4917966  
1.337692 1.177352 0.1852863 0.940069039 1.386647 0.2685375 0.4290531  
0.03243914 0.5677065 0.076323455 0.09400612 0.5090725 0.2858901  
0.930267198 0.074496518 1.0749 0.3484052 1.40334 0.726682387 0.6337791  
0.9583995 0.543064626 0.5169438 0.966502 0.1943822 1.121031 0.2177414  
0.4346434 0.951013822 0.7503256 0.238930569 0.3475274 2.642788  
1.208709 0.2793004 0.6132789 0.3686526 0.3732783 2.174011199  
1.968557 0.7587431 0.022582316 1.63651 0.1303251 0.5960206 0.9045013  
0.3096479 0.2495491 0.3635331 1.32023 1.104494027 0 0.708627764  
1.160606 0.9736734 1.314789 1.682870798 0.778348769 4.819396 0.8127264  
1.408564 0 0.6731943 0.228541531 0.3062232 4.286742 0.2835887  
0.833436875 0.2186674 0.1053853 0.181235374 0.170719 0.362221861  
0.2880866 1.781266 0.858491778 0.848253 0.8825405 0 1.069068945  
0.2276749 0.1067493 0.8821299 1.392021 0.9265639 1.564788 0.8532634  
0.5484113 0.3116645 0.753135527 0.08202759 0.116608802 0.4824236  
0.099096397 1.031275 0.07630772 0.261687973 0.4959664 0.1768708  
0.278946 0.395124232 0.4712637 0.2238546 0.133999246 0.598290693 0.49562  
0.2403481 0.3320064 0.759006689 1.393882389 1.994928948 0.196609  
0.3825584 0.2315229 0.2195981 0.3048182 0.2757743 0.05530845  
0.2619009 1.321984 0.2729933 0.3614518 0.232429774 0.4645228  
0.1941875 0.9930711 0.240824 5.341095 1.017393 0.3314963 0.2021727  
0.7296632 0.8374154 1.334908981 1.642679 0.1468442 1.150943 0.4002621  
1.625771858 0.1824587 1.245267 1.423144 0.11248 2.006511 0.2208526  
0.3464904 1.45029465 0.3012716 0.2567712 0.302749295 0.1548936  
1.250997 2.096655 0.4490563 1.352339 0.131182538 0.489563729 1.158934  
1.492184 1.886728 0.066021333 0.599565952 0.205850042 0.4372557 0.1925409  
0.7775758 0.4300546 1.481599 0.2783004 0.1546359 2.222335709  
0.423893078 0.03287353 0.952569598 5.71619 0.432182176 1.202204 1.859753  
0.4031727 1.721269 1.053904 0.4351536 1.558984 0.03384713 0.2519405

1.421697386 1.964385 0.4538798 0.4916888 0.4590286 1.373982316  
0.4045594 0.3265894 1.451406 0.421839005 0.4238512 0.1504064  
0.06929358 0.3248102 1.256329 0.1941649 0.2379915 0.620207469  
1.153184549 1.379149327 0.2593852 0.561018388 0.025538695 1.175296  
0.4529655 1.274246954 0.8674656 0.220999 0.06485515 1.046504523  
0.3648392 0.06640512 0.2966009 0.12452124 0.06222984 0.414876  
0.2771833 0.820435 0.2954808 1.429167 0.455187 0.5710987 0.6020873  
0.7524103 1.411113 0.176674759 0.2373441 3.093772 0.5712369 0.7525113  
0.2010687 0.1241217 0.1004053 0.073494106 0.136133996 0.183897596  
0.2892435 1.136448 0.2518513 0.3431018 0.9822797 1.889848017  
0.2973421 2.01605 0.2393025 0.2117826 0.317886 0.177320003 0.4115758  
0.7450873 0.4701906 0.4402726 0.5941219 2.53318 0.7679738  
0.891969286 0.2055911 1.219373 0.48196209 0.05037571 0.661904 1.412942  
1.269637 0.625072 1.442706059 1.264793519 0.145639347 0.1289952 1.714289  
0.2699732 0.2391701 0.7003574 0.2487902 0.673527695 0.2648835  
0.135463249 0.1974108 0.4051627 0.6848837 0.757861 0.324721 1.612303502  
0.1329512 0.3879879 0.7979577 0.7858165 0.05132907 0.5524643  
0.782956 0.471944209 0.778404 0.469151561 0.2233468 0.03362362 0.690350291  
2.940833 0.6906932 0.1775853 1.054979552 0.1160446 1.126656 1.54774  
0.488288827 0.3080416 0.4774088 0.1014091 0.357598 0.395487 1.037118  
0.5493067  
AL590764.1 0.04354958 0.533983025 0.4499319 0.374383134 0.805456765  
0.524121321 0.663342 1.722190222 0.2638621 0.6248037 1.506650369  
1.799846 0.1951922 0.4199298 0.3469178 1.015261 0.267083 0.524169889  
0.4770824 0.3640567 0.458727638 0.6566792 1.03998072 0.5141813  
0.4500449 1.648779886 0.2231962 0.6305262 0.2806124 0.5311653  
0.1172282 0.583034826 0.885758 2.197206448 0.2869311 1.214153024  
1.079981225 1.727186736 0.518153 1.132998 1.071782789 1.148255 0.880588983  
0.01839167 0.819423924 0.1364381 3.100829 0.6292231 0.121734055  
0.5824332 0.4923333 0.1670228 0.728993448 0.9659797 0.258025526  
1.514909 0.3087844 0.4897579 0.6441574 0.5583995 0.4745177  
0.4400641 0.626958353 0.5088997 0.1557461 0.8479545 0.2301133  
1.312705 0.5004539 0.3234144 0.3502871 0.337438919 0.3953507  
0.1581612 0.908270998 0.3821188 0.655246224 0.3635071 0.06083304  
0.2949587 0.5023179 0.2424263 1.234897 0.630847582 0.68555623  
0.1690663 2.134119 0.6772621 1.626036011 0.1880654 0.8111801  
0.4283394 0.374101794 0.2582422 0.9651402 0.308075771 1.162542  
1.29341761 0.699080708 0.5844954 0.886389635 1.417597 0.7840189  
0.408140768 0.7238324 0.718353 0.88300586 0.5353826 0.934043124  
2.027570698 0.3107154 2.970787906 0.8262644 0.4779833 0.6088694  
0.5525988 0.9586266 1.803339117 0.4679369 0.7472063 0.9352315  
0.1227602 0.8448585 0.5866811 0.6181655 0.3987295 0.7443192  
0.6145686 2.284323 1.284697245 0.377480809 0.701329 0.682232261 0.687475009  
0.1392233 0.809840149 0.8135033 0.1957574 0.223815491 2.002076198

2.706643399 2.415535396 0.09807549 0.8282955 0.296098 1.383438 0.3806925  
0.1196035 1.194256196 0.7451362 0.8312021 1.892304106 3.082414  
0.2993034 0.531952958 1.168377 0.3869281 1.499258456 0.8286695  
1.386341 0.83868506 0.5303831 0.4310093 0.1146502 1.203480549  
0.727468 1.069419 1.50310188 1.347713 0.72486271 1.56846 0.8785463  
0.582277397 1.098932 0.274933694 1.983972 1.649279 0.2124867 0.5107803  
1.314008 1.446988146 0.3166525 0.7892971 0.3878475 0.805941 0.1635224  
0.6811644 0.6769961 0.4198286 0.819954933 0.872062802 2.781084  
1.419393 0.0836324 0.3691882 0.716288037 0.674339 0.959059054 0.5581946  
0.07303714 1.020482576 0.517800301 0.573016 0.6209318 1.074084763  
1.231613 1.243464 0.5090527 0.5921551 1.073711 0.3323055 1.483626  
0.6334019 0.3329996 1.000831 1.2194 1.927545 0.02245058 1.007581545  
0.3251155 0.2413953 1.888276602 0.4361381 0.3323353 0.5627391  
1.780374 0.094855 0.608724625 0.3194445 1.065956 0.5365697 0.2092459  
0.5558304 0.586092649 1.617009 0.6031337 1.72252 0.921521917 1.647542826  
0.7144642 0.3399365 1.778095 0.644827744 1.193431 1.027342 0.848550674  
0.5014288 0.4191151 0.3806316 0.09745438 0.5127621 1.716508  
1.377117418 0.8821512 0.88068623 0.2620163 2.005538 1.020993 0.2573719  
0.7158299 0.5605196 0.1719856 1.51708059 1.043672 0.9935607  
0.312139866 0.1222722 0.5146843 0.8118986 0.6945723 1.68608  
1.236016 0.1288428 0.1855793 0.367530783 0.2791164 0.775427644  
0.3921442 0.5582752 0.0494515 1.163058434 0.487722344 0.286517  
1.238594 1.085579 3.01208 0.6631223 0.571623653 0.4149719 2.38093  
0.8928552 1.502612117 0.6044978 0.4855563 1.4288304 0.9214188  
0.879973245 0.5119745 0.5101695 1.028416391 0.5142465 0.7248533  
1.27473915 0.23882031 0.7972385 0.6098827 0.3386966 0.8454355  
1.012667 2.324309 0.5550153 0.2829983 0.6031095 0.861523512 1.08342  
0.40832355 0.07844953 0.433751479 0.09503067 0.539094 1.06504482  
0.5027295 0.651937 0.8853781 1.652463291 1.226156 2.085712 1.13188757  
0.77184444 0.6959355 1.365779 0.472816 1.423809626 0.311936726 2.347370623  
0.2174073 0.3254057 0.248903 0.8561253 0.5617724 0.3557716  
1.197702 1.886828 0.6852327 0.6288998 0.6073691 0.678240325 0.428052  
0.4249857 0.3313303 0.2884912 1.406215 2.611648 0.4304347 0.476099  
0.2305288 0.5725278 0.756985894 0.2898591 1.556124 0.1964037  
0.796687 2.143873705 0.6725337 1.695168 1.149729 0.1658383 0.4785583  
0.3391883 0.5268229 0.230418714 0.5031827 0.2184106 0.278979722  
0.1712791 0.6587305 0.9914425 0.8275996 0.4563415 0.345380236  
1.009664982 0.9344505 0.5266068 0.9253818 0.304189201 0.315710053  
0.284532393 1.83555 0.7096962 0.8089815 0.39629 0.369762 0.3497051  
0.4749836 1.723194898 1.757754974 0.4543883 0.481363816 1.893896  
0.597375777 0.4185082 0.7215743 0.2150897 0.6896208 0.4363181  
0.3238754 2.757315 0.3742765 0.3482401 1.59264204 0.7870247  
0.2091223 0.6904154 0.5639856 1.012886137 0.4158115 0.1805688  
0.5534286 1.224466152 0.4101023 0.7721868 0.2873393 0.1247119

0.3249661 1.491004 1.660461 1.524035984 0.708430177 1.143782107 0.369395  
0.51697149 0.423604631 0.2341667 0.3531864 1.908079504 0.5237179  
0.6664837 0.5179479 1.767958399 0.3782192 0.0611915 0.6377329  
0.831899647 0.5447682 0.3598147 1.375344 1.61632 0.2995101 0.6753638  
0.591042 0.2903505 0.3135916 0.2166677 0.8383663 0.558183773  
0.01822581 1.315787 0.06579847 0.6686645 0.6114317 0.2668788  
0.3515846 0.186240746 1.48444184 0.242084792 0.5774911 0.9240202  
0.4641557 0.5928075 0.3126912 1.098466651 0.42345 0.3220126  
0.3622734 0.8196512 0.3138515 0.800651103 0.259495 0.4735094  
0.4332748 0.4958625 0.04211354 2.085558 0.5307588 0.708567792  
0.4630991 0.5618186 0.958368723 0.2011559 0.4494268 0.8159252  
0.6111704 0.341331 0.314230268 1.113691924 0.201307279 0.09509398  
1.215151 0.3020864 1.597844 1.290741 0.7832949 0.695125112 0.2684955  
1.560346313 0.5457349 0.2400122 0.3442428 0.2444258 0.4048357  
0.392453729 0.6125643 0.3813611 0.7827473 0.3194648 0.8986828  
0.3181807 0.2468236 0.661790253 0.456457 0.207512327 0.329298 1.98296  
0.40482224 0.671033 1.069262 0.4581995 0.95414779 0.7128911 0.5190999  
0.4676141 0.47363379 0.831294 0.6469504 0.1868944 0.6370761  
0.4164987 0.5401735 0.2530896  
AC107021.1 0.1763029 0.408328284 0.7083501 0.751335669 0.529523907  
1.734499211 0.8098902 0.342060087 2.1364 0.4684092 0.687534542  
5.515929 0.8428821 0.5876589 0.01950607 0.3402704 2.359068 0.353668531  
2.360582 6.419308 1.217418813 0.8073818 0.162712354 1.672376 1.214619  
0.181627221 0.7027775 1.071452 0.1262234 0.1592838 0.04218472  
0.621646935 1.219673 0.380128653 0.7346815 0.591655114 0.895379142  
0.734225466 1.742977 0.6319515 0.94601351 1.033003 0.507822262 0.099274  
0.717253213 0.7364612 0.2099694 0.0435436 2.044287383 2.200688  
1.090257 5.766166 0.421600565 0.7491574 0.441041402 0.2620874 0.4762134  
1.121527 0.7167527 0.05910023 1.677066 0.05655631 0.219344785 0.4578205  
1.801461 5.06922 0.6847466 0.7544934 0.6263965 6.328221 1.102949  
0.938305991 1.047247 1.185719 0.399474167 0.9676345 0.046537738 7.559961  
1.021573 0.0663383 0.3476149 1.339718 0.3447771 0.480216261 0.675483444  
0.7097851 0.2914155 0.2584842 0.355823011 0.8271458 1.561348  
0.2513128 1.745866317 0.5808051 1.95822 0.277153667 6.810818 0.639977264  
0.446325182 0.1502367 1.14225193 2.100511 2.16462 0.163188874 0.6703324  
2.362157 1.716879363 1.573375 0.789364821 0.619826174 0.8199499 0.817737269  
1.049408 1.59717 0.9344074 0.3231368 4.253237 2.034792824 0.03006924  
0.2860459 0.2232182 0.2392836 1.381925 0.9071475 2.558148 0.7772014  
3.16391 0.4492177 0.3508608 0.594385682 0.162413757 1.54866 0.474265549  
1.422485465 0.4652113 2.752319184 1.486571 0.286177 3.422962567 0.168855404  
1.745829606 0.776101388 0.04411574 2.175056 1.544993 0.6222899 1.220091  
0.6886316 0.462812696 1.191725 0.8658423 2.567982222 0.6722488  
1.211678 1.233212076 0.718255 3.480914 0.548654345 0.2917152 0.1108615  
1.193170342 0.209945 0.3360484 1.59871 3.897666373 0.4294833 0.196789

0.361865147 2.872329 1.07848461 0.08958925 1.657217 0.632965113 1.373097  
0.989352477 0.1784837 1.079082 0.1338114 1.323396 1.442586 0.412221282  
2.482434 0.355037 0.3489185 0.6713401 0.3530624 0.7149272 1.147815  
0.8602931 1.634802138 0.098066542 0.6254854 0.4843513 0.1003174  
0.2299376 1.595639698 0.8666491 0.758665994 0.4017341 0.2628251  
0.695098753 0.443645505 0.4482621 1.340659 0.506145094 0.1686078  
0.250733 0.2706117 2.373023 1.180594 0.7174833 0.5268599 1.649497  
6.156284 1.516422 1.097007 0.740391 0.9492672 2.001741156 0.8774494  
0.7135454 0.765632442 0.289109 0.4348774 0.2651817 0.3253402  
0.5290723 0.610813471 0.1547438 1.130207 0.1778417 0 0.8530107  
0.04218124 0.2337922 0.5425962 0.6198509 1.137502372 2.717322802  
1.942865 0.6116329 5.276683 1.227145736 1.119332 0.1945738 0.959118662  
0.7217592 0.8012266 0.5035691 0.6312436 1.022872 1.209638 1.576773846  
0.6649149 0.141480395 1.76788 0.5928213 1.920529 0.2860188 0.4406185  
1.711425 0.2836591 0.349950913 1.766057 1.820776 0.393133779 3.61165  
0.4784587 0.6874418 1.637125 0.4667217 3.361723 0.6259174 0.7234602  
0.610414295 0.9815765 0.789385645 1.218708 2.170395 0.3559037 1.887479625  
0.258099294 4.44634 1.969415 0.5944627 0 0.4041237 1.813403621  
1.702341 16.55145 1.528111 0.600796584 0.2537842 3.0359 1.26872248  
1.516343 0.791648793 0.4776455 0.9578356 2.206228127 0.7402091  
0.7316228 0 0.349130435 0.7172182 0.442474 0.8937896 1.416248  
0.9110237 0.6582822 0.3744806 0.2364081 0.5167375 0.430583829  
1.201343 1.488691261 0.04705028 0.985806532 1.025907 0.5904156 0.325407536  
1.25402 0.3560898 0.4111025 0.201573243 3.69993 1.154687 0.277712192  
1.025026905 0.0195651 0.3652874 0.3753165 1.438202797 1.535195267  
0.63607257 1.075721 0.2195581 3.326814 3.108785 1.286438 2.911042 0.3897292  
0.8289841 1.609632 2.166114 0.9870567 0.931303189 0.5692601 0.7244131  
0.4258201 0.6588191 14.60103 3.132683 3.38515 0.8380019 1.296189  
3.023191 1.127916017 2.578681 0.09129998 2.632686 1.327263 0.116186106 0  
0.5161609 0.3393891 2.797366 1.037173 1.078173 1.206405 6.156548198  
1.389251 1.50641 0.98718029 0.3338562 1.975375 2.241259 5.658443 1.657941  
0.69910609 0.753714949 7.505876 0.342153 1.576704 2.353451917 0.189347789  
1.137659463 0.2013796 0.7781264 0.2911131 0.08912842 0.5885317  
10.54974 0.2777506 0.314540397 0.4919681 0.1635122 0.917043858  
17.03802 0.573243868 2.126128 0.3245743 1.213778 1.519986 1.722041 0.8463532  
0.7087309 0.08417743 0.2349649 0.785721232 0.8496356 2.798468  
0.7569866 1.674345 2.335003775 1.676891 0.08122242 0.67767 0.087425742  
0.3689396 0.106874 0.2584986 0.3814608 1.4252 1.11332 0.05636973  
0.342766457 0.219080057 0.685985799 1.524754 0.7972837 1.312631946  
1.474641 1.617567 0.775754085 0.7935181 0.9160366 0.6810193 1.13263258  
0.7372228 0.0825744 1.393326 0.180648379 0.3095298 0.7890175  
0.5832977 0.3987013 1.469715 0.4860611 0.7203922 2.448821 0.1302073  
0.03898408 2.201085 1.192624996 0.2131538 0.05636759 0.6905986  
0.4678718 2.966997 0.9603668 0.3495897 1.020516208 0.940454802

1.328496544 0.2797455 0.5541831 0.5045608 0.5688602 1.228862  
3.494894802 1.859921 1.782718 1.034414 0.7724948 2.032917 0.293995246  
0.3052795 0.340786 1.049424 0.3649843 0.1704894 1.17049 0.5305395  
1.453380539 0.4544913 0.2128117 2.35521134 0.6681804 2.281503  
0.7652646 1.036815 1.496971 1.391706717 0.862107503 0.211285335 0.04277461  
2.217602 1.246924 1.288762 0.5109225 0.4640538 1.786726257 0.2635049  
2.161746705 3.156162 0.311887 0.3613057 1.947618 0.04750456 1.286156115  
0.1469547 1.500989 0.2987437 0.4789993 0.4680676 0.200371 0.6490676  
0.306187822 1.231925 1.01120474 7.498722 0 2.497299599 1.323453 0.1832263  
0.5594268 1.117511384 0.1763677 0.5136966 1.935123 0.532617924  
2.024682 0.4423313 0.08406773 6.18587 0.6791329 1.794297 1.07338  
AC120053.1 1.20282 3.344721664 1.775275 2.301000686 5.683824194 2.326500485  
6.099283 1.963537532 0.9543491 3.415409 2.153883444 2.107058 2.676308  
3.037645 3.400655 4.771693 1.820229 3.46853044 2.181874 1.38856 2.398223104  
2.547844 7.047147239 3.940516 3.965776 2.655310996 1.687921 1.485792 3.436929  
3.41814 3.006521 2.130048728 2.567677 4.91822434 2.525522 2.927604484  
3.676355525 3.725716325 2.444453 3.66574 2.234126388 3.195702 1.180438367  
1.83232 2.883630784 5.679457 5.854283 4.105996 1.420947377 1.465025 2.839149  
11.75928 2.568173733 5.15856 2.90152509 5.402562 2.589006 7.927291 0.7357324  
3.272474 1.537946 5.084996 4.947519174 3.011912 2.326397 2.590245 1.292078  
1.582618 2.554124 2.020461 2.211378 3.298282045 1.343261 1.560122 2.727610206  
2.415125 0.408216898 3.184928 2.280247 4.146054 2.058201 1.605604 2.436237  
1.914696256 6.375992293 1.306359 2.086328 4.271536 2.232515438 1.504693  
1.079284 1.947264 1.868158125 1.385114 2.95736 3.255963844 2.852883 2.998233403  
1.712833527 1.976756 1.016132184 1.316081 2.480106 1.028854852 2.729991  
1.368317 2.472540251 3.661551 5.472274389 2.097110638 1.614201 3.652095507  
1.510217 6.533491 3.709568 2.616435 3.073206 2.170784413 7.418236 3.544132  
2.880536 1.897112 1.344771 2.85738 2.682973 1.606024 2.055777 4.792915 8.023897  
5.068968478 2.428382566 1.760946 4.557793515 3.345462626 3.256722 4.171703738  
2.507657 1.64133 1.815257163 6.819487044 1.79670386 1.808310963 3.192517  
2.274467 3.777503 3.597691 6.266492 1.958442 3.370977837 1.776279 2.718644  
2.151328047 4.238319 1.755019 1.695266471 4.706051 1.99317 1.779678895  
2.416692 3.616291 2.135562255 2.699593 5.243556 1.922572 1.964158744 2.803062  
3.788011 2.422405617 1.566795 3.217563145 5.79567 1.817085 3.302604608  
2.228223 4.257811462 4.859922 7.062095 2.515196 2.39828 1.625685 2.640556764  
1.070915 2.428406 5.906045 3.091631 3.161491 1.287827 4.725954 6.395921 2.645041165  
0.967740887 7.467865 1.689785 2.74987 1.848873 3.095387588 4.149436 3.930910945  
3.303663 5.11518 2.085135884 2.942979118 1.376213 1.347489 2.043304495  
3.671048 1.882149 1.643355 3.327654 2.000564 2.076006 1.867847 1.282476 1.297477  
2.805818 7.761132 2.371353 1.483751 2.381198574 2.980607 1.564759 1.416641073  
2.671845 1.445388 4.520045 3.018442 2.844413 4.64197061 6.714144 2.347037  
5.487791 0.471778 2.741392 2.358768089 4.32939 6.544329 2.118897 3.953098412  
0.880293772 2.80301 1.415786 2.460066 2.960155624 2.20415 4.355769 2.060360498  
2.17631 4.883531 0.9717789 2.537839 2.19911 1.693186 2.593321659 2.304762



1.675389313 3.259422 6.66966 2.410985 1.597919 3.97648 1.105808 3.392978  
3.012121652 4.534664 2.686094 1.334228286 1.688552 1.235382 3.533239 1.781351  
3.940437 2.069842 1.703036 4.657805 5.047632747 1.276502 1.972616061 3.024199  
2.773117 2.975556 3.351787166 3.339370027 7.772164 3.210685 3.328881 1.517185  
1.983438 1.187067426 2.243149 12.65031 1.718486 3.096143155 1.828606 1.17345  
2.489359797 1.086246 2.03535041 2.057482 3.632065 2.887261819 3.510235  
2.110136 1.57177416 2.738564827 2.359219 1.90182 3.251855 2.846928 2.781273  
4.182107 4.136473 4.765545 1.954721 2.077332962 1.29238 1.589903984 2.940578  
2.386997915 2.015399 3.306218 3.94460842 2.366791 1.561764 2.901771 2.70747647  
1.28509 1.446944 1.481911498 2.574113191 0.6006698 2.821885 1.426611  
5.88894535 3.402782916 9.01083218 1.679885 3.236593 3.752967 1.212999 2.19137  
2.105627 2.865594 2.791787 4.50615 1.488852 2.377141 1.514109444 1.762377 5.51594  
2.023224 2.517363 6.299787 2.245886 1.890094 2.919875 2.766659 1.890681 4.293529368  
2.223829 1.768565 2.382943 1.659043 3.847307143 6.335432 5.582361 2.250495  
1.145096 4.334334 2.609722 2.236134 2.977473127 1.36923 1.669684 1.192486692  
1.210822 2.436676 4.463564 1.44903 2.458464 1.55012844 2.924269058 2.260492  
3.116711 2.019243 1.650309077 4.048466682 3.648664023 2.428868 3.281501  
4.286346 4.27553 3.899892 1.218836 2.41293 4.951538648 4.931903811 2.749049  
3.798588373 10.68356 2.671308638 2.59835 3.529195 2.603872 4.149531 2.485155  
1.67344 4.274052 1.753658 1.946548 2.559214372 5.783669 8.741156 1.255658  
1.919314 3.528156967 2.09324 2.434245 3.154142 4.332848266 3.043609 1.835881  
2.36196 1.894469 2.344028 2.044337 5.315451 6.308612654 4.826120424 4.136885827  
1.328901 2.258338579 0.974981311 3.40703 8.044587 2.29840022 2.759743  
2.264475 2.122244 5.416774713 1.782495 2.595484 1.797337 2.405197115 2.941375  
3.460528 1.18223 2.571547 4.619618 5.162955 1.673807 0.9666188 6.781484  
2.906645 2.514681 1.192966135 2.588857 4.048242 2.790892 2.076454 1.224525  
2.876976 2.04434 1.736897394 2.247968091 1.743207856 0.9421048 2.855926  
2.575402 5.925498 3.831182 3.0392027 2.014772 6.597085 0.9322205 0.885516  
2.497337 0.983186412 1.535816 5.464788 2.942401 3.134848 2.949435 5.850814  
7.765953 1.789287712 2.034868 1.954232 1.84458031 1.648436 3.641561 2.859748  
3.944469 2.314767 3.74337316 3.372324459 2.87929583 0.8442174 4.178119  
1.524966 0.7608924 3.972397 1.60184 2.522324612 2.817014 2.832028557  
1.025371 2.393818 1.726125 2.152722 1.597341 4.203033186 3.101773 2.586235  
2.877873 1.554613 4.292393 4.613706 2.284872 2.946919112 2.508565 0.989348851  
0.7917582 2.20052 1.9395637 5.091659 1.833227 3.034682 1.971158578  
2.179936 4.710832 3.620896 2.312632814 1.899998 1.888955 0.5161941 0.9101258  
2.362329 2.131337 2.068536

PSMA3-AS1 4.171361 8.921314726 3.571156 6.524357929 3.682194394 3.222720067  
3.800189 4.006301331 2.27529 1.686207 1.964188205 4.153298 3.234321 5.621339  
4.684813 7.194082 4.142184 2.257825186 2.046322 2.901447 3.034140624 4.959032  
6.309347786 6.679766 4.427582 4.332504194 5.259916 1.187637 2.328071 5.289101  
4.408735 4.291169891 4.190934 8.178712452 5.123614 6.847589262 5.859866847  
5.20940397 7.620405 8.233334 3.719394185 9.055554 2.146136797 7.677288  
4.262117565 4.59908 5.697947 3.614043 1.990086451 2.596777 6.145443 5.149273

5.178913499 4.598943 2.803956325 7.793325 2.120183 6.461314 1.855404 4.905215  
2.251807 8.71874 4.93868975 4.19433 1.563203 4.288524 1.640841 4.61462  
6.884641 1.354791 4.403803 12.71660588 1.39464 1.446484 3.892288771 3.243709  
2.55137857 3.27701 3.145403 6.654845 2.953296 2.148139 6.073262 2.182583169  
9.302404388 1.289436 1.708436 7.290006 4.196500747 4.578415 1.452942 2.430757  
7.276580322 4.061434 3.939873 2.753578305 3.225776 8.035354721 3.005256589  
1.952773 1.485948237 2.099975 1.684856 2.62622526 6.23954 1.580148 3.290733579  
5.812742 8.290026689 3.38140915 1.928289 5.700431162 3.693422 7.962303  
6.131195 2.639742 4.858991 7.050320761 5.833111 9.294005 3.168207 1.956741  
3.048059 4.530793 5.701974 7.332339 2.333921 6.119951 7.577748 7.017251528  
5.358571866 2.780137 7.794243451 5.099526123 3.981614 6.421906922 4.538734  
2.428929 1.954335078 6.296193893 2.487073306 4.757161594 3.332376 4.001156  
3.255408 2.597237 8.931894 7.636634 6.448916504 2.831363 6.869547 5.305036648  
5.662533 4.816379 3.229776323 6.346452 4.737227 2.778853911 6.06885 4.150853  
1.980009311 4.218021 4.040399 2.877892 4.549867941 6.041303 5.251471 2.445799772  
2.114547 5.100394333 3.903281 1.982797 2.85759175 3.605391 11.746040208  
5.359161 9.819709 1.830197 3.57563 1.791704 3.362758265 4.663131 1.132513 14.7981  
8.201523 5.685096 1.349764 7.330363 7.745475 7.839213392 2.515508054 10.88548  
3.51309 9.345088 3.923743 6.584331 3.552466 6.722608446 6.014471 3.149006  
2.678464235 6.451063118 3.254214 1.535714 4.921616555 3.415895 3.432687  
7.244158 4.678897 3.466978 6.712167 4.0247 2.84852 1.187742 7.264946 7.89757  
1.472824 2.88408 5.273925783 10.48119 6.984707 2.311574574 1.803939 4.470311  
5.091464 4.939313 3.214121 4.278616727 7.319858 2.383741 4.917416 0.998827  
3.562667 1.357659217 2.543672 3.532892 2.404731 7.790909308 2.569601987  
5.790111 3.219968 5.833432 6.046412454 5.809831 6.410968 3.244926423 5.230364  
5.215718 1.810035 5.070759 2.520989 2.72482 9.899855298 4.364105 1.895463022  
4.343304 12.89175 8.588796 2.174819 7.228463 4.262491 3.864883 5.915790529  
5.359344 9.894453 1.672048456 4.522948 2.015654 3.383516 3.507833 3.118793  
3.134929 4.88089 9.439888 6.967313995 2.543579 3.929137827 6.434573 5.542767  
3.886251 7.012313502 6.766698827 23.78697 4.950706 5.728046 1.438074 3.502559  
2.155018451 3.409157 18.57424 1.643104 4.72474737 2.645789 1.48209 3.322045144  
2.118484 2.37274675 1.315512 7.335631 6.012814308 4.468626 5.559209 6.651475  
6.417929177 1.615862 2.567828 5.765951 7.890112 4.033414 6.545892 8.68655 4.19724  
2.620014 5.911728837 1.804773 2.051099886 4.235639 1.45851866 6.676671  
2.308234 3.723578975 2.006304 1.816091 1.589617 2.417868867 2.097614 2.230177  
1.649570688 6.284676714 1.583379 2.323962 2.548191 4.599184958 5.723098923  
8.79604659 1.491245 3.456991 3.961591 1.995076 3.240294 2.725852 1.980164  
2.569087 6.293 1.702617 2.603321 3.246048531 4.905667 1.987948 7.011261 3.52492  
27.62186 5.446346 2.312978 3.920833 4.771983 2.407481 9.536282802 13.38727  
1.557978 7.471061 2.339104 8.982642808 2.138483 13.36528 5.356665 1.82613 11.0029  
2.650073 3.075468 3.519985623 1.253061 2.680578 4.075024303 3.021022 6.099814  
6.932553 2.244321 5.199143 2.961301048 2.566020772 4.652415 7.04649 7.357216  
1.341322878 7.295761463 3.977692953 2.662859 4.350744 4.627175 4.101634  
7.879194 2.414697 2.904292 9.580630738 5.270560318 2.000658 6.825534291

17.90275 1.728769538 3.741484 4.769729 3.788006 13.34948 7.51649 3.960981  
5.594446 2.111866 3.369713 5.525073202 11.26719 7.400055 2.181812 2.815719  
7.543123969 3.225874 2.365064 6.472938 4.113741634 3.589903 1.604502 3.3756  
2.71537 7.556762 2.591848 5.731579 6.418895573 13.666731109 9.959374504  
1.933325 3.666636965 1.927842266 5.527056 7.236292 5.249561217 3.78812  
3.267215 2.125777 6.507012764 2.71371 2.719227 2.914748 2.029491168 2.719635  
2.463643 1.975321 3.052675 2.32655 5.919638 2.494106 1.758636 15.46826 6.20371  
7.111897 1.688733814 4.979165 8.104335 3.909347 5.006345 1.688473 3.39218  
2.291925 2.04560662 1.854088427 3.548755899 2.72927 7.515132 2.421923  
6.533029 6.969856 5.780925335 2.760533 7.665114 2.579064 2.929649 1.898545  
2.339238312 5.81315 11.09625 4.07089 3.999761 7.828275 8.735052 6.879567  
5.615644105 2.648459 7.290044 2.608852497 2.127277 4.174254 7.051054 3.605254  
2.146858 8.33254225 7.852246962 2.600529224 0.9644293 7.100054 3.856852  
2.308973 4.259792 2.218385 4.206074548 3.664209 1.324085156 1.927682 6.334327  
6.181387 3.503693 3.05282 6.611706111 5.226135 2.365936 3.707194 5.346726  
1.089175 6.943381 5.614868 5.489856588 8.455672 4.083727198 1.43994 0.9836849  
7.140257846 13.82094 5.026744 2.139092 3.935649148 2.240613 7.027144 10.10353  
3.638612163 2.262932 2.698048 1.107972 0.9320909 2.543114 3.149396 2.696113  
AC018653.3 0.2949847 1.249493104 1.260611 3.262973612 2.727895559 1.901868808  
1.750586 1.459886441 0.8123999 0.4168008 0.914313474 4.749866 1.021655  
4.668855 3.658306 3.530391 2.048316 3.025980754 1.028216 2.256719 1.468862237  
1.36137 4.482766769 3.166205 2.217015 1.80263861 2.187568 1.596192 3.945472  
3.442116 0.1876844 2.326974353 3.194653 3.122278099 1.630941 3.437096606  
3.585927781 3.342618024 3.565219 2.874412 2.341054768 3.042918 1.348662216  
0.2831288 1.350096856 3.07496 4.003615 1.013358 1.149400767 1.165607 2.15715  
8.189321 4.280550947 2.604933 1.588859475 4.807737 1.656952 3.385935 1.273477  
3.256453 1.106173 1.161347 8.214625653 1.357929 2.109904 4.615133 1.100887  
5.119437 3.309451 0.5310689 1.33733 1.90786076 1.825856 1.63943 1.951306096  
1.481516 0.594609403 6.35966 0.7491907 0.3632571 1.070707 0.9596592  
3.369448 0.941270526 2.673611148 2.654728 1.748275 1.769268 2.002548166  
1.170929 2.822786 2.889905 3.786590771 2.305781 4.602743 3.048841462 1.484112  
3.026531385 2.02740865 1.268283 1.858729988 0.9585031 1.231922 0.251323323  
4.116343 1.921911 0.806830931 2.681363 5.925905485 1.030339911 2.117398  
4.737171843 1.182197 5.872599 1.874636 2.126732 1.542828 2.973755746 1.564212  
3.210993 0.6816695 0.31497 1.359728 3.465879 2.82951 0.2455281 6.588551  
2.258794 4.391435 2.621884483 2.273905304 1.361018 3.036193955 2.525872981  
1.236967 3.39841317 2.989961 1.069817 0.229700377 3.987436589 0.880513499  
2.350668919 0.2566683 2.371018 3.257631 3.639885 2.651892 3.638259 2.885008803  
3.581478 4.431408 4.581943406 5.425815 1.197975 1.650418151 2.877834 1.138358  
2.503613551 1.397709 2.902497 2.94251951 3.135334 3.131782 2.0709 4.621610292  
2.533759 2.065367 0.534486502 0.3951854 1.236054792 9.060311 1.849829  
2.524807142 2.218058 5.773047921 3.013483 6.56669 0.7981499 1.245524 1.28913  
3.846239313 1.23956 2.464868 2.343492 3.216624 0.1208318 1.165124 2.902112  
1.622934 3.111328888 0.268497707 3.900751 1.853543 2.265949 2.465735 2.635936504

5.002675 3.095378454 4.399653 4.27258 0.70020462 1.275396161 0.5522862  
1.514125 3.385716116 1.137597 2.719538 2.379465 3.502705 5.667131 2.660135  
2.127683 0.3284494 2.255585 5.254662 6.418215 1.360309 0.5944548 2.081074649  
4.015744 2.038566 2.161742744 2.487745 0.5860264 2.128631 2.226884 1.308371  
3.488877366 7.807726 2.180153 2.312847 0.01840694 2.51667 0.736239743  
1.297986 7.531072 1.285302 3.695030778 1.014517465 3.159641 1.034995 1.663692  
2.458776529 4.471863 2.097609 1.996283695 2.254005 2.790501 0.9513227  
4.272718 1.38654 1.62071 5.103393911 1.614941 0.89093049 1.201112 5.998389  
2.838689 1.146674 2.482349 2.98088 1.906284 2.119874405 2.723688 3.172353  
1.947710405 3.225019 1.574087 1.808635 1.471291 2.076496 1.309815 1.634369  
3.542534 3.359932035 1.078114 1.06806928 1.712263 2.283632 0.3806381  
3.34218997 2.632284431 0.2205379 3.121735 4.504929 0.63141 1.304037  
1.426494596 0.8994648 4.564964 1.206876 2.714132964 0.4839058 2.212555  
1.908223515 0.9410331 1.550859226 2.125097 3.332724 4.790151114 1.583303  
1.698297 0.39247694 2.941196696 1.395247 1.320486 3.323076 3.285159 4.181628  
4.916622 2.800576 3.223877 0.5305435 4.450352302 1.473922 1.323346714  
0.2254343 3.711197873 2.399222 0.9958836 1.484896133 2.912761 0.6308456  
1.547649 1.414218379 2.107813 0.4939738 0.696989292 2.399049263 0.3883647  
1.90933 1.130342 3.276268515 4.101540731 6.565498984 1.517241 1.05198  
0.1970595 0.6038624 1.242189 1.836063 1.88302 2.134586 1.945658 2.091212  
1.025493 1.846426855 2.143054 1.707911 1.671064 1.530488 5.339801 2.680318 1.90666  
1.338386 2.271266 2.605796 3.394036786 5.533138 2.083095 2.684884 1.489912  
2.560765421 2.795379 5.411929 3.672624 1.161607 3.388875 1.169639 1.759651  
2.213426792 2.35057 0.806952 1.992752864 1.230478 8.180215 4.711859 1.59255  
2.431767 1.276061328 1.732900182 3.781281 2.233873 1.338232 2.004243047  
3.369716119 3.523632416 2.798152 2.88156 0.9393714 0.5643099 3.205183  
1.091056 1.389297 5.259376131 4.305480914 1.175166 3.243099548 6.924407  
2.648517949 3.986884 3.443544 2.179357 4.140357 2.383401 0.6267949 3.096149  
1.651705 1.393846 4.03356892 3.416648 0.4828969 2.178849 1.840631 4.054121866  
1.500964 2.149673 1.353686 0.753996969 1.539238 1.645941 1.474472 0.3071784  
2.826502 1.560812 2.450075 3.150560756 4.226020349 3.130282951 1.458449  
1.834237147 1.37668511 4.560143 0.2965687 5.660094324 4.090568 1.185614  
0.6869476 3.678373157 0.9445321 1.055047 0.9817516 1.448470352  
1.677276 2.187957 2.165654 0.8668666 0.7880241 4.533015 1.279693 1.150967  
4.515621 1.013983 2.897299 1.503758448 0.1683452 6.11531 1.580168 2.653485  
2.281849 1.490777 1.492693 1.918327075 1.506307073 0.939141156 1.230941  
2.560453 0.809812 1.119446 2.857814 4.33891941 1.257737 4.103029 1.483962  
1.081546 1.726476 0.975981928 0.4302061 3.950852 2.626956 3.830633 0.6223802  
4.123696 3.794843 2.862253287 0.9462305 1.183528 1.41057982 1.133859  
5.218643 1.689011 5.698925 2.719249 1.800996419 3.811687882 1.590822665  
0.292783 3.153385 1.750753 1.956519 2.002915 1.646995 4.17340382 1.082181  
1.268287598 0.752113 2.873768 0.07065884 1.870644 0.2601267 4.349945154  
1.458516 1.570446 1.299932 1.757354 2.097047 3.174034 2.18629 3.1087543  
3.453211 2.00190433 2.116452 2.61383 4.285239376 6.261661 3.245098 1.370435

2.92662125 0.6365229 2.33344 2.361154 2.070731751 2.384663 0.7648831  
2.244159 2.881348 2.708964 4.093858 2.337698  
STAG3L5P-PVRIG2P-PILRB 0.3809276 0.583842886 0.2395552 1.177367598  
1.767220892 0.562382217 0.5586012 0.238165646 0.08362314 0.2821681  
0.361229609 0.6393572 0.3229107 1.277607 0.7916051 1.938109 0.6002023  
0.332239689 0.2762779 0.2953646 0.444862481 0.5410982 3.576773831  
1.109342 1.038333 0.75500409 0.7568677 0.3596873 0.2934744 3.256115  
0.4681144 0.874603141 0.7527726 1.987242508 0.4029083 0.907461193  
1.272429733 1.263184078 1.058103 1.577033 0.938256177 1.614178 0.107336974  
0.9827164 0.741174177 1.224555 1.787906 2.337737 0.351077445 0.1605887  
1.415074 3.588846 1.643631189 0.709396 0.471014853 1.50679 0.9352611  
2.201217 0.1321578 0.6620681 0.1482357 1.593886 5.623084041 0.08601622  
0.1650002 0.9362332 0.2053189 0.7072377 1.679821 0.08712197  
1.059063 1.994937477 0.1044121 0.0852115 1.174424375 0.3767588  
0.347558162 2.004525 0.0771168 1.724674 0.2351181 0.3490264 1.133604  
0.143025503 1.843660422 0.3697052 0.3623276 1.927838 1.090535088  
0.2304597 1.531713 0.3895414 1.907338595 0.9053782 0.78095 0.41843712  
0.4151608 2.041350402 0.162948331 0.3122587 0.382651066 0.1374221  
0.6785833 0.551884425 1.570694 0.3626864 0.395389788 1.09609 1.786865107  
0.378060106 0.07089976 1.551369912 0.6654314 2.748324 2.737801 0.6777513  
0.6918532 1.423941582 3.12698 0.9401642 0.1270258 0.120606 0.4344892  
0.8087994 1.453644 0.7834649 0.9341226 1.767529 3.051173 3.55961986  
1.448057203 0.4283654 2.512001342 0.910715322 0.1890969 1.414451032  
0.7879482 0.06979434 0.15604946 3.925954489 0.317220094 1.09498291  
0.6993466 0.6512919 1.242433 2.385506 2.194304 1.20537 1.453376634  
0.4250672 1.593025 1.439300976 2.084007 0.4268484 0.392936118 0.8442426  
0.4986758 0.797276817 1.411307 1.001739 0.793679058 0.9520558 7.944389  
0.4759876 1.631034508 1.327098 1.807061 0.418662541 0.3477952 0.339283767  
1.619048 0.3233366 0.701234015 0.8552043 1.73044045 1.835979 5.053454  
0.1575786 0.4273537 0.2286865 1.609613241 0.3655733 0.1143515  
1.742342 1.095462 1.019886 0.1043394 1.430907 1.334955 1.306323228 0.051820128  
1.659933 0.4606919 1.012482 0.7452195 0.895051833 1.325011 1.23254879  
1.091137 0.9721707 0.224539768 0.787685738 0.2463445 0.4439483  
0.651620532 0.5803929 0.4362039 1.187967 0.7779597 1.536122 1.348022  
0.8129346 0.1141035 0.2374519 1.011647 1.540288 0.2223868 0.07257335  
1.345146434 2.207386 0.8983632 0.389402455 0.6460005 0.5285333 1.12611  
1.306559 0.436492 2.01672379 2.135349 0.6153196 2.088925 0.005684072  
0.7584971 0.236266872 0.4886693 1.752163 0.416169 1.715615676 0.156641709  
2.325003 0.1867365 0.9835874 1.079957205 0.9077331 1.113843 0.719884993  
1.320565 2.10197 0.0638628 0.8857884 0.411207 0.4406363 2.099653199  
0.439758 0.197368487 0.6587696 4.608971 2.04145 0.256214 1.411312 0.3617392  
1.428048 0.565856328 1.786105 1.749328 0.170148111 0.5076312 0.06850774  
0.7855425 0.4279206 0.73494 0.5520489 0.9309888 4.356139 1.424613116  
0.09167415 0.337580718 1.14562 0.8454654 0.3667286 1.053751799

1.140172899 0.8308469 1.204991 1.530236 0.09748983 0.3091336 0.308923571  
0.1988474 2.222534 0.1822009 1.009560137 0.1724196 0.02308237  
1.294961085 0.05982765 0.357736996 0.2199455 1.412967 1.84022592  
1.005229 0.890867 3.27232018 0.993390532 0.231384 0.3292062 1.219379  
1.341524 1.702839 2.770508 1.723775 0.6342208 0.316742 1.761068688 0.0958206  
0.290141514 0.6265278 0.408052383 0.6053539 0.1738209 0.810081235  
0.9298785 0.2523615 0.3475744 0.335522041 0.3885932 0.07409052  
0.129138351 0.915550865 0.4590317 0.649264 0.5024208 1.391699228  
1.186307297 3.006187587 0.1722517 0.165004 0.06761341 0.1006362  
0.3204663 0.364025 0.5717862 0.2753458 1.491192 0.1571708 0.2682404  
0.380118258 0.4246691 0.7740923 0.6780332 0.7215825 1.871762  
0.585745 0.1927388 0.1928707 1.596342 0.7336706 2.145640135 1.873987  
0.5725021 0.7282576 0.2356535 2.46561645 1.381143 4.443325 1.403971  
0.1300797 1.944065 0.2106912 0.2883866 0.394331031 0.1550695  
0.1903513 0.272315775 0.6839499 1.920636 1.455024 0.2911338 0.4572333  
0.499127812 0.882335766 0.7911327 2.414373 0.8451562 0.225584417  
1.805988844 2.392615848 0.9917656 0.7169223 0.5449955 0.5698745  
1.373768 0.1108285 0.2077338 1.961264004 2.109428738 0.5817788  
1.486052999 2.014466 0.454368585 1.071991 1.978093 0.2565528 1.527696 1.86006  
0.3489847 0.7137647 0.09489252 0.342129 1.680295348 2.357054 0.5467688  
0.3282095 0.5576633 2.028342293 0.3326282 0.4806972 0.8360376  
0.801985776 0.5941466 0.4066139 0.2003398 0.09485682 1.324686  
0.7314747 1.131898 5.112870999 7.034354013 1.890975194 0.1941961  
0.692802922 0.138723675 0.9851652 0.2625309 1.001257358 1.050894  
0.1091313 0.3560748 1.3141608 0.3436135 0.2036244 0.06929493  
0.283646208 0.430711 0.9193864 0.1457064 0.5601635 0.4607969  
0.9438997 0.3299125 0.1932375 3.687889 0.9269951 0.806845 0.190166984  
0.454003 1.000798 0.2377224 1.808325 0.4227815 0.4821013 0.1196344  
0.10946156 0.294196333 0.437312418 0.160493 1.26507 0.3530404 1.330137  
0.9169176 1.40608896 0.1563032 2.157226 0.2845332 0.1558582  
0.656474 0.133603052 1.225996 5.748972 0.7763487 1.461483 1.241235 5.184553  
2.399767 1.476701305 0.2121426 0.8602697 0.240017679 0.06767339  
1.098763 0.9705111 2.702834 0.9086664 1.443228206 1.349422274 0.52952567  
0.09041151 1.782488 0.2973484 0.2933561 0.8639381 0.4577335  
0.703383071 0.8215204 0.498460762 0.1087141 1.521293 0.6709489  
1.706408 0.1840833 1.002118249 0.9085461 0.5529387 0.6539979  
1.097493 1.263659 1.379461 1.462174 2.319063996 1.620195 0.322247403 0.1761093  
0.2003151 1.037366458 3.435336 0.8374936 0.6534564 1.417231566  
0.3083935 3.311648 1.169268 0.234162164 0.8559029 0.2361962 0.1385995  
0.3592465 0.7919802 2.006894 0.4950049  
RUSC1-AS1 0.4810891 1.411318958 0.4134229 2.533204649 1.196184709  
0.869649133 0.8316032 1.242311279 0.4994318 0.166641 0.748443867  
1.523318 0.8866923 3.367202 3.089182 2.671828 0.9826467 0.762140932 0.47464  
0.7517212 0.686721536 1.233907 2.912995411 3.197367 1.852352 1.174197252

1.148324 0.3037859 0.4007665 3.039633 0.4260224 0.954184286 1.41464  
3.199091824 1.153035 3.502891331 2.383034259 3.096084089 1.31645 2.835433  
1.745399894 2.743552 0.410278791 0.7709123 0.78197124 1.859376 3.166945  
1.838937 0.297445185 0.2886324 2.060555 4.177315 1.548266922 1.265539  
0.863108595 4.283028 0.5738331 2.44085 0.2100136 1.498912 0.6508712  
2.825515 5.430013301 0.6479931 0.2848384 1.474141 0.336259 1.302562  
3.095588 0.4674607 0.9041114 4.725296538 0.4217749 0.1687322  
1.537860895 0.8649961 0.416576288 1.836729 0.3349624 1.697712 0.4148837  
0.3504012 2.435568 0.521041348 2.70980222 1.018196 0.2950868 1.720508  
1.356617398 0.8025406 0.447955 0.5460549 2.558782854 2.196243 1.19996  
1.135944913 0.7084318 2.590587456 0.349232491 0.4425275 0.187972491  
0.3673249 0.8429334 0.458829467 3.512316 1.099679 0.441114069 2.081993  
3.448202431 0.841389099 0.3378986 3.685110234 0.8078928 2.288812  
3.542407 0.5248745 0.9177295 1.211753756 2.408643 2.744332 0.6187432  
0.2661551 0.6383295 1.866323 1.501917 0.7204008 1.828917 1.90745 3.61236  
4.138215904 2.795817016 0.5748664 2.843022494 1.504702127 0.4846002  
2.13050097 1.081345 0.1515784 0.169453025 3.3976147 0.390161713  
1.322633708 0.5164026 1.539273 2.80835 1.571123 3.571713 2.59311 1.331616039  
1.209504 2.018916 1.52319151 2.224434 1.345901 0.557649819 1.845577 0.6169647  
0.734582005 1.703636 1.399484 0.801440494 2.895602 2.343582 0.5287083  
1.816310917 2.450316 2.293503 0.25353961 0.443926 1.122547627 2.261899  
0.4213308 1.552988136 0.6471208 3.621899546 2.464786 4.856718 0.4475275  
1.033589 0.5334476 1.434147978 0.6164765 0.4384877 4.955231 3.414578  
0.6077674 0.207068 2.908693 2.538036 2.283371409 0.118169346 2.791498  
0.6468035 1.899569 0.8737324 1.961468585 2.055457 2.376371581 1.701217  
2.390346 0.376274962 1.990707788 0.5092861 0.4769519 1.240923136  
1.066993 0.7924025 1.342561 1.778486 1.383015 1.925822 1.338248 0.2822262  
0.195964 1.81096 5.245571 0.5142805 0.3569489 1.950469822 3.403955  
0.8758376 0.439324076 0.7394057 0.6955789 2.119212 1.826612 0.7716923  
2.397822071 2.090437 0.534537 2.058425 0.1604797 1.870083 0.363057392  
0.6200767 1.45986 0.4142554 1.712521106 0.439415041 2.514646 0.5381361  
0.8773438 1.925510833 2.044805 2.296217 0.813166549 1.547883 2.082389  
0.1987981 1.911669 0.4419235 0.7915659 2.84870603 0.8073705  
0.33771805 0.7874898 6.401001 1.533231 0.5783246 1.867047 0.9013588  
0.8641349 1.939764175 2.765611 2.55304 0.236324324 1.350732 0.2586011  
1.104482 1.135875 1.033737 0.1839945 0.649139 4.538705 2.527702853 0.3353207  
0.653096167 2.598457 2.416663 0.8934603 2.938351201 1.220333984 3.490521  
1.712934 3.513391 1.217431 0.9231366 0.646067186 0.4249992 6.905104  
0.2787896 1.123853575 0.3702979 0.1704419 0.643705163 0.1995397  
0.676679438 0.2936524 3.673236 1.671592879 1.337918 1.058649 2.10571246  
2.601246305 0.329235 0.414355 1.878938 1.745694 1.791701 3.230668 3.278894  
3.314089 0.4862711 1.818445153 0.3069502 0.355000177 0.8369289  
0.622227288 1.339227 0.5081755 1.248953486 1.632584 0.3798065 0.3892233  
0.740248495 0.3481258 0.3360154 0.195472734 1.973202183 0.3772125

0.6097567 0.8556916 2.965737224 2.269510335 4.695127342 0.2319382  
0.470339 0.1615261 0.2571298 0.4903525 0.4617572 0.5945894  
0.6523551 2.806219 0.2968186 0.4490573 0.560184842 0.9837765  
0.669694 2.032891 0.5636144 5.722548 1.272113 0.6336152 0.4616161 2.93934  
0.9714452 3.214041324 3.079025 0.7264529 2.465705 0.4935109 2.576060095  
0.8748677 4.819591 2.722697 0.1797761 3.993022 0.354855 0.4581981  
1.037198778 0.4442599 0.3795784 0.533806592 0.5540751 1.779565  
3.081263 0.3674062 1.351802 0.652538785 1.219831613 1.391994 3.2198 1.75154  
0.270084712 2.140381265 1.638515983 1.303435 0.8655099 0.9020282  
0.9001058 2.43146 0.5295307 0.5394225 4.274916086 2.145434266  
0.469121 1.859256867 5.829245 0.871665724 2.470467 2.154205 0.682341 3.588382  
2.345324 0.8375335 1.827639 0.4636941 0.4973514 1.914791285 3.404553  
0.7664547 0.5880607 1.129607 2.333278714 0.8200985 0.8948326  
1.672852 1.296273109 0.8709925 0.6336905 0.4944263 0.3193135  
2.386262 0.7943033 1.455537 3.130041845 3.880989958 4.251121893 0.3050975  
0.665895912 0.281840851 1.819237 0.716016 1.810834575 1.74731 0.4281469  
0.4277932 2.710266146 0.407837 0.3158776 0.2539582 0.355395518  
0.3315385 1.411628 0.3772975 0.8182142 0.8601972 2.447387 0.9172766  
0.6295057 4.393164 2.120608 1.572119 0.374583223 0.8618069 2.917432  
0.6566747 1.421599 0.4782245 0.4014893 0.3324171 0.873996676  
0.643248616 0.479873199 0.4035918 1.710804 0.3753774 1.224057 2.40593  
2.561366735 0.6531978 3.043226 0.445571 0.3787873 0.5400459 0.310400783  
2.048471 4.365539 1.551866 1.228656 1.273935 3.840164 4.797761 1.609392033  
0.7562898 1.642414 0.506787423 0.3993808 1.173254 1.756452 2.358087  
1.105649 2.685187973 3.246183458 1.101521829 0.211081 2.16141 0.4843328  
0.4436993 1.540476 0.4418219 1.189270608 0.8366431 0.289968794  
0.3380576 1.255491 0.8825873 1.49608 0.4506718 1.690172497 0.7504784  
0.6644127 0.9060812 1.495197 0.6738911 2.384889 2.038611 2.155158195  
1.840146 0.671287032 0.3187265 0.3582694 1.56829965 6.240439 1.124958  
0.7501314 1.94414755 0.3680027 2.770762 3.244252 0.513440043 0.7870755  
0.427473 0.3820491 0.2540207 1.44051 2.385187 0.8062836  
AC027796.4 0.2170503 0.665340406 0.4111163 0.789427136 1.955724454  
0.870737024 0.4919769 0.483046489 0.03653011 0 0.199517624 2.842269  
0.4053477 3.003732 3.277957 2.74499 0.7664121 0.653113283 0.1801341  
0.8870654 0.190524179 1.018229 2.14090549 1.5606 1.021818 0.726716694  
0.5562028 0.6692427 0.0971227 0.9874918 0.2142298 0.304933292  
0.8108452 2.339922374 0.2016751 1.442790727 2.233957664 1.403179065  
1.253806 1.317596 1.461421021 1.822466 0.075022895 0.7944192 0.662269271  
1.518677 3.434328 1.688635 0.235946785 0.1693321 1.667312 6.763562 1.773391546  
0.6640586 0.192899175 0.8227867 0.2381748 2.12658 0.239377 0.9549691  
0.1689277 1.166263 2.922218927 0.07045407 0.0184818 1.56778 0.1617396  
1.105561 1.409795 0.3134233 0.1745825 3.733062826 0.1277125 0.08758581  
1.458637498 0.3291682 0.243497799 1.296618 0.1179075 1.316937 0.09629012  
0.2301425 1.114214 0.040309395 1.111815775 0.2808744 0.4115279



2.778789 0.602334262 0.2082921 0.344744 0.2011077 3.224059767 0.8580498  
1.381665 0.822559287 0.329745 5.694293227 0.35591346 0.1849596 0.159198188  
0.3694263 0.4491421 1.0547528 1.87452 0.4526763 0.21294605  
1.008038 1.199080532 0.376090017 0.1376533 3.130696432 0.8276547  
7.921961 2.826337 0.4360725 0.6696127 0.73628945 1.027274 1.99409  
0.06341737 0.1869495 0.3349468 1.3554 2.344927 0.6624202 2.627685  
1.675077 3.332202 1.341561582 1.281504344 0.5825685 7.341412374 1.903534922  
0.1486899 1.395239473 1.140324 0.1422825 0.53708889 2.624503706  
0.395928839 1.451127559 0.8146774 0.483484 1.672513 1.540935 2.608876  
0.9935028 0.854667839 0.9284363 4.814976 4.475828012 1.474198 0.6491757  
0.288917594 0.9867037 0.3214071 1.329811954 0.448921 0.4350425  
0.453642433 0.8106488 1.527568 0.2380894 2.581011374 0.623165 1.009463  
0.140684174 0.02665467 0.509483683 2.523003 0.3295765 0.806127746  
0.6423707 2.32944965 2.499487 7.566114 0.0882525 0.441258 0.6844991  
2.744476258 0.2442437 0.4370936 2.617638 1.834832 0.1901649 0.09430308  
1.232857 0.8330923 1.601521228 0.045274427 2.502657 0.2845954 5.163966  
0.2123108 0.963324284 1.06695 1.634517239 1.038625 1.911083 0.181645231  
0.634935904 0.4759835 0.1031571 0.74350261 0.3558457 0.1780862  
2.806197 2.027149 1.797942 1.324963 0.8270012 0.1661507 0.2766107  
2.297161 4.4134 0.1799035 0.05594664 0.749777858 1.46151 0.802073  
0.441837372 0.5720275 0.6399546 1.023931 0.670123 0.1891022 1.808654692  
2.91886 0.4585369 0.6099174 0 0.9505755 0.311581337 0.2158699  
0.5566681 0.2693335 1.477544242 0.171069235 2.050202 0.2353107  
2.109998 1.133073923 1.054617 1.287549 0.46990678 0.4581705 1.784236  
0.09299319 5.35901 0.1296317 0.8555044 1.539094157 0.3168739  
0.052253858 0.2781051 2.3085 2.133104 0.1257585 1.126637 0.451494  
0.5714489 2.439586293 2.476972 1.192121 0.069142195 0.7786806 0.07125492  
0.6347432 0.8077383 2.240905 0.4297869 0.5565301 2.809028 1.221177797  
0.04215487 0.186455653 2.132116 1.109661 0.5134695 2.045880686 3.002751996  
0.2379993 1.914149 1.921121 0.9049878 0.3553752 0.424845184 0.1240927  
1.797956 0.2894292 2.052538352 0.1673781 0.0605001 0.524075747  
0.0746721 0.151233467 0.4095275 1.087086 1.33616289 0.4271658  
1.160162 2.64719858 1.363857979 0.243982 0.1634217 3.601189 1.113949  
1.467951 2.556415 1.203803 5.960866 0.2385624 1.391514903 0.08371695  
0.071406214 0.1954955 0.398228053 1.401159 0.07787927 0.751155267  
1.404652 0.1160444 0.2372424 0.395506767 0.4668232 0.03807748  
0.085474347 0.824326834 0.2529136 0.5672517 0.2425815 1.680688685  
0.884037667 2.560679701 0.2407897 0.04505045 0.05907277 0.2327407  
0.2757441 0.3377446 0.1058391 0.1822464 1.359751 0.17911 0.09764892  
0.326172904 0.7729723 0.9290003 0.7077189 0.2027716 2.384854  
0.4450054 0.3229452 0.2407258 0.973417 0.5789645 1.454101479  
4.333958 0.3372041 1.142018 0.4044204 3.733322791 0.8379739 7.343858  
1.104263 0.1549753 2.330918 0.2441845 0.1591319 0.650761503 0.2017813  
0.1663069 0.401679728 0.1897004 1.413557 2.386199 0.4812198 1.005984

0.545100111 3.26554531 1.14584 1.239394 1.805236 0.151607341 1.617201266  
1.102969961 0.6507972 0.7921658 0.3455956 0.7612373 1.772007  
0.2517557 0.1578206 2.447893419 3.179780089 0.2264663 1.011388855  
2.998894 0.760868095 1.533704 3.021902 0.2273946 2.176803 1.309438 0.5508741  
1.193318 0.2072652 0.2651645 1.963086793 2.451573 0.1519965 0.537659  
0.5856029 1.577564363 0.1905652 0.4749746 0.8044977 0.726513915  
0.5353182 0.345384 0.3978038 0.06215618 1.096621 0.2848603 1.093018  
2.170219269 1.452778332 1.979371209 0.1985454 0.490776465 0.136839482  
1.361596 0.05334165 2.026935627 3.560405 0.1999197 0.1820248 1.824597798  
0.0698162 0.05082955 0.05675802 0.333600095 0.2619848 0.4483275  
0.1142448 1.407584 0.2261747 2.047651 0.3800958 0.3014795 3.065757  
1.151859 1.335952 0.135235027 0.5450225 1.457302 0.3461572 0.8228671  
0.7695365 0.3008602 0.09222586 0.084383679 0.086836044 0.160872823  
0.03690006 1.356005 0.09638932 0.9191908 0.8475764 3.583060025  
0.3931262 2.736568 0.2747597 0.1621082 0.3823673 0.366468102  
1.077765 2.438628 0.6229135 0.7301774 1.819074 2.304565 1.347139 1.48322534  
0.1398835 1.301798 0.407749332 0.07711979 2.133271 1.615086 1.610061  
1.187287 1.003921733 1.936262848 0.390176809 0.03949555 1.845726 0.2952143  
0.2898638 0.6647466 0.3173925 1.752867385 0.446059 0.129612291  
0.3885618 0.6202604 0.3097792 1.508265 0.4093871 1.560128662  
0.7802135 0.3167828 0.3743574 0.5307356 0.7857928 2.933742  
0.8989661 1.099450168 1.931922 0.114915293 0.1709599 0.2058966  
1.64932971 4.609291 0.3383606 0.2174912 1.151478126 0.1924561 1.66011  
1.378927 0.354087321 0.370526 0.08598371 0.1397217 0.401459 1.275766  
1.415139 0.9910954  
ST3GAL6-AS1 4.838188 1.12668518 0.1162458 0.496034593 0.186756606 0.951118992  
0.3672493 0.250404882 0.07574689 0.2690436 0.150439688 0.476937  
0.2857725 0.1406408 1.139057 0.5314693 0.6900436 0.169282624  
0.317489 0.3135293 0.059259122 0.2262155 0.038940946 1.958618 0.1550333  
0.231827864 0.1922188 0.9050257 0.4229158 0.06534927 1.675904  
0.130178067 0.3113566 0.218337241 0.2471079 0.029045575 0.200607775  
0.196149947 0.3880335 0.2927246 0.313481893 0.03531746 0.213899797  
2.169955 0.057218599 0.1410022 0.3732908 1.375575 0.436827423 1.178754  
1.223084 0.2697031 0.381174256 0.1147464 0.48887114 0 0.3609026  
0.1150321 0.2481798 0.5374756 0.8756986 0.4331287 0.179980927  
0.3165279 0.4790361 0.3533549 0.1371987 0.4710476 0.2436064  
0.3945809 0.09050123 0.435908639 0.2648178 0.3859282 0.121677428  
1.877001 2.108717104 0.07366021 0.1920968 2.349698 0.3327701 0.3280828  
0.1466904 0.146270983 0.140573299 0.31547 0.5907616 0.4772167  
1.949147524 0.6658511 0.04873928 0.1764257 0.362452717 0.3336012  
0.247588 0.606440968 0.07325803 0 0.62147641 0.2397016 0.391999571  
0.3111968 2.677537 0.273384919 0.5500338 0.1706628 0.834045714  
0.4918153 0.195007817 0.305154889 0.9098102 0.286396136 1.046452  
0.2548273 1.110419 0.3569277 0.6004209 0.631750624 0.7771988

0.2738304 0.1643736 0.1938243 0.5457004 0.3157848 0.3549135  
2.80435 0.6249897 0.3969545 0.1919299 0.221278814 0.395762024  
0.4758721 0.400599014 0.513118951 1.88415 0.077493601 0.08757465  
1.243338 0.985177559 0.02694075 0.175923643 0.204313524 2.153822 0.4241459  
0.1360014 0.2707797 0.1434371 0.164806 0.142408431 0.2852083  
0.1130273 0.22097236 0.3485845 0.8592103 0.246681717 0.3186356  
0.3332263 0.634645988 0 0.0265318 0.537513623 0.1278959 0.6928871  
0.1810195 0.244978959 0.2349385 0.4604973 1.276254115 0.2763485  
0.720298834 0.1072042 0.1952549 0.125365774 0.1927874 0.094710255  
0.3702002 0.7101877 0.3110927 0.3343157 1.016555 0.249232122  
0.3311409 0.5502742 0.4592749 0.2313615 1.943414 0.1792467  
0.6503092 0.2611271 0.591642003 1.689815642 0.3991828 0.2529094  
0.3601253 0.293491 0.660936851 0.2212371 1.295888973 0.2884337  
0.3459517 0.590084841 1.359039326 0.2789275 3.828829 0.550602679  
0.2305821 0.3877336 2.849608 0.8190425 0.3522629 1.736188 0.3026163  
0.4019415 0.4875304 0.4309627 0.1750266 0.05595576 0.3866932  
0.144623211 0.9552693 0.6533749 0.961979018 0.1779189 2.601913  
0.6923379 0.2156169 1.029295 0.060489198 0.2751088 0.1147515  
0.2188891 2.909018 0 0.262469391 0.2486757 0.1442847 0.2792378  
0.129194581 0.059120012 0.2097626 1.122234 0.4574052 0.512614227  
0.06560394 0.8381906 0.936897815 0.5182025 0.1127957 0.5206295  
0.5203579 0.1535985 0.2217411 0.258760853 0.63652 0.189613939  
0.3134043 0.2220672 0.1065805 0.6128005 0.4866946 0.4973531  
0.2962315 0.33500639 0.6206141 0.3802953 0.179211975 0.07020133  
0.3841511 0.2262167 0.8494051 0.8042229 0.2227958 0.155345  
3.782471 0.413912303 0.2622303 0.087869212 0.03070168 0.5151344  
0.1277644 0.471358829 0.172954082 3.70127 0.2232606 0.1016208 0  
0.515821 0.207279152 0.1572463 0.1864074 0.2625634 0.920223664  
0.7635459 0.418166 0.30363554 0.3290267 0.31358968 0.3429359  
0.2292329 0.340647093 0.08857484 1.08102 0.54890903 0.539895381  
2.746359 1.694313 0.2139052 0.3263885 0.3762081 0.3521541 0.9426921  
0.1044519 0.1978682 0.288537135 0.2386876 0.074032065 3.760925  
0.137624088 0.5115085 0.2220437 0.36342965 0.1180788 0.3408832  
0.2459666 0.554774756 0.1759963 0.2763441 0.159511558 0.538106766  
5.581415 1.080853 0.08383403 0.602343387 0.900744232 0.267920104 0.1248222  
0.1401213 0.6124508 0.1072442 0.5277861 0.904592 0.6803332  
1.114795 0.4262045 0.1547471 0.5230723 0.399652381 0.288503 0.3274754  
0.3261085 0.1146699 0.6055233 0.05767122 0.2630736 0.1247891  
0.04963342 0.1071884 0.28521666 0.1386831 0.2913368 0.3721186  
0.2668224 0.200203959 0.1447982 0.1796794 0.5569639 0.6426972  
0.5994752 0.2336899 0.6186888 0.039687779 1.778213 0.3291704  
0.416450868 0.1475072 0.2363772 0.6130135 0.5523712 0.3325434  
0.817973476 0.240509278 0.7472754 0.100782 1.328247 0.471547388 1.042255133  
0.54453807 0.1927798 0.458398 0.2587754 1.002536 0.4409207 0.1606237

2.413458 0.129046315 0.20183948 0.104353 0.682796989 0.5097007 0.068595463  
0.1908124 0.2071423 0.06735906 0.1781725 0.2787908 2.151705  
0.4789163 0.4029133 0.3249001 0.221225677 0.3050071 0.2701473  
1.003375 0.437139 0.163557681 0.3827976 1.788338 1.204785 0.133907613  
1.295009 0.1875683 1.319784 0.4725738 0.3323386 0.1797695 0.2967937  
0.09375107 0.438514498 0.328345516 0.2619866 1.038848997 0.141871539  
0.983125 0.5253804 0.742625796 0.1305616 0.4623747 0.3602808  
0.161486117 0.2714384 1.422866 0.4707616 0.716440265 0.3456967  
0.01936725 0.8629636 2.132889 0.117246 1.076016 0.6075296 0.2500528  
0.5609109 0.3358735 0.4420466 0.340505345 2.558488 0.1349011  
0.8499945 0.1706253 0.0478701 0.2626728 0.06374488 0.262460269  
0.234076188 0.229334419 0.4208271 0.9549305 0.4830138 0.7487799  
0.3543326 0.13844055 1.73759 0.3199851 0.406948 1.915992 0.6126619  
1.041329069 0.06876298 0.3466224 0.2009218 0.1358769 3.971412  
0.3295602 0.1777591 0.366135386 0.09064218 1.247808 0.664311485  
0.9061652 0.08293946 0.5531759 0.5864999 0.8451283 0.457969326  
0.356882821 0.202262474 1.310334 0.3588 0.4131949 0.3321571 0.3779438  
0.1809853 0.128281858 0.3993991 0.107502863 0.5595146 0.6660363  
2.816421 0.4661115 2.455698 0.193134321 0.457207 1.190566 1.246082 0.9721128  
0.3666101 0.4932366 1.487968 1.12359671 0.5990177 0.282960166  
0.4253921 0.1867846 1.64357418 0.1111347 0.6796815 1.014701  
0.170545989 0.1995334 0.2458797 0.06040709 0.917770814 0.8730716  
1.092034 3.830736 0.09459592 0.06725491 0.5546649 0.4514955  
LINC01355 0.2497301 2.289427699 0.3690119 0.987016813 1.243523181  
0.751378555 0.9446462 0.769535402 0.164211 0.1249837 0.238778791  
1.917551 0.2837315 1.627138 0.9860059 1.531799 0.6734966 0.492227685  
0.3065456 0.7994535 0.318109584 1.602592 1.74266456 1.764361 1.788507  
0.704506099 0.625064 0.06072849 0.1746353 1.123242 0.3845791 0.662334035  
1.306582 2.603322674 0.5327597 1.65514958 2.70821501 1.931260883  
1.451095 2.154602 1.084115282 1.955127 0.261966886 0.4046911 1.113439874  
1.561138 2.512244 2.142979 0.478908571 0.1398097 1.671715 4.407427 0.788151951  
1.070547 0.457649316 1.499647 0.2117768 3.206277 0.1175521 0.6263984  
0.1446415 1.377724 3.061047764 0.3958836 0.2047325 0.7295572  
0.2431387 1.278906 2.834975 0.3630095 0.4531212 2.413642821 0.1318078  
0.1019448 1.055133725 0.4152177 0.135672381 1.725193 0.2866439  
0.6686959 0.3349401 0.2216876 0.5309613 0.385049497 3.874648387  
0.360741 0.208369 1.527199 0.832214511 0.3260399 0.1358505 0.1937195  
1.615169377 0.4304828 1.37746 1.256006195 1.005831 2.035350842 0.180441064  
0.1521823 0.15015483 0.344734 1.460165 0.653145181 1.533103 0.5087204  
0.425440097 1.639762 2.242115272 1.170825424 0.2071817 2.037063536  
0.5023314 4.771605 10.11148 0.3463588 1.179618 1.756795321 3.017633  
1.265714 0.4123411 0.1828099 0.3661726 1.420518 1.393189 0.7444318  
1.163833 1.600733 4.212843 3.499913367 1.553974521 0.5923421 2.142189249  
2.383684473 0.1803604 1.44798017 1.352698 0.1272657 0.142604947

1.860604176 0.324629856 0.931877654 0.4087229 0.549313 1.231994 1.568184  
2.855719 1.020804 1.41376903 0.908129 1.922326 1.210441653 1.615191 0.618674  
0.362885843 2.643614 0.8227315 0.759086063 1.22041 0.7436262 0.462987171  
1.43159 2.571203 0.2497285 1.33647355 1.064117 1.494221 0.121399537  
0.1561922 0.728713787 2.343991 0.5820258 0.452965609 0.4396534  
3.560128732 2.341517 6.38838 0.19269 0.6402955 0.4158077 1.479415139  
0.7932848 0.2055056 3.859791 2.284914 0.3881644 0.08831531 1.88552  
2.161737 1.731826493 0.054513937 4.038463 0.4503729 2.591222 0.8862144  
1.132625289 2.201104 2.632935299 0.8367014 2.361968 0.470480279 0.818767989  
0.5814273 0.3577224 0.98220074 0.9890421 0.4517318 1.694068  
0.8806186 0.8841272 0.6942767 0.7523625 0.2534073 0.1287835  
3.638775 2.702532 0.242612 0.2604745 1.186925138 0.7090096 0.7542113  
0.386591468 0.5969302 0.4572968 1.322233 1.246491 0.4908066 2.510279478  
2.441332 0.4873836 0.9641198 0.003986368 1.042101 0.206342508 0.2079393  
2.198491 0.2297115 2.080592827 0.247176819 1.466003 0.2493325 1.062434  
1.06498807 1.503492 1.062382 0.783421424 1.043163 1.334428 0.170196 0.5640396  
0.2586579 0.8240751 2.160384569 0.8457489 0.155197029 0.5610121  
4.225776 2.500344 0.2786184 1.582652 0.5096568 0.8409731 2.487431676  
1.796108 1.791192 0.080477501 1.081628 0.08007671 0.7897563 0.674322  
0.9755118 1.406825 0.5567031 2.378601 1.749390858 0.2504049 0.293900241  
1.901654 1.199183 0.7254219 1.922060003 1.626039777 4.613772 2.001321  
1.557856 0.1880225 0.4221941 0.437322268 0.3253977 9.056413 0.2991251  
1.104344462 0.1639162 0.09065383 0.472652357 0.1078932 0.465358675  
0.2149424 1.967102 1.32927454 0.9683325 0.8322609 0.38249199  
1.668068182 0.1566791 0.2518688 1.273733 1.714508 1.917139 1.678976  
1.414521 1.161854 0.5898154 1.423370618 0.0873615 0.212080653 0.4324235  
0.261820907 1.305328 0.1594136 0.744998357 1.727879 0.1800919 0.5522727  
0.586405406 0.2520895 0.1772799 0.17564633 1.490055939 0.1421129  
0.5242603 0.6398098 2.53501323 1.157436658 3.224691639 0.1884542  
0.1771979 0.3935761 0.1328535 0.2281555 0.3321145 0.3602262  
0.1755511 1.127034 0.2324361 0.4258897 0.357034163 0.6428165  
0.7934523 0.5828276 0.1065394 10.40009 1.062712 0.3851478 0.5024112  
1.283513 0.7269949 2.006381101 4.303588 0.3969973 1.589853 0.3443107  
2.841800314 1.112127 8.02353 0.9415136 0.1354595 2.48896 0.0844357  
0.1618016 0.99559169 0.2452743 0.2305868 0.28275138 0.2436416  
0.9223921 2.681624 0.5242427 0.9385977 0.267143111 1.544140115  
0.8337423 1.697156 1.303252 0.093301824 1.322717255 0.834781663 0.8865993  
0.3697013 0.5825737 1.010725 1.282077 0.152344 0.2121983 2.181449248  
2.969198152 0.2585439 1.208350712 8.768771 0.531098229 2.137246 2.630221  
0.3024848 4.520145 1.561649 0.3763815 1.662418 0.1039848 0.6230772  
1.39767164 3.925351 1.784838 0.4689933 1.244757 1.506944886 0.3766892  
0.3812709 1.359224 0.832012348 0.8932757 0.3775829 0.1873371  
0.2228595 1.224264 0.3300696 0.7604012 2.202999453 3.321376443  
3.097252974 0.3245477 0.387389469 0.131812315 1.405258 1.37875 1.627058907

1.25164 0.2370155 0.3852115 1.618247006 0.2914224 0.2774524  
0.1792055 0.336646512 0.263831 0.6057993 0.1729321 0.5736383  
0.5809748 1.679713 0.5873367 0.5880678 2.132815 0.8870562 1.280027  
0.124063623 0.6003468 4.148625 0.7283035 0.743097 0.3805163 0.3253977  
0.1678045 0.144504209 0.295548805 0.342209355 0.07405092 2.480937  
0.1599052 1.907873 1.033716 1.679265562 0.5082334 3.59399 0.1344334  
0.3695614 0.5748025 0.113310218 0.3540428 2.172229 0.8089281  
1.027977 0.8957791 2.538852 1.419549 0.941150875 0.2722962 0.7807755  
0.430176187 0.127938 1.228659 1.842825 1.828026 0.7766707 1.763236202  
1.930753928 0.568238237 0.06340763 1.886724 0.4526203 0.1445059  
1.321962 0.2802545 0.844235541 0.4589676 0.183114264 0.2321965  
0.7575111 0.5164591 1.217697 0.516407 2.459828464 0.8550246 0.5340036  
0.7370248 0.4260313 0.5140779 1.671816 0.7798525 1.056537337  
1.521803 0.424325353 0.2552529 0.08677044 1.745554238 3.190574 0.8046398  
0.4364607 0.890701519 0.2139066 1.837951 1.711782 0.827432315 0.4785888  
0.386516 0.1146496 0.09374796 0.6283343 2.091825 0.3543906  
AL136295.7 2.450317 3.117526397 1.143277 2.718021551 2.548960871 1.902560396  
2.135606 2.097381663 0.9578195 0.6772611 2.2193615 1.842765 1.511569  
2.540575 2.400563 4.793425 1.983091 1.730961857 1.403815 0.9544353 1.928835035  
2.476447 4.076046175 4.666195 2.559406 2.015381046 2.115528 0.741744 2.107983  
2.371906 1.617046 1.920451934 2.231026 4.004972137 2.28342 3.274924835  
3.279754747 2.882219141 2.412453 4.70228 1.749533736 3.833225 0.860606387  
2.737232 1.8624177 2.410315 2.824089 5.007406 1.583455725 1.180447 2.417262  
3.726173 2.646246215 2.76087 2.076202398 3.877584 1.734707 4.22906 0.7896861  
2.742398 3.137409 5.705117 2.929114592 2.069667 1.33263 2.134794 1.167294  
2.327407 2.843448 1.04355 1.758967 4.9645701 0.7574261 0.8771354  
2.075903826 1.078849 0.886737817 2.160408 1.987416 5.353501 2.174071 0.9847703  
2.66642 0.778004912 5.905414007 1.380849 1.037525 3.911189 2.220088491  
1.656125 1.152725 1.836552 2.814999091 2.148253 1.565375 2.236630096 0.9949662  
3.677832974 1.296118184 0.9429859 0.840632765 1.378961 1.079513 1.070009046  
2.408552 0.7343301 1.344162791 3.627753 2.688487458 1.929341787 0.8772533  
4.801813079 1.970155 5.700976 6.825605 1.671611 2.148522 2.607353278 4.367857  
4.914948 1.570426 1.633939 1.324316 2.68425 3.303579 1.447388 1.531065 3.532233  
5.460646 4.796692457 2.819945764 2.62297 4.634062633 1.746873998 1.877127  
2.921573322 2.891496 0.8290327 1.083266977 4.069063461 0.937196556  
2.009423507 0.9642047 1.530444 1.95859 2.225606 5.614025 2.445772 2.756710764  
1.302332 2.924628 1.823988721 4.29483 1.901325 1.572023289 4.076272 1.755686  
1.906345243 2.768297 2.329823 0.873207678 2.092149 3.2682 1.757206 2.197555483  
2.860768 3.705538 0.960609124 1.31041 2.057773718 2.304515 1.577416 1.306363601  
1.945312 5.805087491 3.180803 5.102456 1.992594 2.088989 0.808449 1.809217511  
1.436811 1.171073 5.484891 3.846577 1.642255 0.7326302 2.599274 4.007497  
2.547400527 1.071683427 5.234617 1.761883 3.238247 1.958685 2.558853739 2.97239  
2.821121813 3.066386 3.336154 1.569939551 2.640411678 1.567572 0.6160885  
2.460037709 2.802322 1.880739 2.967777 3.528258 1.814741 2.479553 2.586487

1.068949 1.118129 2.97971 3.706251 1.008929 1.222434 2.158953374 4.142163  
2.190662 0.90105368 1.708169 2.010629 3.080327 1.800821 1.9856 4.745125512  
4.623467 1.370419 4.647258 0.5425447 1.226423 1.631095842 1.484905 2.006928  
1.189248 3.384021358 0.789104366 2.387204 1.405354 1.746343 2.17567361  
2.626946 4.514355 1.987675559 2.608934 3.169558 0.9888586 2.087181 1.052054  
1.298109 4.408152854 2.091533 0.894368319 1.699685 5.044072 3.42543 1.218202  
2.826398 2.02441 2.375838 1.223778343 2.495618 4.652992 1.498167311 2.083619  
1.214398 1.603619 1.80693 1.898916 0.2782472 1.403098 4.054392 3.865575693  
1.381626 1.592585538 2.156793 3.039808 2.782389 3.145730988 3.905364947  
5.806984 3.589906 2.298713 3.760934 1.423574 1.03749693 1.998422 3.502944  
0.5797026 3.898944529 1.414122 0.558147 1.560486916 0.6798273 0.789396689  
1.204562 3.556214 2.393045832 3.857877 2.021545 2.89206445 3.106455185  
1.116973 1.67826 2.800456 2.416342 1.789938 3.841028 4.06672 2.812801 1.720155  
2.504759956 1.067042 1.105159925 2.831897 1.091113261 2.845931 1.715843  
2.698984334 1.327206 1.042401 1.848869 2.067259585 0.8345525 0.9706585  
0.958708772 2.112464722 1.618376 1.473934 1.068495 3.037585432 2.786420677  
4.089374159 0.8987978 2.444475 1.032592 0.7628077 2.08558 0.9839627  
1.387551 1.234446 2.648615 0.9349044 1.932119 1.684534786 2.488378 0.987868  
2.768186 1.194908 8.401257 1.823131 1.142457 1.753286 2.731286 1.762017 4.093164664  
5.358368 1.391716 2.899312 0.803326 3.547336087 2.420953 6.689915 2.162838  
0.8528235 4.46136 1.450143 1.014134 2.202572488 1.049743 1.354419 1.226487851  
1.847958 2.225137 2.353151 0.8511862 2.72901 1.305969016 1.663584175  
1.803712 3.398369 3.571202 0.60731374 3.16749265 2.142212769 1.692847  
2.106578 2.447169 4.420491 2.822138 0.9732293 1.695454 4.714061869 4.206502959  
1.209582 3.443308637 3.75968 1.301084442 2.02558 2.000866 1.78632 5.736783  
2.980334 1.73551 3.154113 2.226633 1.141212 2.377788878 4.499617 1.929415  
1.553327 1.723117 3.734226312 1.630841 1.110649 3.227334 3.539387439 2.268452  
1.976501 1.641825 1.222301 2.518995 1.082469 4.530083 2.980170721 5.705740925  
5.785790017 1.11742 1.57873246 0.840031517 1.894847 1.010113 2.852670593  
2.092873 1.400079 1.241382 2.479561654 2.135678 1.258709 1.460636 1.162794903  
1.561191 2.462594 0.6537796 1.514127 1.235479 1.491372 1.384182 1.251592 6.91759  
2.477487 2.846596 0.689473249 1.565779 3.658045 1.924057 3.820675 0.9864432  
1.580018 1.74645 1.096026791 0.847490845 1.669658812 1.410966 2.795161  
1.439173 3.897314 2.758018 2.269271349 1.235727 5.829542 1.229288 1.015392  
0.5949578 1.166499638 3.779944 8.622843 2.308771 1.540893 2.53513 4.60717  
5.655087 1.834765441 1.362669 2.110959 1.315185761 1.404223 1.650841 2.657225  
2.123468 1.871454 3.041748994 2.72647323 1.725371141 0.3308082 2.636096  
2.064138 0.8666927 2.202134 1.525706 1.922517452 1.919743 1.793618086  
0.8490075 2.839611 1.64878 1.774531 1.032947 2.425223886 3.730721 1.124777  
1.693343 2.229119 0.8870946 4.446734 3.066973 2.001915515 3.458531 1.705319009  
0.5478696 1.180946 2.997323146 6.932803 2.125539 1.683065 2.766488508  
1.649719 3.690151 3.097826 1.647653547 0.8586659 1.393402 0.723655 0.6512456  
2.283584 1.822566 1.498381  
AC108449.2 1.661038 1.369492335 2.603736 4.507309986 0.488931113 3.175857805

0.9659146 3.000461847 1.850859 1.061431 0.746679594 2.393202 4.235883  
6.443489 2.138777 2.068388 2.586641 1.522419158 4.506354 4.053956 6.455594267  
1.957666 0.713635163 4.889881 2.486009 2.743821363 7.485563 1.704629 3.659907  
1.031264 5.858861 1.817641582 2.567677 1.333755753 5.196188 7.806945292  
1.587517159 3.145328355 3.34816 2.384221 3.218205869 4.854231 1.603614385  
2.660795 2.097186025 5.168036 0.7893415 0.5092709 2.668445778 2.221476  
5.827728 0.6864726 2.4996891 1.48952 1.968286026 4.827822 0.9282711  
2.108088 2.184902 1.425632 2.986735 1.378048 0.458103627 3.197832 2.926286 3.70549  
3.911157 3.932565 6.066939 2.977521 3.869911 6.878985794 3.553143 2.045494  
1.46003466 4.318374 0.430895615 1.771748 5.867303 1.503248 2.642629 2.049707  
3.248316 2.265723903 2.318542652 1.111795 0.4761588 0.8637546 3.034487003  
5.551563 0.9428225 2.988255 2.952151112 4.415381 4.591335 0.260477107  
5.370132 1.445956535 2.105821306 3.038347 1.323334937 0.8773875 2.31121 0  
3.863988 0.9122113 3.558959452 5.022898 9.083230959 2.071220383 3.814145  
1.924457513 2.620906 0.4191013 0.4710562 1.344557 2.12044 4.019971134  
0.3956392 1.400925 0.8032867 1.695292 1.86879 3.785727 0.8401227  
4.195328 1.982357 5.986408 2.198328 2.365518623 4.338710185 2.683346 0.85649811  
2.381004932 3.688336 9.428247691 2.440786 5.760748 0.78497607 0.822864198  
3.223991973 3.233685486 5.062881 1.825462 3.686635 0.7443498 2.284414  
5.505661 2.464800999 4.028955 5.667438 3.374632231 2.129397 7.063814 3.175261009  
3.688007 5.993647 0.668423998 3.790889 0.850892 1.539143967 5.720067 1.738404  
1.859743 6.446469724 3.677618 1.886014 1.475718364 1.456011 6.893468619  
1.211524 1.416394 2.425100968 1.124149 4.447650189 0.913274 3.130493 1.117865  
1.666032 0.4393744 0.634367991 4.789369 0.9392309 4.431526 5.339197  
5.290659 1.368704 4.417739 4.049216 6.441367466 1.792112754 2.133676 3.83018  
1.356602 0.9337745 7.69360828 0.7179685 4.023339003 1.996881 0.2401493  
1.438024748 4.118549289 1.474514 0.2613313 3.027117771 0.5986362  
0.6485306 1.278165 4.177268 2.622588 6.380987 2.336413 1.929194 0.5036619  
3.325414 2.59659 1.452721 2.775575 6.874416753 3.219558 1.859568 1.469109261  
0.3622841 3.794763 3.524401 0.841505 3.268579 1.231700328 1.422009 3.680154  
1.374269 0.1965742 1.763091 0.524170686 0.9114506 0.6169738 1.439251  
3.382330192 2.708596222 5.403136 7.99795 1.974127 8.122079895 3.206036  
1.114129 2.661298977 2.934721 3.686334 1.973006 2.999265 4.105005 2.558592  
4.577418547 3.355232 1.034190934 2.833447 4.107305 4.313324 1.971265 0.941472  
2.122257 1.58339 1.176709945 3.889189 1.790729 0.547375707 2.036983 2.527175  
3.548942 5.207027 0.6140941 3.893949 1.253977 3.38996 1.598881828 1.168041  
7.031638203 1.547264 8.732368 2.634099 3.749202646 1.13198984 34.00911  
1.060757 7.697553 0 4.979695 2.374134851 5.042991 35.15754 4.324856 1.36142465  
1.934612 3.352714 2.050061009 2.630636 5.866598242 0.5486619 6.243067  
4.473955251 1.082153 4.534177 15.5081717 3.926257817 2.593762 2.716886  
3.266704 6.594904 2.272026 3.170193 3.528168 1.302715 0.6421306 2.455029864  
1.524346 2.345991656 1.8916 2.97248797 3.968305 2.836103 0.792886115  
0.3305993 1.500518 0.4507605 0.81040112 2.754964 2.502008 1.569878847  
5.655797998 2.088043 1.383634 3.01783 1.21555982 3.571715402 2.120195807



2.144534 2.353886 2.431829 1.535442 2.720322 5.503596 1.541723 0.8368148  
5.207107 3.875741 4.148723 6.432030817 2.961772 0.7060403 9.545468 3.093803  
32.44294 3.346811 4.912419 4.383216 5.457518 1.375041 4.978005064 3.219257  
1.245782 5.295428 2.406097 1.69859035 0.1769056 1.406309 5.74142 1.690379  
3.490355 2.349493 4.8922 3.27294756 1.437692 3.949789 4.133953865 2.553051  
3.176704 3.076014 2.258582 3.531877 5.133026044 0.706345183 2.136129 6.772113  
4.167571 2.080389624 4.567500872 0.748443902 1.324837 3.996139 4.347145  
0.3257547 4.63872 3.710168 2.530062 2.561990146 1.181601955 0.8765084  
3.76134731 32.77071 1.152329216 3.334954 2.886624 10.59551 3.809405 2.887777  
3.853984 2.773181 1.025531 2.862571 2.770370674 3.985168 4.26314 1.560705  
1.780233 5.786593728 5.035091 1.860317 7.683166 0.971376013 1.823597 0.9374709  
1.301703 2.361935 7.105543 3.90238 0.5356657 1.682296708 0.727921633  
2.966857513 2.429173 5.245173473 4.549912785 3.464776 6.925524 2.509539347  
4.549724 1.850539 0.9432195 2.924177569 0.8290674 2.535124 2.636095  
0.641385897 0.6033589 1.035201 2.997566 1.577216 4.225697 3.242113 3.159546  
1.7423 2.379468 6.354723 4.433039 3.456542905 3.883285 0.7828662 4.269272  
1.726307 2.412497 1.980663 0.8274709 1.670093648 3.272271595 4.61671487  
4.966134 3.969939 3.077764 0.4158244 9.134231 4.686538656 8.779819 1.759223  
2.75523 2.104705 0.6329338 2.901205805 3.307911 0.9030134 3.265682  
1.689705 4.015663 4.20252 0.9307509 4.883264381 2.131766 3.927909 1.598636269  
4.599339 3.757668 5.571086 3.789446 1.739582 5.976680715 7.187479403 0.397144252  
0.500277 5.502332 4.767711 2.101512 3.021738 1.633249 4.701808986 1.284109  
0.738790058 0.3759695 1.367896 4.150247 2.342161 0.6481963 5.567175536  
0.9667863 2.978088 2.807681 3.557403 0 0.9624965 4.819457 2.412246024  
4.088031 3.047649336 1.163952 0 4.411556651 5.057715 0.7031557 2.884024  
2.651889018 2.367457 4.403603 9.440468 1.713061344 3.199997 1.429479 0.7620009  
2.658145 2.533512 2.787133 3.019587  
AC003102.1 0.369284 1.522170101 0.2678794 0.758585308 1.117834554 0.5808726  
0.5812956 0.766695022 0.1745529 0.1127255 0.244249526 2.562105  
0.3310313 1.759378 1.118797 1.565931 0.5431927 0.354635319 0.258222  
0.3853356 0.248287474 1.145272 1.990517166 1.470005 0.660394 0.570654312  
0.4899333 0.1769568 1.020985 0.967442 1.192861 0.342840447 1.050155  
1.321381611 0.3106044 1.283902455 2.483350583 1.239610143 1.048645  
1.929655 0.96319337 2.005065 0.130357874 4.472906 0.934978064 0.817245  
2.779173 1.327344 0.183024611 0.273211 1.284554 2.840113 1.230681107 0.6971185  
0.353797625 1.723994 0.2705919 1.74312 0.07951707 2.074162 0.195683  
1.693766 1.608736078 0.2958464 0.1445108 0.6316834 0.1660659  
1.078914 1.476056 0.2139486 0.2654313 3.038459692 0.0871789 0.07609344  
0.859396509 0.2961906 0.628421374 1.01075 0.2634083 1.636383 0.2788521  
0.2499311 1.121668 0.26265217 1.130846516 0.3456952 0.2956499 3.36948  
0.808736894 0.3393028 0.1701757 0.1478399 1.282395662 0.5823927  
0.7261516 0.547882266 0.01023137 2.846933016 0.292938713 0.1305611  
0.146953695 0.2005956 0.5560477 0.785447839 1.651605 0.2323924  
0.308341365 0.7276627 1.807735549 0.703206085 0.1270659 1.95993459

0.2981451 2.702079 1.731764 0.3888241 0.503136 1.180097292 1.302542  
2.191365 0.2892551 0.5315542 0.3394971 0.7475483 1.472168 0.7553467  
0.6244402 0.6306239 2.714039 2.648935529 1.320628144 0.2990757  
2.99883803 1.422239552 0.1650632 1.439447483 0.8622751 0.3973282  
0.152547537 2.065667243 0.165846506 1.097294342 1.81369 0.4362003  
0.7906347 1.055112 1.71709 0.8372483 0.795562011 0.5526797 1.318099  
1.249888637 1.595338 0.6239951 0.118121379 1.405304 0.3878255 0.935262048  
0.3120135 0.833734 0.267437739 1.125319 1.036822 0.2344289 1.2080265  
0.7628787 1.604926 0.30556155 0.1215755 0.895325722 1.311579 0.2454273  
0.446475374 0.4038762 1.458323744 1.419842 4.132009 0.2530197 0.3612425  
0.2732332 0.730973534 0.2285186 0.2509005 3.752381 1.561767 1.475115  
0.122894 1.644218 1.253991 1.055530615 0.354004619 4.655182 0.326727 3.289347  
0.2049477 1.046154851 0.7879098 1.605011987 0.9748542 1.910691  
0.257758074 1.379060586 0.3326207 0.1971674 0.544439869 0.5796641  
0.2552864 0.5343535 1.256122 0.7195172 0.8313582 1.105908 0.2044953  
0.1201579 1.187943 2.440965 0.1015936 0.17012 0.719566965 0.8556953  
0.6346138 0.489424926 0.4721217 0.823075 1.73081 0.481816 0.2806614  
0.88704462 2.589068 0.309081 0.8457836 0.2157235 0.3775305 0.236860663  
0.1562875 0.9551616 0.2778673 1.028483902 0.1981637 0.8788762  
0.2930234 1.549836 0.903858372 1.337707 1.502314 0.934262207 0.7780121  
1.228755 0.1454243 0.9705527 0.2091559 0.5161467 1.852127104  
0.731255 0.079445602 0.1890893 2.791292 1.038246 0.2676806 1.658535  
0.2328998 0.5274967 1.059740765 1.533272 1.434046 0.12764845 1.088295  
0.1919066 0.4135926 0.5413521 0.6551965 0.09334835 0.1952622  
2.380924 1.030339586 0.2288976 0.360796576 0.6431788 0.8345587  
0.8029724 0.946319618 1.718464098 2.843098 0.7067699 1.311393 1.248737  
0.4862741 0.249685355 0.1437469 1.405838 0.1650156 2.19287767  
0.5089559 0.07884257 0.415135899 0.2027318 0.273728566 0.2189491  
1.160549 1.208416782 1.625489 0.6698294 9.31440241 1.508057675 0.06056243  
0.3762436 0.912528 0.7679165 0.8812724 3.013079 0.8900842 0.9409233  
0.321253 0.958509136 0.1636475 0.217128836 1.113422 0.280075377 0.788679  
0.2029816 0.725104598 0.3628048 0.2268402 0.1339736 0.576054149  
0.1935675 0.1984874 0.185647564 0.915099294 0.6434895 0.6060367  
0.3913961 2.460641592 1.549323434 2.173661036 0.2091951 0.1859115  
0.1411346 0.2078189 0.3501305 0.1772796 0.2942453 0.4116668  
0.714295 0.1880269 0.2545084 0.373539599 0.6984104 0.427765 0.9962963  
0.4163908 2.071931 0.1449806 0.3106318 0.4108098 0.29114 0.7544955  
0.83651268 1.185368 0.3906115 0.9496491 0.2768254 2.917252946  
0.5702832 4.187627 1.289963 0.1720408 2.268395 0.122391 0.2649825  
0.424029985 0.1878268 0.2692681 0.161065032 0.3090174 0.7725023  
1.40347 0.2612985 0.6143233 0.218094229 1.023203487 1.115913 1.161222  
1.790972 0.175619372 0.73098175 0.536161602 0.6461764 0.360117 0.792324  
0.6345416 2.01161 0.2523717 0.2228079 2.153732961 2.353807472  
0.142098 1.001288527 2.733536 0.474218982 0.7284127 1.931072 0.2892807

1.443268 0.853217 0.6844984 2.432994 0.1688151 0.4083859 1.306935765  
3.294238 0.2641053 0.4437558 0.4782385 1.644681416 0.2586885  
0.4995259 1.347951 0.554041084 0.3523316 0.2071879 0.2649653  
0.2070019 1.121291 0.1829222 1.119172 1.070390723 2.54028731 1.948939525  
0.12545 0.461912044 0.14435963 0.3696679 0.1621989 1.59547063  
1.377534 0.3807768 0.3665992 1.333877162 0.1364747 0.1876803  
0.205461 0.227721621 0.7242106 0.4787619 0.2126881 0.9783126  
0.05894931 1.949559 0.4471762 0.5172951 2.515519 2.189076 1.89533  
0.260157472 0.4340496 1.684346 0.6964434 0.6344706 0.3142249  
0.1994769 0.2203428 0.152732222 0.1508841 0.340675388 0.1442624  
0.8113192 0.1535267 0.7985813 1.068915 1.624130588 0.1258317  
1.930598 0.1477715 0.2253401 0.5133936 0.188671303 1.411726 2.827713  
0.4209173 0.6669006 1.398036 2.105738 1.340614 0.68521182 0.2126757  
1.536433 0.506067759 0.1730851 0.776094 1.309204 1.776855 0.7466828  
0.846028595 1.205577043 0.266341937 0.360289 1.710029 0.160299 0.2253215  
0.7638213 0.3515769 0.895805224 0.590103 0.281513773 0.2625603  
0.6447247 2.00814 0.6803799 0.3937779 1.355419931 0.7957247  
0.1892116 0.6761505 0.3304524 0.5290822 2.422506 0.7262026  
0.805087296 1.474508 0.25583217 0.1633806 0.2459605 0.890355987  
3.464353 0.6062996 0.2243824 0.454722521 0.2057888 1.161318 1.55233  
0.375988017 0.3219083 0.24278 0.3371902 0.1823181 0.4602549  
1.326911 0.9458516

BNC2-AS1 0 0.452887472 1.602725 0.244250679 2.627433554 0.952550265  
3.094305 0.15175508 1.71572 1.14815 2.074169627 1.341982 1.191949 0.4353011  
1.250485 3.646902 3.747898 2.519199678 0.7724722 0.8233806 0.466873269  
1.4852 6.289326721 2.482376 6.921439 1.198612347 0.8833979 1.604306  
0.555324 0 0.03976994 1.501783889 1.165187 1.194563175 0.3369533  
0.572089237 2.729936048 2.575613784 3.668549 2.536856 1.372093643 1.391244  
2.029912706 0 4.996333372 3.286372 3.902445 22.57807 0.240908282 1.827725  
0.9314868 2.656072 3.930505893 2.316577 0.568982457 0.5930035 0.6734303  
3.851694 2.300336 1.56008 3.852051 1.244107 3.485868909 1.198926 2.792825  
3.247893 3.302812 2.721511 0.4429047 0.7771768 0 1.378926799 2.906013  
4.516092 1.129821214 0.504135 4.211882761 0.5440616 1.272661 0.3127045  
1.245322 0.8224369 0.108347 1.028925558 1.66126109 3.202384 3.32913  
1.392502 1.52818224 1.630486 0.09599816 2.811532 1.507114528 1.56054  
1.044977 1.791693001 1.106231 6.143129248 1.109319056 2.077339 2.478823655  
0.8486879 0.825456 3.153872816 0.2166722 1.176497 0.628113454 2.482274  
1.392335311 0.367302867 3.513698 1.052974204 1.195449 8.455328 5.467774  
3.608806 1.736951 2.488625121 17.34897 1.510162 1.392145 2.082335 1.042255  
0.901868 5.697233 0.05636247 0.9153561 1.498549 1.512121 2.677281615  
0.863021443 3.244466 12.72968887 1.51597877 0.3711072 2.187745739  
0.6899573 1.452744 0.337466348 8.49011285 0.259877858 0.841426277 0  
2.506227 2.343879 4.586679 4.722077 1.014394 2.462090937 1.8257 1.298626  
2.012952357 7.974905 0.7051346 0.589985928 1.948842 0.2552399 6.293180709

1.40564 6.218668 1.819642167 1.367496 2.095833 0.03241279 1.596017663  
2.815008 4.040306 0.897765536 0.5715184 0.331034534 5.152114 0.9133756  
2.057697575 14.15317 0.186543796 2.916624 3.910294 4.505414 1.524894 3.475575  
5.440743044 1.534644 3.506523 1.562491 1.215188 0 0.1925722 1.369202  
0.9495188 3.270396152 0.323585219 11.13841 1.452899 7.471422 3.9983  
0.491790551 0.6536316 1.935349027 7.53688 2.663637 3.832940729 0.334599928  
0.7606839 1.432437 1.474894764 1.72581 3.745719 3.571694 0.6391955  
0.1445471 3.983318 0.9934017 1.074415 0.02824272 3.30599 1.969926  
0.9919073 1.67561 0.996987814 0.551481 1.579382 0.360902676 1.86898  
0.1024959 1.136372 0.8493696 1.834247 4.368507237 3.001079 2.486192  
4.167586 0.05070511 2.329354 2.783666207 6.367377 9.093979 1.821856 1.672198759  
0.349332971 1.404723 0.8328973 1.880175 0.715174696 2.196659 3.424135  
2.878727986 2.679246 6.353927 0.6076714 1.22328 0.6806963 1.601406  
0.849436912 1.941223 2.027400844 2.765456 3.790708 1.469466 0.9758626  
1.725492 1.15247 6.175008 2.540373806 2.023246 3.932458 0.176490298 1.175298  
0.2619118 0.6480906 0.3770164 4.400051 0.1462748 1.005335 3.567632  
3.356922072 5.164957 0.4845946 2.17695 3.449716 2.684246 2.437051798  
3.357883879 1.458024 5.130299 1.60124 21.30677 1.124829 1.684082572 0.3660285  
3.029011 0.8496066 2.322261281 1.230464 1.111901 2.171860361 0.4574539  
0.205884813 2.540999 2.408017 1.431354516 3.244943 0.6297649 3.24343677  
2.025508706 3.4164 2.636359 1.876759 0.3461572 2.795551 2.263365 2.458234  
3.223121 2.387074 0.933652623 1.709547 1.749785917 0 0.464688009 0.6044883  
0.954203 1.602074561 3.992471 1.540299 2.616096 3.895709039 0.649963 0.1943909  
1.326529918 1.683321618 0 14.24469 0 6.143812074 0.59137647 5.660808087  
2.274141 0.6439688 0.2412598 0.4224618 1.082856 0.4023212 0.08645175  
1.711924 1.291482 1.645887 1.262896 1.453229147 1.073348 3.718259 0.7226008  
1.279856 7.553478 2.385406 0.3532886 0.6320258 1.727081 1.773417 3.12986253  
2.895431 4.705362 1.099402 0.5755919 6.528301828 8.555949 1.990695 0.09141756  
2.285605 2.43528 0.1150704 0.3249562 2.97046331 3.060934 0.5865957  
2.019083147 1.743205 0.6518046 1.121164 1.474017 0.6847583 3.222203926  
5.866757861 3.207885 1.439146 3.496127 1.238362767 1.42807164 2.359580152  
9.454632 2.934337 0.8233466 4.243335 0.1447415 0.870014 1.853102 1.059054158  
4.571805694 2.877509 1.921221167 3.915287 0.810644512 0.3758291 1.886967  
0.729697 2.105599 2.17258 0.02616083 2.043787 2.909825 1.230638 3.267989113  
2.2695 0.7537931 2.122664 2.630835 3.382548636 0.9971838 0.1020973  
0.6779931 1.384676677 2.1863 0.738879 2.382857 2.538528 0.8957448  
0.075874 3.985722 5.724291363 4.69407408 2.101833241 1.474331 0.668128708  
0.878220816 0 0 3.79678329 5.750979 0.9107053 1.453028 0.72701093  
0.7841273 0.3113904 1.50674 2.968216868 1.556328 4.653842 0.966505  
0.7517569 0.5542337 0.3436781 1.84342 0.3693829 6.546873 1.911131  
2.524933 0.355059655 0.1545787 1.169101 1.190522 0.8401703 1.760009  
4.526962 1.75775 0.086158102 0.673831471 1.43723705 0.678168 1.515134  
0.0984162 11.53038 1.479554 0.999812477 0.9717934 2.983188 0.1335892  
0.331034 1.810072 0.332599295 4.266277 4.297098 1.837368 0.7264154 0.3214601

0.9087547 0.2500849 1.057686428 0.8212435 1.053306 2.299691714  
0.6561789 2.831569 0.3533675 2.754673 4.595707 3.198100577 1.933045796  
2.617935321 0.04032607 1.678417 1.989386 0.6230717 0.5692532 0.4860999  
2.484561836 2.567018 0.370545793 1.27836 1.628494 0.04866049 1.836131  
1.910838 4.945231373 1.246883 0.5255967 0.7644588 0.07225279 17.4905  
6.962358 0.676325 3.592222233 3.023342 0.175997604 0.9076854 5.623551  
2.714038559 4.815663 3.972971 1.276872 0.885585769 3.930062 1.849111 0.4759175  
4.539248699 0.2407474 3.072712 0.06340435 1.229703 0.1766227 1.691586  
0.5826299  
DM1-AS 0.4771796 0.226487834 0.4929975 1.750804085 1.686264853 0.860108678  
0.7201353 0.42689428 0.03108794 0.220841 0.216101412 0.4613962  
0.5381375 1.038989 1.364152 1.660564 0.7723822 0.663888981 0.168628  
0.3602992 1.005270128 0.5725322 1.981779441 0.9925844 0.3393523  
0.475732447 0.5916763 0.04952526 0.9587816 1.466191 0.3314807  
0.412155096 0.5622609 1.115142753 0.6553145 1.120559599 1.197573545  
0.885539656 0.6210992 1.265471 0.614703296 0.6667675 0.654423181  
1.521154 0.469671651 1.099529 1.390635 0.8553965 0.401591996 0.6793542  
0.8165483 4.088195 1.343552467 0.8476931 0.656646072 0.7002099  
0.7951767 1.30618 0.2037152 0.9288001 0.1916816 1.036957 1.871310941  
0.5995799 0.5347666 0.8894773 0.5255498 0.6444225 0.7844632  
0.01905216 0.4209585 1.702308706 0.9160691 0.652203 1.28413777  
0.3001388 0.219411614 0.9522931 0.329695 1.146806 0.2185201 0.1713744  
0.6773006 0.325889879 1.223110892 0.3187072 0.8216687 0.8559749  
0.730066591 0.6647296 0.8668189 1.290186 1.570216694 1.038281 0.5661394  
0.808907811 0.08017724 1.691518201 0.302890325 0.8460508 0.186286682  
0.2947407 0.4777874 0.961733844 0.6772325 0.2801729 0.463122526  
0.4920098 0.600261404 0.26439824 0.8346658 1.0500448 0.4810213  
3.845542 2.253364 0.4687673 0.4158404 0.5833851 1.323163 1.573392  
0.1214316 0.3471234 0.420784 0.4017723 1.296402 0.2348893 0.6577115  
0.7602818 0.7877163 2.101763978 0.846946696 0.5408496 1.074167056  
0.599381814 0.9560682 1.187380039 0.8805857 0.4151506 0.052739385  
1.636434118 0.192539605 0.57935553 0.5026488 0.3798053 1.102396  
0.9557441 2.38841 1.521888 0.636423787 0.5413786 1.237027 0.657511109  
1.870858 0.4701813 0.491750686 1.101255 0.3950911 0.377233252 0.3565724  
0.827575 0.758331887 0.5998959 1.604681 1.148177 0.309365983 1.108866  
1.408884 0.224485092 0.3289139 0.216791012 1.566351 0.7212265 1.097652424  
1.237205 1.554834369 2.033619 2.543776 0.6308808 0.2455326 0.4565729  
1.807114894 0.7994495 0.5579646 1.953494 1.477079 0.3467884 0.3878945  
0.9019347 0.758444 1.065278958 0.211912534 1.802153 0.5362935 1.064175  
0.8632549 1.012707137 0.9079985 1.320875779 0.8365419 1.93616  
0.608031029 1.098119821 0.2641778 0.1580202 0.506189898 0.5299571  
1.363998 0.7524265 0.951369 0.4578218 1.707021 0.3311984 0.3299286  
0.07062056 0.856448 1.6214 0.474616 0.285671 0.712272835 1.487126 1.267653  
0.150405399 0.9411625 0.8649779 1.136594 0.5112942 1.072868 1.274396074

1.4244 0.4844175 1.27767 0.04226249 0.8089611 0.364598706 0.7144282  
1.302777 0.4297666 1.378620661 0.582335001 0.860905 0.6675156 0.685614  
1.104528925 0.9154528 1.18492 0.584470976 0.47853 1.166595 0.1266229  
1.68096 0.3467184 0.6067111 1.115103062 0.6910211 0.42245743  
0.4733473 2.126612 0.8311099 0.3210699 1.811054 0.4562749 0.648421  
0.632467273 1.229642 1.61283 0.823781785 0.9652 0.3031977 0.5908226  
0.4517222 1.008542 0.06095971 0.783294 2.215627 1.518903341 0.9327433  
0.230804272 0.5544239 1.183956 0.5768057 0.677090665 1.987540486  
0.6076282 0.9773901 0.8841898 0.09060764 0.3175539 0.340284956  
0.2346793 0.3442728 0.4618326 1.06221655 0.3845948 0.1544608  
0.787059172 0.3653989 0.386109202 0.8578883 0.8467332 0.932052904  
1.83218 0.6873773 2.92867286 1.329498947 0.7118886 0.5702098  
1.197146 0.7213013 0.7720142 1.369238 0.9808693 1.914815 0.507555  
1.234962218 0.5165262 0.470954226 0.4806275 1.274913255 0.5038384  
0.5633545 2.045599853 0.7592342 0.3621066 0.6864552 0.514777236  
0.415335 0.09721437 0.538280321 0.623573864 0.50734 0.6654037 0.2359341  
1.394987569 1.037704625 1.539431876 0.2817615 1.648574 0.02513612  
0.1430488 0.8122998 0.40719 0.558443 1.302805 0.672778 0.3556621  
0.2077535 0.731802993 0.8025364 1.802568 0.9034269 0.5490646  
0.8283936 0.2840322 0.4809587 0.2926615 0.7197571 0.6510834  
1.722428529 0.8196211 0.3347962 0.9024626 0.1877296 1.31467916  
2.947623 1.603928 0.3682813 0.5128958 1.214802 0.6713748 0.5755553  
0.602678432 0.527427 0.2573289 0.578495829 0.3228786 0.776109 1.707233  
0.4387809 0.9181519 2.06310042 0.728931722 0.6448475 0.9513449  
1.476826 0.344056647 0.688137247 1.072745301 1.534936 0.423304 0.3594673  
0.9980083 0.8645968 0.2966534 0.5540242 1.0592604 0.994064351  
1.199196 0.940781037 1.171468 0.253375743 0.5394894 0.743882 0.4976175  
0.9506292 1.024814 0.8394902 1.081059 0.6394042 0.3692633 0.853474443  
2.086343 0.1663103 0.4575599 0.2392134 0.604144172 0.7906045  
0.9998978 0.8041868 0.975507833 1.159627 0.4059027 1.083328 0.5642272  
0.9619646 0.295123 0.6422692 1.192792942 3.161292063 1.572189946  
0.307212 0.539479777 0.848446666 0.8069858 0.04539494 0.635514383  
0.7307036 0.6020202 0.5210515 0.776386794 0.7278356 0.4758279  
0.1932094 0.70975288 0.7904765 1.081021 0.305564 0.5712991 0.4619514  
1.050332 0.4312934 0.2052527 3.001235 0.75051 0.7256968 0.591881333  
0.4122901 1.683124 0.8682579 0.5427157 0.4191314 1.024155 0.4709176  
1.543966615 0.576415462 0.633191985 0.2041181 0.6749756 0.4648336  
1.368941 0.9074502 0.833339319 0.739552 2.136267 0.7348839 0.1103662  
0.3549853 0.265669219 0.9595349 2.694578 1.036666 0.2549322 1.056857  
1.75835 2.855692 0.801433639 0.2232075 1.086956 0.495719733 0.4265994  
0.3857856 0.5399721 0.9875303 0.6183093 1.008144656 0.8055926  
0.948712008 0.1848638 0.7853773 1.042621 0.2596637 0.5839631  
0.3781514 1.070535217 1.121564 0.485333034 0.2388207 1.357343 0.6083746  
1.086095 0.3110693 0.891741782 0.7794538 0.8930144 0.2515157

0.6624462 2.256954 1.731931 0.9797884 1.430218123 1.966784 0.55009962  
0.2618833 1.598906 0.531466449 2.536013 0.7378783 0.6709509 0.623594156  
0.8315212 0.7155694 1.090857 0.786822404 0.5733198 0.4939249  
0.8587678 0.4037689 0.9384908 1.160254 0.4856195  
HLA-F-AS1 0.2610161 1.136391011 0.4377227 0.965593829 1.006409533  
0.962564314 1.082429 1.371605914 1.115431 0.8276518 0.489347475 1.395032  
1.173283 1.823816 0.8211592 1.341848 0.6116258 0.633638487 1.280896  
0.5607815 0.98819088 0.4791449 1.578911395 1.535729 1.141492 0.800850438  
1.311885 0.7120012 0.2721853 1.300668 0.5335776 1.0804072 1.033188  
1.213646457 1.353547 1.880789568 1.512001078 1.592609428 1.479402 1.625823  
1.015296763 1.870139 0.882582696 0.6166557 0.554030479 1.128254 1.89991  
0.8324549 0.535758015 0.7841734 1.013213 6.728122 1.447370849 0.7869971  
1.089264114 1.518339 0.869796 1.620455 0.7067794 1.078505 0.5711634  
1.780204 1.585373989 0.6385093 0.7498686 0.993165 1.322303 1.374639  
1.538491 0.5478078 1.32053 1.486862948 0.6257749 0.5128978 1.132582131  
1.012969 0.871722325 1.764501 0.5354589 0.3010464 1.013623 0.6076693  
1.927102 0.868325519 1.457542274 0.5972138 0.8970864 0.7701243  
0.939069632 0.9402219 0.6620098 0.8573741 0.982990733 1.132799  
1.330656 0.546675732 2.994972 1.202144853 0.666007001 0.8510179 0.561850748  
0.5166908 0.4884568 0.118174283 1.401724 0.7789018 0.475047869  
1.646273 2.143896062 0.793397844 0.6693431 1.844873582 0.878148 1.708211  
1.269316 0.9216062 0.7910562 1.624841743 0.9697059 1.449994 0.8355797  
1.528407 1.007401 1.767703 0.8090143 0.7504206 0.6659333 1.931805  
3.639366 1.702582869 1.245984752 0.7162652 1.125952597 2.050251505  
0.9812878 2.07387636 1.501594 0.3443321 0.816532897 1.489071121  
0.801433436 1.352592063 0.7794995 0.9839394 1.467751 0.9231196  
1.000309 0.8145059 0.845851785 0.7874836 1.037409 1.175670511 1.655165  
0.8781668 1.005890173 1.522329 0.8887895 0.776964923 1.414576 1.327314  
0.796274051 1.348947 1.247957 0.6805213 1.607981334 1.603445 1.520065  
0.58110071 1.588756 1.331923722 0.912598 0.5563469 0.889335021 1.092445  
1.366023751 1.051234 2.728473 0.7899687 1.082575 0.8086424 1.692619491  
0.4675909 0.6464287 1.490763 1.394942 0.3124885 0.6639954 1.637516  
1.641038 1.201177262 0.331405776 2.200998 1.309452 0.837845 0.8239202  
1.279930546 0.9372004 1.034151357 1.892909 1.94133 0.38242718 1.259373596  
0.4587848 0.7033244 1.008508057 0.7023567 1.366896 0.3457027  
1.437099 1.435994 1.758841 1.444723 0.6370634 0.8214787 1.285723 9.321015  
0.9895425 1.033565 1.52433176 1.521663 0.7189128 0.563678335 0.785599  
0.7479334 1.294187 1.710798 0.9228104 1.460179412 0.9562343 0.8928513  
1.628827 0.1505987 1.147385 0.834919061 0.6420939 0.9139134 0.8238068  
1.842920758 0.775180924 1.720766 0.8234993 1.127288 1.236563757 1.438075  
1.080248 0.763534727 1.415555 1.697409 0.7779474 2.912018 1.088325 0.9741254  
1.822579807 0.7828298 1.038200001 0.64991 2.324417 1.435107 0.9152836  
1.047226 0.6078666 0.7270396 0.527111993 1.9081 1.65575 0.563958087  
0.5558278 0.6884873 1.982965 1.228371 0.4551458 2.08236 0.8326593

1.171383 1.301548906 0.6479988 0.83308592 1.325352 2.254943 0.798963  
1.648120415 0.717712438 1.269273 1.356107 1.746535 0.9129494 0.4793866  
0.543568372 0.8506775 7.332513 0.9571543 0.696113199 0.8331336  
0.7085707 0.609278721 0.8979771 1.159734029 0.3887146 1.776445  
1.067393499 1.104216 1.188616 1.32873026 1.047603378 0.7508205 0.9535711  
1.306255 1.185121 1.221136 2.116171 1.189186 0.9200711 0.8132588 1.130831213  
0.6346883 0.858702868 0.3134602 0.947871616 1.205177 0.8673224  
0.775013448 0.6113595 0.5501115 0.649984 0.652001893 1.078388 0.7406111  
0.539860805 1.564374827 0.1360147 0.7150197 1.135469 1.176008903  
1.36753714 2.422226446 1.183436 0.5653136 0.5188905 0.6300787  
0.9803795 0.7416804 0.9119739 0.8499687 1.137518 0.714847 0.7828582  
0.986032842 0.5270121 1.725313 1.269074 0.7594858 5.058959 1.54727  
0.894919 0.8307028 1.314935 0.6573196 2.379472126 1.398778 0.7757549  
1.231746 1.168754 1.440424127 0.9814261 2.673103 2.315707 0.4393584  
1.753454 0.7463928 0.7987437 0.464344159 0.4340647 0.9264549  
0.594515868 0.5951118 2.94679 1.011353 0.841086 1.433107 1.137027439  
1.183049586 0.8116907 1.51967 0.7307394 0.628861494 1.330039084  
1.466441414 0.898315 1.067251 1.116297 0.6669436 1.220507 0.8869907  
0.9324409 2.160622536 1.336830352 0.7788643 1.367519618 3.783713  
0.567328304 1.214612 1.744538 1.171953 1.437659 1.374175 0.9672309 1.352517  
0.6827255 0.4940692 1.811827174 2.338023 0.8128823 0.655938 0.837719  
1.616673162 0.9141739 0.4966831 0.9881549 0.861014896 0.7056681  
0.5090773 0.4048924 0.8146292 1.446659 0.7952094 1.257272 1.654777046  
1.753784255 2.323737908 0.6077601 1.030691254 0.801324673 2.837485  
1.266197 1.345054332 1.177994 0.7333075 0.4983558 3.183086621 0.8797359  
0.3614384 0.6133053 0.603007289 0.7023305 0.922009 0.8396777 1.10507  
0.8798244 1.701257 0.7916237 0.6904163 1.684657 0.2747776 1.022493  
0.820212253 0.7250809 0.5769079 0.6134578 1.441297 0.6341099  
0.9835732 0.7040194 0.96182048 0.737335469 0.656079331 0.8604805  
1.070174 1.253215 1.331952 1.643971 1.666288879 1.306846 1.17478 0.8783708  
0.7323148 0.5452409 0.743725662 0.8010542 1.328512 1.117485 1.46445  
0.3109388 2.40657 2.090013 1.221117146 0.4571151 0.6986274 0.77155453  
0.8682728 0.9648088 1.438584 1.932404 0.8968821 1.318555944 1.709796647  
0.402181018 0.9994766 1.902943 0.796464 0.6987527 1.605523 0.9193597  
1.104101911 1.11523 0.910803154 0.4830704 1.528865 0.5232837 1.29209  
0.507602 0.511344953 1.284113 1.412001 1.310385 0.832489 0.4149621 0.7407008  
0.8279064 1.015021055 0.9968936 0.612854065 0.8938681 0.6674518  
0.991290696 3.237218 1.472798 0.7732675 1.535626227 0.7368929 1.690894  
1.909061 0.600661488 1.578022 0.5619598 0.2272786 0.9044945 1.646112  
1.183854 0.4836501  
SH3BP5-AS1 0.4191334 2.491836956 0.9486712 2.319448412 1.628064705  
1.370112767 0.7260216 1.968474882 0.3898329 0.2274763 0.362234129  
1.442684 1.369389 3.090228 3.835816 3.660402 1.454352 0.907171401 0.7716702  
1.761112 0.656429408 2.555746 3.761988821 2.336572 1.652755 1.845054402



1.500374 0.2883359 0.9416887 2.341437 0.6561589 1.16765162 1.144574  
2.889455164 1.635102 3.929284106 2.201627623 3.564459889 2.33081 3.274155  
1.631266887 3.334035 0.417461256 0.7988587 1.724791925 2.650425 3.217396  
1.703965 0.398242143 0.4167247 2.309228 3.225523 1.971612016 1.231707  
0.865891 3.401486 0.7038539 2.441357 0.2468658 2.200424 0.2661159  
2.077845 2.161309421 1.464326 0.394459 0.8486559 0.3339945 1.673891  
2.521227 0.5870312 0.9137893 8.344329444 0.2642338 0.1669065  
1.16041535 1.077119 0.386499446 1.963164 0.8396934 1.648165 1.032458  
0.390325 1.445181 0.749713964 2.38949598 0.403217 0.4126212 1.720503  
1.920004335 1.233124 0.3392281 0.2806479 2.433863986 1.359201 1.500455  
1.332024104 0.8653597 3.6443784 0.559727151 0.3841873 0.257867464  
0.3555156 1.013386 0.643191311 2.981734 0.5426761 0.587955118 2.079148  
3.301165494 1.849683258 0.3488815 2.967539546 1.046342 3.130242 2.712258  
0.5388344 1.495377 2.821678954 2.184056 3.803026 0.4350611 0.5441021  
1.030984 2.047743 2.638088 0.7616061 0.7917593 2.174266 8.142057 5.294331752  
3.595570619 0.8908211 3.711043617 1.59317207 0.5112867 2.544866596  
1.37143 0.393538 0.547963411 4.179340612 0.265151267 2.083889085 1.133308  
1.309725 1.012404 1.373665 3.097435 2.223436 1.789225855 1.399681 2.659187  
2.2379233 2.432739 1.825631 0.663276369 2.552271 1.186858 1.081230907  
1.911711 0.6554228 0.701460903 1.440022 2.849127 0.655764 1.914736924  
2.406716 2.096028 0.501333071 0.2519384 1.881760286 1.17597 0.7321294  
1.256598904 0.9767216 3.453777207 1.875931 6.467443 0.4170789 0.9961151  
0.4709959 1.126924363 0.6387257 0.306998 6.446366 3.70064 0.7040617  
0.1605384 4.144792 2.788214 2.581848561 0.245025233 6.574088 1.329495  
5.178907 0.5933939 2.695303478 2.073881 2.919004797 2.37226 2.094916  
0.636914781 2.166991228 0.9117828 0.4938081 3.105721806 2.312361  
0.5972861 1.429929 1.34069 1.44171 1.837563 1.589558 0.5150391 0.2213899  
2.698238 4.261231 0.3016906 1.023493 2.137222289 2.165115 1.71624 0.54560326  
0.8749669 1.337167 2.029288 1.469001 0.6822809 2.75730717 3.2798  
0.8436724 1.173008 0.06813748 1.743132 0.629385605 0.2961857 1.939153  
0.472191 2.342085191 0.625911089 2.187883 0.7939955 1.777962 1.896976648  
2.450244 1.312389 1.799206601 1.336645 1.9704 0.3856111 0.5849711  
0.4855916 1.481742 4.220277575 1.551883 0.55762969 1.06362 4.705736  
3.769107 0.513809 2.123102 0.8861938 1.208759 0.869447641 4.270209 3.769935  
0.173922831 1.958722 0.3541294 1.817406 1.143446 2.161451 0.4659294  
1.086648 3.553856 3.447714807 0.5558958 1.547886755 1.701959 2.330487  
2.194937 2.604909115 2.379686298 3.855086 1.612269 2.597036 0.787218 0.9751897  
0.419086773 0.4855627 8.442273 0.4219328 1.598382999 0.8828852  
0.2398054 0.524021974 0.3756659 0.864586932 0.4922584 3.120724  
2.03365067 0.9169141 2.433607 1.08963182 2.725657075 0.3719524  
0.5854734 3.008084 3.425982 1.634423 2.976099 2.157344 1.840515 0.8110291  
2.118344007 0.2105847 0.457209019 0.9636443 0.4885722 2.822028  
0.4986555 1.381804247 0.9173301 0.3538209 0.5352831 0.950537559  
0.6728566 0.6356409 0.317947278 2.401678475 0.578353 0.6848117

0.808315 3.156910644 1.949549326 2.854411438 0.5368628 0.6387215  
0.4998156 0.4395762 0.6628973 0.8581569 0.3291591 0.5473369  
2.309169 0.5074263 0.7542568 0.971903498 1.173688 0.6656458 2.49351  
0.7587656 11.7753 1.874118 1.009281 0.8283449 2.510604 0.911006 2.950724875  
3.564598 0.5055022 3.6039 0.8781051 3.676563703 1.567063 6.849562  
1.813128 0.5250245 4.311032 0.2434015 0.6914034 2.71074173 0.5800779  
0.5232063 0.600587429 0.3651145 3.135146 2.362945 0.699562 2.040394  
0.927231167 2.413002295 1.670769 2.704528 1.914038 0.300464435 2.365484967  
1.541361882 1.094194 0.7049379 2.403081 2.854232 3.061629 0.3749463  
0.5142797 3.263771048 4.41230327 0.3759383 2.553049248 7.397381  
0.448849799 2.197854 1.519139 0.9855184 3.09586 2.222607 1.185501 2.966506  
0.2922791 0.9995881 2.218531194 5.067969 1.142047 0.6475354 1.246287  
2.709642675 1.111232 1.177619 3.13624 1.242946089 1.073291 0.403681 0.6549712  
0.6475099 2.019028 0.7080515 0.7776133 2.681275686 5.909794233  
4.908573598 0.3824825 0.975767424 0.348681363 2.650305 0.9677048  
2.537116703 1.569019 0.8510368 0.3430886 2.082817203 0.2607665  
0.7826492 0.7181825 0.603025544 0.5410023 0.8628916 0.4130247  
0.7692124 0.7447787 2.086807 1.29171 0.5101646 5.275554 2.085271 3.99967  
0.586102698 0.9070557 1.098932 1.808132 1.439501 0.4551876 0.4586636  
0.414767 0.212261824 0.463337622 0.524225687 0.573795 2.223257 0.5388028  
2.292148 2.700982 2.459776823 1.176567 2.788598 0.4188732 0.6870356  
0.707455 0.335209964 1.890784 4.401284 1.04671 1.375753 1.775909 2.641052  
1.377862 2.476538984 0.6610855 4.751807 1.065628813 0.4506838 1.341527  
2.756796 2.054304 0.9293277 2.249814344 3.210953273 0.509852032 0.08730632  
2.552226 0.7740969 0.6023787 1.899328 0.5201572 1.581348571 0.7882051  
0.217354363 0.3093463 1.691933 0.8573346 1.202742 0.7467074 2.776015309  
1.354929 0.8270308 1.679091 1.731496 0.5061325 2.228197 2.070147 1.35765699  
3.371874 1.39275411 0.7010938 0.1216327 1.623384495 6.624894 0.7737499  
0.571953 1.584452641 0.3994764 2.800369 3.174001 0.737738534 0.7959525  
0.5997037 0.4118131 0.2336831 1.466927 1.389148 0.7119695  
AL356481.3 0.1649582 0.573079869 0.3408528 0.727229846 0.469373869  
0.37814865 0.2392975 0.395354973 0.2221031 0 0.055139416 0.8490663  
0.6407736 0.5007511 1.040301 1.357282 0.2145954 0.496366095 0.1369019  
0.2757967 0.66607253 0.7185784 0.799271383 0.9238754 0.4545845  
0.382364783 0.8689124 0 0.1476265 0.6067822 0.355232 0.463498603  
0.2738855 0.818036862 0.5294887 0.851666759 0.882325326 1.246149139  
0.9102254 1.230258 0.587256079 1.449797 0.114034801 0.5340941 0.251662323  
0.6890715 0.8840625 0.0611125 0.333022033 0.2573848 1.147614 2.89966  
0.887560842 1.009369 0.228049691 0.4414008 0.1113925 1.011882 0.02140312  
0.6635671 0.17118 0.8995895 0.791603068 0.392664 0.1685541 0.2072196  
0.1117473 0.3452984 0.9615526 0.2041729 0.7076409 2.03343627  
0.2218548 0.06656522 0.229358172 0.3931209 0.108857839 0.2969788  
1.612975 0.6517306 0.195148 0.2186354 0.7258306 0.03063514 0.989244865  
0.1778871 0.09623421 0.9069423 0.332926574 0.5012896 0.142912

0.2116272 0.915166845 0.6113605 0.5704059 0.111136899 0.5728141  
0.898194177 0.256257691 0.2459963 0.060495311 0.070191 0.3072132  
0.343548055 1.209596 0.1251033 0.143856887 0.6985114 1.107856366  
0.521947537 0.2876955 0.699802732 0.4909405 1.06332 0.7687638  
0.348858 0.3851178 1.041976518 0.4220152 0.521897 0.0481972 0.2066642  
0.1454626 1.180568 0.7805011 0.293673 0.3054298 0.9214521 1.125544  
2.039173605 0.870332312 0.05366691 1.72278477 0.72334327 0.3013449  
0.568061786 0.2567841 0.09268689 0 1.066432001 0.128959679 0.653544856  
0.4334084 0.2826522 0.5233983 0.4763839 2.373287 1.479922 0.951123209  
0.3920064 0.5523595 0.283469107 0.668303 0.6928224 0.439154743  
0.6392546 0.7328081 0.385012223 1.000795 0.1166938 0.049252607  
0.7500263 0.3990771 0.2412639 0.801204094 0.7175839 0.7671921  
0.106919972 0.04051509 0.352006908 0.3772097 0.1073478 0.275695689  
0.1027793 0.902547551 0.626245 4.922022 0.05365752 0.1547797 0.08435989  
0.243597309 0.2570195 0.2135514 1.62213 1.055277 0.3716366 0.09556046  
0.7561526 0.9129142 0.839418023 0 0.9753946 0.2780904 2.076702  
0.5378541 0.968990897 0.4054411 0.939504027 0.7047814 0.414978  
0.202473884 0.560382139 0.1887378 0.1567988 0.290603306 0 0.1894837  
0.6135191 0.5210965 0.7746722 0.5874005 0.3697182 0.08418302  
0.1261345 1.496436 1.063075 0.2187627 0.3401555 0.318045305 1.424655  
1.001445 0.100738921 0.05796545 0.1907316 0.9811934 0.456608 0.2634824  
1.182432315 1.42718 0.1922693 0.4278805 0.07548448 0.04128214  
0.355202724 0.1822901 0.2538406 0.2046935 1.136462945 0.086675079  
1.578655 0.3338275 0.5539705 0.626280859 0.8656297 1.206104 0.357129153  
0.5381421 1.157578 0.1130797 0.8121086 0.5066748 0.3973343  
1.485849819 0.4816483 0.158851727 0.312445 2.170466 0.9766017 0.2676141  
0.9989513 0.4074733 0.8324105 1.448888071 1.443249 1.533251 0.026274034  
1.029213 0.1083075 0.3316533 0.5086444 0.3930203 0.3629312  
0.4554985 1.952617 1.392142689 0.06407541 0.386471718 0.8102039  
0.7552319 0.5307221 1.238136682 0.652026148 1.356596 0.3273194  
1.132285 0 0.2700851 0.15194463 0.1257473 1.503092 0.08248732  
0.716724203 0.3052977 0.06130677 0.210863418 0.1702524 0.22987487  
0.07182483 1.288289 0.566007362 0.2856885 0.8482398 0 1.055378101  
0.1589369 0.2732411 1.083358 0.6625578 0.6518363 1.76625 0.3893151  
0.7912001 0.217569 0.997119822 0.06362488 0.217074891 0.4292213  
0.259417132 2.219751 0.473506 0.329840624 0.3173753 0.1175916 0.07212169  
0.282903664 0.2257727 0.1446944 0.077952605 0.78891131 0.2745919  
0.2097298 0.2633742 0.189233096 0.949883231 1.464050999 0.0915001  
0.1369534 0 0.1965366 0.2901676 0.2780764 0.2574007 0.08310437  
0.5767872 0.2722472 0.272115 0.360569319 0.4934655 0.1412081  
0.7569971 0.1961354 2.071416 1.268265 0.1051879 0.4443111 0.7276691  
0.440013 1.164853185 1.99255 0.1281375 1.016722 0.502952 1.956776083  
0.3821161 2.436688 1.020697 0.05234722 1.51058 0.1998556 0.3225072  
0.436393008 0.1314461 0.2298059 0.516621927 0.6487753 0.3465495

0.8666335 0.3396037 0.3767336 0.130824027 0.352607515 0.4775564  
1.21898 1.451642 0.230443158 0.697581951 0.319336065 0.2261055 0.2520193  
0.6712235 0.8443562 0.6464281 0.08830814 0.1199437 1.545077134  
0.443871343 0.1147429 0.67927698 1.345078 0.201133827 0.7770766  
0.7592217 0.3703284 1.828515 0.9951725 0.2726186 0.4973442  
0.196902 0.5862546 0.713539374 1.937723 0.09901487 0.136207 0.4272559  
0.639439422 0.2172444 0.2279878 0.7764041 0.343560358 0.3945133  
0.0999969 0.2015539 0.1889548 0.8975423 0.3953365 0.4351253  
1.340110399 0.894470102 1.524379747 0.08230611 0.404072623 0.118854865  
0.1478304 0.1621586 0.694949358 0.6960534 0.2571275 0.07545756  
0.811723508 0.1061206 0.1545218 0.2300592 0.144877756 0.2172092  
0.369123 0.2728819 0.6583161 0.4469212 0.8953563 0.2407273  
0.04582489 1.096459 0.4377065 0.9505155 0.323018523 0.6443377  
1.067994 0.4153886 0.4064963 0.1403635 0.3369635 0.2570027  
0.128263192 0.079194472 0.152829182 0.3645726 1.127787 0.2686049  
0.8482818 0.706496 0.372104122 0.2201507 1.970329 0.1789863 0.09856179  
0.1320905 0.103153984 0.3024375 1.853357 0.5680971 0.7114549  
0.5849021 1.47365 0.8562908 0.858858102 0.1594672 0.5600187  
0.35415942 0.3712033 0.810643 1.468575 1.300814 0.3770966 1.129211165  
0.621325234 0.254172322 0.1500831 1.906866 0.4262894 0.3942147  
0.4237223 0.2170965 0.626907865 0.2465489 0 0.06562377 0.4713979  
0.651966 0.6172283 0.1555671 0.707879274 0.773429 0.4815099 0.2395887  
0.6722651 0.1493006 1.084692 0.6952005 0.644591927 0.7958796  
0.283840774 0 0 0.92490567 2.150717 0.4178754 0.04132334 0.704644796  
0.2475282 1.114214 1.239869 0.239205657 0.1535999 0.3594119 0.04719489  
0.05547434 0.2958046 0.6033323 0.4565046  
AC021087.3 39.12883 2.646340343 0 0.074141341 0.279141522 1.15657167  
1.372301 0.028790414 0 0.4691567 1.91130423 0.07637877 1.105536 0  
5.693697 0.7431269 0.03125439 0.44981955 0.0279144 0.3749009  
0.501916357 0.9580065 0.174612859 0.8655245 22.9408 0.216567918  
0.1197107 0.5410899 2.377991 0.03255877 30.30074 0.166778283 3.164575  
0.507646989 1.250099 0.520966369 2.017136397 0.146590785 1.246971 0  
0.052061709 1.610044 0.058129442 11.05594 2.337643524 5.022953 0 18.25519  
0.104466813 0 0.07312479 0.08062402 1.374064017 1.243442 0.033213924  
0.3000065 1.447955 14.95846 0.5673346 0 2.443261 0.1888218 0.493192416  
0.1455718 0.6873658 0 0.02278536 0.8918168 0.1400438 0.1734625  
0 0.355387798 0.3675453 0 0.051962549 0.09108822 0 0.08257388  
0.4698382 55.86056 0.09947703 1.649457 0.2192554 0 0.966516204  
0.07254262 0.2452778 0 0.084854956 1.344912 0.1699826 0.04794549  
1.625253405 0.06232841 0 0.736479008 0.1459965 0.249739677 0  
0.03582773 1.202666098 0.03577999 0.9744153 0 0 0.06377161  
0.073331303 1.562102 0.218605838 0.050678797 1.093234 0.228304437 0.969749  
1.494243 7.883677 5.33493 0.02804493 3.934439834 36.01159 0.2046445  
4.102958 5.925793 0.09886642 0.07079962 1.405778 25.66291 0 0.4202685

0.0717185 0.141746231 18.717949857 1.395197 0.439096296 0.235984329  
0.02560185 0.0386094 0.1963442 0 0.256091484 0.120803467 0.021912475  
0.138810687 5.523267 0.02881649 0.07622949 0.2428375 0 0.1539577 0  
0.3197216 0.1689397 0.041285394 0.3206293 0.06421226 0.05267292  
2.281028 0.02767039 0.098130332 0.04637789 0 0.025106604 0.02730909  
0.3698732 4.525837 0.14083283 0.2633686 0.1251448 0.027251323 0  
0.681857353 0 0.2918438 0.187381822 2.802968 2.371156873 0.04256394  
0.2412509 1.148785 3.392668 0.5446997 0.58982726 0.08734411 0.02419072  
0.1560158 0.4610821 5.599075 0.2192045 1.340696 0.9307192 1.825684588  
6.700213898 0.7955346 0.8190408 9.868327 1.718145 0.043906207 0.08266972  
0.808832269 0.6323039 2.867485 0.131359991 0.095218596 0.06413962 0  
0.032919011 0.4135759 0.3035675 0 0.369572 0 0.199619 0.628215  
0.1287373 0.2143242 0.6441516 0.9343176 0 1.155966 0.108082772  
0.09847054 0.1331709 2.772999547 0.2363839 21.35078 0.2069648  
0.8952181 0.04884023 0.180824091 6.421043 0 0 1.539134 0 4.285210168  
1.821285 0 0.2347714 0.496554858 0.795289954 0.167215 0.2187889 1.3079  
0.127699111 0.2287995 1.276028 1.260326901 0.06454562 1.213873 0.4034981  
0.8279476 0.0286976 1.730812 0.128921631 0.7979435 0.769262022  
1.667644 0.1106399 0.1194779 0.3897622 0.2909813 0.7652483 27.9684  
0 0.0319869 0.142105 0.133932354 3.462643 0.1545878 0.5532901  
0.03576308 1.035104 0 0.03317017 0 1.382902244 1.469815 0 1.652012  
6.211023 1.209457 0.645820098 3.545295838 6.546457 0.1112344 0 6.269599  
0.2202822 0.232362134 0.06409992 0.7662036 0.700801 1.461405733 3.00877  
0.2187586 0.9554489 0.08678646 0 0.07322567 0.171315 0.13577565  
5.454514 0.02275746 0 0.153708817 0.918208 0.07597372 0.3778509 0  
0.07667878 0.2493275 0.8930432 0.3903055 3.844747 0.092415199  
0.5189263 1.466169612 40.99906 1.49870122 0 0.1206853 0.957086643  
0.2647352 0.1198851 3.382302 0.360526611 0.7234104 0.3835429  
0.476837742 0.09462328 44.98755 0.1425469 0.8771359 0.739541282  
0.873930364 0.509670063 0 0.06981222 0.04577092 0.4007395 0.9860898  
0.1090384 0 0.02824173 0.04900305 0.09251899 0.1765414 0.459502124  
0.2874799 0.7198106 0.06092852 0 0.452532 1.206801 1.680084 0.1865198  
0 0.12817 0.060901126 7.62816 0.04354556 0.07584526 0.2468851  
0.797976062 0.4761396 0.704979 0.06937361 0.8005227 0.336009 0.4366147  
0 2.254181377 0 0.6091486 0.023940813 0.03674604 1.413234 0.2617884  
0.05326572 6.348636 0.755794835 2.461086961 0.1145578 0.07531847  
8.482666 0.313250156 0.135464242 1.994081035 0.2305154 0.1427414  
2.052944 2.741884 0.2562917 0.5401828 2.384519 0.128588703 0 12.8289  
0.218692197 0.8380238 1.384132385 0.221825 0.5805219 0 0.04438517  
0.6884663 15.66366 2.266786 0.08029691 2.465466 0.19839707 1.468973  
0.100946 0.2777269 0.2903926 0.122233267 0.1291975 5.888337 0.178098  
0.050037286 0.8044155 0.0509736 0.4520669 3.114348 0.1307211  
0.01919271 0.8065669 1.121023429 0.569947151 0.081795293 0.4195568  
0.538708387 0 1.205709 0 1.417006669 0.8692954 0 0.3590032

0.241370207 0 8.821991 0.7036384 1.624737242 0.1476304 0.02894786  
0.07587384 0.7382711 1.752453 0.1738703 0.02454224 0.09343727  
0.6831268 0.05578042 1.079174 0.149690241 57.87798 0.08065363 1.15754  
0.318788 0.0954007 0.294459 0.1667369 0 0.565173317 0.093485936 0  
0.1982384 0.2240539 10.93751 2.309117 0.137949626 0.8336507 1.434827  
0.04055049 0.05024204 0.2154668 0.084132682 0.1284734 0.1828552  
0.042902 0.2030926 23.55424 1.083692 0.1138685 0.693190364 2.845104  
0.03806274 0.090266696 0.01991806 0 0.04469305 0.29221 0.9611282  
0.902319157 0.1666956 10.278806797 1.438296 0.6256735 0.5489729  
0.04728274 0.2658378 0.1229615 0.543264573 0.2199378 0.843582975  
0.1003555 0.17164 30.5015 5.011658 0.04531463 0.72168543 0.2628379 0  
0.09159809 0 1.156815 0.9010605 0.1466399 0.243393984 0.587567 0  
0.4768691 0.1595334 1.265530925 5.448436 0.4915678 0.04212929  
0.023173802 0.04588288 0.1002305 0.06019288 0.640161415 0.02609927  
1.532309 11.35523 0.08483442 0.03350821 0.08023035 0.0232704  
AC011477.2 3.759024 6.355963422 1.666946 3.541396158 2.539681267 2.478906054  
3.025321 2.873789733 1.559967 2.708839 1.583536979 1.74618 2.461838 4.671054  
1.948447 3.467981 2.641251 1.756054499 2.153864 2.716709 2.693941557 2.726253  
2.958370308 4.707896 2.767117 2.519806526 3.342853 1.960496 2.801858 2.910987  
4.953063 2.723502044 2.76438 2.353743414 3.270914 3.25674687 2.837735683  
3.306489639 2.770332 4.787081 1.753479064 3.895332 2.011240819 4.117338  
3.055075552 4.0439 4.310382 0.9538461 1.311449834 1.675776 3.08982 6.20446  
3.119508489 2.940797 1.789873488 4.13364 2.851334 4.650307 1.643579 3.158878  
2.297734 4.955585 4.090999688 2.451486 1.82402 3.600844 1.813922 3.751043  
2.795766 0.9135315 2.899282 4.570263929 1.506282 2.597381 1.861511766  
2.353933 1.454392741 3.20254 2.957107 3.255115 2.436701 1.801784 3.574863  
2.199509923 3.216701713 1.976846 1.216642 6.163747 2.511559275 3.162602  
1.933166 1.864408 3.335994864 2.430064 3.415482 1.300971438 4.760818 2.854787533  
2.026504001 2.01849 2.039499913 0.8107023 1.96062 1.036674595 3.809447  
0.722468 3.659876972 3.319953 4.060704309 1.598280485 1.567544 4.229209561  
2.04975 2.996311 2.230382 2.003756 2.455895 3.734513901 2.661078 4.110489  
2.542651 2.112782 1.407639 2.225614 2.062834 8.643469 1.628168 3.375999 3.513506  
3.674628677 3.104954734 2.529658 3.984503075 2.908295473 3.104245 3.522887693  
3.587066 3.510562 1.078170173 3.18102681 1.89203872 2.414130361 3.749551  
1.711718 3.096523 1.635791 4.126236 2.715272 2.751786515 2.25159 3.810591  
1.972016359 3.264257 3.119558 1.999855219 3.653303 2.711157 2.103249454  
3.408095 3.909853 2.659827946 2.792821 2.287672 1.852703 3.242733258 2.831379  
3.161231 1.702186852 1.327958 5.911690394 3.630626 1.697827 2.141971574  
2.005229 5.114662266 3.127825 5.850373 1.44048 1.723276 1.299136 2.338276284  
2.371284 1.22955 5.464923 4.00005 3.71233 1.804728 3.797183 3.585181 2.620333133  
2.277092323 4.993469 1.909795 2.461208 2.417715 3.737319216 2.17688 3.766970241  
3.097671 1.352971 1.861656533 2.351826961 2.160273 2.271113 3.326214098  
1.815064 3.565862 2.553554 3.479635 2.727217 3.894288 2.923758 0.8671948  
0.8268587 3.342565 7.369361 1.673083 1.8936 3.193546665 3.180887 2.60963

1.488478624 2.135155 4.441602 3.506492 3.135771 2.691781 2.417663249 3.312266  
2.745865 3.495016 0.5890822 3.840225 1.238163676 1.843683 2.086629 1.805098  
2.533993304 1.893958704 3.481558 2.247911 2.384583 3.831805258 3.102475 3.09723  
2.812768657 2.984236 3.551557 1.48256 2.212437 2.548197 1.894309 4.480341618  
2.518391 1.5867925 3.201379 5.826793 3.024178 1.63497 3.17773 1.566533  
2.621054 1.02722562 3.682557 3.335842 1.623940698 2.265022 1.095423 2.917639  
2.825167 1.799387 5.075519 2.965651 4.307347 3.097719993 0.9800894 3.168844289  
3.175473 4.070681 2.728692 2.750424831 2.284136719 15.3016 2.815524 3.627564  
8.790121 2.512437 2.063254653 2.198189 20.21852 1.768119 2.948012944 1.842504  
1.435317 2.398892547 1.151499 2.104898374 1.390095 3.496984 2.577526021  
4.523895 2.661808 2.76331891 3.270943646 1.190732 1.892001 3.666602 3.69986  
3.271295 3.18937 4.849002 3.218728 1.811106 2.565550293 1.390283 2.015926898  
2.8034 3.041242586 3.539506 1.958482 1.758295983 2.035481 1.633483 1.283273  
2.229862958 1.389411 1.752515 1.47624685 3.621575042 1.902913 2.327801  
2.312984 2.500678042 2.820520042 4.035144932 2.256456 2.329954 5.773994  
1.582856 2.375181 2.443881 2.289986 1.400864 4.501257 1.98298 1.714316 3.235972612  
2.449978 3.931901 3.308266 2.134155 18.42852 6.017719 1.324366 2.447584 2.78637  
2.570497 3.8599808 4.849029 1.89331 2.631938 2.00032 3.603888633 2.173576  
4.810522 2.605616 1.356282 3.943819 2.19246 2.995054 2.506535301 1.053163  
1.721673 2.184462718 2.092729 2.509756 3.90764 1.598319 3.223662 2.300547373  
1.964329849 1.753816 3.482314 5.106178 1.510641225 3.504861492 2.193051694  
1.799822 3.286679 3.243154 1.87431 4.282421 1.764245 2.695803 4.370340495  
3.448584206 2.793822 3.23645455 19.73438 1.820796179 3.027308 2.322592  
3.144374 4.348879 3.372812 3.853851 3.652972 1.843952 2.401949 3.057598268  
3.908462 4.945368 1.003436 3.267626 5.364461085 2.317018 3.819394 3.405198  
1.853824408 2.324486 1.935336 2.340521 2.162756 3.057936 2.092068 3.309289  
3.153563057 3.245914001 4.257618158 1.610078 2.833199424 1.855090856  
3.184133 5.49222 3.037102242 2.878967 1.722051 1.554622 4.265367602 0.9772373  
2.291193 1.974924 2.781346164 1.921118 2.127243 1.750124 1.870054 2.725835  
2.156105 2.134135 1.344645 3.460744 3.279234 2.72437 1.668339177 2.758449  
1.679277 3.077454 2.947803 1.825665 1.773148 1.706629 1.00096818 1.664574366  
2.175451221 1.995969 4.783034 1.737938 3.084144 4.501616 3.970432887 2.96488  
3.397471 1.763088 1.322986 1.335964 1.223623537 3.713425 2.78075 2.206868 2.84273  
4.182821 4.615239 4.300049 2.681017419 1.576347 3.23992 2.24794456 1.585659  
1.720746 4.105355 3.5238 2.488826 4.03940608 4.042395443 1.719089851  
2.155102 3.954641 1.876999 1.809682 3.479704 2.349325 2.876731122 1.962554  
2.386160869 0.757951 2.543626 5.042728 3.564477 0.9018645 3.402970123  
2.768445 2.611609 2.655052 2.417526 1.882874 2.834192 3.127999 2.817027696 3.11838  
1.540345301 1.735921 1.782928 2.38573231 5.655777 3.351414 2.760498 2.937562498  
2.781669 3.723654 3.649218 2.258785772 2.796957 1.489124 1.075465 1.489254  
3.570425 4.159783 1.197023  
AL022323.1 0.512083 0.526617742 0.7850536 1.551157705 0.493529212 0.951422202  
0.1078339 0.542956523 0.2001713 0.1579963 0.231908203 0.2850836  
1.362307 2.336161 0.6743963 0.9816247 0.497327 0.629606361 0.3948268

0.3866533 0.504600401 0.2822966 0.480230977 0.4800844 0.6145441  
0.280791508 1.086478 0.4251824 0.2483581 0.1535059 0.2845815  
0.409539149 0.2468404 0.491505952 1.155335 1.381622407 0.337357218  
0.431960305 0.3759911 0.5500899 1.288649703 0.8710902 0.428226296  
0.9487566 0.35281813 1.09715 0.3288236 0.07343718 0.800366433  
1.435999 1.177943 0.2375755 0.474025296 0.2779632 0.391487005 0.8840316  
0.6190899 0.2026584 0.167177 0.4485318 1.028511 0.3974307 0.63416477  
0.4933012 0.2700622 0.622525 0.9534137 0.3734418 0.5447219  
0.306686 0.8237787 0.954137634 0.5331933 1.619788 0.35217251 0.7086035  
0.88951756 0.4055353 1.492158 0.3636129 0.2931298 0.394092 0.7914501  
0.478574028 0.099062312 0.4061477 0.7083069 1.525786 1.000171265  
1.204771 1.230756 0.8759445 0.620815477 0.8326086 1.028161 0.033387522  
0.4947405 0.24530334 0.564552385 0.7812467 0.272608182 0.2108664  
0.02050941 0.344026701 1.485839 0.5261658 0.216085972 0.1759993  
1.481585645 0.238937022 1.162861 0.151367989 0.7743086 0.1899376  
0.2988771 0.3772916 0.380145 0.765180712 0.2535619 0.3497561  
0.08687584 1.443491 0.4661288 1.613373 0.07815885 1.436801 1.002264  
0.6264891 0.422667 0.3063022 0.796841048 0.2902051 0.517555508  
0.538917191 1.086353 0.568853234 0.5014266 3.174308 0.037731347 0.545824653  
1.627155824 0.801707868 0.2790079 0.424569 0.6738783 0.190819 0.3249014  
0.9436304 0.50177767 1.083445 0.381659 0.29197445 0.3543004 1.02176  
0.72949517 0.2363613 0.6685998 0.192774319 0.3279891 0.4674254  
0.562261997 0.9817575 0.2615781 0.5508481 0.730388195 0.1724601  
0.1106296 0.722715328 0.158229 0.655645051 0.2266411 0.1289968  
0.8282394 0.2315756 0.166856311 0.6020328 0.5687168 0.5319496  
0.201494 0.1520594 0.164657272 0.5319138 0.9979618 0.3677864  
0.588759 2.307357 1.593298 0.395064 0.6723691 0.790152284 0.496173663  
0.1172104 0.4455645 0.3595232 1.271104 0.556328804 0.2679639  
0.577031963 0.1355066 0.08311123 0.331782512 0.766922613 0.2835012  
0.09421033 0.892425107 0.08124585 0.08132045 0 0.2178042 0.6981763  
1.630207 0.2073306 0.8598631 0.2905135 0.4995071 0.37443 1.232254  
0.9537625 0.286639578 0.7399181 0.3924159 0.766682486 0.121897  
0.5156927 1.626307 1.1818 0.2590523 0.142089568 0.521957 0.9386187  
0.4499005 0.4762148 0.9673479 0.248988325 0.06571587 0.177936  
0.307468 0.406445112 0.260387516 0.6405541 1.862487 0.1576636 1.22294917  
0.7512576 0.8067086 0.808786584 0.5705913 0.2980776 0.5944957  
0.07393091 0.8118092 0.4991684 0.778783643 0.9224358 0.23860957  
0.2098139 0.2608188 0.8449594 0.9647531 0.2858123 0.7989014  
0.08698124 0.073774918 0.3016194 0.1674968 0.189436608 0.1700567  
0.4164802 0.8151923 0.4004569 0.05903517 0.3052869 0.5278112  
0.98549 0.278816456 0.3464893 0.727579114 0.2704442 1.391563 0.9191158  
0.259505939 0.304702803 1.90188 0.2622204 1.468054 0.2430879 0.3570091  
0.730350366 0.453321 6.034427 1.569443 0.50662784 0.810166 0.5525296  
0.337851523 0.8865459 1.127956193 0.1006949 0.370198 0.300068443



1.232773 1.153425 0.48352175 0.951163649 0.4456433 0.4775945 0.462496  
1.061569 0.7079767 1.126533 0.7017435 0.3220326 0.108936 0.508331881  
0.3822812 1.287960672 0.2777294 2.043591362 0.7569685 0.5156552  
0.243913973 0.173355 0.3709297 0.3249998 0.021247336 0.600746 0.5564007  
0.359081574 0.613419883 0.1814832 0.6020631 0.7912236 0.284245116  
0.431523016 0.600739636 0.3573476 0.2262879 0.05394943 0.3424501  
0.4842865 1.876418 0.773278 0.532609 0.5487113 2.290063 0.3715829  
1.191536542 0.3953224 0.08484287 1.137078 0.3703706 8.66762 1.879648  
0.3476035 0.5339161 0.2623259 0.2832596 0.610156734 0.3664885  
0.6672436 1.311164 1.141613 0.254735305 1.326515 0.4154735 1.063004  
0.3774251 0.5940724 1.097878 1.380639 0.192280444 1.605877 1.035567  
0.691356644 0.4331195 0.4997266 0.7521288 0.2825254 0.4393951  
0.432320778 0.162968669 0.1856626 0.7324072 0.4041897 1.776884506  
0.958016712 0.119917867 1.188708 0.7571112 0.3857607 0.05636884  
0.6689064 0.6897631 0.6125651 1.496708012 0.029632651 0.3217278  
1.009594697 7.093947 0.332333191 0.2988131 0.6614431 0.9493616  
0.1046321 0.5445483 0.4796973 0.6503779 0.449562 0.7265008  
0.896414763 0.2686739 0.1784751 0.6874395 0.727347 0.312161029  
0.7179052 0.547933 1.667707 0.530803061 0.5185202 0.1952656 0.4117429  
0.7190286 0.4776442 1.097173 0.02376718 0.165166461 0.235125533  
0.361540321 0.3296831 1.26993325 0.607004337 0.5107256 0.3166498  
0.389713851 1.223276 1.516825 0.1209003 0.528355383 0.1434624 2.576373  
0.3282911 0.174095527 0.7830426 0.2729629 1.415994 0.237324 0.9914818  
0.9222209 0.5640868 0.3166323 0.6770917 1.051959 0.5711039  
1.905523916 0.2765295 0.07129882 0.815296 0.2442376 0.5481802  
0.2747668 0.4632494 0.462390818 0.951657712 1.101903192 0.6234453  
0.4205885 0.7775942 0.2098675 0.8614613 0.162598932 1.530604  
0.7328562 0.5377071 1.006731 0.04761884 1.128010914 0.9540056  
0.3232926 0.5056788 1.19691 0.4951971 0.3919081 0.313168 0.645041025  
1.293484 0.8524144 0.833434196 1.267762 1.168952 1.264295 0.304682 0.9872117  
1.008537465 0.648388402 0.152715867 0.2524909 0.6321179 0.9301564  
1.9088 0.9008485 1.058008 0.489669414 0.2036863 0.402461739 0.2957184  
1.355471 1.501611 0.8344192 0.0133529 1.743809182 0.6196053 0.6690258  
0.6118025 0.8886262 0.03588207 0.4103433 1.037052 0.932374445  
0.4452143 0.642811173 0.3747185 0.7521572 0.380227129 0.5677971  
0.1931343 0.2482855 0.300460332 0.5543343 0.3544199 0.9400656  
0.700651365 1.676571 0.9226852 0.8081571 0.1333239 0.8294069  
0.2364155 2.01599  
BHLHE40-AS1 0.3956488 0.934578388 0.637191 0.523273592 0.347668352 0.605210074  
1.101478 1.051840876 0.5170415 0.8764958 1.639519905 5.073552 0.7145458  
0.6607803 0.9385743 0.622358 0.5190277 0.291794979 0.4519728  
0.7004038 0.637389981 0.5965944 1.739830446 0.5390016 1.058243  
2.562467954 0.7107036 0.5148021 0.4373917 1.858618 0.288182 0.778953411  
0.598946 0.730121233 0.6959264 1.946577318 1.414597937 4.199283747

1.968453 2.082881 4.198545947 2.71756 1.707426661 0.3194343 0.822562105  
0.9041369 0.9711099 0.2715986 0.412022956 0.2956969 0.9816  
0.5020826 0.361756147 0.8633536 0.882509978 0.9497077 1.096194  
0.4223419 0.4982509 0.289639 0.5252903 0.4255565 0.390897111  
0.5288161 0.9036697 0.7162818 0.6101478 0.8525494 1.017469  
0.2088445 0.8985503 0.983627619 0.305183 0.493053 1.375276734 0.6617893  
0.248806472 0.3313896 0.991554 0.2561484 0.6194889 0.7403186  
3.658143 0.77151618 0.697847868 0.647517 2.219904 0.2906469 1.391533826  
0.7426171 0.499035 0.5523701 0.524802719 0.6080978 0.6035764  
0.276359468 1.265285 0.67393865 0.463984349 0.9370857 0.934593558 1.33691  
1.350881 0.205998174 0.9329319 0.8538402 1.971281464 0.4863962  
2.42019271 1.620080073 0.3597758 3.039003472 0.7662476 0.5656182  
0.3158175 0.9745426 0.9023509 2.580830346 0.6609034 0.3823245  
0.7802998 0.4318973 0.9389217 1.352098 0.5120512 0.7369232  
0.4823008 0.8826648 1.548296 1.941980752 0.609577353 0.5110899  
0.770618627 1.304254208 0.4889322 1.12204573 0.5977767 0.4249997  
1.315708879 1.462802384 4.216582804 4.287610254 0.1506868 0.4905061  
0.4958144 0.8737503 0.6739183 0.3387636 0.559675093 0.9346884  
0.5435669 0.985561529 2.271252 0.6486927 0.743508214 2.90344 1.06836  
1.514175938 0.7605497 0.7326467 0.427357456 1.071417 0.5220971  
0.7965172 1.43832979 0.5406309 1.487229 0.56003123 0.8145517  
1.586751788 2.175342 0.6891144 0.570490405 1.46277 0.624444545 0.8217017  
1.081713 0.5337116 0.9717646 1.987648 1.005275975 0.749417 0.7180823  
0.9910131 1.196404 0.113605 0.8645549 0.5983541 1.065719 0.580311687  
0.320403641 1.176612 4.243912 0.8715377 0.6298389 0.669888812 0.6092062  
0.923444129 0.5130871 0.5562059 0.868679153 0.770860599 0.412741  
0.9025884 1.756181391 0.6581901 0.9108549 0.890327 0.3979666  
0.8424912 0.5446043 1.611819 0.4988394 0.769674 1.759398 3.087643  
2.916701 0.7438686 1.2788535 0.6694329 0.5989506 1.144142509  
0.5029575 0.5529952 1.009611 2.995597 0.3345655 0.531757263 0.6237673  
0.6866444 0.3773023 0.175723 0.4630376 0.444766017 1.342519 1.047548  
1.01259 1.191098096 1.045556024 0.672522 0.7165732 1.234074 0.695835607  
3.480679 1.38701 0.808118331 0.509143 0.7839319 0.4367429 0.2239478  
0.7386807 0.9631902 4.522743519 1.286885 1.336310193 0.6106643  
2.472762 1.008592 0.4652186 0.4932866 0.8532605 0.4518975 0.805550422  
0.9163063 1.012779 0.366985494 0.3212738 0.6555453 1.429282 0.4268667  
0.3673565 0.5376511 0.8606908 0.8099371 1.556196989 0.7525972  
0.883323286 0.9430511 0.8524271 0.6408674 1.407635857 0.59028458  
1.148388 0.7619784 0.5990652 0.4109858 0.7201939 0.466263657  
0.4701447 2.559259 1.832967 1.454350081 0.791476 0.5060008 3.029550172  
0.666566 0.51891763 0.3952084 0.9305363 0.648245025 0.4342156  
0.6660892 0.17030928 0.741841632 0.2354512 0.4415815 0.4163088  
0.6465581 0.7799392 7.815136 0.708562 0.4051017 0.7213595 1.573065199  
1.561936 0.689094932 0.3633452 0.225702347 1.041105 0.4070962 0.800064988

0.7693594 0.391954 0.2518419 1.968260331 1.426585 1.010518 0.566402039  
1.522261156 0.3602945 0.7200269 1.018148 0.413824064 0.858030289  
4.889391753 0.2323705 0.2391139 0.8171045 1.484875 1.037118 0.4436343  
2.880304 1.594592 0.3560251 0.7105949 0.2931744 0.476921601 0.4177294  
0.4482589 0.8178818 0.4803095 3.162561 2.719823 0.3932769 0.7467069  
1.52457 0.7117042 1.302123003 0.8003398 1.310694 0.6717484 0.6859464  
5.742373195 0.6109982 1.818808 3.326563 0.4985221 0.5056831 0.5317154  
0.5758793 1.446880265 0.3848157 0.4814759 0.815027398 0.6407363  
0.7920768 0.8355165 0.9287879 1.378831 0.466053573 0.22960768  
1.866739 0.875546 3.281921 0.666506865 1.497385938 0.481516357 2.464317  
0.3555664 0.679376 0.4169468 0.7600216 0.3550852 0.9138146  
5.311844579 2.932912618 0.5180394 0.552324569 0.6325766 0.659773733  
0.4999374 1.831689 0.4963609 0.7186575 0.676957 0.4038609 4.643523  
0.450041 0.4109797 4.104636022 1.755989 1.264259 1.988962 1.280955 0.786575798  
0.8198969 0.2171212 0.4723935 1.983885395 0.7775103 0.5237692  
0.6312934 1.312959 1.004007 1.474102 0.4102003 1.527121077 0.627046751  
1.103649402 0.4586867 0.394680374 1.238800588 0.6257085 1.141064  
1.848210612 0.2283245 0.385859 0.3779358 7.515612625 0.5726881  
1.602375 0.9554928 0.682197198 0.3830674 0.234353 0.7770017 0.9613062  
0.5893195 0.4060386 1.207402 0.2036568 0.8830568 0.11579 1.444681  
0.789253777 0.1412315 0.7534005 0.4864292 1.780097 0.8614504  
0.5806813 0.5241181 0.529315805 1.983262378 0.401057073 0.4273182  
0.9876168 0.6511334 0.2956838 0.6332446 1.195546502 0.7587611  
0.3640317 1.081655 2.763775 0.4137249 0.798997275 0.1386775 0.3795744  
0.5254351 0.1324977 0.2869518 4.488873 0.3703135 3.180809588  
1.518665 0.8375203 0.593361498 0.4506744 0.3002244 0.7375587  
1.012514 0.3990256 0.729844079 0.80278932 0.170336929 0.1016389  
1.182822 0.5840288 1.997361 2.779849 1.235389 1.154253439 0.6065608  
0.600385885 1.166591 0.4845591 0.70521 0.9190354 0.6067191 0.531821335  
0.3600985 0.611413 0.9126771 0.7967219 0.6382506 0.5271236  
0.4515234 1.803713353 0.6214574 0.494417022 0.4619505 0.7616734  
0.473892548 0.8482476 0.9387733 0.3410658 0.837020336 1.142935  
0.6449869 1.049576 1.018792035 1.0998 0.6292444 0.1048727 0.5106926  
1.412006 0.8937844 0.1497459  
AC020916.1 4.91008 54.304628837 16.44301 16.947857908 4.919076952 3.470203977  
15.22166 9.400346081 1.90772 1.470261 2.475290448 11.47765 16.03219 16.8417  
2.724131 24.78276 6.399152 2.493721997 6.070295 25.06976 3.388559517 24.43765  
23.056771718 11.52487 6.372575 7.28459276 6.523329 0.9318092 0.3349474  
13.30138 3.866786 12.195309428 15.94964 14.998111014 8.183621 12.429041771  
10.174126462 10.812351167 39.98551 9.866965 9.111738207 6.595625 1.52466907  
2.461229 6.099650973 6.666884 10.47947 9.428688 5.397059443 3.456186 27.31668  
24.71821 45.53896087 4.757496 5.343135584 13.23394 3.47513 9.219817 1.935511  
7.366474 2.607746 13.20689 8.467118496 6.120661 4.580049 8.350888 0.594012  
13.60204 19.78624 2.922853 18.16284 98.606157512 2.328053 0.4099352

29.447299451 4.743529 0.811524762 7.788197 15.23611 8.94765 5.502975 7.582606  
6.256194 3.822916652 50.220278611 1.695142 0.8187909 14.6646 15.287285143  
14.13586 5.875117 2.057818 20.285638136 14.32022 7.756705 4.890039226 1.833433  
47.639180749 1.116693528 4.31702 2.186305329 1.217165 3.872395 10.615647804  
21.5634 6.619666 1.631972862 4.871378 22.274875085 9.111384865 1.051178  
15.41498949 6.474468 15.21117 90.33382 4.48904 27.64022 2.851958777 8.316601  
27.89847 11.48997 6.589677 32.43014 5.724792 18.37485 3.54912 10.01401 5.910459  
7.638384 17.169671421 18.81993751 3.200654 50.54787269 10.944338626 3.206956  
6.468880968 15.73056 0.590831 15.082691284 23.287149583 1.644102634  
30.944986676 6.943678 29.64661 10.10612 12.15967 31.01322 66.39184 13.218617096  
10.27488 11.08222 9.463617749 5.351654 6.505491 14.276023976 34.78556 10.77648  
6.53081143 11.94322 11.20837 1.516586051 31.74234 26.58759 7.866917 7.522092632  
15.76015 8.703348 6.584558595 1.109654 9.481268372 6.806005 3.189471 3.66376881  
11.75133 14.829495734 10.24385 45.41397 2.660947 7.750984 4.466065 18.199424071  
3.387809 1.08441 35.59397 16.80896 0.9502732 0.5188087 8.919105 30.869  
9.531779342 0.457261509 13.15188 3.875865 25.61254 8.042546 15.187290622  
4.599493 13.919853127 11.27571 5.843507 2.183592753 48.889972215 21.89041  
1.250236 14.505593432 2.640685 4.44832 9.658801 15.73717 3.487383 43.88987  
6.047692 2.223803 0.5791828 9.183317 26.68639 1.090191 6.109873 21.768503944  
33.85777 108.6546 2.111504436 4.396421 7.87601 17.36008 8.208232 1.428535  
15.014107614 9.22156 3.131556 4.380208 0.3792308 8.643884 1.659798524  
4.514095 9.310948 1.89917 17.172475523 2.696992314 12.65254 4.567681 21.59402  
87.267154071 5.746557 17.16403 5.387056808 5.571371 13.13205 2.034192 23.5946  
1.541906 8.242334 15.667466414 7.122741 2.329832798 20.14114 17.75177 12.53507  
1.301111 83.16684 3.18365 12.65743 22.70108295 18.29485 54.57602 1.141158013  
147.5824 1.551654 4.7983 7.282485 4.89383 1.211646 8.731794 17.29911 16.19800053  
11.22539 9.670507082 10.51892 5.66282 10.78673 16.547146033 17.764200419  
5.393756 3.017752 8.363814 30.23994 8.193902 1.268168086 5.733293 6.488505  
1.301167 13.678908847 4.040662 1.331366 3.538823304 2.096964 1.58951432  
1.940026 42.91876 4.834654037 20.81797 79.92703 18.91090623 8.283120325  
1.150515 1.425085 8.492158 28.76489 7.662864 8.763472 9.230597 16.31345 3.502484  
18.892083943 0.5877411 0.85311105 3.028576 1.27060126 7.233688 1.928039  
14.42462757 10.87613 1.943841 2.302588 4.951611478 1.808563 2.035428 1.406501104  
11.055562125 5.037539 2.5832 4.791907 15.814315109 15.544291746 11.643527108  
1.201132 6.73621 0.1455175 1.274053 13.36569 4.069801 2.044043 1.580263  
38.06029 1.698668 7.160205 4.178102063 18.42416 1.611077 18.36346 32.10418  
13.93156 3.398246 3.704897 7.547969 1.297212 10.126 19.245854303 22.65705  
0.9137204 22.92357 2.040768 31.99753563 3.880755 52.76681 13.12311 2.383879  
25.07737 1.471396 8.610911 23.140637126 1.796517 1.549312 4.231936815 1.542091  
15.9278 8.052429 14.55523 6.945861 5.067218674 8.659616752 5.854651 46.49052  
9.175051 0.622439008 11.488268822 12.381810393 2.812379 3.067766 24.21551  
5.088384 18.4265 4.417481 1.895249 15.831414957 7.241474888 1.673604  
11.008575628 9.325023 3.944161782 5.89378 7.037994 2.880796 80.92763 14.68231  
8.318732 4.769692 16.23609 0.676948 6.7595917 89.65254 0.7595419 2.401665

6.047172 8.173781295 5.134398 1.170033 9.669765 40.971398682 3.412587 3.929909  
24.91645 2.909147 123.8642 3.142455 14.3087 11.182113913 26.763355976 18.38540547  
3.832678 4.281729567 4.565092072 48.41884 0.7095582 7.861271836 2.94984  
3.682191 2.372404 10.502111389 2.73452 0.1377326 2.274331 4.519773556  
2.546249 2.457272 1.72876 10.33814 0.8245814 13.29431 4.150986 4.70099  
40.68241 7.669965 43.25122 2.198674556 2.133221 10.61573 7.952639 33.12147  
2.039714 5.281505 3.937881 0.838398308 1.625703887 2.278653812 5.462977  
14.82349 2.271524 17.11162 15.40994 12.466555923 3.119304 17.98316 21.43946  
7.778964 3.60494 1.417640436 3.161401 83.77161 5.203524 8.873535 6.790488  
24.12518 21.359 55.026144546 3.885177 66.81027 10.943539372 0.7788925  
4.992263 19.94953 7.682202 10.54644 14.363301769 8.490086914 15.1586424  
0.4864588 8.993917 5.134166 4.374427 6.000682 2.275189 31.343184573 5.174366  
1.328211815 1.308129 15.44295 3.287189 4.444188 1.527108 9.06296956 10.7629  
1.746033 2.931552 15.51439 2.855143 34.22017 21.62417 9.363122332 130.3348  
5.555399763 0.5474766 0.4437977 19.864781861 19.51891 16.26375 6.938081  
14.956115911 1.050289 9.974004 90.83309 6.212318555 2.182275 3.071228 0.6118842  
7.866552 1.77907 9.335665 2.241672

LENG8-AS1 1.127369 3.323787609 1.190914 2.898284815 3.081676393 2.602517942  
2.894148 1.223038935 1.125643 1.075258 2.311834896 5.442233 2.236922 4.193578  
3.468657 6.265082 2.641297 1.880375476 1.097519 2.541396 2.788645007 2.610405  
5.181860458 8.340709 7.260725 2.074887246 2.304661 1.752472 0.8842212  
3.340091 1.350266 1.896835701 2.755132 4.948860824 1.97732 6.140974558  
4.668821549 5.719389807 2.267244 6.261446 2.588067657 6.238414 1.300366793  
3.327389 2.988938202 5.984514 8.670107 2.421485 1.912044032 0.7623435  
4.857877 17.28274 2.923108513 3.429772 1.666125406 8.033106 1.53968 5.452089  
0.5423668 2.178326 2.720981 6.534066 6.017895918 1.447319 1.151944 5.203321  
0.9679396 4.613662 6.493452 0.5957769 3.015837 5.737272779 0.817734  
0.5827123 3.228922807 2.313466 1.243840377 5.883654 1.167819 2.187729  
1.416113 1.450562 4.632297 0.804540638 7.482419342 1.737535 1.086298 4.309949  
1.891830359 1.713987 0.8889061 1.310894 7.49451343 4.976285 3.667355  
1.331327438 1.665975 6.433198022 1.062607013 1.230545 1.128833786 0.6953015  
3.255524 0.685903234 4.594678 1.484223 3.214590501 5.377678 8.776113518  
1.88949071 0.9640146 7.028867984 2.516414 11.74462 4.167036 2.025221  
2.965751 2.951586498 10.11078 5.382545 0.999281 1.392561 1.373911 5.194014  
5.549917 2.203556 2.97683 4.67002 5.4775 6.170958511 4.468223922 1.842112  
9.164216044 3.865945203 0.9718855 4.4842591 2.573242 0.5409211  
1.01266945 4.676875266 0.554554175 2.433992011 1.554709 4.675199 10.95506  
3.639839 7.349723 4.258115 3.217160127 2.57673 5.242547 2.742699897 5.723541  
1.973292 1.142597182 4.134725 1.363033 2.365192609 4.003215 5.967932 1.599821758  
4.282538 5.633098 2.790097 4.353359448 5.316331 3.350933 0.972924626 1.689346  
1.994846842 3.504856 1.285937 2.611033558 2.841255 7.629013481 5.289797  
12.91968 1.124852 2.103727 1.606533 2.623477626 0.9736629 0.9292491  
8.489058 4.844687 1.369814 0.3742402 4.286682 2.564386 5.014872496 0.665838816  
7.504989 2.050025 1.962279 2.461573 3.978366739 2.671265 5.665714498 3.545931

8.178931 0.746297972 2.409762939 0.8405991 2.06615 1.755469579 2.632239  
3.055577 2.449816 5.271509 3.202368 6.134444 2.5665 0.8532974 0.90078  
4.810926 11.24846 1.675669 0.6921902 4.505960379 9.111602 2.567809 1.918452203  
1.255221 2.161777 4.053062 4.790106 1.324322 6.346809669 8.776926 1.483809  
3.499243 0.1217248 5.610964 0.681896255 1.058247 4.327291 1.532536 5.211173473  
2.276262594 9.020969 1.15355 4.150924 3.130777012 2.806566 3.187393 1.177113009  
5.04635 7.558177 0.6121754 3.514917 1.724891 1.730812 4.646447133 2.288481  
1.006347332 1.930691 10.45015 3.977617 1.356298 3.440947 1.887262 1.984312  
4.831299485 7.806033 10.21107 0.823168852 4.979063 0.4990128 2.583794  
2.214216 3.063254 1.555108 2.45842 13.05082 5.723367687 1.298965 0.94966341  
9.601876 6.019767 1.69728 4.828973008 2.720403788 2.166785 3.250755 4.406873  
0.559219 1.879018 1.505140621 1.824999 6.358686 1.051471 3.43818843 1.312845  
0.6637882 2.428815413 0.4445024 1.623982454 1.566372 8.051806 4.356570617  
4.415498 2.540302 6.67399489 3.560058771 1.049603 1.17881 4.400342 3.086568  
4.28541 6.435099 7.686087 4.045166 0.6348667 2.700774964 0.3517722  
1.100159201 1.429944 1.606921915 2.142188 0.9135525 2.431517418 5.264158  
0.7585036 0.6313537 1.270856302 1.277983 1.133324 0.69436949 4.42591293  
1.821812 1.997027 3.28444 4.562771841 6.148399901 8.275487616 1.601985  
2.287357 0.2689042 1.457883 2.094493 1.586719 1.319359 1.097626 5.868586  
0.8780408 1.789422 1.266723644 1.82969 3.200942 3.763117 3.498489 10.29365  
2.921685 1.655852 1.252347 5.140718 2.678937 5.119208092 7.475485 1.731773  
2.947755 1.124313 8.159113416 1.349756 7.934564 6.374812 1.169738 7.200232  
1.762692 1.030851 4.115078832 0.9790875 1.482322 1.049482371 1.843309  
5.460654 5.368236 2.611813 3.328559 2.621983947 2.149462726 3.378077 8.203195  
3.213625 1.150215417 3.458897076 3.494337449 3.385695 2.270686 1.97656  
1.613739 4.897706 1.532538 0.8980159 9.109087746 4.908192735 1.092571  
3.920338 7.84988 1.922899016 8.120077 3.585467 1.854115 7.441771 4.413187  
2.135294 5.418604 0.9616327 1.131083 4.363463753 7.439843 0.6842974  
1.744606 3.084025 10.348299741 2.293788 0.7352972 2.781259 1.61682981  
2.317529 2.476386 1.541532 0.7109777 4.796961 1.682684 2.36929 7.108460762  
9.143815585 5.932911434 1.301971 1.489370245 1.026766033 3.133105 0.7844812  
5.603307622 4.137 1.453928 1.019806 6.950003128 1.479035 0.6763425  
0.4769856 1.585326002 1.36771 2.171646 0.9486661 1.440726 1.473071  
7.287922 1.929869 1.847408 5.571006 3.84429 3.772237 0.920019248 1.85544  
4.847748 1.696947 1.944914 2.069461 1.497069 0.9903442 1.585732507 1.08247252  
1.563192714 1.24041 2.65182 1.485075 3.586486 2.97745 4.535425568 1.188199  
10.56223 1.365265 0.6811662 0.9494007 0.760430012 2.101775 8.043286  
3.877681 2.202774 2.988846 10.30692 7.581742 3.26458984 1.934775 2.115776  
1.22380809 0.5130814 4.537945 3.696201 6.714563 5.671449 5.483922464  
6.041753786 2.40068609 0.3595741 6.422607 1.23013 1.207301 2.943387  
1.000244 2.628441829 2.626867 0.490158789 0.6047062 3.645699 2.019255  
5.504785 0.8089098 3.196233739 1.401634 2.093705 2.55271 2.440732 1.774739  
3.849986 5.13592 3.959832887 2.01048 1.629670124 1.544475 0.6668954  
3.969815899 13.3173 3.050872 1.294665 6.692103863 1.513694 7.881584 8.337582

0.991898456 1.792819 1.731214 0.3261666 1.086261 2.528903 5.317832 1.451267  
AL031600.1 1.220305 0.238044012 0.2292285 1.027052678 0.789151973 0.47683218  
0.2413966 0.370335642 0 0.06631688 0.250303929 2.090902 0.4723652  
1.456002 7.235519 1.242411 0.5566572 0.27817788 0.1657234 0.3400417  
0.321350782 1.031562 0.748690926 1.687639 0.5350008 0.642864768 0.6396332  
0.490778 0.08935288 0.9986973 1.104907 0.275037871 0.483504 1.291637151  
0.1405614 2.190800676 0.970980024 1.450477236 0.8895158 1.154465  
1.030273823 1.149119 0.143793883 0 0.394908713 0.7646276 1.52883 0.43154  
0.103367163 0 1.688285 6.754312 1.757531947 0.1697039 0.295778735  
2.523212 0.1685545 1.105822 0.04318174 0.7530613 0.08634081 0.9074806  
1.153456712 0.07201972 0.05667753 1.393582 0.1578186 1.068204 2.106258  
0.1029819 0.3123086 1.406587495 0.1119004 0 0.334201235 0.3064399  
0.505138571 1.22557 0.1033094 0.610487 0.2952897 0.0882213 1.301685 0  
0.873182145 0.1794475 0.1941567 0.914898 0.755655711 0.2129208  
0.07208283 0.1423224 1.459243115 1.274561 1.020044 0.280279461 0.5056089  
1.153183911 0.201059884 0.1063518 0.183077916 0.07080671 0.6198161 0  
0.9490496 0.4732525 0.036279697 0.9546717 3.100367703 0.551598692  
0.02638356 2.033111095 0.495247 1.2176 0.6386531 0.1759591 0.5549943  
1.712930858 0.5960039 1.113697 0.02430999 0.1042385 0.2201079  
1.097518 1.181021 1.904458 1.422041 0.9539965 1.845053 0.60776805 1.191526379  
0.08120651 0.631962515 1.138313883 0.05066471 2.406788091 0.3885549  
0.1246666 0 0.478127408 0.303545443 1.208675794 0.7182739 0.8839079  
1.307403 1.681969 1.272815 1.06636 0.936064776 0.7645272 2.173099 2.124242183  
2.458721 0.5294695 0.26059234 1.438538 0.02737912 1.035705395 0.4588971  
0.4316304 0.248423237 0.648519 1.500517 0.1947042 2.926357967 1.042385  
1.362102 0.0808934 0.02043524 0.390604157 1.490364 0.3609647 0.710735963  
0.5702448 1.29566121 0.8844338 4.296805 0 0.3903437 0.1418332  
0.552901786 0.2304659 0.2154247 1.481986 1.5968 2.249379 0.02409968  
1.525571 0.7723864 1.326624097 0.034710394 1.377531 0.3740397 0.8876772  
0.2170288 1.042656872 0.9406944 1.684880516 0.7394022 0.7442101  
0.22281815 0.753730363 0.1586612 0.6010619 0.684022402 0.1364075  
0.1365328 0.8841441 1.142755 0.9985418 0.8182876 1.989127 0.1698429  
0.1696545 1.878567 3.254179 0.137926 0.05718989 0.695142882 3.824285  
0.7906149 0.372616183 0.7016871 1.577718 1.29698 0.3188861 0.1449784  
1.013883849 1.439699 0.1212224 1.151024 0 0.4580869 0.179159269  
0.07355566 0.7682019 0.1806779 1.719647877 0.174870774 2.399096  
0.09621594 1.176484 0.694952006 1.099614 1.101902 0.554249023 1.149591  
1.167732 0 1.71294 0.2839552 0.4372578 1.62644815 0.364405 0  
0.1297824 3.393732 1.024575 0.1542638 0.6718094 0.3677795 0.03650923  
1.907508753 2.088913 2.624705 0.053009016 1.245889 0.08740604 0.8516138  
0.619266 0.6938186 0.2562803 0.3938521 3.729384 1.152290845 0.4201436  
0.077972364 1.362185 1.345947 0.2834352 1.829926614 0.292331411 1.459729  
0.7704449 2.224318 0 0.3541906 0.191596848 0.02114173 2.48118  
0.1109479 0.467830813 0.2053171 0.2164559 0.259982674 0 0.309188421

0.1207581 1.695117 1.544983976 0.7073866 0.8331626 0 0.950567682  
0.05344369 0.100232 2.041924 1.113949 1.365689 2.247738 0.7658237 1.081352  
0.1463183 1.127789697 0.0320915 0.082117146 1.032506 0.319846659  
0.7564942 0.02985372 0.153569521 0.814951 0.2372462 0.1091315  
0.178365797 0.2602893 0.02919274 0 1.498035925 1.939004 0.3056004  
0.2302599 1.368066756 1.963173302 2.233351225 0.1384541 0.103616  
0.04528912 0.2180867 0.06504732 0.2373594 0.06491465 0.2235556  
1.018232 0.02288628 0.02495472 0.454665259 0.3792717 0.1424467  
0.9444989 0.3391815 3.656776 1.194098 0.2122211 0.1845564 0.8319258  
0.8560404 1.747541778 2.789428 0.2585231 0.7504689 0.1879125  
1.776546707 0.04282978 3.753527 2.310993 0.132016 1.773184 0.115205 0.2033352  
0.322828746 0.1325991 0.1622752 0.071066413 0.2545147 2.377208  
1.327543 0.2371726 0.4247486 0.241947944 0.848209037 1.416899 1.565038  
3.285917 0.038744098 1.977064971 0.60400736 0.5702223 0.2824777  
0.235517 0.1892806 0.3985047 0.05938851 0.06049791 2.290232487  
2.288576417 0.03858314 1.478666186 5.276743 0.202898159 1.630498 1.838116  
0.199241 1.976308 0.609512 0.8053865 1.682194 0.07945168 0.9979827  
1.537751321 1.9046 0.1664724 0.3847249 0.4310037 1.048203877 0.21915  
1.648245 1.233563 0.297063468 0.5223408 0.1260926 0.08132879 0.1588436  
0.8019394 0.4747671 0 0.762590938 1.21248757 2.063824381 0.05535206  
0.344906794 0.119897451 1.081172 0.04089526 1.659140791 1.702736 0.09432108  
0.1776121 1.63768778 0.02676288 0.2727852 0.08702896 0.10961146  
0.2921527 0.1718589 0.2252255 0.6308862 0.1040404 3.053711  
0.2185551 0.2773612 0.9831796 2.428503 1.067814 0.177737465 1.601761  
1.03746 0.1955484 0.5677783 0.3303877 0.0971198 0.09427533  
0.043129436 0.159778321 0.215837704 0.02829005 0.5492247 0.07389848  
0.2013466 0.7546164 2.218084778 0.1269039 1.735218 0.06018547  
0.1988527 0.2398486 0.062435306 2.466148 1.206203 0.4032788 0.8038193  
2.869705 3.411816 2.10317 1.480086239 0.241299 0.9415519 0.148860867  
0.07883357 1.758171 1.149787 1.556876 0.7608089 1.323838125 0.791716364  
0.213668253 0.06055985 3.161768 0.09053238 0.4444578 0.4931991  
0.1216671 0.948610585 0.2798006 0 0.06619942 0.7812328 2.484588  
1.134099 0.08967527 1.749517415 0.2080569 0.1821501 0.3927469  
0.5425297 0.03012206 1.702099 0.8705777 1.107826932 0.3875881  
0.308356036 0.2359247 0 1.20310329 3.024267 0.4863934 0.04168582  
1.07770377 0.06809986 1.355397 1.191185 0.30162994 0.2582454 0.2307229  
0.04760888 0.05596095 0.4973323 2.116955 0.6447126  
AC007878.1 0.09788543 0.228042163 0.2932776 0.647302108 0.194966958  
0.429148962 0.2662463 0.422283175 0.01976924 0.03510894 0.068710882  
0.3734284 0.3334342 1.059229 0.7017836 0.4474469 0.1855524  
0.24545107 0.5264154 0.4582381 0.299010888 0.6002414 0.325223208  
0.4445054 0.2697483 0.272272137 0.7692321 0.06298755 0.1261452  
0.6367406 0.389967 0.47565373 0.7638551 0.316577733 0.6449288  
0.818707519 0.161830004 0.639916428 0.4658565 0.448204 0.32726345



0.8664478 0.111651721 0.115748 0.368360228 0.4170696 0.3747132  
0.1305499 0.164171376 0.0523649 0.6724764 0.3566427 0.667120894  
0.2845035 0.208784989 0.3143102 0.1388096 0.2101562 0.06096246  
0.162425 0.1218929 0.2543458 0.172235618 0.5592119 0.1400268  
0.5533341 0.1909738 0.1803106 1.124859 0.3876967 0.7873326  
1.930610287 0.1184828 0.1184985 0.372006805 0.3053796 0.062011896  
0.6440251 0.2916973 0.06629723 0.3995096 0.2646639 0.7369832  
0.403568177 0.366883254 0.07600131 0.05139443 0.08303276 0.563037588  
0.4133168 0.2120083 0.07534715 1.313844342 0.536912 0.2953974  
0.089029946 1.962952 0.319790496 0.375086507 0.06255988 0.086154313  
0.2124201 0.1458391 0 0.5072232 0.2783838 0.153655189 0.3128756  
2.150323427 0.274324483 0.121054 0.358784311 0.251265 0.3171898 0.2093065  
0.08694449 0.2154684 0.700744442 0.1803037 0.2001081 0.06863998  
0.03679006 0.3107405 0.4368095 0.1852583 1.717747 0.1840289  
0.5957082 0.3756895 0.429012741 1.468196591 0.09553707 0.167284195  
0.267838561 0.2950474 0.835971214 0.3885549 0.02199998 0.122971483  
0.323439129 0.076524061 0.436286717 0.2865748 0.3320944 0.5679215  
0.1554762 0.5027086 2.021603 0.495563705 0.5303616 0.6981448  
0.461373868 0.3919023 0.5008159 0.303513431 0.8753784 0.396192  
0.045692885 0.4049092 0.08309463 0.122750305 0.5245374 0.3745911  
0.4810339 0.422969387 0.1430725 0.3605565 0.057101223 0.04327463  
0.538908409 0.3021765 0.1401392 0.141783645 0.2104112 0.902225135  
0.0891866 1.314317 0.2005927 0.1285838 0.1001175 0.097570903  
0.1931846 0.05913619 1.046107 0.9795496 0.1029128 0.02551731  
0.316039 0.8178209 0.727235738 0.04900291 0.3472767 0.330035 0.1127872  
0.02553281 0.804992438 0.1732225 0.550063933 0.3512997 0.4760756  
0.24903205 0.986500034 0.1343953 0.1339828 0.379373769 0.09628765  
0.04818803 0.1248203 0.7663184 0.8963892 2.091364 0.140409 0.07493071  
0.06736283 0.3315119 0.2871334 0.09735955 0.3128624 0.481252764  
1.255179 0.248036 0.131511594 0.03095678 0.2784208 0.144555 0.1000427  
0.2814286 0.389415596 0.3313885 0.2481494 0.2539023 0 0.08818785  
0.042155122 0.05192164 0.135565 0.1275373 0.52022961 0.18515729  
0.4671667 0.449951 0.3010415 0.702384648 0.8561009 0.1782489  
0.146712977 0.2704921 0.2001826 0.1711075 0.5169487 0.2705926  
0.3343736 1.451984854 0.5144541 0.240367745 0.2028531 0.6568514  
0.3616147 0.1701439 0.1863001 0.4734048 0.1675129 0.096176912  
0.4244849 0.1654226 0.009354532 0.4397255 0.06941068 0.3542427  
0.6307147 0.09328654 3.127051 0.2895971 1.028902 0.470236337 0.05703307  
0.348582334 0.544874 0.6811895 0.3556833 0.543339555 0.270836455  
25.27692 0.1553838 0.6153122 0.3457116 0.3750253 0.216391734  
0.1865447 30.11471 0.1468428 0.255180444 0.3079757 0.05456872  
0.066733521 0.1414377 0.272813313 0.07671692 0.8375872 0.260790134  
0.3421347 1.033175 0 0.469692266 0.1131749 0.123816 0.2740611  
0.6945803 0.6426774 0.4740567 0.1732633 0.2453487 0.2323879

0.419559283 0.05663205 0.096608407 0.082287 0.051312298 0.4592365  
0.07375625 0.225837531 0.06163495 0.07326722 0.025678 0.050362107  
0.0689001 0.09272987 0.074010729 0.627853292 0 0.09126529 0.4876093  
0.224580042 1.146559197 0.432261527 0.03257743 0.2194222 0.3196879  
0.1539435 0.2984524 0.2132427 0.06873316 0.08876473 0.5647336  
0.2907904 0.1937661 0.240705137 0.3095527 0.1106057 1.120632  
0.279326 34.89961 3.251157 0.3308152 0.2512449 0.5008827 0.1902312  
0.616779451 1.01346 0.1216579 0.8740756 0.2984493 0.452845239  
0.06046557 0.8206567 0.7671905 0.1304629 1.007195 0.04066059  
0.1722368 0.445400088 0.2651983 0.147275 0.242461881 0.06416337  
0.493538 0.5828237 0.251124 0.4970742 0.17854982 0.222111664 0.3200524  
0.8417014 0.3025397 0.082046326 0.425768727 0.042635814 0.2213804  
0.1993961 0.6338179 0.03340246 1.048472 0.4087327 0.1387893  
0.808317348 0.228272328 0.05447032 0.356407345 28.22836 0.125319451  
0.6086699 0.2567956 0.4043421 0.8990264 1.385638 0.263455 0.6770439  
0.01402088 0.1435008 0.438807636 0.5306934 0.3172767 0.1745811  
0.240855 0.811053679 0.3093883 0.1488156 0.6841611 0.174743216  
0.1667979 0.231417 0.2583385 0.3924371 0.8947635 0.214483 0.02816742  
0.293617901 0.318464587 0.642713475 0.1367522 0.276663203 0.084633495  
0.5263313 0.6783802 0.725788184 0.3779268 0.3245755 0.09850755  
0.782718424 0.09445721 0.06876939 0.1331031 0.064477329 0.02577818  
0.1920776 0.141318 0.3047005 0.4773617 0.2125201 0.5913843  
0.2447304 0.5421946 0.3603795 0.8383557 0.16728232 0.1310904  
0.1971644 0.1577534 0.1892594 0.1249365 0.1542491 0.1330946  
0.114166154 0.150379596 0.217651467 0.1397861 0.332304 0.07824545  
0.1243611 1.331676 0.469712071 0.2799351 0.5790245 0.3115483  
0.2280958 0.1034641 0.095489292 0.1704918 0.3937898 0.2696849  
0.3140974 0.1893153 2.038488 0.4241688 1.618114368 0.2554931  
0.6380399 0.210156518 0.1321622 0.288619 0.4214153 0.6201339  
0.2493407 0.619360655 0.55885861 0.196072044 0 0.5930753 0.4073957  
0.2394293 0.3365358 0.1975301 0.513365728 0.2194515 0 0.093458  
0.4795291 0.2321241 0.3845734 0.07912524 0.478859509 0.1101478  
0.2357237 0.3092215 0.2967957 0.01063131 0.3003704 0.8535076  
0.212498772 0.6253522 0.520836667 0.06476365 0 0.467953741 1.369042  
0.04577821 0.1324138 0.558409713 0.08812923 0.6650586 0.7882844  
0.191623727 0.218749 0.2210287 0.008401568 0.1185055 0.5967988  
0.513673 0.08939292  
LINC00342 0.531378 2.635812008 1.016884 4.799703098 4.415694135 2.232077296  
3.403112 1.947542844 0.634156 0.6280852 3.063944448 3.691271 1.401939  
4.735679 4.196904 5.172661 2.127686 1.580768647 0.944142 1.601849 1.532882732  
3.016862 5.642569856 9.01047 6.073716 2.566056845 2.192105 0.5925533  
0.745745 4.341782 1.222325 2.233605872 3.524044 8.225676239 2.491126 5.859478689  
4.809466562 5.910777843 3.054964 7.754273 2.574012035 5.760058 0.381949068  
1.254652 2.333766979 3.00416 6.851412 5.301825 0.984613683 0.5006968 5.15661

9.124495 3.739920166 3.805697 1.058988799 8.159649 1.712586 6.593212 0.3055545  
2.75087 0.8741265 6.79907 6.577794145 1.732682 0.3331808 3.428596  
1.207537 1.344879 7.283003 0.5605396 2.613024 7.417984981 0.4446312  
0.3435686 3.106439465 1.915232 0.631192515 4.820826 1.062789 4.099988  
1.403698 0.9411845 4.871062 0.928532608 7.604489269 1.164284 0.6023828  
1.895196 2.803000982 1.483451 0.4080472 0.5732581 6.71084389 4.507168  
2.505603 2.837588658 0.4639209 7.334982136 0.656631785 0.7641242  
0.511541236 0.4779047 4.24338 1.383334254 5.089011 1.298281 1.532394555  
5.141923 6.412716237 2.653029196 0.4710342 6.535323527 1.839796 8.767236  
19.28819 1.111002 2.235453 2.75470902 5.820843 4.920099 1.566685 0.6411385  
1.182092 2.547164 4.65702 0.8200761 2.203404 6.034166 9.100305 7.735944035  
8.488146284 1.320149 8.866152871 3.577758598 1.362316 4.907434702 2.192485  
0.210357 0.503428122 6.844545427 0.958289949 3.468888616 2.447766 3.308855  
6.366356 3.975931 6.895054 6.208929 3.260852083 1.940067 3.718352 3.495412613  
4.636572 2.798948 0.612760292 5.362261 1.979077 1.712370539 4.306235 2.52881  
1.097977568 5.271384 3.896469 1.033297 3.428402573 3.511447 4.246223 0.757332785  
0.5161109 1.724067449 5.633651 0.7780458 1.379239001 1.77204  
10.231692093 5.254191 10.29067 0.5597865 2.136006 0.4879104 2.762045019  
1.053734 0.4012813 8.537126 7.15188 0.5713664 0.2308709 6.079836  
3.919576 4.449321656 0.287176143 14.69612 1.676249 8.109532 1.03955 4.554405267  
2.092636 6.405908641 2.74294 6.754708 0.69939196 5.12827429 1.257411  
0.8609558 2.687790742 2.583823 0.8085576 2.155988 6.036001 1.682533  
4.767327 4.292902 0.5916606 0.1431339 5.857581 14.31514 0.5885827  
0.9027396 4.144631651 6.915656 4.72416 1.150532364 1.387695 1.516454  
4.332348 2.646016 1.394129 6.635373851 6.855151 1.166569 4.213294 0.04973672  
3.264096 0.396572942 0.9608876 3.90263 1.247571 4.160085263 0.875689779  
4.41737 1.194063 5.590433 3.947746326 3.60526 3.738596 3.445214467 2.920085  
6.653893 0.4097952 4.13485 1.489951 1.951626 5.957479384 1.963653 0.50589239  
2.268606 9.557966 5.062064 0.7389105 4.61791 1.554382 4.014203 5.113159791  
5.554137 10.13321 0.305844608 4.634012 0.3710917 2.483254 1.999318 4.589365  
0.5659536 2.029436 5.815337 3.676970869 0.450339 1.256254515 5.101169  
4.373546 1.995306 3.990503505 4.773555321 5.859755 4.808659 4.404387 0.4265273  
1.945686 1.067907258 1.284251 8.163189 0.6824056 4.565078717 0.787879  
0.3029627 1.584921116 0.1433402 1.388424897 0.84134 5.339165 2.873848776  
3.017546 3.961363 2.38611888 3.319652484 0.2559908 0.7583443 3.838371  
3.055915 3.716783 4.971439 6.750743 6.104509 0.9716362 3.636739308 0.2445475  
0.846264554 2.625093 0.633073809 4.288958 0.6499855 2.490958639 3.751461  
0.6069353 0.8870582 0.885424712 1.090918 1.233053 0.473680681 3.811966416  
0.1568048 1.2386 2.329256 3.221046545 3.638233835 7.63887684 1.155547  
1.466377 1.064934 0.9971342 1.048012 1.348345 1.045875 0.5171538 4.222723  
0.8819697 1.792965 1.11860158 2.487613 5.781008 5.56977 1.230796 11.99123  
1.337056 2.140855 1.76802 3.979527 1.518652 4.788810448 6.635906 0.9381091  
4.787464 0.9696372 6.675810435 1.370782 12.74302 4.369001 0.7473176  
7.093923 0.9970425 0.690625 3.62938519 0.4474841 0.6914805 0.778798854

1.322015 3.638241 4.892484 0.900797 3.348668 0.967354895 2.239929036 2.165614  
7.261126 2.752816 0.489258934 3.34148581 3.410403663 2.110563 1.402246  
3.550972 2.417702 4.211989 0.8792585 0.7046921 7.90894202 9.066470613  
0.9492515 4.554277526 10.5532 2.80515617 4.471604 3.234957 1.317651 7.38184  
6.237138 1.526841 3.810316 0.7870815 1.118611 3.134340258 11.01074 2.181945  
1.298336 3.980364 6.864112302 1.753493 1.602359 3.968951 2.441582568 3.460515  
2.31706 0.867652 0.4910924 4.71986 1.310706 3.640273 6.437588371 9.896442152  
5.506654052 0.6146235 1.495059207 0.365462819 2.540659 2.288291 4.53831838  
2.851147 1.298896 1.524715 4.977025744 0.5302485 0.7042164 0.6379243  
0.803454513 0.4770637 2.681602 0.5775454 2.060381 1.653598 6.002509  
1.808214 0.7850444 7.090779 3.701195 4.844294 0.42567376 1.026006 3.101499  
2.451131 3.014921 1.114964 1.459023 0.4926228 0.380306734 0.597185207  
1.087550672 0.6097813 3.749659 0.7347507 5.600288 5.367058 4.487525576  
1.139736 7.871927 1.083246 1.158139 1.247494 0.389684073 2.756652 9.651236  
2.721901 2.20638 3.999901 9.540089 10.3602 3.222494867 1.65198 5.198747  
1.173260173 0.4290979 1.762638 4.462715 3.133037 3.318835 4.651907948  
7.153571657 3.861208952 0.2043721 6.306239 1.867619 0.8505475 3.722542  
0.736416 3.111790566 1.671892 0.778861941 0.4035686 2.196414 1.972888  
2.880733 0.4685858 2.425392316 3.488013 1.586334 2.466641 2.309274 1.416588  
8.055853 2.174504 3.555076859 4.804032 1.563317655 0.599274 0.1202899  
3.490802105 13.69155 1.524949 1.824272 4.473163447 0.9242124 6.78734  
8.150042 2.331352878 1.169502 1.019028 0.3938917 0.5604646 3.479427  
5.340804 1.082847  
AC024075.1 3.387535 3.33710051 1.046957 3.676106916 1.565295946 2.414290404  
2.70908 2.319684789 0.4093246 1.246174 0.638748731 2.103914 3.477853  
4.125721 1.816315 2.488166 2.421357 2.178041092 5.247906 1.581313 1.890865241  
1.659017 1.442954616 2.971429 1.595764 2.281816702 3.660254 0.9315466  
2.705134 0.9080676 4.613895 2.182168602 2.956433 1.048765208 3.463062  
3.542762137 1.323390051 2.826571024 2.995534 4.489409 2.366233286 3.789738  
0.390297681 7.825555 2.414708695 4.31774 4.211749 0.0643584 1.726572389  
1.122944 3.172491 3.775449 2.700251239 0.5314901 1.132193326 4.183607  
1.466362 2.486463 1.915893 1.747029 1.937924 2.674927 1.667295839 1.691672  
1.745481 4.255403 1.294509 2.618197 4.137293 1.03925 2.980905 4.894718389  
2.131949 3.084432 1.154025398 2.070005 0.206351399 3.468708 3.100703 0.735371  
1.284456 1.611735 6.539713 0.451671937 1.606088561 0.8992096 0.329373  
3.684008 1.197915748 2.445079 2.834466 1.312442 3.513113892 2.747016 2.866988  
0.526678987 3.581727 0.515945706 2.878596776 1.147275 1.019334918 0.2587168  
1.15033 0.482393484 2.689222 0.4281808 2.310338976 2.728882 6.586201515  
1.989281995 1.239447 2.358309573 0.9370917 1.059267 0.3333629 0.6980355  
1.883016 2.72297825 0.9777458 4.756299 0.7359784 1.088204 1.199978  
2.291522 0.8767534 6.052875 1.360836 3.804965 1.55574 1.512998231 3.360715428  
1.384675 1.072079267 2.62046335 2.247899 5.224573137 1.352114 1.984733  
0.198400545 1.663813324 2.150312107 2.122125582 4.04265 0.982294 3.7009  
1.003373 1.929871 2.512725 2.003281484 2.614573 4.18822 2.558787076 1.697397

3.780761 0.979369013 2.433905 3.001173 0.81092318 1.580926 1.228918 2.282217868  
3.272289 1.719301 2.134258 5.440790087 1.843901 1.228069 1.182288153 0.5760044  
4.559649924 2.019327 1.20586 0.677457356 1.136502 4.13095429 0.92331  
6.055663 1.045388 0.7606697 0.1776811 1.026142509 2.285664 0.7496464  
2.546315 2.698935 8.566775 0.8805651 3.046769 1.798753 4.007477984 3.478668098  
1.643522 2.180186 0.7413568 0.6041829 3.787030968 1.110136 3.210067686  
3.265745 1.748076 1.027371234 2.131082872 0.8281765 0.693533 1.802225428  
1.352833 0.7696846 1.19991 4.127733 5.733386 4.772053 1.401679 0.9751971  
0.6641696 1.926121 3.860477 0.8063368 1.76126 4.102988312 2.822642  
0.5502448 0.707263485 0.7020083 6.588274 2.601086 1.44258 1.992789  
1.618806145 2.123779 3.619355 1.464472 0 2.695436 0.592275604 0.3071555  
0.4455384 1.535904 1.909220083 0.821508305 2.828415 2.059127 1.258902  
3.46261052 3.410083 1.222233 1.938348918 3.700379 1.846006 0.595429 1.52907  
2.460425 1.217274 5.626508307 2.060623 0.710977855 2.574255 3.771482 2.015806  
1.006529 0.4508611 2.168164 0.8003947 0.465511627 2.874603 1.223248  
0.553390825 1.68001 0.6843605 3.016411 2.549004 0.7588074 3.286986  
0.993647 2.824023 1.69163577 0.4386114 3.635854197 1.943484 5.48788  
2.367151 2.668443483 2.174415648 14.38174 1.608621 5.303153 0.9373576  
1.791911 1.160108385 2.913376 10.21707 1.824239 1.243186777 2.357763 0.7424743  
2.171283874 0.6275328 3.147096433 0.8572499 2.860898 3.085538948  
2.461602 2.374278 3.81371137 3.612157192 1.339029 1.961959 1.741372 2.480884  
2.085775 2.918867 3.197945 2.929721 0.4964371 1.52738967 0.5695359  
1.685958256 3.790003 2.155210503 3.790784 1.589465 0.961918979 0.8811578  
0.4953493 0.4557139 0.297929683 1.120889 1.249513 1.06720828 3.567609594  
1.908565 1.42338 3.402319 1.129275651 3.269387249 2.105889493 2.60172  
0.9374783 0.7564777 0.8279014 1.222318 3.874578 0.9487526 0.3209006  
4.555668 1.959166 2.136234 3.797204365 1.781744 1.130182 3.041962 1.357347  
10.67346 2.849338 3.600179 1.981736 1.6859 1.158459 3.051079478 1.45602  
0.8996226 1.932526 2.05981 1.373804943 0 2.67014 5.302888 1.571136  
3.210548 1.563496 1.846775 1.286799895 0.8767086 2.589525 1.978405647  
0.9489362 4.160498 3.076014 1.155456 2.987243 2.22732298 0.542721486  
1.982101 5.368303 3.430353 1.739226829 2.798601933 0.924817129 1.250103  
2.182218 2.120624 0.9880032 2.307028 1.983968 1.3263 4.815011066 1.662033519  
0.9264195 2.2966686 12.66998 0.847267036 2.258646 2.118799 4.341976  
2.246572 2.657504 5.147264 3.512272 0.6635525 1.582069 2.527564131 1.779022  
1.042739 1.00409 2.324736 6.481497346 1.658677 2.040825 4.558352 0.749459572  
0.9088348 1.316351 1.485814 0.8954588 3.105703 2.339402 0.1249736  
1.049419597 1.38353105 2.408017458 1.589091 2.062204955 1.345552439  
1.206537 2.348107 4.074023936 3.903349 2.067808 0.6092346 2.457656455  
0.6984817 1.26115 1.847373 0.114429546 0.9531081 2.840707 1.254003  
0.7972738 2.172271 1.032713 2.966105 0.651494 2.950889 1.69977 1.751751  
1.824575988 4.21677 0.2499376 4.899455 1.942855 1.601369 0.9631936  
0.9595881 0.315176647 1.056409779 2.317629352 2.687555 2.948741 1.542935  
0.6305909 4.879899 3.170567505 3.709499 3.392428 1.047183 0.5189838

0.9181018 0.847336299 2.601092 1.385145 1.551072 2.157819 3.835803 3.002077  
1.921165 2.675738859 1.791328 2.594958 0.901344371 1.7077 2.475728 2.816153  
3.320277 2.013994 4.017525615 3.925956147 0.446120528 0.34772 3.254582  
3.095262 1.489666 2.402765 1.879824 4.621436183 1.655231 0.290464467 0.03455464  
1.276549 6.217492 2.971481 0.2340426 2.571896536 0.9774103 1.996645  
0.9146388 1.812407 0.5345838 0.7615357 3.029483 1.583933155 2.91908  
1.080698354 0.4104917 0.04119817 2.742665383 5.868277 1.184805 1.523136  
2.944346167 1.919518 3.658228 2.580356 1.102109396 2.480291 1.066686 0.3479111  
1.548151 7.061026 3.259762 1.418216

AC009779.2 32.48246 4.311940682 3.870911 6.230338862 4.769365456 4.209704471  
4.171746 6.582889266 2.655078 3.078013 2.823363556 4.169445 3.230938 6.96032  
6.861635 5.097949 2.992884 6.021596851 2.487573 2.027011 4.97361851 3.050578  
3.821879794 3.770964 2.641636 3.368914326 5.053235 3.189918 8.459111 8.475297  
5.874375 7.061783172 3.87435 5.669001123 4.119823 5.175365831 5.540126262  
6.388432484 3.842379 4.719865 5.59582196 4.023327 3.419364716 22.86463  
3.119860938 3.885279 6.408089 5.941846 3.55230603 2.915678 4.38242 5.283527  
5.13478129 3.150635 5.984582904 3.635006 3.351232 3.774496 3.036188 12.08047  
4.791825 3.405411 9.059975436 4.110814 3.750026 4.610266 2.778582 7.37498 4.2366  
1.396644 4.300157 3.889316774 4.674344 3.010542 5.717176735 4.920203 5.292014857  
7.186388 2.581125 17.28851 2.196767 5.087856 5.323894 1.7944804 5.7486004  
7.527843 3.968911 5.369285 4.82009079 2.680876 7.668854 7.364666 4.99952826  
5.23766 5.992263 4.760671921 5.007285 3.188637426 6.750763273 4.355043  
3.652042839 2.838893 4.284591 2.258774893 4.991319 7.901316 4.141617854  
3.896754 4.955671626 3.575331153 6.513612 6.313258464 5.783244 4.626421  
4.811237 7.47881 4.877835 5.981984489 6.356549 4.991114 4.522872 3.345493  
3.632365 5.432975 3.835796 37.71434 8.322835 5.024514 7.119962 3.693456885  
3.170797849 4.415991 2.761551377 3.551049014 5.553632 3.018115285 4.809141  
3.484055 0.975916196 4.186514067 7.648137115 5.240983633 7.672929 4.651617  
6.624306 6.185204 4.141911 3.441995 4.871526299 3.748918 5.986765 4.808675533  
5.232057 3.480189 4.168935663 5.084747 5.234478 4.359625296 3.480367 5.316453  
5.083121616 4.472332 5.11763 6.691186 5.779709082 3.54565 6.187513 4.068775444  
4.116788 3.226120139 5.89962 6.715745 6.261903124 6.450416 4.329548361  
7.685932 3.979185 3.91276 4.522901 4.213123 6.236589101 4.085259 4.10347  
5.097856 5.061039 26.40903 4.826449 4.76853 4.811202 4.582477806 12.010806745  
5.013852 4.063113 2.482544 5.215159 3.560875534 6.090747 5.21621143 5.751563  
3.0132 3.850677494 4.006967462 4.274286 2.374257 4.310268871 3.650531  
3.376134 8.218925 2.681318 6.988349 2.975965 4.527745 2.34814 4.046049 4.372816  
4.016983 6.069319 2.112221 4.60464068 4.512653 4.129314 3.733204287 6.871598  
14.59995 4.678295 5.59837 3.607882 4.652805604 8.283181 4.788411 10.01687 5.11338  
6.004219 2.642071544 6.66818 7.198455 5.016267 4.183494752 4.835304135  
5.514446 2.821967 1.649768 3.918052985 4.420241 6.701233 6.009741745 5.171701  
5.73288 3.09784 3.618495 3.387391 3.497608 4.686207462 4.198359 3.544716301  
5.258364 4.18024 5.38586 2.338411 3.582518 4.050657 4.081292 3.640217044  
4.200724 5.128386 8.019680009 3.947366 2.900209 5.118029 4.060634 5.181144

8.575915 4.66727 4.284571 5.774929558 3.434118 4.825316784 6.062337 5.567414  
6.008511 4.10756718 2.497124087 11.67631 2.420178 5.687341 1.418703 3.142571  
4.768013028 3.315427 2.368555 4.3716 3.309564798 3.791537 4.507194 5.993703764  
2.91718 6.396697046 2.575838 5.033076 4.046453104 6.250842 4.136086 2.4050432  
5.947668391 5.362146 2.880368 4.010186 5.646944 4.955054 6.128537 6.313892  
5.766459 2.889863 6.080318113 4.753678 4.141139793 26.01034 10.853991227  
3.059948 3.82078 3.710465249 5.300086 3.91259 5.316663 3.10007913 3.238735  
3.62087 4.700745551 4.659950629 15.15441 6.546486 3.946051 6.120350867  
6.111472574 8.580076784 3.791896 3.233423 1.788967 3.038622 6.474981 2.488887  
4.936078 6.634048 2.796332 3.209313 3.499368 3.717668327 3.492592 3.128497  
3.072013 4.555328 2.653098 6.232928 3.227437 3.280577 5.064604 4.871791 4.99870363  
6.513896 4.51027 4.743088 4.216116 3.924626552 5.650681 3.805114 6.04661  
3.420889 3.710071 4.812384 4.521988 2.735898877 2.453038 4.157369 4.688019328  
5.385854 5.247475 4.041665 2.331732 3.673502 5.786447331 2.496673236 5.19392  
3.252944 14.70094 3.581211245 5.188759259 7.380358811 6.115367 5.567924  
4.070136 2.417493 5.85292 3.976314 5.23351 5.943150658 5.286501885 5.044686  
2.834966203 4.109183 6.451823984 3.121231 6.580053 3.876087 4.822758 4.503695  
11.56153 6.621524 5.523626 4.613758 3.644566541 2.534187 2.972276 3.321637  
2.043011 4.029038891 3.902708 10.97741 3.0087 4.331918237 3.596038 3.875053  
3.742646 2.798421 3.862604 4.98851 6.084298 4.477393211 4.243677184 5.275031131  
3.870041 4.446435909 4.522950625 6.096853 3.133886 4.310724793 5.484797  
3.176228 4.710651 5.067412291 4.038357 7.434958 2.727269 4.676147934 4.168946  
7.105405 4.349469 3.593822 5.178225 5.657471 4.594756 1.752969 4.696803 4.698311  
4.192152 2.925339423 15.29513 6.210162 3.983566 4.410807 3.188089 5.390048  
6.051457 5.281338416 5.554040601 4.238547374 3.374809 4.416471 3.716945  
5.786097 4.777581 4.165160956 5.990339 6.031775 3.906842 2.768848 5.526657  
2.893744476 12.70418 3.03745 3.957331 8.550278 18.95276 5.785495 8.367083  
3.978468208 8.610177 3.838243 2.834236634 3.238568 6.621937 5.720896 10.38441  
4.808439 6.165707419 4.912564378 2.160670232 4.880041 4.611438 3.915855  
5.932264 8.013545 5.315411 3.534774161 5.747256 3.265762661 1.647416 4.575257  
28.51943 3.996692 3.976194 2.721999389 5.444733 3.333738 1.921338 3.503885  
6.603682 3.986056 6.018027 7.287043823 5.555391 3.262602851 3.510259 3.304762  
3.695220296 4.427873 4.880114 4.429443 5.017874943 2.690015 3.525778 6.705061  
4.372693496 5.977763 3.085671 4.428814 3.846298 4.348125 5.884894 5.629986  
AC090589.3 1.101637 1.046848603 0.3983544 1.639117794 1.214661616 1.018045011  
1.348394 1.216420072 0.5006025 0.1975642 0.331412867 1.576011 0.8640826  
2.272059 1.974531 3.122151 0.9520067 1.215453175 0.7679863 0.9209239  
0.667232935 1.411975 2.97389427 2.926534 2.011246 1.191651764 1.105676  
0.04430527 0.2366139 0.8637716 1.215824 1.174421292 1.989129 1.995211859  
1.256237 1.876931098 1.821292379 2.688689511 1.852117 2.952031 1.38117719  
3.034318 0.314142036 1.605074 0.92436945 1.794707 1.771205 0.3060949  
0.333602211 0.3314999 1.844172 2.77268 1.185476154 0.800476 0.97905853  
2.505629 0.557933 1.914663 0.2144041 1.329446 0.3858261 2.06736 2.423001067  
0.5721427 0.3658367 1.245484 0.6492637 1.54502 4.100598 0.3067929

0.8860921 3.957558893 0.3333619 0.2667247 1.097731476 0.6265092  
0.370761457 2.001338 0.6668319 0.6994993 0.5864639 0.3504261  
2.235144 0.491016183 2.725162792 0.3563941 0.674813 1.090227 0.91714311  
0.7928889 0.4294831 0.5653224 2.92772129 1.428993 1.090854 1.33596621  
1.040034 1.063351516 0.456362904 0.4224427 0.181802112 0.3164098  
1.401965 0.458862094 2.746528 0.5326152 0.468349405 1.738035 2.577568481  
1.244897269 0.4715946 2.299351833 0.5532703 1.410634 0.8607034  
0.663985 1.12981 2.087583616 1.183701 1.930361 0.5069523 0.3105363  
0.8500101 1.831909 1.694032 1.807134 1.10617 1.96757 2.677824 2.228428551  
2.989195097 0.4300833 0.627558595 1.710064143 0.5534281 2.69351015  
0.9003101 0.2475956 0.157268725 2.532242718 0.538268114 1.527594684  
0.7132685 0.8494338 1.772668 1.948623 2.467703 2.027092 1.812606269  
1.387502 2.683611 1.866042282 1.693358 1.367028 0.750451459 2.536843 0.8428381  
0.707085456 1.777227 0.9741421 0.666068574 2.414999 1.744461 0.8942317  
2.573854917 2.242762 2.612997 0.267765609 0.2232212 1.833624835 1.322534  
0.4301391 1.166076424 1.106802 3.894670481 1.254672 4.669844 0.2418795  
0.9302964 0.2253516 1.18960576 0.6007571 0.4753855 5.058825  
2.642788 1.323676 0.1435904 1.910142 2.389512 2.074171711 0.10340553  
3.028991 0.7119135 2.785513 0.5387911 1.790363552 1.340286 2.572451502  
2.146268 3.094663 0.295020548 1.372209459 0.3781333 0.2827295 1.35851139  
1.083655 0.2982789 1.697434 1.861059 1.465819 1.793292 1.580212 0.6746374  
0.1474132 2.131973 3.19478 0.1369649 0.3407482 2.628444977 4.837751  
1.395743 0.437295838 0.6096976 1.127277 1.728553 1.794429 0.6478563  
2.132086142 3.07689 0.9630212 1.464472 0 1.157914 0.148258977 0.1460862  
0.7204681 0.6664128 1.680558486 0.347304324 2.62883 0.597159 1.02225  
1.662535644 1.991205 1.98328 0.90813799 1.363554 2.517976 0.2831918  
2.169396 0.5921505 1.411185 2.976876815 1.236374 0.278474827 0.6628009  
4.420969 1.721813 0.3446747 1.620167 0.7948831 0.9426251 1.156209772  
3.017245 2.513328 0.157918845 2.190887 0.2169923 1.38933 1.265041 1.279541  
0.8361959 0.8799918 4.146759 1.859424033 0.1925611 0.490383684  
3.652269 1.815714 1.188387 2.595963588 1.342610946 5.707629 1.384423 2.41776 0  
0.8657782 0.494680363 0.5038656 5.817517 0.4406988 0.802440245  
0.6116591 0.1228271 0.586752155 0.170549 0.729205271 0.2158499  
3.001893 1.667627757 1.378897 1.386381 2.8215263 1.774613812 0.2653563  
0.5723177 1.85634 2.654848 2.210059 2.776483 2.164463 1.12495 0.7264933  
1.241004107 0.06373573 0.462087773 1.025311 0.317617762 1.62264 0.1778741  
0.991245777 1.069395 0.2650421 0.325113 0.814765016 0.2584754 0.4638288  
0.416471524 1.48759665 1.155295 0.8170368 1.002566 1.800846322 2.111950373  
3.684389413 0.3208083 0.6859598 0.2248676 0.393758 0.3875642  
0.5142662 0.7413162 0.3607463 2.455616 0.3863555 0.8921096  
0.632095605 1.129886 0.7072703 1.496676 0.4771587 7.559019 2.03276  
0.7200359 0.3141777 1.433576 0.6926537 2.842406202 3.747633 0.5134431  
1.788574 0.61579 2.156203611 1.403533 4.02424 2.067672 0.3670689 2.723781  
0.4576087 0.5249873 1.661182443 0.5267004 0.4143713 0.517521965



0.2888469 2.08292 3.054578 0.7850662 1.931348 1.026573554 1.33137453  
1.210041 3.552302 2.323127 0.307792836 1.697079038 0.759744449 0.7927481  
0.5890694 1.403255 1.159096 2.590217 0.5012846 0.4505724 3.348234777  
3.063107506 0.6130284 1.181852255 4.940545 0.957050112 1.743684 2.281633  
0.7914103 3.576177 2.367652 0.7607607 2.754812 0.157796 0.6973901  
1.397074835 3.334709 0.5620617 0.6549324 0.9986672 3.523043854  
0.8704914 0.6090266 1.769397 1.081642242 1.160902 0.8764972 0.5653342  
0.2523786 2.260609 0.7354755 0.9113925 2.581625165 4.144131408  
3.496107503 0.2198653 0.934099805 0.327420304 1.48088 0.5685439  
1.972453534 1.568849 0.4917349 0.4283378 2.337770774 0.5846803  
0.2708843 0.172845 0.36282539 0.7978212 1.791943 0.4224613 0.9232481  
0.8953996 2.092804 0.7957842 0.3901902 3.63072 1.863494 2.099105  
0.735411984 1.129555 2.179334 1.387041 0.9083793 0.5155627 0.482215  
0.2808551 0.299802177 0.581771239 0.398048131 0.2528362 1.207665  
0.440301 0.9497314 2.060734 1.897648515 0.9451467 4.260819 0.2988303  
0.2962005 0.9527087 0.124000434 0.9341403 3.443667 1.159251 1.596435  
1.225108 4.138249 2.647938 2.903696 0.3727383 1.234188 0.384341124 0.3131368  
1.664713 1.844406 2.385299 0.9443838 2.415218814 2.227564335 0.594101971  
0.1503446 2.239531 0.6742612 0.8130325 0.9142227 0.5074409  
1.632800101 0.7100631 0.276295469 0.1643452 1.349198 1.596471 1.369101  
0.3116763 2.020970661 0.7231247 0.4823487 0.9600246 0.9966856  
0.6281551 2.736575 2.161277 1.53058349 2.584242 0.634286372 0.2603118  
0.5486391 1.657977797 4.831222 1.159209 0.6623252 1.275124336 0.4508353  
2.462107 3.105072 0.359433587 0.6411144 0.3927688 0.1654699 0.02778549  
1.4816 1.629207 0.8231397  
NALT1 0.2034182 0.694815964 0.1501152 1.037706192 1.819111349 0.287282623  
0.3003591 0.447733277 0.2347597 0.03474322 0.087422328 2.573572  
0.8596351 0.4047485 0.737878 1.288507 0.6156656 0.21860486 0.08682198  
0.194342 0.16835473 1.02244 1.84049657 0.6202239 1.141162 0.60623093  
0.1861678 0.07012286 0.2028507 0.3881915 0.04693437 0.086454919  
0.2171197 0.545107284 0.2061912 1.159006521 1.144560552 0.405280404  
0.5111129 1.315485 0.499275619 0.9030298 0.075333192 0.5154401  
0.295559305 3.55065 1.802136 1.03352 0.067692191 0.272052 0.2906173  
5.252121 0.729663478 0.8001662 0.344350243 0.2332771 0.2649156  
0.920997 0.03393418 2.147978 0.294019 0.964836 2.277718182 0.01886546  
0.08907958 0.5475702 0.07086917 0.9732675 0.479135 0.1978238  
0.1168697 1.606866765 0.1319047 0.01758961 0.282832917 0.1038808  
0.264640612 0.5279264 0.6494822 0.861087 0.02578357 0.1386566  
0.483047 0.064761785 0.718861876 0.1504193 0.08900337 1.479021 0.571835051  
0.1673229 0.1258799 0.04970819 0.561668456 0.656969 0.6440182  
0.161521344 0.3784101 1.510374149 0.09028687 0.03714493 0.127885309  
0.05564314 0.3066798 0.453906552 0.8239386 0.1983485 0.076027307  
0.4525164 1.624273521 0.183896957 0.09675588 0.724887572 0.2432423  
2.369331 5.783601 0.3687378 0.7559757 1.14214474 2.051894 0.9335402

0.1783031 0.1774833 0.1025012 0.6361554 0.9349753 0.509956  
0.3352515 0.5766876 3.531872 1.126674086 1.095152922 0.1559941  
1.324333213 0.932767103 0.02654309 1.060764884 0.1865992 0.06531245  
0.04978249 1.669930285 0.034077121 0.705178704 0.261775 0.1195037  
0.2370961 3.545696 1.222511 0.6384716 0.343281108 0.1795495 0.3794933  
1.198490711 1.599758 0.355056 0.081914136 0.6496949 0 0.356083226  
0.5529541 1.582909 0.104118563 0.3539138 0.2684301 0.2040099  
0.438031523 0.4550854 0.7622561 0.098886233 0.08564771 0.130223144  
0.6645085 0.01891083 0.194270859 0.3259086 0.550372782 1.875473  
4.227035 0.08507282 0.1908666 0.2080567 0.772436319 0.07546274  
0.3762012 1.682217 0.7568866 0.3709913 0.03787725 0.8513666  
0.5914129 0.680226921 0.018184674 4.433204 0.2122881 1.413757 0.3032021  
0.569005071 0.7285269 1.346123519 0.6406515 0.9016194 0.038911258  
0.526502827 0.09974655 0.3811882 0.34129269 0.285854 0.1859757  
0.6021607 0.4430278 0.3866636 1.700011 0.3777605 0.06673516  
0.1444325 0.5448117 1.375508 0.04335542 0.1348273 0.252126908  
1.735543 0.299145 0.17746593 0.3216603 0.3528008 0.92982 0.7239418  
0.1645664 1.093586872 5.148603 0.1143145 1.206036 0.2194115 0.06545192  
0.187722028 0.3082848 5.187246 0.06761187 0.78651612 0.137421426  
0.4767473 0.06300906 0.4160406 0.56267421 0.6777466 1.118486  
1.030811487 0.8364827 0.8390007 0.0298809 0.1430645 0.05950532  
0.1527187 1.052583497 0.286366 0 0.3108233 1.529433 0.4954817  
0.1414321 1.156437 0.2153467 0.3251604 0.804661948 1.558656 0.8839768  
0.083313803 1.291837 0.02289588 0.2390132 0.6488633 0.2250173  
0.03836129 0.1719483 3.549886 0.452761338 0.440224 0.108931979 1.213196  
0.798269 0.4784705 0.426085854 0.880621508 0.09559346 0.4036338  
0.7086368 0.3848743 0.142738 0.220829455 0.03322827 0.2888629  
0.07265657 1.225475936 0.09411941 0.06480035 0.09905757 0.05998476  
0.101239315 0.1012237 0.4144312 0.40470628 0.6451146 0.3775061  
4.04038416 0.537839582 0.02799899 0.07876687 0.8286859 0.3501569  
0.7552296 3.34606 0.7715631 4.855859 0.1533115 1.085878594 0.01681264  
0.071701552 0.6979701 0.060933354 1.74383 0.04692083 0.415682206  
0.4421987 0.04660973 0.03811578 0.242957823 0.1022736 0.1070579  
0.068662297 0.31883175 0.08707189 0.4679939 0.1577502 1.0667552  
0.942792326 1.5852238 0.09671426 0.09047355 0 0.05193407 0.1703905  
0.07913303 0.170043 0.3074403 0.6350579 0.05995027 0.09151594  
0.166738455 0.1614432 0.2835842 0.4316517 0.1332722 0.5082667  
0.5362151 0.1297123 0.06906327 0.4999381 0.6145797 1.389083031  
0.6447234 0.4966115 0.3014292 0.1082915 3.653967594 1.032166  
1.357381 1.030912 0.06916281 1.364419 0.2112445 0.127832 0.415134893  
0.1389366 0.1093057 0.17374693 0.076194 1.57508 0.865129 0.124254 0.51532  
0.218941864 0.774071221 0.4750778 0.6442221 1.085282 0.060893757  
0.491555909 3.290951863 0.1643058 0.399571 0.41643 1.239544 1.290612  
0.1711241 0.2060154 1.716446453 1.355366948 0.1819224 1.190344843

0.276447 0.132872186 0.5092423 1.223791 0.2870499 0.5061868 0.2160116  
0.1646594 0.6802989 0.02081225 0.1549156 1.319851093 1.759304  
0.01744288 0.6622562 0.188168 1.034938288 0.09567671 0.9237557  
0.4821305 0.285322908 0.3648704 0.03963572 0.1704316 0.2662966  
0.3794756 0.09949165 0.6480706 1.071437719 1.137484598 1.67484883  
0.2319903 0.147841899 0.062813922 0.6836139 0 1.505830065 1.600187  
0.1111827 0.1196363 0.625610279 0.08412596 0.2654069 0.1519807  
0.191417071 0.4783061 0.3301333 0.1311055 0.6784346 0.1090129  
1.937822 0.3307788 0.03632718 2.317882 1.575899 0.4338395 0.108635491  
0.1945873 0.3971895 0.3073417 0.6610164 0.1359986 0.08904136  
0.07408585 0.248549231 0.153463553 0.080769099 0.07410537 0.3905005  
0.03871519 1.424046 0.9224631 0.482696899 0.116348 4.429676 0.06306198  
0.02604459 0.4886621 0.021806449 2.091188 2.432916 0.3669541 0.4211185  
1.264567 2.208765 0.8067078 0.529550224 0.140462 0.5722005 0.187170649  
0.02065034 0.6426283 0.5792022 2.551797 0.7687007 0.919363472  
1.296180858 0.223880338 0.06345425 1.436354 0.05928706 0.1225527  
0.8096081 0.1657267 0.397579436 0.3908979 0.374827309 0.03468168  
1.227857 0.4785545 1.957204 0.3288643 1.122326973 0.3542513 0.1431419  
0.1741037 0.3837101 1.309811 2.186849 0.3927468 1.009369167 0.4931366  
0.150007762 0.2884006 0.1653985 0.334446105 4.598217 0.2208441  
0.1310345 0.696747627 0.2259563 0.8486425 0.4992468 0.142220735  
0.1488234 0.08633934 0.9976862 0.1026122 0.1563306 0.7763467  
0.4101408  
AL021068.1 2.897935 0.212772599 0.1972095 0.298355823 0.098752278 0.31326461  
0.07551926 0.374306986 0.2453251 0.0829871 0.069605191 0.07881015  
1.353318 0.3718369 1.589691 0.2062382 0.01934959 0.052215606 0.4147632  
0.4642023 0.109671657 0.2442184 0.252239871 0.2364027 0.1195509  
0.05363087 0.385387 0.4466516 1.155408 0.161257 3.120303 0.189296098  
0.2593043 0.022448871 0.03517892 0.833203073 0.067503185 0.136131508  
0.03590694 0.1986415 0.145041293 0.1470656 0.035987931 2.652882  
0.19414126 0.5654017 0.02657132 0.115718 0.17785733 0.394533 0.3018103  
0.1663811 0.082993452 0.1858174 0.185064631 0.1393005 0.1757703  
0.1774096 0.2161457 1.49207 0.1620667 0.6178978 0.027757761  
0.2253087 0.1595805 0.3269794 0.1551706 0.2615323 0.6069075  
0.08591249 0.1395765 0.220020547 0.2800582 0.4411498 0.080425021  
0.1578996 0.494699732 0.1192835 0.6463928 0.0587651 0.1231724  
0.08279826 0.4072229 0.444730766 0.130080451 0.1796445 0.06074058  
0.7523483 0.105067388 0.3164012 0.2104724 0.1632567 0.391297746  
1.569226 0.3436609 0.087683476 0.6327049 0.257689678 0.359429619  
0.06654283 0.1527324 0.2658166 0.1077251 0 0.2884206 0.4935125  
0.204297308 0.1279982 0.203008275 0.282377137 0.1650782 0.229682785  
0.09683411 0.1632504 0.1712556 0.2642283 0.1389009 0.36537169  
0.05327305 0.1140259 0.01521042 0.3097978 0.07651024 0.1022748  
0.1477897 2.144867 0.2520963 0.3214089 0.4440091 0.029251692

0.601648885 0.1693659 0.0741394 0.146097872 0.1109507 0.143418453  
0.06077834 0.7020192 0.198182762 0.099719218 0.352716282 0.206250435  
6.330875 0.4460072 0.1573122 0.1002271 0.09480749 0.2096934  
0.131778603 0.2639194 0.1743176 0.460076096 0.1240635 0.6625634  
0.065219598 0.1396666 0.2226995 0.101254129 0.2584129 0.0982055  
0.217608939 0.2197917 0.1831908 0.2893313 0.104627508 0.4529207  
0.03873857 0.438653563 0.1278605 0.111088898 0.1190426 0.09034023  
0.464032261 0.0810896 0.197191741 0.02635133 0.1344226 0.05080089  
0.06512869 0.2129833 0.153752418 0.2343238 0.2546 0.2511323  
0.1427279 2.606306 0.01507883 0.1245037 0.1858736 0.33555221  
0.738405536 0 0.1170157 0.06664887 0.2036879 0.217458623 0.127952  
0.184486094 0.08896801 0.2910262 0.058089254 0.176849468 0.1191265  
0.4750435 0.061140469 0.04267414 0.08542664 0.9035545 0.2002017  
0.4482072 0.2295133 0.2022425 0.2125367 0.02653762 0.1469242  
0.09254975 0.06903872 0.6440926 0.26765613 0.4267417 0.2198563  
0.105973069 0.1646384 1.601119 0.08542128 0.06650753 0.09071095 0  
0.2741564 0.3185581 0.02250561 0.4764388 0.2084499 0.037365819 0  
0.1869207 0.1291973 0.136629804 0.328242616 0.2846877 0.3612058  
0.03680548 0.177881638 0.384478 0.01436343 0.606875302 0.219781 0.1043762  
0.3568652 0.155328 0.07106672 0.1823907 0.239446102 0.07600104  
0.075197374 0.1972073 0.09132951 0.4684686 0.2895621 0.03002441  
0.3790121 0.02284332 0.279000382 0.2970463 0.3519088 0.066334004  
0.3085661 0.1914106 0.361572 0.1881978 0.1033602 0.4581458  
0.1642852 0.0821628 0 0.1819924 0.308979401 0.5966101 0.1430049  
0.3546829 0.090869807 0.114317305 1.826664 0.1836406 0.1880709 0  
0.4261772 0.167831267 0.1984213 0.6468499 0.08677316 0.133052372  
0.4175082 0.5030385 0 0.3761064 0.556182794 0.136002 0.08838426  
0.147102708 0.03278533 0.4085851 0 0.142741667 0.2006338 0.2194982  
0.2879107 0.3717241 0.1424155 0.1029057 0.172008 0.4188393  
0.1144367 0.133499893 0.3212672 0.256897768 0.5001481 0.418440245  
0.3975954 0.1494325 0.176158232 0.5827469 0.2226625 0.09104274  
0.089280794 0.2850039 0.2191859 0.065602265 0.175743786 7.331243  
0.1470846 1.329881 0.179158667 0.16085276 0.135230006 1.068422 0.04322074  
0.1700206 0.2108831 0.2238456 0.3375284 0.203081 0.1748445  
0.09101335 0.3007121 0.2029797 0.341373257 0.2669682 0.1604285  
0.779564 0.1591659 1.073956 0.3735652 0.3208941 0.09897806 0.04592862  
0.3769125 0.245075222 0.1283313 0.1078362 0.5321657 0.3409653  
0.185260085 0.026798 0.2494014 0.4151756 0.9086065 0.1906879  
0.07208216 0.1653912 0.936496521 0.1797584 0.2610857 0.25196983  
0.06824841 1.04992 0.1215549 0.2143492 0.293734 0.990873528 0.085598802  
0.3014215 0.2331483 0.7598085 0.145449853 0.293530642 0 0.05351702  
0.2120909 0.2026196 0.1184302 0.1813373 0.5759578 0.1324845  
0.099511565 0.311289209 0.2172684 0.090261543 0.8018134 0.380851648  
0.5689463 0.2396007 0.3116558 0.1373943 0.2916306 1.04471

|             |             |             |             |             |             |             |
|-------------|-------------|-------------|-------------|-------------|-------------|-------------|
| 0.2954456   | 0.04971181  | 1.225721    | 0.368482812 | 0.1254402   | 0.06249566  |             |
| 0.3266874   | 0.2247275   | 0.378373011 | 0.1256925   | 0.8154338   | 0.3430326   |             |
| 0.030978078 | 0.03112585  | 0.1420099   | 0.1272157   | 0.3975448   | 0.1456729   |             |
| 0.1307043   | 0.02496728  | 0.043376593 | 0.158784398 | 0.075959185 | 0.1558486   |             |
| 0.039236977 | 0.225054491 | 0.2099403   | 0.1023504   | 0.16083259  | 0.2635987   |             |
| 0.2065539   | 0.04762689  | 0.405601872 | 0.1339613   | 1.536101    | 0.1815094   |             |
| 0.068582362 | 0.4341402   | 0.05376485  | 0.2818409   | 0.1038781   | 0.3905796   |             |
| 0.4036615   | 0.1823292   | 0.04338525  | 0.09611902  | 0.794274    | 0.3408757   |             |
| 0.556039269 | 4.328339    | 1.49798     | 0.4194923   | 0.236834    | 0.1771877   | 0.1519163   |
| 0.02949338  | 0.431767789 | 0.299913204 | 0.115754265 | 0.1416055   | 0.3190963   |             |
| 0.2157738   | 0.03149493  | 0.2623072   | 0.597832189 | 0.7741696   | 0.2763604   |             |
| 0.3012577   | 0.2488388   | 0.2834654   | 0.156259603 | 0.4931348   | 0.01886761  |             |
| 0.1195228   | 0.197583    | 1.090745    | 0.1372324   | 0.0469973   | 0.13552234  | 0.3355054   |
| 0.7305037   | 0.149024271 | 0.2712878   | 0.17908     | 0.2213557   | 0.3061507   |             |
| 0.1020059   | 0.134840684 | 0.309603683 | 0           | 0.5873175   | 0.2905158   | 0.5098036   |
| 0.1610001   | 0.2057252   | 0.5176529   | 0.217628553 | 0.01945193  | 0           | 0.1656802   |
| 0.233777    | 1.303097    | 0.3756653   | 0.4488686   | 0.312756759 | 0.1301783   | 0.1139688   |
| 0.359153    | 0.203672    | 0           | 0.1014266   | 0.5295775   | 0.075342594 | 0.1558983   |
| 0.496116189 | 0.4756477   | 0           | 0.138262951 | 0.5141961   | 0.1623091   | 0.05216447  |
| 0.114775187 | 0.2556548   | 0.1034211   | 0.3540213   | 0.056617695 | 0.1454225   |             |
| 0.164983    | 0.7447054   | 0.5252098   | 0.1659594   | 0.2980236   | 0.7635552   |             |
| AL049840.5  | 0.2863858   | 1.334377147 | 0.355055    | 1.060543526 | 0.529675373 | 0.615476319 |
| 0.1557927   | 0.617742145 | 0.5783934   | 0.1711985   | 0.229747567 | 1.144575    |             |
| 0.4364243   | 1.350064    | 0.3992383   | 0.9425567   | 0.7025444   | 0.229799118 |             |
| 0.5419034   | 0.9576274   | 0.422328597 | 0.9788328   | 0.059469597 | 1.17045     |             |
| 0.3946046   | 0.486807016 | 0.8561918   | 0.04607106  | 0.1537776   | 0.3659322   |             |
| 0.6167222   | 0.454410395 | 0.6181443   | 0.185243855 | 0.7547536   | 1.596875173 |             |
| 0.807684168 | 0.524221392 | 0.8000028   | 1.013294    | 1.090466451 | 1.348398    | 0.118786251 |
| 0.4354028   | 1.10684818  | 0.5742263   | 0.6139323   | 0.5092709   | 0.320213493 |             |
| 0.4213145   | 1.369765    | 0.9336028   | 0.719088645 | 0.9638073   | 0.135743864 |             |
| 1.609274    | 0.02900847  | 1.024765    | 0.2229492   | 0.3024069   | 0.1337344   | 0.57878     |
| 0.366482902 | 0.5949455   | 0.3511543   | 0.7195126   | 0.2793683   | 0.6714135   |             |
| 1.860146    | 0.3544668   | 0.6449852   | 3.086465767 | 0.1733241   | 0.03466938  |             |
| 0.238914763 | 0.986525    | 0.045357433 | 0.5062138   | 0.5067216   | 0.2424593   |             |
| 0.5081979   | 0.2732942   | 0.8680845   | 0.89352492  | 0.644039626 | 0.2594187   |             |
| 0.2004879   | 0.323908    | 0.404598267 | 0.7145576   | 0.1736778   | 0.2694328   |             |
| 1.014801945 | 1.231212    | 0.9722828   | 0.173651405 | 1.379826    | 0.850562668 | 0.266935095 |
| 0.2562462   | 0.378095696 | 0.2193469   | 0.7111416   | 0.417506317 | 0.7279977   |             |
| 0.09773693  | 0.749254622 | 1.032745    | 1.489054256 | 1.501634778 | 0.1907072   |             |
| 0.641485838 | 0.5753209   | 0.6585878   | 1.036324    | 0.1453575   | 1.06022     | 1.004992784 |
| 0.4395991   | 0.4809147   | 0.1506163   | 0.2421846   | 0.4040628   | 0.7233874   |             |
| 0.6504176   | 3.802016    | 0.4160502   | 0.8588095   | 0.5862208   | 0.579310683 |             |
| 0.949767404 | 0.2236121   | 0.774926862 | 0.874039785 | 0.3139009   | 1.814641815 |             |
| 0.5015314   | 0.1930977   | 0.948512752 | 0.493718519 | 0.402998997 | 1.361551784 |             |

0.3547241 0.5594158 0.597131 0.2481166 1.564667 1.069671 0.797435617  
0.4355627 1.179518 0.928023864 0.3685494 1.487119 0.618906807 1.511058  
1.102605 0.300790799 0.7581778 0.486224 0.205219196 1.032402 0.4534967  
0.3267116 0.805808716 0.5381879 0.4475287 0.250593685 0.1688129  
1.246691133 0.1637195 0.1863676 0.287183009 0.240889 1.735668367  
0.6523386 2.489604 0.223573 0.2418434 0.3807912 0.285465596 0.5057098  
0.3213158 1.849126 1.374058 1.333418 0.07465661 1.164365 0.7975729  
1.632201711 0.179211275 1.016036 0.7402869 0.8799583 0.1867549  
1.368251035 0.4645679 1.391857817 0.4698543 0.7204479 0.383473266  
1.297180878 0.4587377 0.163332 0.639058196 0.1408556 0.1127879  
1.034705 1.085618 0.6276279 1.282025 0.616197 0.3946079 0.1094917  
1.143111 0.8782585 0.1993931 0.4724383 1.325188772 1.207334 1.088528  
0.209872752 0.4528551 1.172204 0.7753683 0.5488076 0.2994119  
0.554265147 0.7433227 0.5007013 0.2228544 0.03931483 0.2150111  
0.123334279 0.1139313 0.1762782 0.1865696 1.155629482 0.180573081  
1.708501 0.8941807 1.336332 1.402608175 1.502829 0.4740973 0.686786833  
0.7254366 0.8268412 0.2061349 1.435545 0.2638931 1.053538 1.25138061  
0.9093621 0.165470549 0.4786228 1.921766 1.464903 0.2986765 1.040574  
0.4691305 0.4900968 1.406935804 1.274608 0.7743694 0.054737571  
1.232911 0.2933328 0.6595379 1.205838 0.1364654 1.398797 0.6439339  
1.166146 0.89239916 0.2669809 0.966179295 0.6095284 1.520953 0.8455131  
1.109763983 0.56599492 27.13192 0.4924945 1.086348 0.7585927 0.6752129  
0.276982399 0.4584538 24.55334 0.3436972 1.800593892 0.2120123  
0.1915836 0.366082323 0.3546925 0.199544158 0 1.54618 1.040454709  
0.5140229 1.674158 0 0.824514142 0.1655592 0.2846262 0.5642489  
1.917123 1.018494 0.7642429 0.6691353 0.2658602 0.5288134 0.440646386  
0.09941388 0.367444476 0.1719636 0.240201048 1.312353 0.3699265  
0.581449817 0.1502724 0.3062282 0.2629436 0.442036975 0.5039568  
0.2713021 0.32480252 1.305184153 0.5148599 0.2912914 0.4023773  
0.887030139 1.158394184 0.520749847 0.2859378 0.1783247 0.4676594  
0.2047256 0.4365948 0.4010717 0.1340629 0.2597011 1.702323  
0.330856 0.4638324 0.610338691 0.8811884 0.3530201 1.577077 0.3502418  
28.8981 2.554145 0.5661152 0.3811492 0.8085212 0.9166938 1.151163671  
1.524911 0.0889844 1.007423 0.6209283 1.324900473 0.1326792 1.54351  
0.7560718 0.08179254 1.258816 0.1784425 0.2939519 0.78793182  
0.3423076 0.2633193 0.366918982 0.1877243 0.6497804 2.307011  
0.5170249 0.8310299 0.227125046 0.42380711 0.7315509 1.65455  
1.973142 0 0.899659263 0.166320867 0.2944082 0.6125468 0.7599904  
0.553783 1.421543 0.4292757 0.3123534 1.280995073 0.51373998 0.278889  
0.856544437 21.01684 0 1.230371 0.593142 0.617214 2.176803 1.166218 1.054774  
1.676099 0.164085 0.8778551 0.777055189 1.500907 0.3094215 0.1986351  
0.40797 1.457055975 0.7166047 0.1583249 1.981448 0.357875373 0.5136892  
0.1562452 0.1679616 0.5248744 0.988365 0.372589 0.3296404 0.429522564  
0.43675298 1.044668138 0.2572066 0.420908982 0.371421452 1.193423

1.520237 1.134118744 0.4712862 0.6087298 0.1572033 0.880776376  
0.3868981 0.3219205 0.629068 0.226371493 0.1131298 0.2366173  
0.4134574 0.4114475 0.179055 0.6217752 0.5516668 0.548944 0.6027986  
0.7124129 0.9451148 0.428244254 0.5753015 2.307395 0.7500072  
0.3908619 0.1705806 0.2507169 0.1216869 0.066803746 0.274980806  
0.541270019 0.3213381 0.7696821 0.1271803 0.8836269 1.645027  
1.40948531 1.113858 0.5212511 0.2900242 0.2566713 0.192632 0.107452067  
0.4725587 0.5604911 0.7671065 0.5335912 0.5538846 1.962854  
0.4653754 0.782813374 0.1661116 1.750058 0.368916062 0.1831595  
0.4222099 1.780921 1.355014 0.3928089 0.985516501 1.805385822 0.132381417  
0.1250693 2.968063 0.5842783 0.3623297 0.3734732 0.2010152  
1.077497893 0.4494382 0.205219461 0.2392533 0.280594 0.7923198  
0.6888709 0.2083488 1.806566896 0.1074207 0.4075279 0.7799113  
0.5602209 0.1244172 0.8788011 0.6991959 0.671449924 1.114918  
0.636822249 0.2165493 0 1.546580205 2.342163 0.2009016 0.3874063  
0.615617093 0.2578419 1.604414 2.429306 0.436051978 0.2399998 0.4084226  
0.07374202 0.2022502 0.4108397 0.9017194 0.3328679  
AC074117.1 0.3521236 1.32935481 0.6414299 1.366486622 0.929427668  
0.824464081 0.9174417 1.037467464 0.3181503 0.2215746 0.845594944  
2.10843 1.071543 2.01042 2.569742 1.452878 0.909272 0.906197871 0.6183055  
0.9192325 0.693012158 0.8243904 1.693314854 1.830458 1.474702 0.830524002  
1.048767 0.5515564 2.154473 2.050515 0.6235907 0.928131901 0.8577317  
1.816128145 0.925184 1.352726126 1.212064992 1.284259007 1.169628 1.58629  
0.946632015 1.055829 0.369936313 0.9939911 0.768107699 1.132212 1.539509  
1.421242 0.617340082 0.4895205 1.236949 5.926102 1.207673913 0.7371077  
0.790592633 1.735676 0.6898779 1.615254 0.5915342 1.104284 0.9159161  
1.573979 1.934346594 0.5714929 0.3550651 1.420131 0.6176889 1.163813  
1.629696 0.2064468 0.7900555 1.827629316 0.518753 0.516017 0.876114159  
0.8492027 0.829195559 1.355838 0.5652196 0.6903694 0.4193079  
0.4642478 1.340979 0.531760308 1.819921587 0.7134775 0.3527342  
1.724914 0.883665383 0.7202926 0.7987843 0.6974298 1.870618612  
1.548857 1.249644 0.599331461 0.3921624 1.499901951 0.633384094 0.5270835  
0.38230661 0.3666924 1.420866 0.656151277 1.707765 0.6377535 0.945483792  
0.9341265 1.445412572 0.67854928 0.6743581 1.976553027 0.6825613  
4.760741 2.202423 0.4409291 0.8808014 1.222674456 0.9601093 1.657549  
0.5685631 0.4484058 0.5352174 1.107894 1.376705 0.3959249 0.9660879  
1.01753 3.046733 1.905680864 1.49464622 0.8817999 1.346069045 1.370154618  
0.5205309 0.912639318 0.9736648 0.8278526 0.433899434 2.249805256  
0.514339478 1.050892914 1.032983 0.8955071 1.772492 1.097181 1.756756  
1.465865 1.321382178 1.012951 1.456783 1.719756894 2.020613 1.132183 0.570293963  
1.035856 1.019977 0.756972547 0.7896204 0.7014052 0.867369877 1.282022  
1.510149 0.8497624 1.485233264 1.243153 1.189462 0.558572246 0.436974  
0.729650896 1.758727 0.621109 0.980843885 1.104192 1.725748808 1.090545  
2.612043 0.2984031 0.4912473 0.398064 1.144316563 0.8566481 0.3518856

1.779458 1.587841 0.7306746 0.2375358 1.290911 1.071966 1.17884272  
0.202952042 1.972515 0.7914908 1.500726 1.021219 1.085018627 0.7925826  
1.252549657 1.116455 2.610842 0.567657319 0.771237142 0.8057681 0.3012356  
0.571355171 0.4443638 0.7572526 1.55088 1.462339 0.8630803 1.876104  
1.125661 0.5178169 0.495986 1.580352 3.10119 0.9262711 0.6305638  
1.353347091 2.718272 1.078638 0.57155264 0.5861102 0.6428526 1.317126  
1.083203 0.4359549 1.265344663 2.201211 0.7573914 1.081615 0.05724387  
1.085289 0.279345636 0.2519044 1.739637 0.6122957 1.190159915 0.292134645  
1.49604 0.5826676 1.336475 1.155691929 1.188639 1.211866 0.870359398  
0.992247 1.192765 0.3239608 2.007263 0.4980867 0.9617877 1.624933975  
0.9638789 0.548788024 0.8920228 2.255601 1.468051 0.8343333 0.8337142  
0.8601642 0.7135993 2.015443411 2.173121 1.840035 0.615460775 1.513315  
0.4125017 0.8332865 0.6857456 0.9658964 0.2752299 0.7402041  
2.320974 1.130930236 0.5237113 0.612215603 2.025312 1.238799 0.6313327  
1.387793951 0.982827286 1.630804 1.26257 1.421077 0.1090903 0.8420371  
0.787388921 0.5297824 1.588915 0.5050697 1.300208679 0.7545946  
0.2686214 0.485649187 0.4160256 0.74250077 0.3954014 1.109129  
1.155843942 0.9453936 1.049538 4.13636416 1.308507119 0.3035576  
0.5190796 1.056987 1.023515 1.237917 1.79508 1.289207 2.52907 0.3116554  
1.023501043 0.4503344 0.791087512 0.545284 0.558615274 1.339607 0.3291609  
0.701234801 1.332263 0.4706508 0.7049409 0.411203212 0.8316174  
0.6242386 0.367830287 1.087058418 0.4858877 0.7186668 0.8581019  
1.610450186 1.038548596 2.545490838 0.7247333 0.3923561 0.9154721  
0.4935016 0.8312979 0.8074723 0.4663124 0.8543041 1.04492  
0.3746857 0.7712414 0.668405903 0.9820826 0.8995185 1.020571  
0.6044032 2.269026 0.7551853 0.6086118 0.7487657 1.222201 1.080504  
1.70130472 2.268298 0.7126055 0.8567047 0.7910831 1.511406888  
0.6797282 3.767877 1.945633 0.5778216 1.943968 0.3656712 0.529911  
1.039396398 0.5944033 0.7125869 1.072452997 0.7774825 1.518439 1.2387  
0.75721 0.7805316 0.727545693 1.421567295 1.637988 1.431757 1.079974  
0.660193984 1.158790986 1.190666325 1.071674 0.6370651 0.6836172  
0.9170014 1.361724 0.9028377 0.4396383 1.63667943 1.429558285  
0.5801041 1.012188502 2.052681 0.618595573 1.964327 1.279462 0.4784675  
1.841542 1.704046 0.6628842 1.503719 0.6503767 0.5433851 1.546822639  
1.959304 0.6173919 0.5417141 0.7440246 1.091071625 0.6071265 1.10781  
1.269166 0.769213287 0.6523793 0.4676364 0.6725357 0.5731776  
1.300805 0.8692747 0.6266259 1.401361424 2.077367161 1.548117351  
0.5825594 0.686192856 0.706049102 1.438715 0.772 1.151629394 1.275647  
0.5318001 0.5044142 1.561731129 0.6169894 0.4947688 0.4991667  
0.433370045 1.110343 0.7368978 0.8319437 1.231448 0.6836415 1.695694  
0.835702 0.5714681 1.591147 2.120702 1.259626 0.46518041 0.7562214  
0.9465692 0.7700272 1.301575 0.6662671 0.8680153 0.7520336  
0.533176908 0.836354284 0.551161513 0.3922633 1.094471 0.6296098  
0.8072746 1.393711 1.79002982 0.6625076 1.944838 1.079176 0.4650776



1.317808 0.677968375 1.817846 1.667455 0.5744241 1.155801 0.7616725  
3.342462 2.095553 1.248358558 0.6852835 1.189137 0.532181963 0.5103272  
1.127048 1.22636 1.367318 1.230135 1.270367033 1.454883237 0.621090777  
0.384445 1.540266 0.9603809 1.105934 1.208424 0.9471635 1.130436881  
0.6803671 0.285526912 0.3428323 1.276736 0.6409152 1.333648 0.4269563  
1.455384849 0.9123833 0.8063826 0.9589343 0.9561847 0.61895  
1.970128 1.482644 1.577124532 1.27649 1.026583916 1.213044 0.1384461  
1.324875869 2.635963 1.213418 0.4108717 1.911471922 1.027685 1.253645  
1.656645 0.614752228 0.5522152 0.5341095 0.4334613 0.8460568  
0.9083749 1.79479 0.7462351  
LINC00265 4.592838 1.232086547 0.2778889 1.496774431 0.758117906 0.946699395  
0.894485 1.063406061 0.1742422 0.3943885 0.549624036 1.862318 0.7551777  
2.637087 1.00563 1.651718 0.5545724 0.483574067 0.5711205 0.3280835  
0.459729034 1.203989 1.549149591 1.401184 0.8880694 1.3645656 0.9190093  
0.7837552 0.512309 1.691885 4.191177 0.593869894 2.043334 1.024187404  
1.116279 1.686074621 1.061116479 1.70308844 0.9293559 1.859003 1.668448251  
2.394235 0.263122032 11.82637 1.352342749 0.9285322 2.385678 0.4286704  
0.354650579 0.230767 1.354886 2.481615 1.213596063 0.5356704 0.402917421  
1.819686 0.5551747 1.540969 0.4266883 1.286127 0.3554802 1.357751  
2.086305392 0.5930356 0.2852072 1.077398 0.5198134 1.100558 1.95243  
0.3768842 0.4245277 2.470182881 0.3173805 0.614366 1.086659505  
0.5871286 0.554598367 2.581501 0.5151377 13.14744 0.6033769 0.4116522  
1.339816 0.23750839 1.07280668 1.503903 0.6172969 0.4400573 0.75282554  
0.5405898 0.4396706 0.425368 2.20155603 0.7974836 1.14385 0.764177676  
0.3172085 1.823781114 0.462516111 0.3892168 0.770514119 0.5376991  
1.946998 0.264232386 1.463726 0.8544373 0.843109887 1.276909 2.157144858  
1.091928768 0.3620857 2.857396773 0.6060416 1.989314 1.043431 0.3606173  
0.7921364 1.837907573 0.7322607 1.596976 0.2580059 0.3194919  
0.4519925 0.7477713 1.450337 5.405441 1.114579 1.145879 1.545252 1.916281631  
1.384695182 0.5745719 1.712917661 1.08420216 0.2920337 1.768620401  
0.6398994 0.376401 0.156491217 1.633154292 1.499699637 2.895319106  
6.023095 0.6782745 1.40321 1.61216 1.558258 0.4961837 1.216132953  
0.8442086 1.661955 1.091365814 1.654509 0.8758428 0.61036331 1.806314  
0.9468869 0.775843919 0.7809353 0.5456947 0.677322167 1.25592  
1.312593 0.280571 1.983830473 1.038481 1.382177 0.814127797 0.2206219  
1.143598687 1.027034 0.7529851 0.672890227 0.744655 2.588736832 1.525907  
4.547165 0.4308535 0.571418 0.2647249 1.287145892 0.7011082 0.3898161  
2.655323 1.655751 15.12263 0.3042826 1.553572 1.696027 1.322229352 1.568820683  
1.314356 0.9810286 0.6887122 0.3640371 1.248092074 0.696018 1.325727815  
1.176069 1.685224 0.309191478 1.04590674 0.354199 0.3068021 1.364907805  
0.6177749 0.4197232 0.8736423 1.39684 1.004953 1.61094 1.719813  
0.233091 0.2405936 1.430248 3.363039 0.4593402 0.4238294 1.492166811  
1.310433 0.8841012 0.923574857 0.5403441 6.379558 1.811192 1.063295  
0.6676452 0.867607338 1.741022 0.6610221 0.7766638 0.2438403

0.6553456 0.273196317 0.08748755 0.9137041 0.7840286 1.043907623  
0.431984142 1.684094 0.5942068 1.754528 1.167616723 2.745972 0.7645219  
0.689653038 1.121913 0.4945121 0.1304592 2.139591 0.5351849 0.8867981  
2.415945831 1.03911 0.2345804 0.7938717 2.550791 1.197003 0.3669646  
0.8868623 0.8630022 0.4676463 1.024474276 1.135139 1.500885 0.237647161  
0.527203 0.2119211 0.9962183 0.7446529 0.5562004 0.4354591  
0.6185943 1.734893 1.363952616 0.2069852 0.75619426 1.055201 1.728669  
0.8471208 1.796497548 1.390803054 8.430637 1.282249 1.551069 0 0.6730452  
0.553939393 0.4564984 1.374672 0.7613196 1.610954551 0.65278 0.2263332  
0.87793945 0.1309459 1.336631968 0.3535519 1.612946 1.112401401  
0.5225603 0.7911268 1.11411793 1.113216984 0.3813975 0.4447694  
1.194604 1.29776 1.203229 4.619642 1.189348 1.465193 0.2543543 1.299568346  
0.2055298 0.530927551 7.740186 0.430973887 1.411961 0.4534124 0.613538585  
1.059847 0.3852871 0.3261683 0.456937097 0.910908 0.5021338 0.402901104  
1.096475733 4.374298 0.636633 0.3954137 1.274969377 1.359951054 3.078215516  
0.3124662 0.3476043 0.1988941 0.6348795 0.3927898 0.4027456  
0.7364635 0.368167 1.534936 0.4522887 0.5525288 0.557421068 0.8588405  
0.5682321 1.176713 0.610309 3.017945 1.092513 0.805793 0.4583229 0.6223537  
1.050088 2.144697174 1.306088 0.7095899 1.039092 0.7289679 2.426077784  
0.3213265 2.565018 1.41099 0.4396579 2.139455 0.3583745 0.5804354  
0.477954247 0.3963076 0.6659945 0.550508043 1.051208 1.445718 1.735998  
0.409881 0.773138 0.462853866 0.811097421 2.188256 1.118244 11.71507 0.51754155  
1.655577436 0.994721591 0.9703847 0.4652041 0.6248951 0.7793014  
1.332458 0.6737689 0.2878263 3.20130143 3.086200162 0.5295119  
1.102096341 3.434663 0.798239786 1.176217 1.821888 0.5742171 0.9884713  
1.341663 4.615325 2.51654 0.2544239 0.5951942 1.891873693 2.366228  
0.164495 0.7442191 0.9989878 2.250033881 0.4377724 0.7084211  
1.709055 0.416747144 0.564382 0.6183596 0.4092548 0.2674079 1.377494  
0.7262794 0.2336584 1.154402216 2.99263422 2.006728682 0.3848878  
0.912269158 0.246819392 0.8732199 0.463961 2.133743654 0.7387886  
0.4660037 0.4967926 2.653356505 0.3721887 0.4706343 0.4671346  
0.354345875 0.588057 0.4559915 0.7189381 0.8324053 0.5013309  
2.424025 0.6843148 0.6767078 1.613547 1.095803 1.403651 0.368598402  
3.992943 2.803795 0.8792281 0.7041787 0.81184 0.6131174 0.3148312  
0.181517466 0.526268242 0.547290377 0.5797871 1.069609 0.4417302  
0.3223807 1.246591 2.435264828 0.5921503 1.783884 0.3744444 0.3001942  
0.9509246 0.228495182 0.8606686 1.280163 0.6719156 1.334292 13.71678  
5.895298 0.8590397 1.545737796 0.4906026 1.350757 0.610162296 0.133435  
1.309325 1.464669 1.452918 0.8004979 1.414024566 1.545308345 0.273687425  
1.008424 2.204993 0.3230393 0.9417083 1.389824 0.7703111 1.203502097  
0.6826596 0.341843575 0.1211354 0.6401867 13.24484 1.39163 0.5333016  
1.032276597 0.6186605 0.8999327 0.834763 0.6601794 0.2314999  
1.438646 1.79216 1.383759259 1.312076 0.403033572 0.4604887 0.007221253  
0.817701938 2.682773 0.5992867 0.5720927 0.906300251 0.4153763



6.9833638 4.658742539 8.817919098 3.615145 5.835604 3.873168436 4.511003  
0.175320883 4.022367 3.525216437 3.142891 6.774361 1.190114 0.525127297  
0.263808 7.425099 25.96467 5.05394617 1.163878 0.968354622 11.91363 0.884836  
5.589002 0.5045567 2.422951 0.7018077 7.186482 5.273826143 1.024452  
0.3455208 4.070825 0.8475666 3.373994 9.517583 0.2441461 2.49322  
13.457858074 0.3979347 0.2046791 3.735190275 1.52015 0.267778643  
5.728066 0.4723507 1.383703 0.9000809 1.030821 5.841339 0.690792375  
5.069659513 0.4375833 0.3945431 4.435403 2.729879217 1.189852 0.4882616  
0.7471291 7.56455833 5.284472 2.551159 2.078864235 0 5.942112668  
0.612856332 0.5763092 0.496039987 0.5755412 2.693972 0.352121447  
6.088708 1.057859 1.87994796 3.972329 6.666503865 3.515536629 0.1876478  
8.836724693 1.069283 8.306467 5.51564 0.8939098 2.593931 2.650171345  
3.763157 9.710876 0.5433998 0.4501208 1.490927 3.891076 5.41319 0  
4.719859 6.064346 10.23849 6.935205968 7.306329312 0.9901115 6.902585229  
4.359400352 0.6434689 4.929615198 3.618893 0.3166664 1.062026448  
9.958856972 1.057423392 4.019126121 1.840358 2.288677 6.233154 2.644808  
9.576097 5.695941 4.707855195 3.133955 6.312504 7.5126171 8.300355 3.615116  
1.403296717 5.821266 1.69692 3.222733031 2.517799 2.152906 1.262043182  
5.600846 8.552577 1.434252 6.541270749 4.32469 4.560759 0.547941033 0.1661047  
2.128669227 5.831565 0.7335112 1.789646704 1.817188 7.08035126 3.123783  
20.42195 0.5499657 1.189818 0.5187908 2.933697535 1.726953 0.5836819  
8.689495 7.725796 1.438997 0.2203767 7.91871 6.308404 6.0799202 0.035267246  
7.597993 1.330141 8.117263 1.580326 7.393617411 2.908913 5.264125354 3.843006  
4.489636 0.64144619 4.11629483 1.160687 0.9642705 2.382843507 1.247363  
1.13753 3.174093 6.084104 3.881799 4.816474 3.966287 0.08628384 0.3878466  
6.101039 12.28623 0.3083052 0.1743221 2.689353684 9.157233 2.722289  
1.204617219 1.158534 3.010567 5.097755 2.448015 0.9820282 6.938358958  
6.137381 1.207038 2.996816 0 2.411804 0.121355654 0.1121035 3.382279  
0.9178824 6.905741537 0.533028561 8.594584 0.8065159 6.634237 3.819364332  
2.924579 4.338371 1.464165868 2.011614 3.593296 0.1448771 11.32535 0.8366808  
1.925181 6.577760842 1.23417 0.325631883 1.676562 10.12207 2.842764 0.9012469  
4.973134 1.362832 1.112848 4.70683978 6.817485 7.476599 0.215437712 5.459092  
0.3774352 2.101385 3.092072 4.263266 0 1.76742 13.76925 5.488016222  
0.1970233 1.188348866 1.70698 5.650777 2.079872 5.577851175 4.009786469  
5.376408 2.944838 6.108115 0 2.491427 0.739748257 0.6229461 0.3501368  
0.3381833 4.105175587 0.4693747 0.2199285 1.296753641 0.1163341  
0.746103076 0.8588679 5.597512 4.06092626 2.87494 3.866578 0 4.906352549  
0.2172043 0.35644 4.032482 3.961371 3.72596 7.937591 5.147495 3.688491  
0.631829 3.499587339 0.195638 0.584041734 1.962777 0.531782 6.333515 0.1516633  
3.562758142 4.317559 0.4218416 0.5913721 1.304836417 1.024802 0.6228825  
0.506020325 3.805171467 1.857534 0.7643154 1.367731 3.814457988 4.464257088  
6.917340219 0.4689176 0.4211133 0.09203137 0.6043238 0.6278632  
0.6796534 0.6595606 0.3974986 2.61105 0.6976031 0.9634925  
1.293486193 3.949902 1.968355 5.104528 1.493366 1.971459 0 1.563286 1.151892

4.052334 2.222755 6.183906826 7.877348 0.6566764 6.405072 1.164656 5.448569174  
0.3046182 20.68872 8.322855 0.6438429 7.797685 0.5267395 1.012326  
3.10116481 0.5838144 0.8950551 0.842409356 0.9235636 8.09851  
3.947826 1.445865 3.543358 1.743154365 3.085859683 2.562541 6.890633 5.189396  
0.196828307 4.66446127 2.495702423 2.346449 1.578552 1.615244 1.410326  
3.496845 0.7844365 0.5532162 8.920067707 5.560479787 0.5096276  
3.554430391 1.914785 0.927689442 6.180598 5.097003 1.18932 7.898187 5.591827  
2.814178 7.346478 0.4843578 1.765099 4.25510435 10.18503 0.3721147  
1.172691 2.262578 5.079326068 2.226658 1.363118 5.252146 2.3894811 1.667979  
1.255531 0.4131676 0.4518972 5.046533 1.408561 0.7703361 4.050221679  
8.394376697 4.605031228 0.7030008 1.720342102 0.395918054 6.704743  
0.4570647 6.600573668 3.263913 0.383337 0.7476262 5.407872748 0.2719223  
0.2771615 0.2063253 0.631096284 0.3339446 1.833468 0.6102366  
1.315752 1.127568 3.015301 1.529756 2.019644 15.07794 4.486297 4.074078 0.571864748  
2.948292 5.189436 1.078579 2.756238 1.438663 0.6167367 0.3113102 0.197196084  
0.865821918 0.689229644 0.4024146 2.750319 0.5506161 2.608353 7.070886  
6.27560144 0.8381087 6.603443 1.243404 1.111236 1.001863 0.317184711  
1.885742 10.69296 2.307531 3.06268 4.30549 14.11381 5.647551 4.584850421  
0.7355104 3.099569 0.937743858 0.4405405 3.53121 4.830195 6.847163  
4.334402 3.25320748 5.496854258 1.345995731 0.2461256 8.693945 1.701718  
1.521139 2.305112 0.6428188 6.039994669 1.484622 0.363468906 0.3699379  
3.520179 3.452553 5.377368 0.6605759 5.695525973 1.162671 1.233815 2.82403  
1.874193 0.9181589 4.6941 2.874769 4.257702669 7.594831 1.812681208  
0.266344 0 5.388558226 15.53092 2.207411 0.9318007 4.70614071 0.3228977  
4.433724 7.443316 1.256522584 1.600569 0.9711867 0.3144223 0.9097396  
3.132928 9.383376 1.099558  
AC139530.1 0.6556888 1.41185436 1.181361 2.273742786 3.105714174 1.120447087  
0.8960797 1.527683154 0.5006306 0.7170072 1.30701613 1.910203  
1.870824 1.379304 2.890302 2.024963 0.83813 1.066700307 1.154699 0.5704107  
1.212878659 1.012821 2.905798212 2.091536 1.388242 1.421001029 1.618765  
0.7203584 2.679231 1.216779 0.5768552 0.816766485 0.9227069 1.810273784  
1.596726 1.480024082 2.457327627 1.177916643 1.108575 3.11215 1.091636869  
2.273984 0.961826152 2.350338 1.187379982 2.865903 2.693689 5.243403 1.236798298  
1.261909 1.369878 3.603408 1.969530747 1.467848 1.876107909 1.647532 1.125828  
2.902132 0.4793239 2.460686 0.4356346 2.385549 3.018617892 1.297776  
0.8007099 1.054703 0.6695231 1.292176 1.414293 0.2870159 0.5788508  
1.729182444 0.9356168 0.958327 1.304504413 0.6964171 1.260096943  
1.287768 1.988197 1.719511 0.6669037 0.4451226 1.563733 0.356402743  
2.01401648 0.8071055 1.329488 2.494599 1.097405922 1.235441 0.7689565  
0.8206754 1.8546139 1.143917 0.9501519 1.171729764 0.5726873  
3.182317622 1.200780364 1.768226 0.651005438 0.6124404 0.804162 1.282295576  
1.813748 0.4821095 0.387020141 1.474536 2.120377107 0.809630305 1.18666  
1.807381259 1.668828 4.847875 1.933403 1.877075 0.8400711 1.605060402  
4.124094 1.693053 0.5887519 2.67477 1.029471 0.7877129 1.664701 0.5612869

0.6559948 1.629155 3.907842 2.911497698 1.199361403 1.264308 3.313847447  
1.295944291 1.300061 1.740293819 1.353653 0.8446681 0.127851439 3.101661106  
0.39382603 1.132560399 0.8103506 0.7727542 2.261668 1.25853 3.372653  
2.064295 2.307492 0.6308719 1.469955 1.036457608 3.441535 1.166279 0.555983049  
2.359802 0.7420199 0.933156416 2.222761 3.065892 0.608806567 0.9193093  
2.300286 2.884001 1.149059122 1.59451 1.660115 0.691910669 0.9603634  
0.921414138 2.221616 0.8533885 1.327501161 1.345177 2.544242249 3.18138  
2.346906 0.7803003 0.9828683 0.4661769 1.50554103 0.4402108  
0.7384225 2.180906 1.863453 0.7566197 0.7365212 2.055802 1.850049  
1.529945848 0.39029442 3.858162 1.006521 1.975789 2.033616 1.089726738  
1.120244 1.341960031 2.394189 2.588219 1.46685798 1.104670575 1.116166  
0.4286785 1.540150158 1.061867 1.40925 1.087627 0.9225279 1.038926  
1.944348 1.082474 0.8569465 0.3546269 1.344379 3.369101 1.590649 1.203678  
1.202523347 1.797872 1.177724 0.654352878 1.492017 0.7877204 2.86359 1.5119  
2.08301 3.077942488 2.941708 1.272191 2.509677 0.4610395 0.8524751  
2.109222043 0.9437225 2.830081 1.391608 1.660541065 0.831896624 1.466874  
0.8668925 1.093916 1.147548009 1.146924 1.740707 1.398238241 4.06941  
2.279773 0.8468825 1.97547 0.835061 1.14512 2.151563116 1.234498 0.669917186  
1.058403 2.567158 1.533813 1.273144 2.905397 0.9293794 1.747346 2.606974992  
2.171808 1.864832 1.688807721 0.7558361 0.9387196 1.052287 0.8315053  
1.085925 1.002788 1.343719 1.673436 2.367092156 1.742465 0.996642207 2.317161  
1.713311 1.634376 1.499043865 2.612795162 0.4471666 1.745317 1.646596  
5.389321 0.7933837 0.828605487 0.9874694 0.8544613 0.511808 1.532760632  
1.716688 0.5616686 1.144798864 0.6354683 0.869152581 0.647586 2.093388  
0.987721497 2.621143 0.9413784 5.0322214 1.830744313 0.8012498  
2.124036 2.47096 0.7065719 1.064582 2.370944 1.522947 2.249202 1.37104  
1.924592105 0.6661786 0.852323641 0.7394176 1.114984835 1.648905  
2.143216 1.5201596 1.627959 0.9063238 0.6712388 1.203360141 0.3752273  
0.4460863 0.808638343 1.889593873 0.6229362 1.633412 1.123481 1.596085929  
2.189933366 2.637954137 0.9713497 1.384168 0.09140293 0.5830486  
1.144004 0.7092296 1.291398 0.6848299 0.6151035 0.4091052 1.079226  
1.717241018 1.045659 1.544218 1.187752 1.564661 0.9252071 0.8852838  
0.6526577 0.7753531 1.135794 0.8592639 1.720017835 1.738568 1.701911  
1.608365 0.8560143 2.475663216 3.124169 4.290494 2.117632 0.7231834  
2.052935 0.9383351 0.8793705 0.922304224 0.4969953 1.082773 0.92885995  
0.9434644 1.935208 1.913757 0.623023 0.973248 1.255632729 1.435756449  
1.348096 1.966052 1.117292 0.938324443 2.444317614 1.834324829 1.446755 2.19081  
1.375041 3.656362 1.128061 0.9074998 1.343072 1.953416556 2.682361949  
1.223654 2.360371317 1.260562 0.994478077 1.021559 1.457383 1.87412 1.949984  
0.9458507 0.7419249 1.531587 1.454605 0.9910838 1.679099528 2.832333  
0.1439898 1.117145 0.6109701 1.708668979 1.411118 0.9393781 1.896829  
2.548029211 1.003993 1.454178 1.735179 1.245681 1.461854 1.040309 3.278897  
3.55784598 2.902319648 2.706815993 0.4149305 1.428349006 1.313595747  
1.214629 0.07074446 1.374431962 1.270333 1.128561 1.060744 1.888683934

1.211436 1.550494 0.920033 1.000752074 2.779662 1.395647 1.219354 1.282834  
0.9698856 0.8680321 0.9241884 0.5064612 3.135843 2.196005 0.9989985  
1.110297263 0.836617 2.358415 1.715553 1.15499 0.5851436 1.582065 1.923059  
2.02688715 0.959720568 0.880101283 1.035871 1.334665 1.874936 3.32344 1.31145  
1.554497608 1.308035 3.383782 0.6304709 0.5589904 1.628916 0.732043702  
3.445192 3.416812 1.315705 1.887137 1.074822 1.791703 3.335073 1.040809747  
1.337295 1.802522 1.175978261 0.886429 1.367473 1.364257 1.641588 1.519804  
1.899539759 1.360074205 1.490814304 0.7507951 1.345069 1.037551 0.5597875  
1.374571 1.431204 1.239863304 1.712016 1.24912944 0.3244676 3.760556  
0.5688626 1.000169 0.5623415 1.008826431 2.66938 1.076593 0.7490936  
1.587661 3.204639 1.892861 1.840675 1.742833884 1.428774 0.546123741 0.6499764  
0.876102 1.281308171 3.042324 1.523885 0.6850644 1.454428618 0.9162652  
2.068286 1.631327 0.991396737 0.6179863 1.606008 0.4941499 0.4598309  
1.64419 0.8697506 1.015705  
LINC01507 2.410264 4.172251225 3.369042 6.656761992 1.058985326 2.254796114  
1.07979 2.075233701 4.36674 1.313699 0.817509842 0.1609777 0.1588672  
3.227936 7.164806 2.657193 1.422846 3.377428743 1.764991 0.7506425 6.384439609  
0.1425259 1.251261654 1.126711 3.125693 1.369330783 6.570024 1.083393  
0.03806513 2.058648 5.495742 6.045899745 0.6179311 0.825373516 5.281453  
5.737054528 1.206468079 3.522122975 4.547301 3.467277 2.403009741 4.505946  
5.696945973 1.227458 1.658313015 0 0.7055698 0.7878854 4.458578013  
4.882645 2.804975 0.13594 2.669979365 3.090627 2.478086411 5.880396 4.416052  
2.427925 1.793591 3.956667 5.131084 5.389588 0.396886192 4.372049 0.9416603  
0.5788366 7.63565 5.223348 2.691854 1.228394 7.583637 2.99609444 3.003247  
3.046553 3.646932071 5.505976 3.171765973 1.009401 0.1980484 0.4201178  
4.277066 2.649606 6.169139 1.816814923 3.985536696 2.293388 1.364756 6.414249  
3.147624187 3.979733 2.364511 3.910675 3.653783439 5.385958 4.880307 0.501486569  
8.631143 0.421085733 2.899976489 3.941693 0.311971337 0.9501753 0  
0.147638364 4.678371 5.362821 0.556397154 6.47813 4.469165979 0.544740249  
3.405608 0.43306178 3.046019 0.0741012 2.273744 3.643063 1.134876 4.378343449  
0.5440779 3.416004 0.9942024 0.4662686 4.407093 5.222662 0.5366674  
2.974826 1.272185 3.751487 2.902187 2.509480359 2.725015486 1.280004 0.151437206  
1.305585948 8.029107 2.050626625 1.986334 3.146713 0 1.731335793 1.524047028  
1.614934739 2.474537 3.680499 3.148996 1.433068 2.207654 4.438953 2.183276643  
3.773575 3.097734 0.365459051 5.321656 3.681119 3.630179835 1.046038 4.863784  
0.24818613 2.697821 6.218434 2.412936014 2.555543 0.6080517 2.115116  
3.882439045 4.588676 2.809024 1.654143065 3.369066 2.949833676 0.8105216  
1.291703 5.410545068 2.815773 3.848825145 1.13033 1.860986 1.141425 3.159508  
1.196359 0.314054826 3.387228 1.131865 1.104844 5.927903 2.022984 2.248403  
5.170999 3.227158 4.83386836 0.044360818 0.5030062 3.147049 0 5.177549  
5.385696789 2.09084 1.588075441 4.070666 0.5944503 2.27814073 3.612328814  
0.4461011 1.698067 6.618935539 0.5665805 7.607874 0 1.489682 3.967203  
5.66171 0.7308704 2.062106 2.222436 3.129692 0.2363027 4.79463 0.1827256  
5.193789177 11.42501 2.694472 0.822550605 1.120969 1.942597 2.22464 4.935823

4.879205 1.638769001 3.319953 3.09851 4.275208 1.654396 5.481916 0.992204919  
1.974128 3.218066 1.84729 5.232752988 1.117447769 4.229116 3.904188 0.7141996  
4.158238105 3.182674 2.053713 2.054200975 4.162758 5.031496 3.826899 0.0634546  
4.754021 1.024517 5.502294256 3.570515 5.222339581 5.639422 2.844883 5.338464  
3.745912 2.207804 6.193364 1.539773 0 2.831486 1.617321 2.06628193 0.5307599  
6.060119 3.070802 2.871792 0.5489212 8.001167 5.452997 5.370426 3.083379159  
3.593467 2.723787968 4.004091 2.985932 0.2414918 3.972070046 0.513710187  
2.215368 0.750209 4.033616 0.1043207 0.5223059 2.105846967 5.593077  
13.38873 1.878775 1.413219049 0.2296007 1.975975 3.443472111 3.47535  
2.222725059 0.9568592 4.874412 1.802832734 2.142955 4.287995 0 4.567840036  
3.210216 3.842976 3.381498 5.314988 2.682726 1.015944 6.951587 0.2632374  
1.121992 3.077467584 4.675573 3.91805576 0.5533682 1.70941284 0.2320368  
6.219079 0.523375947 1.004332 1.591837 0.511401 0.227956287 0.956388 1.380437  
0.703496041 3.529915089 1.557663 3.274742 5.229101 1.219832179 3.405055551  
0.920736437 0.943723 5.032115 0.5209265 1.114882 2.99276 4.246924 4.189615  
3.32138 3.222335 1.052974 1.913568 2.556727513 5.210734 0.4005116 4.520186  
3.576236 15.92791 6.758394 1.356121 2.864113 6.473155 1.418203 6.199625365  
3.669816 1.321598 4.987421 3.890548 0.168183296 0.9305394 0.8490458  
6.082479 0.8773442 3.470084 4.785141 5.48321 0.900182886 2.061828 3.199764  
6.418285047 4.228596 3.663635 0.9103898 1.919716 3.314182 2.558059489  
0.069937676 0.9054173 4.857535 2.099745 2.723380001 6.466747056 0.823400167  
1.202453 8.303326 2.295103 0 2.592798 2.846254 5.605552 3.780680871 0  
1.134137 2.304603866 6.165778 2.593093059 2.765068 1.566108 8.721262 5.556705  
4.971679 2.485396 1.28239 2.23391 4.298735 1.588955902 2.562242 3.318996 2.2126  
1.331183 1.288108421 6.558531 5.24176 2.902811 1.107327387 2.479529 2.030486  
4.001704 0.2842089 4.628581 7.087017 2.753902 1.949223473 0.828851394  
6.206171971 1.945389 2.524582748 2.911411201 3.192359 2.142875 1.821774942  
2.849176 2.139672 1.102538 1.569756784 3.112535 4.581953 2.558183 2.474859643  
2.380291 2.013369 1.982927 0.2546178 3.900347 2.968269 3.507009 1.122504  
1.099464 6.242654 1.671055 3.142286792 4.064518 0 0.46413 4.111937 2.623947  
2.079039 3.885686 9.701222009 4.968890839 3.31015672 4.880985 6.166903  
4.155547 1.2223 2.196735 1.090296933 0.08109331 2.459581 3.204944 5.71813  
0.06811844 3.324750051 9.845325 1.503021 7.215617 3.999142 0.5484202  
1.806448 4.367851 4.70590692 3.871965 0.8663966 0.228297832 4.785692  
4.441724 3.023695 5.173297 3.889337 6.098711978 3.457102286 0.764606573  
1.547942 4.803777 5.438032 4.544232 2.437244 2.456803 2.909639642 1.470103  
0.35559103 1.565186 5.947209 1.727775 2.69988 0.02865185 2.099036635 2.26017  
3.685885 2.046375 5.234925 0.0384968 0.4661418 6.892073 4.339834787 3.36129  
5.404625982 1.842611 2.572207 5.616941003 1.974559 9.655891 1.491717 5.86099751  
3.829472 3.506718 8.030486 0.655335004 2.277307 1.727097 0.2738045 1.072794  
3.432262 2.299697 3.236986  
AC037459.3 0.4196437 0.775343353 0.6948748 1.847494369 0.826026892  
0.751140728 0.6879804 0.938839698 0.1625391 0.3986247 0.317051643  
0.8824387 1.396483 1.669081 1.013174 1.581896 0.782019 0.859114449 0.7957734



0.8521839 0.762955807 0.8552591 2.423245511 2.140576 1.10099 1.101519558  
1.080269 0.4531382 0.654388 0.8480434 1.114137 0.473165152 1.140567  
1.115504812 1.462554 1.758498297 1.241089012 1.638511831 1.415504 1.471628  
0.864868044 1.542763 0.423224613 1.69939 0.719144153 2.226014 1.223527  
0.4472324 0.626686917 0.322901 1.499723 0.8598332 1.828315567 0.4396873  
0.64712802 2.061208 0.2736712 1.37524 0.4698959 0.7457589 0.6174153  
1.41072 0.965515863 0.7613139 0.722484 1.191513 0.2757111 0.9915296  
1.022493 0.7613174 0.6288354 3.676734464 0.6378325 0.4175455  
0.980448267 0.7061556 0.350522243 0.8580477 1.547106 0.564551 0.8364752  
0.7314348 1.270326 0.397142816 2.197697399 0.4686517 0.2313995  
0.9048222 0.777333107 1.1309 0.408382 0.7030726 2.074020345 0.7712405  
1.095085 0.319518585 0.890791 1.468287671 0.732275766 0.4996601 0.556556865  
0.2274827 0.6637666 0.347191746 2.017704 0.1700267 0.443667718  
1.305049 1.912920318 0.66000379 0.9351292 1.287637027 0.8212096  
1.291921 0.7469753 0.5178956 0.5751759 1.129684979 0.6794444  
1.225545 0.4182203 0.6373711 0.6741971 0.890582 1.13149 1.11405  
0.4372131 1.424724 1.338502 1.744251802 1.239187434 0.6227801 1.424500961  
1.088960414 0.9346257 1.757893016 0.8322139 0.7687394 0.124739834  
2.700550532 0.683095511 1.144446163 1.424056 0.28959 0.9067706 0.4980377  
1.300255 1.679807 0.848840558 1.016366 1.946063 2.785728228 1.150768 1.536424  
0.891225802 1.696483 1.152014 0.630603353 0.90361 0.3985269 0.767221291  
1.142573 0.8420198 0.4035687 1.282428873 1.04428 1.039475 0.480653874  
0.3134395 1.133462244 1.288228 0.3815725 0.550834417 0.6285889  
1.756496387 0.4801212 2.820267 0.2468246 0.3775688 0.09995369  
0.623941288 1.056896 0.2579874 2.060634 1.646985 1.493679 0.4745446  
1.299208 1.662521 1.088191 0.431671087 1.957883 0.7752822 2.436045 0.2474129  
1.593843209 0.7036245 1.53661103 1.243747 0.395277 0.523420091 1.718505228  
0.5196009 0.1835971 1.640587755 0.6149498 0.4131729 0.7574704  
1.359588 1.367805 1.415355 0.6338986 0.2552276 0.1582414 1.335003  
1.762904 0.2801654 1.375053 1.324465941 0.822963 1.138006 0.491483825  
0.5332822 0.7298083 1.322919 0.5434593 0.9065102 1.501957774  
1.336359 1.110574 1.081047 0.04734935 0.707801 0.241376397 0.1219687  
0.7342148 0.4226455 1.504952445 0.50744319 1.238881 0.8575464  
0.9937011 1.754725099 0.8312377 0.7660724 0.735236522 1.04578  
1.120295 0.3251042 1.749501 0.8239864 0.6872897 1.936777936 0.8686089  
0.315537295 0.5303211 1.875808 1.323206 0.5875346 1.034412 0.6457185  
0.7264673 1.324761451 1.292364 0.738326 0.252708436 0.6025572 0.5344482  
1.985809 0.86916 0.684808 0.5919077 0.8435596 2.003266 1.19419233  
0.2143614 1.27137484 0.6211563 2.073912 0.9269189 1.673709502  
1.045217673 0.2836519 0.8592962 1.881544 0 0.9261465 0.373300331  
0.5828198 2.371407 0.6611484 1.533866449 0.7234629 0.5447942  
0.852399393 0.308518 0.937262538 0.2903464 1.376127 0.988545478 0.4398659  
1.241515 1.68265568 1.607738328 0.7864967 0.7375253 1.490265 1.477705  
0.8072742 1.619269 1.208823 1.206058 0.4321711 1.288839174 0.3259329

0.584375472 0.9457876 0.542417639 2.703243 0.7858585 0.509292376  
0.367998 0.3319291 0.2940598 0.280974775 0.620435 0.5869332 0.293385258  
1.154679282 0.2411416 0.4726335 0.5139788 0.626476236 1.59373978  
1.694858153 0.8418009 0.579873 0.0375488 0.3082051 0.4246999  
0.9526548 0.3901961 0.2780219 2.100467 0.5502693 0.7137958  
1.177996354 1.552601 0.5137406 1.516167 0.5096973 2.954458 0.9016213  
0.9127437 0.6557746 0.8875358 0.400869 1.20531079 1.181852 0.4911939  
1.628108 0.5063388 1.179698793 0.239691 2.292702 1.380106 0.4651765  
1.803208 0.4119103 0.8639895 0.687385108 0.2244542 0.6486794  
0.937818233 0.6104386 1.912953 1.812052 0.5844508 1.079634 0.620026599  
0.805325976 0.7577059 1.683738 1.054935 0.481835695 1.708622805 0.676048965  
0.7564258 0.9485089 1.494998 0.2877065 1.389168 0.3631338 0.9091186  
2.20868633 1.278708152 0.4478451 1.756694773 2.656189 0.39952492  
0.5524308 1.30172 1.409268 1.474685 1.35253 0.741027 0.9848479 0.5681517  
0.5975799 1.512290681 1.54792 0.1518228 0.4613701 0.5062335  
1.721399989 0.677572 0.4846468 2.04953 0.405356604 0.6444465 0.5383924  
0.8175761 0.4675199 1.426276 0.8187403 0.2564003 1.458502436  
1.718297395 1.887240477 0.4589189 1.072346577 0.521880905 1.244128  
0.1864824 1.545104072 1.346231 0.5083049 0.2103665 1.350720216  
0.1719637 1.025814 0.5832523 0.583132966 0.9083294 1.056776 0.8610439  
0.5437092 0.5463065 0.7042694 0.7499751 0.2970286 1.738552  
0.9209245 1.391209 0.577162022 0.9093948 0.4466158 1.592323 0.9153274  
0.6799121 0.3925406 0.4689769 0.286065786 0.551961473 0.562411389  
0.9147459 1.105867 0.587157 0.7720725 1.72487 1.407537658 1.16394  
0.8108772 0.5322584 0.4224717 0.3921888 0.392547798 1.03814  
2.093859 0.6995054 1.118666 1.806671 2.16699 1.066471 1.466565274 0.3945604  
1.561264 0.783711867 0.6495169 1.178012 1.544494 1.470581 0.7434189  
1.76123648 1.483748441 0.434018494 0.1631813 1.283199 1.37922 0.538198  
1.144939 0.9885564 1.389455795 0.6250576 0.164772571 0.1920987  
1.196861 1.416215 0.9540987 0.4414469 1.524514544 0.4528075 0.7047554  
0.5385302 1.388777 0.156087 1.217996 1.834545 1.038292182 2.507645 0.479353475  
0.2064699 0.04089855 1.419885092 2.057697 0.7258759 0.8208317  
0.826976092 0.465803 1.404684 1.623369 0.762739855 0.6958539 0.2937672  
0.1973605 0.777145 1.333212 0.8227258 0.5631606  
AC024337.2 0.05086753 2.695821989 0.3386795 1.965951618 1.415225704  
0.519878345 0.8485994 0.626986664 0.582157 0.2432646 0.090683344  
0.2874922 1.10956 0.4723272 0.3376774 1.327959 0.5546007 0.362814768  
0.6135378 0.4472808 0.619159306 0.6647557 3.438818281 1.971144  
0.4438985 0.759853744 0.9269384 0.1909388 0.115325 0.6959218  
0.1034559 0.650178907 0.8304939 0.826226005 0.8822653 1.518848857  
1.984254554 1.694729928 3.128442 1.705694 0.603632902 1.213471 0.293037229  
0.009547625 0.868016573 2.096532 1.211622 0.540224 0.416037124 0.4988894  
1.199278 2.18933 1.594857007 1.824301 0.917545045 1.724099 0.5095203  
5.957466 0.2727999 0.5030281 0.1847514 1.522996 0.876964627 0.748521

0.3522842 0.3975969 0.4778327 1.414979 2.456799 0.3148 0.7273749  
1.584527267 0.1824333 0.1231587 0.932539185 0.360002 0.01790297  
0.8935811 0.8526631 0.09570077 0.8023603 0.4314864 0.5913311  
0.598299796 6.117938947 0.1609061 0.08408021 1.84316 0.558944478  
0.7213767 0.1713803 0.2223628 2.178755071 0.3812351 0.6076333  
0.171354264 0.3164737 2.098277585 0.222430007 0.1806117 0.329566431  
0.2885937 0.2736764 1.082927667 0.9615071 0.6172417 0.473179608  
2.292938 1.917510053 0.577379526 0.1505476 0.52366361 0.6938682  
2.640859 0.7344233 0.5020213 0.6107517 0.579151794 2.099514 4.646492  
1.624954 0.6160395 0.4535413 0.7328533 1.149916 0.03449859 0.111089  
1.316038 2.660943 3.239334675 1.03944382 1.301859 1.988157011 1.082558073  
0.609172 2.008627479 0.811631 0.114326 0.393750957 3.207316943 0.092789186  
0.582200906 0.2609327 0.4299911 1.204083 0.4080573 3.285566 0.8133722  
1.073027418 0.7199165 1.056039 0.183149508 0.9213077 0.6646669  
0.207113611 2.132988 0.8815744 0.514473787 1.832963 1.687269 0.329069751  
1.349149 1.044161 0.4116668 0.465730192 1.746625 0.6750303 0.219803303  
0.3414885 2.272250528 0.6720635 0.2574632 0.35265567 0.7289541  
6.429791841 1.871048 3.040434 0.5680849 1.156098 0.3930964 0.763691062  
0.4461826 0.1658495 4.215605 1.681293 0.1867557 0.06384648 2.027581  
3.154143 1.719901604 0.099030728 3.228357 0.5843952 6.968251 0.6634239  
1.257189953 1.258578 1.261853221 1.651713 0.4549872 0.31407242 2.086434514  
0.1810677 0.1095966 0.829742685 0.4378257 0.8291546 0.1681676  
0.8756359 0.4866128 0.6957861 0.3749615 1.029715 0.0129652  
2.009872 0.3391202 0.1124317 0.8100027 0.68107217 1.707621 1.288954  
0.055225722 0.4587809 0.2862337 1.098978 2.49834 0.1969674 2.892668256  
0.816406 0.4199661 1.817893 0.02327685 0.678934 0.206894686 0.4871715  
3.939884 0.3682031 2.108242566 0.178184378 1.26864 0.3529408 0.7492356  
1.590052539 0.7909062 0.5567127 0.434858592 1.145344 2.923654 0.2499013  
0.5413265 0.4860842 0.6014835 1.644269334 0.8416361 0.261250606  
1.843826 4.127338 1.236726 0.3222332 1.799361 0.3967925 2.299024 0.015145355  
0.8062482 5.606772 0.226856603 0.6717756 0.1692183 0.3347039  
0.840132 0.3770484 0.2984418 0.6086613 1.338046 1.739173335 0.3358976  
0.540258998 1.378744 1.785474 1.623731 2.202005772 3.507428225 1.059765  
2.242983 0.8943355 0.4657692 0.2331983 0.140563722 0.6161109  
1.516917 0.1752278 0.650039564 0.8995929 0.1386361 0.963305648  
0.2450003 0.291418654 0.2165616 2.314498 2.532504706 0.5392583  
0.7663496 0.49631424 1.681454653 0.4901075 0.5668286 1.635189  
1.029119 0.3659308 0.8044087 2.369018 0.4512305 1.036182 1.664729142  
0.1504181 0.301223425 0.06787553 0.302205037 1.646491 0.2859425  
0.94930891 0.3796084 0.3867869 0.2149855 0.268983529 0.1060886  
0.3331541 0.144227647 0.705970184 0 0.5844574 0.689431 0.693753203  
1.152596001 0.836859553 0.07524141 0.5349358 0.3138016 0.1494929  
0.3844234 0.853096 0.8731102 0.2676553 0.8201397 0.1119357  
0.7729987 0.528139946 1.236667 0.8766814 2.166415 0.4147304 4.532115

0.7126529 0.3315718 0.800571 1.391209 0.2067583 2.75694628 1.187072  
0.3951328 1.768982 0.3944349 3.580193638 0.933925 2.233868 0.8579807  
0.3497457 2.343173 0.3404252 0.2113319 1.483247359 0.1216006  
0.5999848 0.197928981 0.4149399 1.253872 0.8578087 0.6551855  
2.132095 0.582713383 0.847553611 0.2714245 1.890852 0.1091798 0.055269557  
0.997020699 0.45133192 0.1510671 0.909544 2.363801 2.391554 1.196019  
0.5869844 0.5732918 1.510377074 1.094999023 0.6919308 1.469936824  
1.643744 0.454834271 0.4856381 0.7569823 0.6547279 2.192758 2.265048  
0.2722148 1.389298 0.4290731 0.09039052 0.526741737 4.780225 1.499501  
0.2408092 0.3659756 1.930734982 0.7703942 0.1718535 0.9417057  
0.933301831 1.039133 0.4933705 0.629811 0.653888 1.165077 0.2747776  
2.797406 3.376597115 7.562181873 2.630726108 0.2312438 0.894580626  
0.140494779 1.086464 1.125095 0.738140406 0.2611445 0.3700172 0.3309306  
0.521475037 0.349056 0.03970775 0.3842716 0.431862098 0.09674882  
0.4669744 0.1529955 0.1624019 0.6784756 0.254185 0.2820822  
0.150729 3.512595 0.1799651 2.051747 0.217326467 0.04257684 0 1.742048  
2.288435 0.06732963 0.950017 0.1585019 0.197760106 0.217074587 0.452422462  
0.3805047 2.726207 0.3965735 4.523819 2.161507 0.646740596 0.8211096  
2.706797 0.2003313 0.3545863 0.04887869 0.220543734 0.2538785  
3.324605 0.830492 0.9185069 0.2076919 1.653804 1.094473 0.485545003  
0.3879304 1.220348 0.291228697 0.1285238 0.4832847 0.8741749  
2.900804 0.3211648 1.932411148 2.198307906 0.670568439 0.2036344  
1.094921 0.2767436 0.1001103 0.944784 0.153726 1.61742005 0.8553076  
0.340207935 0.1686346 1.952019 0.06701474 0.9516615 0.07309962  
1.520725629 1.621795 0.6619792 0.8804158 0.9508332 0.1902956 1.39574  
0.882146 0.99139756 2.916858 0.399481632 0.02671058 0.1688875 1.060779418  
2.431763 1.744547 0.824029 0.579436193 0.1989188 2.876689 1.802429 0.215141841  
0.1947227 0.2619629 0.02425551 0.210979 0.8040532 0.54466 0.1970787  
AC063948.1 1.459888 0.971736392 0.2154687 0.937819492 0.593425626 0.752992241  
0.9983885 0.342750259 0.1684819 0.2992134 0.71106569 0.4546452  
0.5608557 1.295984 0.9968167 0.4957334 0.6976575 0.418367788  
0.2492409 0.2324584 0.439361827 0.4193044 1.732306993 0.9849488  
0.7471458 0.580104883 0.7838366 0.2013026 3.31478 0.9205798  
0.8084105 0.496374416 0.6925425 1.295045164 0.4227968 0.872171928  
0.892413478 1.345231526 0.4747012 1.519233 0.813481376 0.8248351  
0.389267872 0.8103011 0.933312338 1.463595 3.065727 1.947054 0.310919698  
0.446276 0.6166407 4.559192 0.548599856 0.8932961 0.494265256 1.004507  
0.6337471 1.364603 0.2597741 0.5033655 0.3895588 1.364813 1.801471361  
0.4874158 0.2557218 1.205136 0.3051675 1.012815 1.625542 0.05162683  
0.1341997 0.470099603 0.2524403 0.3534631 0.579951403 0.4066524  
0.495461143 1.310724 0.4661192 2.54256 0.5181205 0.2653622 0.7341295  
0.09295623 3.376874786 0.539763 0.6935084 1.493908 0.757649525 0.4403078  
0.5781842 0.3567448 1.388445741 0.587433 1.062071 1.559655363 0.8147298  
1.610458497 0.388781458 0.1599486 0.183560971 0.1597355 0.6732391

0.260607034 0.8563983 0.2847007 0.272815667 0.6153368 1.084377241  
0.226249403 0.3967976 1.528856628 0.3258634 4.665247 1.440761 0.6351241  
0.417344 0.936791162 2.625068 1.126787 0.4021732 0.2351555 0.03678144  
0.3863156 1.89462 0.445546 1.390149 1.030092 2.561429 1.617178635 0.785967269  
0.5699454 2.554320787 0.482865033 0.4571855 0.517101098 0.4869751  
0.1874933 0 2.756486507 0.195651228 0.413135765 0.9863186 0.3430607  
0.9831392 1.084119 1.002708 0.6873257 0.633510857 0.7533281 0.7123105  
1.22875791 1.491053 0.3503719 0.078383976 0.8206383 0.3705934  
0.438091085 1.518356 2.65563 0.560427091 0.9347058 1.871422 0.2928269  
0.586815846 0.5225677 1.024272 0.243320517 0.2766037 0.427237936  
2.384516 0.1628627 0.697119706 0.467795 1.790623565 2.153578 1.759158  
0.2035163 0.2739615 0.2559733 1.66308189 0.3032846 0.2159931  
1.253725 0.8576857 0.7517714 0.1087347 0.8978065 0.6254966  
0.424507795 0.574232646 1.627802 0.4219049 0.9078198 0.2720018  
0.424696978 1.599299 0.411773239 1.240341 2.448382 0.307183334 0.283394662  
0.2863436 0.6660845 0.097975316 0.9231801 0.9445617 2.393488  
0.4812237 0.8488236 0.4668059 0.5983126 0.4470141 0.191365  
0.5045154 3.44815 0.6223048 0.3870503 1.085675762 0.4029757  
0.4624089 0.560399009 1.187221 0.6076738 1.23196 0.6927429 0.6177838  
1.569686697 1.694541 0.4375521 0.8114489 0.3435639 0.5636809  
0.314355973 1.714681 2.439058 0.776377 0.738936517 0.262998261 0.4043604  
0.4341141 0.5750492 0.475081127 1.118729 1.035759 0.333426853 1.776963  
0.7024878 0.6433461 0.9334022 0.4270566 0.2192058 0.719443928  
0.7307329 0.542254413 0.8086327 1.811108 1.066789 0.5800155 0.7216949  
0.5205881 0.6039918 2.682526101 1.047212 1.409802 0.677648237 0.3122941  
0.3286375 0.5946531 0.18627 0.5962708 0.7158075 0.4936141  
0.9479723 0.649873794 0.2430301 0.039089048 1.434068 0.8020602  
0.6157299 0.742638895 1.044178491 0.9604747 0.7724777 0.994543 0  
0.2868319 0.345784284 0.1907776 1.140208 0.1251457 0.831524665  
0.2315912 0.1395174 0.959734555 0.04304975 0.116251583 0.2905842  
0.4248974 0.505128408 1.300297 0.2709279 0.61046215 0.457476373  
0.3215082 0.5652926 0.3892776 0.2792222 1.483401 0.9894156  
1.328961 3.368779 0.2750707 0.733469446 0.2895855 0.205834535 0.7513768  
0.393574804 0.77366 0.2693924 0.654392551 1.838478 0.3122073 0.4923875  
0.590160183 0.2446651 0.08780929 0.197109709 0.492839985 0.458257  
0.9899296 0.5860482 2.057514647 0.351491639 2.600412355 0.8329164  
0.2077788 0.1362259 0.4472634 0.6358848 0.4218837 0.5857733  
0.3362182 0.3646137 0.20652 0.1125926 0.136759471 0.6060592 1.19971  
0.1813387 0.2975669 1.34685 0 0.1063905 0.2775651 0.6255906  
0.8582991 0.996914471 1.480652 0.5832118 0.7524491 0.113045 1.880191619  
0.9017985 3.247208 1.410902 0.1985465 0.8333733 0.2598952 0.3975497  
0.573797315 0.4985588 0.2091901 0.57003139 0.3280966 0.7360748  
0.7791487 0.1981653 0.3025914 0.396959447 1.069917263 1.534288  
0.6164588 1.020606 0.116538976 0.957542759 0.666161151 0.9433493

0.6797354 0.2213798 1.186125 0.9807287 0.3126124 0.4094384  
1.100298589 3.441922317 1.160548 1.193286181 1.360457 0.762875662 1.178942  
1.439817 0.5243876 2.311776 1.051486 0.5317759 0.6213908 0.119492  
0.2779489 1.131753204 0.9799392 0.7010287 0.4959515 0.3781233  
1.273290076 0.3021263 0.6917835 0.618409 0.670156371 0.523719 0.7206241  
0.3669452 0.238894 0.5057767 0.5141014 1.320301 2.815129415 2.883722048  
1.095495791 0.2497415 0.330097891 0.405721586 0.6167728 0.3690285  
0.98405318 0.8448141 0.1418549 0.6105625 1.077568312 0.161001  
0.5274739 0.4799222 0.329702016 0.9336939 0.7754054 0.4892761  
0.2996293 0.3651021 0.8409082 0.5478294 0.2085697 2.864905  
1.245125 0.5243909 0.311861251 0.6284296 0.7801483 0.3781242  
0.474397 0.3549208 0.2921281 0.4253583 0.71351336 0.640799599  
0.185491883 0.2552822 0.5310069 0.2963738 1.892605 0.5989809  
1.077754203 0.1908581 1.708163 0.3318935 0.1495331 0.6012036  
0.125200086 0.8794495 2.040838 0.3511399 0.8635073 1.21007 1.502716  
2.993629 0.597216083 0.6048392 0.4531374 0.268656552 0.3853277  
1.106881 0.5320713 0.8362414 1.225955 0.879742707 0.942643824 0.964044096  
0.6830959 0.4322878 0.2723138 0.598083 0.7417506 0.7685253  
0.428001082 0.7013472 1.016242437 0.2986834 1.430363 0.8242754  
0.8360966 0.6743391 0.26848983 1.095181 0.3196038 0.2726191  
0.3263767 1.676185 0.7923454 0.7637654 0.470861395 0.4996424  
0.165626593 0.3942453 0.652866 0.849317976 2.07643 1.46303 0.1880811  
0.758682158 0.3413977 1.093808 1.16447 0.635094174 0.4660682 0.5452819  
0.4296105 0.1683258 0.6482379 1.432715 0.5540688  
AL683813.1 0.6285685 0.674379159 0.183998 0.47801266 0.611082889 0.33321374  
0.735168 0.360481168 0.2327372 0.2943388 0.094548204 0.5233642  
0.4132021 0.9091523 0.5111521 0.7662047 0.2803575 0.404546957  
0.3599459 0.2627288 0.220699977 0.7161242 1.087714298 0.7944687  
0.4907846 0.437096919 0.5055933 0.2696485 0.2812632 0.3772415  
0.8234406 0.415564179 0.7392398 1.111315817 0.3504254 0.604428012  
0.667320875 0.753354231 0.4931613 0.6759243 0.452409007 0.7053487  
0.054315781 0.6282419 0.612663688 0.8730408 1.25925 0.04657348  
0.180584283 0.06304869 1.111458 2.275104 0.425884556 0.3285271 0.192416252  
1.135313 0.5093495 1.124593 0.08155597 0.6321257 0.08153457 0.7964732  
1.918752926 0.204032 0.3532486 0.5329829 0.170324 0.337709 1.020677  
0.1815321 0.345482 1.018354432 0.1637907 0.158528 0.412704538 0.5345049  
0.111995889 0.8590091 0.3463331 1.037706 0.2137866 0.1499587  
0.7938745 0.128407728 1.382145741 0.1220101 0.1604302 1.244116  
0.253721378 0.2915491 0.2858951 0.3270397 1.265522035 0.2873138  
0.8200079 0.561116137 0.5388519 1.011205716 0.244115594 0.1272134  
0.17864959 0.1069843 0.3251741 0.327269933 0.5940657 0.1668458  
0.390565729 0.6911722 0.939613958 0.49248103 0.0896936 0.68797704  
0.2747612 0.6351391 0.430787 0.2725092 0.377352 0.617621012 0.5628267  
1.208501 0.275481 0.1870283 0.1662843 0.3219529 0.8872662 1.52668

0.3491493 0.6144541 1.367071 1.395106045 0.82119777 0.3629807  
0.850416755 0.694582107 0.2870664 0.894694175 0.4770033 0.1294996  
0.197414459 0.842822336 0.315313109 0.601825739 0.5485306 0.4146596  
0.7835119 0.4386846 1.219134 0.345257 0.512695518 0.3933486 0.5735442  
0.810113006 0.4793504 0.383997 0.182103792 0.4871721 0.3309444  
0.220061658 0.5200225 0.6892201 0.412886334 0.6838674 0.9331394  
0.2390256 0.715867555 0.7218637 0.4852782 0.198615008 0.1196457  
0.543231337 0.7845516 0.1499833 0.204269779 0.3084145 0.879623846  
0.7556579 1.907081 0.1277878 0.2457432 0.05893266 0.864405211  
0.2502823 0.1220597 1.539438 0.6175261 0.5979132 0.0318614  
0.5825231 0.8977116 0.709018039 0.177002309 1.542436 0.1942701 0.36213  
0.2596004 1.009231738 0.3862303 1.260938786 0.5747074 1.142022  
0.263018443 0.747361866 0.107877 0.05974771 0.381415502 0.3413577  
0.3042807 0.6568095 0.7554 0.7338665 0.6341771 0.4602081  
0.1764273 0.1161527 0.6399054 2.039376 0.1094085 0.1242146  
0.86852995 0.9845096 0.315233 0.185533632 0.1601348 0.8430613  
0.7413154 0.6089619 0.2190528 0.771588018 0.9044006 0.40295  
0.2581508 0.05033549 0.3303392 0.157907109 0.1319761 0.3465987  
0.433863 0.752674936 0.165136416 1.06637 0.159005 0.5888267 0.590640125  
0.678016 0.5766456 0.340207527 0.4101149 1.102729 0.0807913 0.9142887  
0.2359707 0.3785076 0.680619066 0.3383847 0.060529982 0.3536671  
1.102733 0.573082 0.1238251 0.3897105 0.1225788 0.3447691 0.449161649  
1.189556 0.78784 0.120139718 0.7794546 0.06190537 0.471036 0.3007512  
0.2995184 0.5670048 0.2727471 0.8779659 0.727698586 0.1220787  
0.314163005 0.6431788 0.671484 0.5115232 0.746083873 0.538314055  
4.652342 0.5266129 0.6982742 1.387486 0.3859318 0.188168673 0.267529  
3.644764 0.1833507 0.634568996 0.2956791 0.07592248 0.254438131  
0.06487417 0.248180567 0.1915805 1.173888 0.545531986 0.549252 0.3529895  
5.59630762 0.67503534 0.1312186 0.2886901 0.5160129 0.6732418  
0.921873 0.6937329 0.5303418 0.6029689 0.1934427 0.391463191  
0.04848815 0.191280165 0.6479235 0.472283969 0.6400873 0.09021403  
0.333548115 0.4727457 0.08961587 0.2404654 0.101062131 0.2458  
0.1654062 0.143567449 0.512809266 0.1778752 0.2131118 0.163918  
0.781156061 0.69300222 1.333450901 0.2440609 0.2413587 0.1625186  
0.1085901 0.2088498 0.3464083 0.2819851 0.1688889 1.42859  
0.1945106 0.2403691 0.266200634 0.3089123 0.4896429 0.531358  
0.2722556 2.988091 0.3060702 0.2538496 0.2987707 0.4251568  
0.6287463 0.671486369 0.890963 0.1627548 0.387419 0.2839235 0.851253788  
0.1051586 1.436654 0.3975765 0.09474709 0.9366614 0.13599 0.1612937  
0.565373314 0.1586093 0.2057821 0.129746832 0.1854104 0.7791049  
1.149683 0.4379861 0.4855476 0.216017141 0.558110993 0.2943656  
0.7741481 1.541383 0.102444634 0.569596169 0.349835939 0.2907794  
0.3254391 0.7005812 0.476651 0.6773787 0.151423 0.1256865 0.907151122  
0.582579095 0.1676027 0.531295953 3.51658 0.431108165 0.8468538

0.6436907 0.2210763 0.8377591 0.93109 0.5453727 0.76362 0.1275492  
0.153581 0.648833359 1.107546 0.1949348 0.2335557 0.4748467 1.104068543  
0.3276721 0.4198914 0.5842968 0.25714987 0.2912608 0.2762505  
0.1075222 0.1020009 0.6888975 0.2905235 0.5049462 0.792154602  
1.150318782 0.924790912 0.1829479 0.24872187 0.101900915 1.232226  
0.571558 0.675261429 0.5602965 0.1157918 0.2252309 0.921470696  
0.1769117 0.1545602 0.1643688 0.193218345 0.2965815 0.4490083  
0.2032353 0.3135617 0.2357972 0.4386508 0.2981174 0.170249  
0.7543655 0.4899361 1.103037 0.111895687 0.6006544 0.6707239  
0.5381608 0.5421298 0.196112 0.3347544 0.120187 0.036655733 0.176031451  
0.19217586 0.05877356 0.4371491 0.1628313 0.4943599 1.041202  
0.741170705 0.3415431 0.7507881 0.1174594 0.08450252 0.130865  
0.121850217 0.3073145 1.104887 0.2806115 0.5421956 1.225814 1.311771  
0.7093198 0.463625908 0.1569749 0.4481263 0.30926363 0.2121689  
0.6795649 0.6556461 0.6973001 0.7441169 0.773345726 0.83486989  
0.169490324 0.1658473 1.010567 0.2051827 0.08836139 0.3788057  
0.2297888 0.633035692 0.4462471 0.232718052 0.04376005 0.2886827  
0.9178098 0.7601775 0.1651326 0.856409608 0.2947128 0.3669558  
0.3651783 0.2049317 0.307209 0.5970157 0.6120198 0.495788222  
0.6797377 0.112316563 0.1584297 0.02236004 0.54256068 2.309568  
0.4225724 0.3227958 0.762201558 0.1457671 0.7305067 1.079882  
0.187994008 0.5121268 0.1867539 0.1753389 0.1373992 0.6074112  
0.6996895 0.2435296  
AC002128.1 0.8090963 0.629584907 0.1929039 0.926037022 0.841192506  
0.401271175 0.4232163 0.431516166 0 0.09301334 0.218441093 0.4522586  
0.3486948 1.583692 2.804324 1.408269 0.2081986 0.390160904 0.1394621  
0.5029429 0.18028538 0.5318068 2.294027996 0.7913596 0.5359787  
0.480883094 0.5183379 0.07509219 0.5180005 0.7410324 0.5193578  
0.200593565 0.6458504 1.207731588 0.4573779 1.349590042 1.104617202  
1.071440124 0.8049022 1.230596 0.462406362 1.611707 0.064537412 1.445629  
0.569708015 1.072435 1.334215 0.5187946 0.072489275 0.1040469 0.5818315  
1.118896 1.265078337 0.6902571 0.129063556 1.540486 0.2364076 0.5408547  
0.08479092 0.9857988 0.07265885 0.973314 0.84622922 0.1818214  
0.07949358 0.8795616 0.08853996 0.7556235 1.27495 0.1155506  
0.5756982 1.315214685 0.07847349 0.05650837 0.346144223 0.2730495  
0.209465626 0.7486915 0.1883669 2.213061 0.3037183 0.1732298  
0.7302758 0.086689004 1.562937107 0.1812138 0.05446326 1.246536  
0.439642211 0.3583608 0.06740029 0.07984622 1.771000101 0.9457233  
0.5869424 0.188692078 0.5470558 1.201503485 0.225598689 0.07955449  
0.051355518 0.09931059 0.328413 0 1.201791 0.1416031 0.22389144  
0.4845845 2.06298501 0.436057126 0.05920719 1.29904326 0.4167679  
0.9595959 1.17727 0.2764082 0.3113649 0.742586794 0.358256 1.658588  
0.2318542 0.07310033 0.2744127 0.7467409 0.5889608 2.493041  
0.452086 1.001812 2.070236 1.049145332 1.290038403 0.2126076 0.642614443



0.704120565 0.2273928 1.243101086 0.3814798 0.1049113 0.142161021  
1.408264043 0.206788199 0.631861876 0.5431316 0.4159105 1.015593  
0.5616813 0.9351042 1.059762 0.643314202 0.4880789 1.109748 0.664629832  
1.223662 0.4990354 0.160818304 0.9322866 0.1996843 0.290527596  
0.6951207 0.572366 0.222994087 0.7125092 0.9034226 0.2457757  
1.094503964 0.7797368 0.7989067 0.196660136 0.05732327 0.956239239  
1.369829 0.3037646 0.312057128 0.4653394 1.276980417 0.6143283  
3.200753 0.0455508 0.3211883 0.1432291 0.516984938 0.2909178  
0.1074296 1.472322 1.599719 0.701086 0.02704098 1.265216 1.11665 1.124318923  
0.038946702 1.876866 0.3497418 0.8366533 0.2232236 0.5971417  
0.4359689 0.897994881 0.7977349 0.8611338 0.114589059 0.933817022  
0.1780253 0.1419831 0.603039997 0.4209031 0.2451139 0.3637522  
1.230937 0.9012002 1.867975 0.3766322 0.0952859 0.07138515 0.7151605  
2.966716 0.1702355 0.1122971 0.794982831 1.325572 0.936391 0.437097187  
0.262442 1.424855 1.034009 0.3578053 0.09489234 0.836489396 1.106205  
0.1904242 0.7062907 0.04272005 0.677539 0.117264679 0.1444326  
0.3352062 0.2027291 0.612547988 0.098106635 0.8470198 0.1349485  
0.8250441 0.655714827 0.6350539 0.9530477 0.373136153 0.6270327  
0.542818 0 0.7381594 0.1593056 0.3679679 1.252417809 0.3748063  
0.112376653 0.3536533 1.842546 0.6632433 0.2380005 0.4576654  
0.2912936 0.2867556 0.250166681 1.100903 0.8414408 0.044608965  
1.019336 0.04903685 0.4436486 0.377202 0.9267825 1.335094 0.4419206  
3.919327 0.626260434 0.01813157 0.204140245 0.7642179 0.8263446  
0.5653825 0.814787347 0.697020515 4.145896 0.7821445 1.450257 0.09158862  
0.22928 0.193482643 0.1779151 6.109336 0.171172 0.596509403 0.1871801  
0.05204438 0.265193494 0.06423565 0.411972269 0.06774816 0.7925006  
0.602972178 1.572744 1.010646 1.36632966 1.19457167 0.08994951 0.112465  
0.596986 0.7499424 0.7803726 1.59936 0.9143731 0.8811069 0.143654  
0.769520263 0.1080245 0.076782765 1.588294 0.097877199 0.7130107  
0.06699457 0.603092903 0.6041661 0.08318796 0.0816338 0.520350612  
0.2190426 0.1474003 0.147056259 0.866697089 0.9013426 0.2110142  
0.3080476 1.213749027 1.00960438 1.818816958 0.07767602 0.09688507  
0.1270413 0.04449155 0.1824654 0.2057993 0.01820933 0.12542  
0.9248843 0.2567948 0.2380032 0.10203118 0.5053535 0.3835967  
0.9470307 0.2378611 5.735932 1.387685 0.1885133 0.1035405 0.658913  
0.7826441 1.436811009 0.7594537 0.2417293 0.5613744 0.158135  
2.122569201 0.2162567 2.739426 1.18099 0.1185026 1.58546 0.1454236  
0.1711137 0.411623982 0.2107752 0.104046 0.279089556 0.08159357  
1.176768 0.6721212 0.2513345 0.5267552 0.23445743 0.583318762  
0.7313205 1.337941 1.72325 0.021736354 0.939983179 0.474407355 0.3678944  
0.190172 0.6606531 0.2654772 1.138177 0.1999102 0.1018223 1.499020279  
0.89317943 0.04329211 0.667699994 7.23178 0.199203655 0.6860607  
1.374968 0.2934197 1.527619 1.830442 1.09103 1.208663 0.2005842 0.8087327  
0.826003547 2.052694 0.1494319 0.2775083 0.3224044 1.424931906

0.235651 0.3440761 0.5822076 0.249989434 0.2093182 0.3678528  
0.1368821 0.071292 1.233616 0.2450471 0.2686439 0.719534846 1.249732542  
1.452993543 0.07763453 0.228682833 0.184979581 0.4601513 0.09177283  
0.930817176 1.083302 0.2778109 0.1281145 1.397313577 0.1051022  
0.5902932 0.0651004 0.122989236 0.1843927 0.3535286 0.05615859  
0.6892556 0.2723891 1.809722 0.258853 0.3112123 1.775421 2.291389  
0.6724242 0.116334069 0.677225 1.387941 0.501519 1.256452 0.119157 0.1362163  
0.07933603 0.09678653 0.059759608 0.190284365 0.1269711 0.6602743  
0.06909798 0.4236007 0.6585563 1.244397956 0.1779902 1.557597  
0.1238067 0.1673416 0.1794143 0.081731257 0.7274427 1.099651  
0.3572352 0.4670674 3.851897 1.763715 1.011367 0.607582934 0.1654577  
0.5916208 0.183731818 0.09951186 0.5275962 0.942777 1.135478 0.5640277  
0.829065443 0.684764523 0.167822112 0.05096326 1.662187 0.2158609  
0.2624751 0.5349463 0.1911228 0.532192946 0.2790662 0.066898312  
0.07427887 0.5335705 1.783388 1.484598 0.06288743 0.961489564 0.3793558  
0.1021905 0.3559343 0.304372 0.3041853 0.8185009 0.8682927  
0.702584523 0.8231887 0.259492531 0.05882637 0 0.730068906 3.22739  
0.6003321 0.1637071 0.360197524 0.1018817 1.057155 1.269738 0.406131651  
0.3622044 0.1109494 0.1335485 0.1883725 0.2418132 1.261891  
0.4004524  
AL022322.1 0.132381 3.111112545 0.364718 2.611658477 0.941695655 0.711255257  
0.2880588 0.430590477 0.1114003 0.07913599 0.420375521 1.172385  
0.7021199 4.254976 10.15007 2.632318 0.9840881 0.874134678 0.1757847  
0.6516945 1.010961446 1.91853 4.05472261 3.717126 1.337635 1.142172853  
1.253278 0.1242279 0.2250969 2.511637 0.380104 1.630074416 0.7692876  
1.883825293 1.185306 2.340894939 2.006217739 2.240496415 2.921868 2.560084  
1.434330968 2.648994 0.16015006 0.7081499 1.009810438 1.105977 2.094629  
0.4659135 0.246696229 0.2508162 1.726827 5.849264 3.007397752 1.603186  
0.326808325 2.597683 0.2458331 2.887282 0.09446948 3.111918 0.1888894  
2.972659 2.841073661 0.487 0.1690834 1.981697 0.1614215 0.8405554  
2.96537 0.1638512 1.047048 5.38512955 0.1780412 0.1068388 0.910087963  
0.6022883 0.218399364 2.534955 0.113006 0.429625 0.2740651 0.2280948  
2.286805 0.3318985 2.94397569 0.2426862 0.2123801 2.079521 1.057578164  
0.7410624 0.2484921 0.3868428 2.309908886 1.807133 0.9883405  
0.75810411 0.07182661 2.359020423 0.319899886 0.2115161 0.048548226  
0.1126583 0.2465423 1.723134434 1.963003 0.3639388 0.101016045  
1.907726 1.806816148 0.598384675 0.1574176 2.369953006 0.7264113  
2.167913 4.046416 0.293961 0.5187822 1.052991183 1.320822 3.560044 0.09669711  
0.1554849 1.079803 1.681207 1.680737 0.3198462 1.093573 1.644362 2.258157  
3.347308065 4.406901472 0.5168202 1.759616494 1.811134441 0.4836659  
3.768579233 1.056121 0.0619853 0.113391519 3.264812761 0.120740337  
0.557257586 0.3229716 0.8279362 0.9200735 0.4778798 6.075407  
7.877305 1.247324277 0.7550159 2.737225 2.031137683 1.640512 1.339451  
0.704854088 1.489701 0.6969926 0.476339558 1.679313 2.075868 0.27668073

2.235648 1.615879 0.4065962 0.631890276 1.543331 2.031747 0.150158021  
0.05689925 0.805096051 2.976701 0.1292218 0.774372051 0.5464409  
5.376574933 0.9548816 8.137344 0.107652 0.4140421 0.1918162 1.759408336  
0.8823401 0.3332343 7.23347 2.964053 0.3810881 0.04793027 3.139643  
2.292407 3.794856774 0.345166169 2.817958 0.5579273 1.256996 1.294903  
2.497046791 1.870886 2.379173568 1.30087 2.793709 0.258503262 2.585852685  
0.1767085 0.213916 1.191976032 0.9766511 0.9992711 0.2930694  
1.418197 1.571479 1.840689 1.008791 0.2533421 0.2530611 2.134948 4.280361  
0.1426423 0.2047342 1.552681052 3.546176 2.253776 0.175162464 0.2791079  
0.6734834 2.090735 1.733512 0.2402817 3.570297851 4.556418 0.2796659  
1.402132 0.0151443 2.054024 0.118772718 0.2048061 0.339517 0.1848026  
2.812078291 0.243452333 2.418608 0.3827152 1.3922 2.714029404 1.878205  
1.707544 0.352739085 1.066962 2.229529 0.1474653 1.560195 0.3614336  
0.4493106 4.477889965 0.8092944 0.669272369 0.6563512 5.835114  
3.636529 0.3144753 2.958546 0.6970313 1.336039 0.167514884 1.875821  
4.008294 0.115968782 1.837751 0.1303771 0.6048996 0.7671219 0.7359416  
0.1019398 0.7310862 4.62787 3.050846813 0.2442512 0.454884134  
2.329878 2.424331 0.8142415 2.553371831 1.758731458 1.959633 1.853338  
2.223857 0.1623413 0.4985172 0.289601376 0.1681896 3.39943 0.143427  
1.471783927 0.4695931 0.04919943 0.310237525 0.07970061 0.18447739  
0.2305612 2.9218 1.910428773 1.062972 1.612238 7.74984473 3.085331754  
0.1275488 0.1694431 1.246914 1.964376 2.203084 3.281913 2.343226 1.362065  
0.3783038 1.867135279 0.1531792 0.11976611 0.4901864 0.508897685  
1.155488 0.07124893 1.048623702 1.643957 0.1179609 0.3038623 0.567584113  
0.1423599 0.09289524 0.135542154 1.471051939 0.2974906 0.3366215  
0.3734045 1.455342928 1.710510882 3.367145359 0.09178743 0.3571969  
0.1261016 0.1656092 0.3751683 0.3433226 0.0774627 0.1444999  
1.909375 0.3095157 0.1885971 0.343616522 1.942345 0.7932483 3.069471  
0.5509037 8.905375 0.6446056 0.3024854 0.2936418 1.518305 0.5801189  
2.061373486 5.44981 0.1028319 2.825911 0.3214052 1.753542652 0.4259067  
4.809403 1.629142 0.1785395 5.047404 0.2291237 0.493368 0.57201084  
0.3516237 0.2766331 0.508821634 0.4772626 1.779905 2.691781 0.461215  
0.9603528 0.507441415 0.631244868 1.206094 2.756877 0.6393077 0.154111207  
2.105982131 0.784830219 0.3742457 0.752814 0.8899684 0.5395752 3.22788  
0.271662 0.1925125 3.833702148 1.899798258 0.2762478 1.075910668  
3.718076 0.726355585 2.906039 2.208657 0.5844797 4.419685 2.124948 0.5000681  
1.36172 0.3002309 1.455537 1.132233939 3.329395 0.211895 0.4044387  
0.4571708 1.763980436 0.6392513 0.3049383 2.66364 0.787746809  
0.9794867 0.331026 0.2911491 0.1010923 2.572459 0.5892016 1.349156  
2.302576646 3.353580171 4.136798346 0.2091636 0.72337871 0.04769124  
2.446862 0.4880035 2.39813299 1.913175 0.2157274 0.2321299 1.289264847  
0.1596808 0.1395064 0.1615471 0.319731962 0.1162087 0.7291709  
0.2189911 1.003783 0.3724543 3.815075 0.6761532 0.3861378 4.998444  
5.400697 2.886506 0.164962197 0.6094262 0.3967956 0.3778017 1.380154

0.3473171 0.2317863 0.1687482 0.205865556 0.201256015 0.257559298  
0.3150797 2.48112 0.2841456 0.7408233 2.534697 1.927444113 0.3154886  
3.325568 0.4069764 0.3361624 0.5088205 0.115895265 0.7382424 5.44559  
1.055335 0.8335889 1.16281 2.656053 3.764572 1.938499074 0.7785107  
2.142244 0.296059645 0.1567869 2.146818 3.298179 1.574725 1.080802 3.404394574  
1.902633098 0.985885895 0.04817741 2.163504 0.5401618 0.3070574  
0.7716346 0.2516548 1.333218226 0.8285326 0.094862087 0.1711576  
1.405124 0.7266815 1.30025 0.133762 1.278183964 0.6206862 0.374342  
0.7330404 1.413492 0.5271885 2.417995 2.30858 1.120801269 5.098613  
1.217777329 0.1355511 0.2197619 1.923985195 6.995435 1.586464 0.1326499  
1.842390048 0.1264101 2.40637 4.134028 0.455917969 0.4006137 0.5637543  
0.1609665 0.1224268 1.437509 1.589378 0.8883999  
AC104986.2 0.9152288 1.530282933 1.117489 1.705641054 2.959319897 0.858297923  
1.94626 1.581048317 0.8401925 0.8455402 0.375455893 1.851582 2.349395  
1.560002 2.775457 2.129847 0.6030453 1.460433869 0.4557392 0.5564319  
1.270796274 0.8782221 1.295811218 1.095706 1.834288 1.028583628 0.6396332  
0.736167 2.859292 0.9181572 1.209425 1.196414738 1.277832 2.69091073  
0.8855368 1.063182681 2.629737565 1.668048822 1.721644 1.948159 1.043152246  
1.762852 0.949039625 4.427359 1.18472614 4.848434 2.165842 3.421496 0.736491035  
0.6120147 1.338569 6.34214 1.293278225 2.672836 1.971858233 0.8905456  
6.952873 2.849618 0.2914768 5.208674 0.1942668 2.161939 4.392008249  
1.026281 0.5100978 1.201965 1.082185 1.114647 1.080843 0.8238555 0.1338465  
2.168489055 1.216917 0.6547039 2.005207411 1.108592 0.461213478 1.103013  
2.363204 4.296889 1.033514 0.5293278 1.138974 1.158895103 3.555098733  
0.4845083 1.419771 2.979953 1.175464439 1.077912 0.3604142 0.9962567  
2.769583872 0.7400679 2.39318 1.051047978 1.029275 2.100442124 0.732432436  
0.9039902 0.366155832 1.274521 1.342935 1.039684903 1.748963 1.467083  
0.163258639 1.295626 1.838590149 0.902616041 0.8706574 1.821328689  
1.114306 2.739599 3.968773 1.319693 1.290362 0.700744442 6.896617 1.609799  
1.057485 3.400781 0.7336929 0.9457339 1.456593 2.856687 1.457592 1.761224  
5.322267 3.927116631 1.348306166 0.8526684 2.429105919 2.407971677  
1.747932 1.719134351 1.214234 1.121999 0.570140514 1.972275558 1.203340864  
1.359760268 2.107978 0.8981645 2.149672 3.424009 2.682004 1.599539 1.860428742  
1.146791 1.086549 1.654457854 3.390655 0.8259724 1.250843231 2.232215  
0.7392363 1.116619879 1.032518 2.589783 1.117904566 1.621298 3.952582  
0.3650704 2.215671032 1.216116 1.253753 1.051614199 0.6130573 0.372849423  
1.28425 1.84092 1.529627398 1.283051 2.258652651 2.716475 3.544864 1.177288  
0.9368248 0.8509989 2.027306549 0.9938841 1.687493 2.917659 1.824914  
2.374345 0.8314389 2.039622 2.138916 1.10081574 1.249574198 2.656667  
0.9350992 1.970643 1.302173 1.563985307 1.472391 1.800716051 2.303522  
1.883782 1.253352096 1.601677021 0.8567703 0.9490452 1.856632233  
0.9719035 1.146875 4.11127 1.302741 1.69318 1.227431 0.7086265 0.2547644  
0.3499125 2.415301 2.773448 3.641247 0.9865257 1.76459347 1.388435  
1.712999 0.863792062 1.929639 0.952403 1.843076 1.860169 1.486028 2.370698999

3.098482 2.43657 2.481895 2.055959 1.374261 1.119745429 1.489502 7.169885  
0.6194671 1.801535871 1.180377722 1.178866 1.010267 0.8823629 1.563642014  
2.086033 1.85946 2.53568928 1.484889 3.45315 1.026645 1.266086 0.8092723  
1.093144 1.62644815 1.138766 0.540827427 1.390525 3.886371 1.536863 1.128054  
2.663244 0.8112783 1.752443 5.23945586 2.278814 1.546701 1.033675809  
0.6618785 0.8849861 1.459909 1.008519 3.964678 0.3844205 1.230788  
2.363694 2.1065317 1.696734 1.442488737 1.702731 1.790363 2.787112 1.524938845  
1.753988467 1.779045 2.971716 2.119114 2.448791 0.9808355 1.264539195  
1.078228 1.137207 0.4576599 2.232828882 1.000921 0.3710673 0.99266112  
0.9875385 1.275402239 0.6520938 1.695117 1.259497806 2.161459 1.249744  
5.47970107 2.851703046 1.603311 1.50348 1.509874 1.058252 1.555369 2.75485  
1.973469 3.668871 0.5486936 2.148896585 0.7701959 1.149640045 3.197438  
2.486080848 2.768769 1.52254 2.111580916 2.532169 1.201059 1.036749 0.695626608  
0.5368466 0.5692584 0.707727596 1.263967812 0.6648015 4.266652  
0.7970536 3.817860716 1.086756649 4.322615274 0.2769082 1.191584  
0.1358674 0.4163473 1.219637 1.424157 2.580357 1.2575 1.309155 0.5492707  
0.7112096 1.500395356 1.102258 0.8119463 1.537323 1.483919 2.1269  
1.151451 1.193744 1.107339 1.578212 0.6658092 2.711702759 2.399728 3.037647  
1.726079 1.127475 2.81286562 3.019499 3.587442 1.922014 1.188144 2.784454  
0.8640375 0.7930071 0.572287322 1.52489 1.043198 1.030462994 1.145316  
1.363399 2.088452 1.502093 1.341311 1.682637974 1.846906773 1.190195 1.676827  
2.705524 1.046090653 2.312160728 2.597231646 1.111933 1.821981 1.413102  
3.738292 1.521563 0.7126622 0.6806015 2.433372017 3.208982151 1.446868  
2.109804192 1.922242 1.217388952 1.31694 2.527409 1.344877 2.042185 2.070548  
0.6777033 2.390486 1.549308 1.330644 2.061241133 3.759078 0.849009 1.154175  
1.023634 2.05609222 0.9313876 1.839901 1.351045 1.373918537 1.305852  
0.6430722 1.524915 1.096021 1.164106 1.224899 1.915384 3.639638566 2.368580369  
3.156437288 0.913309 1.458015082 0.179846177 2.125063 1.533572 1.50724762  
1.737844 0.8135194 1.44627 1.740043266 0.4415875 3.214969 0.7832606  
1.589366168 2.355481 3.222354 1.163665 1.444397 0.8323229 2.451571 1.202053  
0.1733507 2.949539 2.235327 1.961291 1.732940281 1.775865 2.334286 2.681807  
0.7570377 1.168156 2.440135 1.20201 2.13490708 1.43800489 0.693764049  
0.8911365 1.471137 0.8128832 3.548733 0.6602894 1.228477723 1.618025  
2.744799 0.3310201 0.7456977 1.598991 0.749223675 5.339084 2.442561  
1.655566 2.411458 4.626394 2.668527 2.816746 0.487345469 0.8445465 2.146738  
0.714532162 0.9460028 1.59462 1.260344 2.201868 1.71182 1.939576787  
1.929808638 2.051215226 2.997712 2.056255 0.5431943 0.456154 1.923476  
2.007507 1.28062429 1.678804 2.206001192 0.3475469 3.515548 1.973055  
0.7004729 1.71504 2.517162811 2.106576 1.229513 0.5438034 1.586899  
2.936901 2.674727 2.357815 1.842364354 1.453455 0.363419614 0.5111702  
2.782178 1.657336165 3.550226 1.605098 1.438161 1.341397246 0.6809986  
1.834745 2.322811 1.176356766 0.7747362 1.137135 0.7498399 0.6715314  
2.387195 1.389252 1.070683  
SEMA6A-AS1 0.1620525 0.356290689 0.5311391 0.628196514 0.325954076

0.850258017 0.1459131 0.39030398 0.07900007 0.1068947 0.201729571  
0.5532534 0.2454496 2.47861 0.411758 0.7560889 0.3177806 0.689397354  
0.2393001 0.4484499 0.417914012 0.7414974 0.939909727 0.6902168  
0.4388773 0.41448757 0.6921132 0.2786737 0.468084 0.2985877  
0.1143192 0.570783789 0.6772914 0.404825595 0.7476734 2.207063248  
0.63582202 0.691655635 0.8209604 0.9595036 0.664269867 1.357606  
0.295517014 0.2454303 0.312588703 0.6792677 0.7444196 0.2235823  
0.208268939 0.2167294 0.9330196 0.5089943 0.454337077 0.5556317  
0.297974335 0.8822036 1.013174 0.5598717 0.1392073 0.2360249  
0.452305 0.5055082 0.929615165 0.7182879 0.262652 0.4703155 0.6041624  
1.267966 2.283827 0.01383285 1.078721 1.515433535 0.1690966 0.3111789  
0.466175147 1.027838 0.296482734 0.3402196 0.197745 0.2649311 0.5057189  
0.2310781 1.212996 0.193026289 0.745619859 0.2530914 0.3080668  
0.2738734 1.42666706 0.4611779 0.07745911 0.3823436 2.148109955  
0.6958574 0.4110464 0.513895215 1.484427 0.481293997 0.283573326  
0.428565 0.153697438 0.1783308 0.208139 0.06982684 1.349459 0.8963191  
0.255843042 1.122051 2.389750488 0.414244077 0.1541606 0.557566404  
0.4365579 0.6834126 0.2297835 0.1985371 0.3410596 0.80791615  
0.4117221 0.6283 0.07347135 0.1470172 0.3744972 2.187806 0.5869622  
0.5968963 1.012369 1.158222 0.6577111 1.544828488 1.659460563 0.4254085  
0.445657553 0.482228847 0.510408 0.723547532 0.3196753 0.08791439  
0.038291516 0.77871051 0.074265398 0.653102075 0.2705656 0.3906575  
0.9422386 0.5809559 0.6655559 1.67587 0.64124904 0.8923724  
0.8420114 0.502079429 1.326378 0.7168894 0.682569543 1.68409 0.2978895  
0.326060487 0.6102406 0.4348345 0.370395621 2.73311 0.420314 0.3383579  
0.74123171 0.4083811 1.010448 0.103225583 0.1564607 0.872862659  
0.7539083 0.3563713 0.423380914 0.4752498 1.714501679 0.4073138  
2.616459 0.408975 0.2464312 0.1085934 0.594139777 0.4817665 0.2941878  
1.604961 1.195 0.08392876 0.09711429 1.543578 1.035498 1.017993402  
0.013987221 0.5749277 0.301453 0.4435562 0.2405039 1.330502406  
0.7746232 1.039649894 0.7907304 0.9933981 0.198283738 1.18328207  
0.1790196 0.5609062 0.406897131 0.2542271 0.3026018 0.08907072  
0.7367925 1.841333 1.597556 0.4759245 0.04277592 0.0897298 1.351794  
3.106968 0.1111599 0.2016505 1.201289009 1.565608 0.5044397 0.163803123  
0.1413792 0.3140093 0.5088892 0.5782558 0.5160595 0.67292896  
1.343183 0.4689495 0.4493325 0.03068475 0.704817 0.132358739 0.1556135  
0.2579681 0.2028213 0.89095527 0.229019518 1.270958 0.3586416  
0.5037173 0.846497503 1.68773 0.3792779 0.385270662 0.4825521  
1.378069 0.1838695 0.3301254 0.3890457 0.4331619 2.081886098 0.73422  
0.282510694 0.4856271 2.404276 0.9130829 0.4118336 0.3867407 0.81948  
0.2795299 0.394316376 1.218012 0.8215871 0.048062257 0.7844608  
0.1805125 1.188853 1.051655 0.2929013 1.017978 0.4364533 2.423573  
1.327715823 0.2800043 0.497490694 1.061243 0.6856441 0.2855391  
1.094401397 0.309226493 5.385943 0.2143691 2.325618 0.1151252 0.3348617

0.254785204 0.3918954 20.59391 0.4470858 0.437026953 0.1241047  
0.1121465 0.228578231 0.1268819 0.412715722 0.07299271 1.571084  
0.324824885 0.7970984 0.9936057 1.30853393 1.248741511 0.3661148  
0.2877817 0.4867461 0.7780715 3.979707 0.6185742 1.273978 0.4253764  
0.2579578 0.479030217 0.2198421 0.259210362 0.2684311 0.392523664  
0.798691 0.2345876 0.366145783 0.1231501 0.1792555 0.117271 0.150939455  
0.2294438 0.05881888 0.126752203 1.499723797 0.2344077 0.734149  
1.588097 0.410261455 2.378004321 1.299152929 0.4370431 0.4592948  
0.9946318 0.1557912 0.3014388 0.513024 0.4970135 0.3096707  
0.6447825 0.4288447 0.4223514 0.430557876 0.2817892 0.1549844  
1.243037 0.2790544 13.98386 0.8592583 0.3955234 0.2868579 1.345892  
0.5429894 1.135227984 4.94253 0.3472562 0.76108 0.3180365 0.788808787  
0.1639613 1.499171 0.9128184 0.4415467 1.122049 0.2089083 0.2662979  
1.235855538 0.5476921 0.2662385 0.143187895 0.1391907 0.8593301  
1.030775 0.6052974 0.8603074 0.279197618 0.154362264 0.3711283  
2.447571 0.2626658 0.265415562 1.120776267 0.275849243 0.7008352  
0.4610109 0.6109581 0.1144114 1.810232 0.1675222 0.2986403  
1.794514674 0.350846816 0.4042433 0.726654878 6.865122 0.255505369  
0.5496395 1.558565 0.742664 1.743212 1.990201 0.2691357 1.230873 0.03201658  
0.2308675 0.995421705 1.555187 0.9794153 0.3156015 0.6151211  
0.60109905 0.2134176 0.1930791 1.211159 0.269341744 0.7166591  
0.3607612 0.1720582 0.1280181 2.553982 0.4055911 0.1849202  
1.375869025 1.147630593 1.54916641 0.2620858 0.265338495 0.096629971  
1.089198 1.079409 1.633790157 1.888681 0.4323466 0.1380321 0.763053095  
0.5392308 0.1020723 0.15197 0.154595166 0.2207411 0.4501499  
0.2067287 0.4683143 0.4052756 0.4939538 0.5088545 0.2561351  
0.6809535 0.75064 0.7903399 0.23277388 0.1917672 0.1768735  
0.3489715 0.4893718 0.2187236 0.2788461 0.313418 0.112968936  
0.295101353 0.360328965 0.3933007 0.6165361 0.2034886 0.3245459  
0.827793 0.446909976 0.3835378 0.9217245 0.1212645 0.2904768  
0.1342383 0.146763799 0.174168 0.9721254 1.043479 0.7288075 0.2701876  
3.520616 0.7188726 1.069208511 0.4105523 0.3187098 0.107975433  
0.5241638 0.8979684 0.721724 1.940376 0.4489245 1.705850749 1.355908726  
0.275525552 0.02440376 0.7306001 0.3192154 0.3063601 1.483956  
0.3088771 0.445971042 0.6827702 0.088094208 0.2667633 0.7049069  
0.309198 0.8960922 0.03613638 1.050308678 0.2829618 0.4587556  
0.9435024 0.7378519 0.03034566 0.4164354 1.281453 0.965626269  
0.5912759 0.377211785 0.2112676 0.1033668 0.870685697 3.470607  
0.4442703 0.2099763 1.575425357 0.2469793 2.264663 2.982069 0.322101113  
0.6556092 0.2855638 0.05755475 0.1127527 1.075532 1.076998 0.2922743  
AC087741.1 0.2253066 0.745522454 0.2327752 1.277657083 1.752019066  
0.55451989 0.2955012 0.408956533 0.06856706 0.0295202 0.427109788  
2.130613 0.4537362 2.093172 4.520811 4.988693 0.7158367 0.619138585  
0.2735633 0.6192233 0.61119502 0.716706 5.768156143 1.735124 0.87605

0.763103824 0.4929968 0.3823124 0.6861087 1.448401 0.7078459  
0.703972372 0.7558543 2.830867509 0.7414463 2.588608857 2.503278254  
2.157591968 1.816936 2.177638 0.745248831 2.354141 0.12481601 0.9827874  
0.62467919 0.4834734 3.568115 0.8575676 0.241566759 0.05366073  
1.307109 3.290694 2.27322986 1.133126 0.387673026 2.452825 0.4939482  
2.476997 0.03844372 0.8845996 0.1249093 4.000933 2.51787062 0.3005509  
0.1608372 1.403513 0.1480292 1.511776 1.508142 0.110783 0.451817 1.228338276  
0.2148108 0.02989067 1.459049936 0.561681 0.901870835 1.976098 0.1264643  
1.416242 0.5312563 0.1669005 1.204128 0.154760689 4.261676342 0.1717399  
0.1863575 2.86534 1.096322052 0.2636048 0.6390631 0.2190965  
2.253594465 1.024902 0.6636276 0.810960876 0.2049709 2.942461933  
0.546586349 0.2840477 0.417662134 0.157594 0.6092881 0.417809077  
2.492506 0.1193757 0.318952514 1.219234 2.234627966 0.823109936 0.1409321  
3.444089665 0.4064613 2.66161 5.523332 0.7950108 1.439063 0.762491674  
1.715003 2.979004 0.1028025 0.1885024 0.3293167 1.738502 1.407757  
0.2307758 0.7622442 1.65781 6.436182 3.345343887 1.123598675 0.3705186  
3.446058777 0.669113709 0.3664833 1.815350383 0.8900274 0.1179246  
0.232642264 5.795264506 0.243698209 0.868181985 0.2050452 0.6822116  
1.675977 0.9804529 5.348779 0.664549 1.796926378 0.6630383 2.00907  
1.013773255 3.115713 0.6622814 0.475598827 1.164773 0.2346095 0.983295811  
1.399269 2.283791 0.641380102 1.217872 3.241944 0.5227306 2.034591716  
2.358696 2.490753 0.141034374 0.070498 0.944446493 1.100993 0.4298172  
0.773745711 0.4326784 4.00996322 1.513853 4.391181 0.1385437 0.4546642  
0.2209739 1.70231573 0.4039452 0.2317435 2.600961 2.195856 0.2456858  
0.1180047 1.295439 1.186837 2.016602649 0.042490077 4.204747 0.9539034  
1.110342 0.8211673 1.653451863 2.166521 2.835957857 1.990643 2.256822  
0.146711092 0.90519014 0.3036927 0.1549008 1.192565413 0.6793078  
0.6958852 1.577547 1.299689 1.669251 1.733334 1.164903 0.09922979 0.1486796  
2.370543 3.567904 0.1626999 0.124105 0.847970753 1.406868 1.22199 0.621996948  
0.3578988 0.2676461 1.838359 1.97545 0.2258742 3.796388015 2.761991  
0.4127999 1.585129 0.008473951 1.311526 0.196053827 0.3315175 1.762025  
0.3963888 2.992061324 0.165413686 2.147368 0.165964 1.630011 1.455351021  
1.018552 1.185373 0.360824554 1.858566 1.492576 0.07616655 2.878698 0.2022391  
0.5514809 1.98033894 0.3649741 0.124829794 0.3094883 2.940143  
2.262848 0.1030031 2.910381 0.3803916 1.328574 0.647856705 2.159097  
2.602725 0.079637715 1.097633 0.08997429 0.9544849 0.6655201 1.742771  
0.1059317 0.5588286 1.946517 2.781037756 0.2769366 0.376008863  
1.970674 1.339571 0.4030365 2.062286905 1.028824502 0.3045852 1.171762  
3.110881 0.0454188 0.2668159 0.370999128 0.141165 1.649034 0.1419881  
2.782971415 0.142804 0.03097057 0.952128519 0.0764507 0.266661431  
0.209641 2.342286 1.749231471 1.542354 0.6640629 3.29747294 1.832171883  
0.2497934 0.2314514 0.7489149 1.285109 0.8358915 3.724627 1.756934  
2.52996 0.1994665 1.841880754 0.05356937 0.222367204 0.8117275  
0.65363573 0.8418619 0.1993357 0.791833474 1.269682 0.1485105



0.4979311 0.389047771 0.1629349 0.2371554 0.183771516 1.078395029  
0.4654714 0.7874308 0.4375859 2.188076949 1.258809455 3.976603509  
0.0924469 0.3228645 0.08063975 0.1367928 0.2063049 0.5258879  
0.4803963 0.3016495 1.338179 0.1782824 0.2416058 0.333941957  
0.965488 0.5136091 1.292608 0.6322405 3.936551 1.006127 0.2952119  
0.2200532 0.716138 0.6739057 2.347107034 4.026337 0.2972864 0.9353756  
0.4077797 3.767328807 1.148678 7.470724 1.981035 0.1292839 2.112029  
0.2948726 0.4208823 0.248215208 0.1795344 0.08771389 0.535148685  
0.2346811 0.9725985 1.952987 0.460423 0.6119963 0.74411167 2.527287068  
0.8104705 0.962053 1.659436 0.073297601 1.540118944 3.105413863 1.107324  
1.593777 0.8157685 0.972456 1.060307 0.2015754 0.3803856 4.166379434  
1.887979382 0.313441 2.323807399 2.860603 0.812860253 0.9107362 2.258618  
0.6707172 5.297936 1.196988 0.2972998 1.346543 0.287357 0.460694 1.91153756  
2.995227 0.07039811 0.3578025 0.3877098 1.808059597 0.3759822  
0.8062142 0.9021037 1.889850271 1.206859 0.4770938 0.3348739  
0.1343441 2.265635 0.4903023 1.332205 1.855450263 4.23935192 3.305475207  
0.1047172 0.36987094 0.16678433 2.086893 0.2457548 1.297659407  
2.162512 0.4907109 0.4489592 2.126244384 0.2174157 0.277548 0.06456658  
0.195169175 0.272289 0.522757 0.2005131 1.241572 0.2933118 2.4554  
0.3351007 0.1851963 2.270316 2.235747 0.8584956 0.267022607 0.7000887  
0.7149231 0.447666 1.572605 0.3913068 0.2188608 0.1967137 0.074394488  
0.266713129 0.37401675 0.2613046 2.746047 0.2110767 1.293992 1.436944  
1.872177345 0.1412246 2.520873 0.2723739 0.3042773 0.4329949  
0.115801525 0.4979611 6.12433 0.4346152 1.188444 0.8744931 2.183176  
3.005042 0.614652817 0.3162672 0.855007 0.135840627 0.06799049 0.9373357  
2.113697 1.789491 1.53609 1.391001965 2.500004402 0.318625169 0.05728474  
2.696744 0.4735186 0.2655292 1.609974 0.2274667 0.679139987 0.3286738  
0.375981925 0.1289221 2.128121 0.2805626 0.6236151 0.04740254  
1.748276613 0.7524902 0.5979801 0.3832742 0.8120468 1.035806  
2.056533 1.028025 0.637861406 1.349434 0.355408412 0.233376 0.1888424  
2.049289804 3.292381 1.742926 0.4407043 1.143180584 0.2020925 4.778891  
1.521133 0.500145076 0.8477931 0.1944034 0.1827858 0.24599 0.8154231  
2.096703 0.6559691  
AC053513.1 0.1285244 0.288915206 0.1549156 1.274869396 0.213327667  
0.534013274 0.3728891 0.330036454 0.3028336 0.07683053 0.2362851  
0.3891385 0.7104679 1.445856 0.5972346 0.8225021 0.4777094  
0.451190951 0.5546568 0.5013919 0.293324624 0.6029348 0.578257219  
1.167278 0.5903028 0.562724444 0.8965651 0.2067579 0.1380248  
0.398117 0.4151593 0.382369723 0.8180071 0.221690207 0.9770732  
1.078287436 0.437467287 0.802872562 0.9972935 0.7133279 0.71616595  
1.23044 0.088848253 0.1266483 0.479302678 1.315352 0.7216022 0  
0.159672853 0.1432407 1.11768 0.8831498 0.973261287 0.3276802  
0.177680993 0.7451381 0.4339479 1.313985 0.0667035 0.2908164  
0.233401 0.3710645 0.411175939 0.8065623 0.2407643 1.103253 0.2437848

0.5560022 1.86224 0.3446686 0.6202645 2.429285878 0.2376747  
0.05186314 0.377256554 0.6543541 0.084814712 0.9255436 0.4388552  
0.108811 0.3040924 0.3066228 1.235763 0.477376844 0.867097252 0.3049149  
0.1124688 0.1009469 0.453939519 0.6166913 0.1670212 0.09160316  
1.196061223 1.095561 0.6060299 0.194828406 1.032065 0.254477286 0.310580309  
0.3833276 0.070700821 0.3281287 0.3191465 0 1.005265 0.5848324  
0.168125427 1.176246 1.280828782 0.484126716 0.2037754 1.003240231  
0.5976685 0.3582562 0.4228017 0.08154201 0.4072214 1.142586918  
0.4603282 0.7350566 0.07510404 0.08050941 0.2455585 0.7394627  
0.1418933 1.928543 1.464433 2.002657 0.2740463 0.613849531 0.823412538  
0.2717887 0.122025282 0.789012646 0.6065348 1.976926855 0.3001034  
0.1444308 0.146784143 0.677023227 0.217699548 0.381898671 0.4341635  
0.7707826 0.9903637 0.4330273 0.6553792 1.08246 0.61453033  
0.7330202 1.463229 0.883440308 0.8882474 0.8833101 0.382413962 1.9731  
0.2960507 0.149987824 0.6025356 0.1212266 0.34536889 1.419185  
0.9893357 0.2819649 1.05475775 0.6261843 0.7651129 0.10413107  
0.1420499 0.959910437 0.5143188 0.3903114 0.262537674 0.2602559  
2.109613177 0.2276998 2.083388 0.2299348 0.120594 0.1752735 0.284691977  
0.3560042 0.1294105 1.788473 1.027751 1.158217 0.01861357 2.049194  
1.353729 1.242634404 0.134044206 0.6079695 0.1444462 0.2742418  
0.05587463 1.2247333 0.5054279 1.073597646 1.142166 0.3592477  
0.258142979 1.722192174 0.269595 0.2199007 0.377364275 0.2370496  
0.0843617 0.660113 0.935573 1.089784 0.8935325 0.4224874 0.03279488  
0.1146547 0.5181879 0.8282763 0.1278339 0.3975395 1.218347672  
0.9783008 0.1017729 0.156977993 0.2032325 0.7430261 0.3426979  
0.3831242 0.3359255 0.299413332 0.749366 0.543037 0.444501 0 0.3216427  
0.115312537 0.08521693 0.09888778 0.0797417 0.780044172 0.202594189  
1.245956 0.6688181 0.3634666 0.85392292 0.6494612 0.3191485  
0.363866737 0.5672668 0.9534443 0.08810412 0.2492614 0.2412465  
0.2532896 1.059148843 0.6332647 0.061883295 0.5011921 1.80382  
0.7913385 0.1787202 0.1853133 0.3174758 0.1409909 0.287002426  
0.7333581 1.013605 0 0.541278 0.371298 1.104081 1.024918 0.07655374  
1.074532 0.228146 1.13594 0.889980734 0.07488488 0.602225577 1.017024 1.35338  
0.6080926 1.099278408 0.649130217 8.314818 0.7367398 1.091143 0  
0.483994 0.147981305 0.5551852 13.20158 0.3641886 0.328484311 0.2378674  
0.1671814 0.328581207 0.1326492 0.477608131 0.03730739 1.505622  
0.804167163 0.4047078 0.7826346 2.19452045 0.734178291 0.2889435  
0.2709524 0.6885912 0.688294 0.9376007 0.6563146 0.7583204  
0.3977096 0.1695151 0.329589167 0.09914446 0.126847624 0.2572464  
0.134746929 1.635996 0.184462 0.27675808 0.2247978 0.1603341 0.1404809  
0.137762201 0.226166 0.1578306 0.141716005 1.229333343 0.06418307  
0.435753 0.5472094 0.663469698 1.119153189 0.556434216 0.1782268  
0.1867335 1.679011 0.1684409 0.1758393 0.466649 0.05013733 0.1294987  
1.46053 0.3535279 0.4433014 0.386280647 0.5126335 0.4180753

1.226166 0.4366158 8.761216 1.251653 0.6556424 0.4072674 0.8693247  
0.5632184 1.23337158 0.6970235 0.06655744 0.9660508 0.4208935  
0.279507875 0 0.7696635 0.9543102 0.1223563 1.604921 0.08897947  
0.2983902 0.884021066 0.3243109 0.2148592 0.237851004 0.08424702  
1.944058 1.250412 0.1628285 1.312232 0.407717156 0.105664645 0.831708  
2.072176 0.882749 0.089772911 1.55288278 0.1866039 0.3082909 0.1745391  
0.6366619 0.1949231 0.867403 0.2522805 0.2569932 1.056413698  
0.461112958 0.1489999 0.974928628 12.34304 0.43095239 1.356199 0.5323811  
0.7117197 1.594258 1.343054 0.6220465 0.9573459 0.06136512 0.3711258  
0.606482099 0.8129389 1.208616 0.2971453 0.5825559 0.747312333  
0.5077866 0.4440819 1.572797 0.210319325 0.3650117 0.4285097  
0.06281492 0.2208313 1.938073 0.3080197 0 0.61576541 0.718689456  
1.250204471 0.1496306 0.096869609 0.254660237 0.6622824 1.674046  
1.010721288 0.6643396 0.4370977 0.1959715 0.816902187 0.1653641  
0.2708843 0.1792466 0.084659258 0.1128232 0.5530688 0.1352981  
0.1538747 0.5624946 0.4982867 0.3376054 0.2677776 0.4983341  
0.8099498 0.6564212 0.183035872 0.2868712 0.6471962 0.9277763  
0.7308799 0.1458157 0.2250337 0.09101785 0.033311353 0.246812041  
0.214333609 0.3059005 0.4241979 0.1902535 0.4276568 1.683742  
1.212386551 0.4165647 0.8284926 0.2634134 0.3071709 0.2469986  
0.048222391 0.2945488 0.4192291 0.7049183 0.6651814 0.8492897  
1.938712 0.8702142 0.947983056 0.4762767 0.8144806 0.229947681  
0.3044386 1.105298 0.9563586 1.391424 0.3357809 1.355375959 1.477763268  
0.165028325 0 1.09293 0.2796935 0.1084043 0.5332966 0.1127646  
1.269955634 0.4322123 0.030699497 0.1022593 0.3672816 0.5926294  
0.4809028 0.05194604 1.158217104 0.1205208 0.3751601 0.4433447  
0.5028324 0 0.5947133 0.5416535 0.483621867 0.6628611 0.374253261  
0.04049295 0 0.549950152 3.021327 0.1502679 0.4185528 1.062603614  
0.07012994 1.200049 1.978046 0.396042563 0.3390783 0.1782007 0  
0.1944984 0.9474922 1.471542 0.462381  
ZNF32-AS2 0.1222757 1.285099479 0.4692218 1.201335492 0.646145427  
0.780845624 0.7601994 0.645923278 0.4939032 0.2297275 0.315299976  
0.9043922 0.6576576 2.170952 0.9566595 0.9102702 0.7401593  
0.315370723 0.6610622 0.5256898 0.40479546 1.369666 2.502848628  
2.205189 1.10716 0.674830419 1.23843 0.5901168 0.3189059 1.602971  
0.4513998 0.450393508 1.580642 0.971701245 1.080071 1.339257742 1.919607837  
1.629182443 1.319293 1.308819 1.249135859 2.335752 0.271698938 0.5311433  
0.799479755 1.1383 1.444364 0.6600826 0.651041799 0.2569786 1.367151  
3.148702 1.294927114 0.4008199 0.579573801 1.121792 0.5838876 1.053656  
0.4351574 0.7378059 0.4894236 0.7564796 0.89413729 0.6123666  
0.5890079 1.689622 0.5679975 1.009187 2.164442 0.3459283 0.6463087  
2.091748439 0.2819149 0.2326105 0.971498703 0.9763852 0.16599317  
2.4701 0.7320131 0.1478868 0.4649589 0.4723008 1.315169 1.012144408  
1.545125785 0.2712533 0.1375724 1.448817 1.040012341 0.6369978

0.4691358 0.2838585 1.631838225 0.9322402 0.8566116 0.776730262  
0.7733782 0.259398117 0.452265723 0.267936 0.172963114 0.3344737  
1.041017 0.18189699 2.032329 0.7551123 0.297052551 1.159621 2.724722483  
0.915914251 0.1495554 1.778504181 0.701828 1.405958 1.982496 0.4211352  
0.7864975 1.618293794 1.152964 1.65796 0.2909141 0.2297854 0.3696839  
0.9559904 0.9091472 0.4531418 1.164346 1.093873 1.162077 1.118933784  
1.777415041 0.5626131 1.094587009 1.102998578 0.4627004 1.395569838  
1.631501 0.1766684 0.259345685 2.13308222 0.245807123 0.830471364  
0.5114014 1.257099 1.900262 0.78191 1.6415 2.130026 1.105435612 1.361555  
1.614355 1.492295932 1.223883 0.8270255 0.393911957 2.311966 0.7587496  
0.611552564 1.098311 0.667282 0.751034228 1.480666 1.336938 0.5671702  
1.685138731 1.258349 1.403834 0.305696605 0.3346412 0.357841277 0.9586545  
0.3410219 0.83690312 0.4081361 2.712820889 1.140619 2.315369 0.6988818  
0.1802913 0.4466569 1.083402395 0.526188 0.09045457 3.130797 1.652253  
0.3935378 0.1821456 1.900826 2.469798 1.52888476 0.087447181 1.92115  
0.6674852 1.543087 0.4556407 1.313402026 0.4636812 1.81729723  
1.397103 1.669847 0.678302767 1.68131842 0.2598186 0.3785694 0.882156752  
0.7517485 0.4471636 0.7424857 1.468283 0.7929809 1.048543 1.064897  
0.240689 0.1736381 1.817036 2.166048 0.2432375 0.5583124 1.347153227  
1.365422 1.023577 0.298691828 0.3867032 0.4241406 1.375802 0.6471685  
0.5783115 1.014213353 0.8673468 0.6871502 1.064776 0.02397988  
1.232762 0.206874515 0.1158197 0.4569599 0.5527289 1.340972456  
0.110139603 1.224457 0.4242007 0.9077126 1.134052772 1.568478 1.098858  
0.593444534 0.5832641 0.945614 0.3412696 3.252241 0.4292273 0.8720998  
2.49068043 0.7650491 0.302783679 0.8407685 3.378612 1.067248 0.315772  
0.967151 0.6949204 0.5058848 0.873755893 1.674488 0.915125 0.200321364  
1.471319 0.1513911 0.996126 0.8580769 0.8115542 0.1844733 0.6408256  
1.852649 1.610262793 0.2646208 0.720275099 1.058139 1.679452 0.8132449  
1.591617307 1.288842354 0.8619256 1.640616 2.12036 0 0.5834436  
0.434427328 0.4127893 2.387507 0.4367423 0.776820025 0.5172631  
0.2337109 0.342377987 0.2343714 0.925002929 0.2129613 1.921757  
1.184623793 1.188097 1.006961 0 1.484776216 0.4712493 0.4576892  
1.521552 1.543528 0.6849406 1.398438 1.187303 1.183768 0.5298986 1.036684094  
0.1212739 0.293081085 0.2727096 0.329646079 1.505632 0.2444376  
0.499737282 0.5682788 0.2241387 0.1145579 0.29208631 0.2254163  
0.3677317 0.26414879 1.474241155 0.3140361 0.1924776 0.8589978  
1.422733178 1.13343431 1.973835096 0.697625 0.1957828 0.4849189  
0.2372555 0.3687213 0.4620819 0.5110684 0.2992063 1.465868  
0.2738767 0.5186722 0.601363885 0.8360742 0.3947584 1.227726  
0.3916516 4.653329 0.9132444 0.5457952 0.7306513 1.171239 0.7388538  
1.802807911 3.384572 0.3256534 1.528303 0.4497442 1.181092746 0.1888296  
4.853727 1.340252 0.232815 2.128924 0.2539602 0.3457821 1.090580685  
0.3479812 0.2482158 0.387920533 0.1832024 2.466054 1.651871 0.5145292  
0.7040033 0.235507341 1.05122895 1.142286 1.924491 0.9898006 0.04880472

1.371856113 0.938380495 0.5028037 0.4625768 1.205236 0.5762079  
1.574404 0.5984787 0.4000884 1.522603919 1.37875322 0.1701069  
1.181179511 5.080167 0.73480521 1.856397 0.7235676 0.7843051 2.876748  
1.885585 0.4577712 1.282556 0.07506208 0.512163 0.844886526 3.535611 0.65007  
0.5711662 1.085844 1.117252581 0.5751174 0.3621353 1.479886 0.639260887  
0.3759865 0.8259412 0.4097892 0.2601173 1.417508 0.4784394  
0.5026561 1.746566889 0.799185563 2.523271797 0.2963323 0.335725448  
0.264304326 1.432363 0.8499888 0.883084819 1.072441 0.6534731 0.4954074  
1.095938853 0.2696988 0.2208979 0.3471542 0.184098805 0.4600195  
0.7757386 0.2521862 0.4810072 0.5679109 1.408637 0.3670759  
0.5095171 1.722262 0.8343025 1.496071 0.391808002 0.1462092 0.4272414  
1.126063 0.9337495 0.3864519 0.1835081 0.2375113 0.162986377  
0.301901579 0.427246221 0.3029067 1.680185 0.232719 1.141335 1.689896  
2.21374853 0.6594095 3.258827 0.1768987 0.3444217 0.6378294  
0.235943367 0.8807171 2.260131 0.6283129 1.048708 1.064193 2.486559  
1.797738 1.27326109 0.3208433 0.877672 0.450036831 0.2358474 1.364881  
1.10019 1.330779 0.958367 1.628815866 1.516727344 0.484472105 0.07628533  
1.462209 0.5274386 0.3830686 0.9733189 0.3678246 0.876285579  
0.5482649 0.275379572 0.250168 1.690075 0.3451938 1.414583 0.1694417  
1.596639301 0.5241655 0.3250524 1.065574 0.8200891 0.2086909 1.65911  
1.157564 1.076957865 1.028776 0.582639583 0.1981246 0.2734102 0.896935275  
3.064222 0.8373491 0.3938274 1.039825149 0.2573497 1.853101 2.044429  
0.854895907 0.4391598 0.3736728 0.1499285 0.3700843 0.9188283  
2.499996 0.6090931  
AL160006.1 0.6674365 1.724109092 1.444979 2.801930697 1.248305148 1.8115325  
2.476305 2.295475555 0.91632 0.8293543 0.774580627 1.362354 2.141105  
2.800097 3.240876 1.803139 1.413209 1.835340585 1.897014 1.604889 1.267844415  
2.076919 2.63956991 1.678904 1.622297 1.871565976 2.533483 0.8082979  
3.092593 1.48961 0.7670994 1.275442461 1.74007 1.523147383 2.500899  
2.340518024 1.630007381 1.820493429 1.606078 2.520737 1.629719195 1.606563  
0.843731752 1.653209 1.498771701 3.439637 1.779888 0.7251312 1.872671701  
1.359006 2.755361 4.174014 2.636203535 1.548709 1.848383239 2.107019 1.633171  
2.706447 1.170547 1.747795 0.9163472 2.049656 2.093281489 2.000956 1.827568  
1.535552 0.9510185 1.108269 3.698192 1.243795 1.906107 3.433617086 2.170991  
0.7898304 1.90814466 1.92286 0.198944415 2.054632 2.507141 0.8444208  
1.942917 1.395512 2.841453 1.33283932 2.996311867 1.072344 0.7415581  
1.625686 1.960036766 1.975489 0.5002713 1.334104 2.786197646 1.331309 1.70088  
1.682474523 1.17185 1.904324272 2.077568846 1.313253 1.303605086 1.2062  
2.42085 1.046425428 2.987808 1.446024 2.163099514 2.071281 2.602736864  
1.942358641 1.401845 1.450729572 1.58186 2.002859 2.923409 0.9373077  
2.070961 1.400048391 2.261975 2.759556 1.866841 1.620691 1.13082 0.8682022  
1.298675 0.7667221 1.19521 2.341476 2.782324 2.338678327 3.756021247  
2.060403 1.719497155 1.870466872 2.198796 2.303596535 1.484038 1.972015  
0.719437271 2.564151018 0.595067146 1.418713706 1.093544 1.052403 1.770998

1.201977 2.048615 3.28298 2.208389063 1.169077 2.602778 1.684514594 1.940887  
2.588473 1.603050837 2.860334 2.21728 1.347755864 1.433183 0.7745447  
0.990805675 2.856883 2.454218 0.9180447 1.929222709 1.973015 2.021522  
1.002533241 0.729387 3.014935829 1.693425 1.039486 1.190692364 0.8725941  
2.352991591 2.317473 3.024036 1.624616 1.157513 1.284774 0.980080491 1.234668  
1.268567 3.836123 2.765399 1.86974 0.7135585 3.125227 3.486224 2.304948445  
1.121583736 1.955532 1.55081 3.216356 0.7922376 2.563826721 1.089334  
2.747771963 2.237714 1.584712 1.408336495 3.422268376 2.170828 0.5217948  
2.091793906 1.327838 0.6792958 2.279146 1.603707 1.370565 2.254601 0.904272  
1.383499 0.9576267 2.040918 2.534784 1.2643 2.118576 2.407405314 2.176839  
1.591481 0.737342314 1.126552 1.422909 2.450295 1.125733 1.636681 1.451396401  
1.916842 1.471748 2.023028 0.1183921 1.159836 0.900258327 0.6414312  
2.181067 0.9526731 1.745558357 0.650165886 1.853862 1.62604 1.017982  
2.750377161 1.556631 1.530111 1.918311609 3.026448 1.867453 1.457417 1.09417  
1.009671 1.3991 2.918992432 1.654559 1.13199753 2.276029 2.79245 1.907338  
1.121029 2.225289 1.246013 1.663439 0.47559624 1.946982 2.230537 0.756095154  
1.551081 1.075368 2.039579 2.179224 1.393656 0.9553199 0.7632285 1.913867  
2.307622305 0.9612831 2.396503546 1.982858 2.67463 3.35089 1.555115189  
2.010731857 2.109223 2.113032 2.734983 0.3310746 1.676021 0.79783545 1.95225  
1.863631 1.983759 1.362757991 2.338672 1.258381 1.223840297 1.331275 1.839289756  
1.39101 2.070246 1.525737001 1.887968 2.432479 0.49390095 2.667992765  
1.466786 1.78877 1.605852 2.409682 1.148872 2.35702 2.158386 1.688238 1.271001  
2.245934852 1.067332 0.614320396 1.152776 1.517437077 3.420158 1.90105  
1.87554427 1.48744 1.1467 1.377086 1.311851667 0.8269864 1.606362  
1.502596858 1.500012401 0.9699621 0.9661809 1.8942 1.527008452  
1.668351396 2.123371972 1.054497 1.517621 0.4224908 0.6165077 1.512628  
1.753325 1.856211 0.9634075 1.435641 1.246966 2.112036 2.13302281 2.095958  
0.7318302 2.893527 1.230498 3.369947 1.279997 1.499164 2.345478 1.581277  
0.8787364 1.649790696 1.907827 1.683528 2.800374 1.12801 1.663522678  
0.6195892 3.17059 2.954302 1.552817 2.858069 1.269414 1.36904 1.658555653  
1.293754 1.877393 2.084963157 1.056884 1.900022 2.127528 0.7410707 1.922249  
1.112180065 0.865628032 1.226007 2.76581 1.303787 1.843836783 2.437392435  
1.382798632 0.882722 1.577279 2.515496 2.042983 2.071836 1.545637 1.860784  
2.042748675 1.304919047 2.232624 2.428230339 2.313492 1.165846274 1.564291  
1.910435 2.154979 2.648203 1.871091 1.266815 2.286283 1.509224 1.184355 1.375697327  
2.012569 0.5761776 1.062582 1.165428 1.86411531 1.641936 1.300772 2.739905  
1.998097078 1.348507 1.172876 2.457514 2.126077 2.025036 1.155387 1.240843  
1.982364811 3.206114947 1.59209803 0.9915713 2.009378073 1.049600374  
2.222848 1.00628 1.585998831 0.8804886 1.989334 1.444212 1.420740762  
1.516076 2.144329 2.106159 1.25470803 0.8887236 1.649698 1.086061 1.360236  
1.969265 1.07576 1.854988 0.9780994 3.181895 1.007382 2.486659 1.662072947  
1.622607 1.046584 3.093246 1.637615 0.8455045 1.221139 1.328766 0.766785311  
1.112498249 1.313149221 1.594939 2.312505 1.581911 1.660536 2.910506 1.974616707  
2.655094 2.704299 1.415843 1.095553 1.581734 1.423750081 2.093336 2.60109

1.483599 2.518949 1.294482 3.21245 1.680694 1.703345881 1.279564 2.708882  
1.573843523 1.305634 1.332245 2.128475 2.125934 0.7567615 2.526558585  
2.185388802 1.051515396 0.1760344 2.092504 1.995105 1.09744 2.982825  
0.9178711 2.193099471 1.92927 1.284354507 0.6802084 2.4339 1.032443  
1.250686 1.873162 2.452224096 1.765103 1.440654 1.323393 2.108801 0.7452637  
1.731398 2.161129 1.836400679 3.293816 1.110727448 0.5457904 0.2187529  
2.064769007 2.866594 1.039008 1.448424 1.385745002 1.09257 2.672749 2.725726  
1.594503433 0.869373 1.617609 0.6436685 0.6355338 1.770626 1.810283  
1.291905  
AC124312.2 0.5183114 0.453948099 0.8414886 0.979290777 0.474045623  
2.482430762 0.6444782 1.026745726 0.3738561 0.1327891 0.222752911  
0.4707938 3.119601 4.363205 1.658929 0.7107805 0.1651286 0.854077753  
1.437951 1.485556 1.364902725 1.265376 1.076302214 2.858055 0.7141697  
0.457683582 2.087172 0.1786737 0.8746956 0.5590653 4.424801 1.06472506  
0.8298346 0.718416448 1.688712 2.953159474 0.720086669 1.16174055  
1.685356 1.040235 1.134628256 2.196341 0.614238974 1.876209 0.640124696  
2.041395 0.8503445 0 1.586819091 1.386382 2.285877 1.171408 1.106660344  
0.0566342 0.614185351 0.4953269 0.5625062 1.021954 1.469898 0.2233906  
0.979675 0.3919206 0.177662671 1.345942 0.07565853 1.3022 1.504794  
1.239947 2.663652 2.336991 3.811649 2.399214424 0.8962518 1.79274 0.514757802  
2.141576 0.11727074 1.708719 2.896052 0.1880621 0.9854516 0.3532984  
1.954813 1.856403396 0.666060653 0.5269958 0.1295894 0.4187288  
1.195520875 1.847474 0.2565946 0.9182627 0.954090992 0.3567462  
1.571136 0.112243063 4.194237 0 0.72849734 1.041102 0.244389724 0.378078  
0.1378982 0 2.425173 1.810994 0.193718291 1.941922 2.454324087 0.301224323  
1.267894 1.168523063 0.4131891 0.1934961 0 0.6107058 0.4815583  
1.143291088 0.3978012 0.9190313 0.2596102 2.678588 0.6855819  
2.961314 0.1401368 5.366974 0.03163792 1.959207 0.8525599 0.624081766  
2.678841508 0.9033511 0.05272521 1.714340491 1.859881 2.090875346  
0.3457865 1.372938 0.084564167 0.744624652 0.173657647 1.063413395  
1.834264 1.065738 3.758989 0.1603751 0.6472665 1.301465 0.718490001  
1.689208 1.376048 0.218126111 0.5823139 2.629244 0.591367628 2.019623  
1.535026 0.086409847 0.6738371 0.6809413 0.331618841 3.318534 0.5373989  
1.202082 1.190515653 0.3478685 0.3719175 0.215968328 0.272789 2.844083919  
0.2963054 0.9636997 0.5362543 0.726616 1.823061504 0.5059825 1.7526  
0.6141713 0.6252812 0.07573292 0.328029163 0.7306632 0.5431864  
2.060724 1.42104 1.501342 0.9007748 2.346375 1.506926 1.770903362 0.648686059  
0.2626941 0.4993036 0.5213805 0.1448553 2.261735193 0.2729843  
1.068340514 1.252761 0.1862704 0.347011874 2.808837096 0.04235919  
0.5067501 0.826136122 0.5007465 0.3280623 0.4327544 2.593279  
2.984645 1.355993 0.2987184 1.133612 0.7643394 1.567306 1.431541 0.2945867  
1.83222 1.855884978 1.950962 0.4690611 0.316529396 0.03902826 2.799555  
0.3644908 0.804061 3.161004 0.557293919 1.044482 1.294553 0.3841238 0  
0.3335442 0.239158743 0.1963781 0.05697048 0.5512822 0.9473693

1.050453242 1.711702 2.08712 0.1963103 2.108381113 1.338351 0.4903077  
1.479728071 1.918229 1.558799 1.027847 0.7953373 1.857346 0.3404876  
2.298850809 1.216106 0.427820812 1.336467 1.266529 1.3677 1.106852 0.5765109  
1.617237 0.2924159 0 1.013992 0.1251323 0.212284349 2.252156 1.020931  
1.258616 2.38549 0 1.954899 1.489628 1.016702 0.81716176 0.4745632  
1.700053186 1.515311 2.101797 1.807701 1.395862388 0.29267372 13.27473  
0.6366674 2.808732 0 1.163833 0.81843712 2.455312 8.280284 0.8145704  
0.1703195 1.027788 2.559234 0.410149376 1.375576 1.341385365 0.257919  
1.395395 0.851857064 0.4196829 2.645195 0 1.674958136 1.28415 1.404891  
0.8829907 1.635706 1.181607 1.097742 1.100932 0.4124258 0.1464896  
0.610329889 0.5997427 1.059638115 0.5779912 1.436143503 2.302435  
0.557922 0.204999127 0.03885263 0.7521595 0.04855968 0.095239817  
0.7817822 0.7014461 0.139961742 1.687263823 0.44372 0.9727905  
4.657879 0.297292433 1.80948225 0.625108883 1.663395 0.8298989 0.3627372  
0.6351768 0.8248976 1.728272 0.5199253 0.1119087 1.553408 1.099828  
1.199229 1.153167391 1.107505 0.1140908 2.897172 1.54697 12.0541 2.618705  
1.25121 1.055843 1.600474 0.7618158 1.407714547 0.383311 0.1150337  
1.569482 1.404723 0.5709173 0.1143465 0.7094603 2.107528 0.352455  
1.257476 1.422525 1.438584 1.136120751 1.268542 1.454451 1.296504357 0.7765721  
1.399995 1.383126 2.356915 1.6413 2.26082505 0.036524828 0.7565641 3.084  
2.145499 0.827508609 1.789270088 0.215009646 0.6089493 1.319773 1.96494  
0.1263348 2.611449 1.070245 0.6056875 2.080607382 0.132826449 0.4120355  
1.01100327 10.66647 0.203135744 0.2511395 0.6134227 2.626412 1.055265  
1.196521 2.858209 1.26066 0.3712087 1.23352 1.615983625 1.070501 1.244449  
0.293467 0.4794538 1.237790743 2.827908 0.4093458 1.934192 0.363502721  
0.49805 0.7742734 0.2714134 0.8057498 1.795685 1.597086 0.1598023  
0.370174013 0.451686454 0.810290603 0.8127809 0.669693412 0.800252308  
1.990691 1.091817 0.842239561 3.116551 1.196133 0.3725754 1.001981106  
0.7859637 1.300498 0.6970469 0.048773249 0.341244 0.6500048 0.9353627  
0.1329737 0.7870032 1.148277 0.9724934 0.5862259 0.5331792  
1.694575 1.454509 2.214433987 0.898656 0.1065308 1.789965 0.842138 0.4410327  
0.8102793 0.346081 1.036318532 1.030888231 1.234802524 1.283984 0.5236836  
0.9864668 0.4703588 2.462371 1.321021127 4.023329 1.55826 0.1606825  
1.327237 0 1.305731345 1.018159 0.5635538 1.728338 1.341267 1.288852  
2.212144 0.802146 1.204731188 2.111602 0.9552231 0.596140709 3.235961  
2.401554 1.711943 2.701745 0.435257 1.68498976 1.76142985 0.39931444  
0.3233641 1.682348 2.80979 1.436421 1.40452 0.292343 1.139665644 0.8300096  
0.159177249 0.2651077 0.816154 2.682595 0.8608466 0.08978028 2.192436392  
0.4860346 0.7294536 1.209867 0.869064 0.08041954 0.5950798 1.710913  
0.610821997 0.886953 1.117261919 1.53968 0 1.606016101 1.930776 0.432856  
0.3895232 1.377403045 0.2727184 1.721053 3.696999 0.201322091 1.93049  
0.8359751 0.09532926 0.7470198 0.9736998 1.095041 1.106516  
NNT-AS1 13.19457 3.844312595 2.241379 2.036768546 2.07476209 3.029804713  
1.876786 3.464720685 2.566801 2.223228 2.828409033 0.7768813 3.516895



4.205978 6.035797 2.481971 2.523569 1.855505645 4.012495 1.446046 3.208890456  
2.248498 2.319856557 3.587199 1.483042 2.312945366 3.673409 3.17697 5.647835  
2.107017 6.826721 3.223585964 1.82096 1.665910935 2.768889 3.073701575  
2.675236882 2.39571225 2.590053 3.987773 2.22898489 2.651483 3.141481123  
7.404671 3.354966437 3.862806 3.737656 2.157513 2.200518806 5.137778 2.513403  
2.361132 1.996462353 3.480412 2.522360296 3.156497 5.382985 2.905723 3.005626  
4.686033 3.743425 3.426539 2.951468378 3.169305 2.557983 2.788647 5.527077  
3.099901 4.539818 3.907367 7.528767 2.106941945 2.772342 4.502257 1.966411313  
3.6758 3.881162483 0.9035942 4.396343 8.188904 4.890007 2.789429 3.43213  
4.451988882 2.70504473 3.245764 1.419107 7.239294 2.589288363 2.787426  
2.145943 2.683577 3.059604028 5.63627 2.045931 1.218832293 6.031741 2.069271608  
2.271679863 3.488597 2.405332196 2.290941 0.3489998 2.10649431 2.557983  
2.842392 3.827894037 4.737501 2.751310612 2.630229544 2.159803 1.037154444  
2.163836 2.322982 5.603536 3.664335 2.088946 3.972660106 3.473929 3.538012  
3.135657 4.69097 2.254154 4.100309 1.445944 8.758385 0.8048149 3.182739  
4.315404 3.434308682 3.04038418 3.280472 1.991330213 2.702863372 2.960305  
3.981180736 1.52868 4.894821 1.720386005 1.984628393 3.125345005 1.92510593  
7.06888 3.692627 3.528337 1.727615 2.23931 3.027248 1.759602616 3.083029  
2.753718 1.312875539 1.597421 3.12622 1.322842755 2.780204 2.535398 1.233638455  
4.682842 5.326443 2.806200965 4.506 2.767708 2.983258 3.814557801 2.887021  
3.164376 2.887082984 3.016466 3.783539298 0.8542873 2.564056 3.482625001  
2.656271 3.667456707 3.447679 2.60551 2.581249 2.628472 1.725019 1.49541167  
1.993941 3.04181 2.647811 2.509604 9.107668 1.697269 3.803746 4.086587 3.137080349  
3.54204277 2.267274 3.966498 0.8489324 2.447182 3.706938327 0.8255162  
2.238580137 2.409324 2.10327 2.136074305 3.558454974 1.401909 0.8878909  
2.009000228 1.890633 2.684798 3.400596 3.627085 2.376865 2.938065 3.312667  
3.159582 0.3361829 1.981856 1.857957 2.843624 3.462944 2.665784373 2.903474  
1.362148 0.900858054 1.793141 11.80376 3.08969 3.643282 2.892737 1.446592725  
6.135463 2.415237 3.134593 8.845622 4.025949 2.863417096 2.290678 1.715417  
3.382945 1.946022134 3.044824397 2.931041 3.331842 2.282879 2.131663024  
2.972526 2.356509 2.045330513 4.495141 4.552025 3.537608 2.445133 4.051281  
2.326338 2.652102115 2.693717 2.69299547 3.692373 2.244409 2.788955 3.121995  
2.456713 2.544997 2.239159 2.991489963 3.054292 3.333378 2.688596339 1.899957  
2.589504 3.88357 2.999501 1.064679 5.480371 3.371984 1.958849 2.464269412 2.85564  
2.406833873 4.287363 3.517624 3.508336 2.566505845 2.402571019 14.34425 1.81471  
1.976314 6.095181 3.1225 2.994152075 4.922874 6.018181 2.330664 2.520003835  
3.085842 3.099229 2.139523072 3.020169 3.204012007 0.9477494 3.976956  
3.241158731 4.691185 2.925959 7.41915623 2.387976259 2.412032 2.116411  
3.335883 3.007494 2.440576 2.013616 3.908978 2.497955 2.335367 1.600103168  
3.941987 3.338598621 6.330186 5.57919866 4.38017 3.581766 1.982167087  
0.2269159 3.239466 1.597665 1.783061608 2.384436 1.914343 2.724787099  
4.61085725 2.142798 1.203503 6.267813 2.411547659 4.269774065 1.959629387  
2.874501 5.250876 3.173887 2.167428 3.037156 3.224422 2.569851 3.439843 3.05359  
2.833064 2.689194 3.422634392 1.997985 1.870685 4.308517 2.338316 6.225548

4.750855 2.060528 3.556057 4.995906 3.045868 4.168247052 2.267127 2.00434  
2.717427 3.078196 1.886643405 2.827156 2.49764 4.114846 1.809181 2.24406  
3.704988 3.073667 3.660926146 3.277496 2.83957 2.175193869 3.373287 2.404516  
2.552437 2.442614 4.562497 3.202918782 1.467171264 1.941754 5.455209 5.82442  
3.148164069 2.44125917 1.370858041 1.104004 4.049778 3.646845 3.872342  
2.968799 4.4758 3.576778 2.375217051 3.353020015 3.984032 3.424094965  
4.943252 3.431769502 5.321085 3.940914 4.429214 2.126684 3.619883 9.784469  
1.687307 2.209312 5.853079 2.315577226 2.440088 7.596908 2.061527 2.345957  
5.699562629 3.333295 4.346523 2.893669 2.240955603 2.581312 3.825204 2.740582  
2.661185 4.017992 2.84107 2.277975 4.356977665 3.045960415 2.786882467  
2.344723 2.262575224 2.619932411 2.402806 7.850399 1.427128145 5.533585 2.79437  
1.927627 1.740821043 3.82762 4.891479 3.553374 1.80092628 3.732939 1.967627  
2.716283 2.246454 4.473261 3.766775 2.267703 1.914129 1.671443 6.146205 1.887767  
2.119613808 13.62608 4.434797 3.588777 2.369051 1.267466 2.555483 2.111094  
3.158903453 3.552517991 3.341454446 2.7962 2.94299 3.207171 2.755816  
3.693377 1.776594113 3.377659 3.293269 3.116016 3.871508 0.4178517 3.540784022  
7.137982 1.562106 3.695701 1.696031 8.596154 2.852081 3.087462 2.739404926  
4.129465 2.039075 2.236035013 3.508423 1.965779 3.215984 4.013232 4.015554  
3.034992712 3.020524268 2.084142219 9.86785 2.805954 2.06257 2.443842  
3.691348 2.887837 2.276232906 1.799002 2.389577895 3.604196 3.260178 8.764302  
5.863736 4.062781 1.939271847 2.063653 3.021671 5.898917 2.993725 0.3835756  
2.485523 3.117144 2.031992057 2.024108 4.006753969 4.686942 4.956929 1.899359859  
3.590842 3.306145 3.152474 3.946829571 5.328969 5.020114 3.405197 1.661806776  
2.514478 3.0551 3.258097 1.490662 3.144985 2.817232 3.604253  
LINC01802 66.04506 0.148249207 0 0 0 0 0 0 0 0 0 0.05491094  
0 0.03238465 0 0 0 0 0 0 0.031839031 0 0 0 0  
0.046709104 0 0 0 0 9.308142 0 0.02509308 0 0 0 0 0  
0.06254537 0.03145531 0.028071514 0 0 38.47418 0 0 0 0 0 0  
0 0 0 0.09247725 0.179088463 0 0 0.03090251 0 0 0 0 0  
0 0 0 0 0 0.03741218 0 0 0.06097825 0 0.028018047 0  
0.047872472 0 0 43.04297 0.2145508 0 0 0.134724325 0 0 0  
0.02848904 0 0 0 0 0 0.02240486 0 0 0 0 0 0.03863641  
0 0.03858492 0 0 0 0 0 0 0 0.05750909 0 0 0  
0.0497176 0 0 0.042428758 0 0 0 0 0 0.02860345  
130.8553 0 0 0 0.022782531 0.02950141 0 0 0 0 0  
0.6793494 0 0 0 0 6.807152 0.03107553 0 0.174583 0 0  
0.025504633 0 0.03036393 0 0 0 0 0.02703128 0.02983958 0 0  
0 0 0 0 0 0 0 0.146938298 0 0 0 0 0.033678568 0  
0 0.04590069 0 0 0.02836149 0 0.100431491 0 0.02608712 0 0  
174.9206 0.02626542 0 0 0 70.665849988 0 0 0 0 0 0 0  
0 0 0 0 0.3102997 0 0.07433296 0 0.03211996 0.02490901 0  
0 0 0.04627652 0 0.03656048 0.08060499 0.03006418 0 0.0582779  
0 0 0 0 13.52535 0.03719827 0 0 0 0 0 82.4087 0 0  
0.04008291 0 0 0 0.095292869 0.04508092 0.8651156 0.03205525 0

0.140992 0 0 0 0 0 0 0 0 0 0 0 0 0.1717923 0  
0 0 0 0.026999081 0 0 0 0 0 0.03314804 0 0.03600807 0  
0 0.02862345 0 0 0 0 0 0 0.031656747 0 92.07387 0 0  
0.1779236 0 0 0 0.07511539 0 0.231760441 0 0 0 0.03119666  
0 0.02632204 0 0 0 0 0 0.331517295 0 0 0.031344 0 0 0  
0 0 0 0 0 0 95.64993 0 0 0.09760968 0 0 0.09696249 0  
0.038878969 0 0.06363235 0 0 111.2478 0.02562028 0 0 0  
0.039258934 0 0 0 0 0 0 0 0 0.02494298 0 0.297314567  
0 0.06209914 0.02190165 0 0.4066731 0 0 0.02873455 0 0 0  
0 0 0 0 0.071711042 0 0.03620214 0 0 0 0 0 0 0  
0 0 0 0 0.02872071 0.0730925 0 0 0 0 30.07048 0  
0.036520953 0 0.0310733 0 0.03208526 0.1031453 0.11845 0  
0.06593463 0 0.054222652 0.04205046 0 0.246469 0 0 0.08347084 0  
0.09572939 0.01953784 9.377083 0 0.08659169 0 0.071316729 0 0 0  
0 0 0 0 0 0 0 0 0.03462365 0 0 0.04348984 0 0  
0.044103771 0 0 0 0 0.1782815 0.025468189 0 0 0 0 0  
0.1698854 0 0 0 0 0 0 0 0.09375031 0 0.02519055 0 0  
0 0 30.96728 0.04348819 0.09133784 0 0 0.1058476 0 0 0 0  
0.03083237 0 0 0 0.0228453 0 0 0 0 0.08713429 0 0  
0.03286499 0 0.03128769 196.8338 0.02656016 0 0 0 0 0  
0.04456212 0.02409836 0.02423981 0.02961357 0 0.035952703 0  
13.16742 0 0.02466704 0 0.7166947 0.02652018 0 0 0 0 0  
115.9206 0 0 0 0 0 0 0.03282901 0 0 0 0 0  
0.05713919 0.2580597 2.060491021 0.07165318 0 0 0 0.02473991 0  
0 0 0 0 29.8352 0.03049497 0.1084051 0 0  
AC245884.8 0.4670692 1.585929585 0.2041566 0.68900896 1.635696816  
0.540500113 0.9186102 0.239876495 0 0.2362539 0.522414639 1.990709  
0.225447 1.751457 0.8943975 3.908754 1.281998 0.504513518 0.4830459  
0.7208323 0.567675452 0.6681711 3.954187565 2.039421 2.599009 1.193682989  
0.5831 0.2600921 0.1157526 1.669377 0.8897619 0.320669154 1.655373  
3.927506525 0.6555273 2.448541932 2.463310117 2.48971121 0.5389918  
2.692002 1.11778856 1.556296 0.167650595 1.623525 1.900177641 0.8104421  
5.859067 2.395888 0.06695373 0.2642791 1.827787 6.097375 1.460590443  
1.951112 0.447029224 2.691876 0.327532 2.589595 0.11188 1.056853 0.4474024  
3.993582 3.017237072 0.4431668 0.1468463 1.782756 0.1898435 2.196045  
1.992568 0.2890516 0.3467842 1.20212615 0.1630822 0.02174716  
1.931589656 0.6888753 0.455223692 1.481826 0.2342072 6.661459 0.2869008  
0.2285734 1.879492 0.300259186 2.612458918 0.7671382 0.5502027  
1.693155 0.924533313 0.3792652 0.2334501 0.2151009 1.793935008 1.51798  
1.660247 1.198194694 0.2339262 9.923746614 0.186045672 0.04592464  
0.138348653 0.09172688 0.5575997 0.598606459 1.211887 0.1226154  
0.634482436 1.545917 2.82548045 0.714571032 0.1538041 2.21312614  
0.8019625 10.83486 6.855153 0.5470728 1.006558 0.857350207 3.336558  
2.098537 0.1732087 0.286952 0.3643452 1.920922 3.00892 0.6853164

0.7522276 2.059765 3.861063 2.876804188 1.597728554 0.6662625  
10.310235044 1.134333765 0.180493 1.633177633 1.090603 0.06056246 0.4103284  
3.355041754 0.210658566 0.640548225 0.7888947 0.8865 3.631642 1.556368  
3.533303 1.124871 1.106524299 0.7513457 1.461713 0.979026828 0.9760976  
0.5350049 0.320706254 0.706868 0.3014815 0.838568289 1.248409 3.151615  
0.466640466 1.365206 3.579532 0.2837593 1.570542117 2.156829 1.8648  
0.069862482 0.1191282 0.66701309 2.916588 0.280568 0.380299925 1.30956  
2.948663873 2.10053 6.262106 0.2454222 0.337115 0.1653646 1.79064783  
0.3545377 0.3410891 2.559793 2.14246 0.7284921 0.07805009 2.083716  
1.654824 1.572318986 0.112414346 4.206389 0.6056893 1.402934 1.24175  
1.477344076 3.36447 3.601432102 0.7920782 3.103166 0.132298277 0.65094895  
0.616615 0.5737409 0.464158058 1.568299 0.9904831 0.7254001 1.524799  
1.012356 1.352483 0.6925214 0.1650179 0.3021972 1.629642 4.479118  
0.1965446 0.07408691 1.073704084 1.782876 0.4267523 0.329118633  
0.6438776 0.9596182 1.591748 2.157313 0.2973704 2.723457384 4.07476  
0.3454839 1.560994 0.02466112 1.996085 0.135387402 0.7861261 1.271607  
0.3009343 1.661954063 0.113268569 2.036223 0.405091 2.476632 0.961661376  
0.6913015 1.739722 0.43080265 0.8273574 1.72885 0.05541549 0.8361586  
0.3494585 0.9204773 1.611227379 1.101497 0.181641535 0.288218 3.380048  
1.786737 0.4121735 2.735224 0.3643377 0.4020164 1.299729621 2.07057  
6.375348 0.188844619 2.017491 0.09907673 0.8077197 0.5042595 1.391016  
0.189714 0.5314765 4.967339 2.565647584 0.2930722 0.303028961 2.058757  
1.760062 0.5099686 1.147665014 1.609483736 6.323073 2.352608 1.401812  
0.6344594 0.4411902 0.397128012 0.2327992 7.142791 0.08982995  
2.479309993 0.2493553 0.0600876 1.163476183 0.1483259 0.350472103  
0.2972296 1.64696 1.827416817 2.59643 0.6125895 10.25368306 1.69935577  
0.3115524 0.0973845 1.192212 0.3848189 1.408798 3.071639 2.531101  
1.050631 0.2843231 0.493581179 0.1247192 0.177298384 0.6472086  
0.22600735 0.7056028 0.1740336 1.972844814 1.92294 0.09604429  
0.3063123 1.386388693 0.3161184 0.3025429 0.254674703 1.364510706  
0.825336 0.5177043 0.355655 1.58679836 1.392705735 4.013155317 0.418509  
0.2684597 0.11734 0.1797863 0.1053323 0.3494186 0.3153524  
0.2715057 1.25626 0.2520091 0.4364241 0.530098359 0.5834535  
1.956052 0.5206619 0.5309347 9.571052 0.7182033 0.4352944 0.256162  
1.299606 1.211643 1.756443832 2.364767 0.3628137 0.7453521 0.401663  
3.899654609 0.6935504 5.163742 1.615459 0.0684083 2.476539 0.1119321  
0.276582 1.520763513 0.1574615 0.1501573 0.138094962 0.8949331  
0.6793158 1.321288 0.5120773 1.071525 0.24219789 2.339415246 0.6240794  
2.896337 1.619418 0.100382436 1.692995158 2.164817286 0.8310342 0.3659371  
0.3623082 1.389492 1.009024 0.0961689 0.2351169 2.863874999 2.932521215  
0.4498444 1.261456353 8.788861 0.591402019 1.909136 2.257175 0.2903711  
2.816239 0.9753821 0.9797232 1.968931 0.3602411 0.3591226 1.525853826  
2.954294 0.1509602 0.4627941 1.139956 2.898595249 0.7334055 0.1489693  
0.5707232 0.769664439 0.8700027 0.6860583 0.05267887 0.1851972

1.223193 0.3075196 3.72194 3.23313348 6.666438661 2.726014022 0.41231  
0.345263102 0.155321698 0.9659375 0.1324449 1.589301798 1.227981  
0.2749245 0.6573954 2.762434998 0.1560154 0.151449 0.03758069  
0.567986656 0.2838529 0.7050119 0.2269317 0.709747 0.2920224  
3.538062 0.3775042 0.5389632 4.557331 0.804379 1.030421 0.057562702  
0.3759072 0.8529121 0.4161753 0.6333739 0.3057159 0.3774428  
0.1221294 0.041904168 0.224234348 0.359495917 0.1649181 1.37217  
0.2871964 2.021474 0.9911487 2.298742406 0.3287965 3.69881 0.1169513  
0.09660175 0.5005931 0.121323152 0.5105066 5.390905 0.9211255  
0.5764402 1.181285 4.262 4.500392 0.795013063 0.4862541 0.7562373  
0.73280145 0.08935964 1.006395 1.188734 2.060081 1.742388 1.814679797  
2.542714062 1.716144557 0.03922626 2.148213 0.1905809 0.2575835  
1.299131 0.2521828 0.819254596 0.6242521 0.978337138 0.04287917  
0.4840247 1.325335 1.829265 0.2323405 0.508788228 1.044422 0.5309262  
0.7240413 0.6676814 1.287718 2.047492 1.268768 0.764367742 1.147663  
0.599191844 0.237712 0.127808 1.081453699 2.831888 1.113178 0.2970115  
2.406072682 0.5146183 3.254756 2.025353 0.566584421 0.1672726 0.3842885  
0.07709393 0.1631135 1.181164 2.211076 0.2237132  
AC135050.3 0.457707 1.899504873 0.4001288 1.396961565 3.055547226 0.57506598  
1.072575 0.759451367 0 0.2946596 0.600209124 1.215256 0.4734172  
1.056215 0.666117 4.892618 0.942226 0.529715116 0.6311513 0.66714 0.370864438  
1.026409 8.846533006 3.133713 1.552404 1.686625158 0.9623781 0.1132794  
0.07562159 1.758608 0.03790987 0.558651533 1.34452 2.277385473 0.4996347  
1.717796679 2.088652279 2.393772009 2.258459 2.051811 1.275221998 2.254497  
0.109526743 0.1189519 0.751997661 0.9706854 4.852077 2.269601 0.492087551  
0.1412628 1.255336 2.396814 2.273262736 0.4847332 0.667533299 3.203187  
0.4279557 2.84365 0.3289122 1.487114 0.2192172 2.812322 8.335241409  
0.2285704 0.3957329 1.503765 0.1717275 2.564744 2.075767 0.3486248  
0.9628605 2.405661427 0.2841125 0.04262249 1.338064565 0.5263235  
0.892197883 3.111693 0.3606627 2.205786 0.1874333 0.05599793 0.9983689  
0.745409589 6.28146621 0.8656645 0.4005293 0.8296084 0.781648323  
0.5068131 0.3050276 0.1806765 1.739073428 1.069994 1.460951 1.672313308  
0.2292373 5.332971095 0.546949415 0.2700246 0.58103793 0.4044971  
0.5245659 0.659933624 1.135961 0.2002627 0.552679578 1.038809 2.28830164  
0.47744167 0.2009616 2.724399054 0.8644763 9.347973 5.733247 1.072214  
1.831852 2.668759456 5.026116 2.339237 0.8023922 0.1323295 0.4036128  
1.333997 2.865314 0.3223582 1.444211 1.645836 5.85568 7.834241577 1.114568105  
1.271452 5.315029953 1.296862656 0.4180685 1.357950222 1.767535 0.1582627  
0.482524266 9.003490498 0.302772817 1.394908286 0.1982261 1.339293  
1.180963 1.57601 5.616911 1.701833 1.841900288 1.004025 3.183141 2.229962991  
3.524066 0.5646102 0.463146296 1.794721 0.382332 2.095486904 2.388513  
2.291425 0.946110768 1.166323 2.741181 0.5252461 1.521370957 2.573074  
2.633058 0.342310601 0.3372498 0.450788357 2.536084 0.04582403 0.392291564  
0.5264864 1.644826036 2.138624 6.000216 0.8245811 0.8919657 1.188366

2.456657157 0.2560019 0.1823193 4.546626 2.55803 0.4230458 0.06118849  
1.599877 1.470803 1.684133041 0.044064421 6.495389 0.9892475 1.532578  
1.147981 0.992730095 1.765339 2.753879039 1.407993 5.904785 0.400725293  
1.23593314 0.2417021 0.1204801 1.405913049 0.8658383 1.143956  
1.047583 2.2341 1.350309 1.361194 0.7891164 0.2156135 0.4845923  
3.321711 6.008931 0.1400763 0.1452037 1.866774829 1.113221 2.955268  
0.602040321 1.187711 0.3908086 1.473184 1.304427 0.3067471 9.84262979  
2.225002 0.3693369 1.643862 0.0483336 1.374539 0.568601242 2.054316  
1.625372 0.2621353 2.598895137 0.221996305 2.625537 0.3969711 1.605547  
1.122842075 1.683347 1.486279 1.090599135 1.986395 1.016517 0.2172188 1.00849  
0.3965254 0.8788979 3.319803771 0.5782596 0.457715863 0.8002489  
6.624593 2.301213 0.2203155 3.167743 0.3021063 2.410097 1.163606271  
5.384057 5.593051 0.134588593 1.416886 0.2219218 0.7336126 0.6963049  
1.13245 0.6971673 0.8333173 2.667272 2.468507252 0.2871977 0.362944858  
1.729277 1.19284 0.4797566 2.581188245 0.742222291 0.5790962 2.608188  
1.640825 1.865226 0.5534039 0.09729194 0.1878741 1.312428 0.2816939  
1.997682093 0.3909714 0.1962772 0.960130387 0.07267641 0.539702506  
0.3372621 1.111831 2.558267259 1.031058 1.200621 15.45869641 1.882505084  
0.4070766 0.3499191 1.350864 1.696974 2.729013 3.131864 2.044121 0.7190661  
0.3714986 1.238240178 0.08147953 0.27799123 0.5919533 0.590605695  
0.7298737 0.1894947 1.007265567 2.401681 0.2258859 0.6003448  
1.720892276 0.165217 0.3335384 0.133103928 1.604591654 0.6681329  
1.283239 0.3372833 1.655965199 0.919749503 6.8136547 0.4687087  
0.3946178 0.114988 0.02516894 0.1651536 0.4382907 0.6592668  
0.248326 1.477295 0.4067539 0.5068755 0.115438395 1.504628 1.591342 1.40312  
0.3947046 7.579155 1.840727 0.2694121 0.4685843 2.143302 0.9659847  
2.639229634 2.603783 0.3828906 0.7939259 0.2624079 8.102389462  
1.576784 8.855415 2.846636 0.3016669 2.567588 0.1462513 0.2581315  
0.819654276 0.112222 0.2648654 0.481162353 0.2769457 1.686438 0.8632022  
0.7025381 1.277084 0.921449853 1.806230034 1.546913 2.176016 0.9975162 0  
1.786679831 2.811526462 1.520169 1.649569 1.158571 1.521833 1.793634 0.1884825  
0.6528116 5.249512103 4.294820468 0.9306358 1.419307486 3.445077  
0.837124363 1.791257 4.375248 0.8220356 3.233692 1.93442 0.3241846  
2.510178 0.5043147 0.2346161 1.57833927 3.181403 0.1690677 0.2093158  
0.8663271 1.893662821 0.4636804 1.265188 0.8451392 1.382767588  
1.389363 0.7043211 0.7227213 0.12099 1.839062 0.6750364 4.255224  
5.764594585 5.190454118 3.801568295 0.4918813 0.43785495 0.190260432  
2.697741 0.2595802 1.779937108 1.091943 0.1197395 0.4509528 1.819146504  
0.3737266 0.04947108 0.1104822 0.371067748 0.3245238 0.5454318  
0.381228 1.095972 0.176104 1.255816 0.5857341 0.2347377 5.38258 1.086041  
1.521566 0.037605922 0.1768187 0.8611437 0.3191739 1.561706 0.4194231  
0.1541155 0.3889645 0.109504581 0.202836621 0.156573327 0.3232248  
3.386565 0.3752528 3.322891 1.277302 3.595600165 0.2013787 2.603353  
0.534833 0.3155514 1.387098 0.079260856 0.4841358 5.282847 0.5119575

1.749323 0.9873702 4.300321 2.193172 1.695639023 0.1701812 1.2431  
0.604726552 0.2001565 1.245754 0.9824508 4.06581 0.8278607 1.602429014  
2.847710308 0.92224738 0.03843999 1.178886 0.5171839 0.2969651  
2.838366 0.5869287 1.806374276 0.8682751 0.65597098 0.08403935  
1.078006 0.1855385 1.100966 0.1992229 0.770547873 1.056503 0.5395538  
0.8054104 0.7231715 1.453104 2.829611 1.289386 1.16178616 3.655142  
0.726986392 0.3660599 0.2504922 1.652004472 3.881001 0.7409646  
0.3175178 1.775660337 0.2593558 4.658372 2.646342 0.53608172 0.7540305  
0.2510571 0.3324139 0.3907296 1.72571 1.981993 0.2046137  
AC090198.1 0.5974336 1.876627223 1.602044 1.93541956 1.050527148 1.915832732  
1.701693 1.261790325 0.8405493 1.268046 1.097227554 1.518235 2.653669  
2.567546 2.03201 1.546513 0.7784534 1.299462784 2.386627 1.324332 2.001045923  
1.383349 1.742421312 2.335003 1.304156 1.659710313 1.559625 1.37145 1.391325  
0.881119 1.069718 2.050346013 1.911432 1.467603288 2.170555 2.115831351  
1.194655889 1.585670337 2.014067 2.347167 1.502427973 2.553745 1.016265554  
0.8844871 1.33816201 2.422723 2.343557 0.7013016 1.319741897 1.840415  
2.048985 3.288912 1.404589286 0.8523026 1.344296557 2.047688 1.400684  
1.297079 1.353486 1.11387 2.267409 2.687421 2.115329972 1.533974 0.9739871  
1.610608 2.040872 1.135355 1.905023 0.9056289 1.425423 2.425691492 1.530256  
1.68215 1.176008462 2.36472 0.419946272 2.234649 2.206677 1.079793 1.620018  
0.7900583 2.527023 1.316465468 2.385161783 0.6601841 0.7460194  
2.650956 1.361570729 1.68777 2.239006 1.590324 1.513682576 1.711636 1.411702  
0.732654081 3.400324 1.515193419 1.633725904 1.089711 0.878851738 0.7112241  
1.150147 0.657069086 2.152676 1.015634 2.002084706 1.892549 2.827116513  
1.626369738 1.42404 2.18706926 1.4609 1.389327 0.8501815 0.7069745  
1.759721 1.69606935 1.030398 2.220172 0.9178958 1.305637 1.243072 1.876445  
0.9020229 1.434072 1.87009 2.830049 2.026756 1.81049963 1.447034159  
1.637923 0.707435746 2.013382224 2.152121 2.015754984 1.191238 1.553965  
0.873973357 1.224757362 1.028574368 1.349699634 1.315211 1.235328 3.639076  
1.114681 2.00979 1.415862 1.852156195 1.410169 2.076919 1.127170154 1.094224  
2.665559 1.330846739 1.422741 1.941651 0.806877173 2.199198 0.90225 2.260809687  
2.544163 2.808021 1.201709 1.544747772 1.492757 1.416129 0.757066044 0.450096  
3.618347019 1.112875 2.769542 1.271491088 0.6210947 2.186721038 1.335369  
3.547525 0.910526 1.014065 0.4325459 1.20441026 1.45032 0.8226692  
2.256803 2.567376 0.9981321 0.8574573 1.460932 2.1427 2.18617008  
0.285642227 1.64326 0.9581292 1.254735 1.05934 2.591976358 1.435399  
2.513101241 1.610672 1.407244 1.743753083 1.79391027 1.082938 0.9264776  
1.553106369 0.767618 0.9847751 1.390978 2.854414 2.253978 1.454694 1.191576  
1.007158 1.59632 1.778144 2.273403 1.088298 2.152453 2.05136971 1.745124 1.21194  
0.926470117 0.5661169 1.131633 1.734814 1.234922 1.959209 1.59509115  
1.196892 1.396606 1.253663 0.03686079 1.82439 0.766086554 0.6765247  
1.125935 0.8558773 1.697915394 1.481389356 1.882181 1.857213 1.096303  
2.523074163 1.612548 1.455751 1.214052478 1.043419 1.615061 1.580655 0.9133152  
1.807547 1.261178 1.898843176 1.991848 0.824190889 1.817425 2.225764 2.002967

1.44217 1.324057 2.031675 0.8483164 1.229174719 2.527983 1.349968 1.007171301  
1.218776 1.343381 2.421946 2.201184 0.6797192 2.392572 1.954209 1.76081  
1.682106102 0.5788553 1.98788142 1.373753 2.114435 1.882748 1.708375528  
1.282441143 7.264941 5.416716 2.240783 0.4346473 1.721148 1.010947953  
1.606771 9.892234 1.644784 0.82351226 1.590227 1.698952 1.607466703 1.205503  
1.983138474 0.654709 1.586428 1.918501287 1.591662 2.054723 3.04557106  
1.794574911 0.7890603 1.886213 1.914247 2.381629 1.548683 1.678558 1.977159  
1.483128 0.4692437 1.342708478 0.800039 1.417784781 0.9915621 1.266792789  
2.072698 1.56076 1.127480688 1.049648 0.7967393 1.18863 0.483519001  
1.126124 1.328362 0.932617682 1.960208633 0.3017013 1.086746 0.947439  
2.441080158 2.211770467 2.240693247 2.178227 1.387707 3.705054 1.650741  
1.157179 1.843624 1.469056 0.6019626 2.863526 1.379299 1.697239 1.969829997  
1.841702 1.565281 2.149858 1.416137 5.473043 1.651527 1.763553 2.112239 1.646396  
1.90312 1.932544004 1.98573 0.8551571 1.610561 1.682834 1.361641956  
0.373192 2.436058 2.337081 1.009712 2.31354 1.366317 1.978438 0.852402478  
1.315857 1.374688 1.404731016 1.267247 1.370747 2.570529 0.848316 1.66653  
1.490634698 0.715235235 0.754476 1.749691 1.426385 1.144061398 1.516681818  
1.091573385 0.9799107 2.023764 1.923889 1.1606 1.788771 2.055523 1.530173  
2.517553864 1.529309027 1.307403 1.562511635 7.115681 2.062582555 1.973214  
1.742502 2.399141 2.4236 1.592404 1.369295 1.478616 0.5576799 1.69085  
2.233167524 2.038043 2.80437 0.7715502 1.147513 1.883274678 1.692946  
0.5566581 2.265336 0.952684433 1.149879 1.550377 1.377927 1.368685 1.99109  
1.728273 0.647103 1.451439729 1.214822385 2.174400209 1.808637 1.328100856  
1.378438849 1.47085 3.157531 1.51580603 2.668205 1.232783 1.06244 1.618564037  
0.7643614 1.471402 0.947895 0.884338742 1.370047 1.282556 1.883733 1.237662  
1.762722 1.748891 1.398876 1.47131 1.01136 2.591622 1.629829 1.476994558  
0.7978492 1.429367 2.636968 1.129931 1.353718 1.110692 1.237889 0.741166995  
1.920732175 1.903064017 1.568026 2.620686 1.293772 0.840654 2.486015 1.775771938  
2.365101 1.931949 1.160519 1.131054 0.9223901 0.982262461 1.759938 1.474333  
1.530918 2.133156 1.68776 2.288617 1.545323 1.668862191 1.142114 2.196874  
1.426788744 2.628371 1.929795 2.402949 3.143785 1.118022 1.639355166 1.900287367  
0.424070239 0.4910362 2.295806 1.605076 0.9795057 1.615515 1.38406  
1.637813434 1.076034 0.240511979 0.608866 1.085202 0.9374222 1.64159  
0.3744085 3.067852584 1.133049 1.374054 1.579454 1.831815 0.5686737  
0.9220348 1.346222 1.439776181 1.614892 1.167488142 0.3426168 0.1528269  
1.931408505 2.744956 1.381316 1.513434 1.459624811 0.7527131 1.784315  
2.256044 0.905274062 1.862657 1.364184 0.6741054 1.191933 1.797577 2.196847  
1.482428  
AL122035.1 1.782049 5.991289543 1.45508 1.63461436 2.535330065 2.965029189  
1.813767 3.040895878 2.147838 1.649482 0.547634656 1.435921 2.628068 1.662922  
0.8586216 1.497808 2.628097 0.576586878 2.948369 1.569812 2.603738072  
1.618058 0.53717265 3.054237 1.821782 1.510147781 6.162446 0.6935788  
2.592858 0.7011382 1.516464 2.650865007 0.811282 1.189871799 2.068553  
2.359504044 3.186579897 1.653544049 2.497948 2.781736 1.1478187 1.894621



1.54983661 2.694748 2.718715701 4.178279 1.98053 1.341697 1.821141468  
2.075792 2.449547 0.8267627 2.474412045 1.626843 2.860987036 2.922609  
1.426584 2.174525 1.991463 1.907755 2.684414 2.461845 0.965515863 2.425755  
1.439094 2.527451 0.8177873 2.382559 3.848708 0.7470872 9.108866 1.882909169  
0.898764 1.670182 1.625199573 1.606597 0.477984877 1.552389 2.462522 0.7300229  
4.386394 2.83431 2.585619 1.281105859 2.154605293 0.6323079 0.7797158  
3.142496 1.392238401 3.144453 1.543883 2.261632 1.944394073 2.130499 1.490834  
0.377612873 1.534556 0.170731125 2.321849991 3.269834 1.075166671 1.651084  
1.391769 0.29930323 1.011662 0.9155285 3.496703205 3.062388 2.577959022  
2.364580507 1.121061 1.199843593 1.636003 1.081608 1.323754 1.896519 2.473257  
3.792513858 2.117749 3.399629 1.00776 3.132841 1.343325 3.097676 1.251167  
1.403528 0.7123135 2.180182 2.059234 1.792703241 2.014762787 1.68319  
0.614009035 3.508872446 2.284057 3.99881069 4.127513 2.325598 2.035228866  
1.114906183 0.921280131 1.423440501 1.359326 2.03895 1.667624 1.369604  
2.104278 1.610342 2.425258737 0.8742931 2.050007 0.846725905 1.520657  
2.589972 1.431362651 2.853176 3.376592 1.475880188 2.71083 2.277296 1.441758131  
1.736262 1.024078 4.111357 1.935196723 2.220596 1.379551 2.06792946 2.922611  
2.3184455 0.3286297 2.244544 0.608479879 1.289413 2.540387336 2.924375  
2.523397 1.514605 2.454197 0.7349536 0.573007306 2.687023 0.9674527  
1.951842 3.152125 2.244835 4.021141 2.062234 2.062758 4.972915862 1.043205126  
2.6513 3.165736 1.950308 2.436642 3.511857918 0.5510313 2.466435319  
3.183049 1.108704 2.482396757 2.506153457 1.118129 0.9507707 2.295472579  
0.6714969 1.924367 3.756809 3.150265 2.024711 3.333688 1.236875 1.276138  
1.032965 2.642193 0.8048042 0.9720023 2.48932 3.574395532 3.78664  
2.367053 1.123391601 1.090804 3.230299 0.8843044 1.65241 1.277128 1.514319567  
1.719103 1.582944 3.802302 0.7891559 2.330564 0.557022454 0.6860737  
0.928826 1.364236 2.432817862 2.627830807 2.722109 2.792012 2.011787 2.455305642  
2.781965 1.57021 1.579609715 5.295088 1.625119 2.0984 1.466494 2.236534 1.66158  
4.428809615 2.297408 0.539734847 2.67082 3.025498 2.450382 1.938465 1.442209  
2.242078 1.891842 1.591767635 1.738459 2.671574 2.279869582 2.689987 1.517289  
1.386914 2.475456 0.513606 0.9106273 2.857218 1.333696 1.492740412 1.60771  
2.208744425 3.105782 2.579231 3.426989 1.986777466 2.158601716 2.931069  
1.140659 1.651024 0 2.202422 1.231096836 2.497799 5.357093 0.9486042  
3.261670035 3.324738 1.121635 1.273700243 2.076563 1.361834456 0.6758063  
5.270273 2.053668423 1.900655 3.127123 2.1033196 3.428265553 0.4984838  
3.142273 2.02676 2.03954 1.179459 1.818126 2.665923 1.120673 1.326841 2.590314027  
2.128541 1.985741897 1.139087 1.235506846 3.449613 2.289509 0.689666759  
1.266878 2.089924 0.6785995 1.109110955 1.854561 0.8168658 1.983067023  
2.377280874 2.038221 1.388666 2.569894 0.890255703 3.633145396 0.970623612  
1.626206 2.040294 0.328552 2.054701 2.797626 1.967925 1.278228 1.158425 2.361769  
0.8064292 1.681041 3.015670666 2.137282 1.269589 3.457195 2.812123 7.424816  
3.358981 2.510962 2.185915 2.256877 1.150034 2.747858795 3.486039 1.384274  
1.892546 2.843287 1.432004316 0.2663233 1.790097 1.87334 2.024886 2.29708  
2.447583 1.095792 2.585297972 1.099367 3.507674 1.546663579 1.733344 3.188256

1.879165 2.457971 2.525324 3.259698663 1.531253616 1.674001 3.514223 2.276439  
1.124283288 1.944773925 1.001554022 0.6500534 2.810397 3.600199 1.209675  
1.539348 2.800438 1.912284 2.043858992 1.649946002 1.479488 2.205212587  
5.702994 1.103950436 3.542056 1.706523 3.123103 2.867443 2.526704 2.748314  
2.263315 1.317453 1.034273 2.034471767 2.129689 1.794269 1.480941 3.015067  
2.966490273 2.952548 1.708181 2.516255 0.872286364 1.624005 1.097693 1.601438  
2.568067 2.975877 2.223982 0.9098075 1.005863749 1.256578027 2.474381958  
1.720946 2.274674557 1.863860376 1.738688 1.398618 1.041371083 1.619115  
2.859215 1.604045 1.308289215 2.745871 1.292364 3.246971 0.605852433 2.422212  
1.246758 1.971064 1.961483 0.8625892 1.56009 1.233181 2.155853 0.7960403  
1.144006 3.252177 1.228004302 1.106671 3.225559 2.431911 2.582531 1.687552  
2.893728 2.051774 0.938653361 0.772746062 2.10904271 2.16959 3.211894  
2.654971 1.930181 2.997885 1.343880176 3.583882 3.073486 3.181075 1.957795  
0.8838057 2.868618524 2.186944 1.812594 3.651506 2.052871 2.223595 1.212302  
1.089825 2.431804663 0.9169362 1.990612 1.697013885 1.85868 1.737355  
1.787397 1.820939 1.858547 2.83967476 2.564081407 0.354300812 0.4707152  
2.864284 3.706066 1.76975 2.07861 2.143553 2.851005994 1.80429 0.823862853  
1.269223 2.74574 1.779735 4.00998 1.71932 2.368177933 1.185924 2.107974  
2.598721 3.148645 0.6867829 1.553994 3.709189 3.044991495 2.123177 2.898947205  
1.30402 0.5316812 2.239245307 2.895765 2.184349 1.29605 2.210022316  
2.799523 3.46032 2.68504 1.094094055 1.043781 1.844585 1.060812 1.072924  
2.817614 1.809997 1.646529  
LINC00472 2.993651 1.565099129 0.9250198 1.700319566 1.005979671 1.105175949  
0.7842937 1.046991043 0.760395 0.2854534 0.142733095 0.1918454  
1.152445 1.77095 3.579876 0.6002651 0.3430267 0.515796568 0.5395756  
0.2558865 0.759318815 0.4523324 0.943913603 0.6088291 0.7718343  
0.723712994 2.035506 0.1994316 1.178482 1.221365 6.777961 1.183869081  
0.6174953 0.861279008 1.47069 1.532561099 0.642995775 0.580317279  
1.824152 1.161087 1.53508705 1.461392 0.576094341 2.582825 0.560386623  
1.829752 0.6468183 0.2755654 1.052435635 0.6263483 1.018183 0.6823653  
1.30110857 0.7234472 1.191533852 0.970599 0.8557457 1.361308 0.4861238  
1.295201 0.6575243 1.078167 0.470051843 1.013464 0.3049524 0.732511  
1.052561 0.6112674 1.908663 0.443274 1.536339 1.717380825 0.8938548  
0.4724622 0.71926551 0.8117143 0.570847601 0.7033769 1.706046  
1.570443 0.7984744 0.3724358 1.993358 0.926038979 1.273488751 0.1841904  
0.3334866 1.133819 1.371480853 0.8768373 1.173466 1.040652 3.308201286  
2.998353 0.7274471 0.111362853 3.049262 0.668196893 0.4992919 1.003593  
0.292988475 0.2110011 0.05700699 0.210372877 1.611585 0.9401821  
0.426441869 0.9896881 0.877344021 0.448293183 0.8997843 0.495532693  
1.255468 0.369559 0.641939 0.5942644 0.3859008 1.295451168 0.4581126  
0.9956316 0.1690332 0.6687098 1.121529 0.8079752 0.391044 10.57971  
0.3413643 0.9192758 1.116084 0.921041731 2.256390355 0.5601669  
0.287714564 0.758638556 0.6961799 1.315523082 1.114993 1.331213 0.19926491  
0.778363091 0.595856392 0.754923716 3.717312 0.7033467 1.731559 0.1790071

1.45998 1.810789 2.150189455 0.5630182 0.5627072 0.22994154 2.363512  
1.00979 0.5996727 0.9444069 0.7705596 0.257196664 1.261134 1.019898  
0.292003729 0.8678627 0.5271257 0.8864329 1.107355905 0.7621854  
0.4868762 0.575863268 0.192838 0.593749672 1.065684 0.8366246 0.752030791  
0.579309 3.13055491 0.4392628 1.047266 0.3808468 0.6289941 0.173759  
0.472929352 0.8489351 0.1347317 1.855441 1.91343 2.951552 0.2314073  
1.125554 0.9295246 1.789726344 0.511431399 0.7656125 0.6811585  
1.704712 0.8323746 1.55353754 0.4942895 0.648529742 1.374764 0.3696193  
1.048241937 1.611774556 0.3940032 0.2356763 1.078496795 0.141142  
0.7911207 0.5562173 1.169175 0.6899975 3.461498 0.8973603 0.478007  
0.1755429 0.7664003 0.8815746 0.3516453 1.675832 1.987398264  
7.061135 0.9598519 0.319655158 0.3436595 2.653374 1.299617 0.8329507  
0.6800467 1.066352697 1.082924 0.6341731 0.8872753 0.2899455  
0.6963288 0.395472101 0.5175388 0.4380588 0.8289848 1.179443982  
0.173702598 1.376428 1.25838 0.8326451 2.013402922 1.022663 0.6840882  
1.376366293 2.664461 1.61838 0.3918625 1.224749 0.6863419 0.3740123  
1.393836415 1.231706 0.424465841 0.7612147 2.084258 1.441785 1.098172  
0.6355443 0.8560011 0.6648646 0.97199044 1.241831 1.412218 0.68890166  
0.3953336 0.6511661 0.7301137 0.6942173 0.09298511 2.436583  
1.238867 2.86966 0.870367812 0.508295 0.6669434 0.8494369 0.7441545  
0.9384725 1.163714171 0.508162502 67.00105 0.3705015 1.154492 0.2162162  
0.7622865 0.501167938 0.7280172 23.93862 0.2938846 0.373172679  
0.7775425 0.4249006 0.438235522 0.5686618 0.665433112 0.1039579  
1.702502 0.583839239 2.5157 1.241395 0.06719871 1.454095227 0.4689323  
0.8919134 1.037948 0.9405318 0.6154792 1.320574 0.5559019 0.8737945  
0.6237545 1.079886234 0.6428552 1.083049551 2.23318 0.669116541  
4.578778 0.6968758 0.483054869 0.1011884 0.7904475 0.3613416  
0.147645228 0.931859 0.4059681 0.203956738 1.697282752 3.219257 0.7588974  
1.612782 0.479311732 1.648264046 2.123015518 0.8251751 0.4974653  
1.192144 0.3741787 0.7484315 0.8252083 0.515848 1.415647 0.6502049  
0.4016233 1.160906 1.445209585 0.9065261 0.466934 1.560322 0.8001748  
23.96856 3.346555 0.7905128 1.261441 1.194993 0.3096851 1.441568385  
3.456701 0.5135922 1.722831 0.5226402 0.490188606 0.290715 0.2034701  
4.18579 0.2360414 1.793447 0.5817133 0.7304829 0.422704235 0.2378158  
0.7560634 2.270698849 0.644075 1.28484 0.863035 0.702402 0.8956361  
1.074209774 0.462039607 0.6802595 1.986412 2.504148 0.821019288 2.024881568  
0.493310687 0.6088941 0.6874473 1.052747 0.7468421 1.439428 0.7128174  
0.4707346 1.932640034 0.205913788 0.8303837 0.949338824 20.59158  
0.680206795 1.209513 0.722727 0.9318265 2.166687 2.887713 2.061805 0.7035605  
0.6642511 2.998425 0.980403062 1.510182 1.482731 0.3321108 0.3389319  
2.18251883 0.9523764 1.021685 0.8298481 0.545076519 0.8071023  
0.8433517 0.7943907 0.9572136 3.15635 1.015503 0.3963727 0.918177772  
1.017661081 2.324715816 0.5223318 0.664441678 0.798939086 2.160244  
1.800912 0.448766794 1.371688 0.6128953 0.2646384 1.028014149 1.661506

6.593433 0.6963833 0.229856155 1.027795 0.6449075 1.230465 0.6431631  
0.8554698 2.456555 0.8161167 0.5624962 0.8291026 3.147843 0.9885256  
0.514937906 2.60565 0.2840563 2.243034 0.8146456 0.2812977 0.7677485  
0.6945378 0.535516523 0.859684403 0.80653681 0.8196144 0.7079235  
0.6402531 0.3750029 1.464448 0.502796938 0.8456268 0.5954344  
1.654008 0.5431919 0.1897147 0.86136423 7.732046 0.7588253 1.13499  
0.6558693 5.150499 4.204004 2.686012 1.529963121 0.8566594 1.222076  
0.690043404 0.9103182 1.577199 0.8968466 0.7290529 0.5982835  
1.605516655 0.955727894 0.445705893 1.218145 1.412925 1.243999 0.8597412  
1.290082 0.7774964 0.565364194 0.4220441 0.335599086 0.2137109  
0.9953223 4.899686 1.030805 0.06680717 1.229485349 0.7836126 0.5427999  
1.085343 1.603244 0.1346438 0.3220435 1.50933 1.343636587 1.044997  
2.078438161 0.2951058 0.1829328 3.024249398 3.466646 1.293753 0.5797029  
1.825931385 1.46564 1.461275 2.371386 0.314595735 0.393331 0.7857657  
0.4216767 0.3103614 1.333827 0.9725513 1.010164  
AC010201.2 0.2960789 0.622349179 0.3168183 1.412504125 0.962818193  
0.972641961 0.7593095 0.467040215 0.1281364 0.1264235 0.349923218  
0.6051038 0.4929028 1.597419 0.8318196 1.556427 0.3183558 0.498487318  
0.4107057 0.2475099 0.400980118 0.4358242 2.086010478 1.824702  
0.917911 0.604593888 0.7406529 0.3061953 0.06813531 1.3757 0.2732554  
0.314591812 1.544995 1.491070535 0.7717244 1.989952139 1.758480545  
1.594554741 0.6017115 2.211823 0.618681154 2.031309 0.197367924 1.303976  
0.978686812 2.093717 2.8983 1.997909 0.364550746 0.3252666 1.075888  
3.335623 0.948248763 1.908743 0.388436287 2.348479 0.4284328 1.999981  
0.2304952 0.9251656 0.2798135 3.195374 3.044627184 0.4530739  
0.2593139 2.909045 0.4212015 1.195264 2.409165 0.1701441 0.3572226  
0.953406017 0.1173271 0.012801 1.029171285 0.7834927 0.334947198  
1.962552 0.3741944 2.041134 0.4503415 0.5213613 1.323452 0.200306685  
2.457258879 0.5199777 0.1110395 1.006606 0.586889794 0.4667879  
0.1099323 0.09043898 1.067316171 1.849757 1.605513 0.737350581 0.7848655  
0.879350942 0.284730768 0.2838419 0.116337137 0.2834637 0.9452713  
0.418423913 1.199258 0.7578371 0.484133755 1.343291 3.4775144 0.544890285  
0.1609485 2.228602546 1.109337 2.033793 3.061141 0.3622756 0.7194508  
1.454611094 2.629479 1.420548 0.7693015 0.2483944 0.2890603 1.13071  
0.6504176 0.8390656 0.9217111 2.471506 2.380958 1.942918907 0.693396622  
0.608913 1.129448057 0.790113418 0.3090717 1.267214752 0.8765226  
0.1307123 0.084535885 1.671047295 0.223199444 0.460832911 0.9763596  
1.195836 3.038778 1.755902 2.472655 0.2439431 0.740555594 0.6633955  
2.283794 1.012389669 1.164238 0.7428864 0.268261947 2.174979 0.3131659  
0.135741489 0.6473672 1.331506 0.454639449 1.535081 2.190738 0.2134258  
1.094483047 1.700122 1.026857 0.061684599 0.2804891 0.568626544 1.607977  
0.5505014 0.424147214 0.7411969 3.030743994 2.071426 3.786171 0.2992439  
0.6349938 0.3893533 1.381946271 0.4503334 0.2281532 3.684519  
1.362582 0.825859 0.01837701 2.566872 1.846216 1.312935882 0.066170317

0.7127883 0.5110208 0.6092019 0.5792275 1.026964711 1.746515  
1.59795984 1.279449 1.844347 0.205305687 0.790282504 0.5807317 0.5307035  
0.384987286 0.8581355 0.3019246 0.5168843 1.350668 0.6621129  
1.065067 0.6635967 0.1133233 0.1536253 1.163895 4.779606 0.41018  
0.3706823 2.028558197 1.207334 0.2846919 0.232474432 0.2675329  
0.6675605 1.938963 1.175293 0.5711857 2.160212882 2.649113 0.4067235  
1.508553 0.04354874 0.5239656 0.330156378 0.4487141 1.23666 0.5018927  
0.947052454 0.266692551 1.924035 0.3118169 0.3924892 0.782851074  
0.8878253 1.759266 0.49659971 1.972376 1.539197 0.1196036 0.3786054  
0.2490069 0.3751058 1.142961399 0.6483727 0.244387273 0.7210269  
5.008767 1.26207 0.3455457 0.7501283 0.2474535 0.2505583 0.406142028  
2.196248 2.71625 0.050526988 0.6531541 0.1166388 0.9624904 0.9579244  
0.6550338 0.5862734 0.4755204 3.654898 1.894632062 0.2341217  
0.198190625 2.215942 1.859032 0.3962405 0.908114561 0.73840568 5.70466  
1.272909 1.466928 0 0.373964 0.379861576 0.8947405 6.622012 0.2220813  
0.470248911 0.05871109 0.1532669 0.486607888 0.1309634 0.574687175  
0.1381247 2.779085 1.536671571 1.927898 0.446442 1.54759302 1.464192146  
0.2648948 0.420371 1.853112 1.090106 1.031753 1.191435 2.747666 1.982908  
0.6415495 0.790258134 0.08564888 0.229598442 1.066704 0.321499864  
1.419072 0.2959412 0.888032448 0.832278 0.1469895 0.3328693 0.544045507  
0.2481018 0.2226068 0.119927084 1.624229169 0.2957144 0.4839919  
0.8509014 2.074285864 1.657394756 2.815482691 0.404712 0.5267437  
0.3626159 0.1587411 0.4464117 0.4936268 0.2475007 0.3302866  
0.9058517 0.1134363 0.3615514 0.433376585 0.3253619 0.9232834  
0.6129531 0.2586401 10.21481 1.268265 0.4045687 0.35183 2.294956  
1.317621 3.055729262 1.736053 0.5256925 0.92516 0.308076 0.940757732  
0.5062222 2.950874 1.753505 0.221469 1.732413 0.2415837 0.147299 1.331558153  
0.1516686 0.5921921 0.054191111 0.7624496 3.252234 1.012307 0.3014234  
1.15918 0.436080089 0.469447876 1.102053 3.168212 1.034942 0.118175979  
2.082524873 0.875103639 0.5761343 0.3015615 0.639795 1.058452 1.339819  
0.305682 0.2883262 1.588737085 1.498540004 0.3824764 1.485058984  
7.875029 0.812271224 2.64206 1.854253 0.8261172 2.695887 1.42851 0.7189942  
1.609055 0.04543892 0.535521 0.885686985 2.866454 2.094545 0.3248012  
0.6162344 1.491000575 0.7937775 0.146146 0.9107818 0.840023953 1.00525  
0.5095996 0.1240332 0.1695748 0.8383637 0.3330674 1.09542  
2.167436937 3.236003615 2.715494287 0.2743537 0.394508774 0.068570114  
0.7533667 1.57481 0.873141501 1.372028 0.2787046 0.2998954 1.079696333  
0.4999914 0.2525838 0.2322713 0.236819408 0.1949313 0.5678815  
0.1431199 0.3544779 0.965244 2.180996 0.3703498 0.4141865 1.956289  
1.767661 0.6148439 0.214592725 1.026692 0.1977767 0.7988242 1.058334  
0.1889508 0.1481158 0.2336389 0.073997995 0.263981574 0.305658364  
0.1294341 0.7029971 0.3662794 1.650503 1.174829 2.550084192 0.4354629  
3.825181 0.1070858 0.1705877 0.3251459 0.150763515 0.7270133  
1.770577 1.391919 1.390073 0.9509772 2.462278 7.345772 0.646896327 0.5111127

0.4882214 0.227025269 0.1878559 1.075661 0.9442042 1.814694 0.911662  
2.183298094 1.848882781 0.928706559 0.08081398 1.04532 0.2847682  
0.1337833 1.579557 0.2412183 0.614851944 1.114212 0.060618671 0.1135796  
0.5180197 1.267712 1.161542 0.04273822 0.96652747 0.5552824 0.6366116  
1.267056 0.3413038 0.2986013 0.9579898 1.170961 1.15695987 0.3272184  
0.596233578 0.08995123 0.03009258 0.608490573 3.885328 0.5316166  
0.5085949 1.451253551 0.3808126 2.760327 3.008839 0.52901251 0.541538  
0.4021392 0.1270632 0.1600221 0.8343207 2.280152 0.7023147  
LINC01187 107.2027 0.44396281 0.09175578 0.027106125 0.00971946 0.041109775  
0.007432805 0.021051591 0.1931644 0 0.006850727 0.01241073 0  
0.007319434 0 0.01873708 0 0 0.006803681 0.02284401 0.014392233  
0.02747042 0.042559055 0.03102317 0 0.126683809 0.05835509 0.01099016  
0 0.03174269 198.1015 0 0.01134285 0.026513727 0.02769922 0.047616416  
0.006643842 0.035729128 0.01413623 0.08531266 0.012689198 0.01929945 0  
469.7732 0.013896652 0 0.01046088 0.01518569 0 0 0.04158696  
0.006550266 0.008168435 0.2299143 0.250956028 0 0 0.1257201 0 0  
0 0.07889531 0.054639845 0.02661057 0 0 0 0.04576124 0.02730672  
0.008455734 0 0.081807793 0.02756407 0 0.056992631 0.008880511  
0.113609197 0.006708682 0.006361969 110.8989 0.04849183 0.01086563  
0.01335999 0.197923658 0 0.3536218 0.005978249 0.03863379 0.006894007  
0.05900409 0.005918642 0.005842968 0.007335726 0.005063847 0.01288534  
0.006904032 0.00889607 0 0.007075203 0 0.015032327 0.05232475  
0.008482069 0 0.02671729 0.0155433 0 0.01679722 0.008880272  
0.012352135 0.2014682 0.013911377 0.01524907 0.02856451 0 0.008668684  
0.006835496 0.019179119 0.04194619 0.01496364 0.0059882 0.05777264 0  
0 0.0258593 306.9497 0 0.03012754 0 0.080612809 0.005149206 0.12002  
0.019458656 0.035948347 0 0 0.007975954 2.211027 0.015604537 0.039258517  
0 0.033832855 222.7703 0.01404711 0 0.02959385 0.01492993 0.02251482  
0.017293332 0.02597565 0.04803904 0.020125292 0.02930557 0 0 0  
0.01348842 0.023917678 0.02260772 0.2126442 0.006119328 0.01996844 0  
0 0.013730288 0.007132424 0.04575303 0.464944779 0 0 0.03905495 0  
0.030447522 0 0.02587751 0 0.0058801 0 0 0 0.045398159 0  
0.005896095 0.02281579 0.04682554 78.68993 0 0.01633865 0.007317669 0  
11.243377755 0 0.11517 0.01749269 0.01782 0.005350713 0 0.010375777  
0.03502587 0 0 0.038679983 0.007816497 0.007792506 0.008023476  
0.01680041 0.05381066 0 0.01688947 0.03742984 0.02085167 0.006124689  
0.04183685 0 0.08263238 0.04554495 0.1494894 0.007043699 0.019757568  
0.03000075 0.01081942 0 0.02880738 216.5119 0.02522216 0.08727796 0  
0.00734549 0.03854742 0.08958095 0 33.26544 0.04103237 0.007355285  
0.01811872 0 0.006357971 0.026894933 0 0.04075595 2.210077 0.02897994  
0.046686883 0.04779958 0.02261899 0.218442139 0.007865974 0.008218387  
0.007024724 0 0 0 0.125690233 0.007480223 0 0 0.008988892  
0.3591565 0 0.07092197 0.01598716 0 0.006102212 0.007796288 0  
0.019586304 0.01918098 0 0.02247592 0.01307501 0.008138384 0.03607354

0 0.1358562 0.044350001 0 0 0.01118475 0.006255522 0.007757517  
0.007154917 0.009001129 301.9041 0.04518599 0.0296167 0.402135 0.02684511  
0 0.01562332 0.01697725 0.006832355 0.104762931 0.01264377 0.02285094  
0.00582188 0.0916621 0.009520171 0.00594919 0.02087763 0.024819836  
0.006453638 0.05546762 0.79987954 1.442365275 0.1843045 0.006172455  
0.01416847 0 0 0.00675217 0.04836996 0.05073634 0 0.007508236 0  
0 143.8709 0.121761378 0 0.3382734 0.063047124 0.02150831 0.8327712  
0 0 0.008014525 0 0.012913497 0.023062891 87.65167 0.005790581  
0.01308904 0 0.005756929 0.01774626 0.02273663 0 0 0.02441844  
0.01602289 0 0.007995106 0.01376693 0.0238874 0 0 1.915134954 0  
0 0.02475056 0.02088737 0.09191446 0.08403948 0.00435631 0.01948336  
0 0.007809838 0 0.02020913 0 0.1294024 0 0.243117167 0  
0.06545798 0.005636231 0.01951144 0 0.01418903 0.005008688 0.007229213  
0 0.005710389 0 0 0 0.007975836 0.006491328 0.2092539 0.016254066  
0.020219665 0.104706 0.02753648 160.6985 0 0 0.019837753 0 0.006958181  
0.0217553 0 0.7406795 0 0.2905939 0 0.061275814 0 0.035535119  
0.1299803 0 0.007723752 0 0.07361758 0.08654533 0.03532684  
148.0266 0.01453927 0.2642094 0.009104807 1.756937229 0.1605 0  
0.01353829 0.03538924 0.039723171 0 0.009442018 0.028939 0.012195778 0  
0 0.3706189 0.1799861 0.07646675 0.01403374 0 0 0.034728845 0  
0 0.007723614 0 0.009183503 0 0.040293448 0.004324014 0.005808451 0  
0.02521289 0 0.3071739 0.0142917 0 0.04497814 0 0.06164339  
0.08997081 0.00854264 0.03178354 0 0.01138691 0.1362282 0.01359557  
0.07515174 0.021890742 86.81956 0 0.481688 0.03107977 0 0.2452128 0  
0.005311966 0.091834558 0 0.006968595 0.1642791 0.006067723 0.07439555  
0.03098036 0.226955154 0.01562991 0 0 0 0.05251655 0.010252989  
0.05636395 0.03714 0 0.007071505 161.8172 0.03601806 0.03700479  
0.017784623 0.006604266 0.02783152 0.014667363 0.009709406 0.1712194 0  
0.01095715 0.04015876 0.007583644 0.097510442 0 173.5876 0.05990984  
0.005575136 0.005762201 1.417361 0.01198794 0.015577875 0.01531608 0 0  
0 226.5105 0.01095525 0.005522354 0.026384869 0.5124998 0.01495615  
0.03720925 0 0.007419867 0.04991339 0.005956848 0.023729336 0  
0.010850904 0 0.04860459 3.072430359 0.04048683 0.03993723 0  
0.005648239 0.005591605 0.01628637 0 0 0 0.01623806 10.60151  
0.006892339 0.02450125 0.006518283 0.01701535  
PCED1B-AS1 0.2760863 2.375930875 2.588273 1.210383764 3.215054139 1.432809761  
5.050827 6.811260737 0.9396461 2.536749 5.921646953 6.747714 0.5958034  
2.563582 1.542575 5.655747 1.795814 1.784584872 1.802483 2.188296 1.728729642  
2.667452 7.941383798 2.451738 2.261345 5.016923299 1.231549 1.718993 0.4996479  
3.189201 0.2146959 1.57177205 5.445563 8.578539862 1.321514 4.418778778  
5.857178443 8.739219169 2.438531 4.479899 5.27998674 5.88327 2.629586447  
0.1640975 3.525605743 0.3139487 6.208193 1.875177 1.271947647 1.791491  
2.445376 1.284352 3.949073773 2.432358 1.514606502 3.146575 1.191111 2.540342  
2.841867 2.19034 0.6287074 1.982891 1.758335656 2.383149 0.9090035

3.102095 1.783006 5.603654 2.38078 2.632501 1.20081 3.147611031 1.660592  
0.6808296 4.061447939 1.771165 1.906948536 1.722087 0.4237458 0.6059914  
2.322589 1.650726 4.204321 1.709107913 1.923953821 0.8071657 8.733285  
3.387625 6.454355538 0.9616555 2.112829 2.007105 2.464979344 1.758419 3.65476  
2.521427386 2.363472 4.039127348 2.578645968 1.999771 5.315595059 4.901395  
3.821397 1.597187351 3.599057 2.18688 3.618231018 1.919135 5.250216524  
8.291982095 1.313205 12.503655151 2.49926 2.469065 1.623042 2.380911 4.670514  
5.949453269 1.585287 2.620456 4.028839 0.7350129 3.300194 2.531201 3.391553  
0.3198734 2.691393 2.804839 6.894161 4.033441264 1.714842299 1.886239  
4.863883558 4.121559424 0.7985591 3.690319448 4.03509 0.5113467  
2.966254983 8.020850145 13.609687979 10.158356435 0.4202624 3.94223 1.55733  
10.96303 1.122917 0.4717917 5.547818579 2.89166 3.990628 6.837886757  
9.233284 1.386005 2.661379335 6.451428 0.9337414 7.863882956 2.038767  
3.045347 2.862250263 2.709853 2.26015 0.5922358 5.019588148 2.418016  
5.472819 4.230159713 4.226765 2.579145053 4.162075 3.406984 1.116533856  
4.381708 1.742965808 5.71425 5.452301 1.317143 2.105987 3.550691 5.571933913  
0.6479057 3.649168 1.627812 3.062796 0.5836035 3.429761 2.219303 1.736025  
2.601689107 1.76605409 21.83912 5.33811 0.4843755 1.073563 2.851120262  
2.088507 4.181481645 2.715642 1.551992 3.282640296 2.165268418 1.32204  
1.137197 4.959826081 6.714055 2.889443 2.395939 3.547568 3.673554 1.440864  
8.456765 2.293456 1.555944 3.827937 6.360273 6.717604 0.5798523 2.769953115  
1.284257 1.441278 8.480162382 3.433263 0.8867291 2.567114 6.871384 0.5657064  
3.589697391 2.382864 3.669369 1.697499 0.1824859 1.566104 2.526597643  
9.315544 2.423198 7.142053 3.990318265 8.026975711 3.255988 1.40123 7.428172  
1.688750538 5.872635 4.515455 2.115001365 2.407685 2.078869 2.870422 0.2105166  
1.900167 4.205 4.626793849 3.59956 4.09138242 1.062951 7.036581 2.237466  
1.446784 2.69807 2.305164 1.305689 5.822659171 4.498483 3.248745 1.495121693  
0.7942945 2.638506 3.784633 2.968151 10.49415 1.721047 0.8773144 0.9779924  
2.807940305 0.6315324 3.186225166 1.04631 2.36417 0.5631425 5.183270233  
2.633889942 1.446392 4.63285 3.828941 5.898639 3.601208 3.263590806 1.890243  
5.361713 3.967857 6.970007883 2.124305 3.072526 4.640200002 2.617291 2.486531884  
3.779979 2.390543 3.789247216 1.62281 3.794107 4.19031331 2.060752033  
2.482746 3.349036 1.685947 3.415703 4.03749 12.44605 2.389151 1.58051 1.894874  
2.30380452 2.360469 1.836747032 0.2517388 1.565191047 0.3570105  
1.717072 3.7888263 2.333985 3.974469 3.641364 6.970803004 4.726372 10.14429  
4.305419175 2.847879179 0.602557 4.450578 1.557503 5.020511536 2.227436165  
9.104123972 1.531413 1.343456 0.7430521 4.469905 2.374269 1.404183 6.156919  
4.244809 2.315061 2.185447 2.392167 1.450017504 1.691129 1.785652 1.463309  
1.370383 5.640551 4.150985 3.302571 1.812906 0.5818764 3.308128 2.954925775  
0.8620778 5.210595 1.194391 3.651167 12.15390837 3.552988 7.642071 5.28101  
2.720845 2.415853 1.614062 1.626813 1.56896365 3.071823 1.256426 1.279517216  
2.325839 3.389842 2.447282 3.036249 2.686961 1.366452445 3.147466826 4.915795  
1.270816 4.352167 1.849867796 1.692602052 2.182396579 8.614469 1.916317  
2.849227 0.9595646 1.789826 1.817381 2.749114 9.904033357 15.591642869 1.94176



1.934704511 4.766476 3.244762839 2.566464 4.546245 0.9320092 2.266917  
2.128259 1.314506 10.33145 2.006592 0.8789908 6.327018576 4.157842 1.196857  
4.989923 3.343694 4.303148641 1.504884 1.180063 2.281252 4.536174521 2.554026  
3.272861 1.176926 0.8843251 2.331976 3.448357 4.89919 4.326064579 1.762154195  
5.057869583 1.846919 1.635802508 1.668753819 0.8453515 1.522859 9.877892997  
1.851002 3.773148 2.240502 10.296127711 1.35182 0.7327543 1.582959 5.078569773  
1.33297 1.885056 4.359556 6.004845 0.6584961 2.854351 3.008313 1.099308  
2.962238 0.7020539 3.491039 2.118823722 0.1626176 0.7723655 0.3192886  
4.646098 2.479739 1.427821 2.38097 0.862658463 3.613098387 0.755990407  
2.925714 2.509498 1.139786 2.969406 1.800715 5.661645392 1.257445 2.087955 2.68129  
4.041527 2.530098 1.492429975 1.209212 2.168005 1.745107 1.20662 0.3015912  
9.434355 1.003899 3.041268296 1.957238 3.894955 5.515843967 0.9228269  
3.015005 2.453839 2.931551 1.858347 2.224784068 4.129177238 1.748873267  
0.1674601 4.65474 1.293424 6.891108 6.261332 4.028236 2.693047773 1.742269  
5.143813835 3.294984 2.642412 0.4041402 1.750427 2.182137 1.698154758  
2.272511 1.863622 3.586664 1.275173 2.804215 2.8464 1.538011 3.081122234  
2.296626 1.035380473 1.106628 2.677188 1.842199305 2.490632 3.28174 1.982638  
3.525355882 1.966791 1.840454 1.575566 3.308466822 3.675236 1.543341 0.6406875  
4.420499 3.208855 2.863487 1.26491  
AC016773.1 0.3942269 0.942593228 0.2240122 0.495323321 1.458258383  
0.406674826 0.5790359 0.344192631 0 0.02356647 0.41509255 1.199585  
0.406399 1.098171 0.9028731 1.045196 0.2857322 0.3361027 0.137414  
0.1537935 0.062288578 0.7529704 2.374038175 1.629096 0.7061553  
0.487358826 0.3535795 0.1902585 0.1693471 0.664004 0.2759101  
0.234570952 0.8018208 1.912492664 0.2397606 0.809056873 1.91693895  
0.824710249 0.4078707 1.087169 0.7322395 1.596288 0.081758118 0.832441  
0.821964431 1.210386 2.233515 3.680466 0.0918318 0.026362 0.5999515  
3.458589 0.40066072 0.1507656 0.163501961 1.054886 0.1397615 1.289737  
0.1227611 0.3568121 0.153411 0.9105424 2.648547255 0.1279652  
0.04028204 0.7675997 0.04807086 0.5116329 1.063634 0.04879444  
0.09512785 1.499541531 0.0994128 0 0.347151293 0.1024913 0.26535795  
0.6774765 0.09178053 2.403068 0.06995642 0.03135046 0.6745794  
0.021964097 2.245947662 0.153045 0.1034938 1.430526 0.437606106 0.1324118  
0.1878468 0.2191623 0.931289565 0.3652663 0.6506132 0.517922894  
0.2566771 1.697731569 0.061241967 0.3023467 0.130117721 0 0.4649908  
0.08210313 1.561012 0.1121172 0.154708934 0.6946623 1.383595051  
0.463312889 0.1125084 2.147399655 0.1319938 4.244465 2.464059 0.2501164  
0.2958355 1.10674517 1.543092 0.9066621 0.1382214 0.1111271  
0.1738175 0.3485248 1.566841 0.541417 0.5895621 0.6780274 3.480046  
2.757865572 0.713132995 0.2885768 2.863333903 1.223911244 0.07201717  
0.570186705 0.529297 0.06645257 0 1.982261386 0.323605179 0.683322435  
0.2885401 0.2431796 0.3395159 1.110028 1.550776 0.2381929 1.247405522  
0.374736 1.188055 1.65491628 1.91658 0.3160973 0.166688118 1.181051  
0.03891795 0.621084244 0.6849125 1.171303 0.388432343 0.3264832

1.430607 0.1383808 0.871548009 0.6173727 0.8800707 0.114985631  
0.0290476 0.378561045 2.028325 0.256546 0.131774747 0.4052862 1.418616726  
2.065359 2.782387 0.09617542 0.2404361 0.3024123 1.178880367 0.1433228  
0.2892027 1.557979 0.5404204 0.2072371 0.085641 0.9899753 0.6334072  
0.742253468 0.049338965 3.496583 0.2658387 1.034664 0.3342028 0.355081868  
1.017394 0.808301469 0.6669939 2.016536 0.092377849 0.3571291 0.135317  
0.1124181 0.509300613 0.3393179 0.3493332 1.340548 0.6659899  
0.5091232 0.8021738 1.024946 0.09053348 0.01507218 1.239774 3.679487  
0.176449 0.1016155 0.703077085 0.5539889 0.3746055 0.48150357  
0.6233816 0.232469 1.140113 0.8813768 0.137386 1.801476913 1.91299  
0.2240045 0.6902375 0.05411917 0.4143656 0.212221079 0.4443606  
1.395279 0.05503371 0.911795246 0.124284714 0.6908566 0.05128717  
1.275135 0.314311778 0.850479 0.6363072 0.630268216 0.6354765 0.6165225  
0 1.164495 0.1009068 0.3884616 1.087957102 0.3021562 0.056944977  
0.07906229 2.515746 0.5881529 0.1507534 0.8526259 0.1383826  
0.7005949 2.236042339 1.282188 1.732193 0.056512105 0.3505034 0.03106075  
0.6268782 0.2263509 1.526302 0.1301031 0.3032465 1.157287 1.126069763  
0.06890903 0.073889023 0.2904409 0.6497631 0.4476532 0.9083355  
1.012862729 0.6484145 0.8083221 0.8331637 0.3480824 0.2904594  
0.190641252 0.1352332 1.224606 0.1182798 1.450901276 0.07296182 0  
0.35275364 0.06103187 0.137342114 0.1544861 0.763014 0.811606566  
0.5958591 0.24006 1.73091139 0.513448778 0 0.178093 0.5518811  
0.6069774 1.168347 2.766436 0.7396744 1.903055 0.2599795 0.9748536 0  
0.136179307 0.6391387 0.206656762 0.5161516 0.06365319 0.709445232  
1.696242 0.1896935 0.2326869 0.583136059 0.1618694 0.1037398  
0.149036568 0.665430546 0.6102994 0.3508572 0.08811981 1.040152826  
0.913571473 3.328198169 0.2624068 0.04909488 0 0.1127267 0.1155766  
0.1226886 0.3921589 0.2383292 0.792603 0.04879742 0.0354718  
0.226198801 0.2021679 0.6884333 0.4284749 0.1205321 1.750317  
0.4243365 0.2262457 0.05621509 0.1739026 0.6309414 1.349089028  
0.6705552 0.1837384 0.6222716 0.1335538 2.361591252 1.461126 4.03699  
0.91068 0.1313576 1.594995 0.2251669 0.1300635 0.333733639 0.1570688  
0.1318089 0.084180914 0.1808895 0.7453839 0.920503 0.1311054  
0.2542136 0.203223109 1.147344136 0.6042136 0.7415394 6.638057  
0.110145317 0.666848914 1.459558931 0.6079053 0.2007635 0.2092343  
1.277998 0.7981838 0.1688352 0.1289918 2.441582015 4.031001182  
0.05484387 0.897128837 1.232243 0.396562174 0.6685571 1.415257 0.1416052  
1.310967 0.4586763 0.195456 1.363374 0.05646815 0.2364298 1.302197224  
1.709865 0.04732631 0.1953092 0.5871217 1.002861469 0.1687346  
0.1362147 0.9184706 0.563013056 0.2828493 0.1433871 0 0.06773629  
0.3860999 0.1754626 1.332947 1.478157451 1.963972501 1.553090667 0.17703  
0.356557465 0.04260695 0.3709586 0.02906521 1.37848953 0.6113249  
0.1173133 0.2163995 1.62467 0.019021 0.138482 0.08247133 0.155806813  
0.2855046 0.3664322 0.1422871 1.699145 0.1232398 0.6419325

0.1553322 0.1478453 1.179172 0.6864747 0.6659912 0.042107379  
0.2804774 1.70157 0.297816 0.4707887 0.3354488 0.06902529 0.08375458  
0.045979636 0.037852719 0.109572044 0.100532 0.5297562 0.1050427  
1.645669 0.3724468 1.455179348 0.2029355 1.367797 0.05703361 0.07066462  
0.3977539 0.029582813 0.6324351 2.957604 0.3771311 0.7753262  
1.887075 1.887924 2.322235 0.282225556 0.1524416 0.6959501 0.148118419  
0.07003605 0.6683762 0.4557354 0.8219774 3.514709 0.350095798  
1.101936897 0.151858983 0.2367271 1.099999 0.1126011 0.09975362  
0.6075819 0.1210603 0.898932724 0.2872434 0.254246953 0.09409892  
0.4586767 0.8309902 0.4899401 0.0637343 0.659775258 0.4436127  
0.2589166 0.3006062 0.3277502 0.9419715 1.238524 0.4468676  
0.92429017 0.4525543 0.109577893 0.1117848 0 0.4711629 1.425157  
0.8987968 0.2073896 0.472606869 0.1129337 1.12778 0.550292 0.171500315  
0.367082 0.1639802 0.1015102 0.05965912 0.3299012 0.97797 0.1309178  
AC093752.3 0.5965471 0.580862112 0.3987965 1.322694685 0.54916569  
0.784312198 1.030825 0.522637083 0.1063063 0.2097704 0.615805078  
0.7649745 0.503297 1.97381 1.519979 1.924866 1.115168 0.756730281 0.9435747  
0.4302415 0.813185109 0.7407867 2.441091647 2.963928 0.6769155  
0.813391604 1.07907 0.2258044 0.6783282 0.9171382 0.6989975  
0.835187142 1.252649 0.658242758 1.227143 1.426730871 0.955533431 1.361130414  
0.889484 1.551993 0.831022754 2.280034 0.363873532 1.496768 0.749493785 0.72559  
2.794088 0.07800153 0.31061775 0.3754464 1.113834 1.244885 1.174804091  
0.617319 0.602937784 2.44134 0.462075 1.094209 0.2731808 0.5028767  
0.3277309 0.7767233 1.824279483 0.7062089 0.2689195 1.234272  
0.9413565 0.8961407 2.068855 0.4126136 1.439482 1.062876418 0.2123749  
0.4672863 0.780649346 0.7412417 0.527978644 1.343911 0.5882103  
0.5050473 0.8717765 0.5023033 1.372475 0.293260914 1.499375714  
0.4995055 0.4759641 0.5622554 0.867573643 0.387263 0.3040119  
0.7052935 1.017361732 1.183479 1.141704 0.904297883 0.2056266 1.511188367  
0.490615447 0.4261154 0.328158529 0.4255476 0.4356828 0.255786334  
1.766884 0.3792323 0.550839358 0.8915517 1.254375338 0.571022357  
0.3505118 1.339799903 0.8028526 1.082075 0.606047 0.3339512 0.7022126  
0.664968366 0.2693216 0.9479517 0.1691716 0.2637778 0.5415159  
1.684104 1.062613 0.1070949 1.454396 1.733206 1.661067 1.094324953 1.666285502  
0.4623634 0.699647735 1.126360276 1.073743 1.860964525 0.7374349  
0.3154715 0.260497053 2.445030002 0.658395697 1.251237377 0.9285605  
1.100336 2.13138 0.7600464 2.07057 1.75399 1.273193543 0.85058 1.14564  
0.878677826 2.107399 0.669917 0.29674555 0.9414447 0.8833641 0.675694315  
0.8419055 0.4468296 0.722936434 2.393258 4.399069 0.9392155 1.481042434  
1.502068 1.860505 0.477639165 0.4524785 0.898574793 1.243759 0.4795502  
0.410534646 0.3607542 2.237490353 1.33219 3.337456 0.479404 0.428035  
0.1615103 0.777294409 0.2733745 0.4239953 2.714986 1.900109 1.054093  
0.1219695 1.531608 2.781461 1.142825869 0.153711957 1.120459 0.6310103  
0.1123143 0.8924438 1.786461205 1.086726 1.572212313 0.9355367 1.20645

0.34065705 1.410630216 0.2408973 0.4002632 0.515158777 0.9923987  
0.380049 0.7830711 1.055495 1.290881 2.749026 0.566272 0.3223434 0.3756502  
0.9974398 1.98851 0.506086 0.1989904 0.86262288 2.296079 0.4723799  
0.300017873 0.4993971 1.010285 1.144394 0.3586437 0.6725967 1.584669278  
2.930391 0.8129032 0.8191942 0 0.8167082 0.24557347 0 0.6209845  
0.4408804 1.433267111 0.719085701 2.446703 0.5630394 0.8001005  
1.079135443 0.5728877 0.7116196 0.385698266 1.494937 1.097561 0.1984543  
1.020837 0.7724464 1.129542 1.73507624 0.7684456 0.430847846 0.5747299  
2.239321 0.8725465 0.5123578 1.275021 0.6980055 0.6005181 0.344785156  
1.74199 1.749422 0.134140462 1.198701 0.2073589 1.154479 0.8954664  
0.6688469 0 0.7474884 2.126712 1.662972463 0.2862414 1.002996338  
1.407541 1.172803 0.5578524 1.176042895 1.271446967 0.1154336 2.390615  
1.673393 0 0.4309072 0.509081968 0.5082462 1.046447 0.4035867  
0.834080363 0.3571971 0.156499 0.702748042 0.1267602 1.173611988  
0.1680696 1.733685 1.253626673 0.8618794 0.8689763 0 1.0343358  
0.5409616 0.4121638 1.637472 1.080568 0.9759736 1.838179 1.465873  
0.9772798 0.2545549 0.424227819 0.2030206 0.467548235 0.8006902  
0.974933666 0.9380192 0.2832956 0.939143243 0.423498 0.2438949  
0.2991729 0.406222658 0.3087505 0.1662139 0.165825926 1.865790443  
0.6834322 0.7882002 1.098123 0.764843351 1.670736118 2.916925735  
0.2919676 0.7866078 0 0.3135642 0.4115092 0.6279451 0.6981387  
0.3005347 0.8588859 0.5646637 0.7262074 0.661560661 0.4948738  
0.9552309 1.48744 0.6258483 1.841268 0 1.01812 0.5671007 1.656302  
0.8223646 1.848933845 1.583019 0.9812975 1.060318 0.7846026 1.040645808  
0.1354771 1.344904 1.548856 0.1837382 1.57749 0.5466164 0.3087264  
1.02115641 0.4334123 0.4546382 0.569477808 0.9430804 1.371198  
1.167588 0.5668277 1.088978 0.765318136 1.125134969 0.3944042 2.050903  
0.7682415 0.294128338 0.890365421 0.58590725 0.7575539 0.9828721  
1.173337 0.5188936 1.168856 0.845347 0.5549559 2.45503094 2.958594905  
0.3905419 1.368950044 2.002937 0.770157273 1.56709 1.429334 0.9926117  
1.66703 0.7485095 0.9071799 1.717667 0.2764495 0.4910533 0.807240463  
1.743945 0.2738202 0.5041623 0.52261 3.341133079 1.247769 0.7759851  
1.461682 0.736064585 0.5822191 1.021056 0.5402362 0.140685 1.947497  
0.6247324 0.05048876 1.447314654 2.069268723 1.894455232 0.3151566  
0.61492312 0.379253869 1.580235 0.1811011 1.079189763 1.032782 0.5668687  
0.4012958 2.072102185 0.4063442 0.3944508 0.330343 0.462290286  
0.6468864 0.8697852 0.3799587 0.2940868 0.5923719 0.9795399  
0.5223329 0.3509342 2.351897 1.152259 1.295918 0.35606673 0.6461766  
1.03498 0.777605 0.5587459 0.4180266 0.7987322 0.1789243 0.122782468  
0.438016041 0.546181982 0.4653258 1.01755 0.4830877 0.5732008  
2.280879 1.036229822 0.4816996 1.79632 0.5711273 0.1258003 0.6069421  
0.250156998 0.884627 1.697855 0.9265118 0.9807181 1.05195 3.3918  
1.259251 0.867834329 0.2713833 0.6433067 0.583878251 0.4239163  
1.810676 0.6714374 1.44925 0.7735352 1.850291264 1.502591546 0.43255371

0.076624 1.734466 1.073879 0.7547396 1.268852 0.6157626 0.900179856  
0.6293702 0.050291295 0.1046994 0.7306033 0.5778771 0.9566207  
0.08509696 1.061622495 0.5264926 0.9794865 1.318769 0.9095351  
0.4954594 1.281904 2.463094 0.670373485 0.8757143 1.045046818 0.4311758  
0.09986327 0.605789172 3.098622 0.3282211 0.6856647 1.247527306  
0.3446563 2.028638 1.469481 0.534296764 1.06193 0.35448 0.25601 0.3363247  
0.7760813 0.8537721 0.4806978  
AC010542.5 3.145146 2.486375934 0.9406168 1.860908835 2.178431296 0.960529744  
1.485822 1.360234012 0.4178968 0.1484318 1.203468278 3.834135 1.149999  
2.261245 2.142808 2.307866 0.4614523 0.747147918 0.8654924 1.429923  
0.871822683 3.203288 6.617004578 3.269907 1.938728 2.110346645 1.095823  
0.4660172 1.022178 2.547766 0.6238258 1.025992058 2.473573 3.47986885  
0.8389529 3.845877381 2.897689076 3.390775319 1.71263 2.670078 1.652618547  
3.819001 0.643684657 1.503014 1.515244353 2.74862 4.118902 6.715176 0.46271688  
0.276732 1.871382 8.610307 2.721457401 2.152396 1.078843902 3.654267 1.509048  
3.257788 0.3221674 2.247356 0.3220829 3.146278 2.449295414 0.7522478  
0.3382847 2.339358 1.581137 2.321574 2.439841 0.7683208 0.599156 3.235703563  
0.4174297 0.1001963 1.45767192 0.9683011 0.458798747 2.560223  
0.6551496 7.918136 0.8077952 0.592376 2.266022 0.830035864 2.419700709  
1.285258 0.6156344 2.067245 1.921009573 0.5957045 0.501938 0.4955204  
2.843957092 1.10429 1.834272 1.881981195 2.101662 3.56434743 0.642880334  
0.3702824 0.182119393 0.792405 2.82595 0.086186794 3.560533 1.553557  
0.920288661 1.763679 5.056547592 2.169901564 0.2755769 5.898860724  
0.9237264 4.974673 15.04322 0.5776248 1.739079 2.730212856 1.715127  
3.293384 1.487237 0.8165804 0.8028367 1.567971 1.958063 3.031179 1.273137  
2.956505 5.612066 3.836795886 2.900836473 1.21172 3.123623624 2.26470825  
0.642593 2.736213836 1.304507 0.3255364 1.181573928 4.221164092 0.7764588  
2.869238706 0.6989804 1.616741 1.688224 4.123152 2.93928 1.136546 2.130037451  
1.966873 2.785294 2.499171356 3.136208 0.8532498 0.738799748 2.183519  
0.9396342 1.98007486 1.232535 3.161729 1.816351048 2.580494 2.40282  
0.1815795 3.243726632 2.11706 2.725339 0.482819246 0.3659086 1.907471989  
3.312105 1.292669 0.737754607 1.31501 5.381935027 4.021958 9.332241 0.8076721  
1.08724 1.481451 1.375017531 0.5588194 0.4285936 4.468749 2.32593  
6.650651 0.1798013 2.424835 1.90608 2.990335147 0.569722966 4.404596  
1.534836 6.198869 0.6476777 1.847508822 1.769825 3.614002546 2.036855  
2.429154 0.775780471 1.312122229 1.278427 0.8496687 1.166470513 3.96903  
1.100125 2.858424 2.114397 1.166064 1.136798 2.930968 0.2534306 0.5695863  
4.655145 3.531427 0.3704505 0.7680214 1.795249187 2.289827 1.245253  
0.65708851 1.396027 1.148384 2.393641 1.638952 0.6129321 3.15921461  
2.755353 0.5426448 2.254214 1.76114 1.242787 0.445553155 1.152436 5.349259  
0.7702798 1.506996332 0.913264904 2.746572 0.502489 3.072101 2.02680553  
2.605953 2.397791 2.150254063 0.9529772 1.742427 0.2127645 2.407787  
0.4237028 1.304905 3.045520404 1.495301 1.016214421 1.023601 7.187537  
2.998832 0.5754604 1.145643 0.2582498 0.8171569 2.846282694 3.919818

4.126254 0.514131947 1.742858 0.5542961 1.951482 1.636863 1.873362 0.6009266  
0.5876851 3.409412 2.740272812 0.5786915 0.930769583 2.168085 1.743096  
1.080813 3.770716395 1.799330447 4.220126 3.941543 3.453564 3.166761 1.016354  
0.743315519 0.5362915 12.03242 0.4138762 2.284599784 0.4595449  
0.2307028 1.09326365 0.5552516 1.26872474 0.3243399 1.854866  
2.856620155 1.407366 0.9744006 1.2113359 2.95024357 0.4784749  
0.4486825 1.931102 2.54867 2.037809 4.703717 2.226841 2.804478 0.8733134  
1.682827559 0.4788522 0.326748854 2.137031 0.520645204 2.302752 0.5345535  
1.260315311 1.910899 0.6195108 0.7599209 1.5968875 0.6796821  
1.045436 0.391123454 2.724258721 0.9093162 1.578464 0.898598 2.183776352  
1.220559317 5.751228307 0.344323 0.6184412 1.959762 0.5029176 0.7279511  
0.7405478 1.065484 0.7505499 2.532252 0.2390478 1.005375 1.017640829  
1.87464 2.380576 1.589245 0.7591628 11.9151 2.163576 1.240271 1.02286  
2.117606 1.892352 2.247921135 1.713862 1.285848 1.455753 0.644904 5.547186999  
1.022533 8.673825 2.321655 0.433372 3.389997 0.4727326 0.4854494 2.277164213  
0.7584532 0.2421384 0.459513196 0.9765597 1.982227 1.594374 0.6684708  
1.80129 0.229741146 2.123029543 2.959909 3.447299 2.904536 0.115623749  
1.950046779 4.866844641 1.063569 0.5479477 1.317847 0.4707241 2.054167  
0.3987737 1.038125 5.553214243 6.60707271 2.302868 2.260201028 15.52239  
1.513768985 3.041177 1.999913 0.6689178 2.293621 2.006209 1.201755 3.963283  
0.7113213 0.6066852 3.319775048 4.038549 1.639448 0.4920565 0.803901  
2.646894204 0.5995072 1.487093 2.308125 1.699171928 0.927868 0.9031134  
0.6674496 0.4266322 2.084419 0.6234115 3.036661 2.637853232 5.595926134  
3.019145614 0.4542636 0.888943497 0.357809147 1.835787 2.318826 3.905300056  
1.650166 0.8092601 0.7572094 3.156407403 0.4392755 0.4070356  
0.4328665 0.763263045 0.2724592 0.9830147 0.2240463 3.220492  
0.7762174 5.390888 0.8334081 0.8967043 4.080227 1.358881 2.438778  
0.265210353 1.281627 2.202984 1.333883 1.600283 0.8803337 0.3622924  
0.3516815 0.353954926 0.43708991 0.874166918 0.5065548 2.575646  
0.4778252 2.779057 2.470941 4.735427872 0.994136 4.472253 0.2694166  
0.5934348 0.7953095 0.186325259 1.517466 3.284693 0.7284356 1.670615  
2.761303 4.90911 2.521799 1.238917801 0.4400654 1.854512 0.844064498  
0.2940781 1.525261 1.847625 2.62177 1.621769 1.8375447 4.676204311  
1.402827167 0.2710925 4.024994 0.5741222 0.7330063 3.238072 1.089271  
1.792923671 0.7422285 0.83033298 0.7408443 1.41913 1.853685 1.891329  
0.5686868 2.344155186 1.319419 0.815384 1.713028 1.254777 0.8090374  
3.870143 1.623787 1.437426249 1.280606 1.314606887 0.3129193 0.4121974  
2.27148575 4.610751 1.693464 0.870819 1.368588947 0.3048449 2.861029 1.91073  
1.260213048 0.9633499 0.9344538 0.8879929 0.7515175 1.682077  
2.132195 1.16815  
AL021707.3 1.109894 0.956305843 0.3718982 1.785300975 0.725510684 0.361017153  
0.3263664 0.862729068 0.1211663 0.1434559 0.511373618 1.335107  
0.5377972 1.189137 0.8960947 1.398633 0.6355258 0.210612854 0.4779877  
0.6687038 0.252778949 0.9348022 1.993303531 1.743608 0.7853156

0.695318629 0.589331 0.1447698 0.3865741 1.56801 0.8074731 0.68420237  
0.8964943 1.241801688 0.85137 1.974630591 1.254412839 1.072032037  
1.365554 2.029076 1.25363015 2.231534 0.217737226 0.760096 0.396621519  
1.052567 1.561708 0.2000362 0.391304535 0.2808279 1.069537 3.135005  
1.900935882 0.5047644 0.391004147 1.765883 0.72923 1.472062 0.3269358  
0.5430044 0.7937784 1.501157 0.863703537 0.7400129 0.09195311  
0.7536451 0.4145465 0.7534975 1.288934 0.1485129 0.5308146  
2.451074351 0.3025771 0.03631404 1.362463947 0.487417 0.190036456  
1.030998 0.3352166 0.8634679 0.4258447 0.1431294 1.642543 0.066850875  
1.484101938 0.310543 0.6824959 0.4806376 0.756770952 0.7196682  
0.5717386 0.6927076 2.447988683 1.133975 1.471031 0.151574281 0.859357  
2.049097462 0.27959805 0.6518336 0.528042567 0.3829205 0.9310962  
0.18741948 1.789019 0.511867 0.549358607 0.6146233 2.534500317 0.867790248  
0.6277985 2.382250666 0.4686991 0.5957624 1.578888 0.4567591  
0.7503481 1.094774682 0.5525436 0.9855557 0.3155225 0.3946031  
0.714202 1.111299 0.9083631 0.5950679 0.4614214 0.7937206 2.609628  
1.365282483 1.469624566 0.5855498 1.409774065 1.231193384 0.2739932  
1.528844337 0.6654094 0.2022579 0.308330259 2.19784373 0.328312908  
1.544986654 0.7093259 1.017709 1.359691 1.25612 1.507781 2.141969 1.36679667  
0.7413657 1.325872 1.36970367 1.973057 0.6872052 0.817379768 0.9925661  
1.036458 0.770146208 0.7445104 0.3819672 0.617994048 1.198283 1.345861  
0.3422102 1.055043669 0.9708488 1.272345 0.17498762 0.08841054  
0.499288736 1.200402 0.429459 0.367652379 0.3364218 2.007381156 0.6832844  
2.788439 0.2634513 0.4784858 0.09204353 0.598015215 0.4050645  
0.3365585 1.602907 2.385028 0.6307557 0.417057 1.506566 0.9318017  
1.160106502 0.337882966 1.596353 0.7754048 3.302766 0.5868427 0.986764924  
1.15016 1.366767401 0.799733 1.106783 0.120499379 1.290781125 0.5148209  
0.1368642 1.796740871 0.4057282 0.2362768 2.390712 0.939358 0.6808801  
2.044782 1.075714 0.09185054 0.3440575 2.576092 2.799762 0.4177039  
0.2783531 0.925369009 1.528068 1.662742 0.622848166 0.4427153 0.6035007  
0.8859824 0.3449053 0.6272309 0.870837841 1.557169 0.5244537  
1.089323 0.08235972 0.7206749 0.129185051 0.119336 0.6924021 0.2791716  
1.299020173 0.472847917 2.14746 0.364233 1.017982 1.708308796 1.784004  
1.067664 1.138997518 1.450623 1.840389 0.3392928 0.5907178 0.5221112  
0.7094031 2.897434142 0.4269831 0.086660098 0.6416997 3.118071  
2.386837 0.4171269 0.8823303 0.9593712 0.4343698 1.822002495  
1.403539 1.875678 0.229336919 1.291398 0.2363446 1.151375 0.5741095  
0.8576343 0.3563888 1.029471 2.15887 0.973680298 0.4544247 0.95579027  
1.227776 1.12616 0.5109363 1.382324613 0.355706864 0 1.150759 1.560525  
0.08828657 0.4714959 0.331567979 0.2286676 1.267269 0.3900017  
1.288007553 0.3608634 0.2341174 0.613517851 0.3405586 0.710634678  
0.313467 1.100057 1.017158001 0.9634657 1.120341 0 1.069253362 0.2312175  
0.3794361 1.710835 1.285164 0.8479771 2.875861 1.146891 0.5569444  
0.07912849 1.549488999 0.1041299 0.562510242 0.7565095 0.471742096

1.210965 0.2906064 0.276833103 1.133288 0.4169816 0.3147626 0.655925833  
0.2815273 0.2210228 0.311859725 1.21519992 0.6591248 0.5593679  
0.5747256 1.032343742 1.263902573 2.103891495 0.3494192 0.07471364 0  
0.257325 0.3165966 0.7935183 0.6319016 0.4835928 1.783079 0.5940878  
0.2699088 0.639292139 0.9486291 0.2156973 1.130241 0.3668567  
5.246624 1.845041 0.4782022 0.4847796 1.111525 0.8573038 1.336126786  
2.706452 0.6524397 1.812803 0.4877881 1.281001421 0.1389733 2.227497  
2.252075 0.4283632 1.618199 0.2492101 0.4838373 0.793567298 0.2868369  
0.501474 0.43556834 0.7078668 1.512455 1.120673 0.5985571 0.4835848  
0.57095875 0.473505932 0.7049541 1.330007 1.931537 0.712391484 1.630968916  
0.653290692 0.5550741 0.6721577 0.2228921 0.4094495 2.076734  
0.4496398 0.5234734 2.30508061 1.183844084 0.2921191 1.287254638  
1.956786 0.329180125 1.899193 1.491071 0.6464936 2.185064 1.105204 0.807362  
1.72369 0.7734101 0.1599129 1.627834779 1.897372 0.1440444 0.3863935  
0.660409 1.61338635 0.5925783 0.2487533 0.8682982 0.348077213  
0.4035433 0.4091429 0.3518589 0.2748868 1.17515 0.4724248  
0.3884377 1.387186724 0.853947382 1.400608576 0.269408 0.847838849  
0.551141509 1.733922 0.08846414 1.743966842 0.6265471 0.2805471  
0.3293214 1.143973081 0.2605191 0.1264469 0.18826 0.434701994  
0.3159906 0.6815655 0.6225398 0.2513968 0.3375883 0.9769067  
0.3939798 0.5249863 1.428945 0.9252987 1.602775 0.224279723 0.9038893  
0.9926365 0.3927931 1.228211 0.8167893 0.604004 0.1529514 0.396512556  
0.374433068 0.200098929 0.1223934 1.145645 0.372998 0.8166571 1.156267  
1.734710004 0.6176632 0.9895859 0.6509624 0.3226168 0.3458917  
0.225098827 0.6324694 1.337237 0.7116685 1.645661 1.363376 3.294821 1.21863  
1.171355333 0.2899862 1.955283 0.515222432 0.3197471 0.398015 1.195772  
1.32307 0.6171647 0.832473998 1.534232139 0.231102285 0 1.530517  
0.6609551 0.6578312 1.03132 0.3421455 0.478805343 0.3362563  
0.085981892 0.2506031 1.028667 1.067022 0.9620664 0.09699223 0.849589451  
0.2812914 0.7552144 0.5228217 1.525672 0.2932185 1.577983 1.517041  
1.302411829 2.45539 0.762322324 0.5103495 0.0426835 1.487164815  
3.768794 0.2104321 0.676307 1.512849129 0.1964171 1.215698 1.83594  
0.619858112 0.6144966 0.178249 0.2059739 0.3328987 1.434431 1.574159  
0.3486586  
MIR210HG 0.7151625 9.027856141 7.705351 25.556050578 25.979284144 8.694842706  
10.93032 6.667219831 10.83961 5.390782 6.406601488 9.081999 17.10161 9.880624  
2.231331 19.24722 10.07827 9.653048092 5.365481 4.183029 15.224105004 5.285801  
22.389265546 16.04628 22.18572 6.178260019 9.256294 6.311239 3.986424 12.75372  
0.2053438 7.247561923 7.141408 12.318133705 12.61346 15.323167414 22.07714059  
11.648188369 11.36648 25.15512 13.081059583 17.66988 6.052725004 6.109521  
6.435526898 34.29548 17.60471 47.59982 12.635533392 10.63037 9.263692 36.88432  
23.160965823 16.41013 9.66898688 18.62625 8.85837 23.63372 2.317135 3.246719  
8.95865 29.51618 19.676389626 8.940716 4.085251 7.477971 3.831475 11.32026  
9.310732 5.44593 8.502514 12.79549191 5.365653 4.188647 9.684780301 5.343225



0.868376949 9.310321 17.82956 1.268602 4.931249 6.499717 7.765381 2.367920782  
22.168948298 9.748153 9.26814 4.018636 9.780584735 8.183369 8.762676 5.831171  
17.559957007 12.24279 10.4763 13.374076067 8.851502 11.489961936 6.856356152  
9.672469 2.360450944 3.051766 15.27242 6.354874258 22.91423 6.462007 2.708550615  
11.70027 18.813664818 3.127980047 4.801216 12.447805165 14.58736 29.83108  
27.06659 11.03652 10.05195 9.37898582 24.34951 15.48541 5.599992 14.16281  
7.615739 18.3569 17.76332 0.6963594 5.41307 17.73966 34.10562 20.41390011  
8.706715808 5.537507 12.639080134 10.020844256 15.40995 12.243554856 10.25  
0.3827011 1.656871077 23.806975102 0.814679574 8.479927535 0.4218176  
7.702607 13.10241 28.01954 31.58575 19.20708 13.930870091 4.286005 8.299374  
6.78183308 24.88331 9.377701 7.276488127 23.26178 9.433588 7.535191827  
17.09624 25.57526 5.771425152 9.947474 13.0414 14.29704 9.97234783 21.6954  
13.21316 4.330811664 7.688441 4.290510742 14.67931 4.423489 15.898794553  
14.72997 17.973627397 32.14599 17.32329 4.459805 14.32819 5.851763 16.859812115  
6.048984 8.982062 20.29789 20.9986 0.4296531 7.125862 22.31644 21.76277  
14.244970862 0.375069665 16.16587 9.660409 55.61594 15.78532 11.99212632  
11.42039 10.158283281 20.30262 11.55995 5.97365765 7.527561316 7.153903  
5.733525 15.598590496 8.56749 14.27717 1.889044 14.14437 8.332343 15.84798  
8.713572 6.162752 6.968372 11.09701 28.52505 10.83239 16.11654 10.807625274  
10.27119 18.74744 5.19102754 12.62984 2.646082 13.88064 18.52544 14.27141  
21.523286614 16.44854 6.823344 36.92413 0.2431049 11.59759 10.149013635  
9.158488 21.98913 3.587758 25.298838894 9.297685401 14.78535 4.938477 3.062609  
12.412287604 9.523142 22.39292 8.282572269 16.42167 10.61891 6.093078 3.847  
5.202216 8.23273 21.193249663 9.165468 5.912880838 10.70459 25.52315 14.14873  
6.975518 22.81514 12.79366 14.44435 1.666963507 16.74256 16.67864 5.721479366  
8.732898 4.985364 13.31043 8.138544 5.298337 5.187914 10.24465 18.85286  
17.925265498 16.08821 6.331853166 29.5279 20.80548 14.72577 10.664341203  
11.809760781 0.1792429 9.496479 13.00681 7.918213 3.298681 5.015858534  
5.737233 8.090649 3.160652 9.943351714 7.3743 2.422489 6.924555183 4.653639  
7.726047167 5.498267 19.12174 7.398749198 13.48603 9.279396 16.64712671  
17.097440288 4.108095 10.51076 26.63407 11.72695 8.030756 21.81105 11.47251  
3.287916 7.752632 14.873869991 6.462545 9.00776622 0.5807496 10.261376355  
31.36012 12.27308 12.257110639 21.65073 3.685187 6.593028 5.606880024 2.173376  
3.685001 3.308759494 14.301854179 0.1768699 9.883576 7.081563 19.619379242  
14.727726835 17.701584459 7.525794 6.514283 0.6562142 2.327363 10.99849  
7.493124 10.27461 4.728403 6.442054 5.041588 5.503371 8.195728188 8.324655  
12.50278 9.742053 11.84213 14.31374 10.8084 4.803548 6.1058 12.69711 6.57941  
21.857967691 22.59619 7.280082 18.73747 7.125293 9.654960263 31.52334 25.264  
20.44277 4.655655 19.28295 11.3948 7.390501 12.274219252 6.545405 8.887033  
7.469781219 11.22406 23.30064 6.989616 7.164228 13.47264 8.918176006 9.891194148  
7.25164 15.96875 4.841808 4.42443914 23.865285978 28.865878645 11.95919  
11.71692 11.34371 29.56399 13.13188 8.663405 7.681228 15.021941759 15.34606175  
5.827368 18.794526105 9.182254 8.146959886 11.774 8.680266 13.74943 18.23835  
11.2793 4.057104 8.392849 8.419447 1.606691 10.582145805 20.11277 2.63286

8.415665 9.341045 24.702600732 9.530571 0.329474 9.506644 11.417297123 7.171376  
9.655291 8.578417 12.0383 8.405033 6.63193 27.52746 19.017430735 23.385120674  
25.48122476 5.797657 9.340488278 6.735514393 10.12632 0.6728953 6.725928079  
13.42868 6.868046 7.751658 15.769183441 12.5601 0.1148428 7.010312 4.010901028  
4.807114 10.27007 4.615457 6.23819 9.121574 5.52422 4.991644 3.422799 43.80862  
1.091143 10.24333 10.970559756 0.2394404 1.891277 19.14081 15.02048 5.673855  
13.44603 8.867405 19.483783089 5.617712148 9.457828326 6.516828 12.10072  
10.88291 27.38153 10.07429 7.165237904 12.06886 36.81086 3.345337 5.249763  
23.49572 3.526612945 0.9677849 47.99568 14.20424 20.32566 1.132874 14.9084  
46.21794 8.413352627 4.148139 5.845492 6.22945209 8.465268 8.324284 10.91465  
16.42439 9.208658 15.832256634 9.843156113 7.272821759 0.9146598 9.692412  
9.971629 6.974215 9.318297 5.199028 11.283193631 7.131038 10.181148765 1.154283  
44.18576 0.4935235 15.17095 4.498156 11.144676218 15.13702 6.016604 5.015518  
10.79216 21.99274 10.6592 11.39078 17.45351935 11.29986 5.695770808 6.328258  
7.704822 8.411641543 31.4199 9.779002 8.322976 9.178862494 8.183719 18.01523  
22.89093 9.814994061 7.31877 3.318764 0.5086007 4.308463 10.41419 8.435214  
3.980893

C1RL-AS1 0.1997464 3.034450108 2.878427 8.467442363 4.15567377 4.981855602  
2.68125 2.296845753 2.258069 1.181657 1.056145118 2.738005 0.8999277  
8.829896 6.772882 6.199365 1.97275 5.110183343 2.764322 1.830272 5.77922301  
2.054908 10.041013038 4.509403 4.850412 3.543668078 5.284794 4.315045 1.345572  
8.000353 0.206694 5.546431577 4.382456 3.631095687 6.692005 8.289041691  
5.262529027 4.904464833 7.061309 8.660192 3.348728052 8.974779 2.418257277  
0.2147244 3.184552086 1.742467 4.806339 0.6804206 2.663646604 1.439788  
3.5553 2.98719 9.370235143 2.785744 4.537150663 12.45288 2.154643 6.126394  
2.928266 2.10138 2.584274 5.829318 12.988072251 3.856553 3.143678 9.851065  
2.973388 5.367122 9.715608 0.3467656 4.252384 3.237951796 2.810273 2.575115  
5.278027257 3.539006 0.466316688 10.41379 0.9832113 0.6369032 1.624966  
1.980419 9.892397 2.118796468 9.221243952 2.56468 2.497052 1.105135 3.570647523  
2.788165 3.303698 5.0364 7.732562528 4.401364 5.252412 2.073672472 1.834252  
4.329913899 2.329264952 2.745531 2.454457786 2.026601 0.7472238 0.977867952  
6.581587 3.101536 2.694365848 6.87783 11.107357582 1.35550396 3.380853  
5.887231155 2.976236 8.316516 1.915824 1.793951 1.772767 3.364585227 1.779922  
10.69913 0.7571841 0.4777456 3.124756 6.03486 4.151082 0.1504232  
5.455631 5.836668 7.61327 10.643574226 5.738644442 2.663531 4.906161241  
1.668057594 6.134512 6.0174404 4.509602 0.7929236 0.343668552 9.059823943  
0.949104299 2.857158551 0.4556793 2.768312 11.194 3.228854 7.134635  
10.07105 4.771718454 4.3473 10.65551 3.947057131 7.515006 3.409214 4.180210727  
2.985688 3.615985 1.574207618 3.408068 2.837078 4.145333461 7.294243 5.09369  
2.843284 4.770475245 5.17016 4.760267 0.832296714 1.592199 4.82926445  
9.191546 2.576094 3.089801401 3.396638 12.767444349 6.562864 8.283607 1.260652  
2.726128 1.223154 5.467473439 2.877798 1.323162 5.28766 10.03531 0.1051974  
1.902506 5.931095 5.704566 6.167302747 0.259729896 3.202764 4.868838 1.567579  
4.063326 6.645889596 4.468235 4.991811042 7.15537 3.989489 0.953485447

4.185930747 1.032886 1.642219 5.359068096 2.296588 4.316442 2.723524 4.251973  
8.665732 8.303078 2.165183 0.7228219 4.042519 5.268195 8.726667 1.713234  
0.6258605 7.024653017 19.65316 4.71225 1.882035794 1.493129 1.243558  
4.418329 3.324042 3.957405 6.437503793 10.7583 3.292698 5.70601 0.06410111  
3.400492 1.114380059 2.07432 9.460708 2.921224 8.501892663 0.785110661  
7.192359 2.618861 2.354898 5.398126844 6.885033 5.984269 1.783346709 3.291509  
6.793693 1.965883 1.834394 4.039722 1.629133 10.127033141 3.80042 2.480591977  
2.949812 11.20226 6.243905 2.916463 3.572757 3.779966 4.217374 1.823572156  
7.513467 4.910015 2.632792719 2.063619 2.276874 4.878892 4.086041 1.875805  
1.236223 4.509684 8.99825 8.797468315 1.813753 3.670868277 4.620789 6.228122  
0.5272744 6.90079691 2.303656908 0.6912094 4.437039 7.641649 0.7482192  
1.427099 2.068076378 3.644502 8.992954 2.469837 2.537986001 0.8617912  
4.026086 5.144231575 2.120472 2.646163788 1.64908 8.297562 7.523918303  
2.323132 2.392648 2.35389558 7.098653516 3.94908 1.858626 6.598592 8.470878  
4.411735 8.648098 6.288838 2.360022 1.265939 6.631450237 2.572428 3.005751659  
0.2990711 9.880682332 2.335027 2.560591 2.733960839 2.368455 0.9569756  
1.207896 1.004339342 2.644591 1.195973 0.755136545 6.948988335 0.1943186  
2.860621 2.955577 2.642556038 6.542722124 7.77630969 2.037506 3.705455  
0.3897213 0.8993952 2.123378 3.039563 3.190714 2.373307 3.328862 1.29938  
1.871973 4.558888417 3.651712 5.337474 3.937858 3.272985 14.3585 2.497058 2.92457  
3.553592 8.543505 2.843947 10.241342778 7.493434 1.736992 4.773248 1.669751  
2.600231319 2.031076 8.398072 12.1027 1.484238 7.548955 2.548443 3.988259  
2.552906258 1.24853 3.198296 4.194364441 4.856411 8.331633 5.284849 1.838795  
5.505562 2.756807584 1.177257426 5.849834 6.657045 1.059011 4.707465158  
5.695033235 6.105291325 2.541438 5.67797 1.941305 0.932426 4.852395 1.388721  
3.327286 11.701550914 4.388253272 3.579989 6.476791542 9.511572 4.920047284  
6.707418 8.757555 4.516884 8.581298 6.698731 1.822655 4.259312 2.441242 0.7744255  
4.608776296 6.366376 2.058477 2.285054 2.042564 5.773245294 3.035429 2.688976  
3.521863 5.26076295 3.438599 2.681961 4.065972 0.2555468 8.959958 4.460256  
3.829433 5.132421077 14.751156295 9.5421846 1.568732 4.185096174 2.699906051  
14.28681 1.357919 4.666541983 10.55581 2.386429 0.8662431 3.784835128  
1.932513 0.6925463 1.145058 3.461916258 0.5021225 5.312706 4.838246  
0.714328 3.561684 3.487876 4.483715 0.6810004 8.690346 1.471307 3.136971  
1.961703623 0.1433062 3.355292 1.774183 5.470014 2.43469 2.747929 3.315571  
3.89290224 3.554372843 4.375092703 2.362966 5.731594 3.057437 2.985011  
5.934834 10.287207406 1.537153 7.26822 3.908697 1.706515 4.284922 2.248347218  
0.6848766 10.54601 4.663449 6.63507 0.8253189 8.908088 7.686102 9.893345826  
4.042504 1.180107 1.673622161 3.360549 8.04657 4.384524 10.50349 3.057423  
7.112721227 6.084679344 3.553400516 0.1557722 3.490911 4.790721 2.848789  
5.185146 2.016552 3.762064427 2.846828 1.691595659 0.6594414 5.23579  
0.2392301 2.845374 0.2054997 4.358179438 4.125632 5.389479 2.622345  
3.864255 1.718648 2.570027 9.169828 7.086718977 5.872971 5.249237812 3.008485  
0.756697 7.241077754 15.68411 5.007442 3.38829 12.465208744 2.751708 6.236789  
9.932832 2.135712222 5.253687 0.7645693 1.057606 4.797224 8.18403 5.435337

1.06607

EBLN3P 22.39232 15.356175608 8.648707 10.745794099 4.756274811 10.078568549  
7.176412 10.547177005 17.20716 8.495374 9.543826642 11.6083 16.96449 9.517524  
9.646856 9.960502 9.271896 5.131294145 9.446717 9.205631 13.415458985 7.812224  
7.083954544 13.20812 8.584522 10.000647468 14.85516 5.550699 12.69809 11.17424  
18.43409 11.447735464 6.743017 11.356365507 12.0248 16.055455429 11.257082793  
11.994124466 14.24399 13.17511 14.359828775 19.77264 11.082575802 21.52894  
12.256606853 19.07741 6.597692 2.970315 11.898823226 13.25023 9.847787 11.90982  
7.676743883 12.39168 8.4142351 16.1165 9.551291 13.26267 7.794494 8.055654  
17.94578 15.37791 4.481741622 10.77096 8.152542 11.11319 12.74192 14.97598  
11.71551 9.392436 20.26073 10.860661338 9.117867 12.3244 8.455732601 14.51588  
9.091132415 9.374677 12.53482 6.445176 10.56243 13.17461 13.98877 9.999067786  
10.598211967 4.619632 6.896562 12.61068 9.141508278 13.06221 7.427767 13.04929  
10.130459316 23.97591 12.14421 2.814208116 15.07953 3.94698863 5.818468634  
10.6816 7.29177059 5.226295 10.18463 4.08304452 20.89164 12.71029 9.614035886  
18.92377 19.179652744 7.790510653 9.749707 9.883701611 10.86404 4.282165  
11.71167 7.849843 12.14053 13.57496444 10.81353 9.099324 11.09733 12.38634  
12.73387 12.24887 5.962613 19.44214 6.830756 13.97529 13.4394 10.136462542  
13.363548207 7.606331 3.566486743 10.141756889 12.58635 16.401473359 7.233935  
10.6431 10.020038521 8.982128182 9.93761668 10.977156849 21.11208 12.71019  
11.85088 5.855444 10.42084 14.86714 11.318435249 12.98021 7.331458 12.200989859  
16.87221 11.59893 8.54154401 11.49001 12.74871 6.610499917 15.47318 17.05676  
9.490319444 14.97468 5.589279 12.21857 15.493879247 17.62713 9.776699 8.257415588  
19.21045 13.727753599 5.135504 8.07385 9.055545198 9.252595 9.547514646  
8.794446 9.816109 8.142775 12.76014 5.821132 4.896346298 12.35795 6.317751  
14.81614 15.22609 22.77291 4.964578 15.6934 15.02116 15.607396105 12.854250084  
10.8312 13.51083 12.23458 17.27845 16.010263241 10.98218 9.551229772 12.94948  
4.96879 8.358687979 12.558103526 7.159062 8.102237 9.384827745 3.154226  
17.47581 16.8972 15.36644 8.928273 18.49997 7.566116 15.05244 6.852226 14.78253  
14.64062 9.667459 11.9195 12.830190288 15.85895 8.468957 5.947657165 4.200327  
10.35637 13.94208 18.39863 11.98839 9.244649068 7.911348 12.41461 10.95497  
5.754338 12.25856 6.573871176 8.86327 6.037509 7.985923 13.463583672  
14.075842996 17.01291 12.12461 11.72741 16.166967509 10.23108 10.79424  
10.077534757 12.0335 15.53831 8.866023 6.404011 15.87087 10.58511 16.302113343  
11.81182 14.205351866 16.90585 16.02293 14.81865 14.25325 6.434084 15.11423 10.105  
19.609291317 12.96764 12.11542 7.96974977 13.9574 9.2469 10.86501 13.37847  
3.57298 8.192263 16.50042 18.3945 10.264173336 10.20396 9.668549102 18.79534  
20.53065 10.12039 12.712964968 4.918804038 44.86378 7.061011 14.67546 1.09087  
9.864586 8.651914291 13.77206 27.15979 7.862358 8.974416345 9.163619 8.841395  
8.395216895 11.87637 8.396626099 3.297742 15.2069 8.504670055 12.73846 12.9144  
4.0684294 11.336256397 6.667724 10.37686 11.55064 12.55603 14.83365 8.671453  
14.9013 14.09372 9.072784 9.998859868 10.27611 13.518106098 9.608065 5.851857741  
17.1044 9.740657 5.108324423 7.922701 6.893974 6.105674 4.312639002 9.520252  
10.52087 6.310076785 20.287563975 11.16898 9.604663 21.5718 11.835338773

10.697501376 9.422174471 10.98022 10.88664 29.26314 9.034757 12.25033 10.82162  
6.523607 11.88667 13.9361 9.451365 9.432331 12.432286063 9.833028 8.589122 13.3398  
12.57975 24.80892 12.29857 6.571063 13.05547 16.6512 11.04444 20.668280813  
14.23548 5.796134 14.37988 12.88857 7.812792472 3.061507 9.439116 15.47043  
6.790181 11.66832 16.87505 13.31888 12.610162603 9.441374 12.25383 9.557846135  
11.78975 18.3621 9.724816 13.09785 14.8947 11.359573527 4.072836662 10.7784  
16.87259 18.65794 7.834877807 12.486154838 5.307028724 9.006794 11.98093  
13.52179 6.021623 12.81733 12.25764 9.329724 14.285544457 5.46347373 6.872835  
11.732399508 17.55031 5.146627749 16.05599 10.03 13.11201 16.58457 14.98935  
9.849693 10.04178 5.326498 11.9398 12.83849073 11.3474 40.07801 7.0382  
9.341074 14.947716378 14.58118 8.209741 11.34846 5.994193661 6.184619 5.920108  
6.864586 12.39333 16.43071 14.54312 4.613593 13.357933094 8.786206107  
17.152938405 9.762557 9.309770141 7.221033439 12.78381 31.66648 8.95798262  
15.98947 9.033066 6.712674 14.038947764 12.16293 7.452139 8.547041 6.193563161  
5.84052 7.902645 10.96389 7.181768 15.20308 12.32781 10.45129 6.336353 12.25605  
17.58139 11.07264 9.412710745 17.18335 12.01944 8.449161 17.51372 7.253808  
12.74445 6.133786 11.167550159 10.123976362 11.012046236 10.29753 13.43816  
11.61504 13.68872 16.48737 9.555932105 6.97076 14.02482 8.741793 10.5732  
6.216283 10.329320944 13.8346 9.703766 16.38495 7.814481 15.15516 13.22459  
18.95054 12.797422896 9.638933 9.245246 7.941909807 11.53356 11.43909 12.89311  
12.91599 15.48073 15.096139729 16.877401079 4.14799192 18.19668 14.45352  
8.250344 13.13012 10.4274 6.835541 11.910089028 7.590683 1.666978401 11.25666  
12.05022 23.30354 16.30202 9.565812 10.098853796 6.846094 12.68659 10.67811  
12.08729 4.687667 8.483865 7.613918 12.260028646 8.081264 14.208288673 18.28383  
6.606349 12.810120365 9.751607 13.38253 6.736475 14.029662212 19.59906 18.16319  
21.10868 6.619388373 7.849297 11.0586 4.920503 9.417288 5.008151 9.622791 7.98038  
AC004832.5 0.1182681 0.580057371 0.2851065 0.469253673 0.280434304  
0.508343533 0.471807 0.080986501 0.1592385 0.2356647 1.304576586  
1.754617 0.2120342 0.5913226 0.2355321 0.756866 0.9231348 0.593122412  
0.3140892 1.31823 0.581360064 0.3566702 1.309814165 0.966716 0.8147946  
0.791958093 0.5051135 0.1902585 0.2116839 0.9158676 0.04244771  
0.273666111 0.3272738 0.968996283 0.6793217 0.946443889 0.498404127  
0.58416976 0.4894448 1.271783 0.4393437 1.00232 0.327032471 0.4661669  
0.481149911 0.4940351 0.8451138 1.051562 0.367327199 0.316344 0.9599224  
3.212897 0.329955887 0.8442873 1.214585994 0.9493971 0.5590461  
0.9673024 0.2762124 0.2973434 0.3681865 1.821085 1.576516223  
0.5118608 0.6042305 0.792361 0.1602362 0.6931801 0.6696955  
0.2439722 0.5073485 0.944155779 0.07953024 0.09544888 0.730844827  
0.4355879 0.374622989 0.3484165 0.2936977 0.8677745 0.9094334  
0.1881028 0.4240213 0.175712774 1.182077717 0.2550751 0.1724896 0  
0.875212211 0.1891597 0.6489252 0.3034555 0.76196419 0.8181964  
0.6692021 0.438242449 0.7700314 1.287934294 0.20413989 0.6550846  
0.260235442 0.05032397 0.6852497 0.246309391 0.7708704 0.7623968  
0.721975027 0.8723666 1.588572096 0.213836718 0.1500112 1.003457783

0.3079856 2.30767 1.621091 0.5002328 0.7494499 0.553372585 0.6656474  
0.6044414 1.105771 0.03704236 0.278108 0.4315069 0.5222805 0.9023617  
0.5053389 1.356055 1.10958 0.863909697 0.445708122 1.077353 0.954444634  
2.074425838 0.3240773 1.357587393 0.9665424 0.1772069 0.360188521  
0.736268515 0.215736786 0.234281978 0.3107354 0.7295387 1.107894  
0.3984715 1.292314 1.082695 0.532226356 0.187368 0.7920367 0.348403427  
0.8455499 0.421463 0.296334431 0.4230632 0.817277 1.196162247 0.4566083  
1.282855 0.60030453 0.4609175 0.8323531 0.4497376 0.356542367  
0.9877963 1.232099 0.076657087 0.5809521 0.454273254 0.5859606  
0.1026184 0.52709899 0.5895072 0.447984229 0.8979823 1.051878  
1.000224 0.6658231 0.6451463 0.305635651 0.5323417 0.1701193  
0.7899612 1.513177 0.05921059 0.1027692 0.2828501 0.7178615  
0.561705327 0.246694823 1.818223 0.8861289 0.5551857 0.5141581  
0.648410368 1.27901 0.808301469 0.4446626 0.6611592 0.501479752  
0.624975924 0.5863737 0.5396067 0.463000557 0.5816879 0.4657776  
0.5027054 0.4873097 0.4319833 1.283478 0.4594586 0.4828452  
0.6028871 1.287458 1.314103 0.4313198 0.2032309 0.608066668 0.6232375  
0.4370398 0.240751785 1.080528 0.4375886 0.8732781 0.906559 0.9273554  
0.339101537 1.290156 0.5513957 0.511287 0.1082383 1.598267 0.424442158  
0.5750549 0.5459789 0.4402696 0.737196157 0.124284714 0.9113428  
0.4444888 0.5853081 0.673525238 0.5976339 0.6526228 0.433309398  
0.8624324 0.6165225 0 0.4940281 0.282539 0.1553846 1.087957102  
0.4316518 0.284724885 0.3953114 0.829937 0.2800728 0.1644583  
1.159571 0.5842822 0.4670632 0.528198978 0.7198248 0.9327193  
0.715820002 0.7010067 0.1863645 0.3458638 0.5784523 0.7514103  
1.613279 0.2799198 1.306614 1.023699784 0.918787 0.184722558 0.6454243  
1.22733 0.134296 1.156063364 0.571358463 6.354462 1.303745 1.025432 1.044247  
0.464735 0 0.721244 14.79324 0.2759863 0.544087978 0.03648091 0.1318631  
0.503933771 0.1220637 0.164810536 1.235889 1.204759 0.620640315 0.8937886  
0.224056 5.19273418 0.702614117 0.07596734 0.2849488 0.3679208  
0.3694645 0.5392373 0.7013501 0.8652795 0.5123611 0.3639713  
0.303287787 0.1824654 0.544717228 0.236718 0.578638934 0.2150632  
0.3394837 0.582108908 0.9101786 0.0843082 0.4136655 1.622639468  
0.4162357 0.456455 0.409850562 0.731973601 0.2362449 0.5012246  
0.4783647 0.452240359 0.764077959 0.81924878 0.4592118 0.6873283  
0.06437606 0.3381802 0.3236145 0.3067215 0.2306817 0.2383292  
1.72305 0.1951897 0.2483026 0.064628229 0.3706412 0.3239686  
0.3713449 0.1205321 18.98829 2.667258 0.7290139 0.1873836 1.356441  
0.7210759 0.813736239 0.6414006 0.4287229 0.7467259 0.1602645  
0.935283664 0.6088023 0.6138114 0.9432043 0.5629611 0.6695043  
0.4093943 0.346836 0.959484211 0.2513101 0.2636177 0.37039602  
0.2584136 0.8944607 0.7824275 0.9364671 1.048631 0.812892435  
0.700074388 0.2416855 0.8474736 0.5838444 0.165217975 1.143169568  
0.744088867 0.7700134 0.401527 0.585856 1.300419 1.08141 0.2532528

0.644959 0.904289635 1.343667061 0.3290632 0.358851535 12.85818 0.288408854  
2.317665 1.034227 0.7080261 1.498249 0.9173526 0.5305234 0.7550994  
1.016427 0.1576199 0.325549306 0.7124438 0.8991998 0.2343711  
0.6637028 1.088821023 0.8306933 0.3269152 0.3339893 0.492636424  
0.1767808 0.6093951 0.231209 0.2257876 0.6986569 0.3509251  
0.8508175 0.443447235 0.721459286 1.66813442 0.3540599 0.222848416  
0.511283395 0.5829349 0.1162608 0.498249228 0.2994245 0.1340724  
0.3245992 0.921454627 0.342378 0 0.08247133 0.830969671 0.3114596  
0.6921498 0.5335766 0.1415954 0.3450715 0.7336371 0.138073  
0.197127 1.484883 0.313817 0.4026923 0.210536897 0.2639788 0.5104711  
0.2779616 0.9415774 0.4025386 0.3451265 0.5025275 0.429143266  
0.416379914 0.306801724 0.2814895 0.9479848 0.2801139 0.7870592  
0.8044851 0.630577717 0.2254839 1.928369 0.4277521 0.4239877  
0.3788132 0.354993761 0.3613915 0.728685 1.26716 0.3672598 0.5337182  
1.489555 1.334618 0.923647273 0.381104 0.5888808 0.423195483 0.3081586  
0.348718 0.6914605 0.4426032 1.042826 1.312859243 0.890927704 0.728923117  
0.08608258 0.7857139 0.4504042 0.09975362 0.6075819 0.2421206  
0.494412998 0.1767651 0.677991874 0.5645935 0.3862541 0.2077475  
0.3476994 0.6692101 0.152255829 1.256903 0.4746805 0.8159311  
0.5398238 2.098028 0.9216924 0.7906119 0.92429017 1.456044 0.65746736  
0.3726159 0 0.279207644 2.803587 0.322645 0.6517958 0.749652275  
0.1936006 1.12778 1.227574 0.900376654 0.2202492 0.4685147 1.048939  
0.4375002 0.8483175 0.488985 0.09818832  
AC026401.3 1.308413 3.450365826 4.129426 2.394210507 3.212975888 2.203321483  
4.933647 3.313835413 1.085963 4.242927 4.673096778 7.619172 2.008355 2.304377  
2.570024 4.358701 3.657402 3.164036838 2.802453 2.916746 2.58650614 4.558486  
8.113756711 3.190561 4.272467 5.179361721 2.66393 2.508522 1.7516 5.558911  
1.486007 4.461413627 3.585949 6.051803316 2.161968 2.193138466 4.898018091  
3.983878803 3.356424 2.723202 2.46354591 2.227883 2.081587633 1.150543  
5.432393429 1.504903 4.638202 6.733115 2.371467731 1.318399 2.836778 5.275846  
3.771779509 3.83854 3.929184631 3.021494 2.48723 5.405661 3.279022 2.676698  
3.264211 2.225125 4.21455337 2.583156 4.102374 2.949512 1.471593 4.817343  
3.868637 1.95222 3.402312 3.737078643 3.308485 4.643339 5.632104018 2.318226  
4.854171005 2.446509 1.168381 1.911965 2.290002 4.475581 3.172118 1.098453861  
6.395415711 3.942963 4.046583 3.547564 2.550266628 1.840425 2.189455 2.023495  
2.963865997 2.856366 4.496165 4.89059059 1.63377 3.779507037 2.672982721  
1.970282 4.397398701 2.608288 5.274058 5.636538144 2.803801 1.896229 5.978746062  
2.379721 2.749179081 4.245297289 2.335932 4.817689556 4.120742 8.974226  
8.932764 2.979334 3.210095 3.094557371 5.722564 4.200642 7.054032 2.071474  
2.086283 1.418561 5.291833 0.9846178 5.360871 3.161684 3.026813 5.498853786  
1.931839821 3.743602 6.891938147 3.376422046 2.521172 2.07387636 3.117911  
1.248786 2.313098421 7.261356722 5.534763242 4.420412168 1.271479 1.82426  
1.949816 3.260961 4.484953 2.776266 3.17593406 2.368187 2.988816 4.540831669  
4.920678 2.203602 3.553451326 5.513891 3.114142 4.789917277 2.936005 5.908559

2.504511816 2.916314 4.04445 2.375027 2.953848858 3.255976 3.701136 4.07768771  
3.261993 2.983278502 17.48034 2.496059 2.476329381 6.583207 4.028246198  
7.321576 7.065533 4.460053 2.135826 7.149549 4.684829194 2.494754 2.057363  
4.768776 2.285022 0.6730002 1.931253 3.064904 2.284623 3.429368415 1.323481365  
8.393701 2.82014 2.638877 2.664878 2.751455634 2.881068 4.600468823 4.925479  
3.607141 3.455954985 3.145884239 5.065285 2.473758 2.904934786 5.61985  
2.294122 12.03719 2.053073 2.791694 2.151772 2.715598 2.003165 1.123817 4.726085  
3.728118 3.779361 1.478378 3.403872066 2.927991 5.5352 3.89668501 5.044867  
1.392643 2.88953 3.343122 1.702099 7.323170656 5.643185 2.318894 2.022366  
0.1968416 3.740901 3.106849223 7.130396 5.378284 4.136804 4.37478717  
2.768787249 2.606336 1.461239 3.991642 2.817198764 4.660929 4.806767 3.00878041  
2.43517 5.239473 1.824564 8.663496 2.697574 3.037752 4.245643631 2.610123  
2.330095492 5.248051 5.494863 4.40578 1.383258 4.031509 2.404769 6.276111  
20.844576167 3.149948 7.90568 4.659023707 2.314853 1.440416 2.574911 2.938655  
6.06389 1.585252 2.608935 3.68311 4.072456482 1.566469 2.368344258 3.9908  
2.560253 3.032521 4.636564948 6.021877922 4.12721 3.177118 1.88427 8.123766  
2.887645 2.79835668 2.582311 4.632286 2.097254 5.854394873 2.322039 1.618686  
4.811367674 1.535392 2.397787758 3.730358 3.341226 3.299255931 1.828618  
3.434364 3.14782525 2.555539782 5.491611 2.008049 2.360431 2.351671 3.236157  
4.233856 4.365449 15.89012 4.207895 3.860901666 2.467989 3.555616564 1.162334  
2.048244992 1.975119 2.469532 4.184856509 7.392176 3.909721 3.620394 6.916224775  
3.38531 3.244961 3.421842422 1.663953594 1.002478 4.982998 1.499521 3.55706014  
3.549388076 6.890699632 1.222854 3.638309 1.34635 2.844433 3.426047 2.412494  
3.56589 2.022646 3.728899 1.937549 3.370585 1.557305838 3.35491 7.014774  
2.558445 2.940919 5.256965 3.362389 2.66299 4.123375 1.881737 2.438281 2.453445353  
4.824851 2.70101 2.408818 2.270929 5.506668145 6.421553 5.667236 1.996261  
5.682077 3.867532 2.68028 2.523016 3.812254112 1.485351 2.307178 2.005490963  
2.608219 2.575547 3.829324 3.082527 2.831658 2.544418545 3.642626914 7.710049  
2.359979 5.239633 1.602476989 2.598701795 4.137655858 5.472388 2.409708 2.64456  
5.667688 3.628931 1.535213 3.518756 4.789710516 7.780889062 5.510565 2.796879794  
4.530615 6.720138843 2.046654 3.563694 1.255422 6.613088 3.464023 1.612243  
4.253165 3.260491 1.242135 2.64304486 3.886938 2.409886 2.379761 2.599705  
2.657534162 1.864763 2.353332 2.530796 3.807599207 4.066881 4.840411 4.099635  
2.340511 2.641455 3.203225 5.750767 5.981174748 6.924664021 3.68746533  
2.879625 2.897686328 1.239755957 4.505518 1.744308 7.309312406 1.701661  
3.291613 4.640526 5.181601429 3.009458 1.712529 2.530944 6.705934664 5.286573  
3.942816 2.264172 16.69488 5.065185 3.446653 2.448213 2.375023 4.110167 2.122312  
4.267253 1.454948407 1.020149 12.01684 1.317909 3.6897 3.126482 3.279445  
4.158215 1.923220767 1.944694192 3.128493061 3.345731 3.574764 2.403795  
6.506096 2.763505 3.815198673 2.275853 2.976805 3.215351 1.767016 6.251836  
2.528559113 0.969406 3.371419 2.057545 3.265272 1.351931 5.591034 4.223203  
3.102852104 4.782207 3.066769 3.771141967 1.184515 2.087498 3.100846 2.544108  
3.459314 2.90486233 2.494310485 4.915823339 0.7044717 3.400769 2.150144  
2.328112 5.482227 4.796333 4.434378052 6.007359 4.880593432 1.048157 2.063416



0.8736821 3.190363 8.490174 2.261281013 4.033757 5.257984 1.561945 2.787385  
3.679194 5.447599 2.031677 3.719788596 4.150846 1.49458283 3.727004 1.428203  
4.10972601 3.611499 4.086367 2.828681 3.82320443 4.826442 2.691904 2.52114  
4.385945556 2.253059 2.470911 2.046048 3.38145 2.742658 2.941416 2.083255  
AC069281.2 0.6429723 0.581375384 0.311732 1.287441386 2.136143479 0.352017212  
0.597938 0.697328556 0.1741094 0.1975493 0.252142865 1.435595 0.4024925  
0.9544236 0.6509735 1.412086 0.4646188 0.576455866 0.3291121  
0.3323082 0.298907804 0.8268996 2.081071049 1.158128 0.9453296  
0.849265112 0.233187 0.8147699 0.4320448 0.7343589 0.332618 0.260039214  
0.9393227 1.384770421 0.5534306 1.212865579 1.18421615 2.16039043  
0.8770563 1.27841 0.803957709 1.244754 0.21603389 1.077047 0.529736832  
0.5986906 1.727069 1.333408 0.287835624 0.1633354 1.133908 2.465948  
1.77378467 0.4670616 0.48097928 1.345632 0.3783954 1.402838 0.2572655  
0.8561274 0.1062339 0.7812506 2.23512101 0.3544529 0.1688349  
0.9024561 0.2014804 0.5774588 1.026568 0.2534184 0.09245478  
1.029798256 0.2318864 0.1348017 0.572686087 0.3058378 0.312895176  
0.8994755 0.3713013 2.481514 0.2485909 0.03427821 0.5619634  
0.128081476 1.093213728 0.3718613 0.7166726 1.052903 0.608965899  
0.2309545 0.3267559 0.2549902 1.16482854 0.3621025 0.7723473  
0.4537585 0.08887176 1.269524211 0.249244554 0.3305823 0.916845552  
0.3438976 0.722485 0.516180757 1.77703 0.1920538 0.16445807 0.4621978  
2.045089648 0.808580718 0.1503521 1.759126931 0.3968812 1.866101  
0.8389746 0.2962638 0.8194395 1.028586479 1.185449 1.001824 0.1826149  
0.2497603 0.3927699 0.5141458 1.567002 0.115107 0.7581959 0.6177891  
3.235203 1.574313967 0.647068404 0.276962 1.606291908 0.75605068 0.180452  
1.207287261 0.5745333 0.2583411 0.254345802 2.074492809 0.395948117  
1.480041748 0.966682 0.3914486 0.4982198 1.400413 1.3031 0.6550391  
1.782160135 0.4063174 1.371172 1.788302043 2.22397 0.2825281 0.398260413  
1.262436 0.3475114 0.746156196 0.7191577 0.6860829 0.575928717  
0.7734411 1.260847 0.5106506 1.147859567 1.200049 1.218861 0.412094984  
0.1402746 0.662262486 1.548315 0.4908825 0.508285432 0.6882022  
0.875327412 1.112755 2.411522 0.2173245 0.3538903 0.32698 1.050274695  
0.2275988 0.4061138 1.335589 1.098069 0.9980772 0.26531 0.8247063  
0.70795 1.122307555 0.503501836 3.096728 0.4682933 0.8231739 0.5153264  
0.793364508 0.9111139 1.02562938 0.8655632 0.8674841 0.218843775  
0.638598521 0.3041276 0.4629857 0.746702807 0.8700976 0.2900041  
1.015329 0.7045045 0.6072754 0.6687789 0.8050744 0.4234496  
0.2609291 1.464172 1.800819 0.2536635 0.1370296 0.827603122 1.129424  
1.046728 0.947646289 1.037543 0.6952536 0.8841034 0.8030723 0.397447  
1.201138711 1.714659 0.3642457 0.9503595 0.1479331 0.2588927  
0.386733254 0.6239947 1.470307 0.4947573 1.088862853 0.215161381  
1.258957 0.1682303 1.584685 0.531862011 1.022056 0.9157479 0.83628508  
0.7485884 0.7000251 0.1994504 1.067468 0.1912391 0.7739691  
1.387818944 0.3618382 0.197165999 0.2281207 2.656161 1.005449 0.2197759

1.081411 0.3866706 0.5674237 1.370020849 2.385738 1.335484 0.25059136  
0.6757058 0.2405602 0.6893602 0.2726966 1.608933 0.004741773  
0.3443185 1.000045 1.133292184 0.3557925 0.201973404 0.7351032  
0.6084813 0.4323551 1.264025654 1.239967421 0.1417937 1.102386 1.31974  
1.32149 0.5187218 0.471482359 0.1588152 0.3034996 0.2227276  
2.704588002 0.3124543 0.1401725 0.731599011 0.1297557 0.265297154  
0.3910028 0.8415884 0.89610078 0.4275502 0.4957931 0.26285521  
0.807626148 0.2422635 0.3375229 0.9274791 0.7357989 1.035068  
4.388073 0.5900322 1.333832 0.4500759 1.594891895 0.2493818 0.223345203  
1.527065 0.440614193 0.407589 0.2822571 0.583431582 0.9800998 0.34184  
0.6030625 0.619112909 0.4129675 0.2457603 0.29535553 1.103486756  
0.8502616 0.5419436 0.1628759 1.697694483 1.089695961 2.323368878  
0.1255242 0.201299 0.02932833 0.2824572 0.5602406 0.1872458  
0.3657257 0.2642055 0.445871 0.1867408 0.2585629 0.37687318  
0.4513062 0.6198908 0.5569816 0.4612591 0.5895975 0.1546548  
0.2450838 0.1092709 0.7003602 0.7719903 1.525807755 0.988195  
0.5524676 0.6803842 0.2993535 2.948576852 1.309126 3.751467 1.040179  
0.321446 1.263107 0.2126227 0.23965 0.440921209 0.20036 0.3182611  
0.251582531 0.5839289 1.476044 1.518087 0.3242419 0.440094 0.219352942  
1.541536972 1.82043 1.018314 0.9899335 0.311114845 0.672704163 1.267303785  
0.9896291 0.4317076 0.396542 1.127684 0.5067433 0.1730647 0.313418  
2.58308146 2.841643965 0.4597364 1.121039754 0.7517651 0.321912382  
0.5888549 1.482949 0.1677319 1.427708 0.5015111 0.4655808 1.624477  
0.2572566 0.5265934 1.597544956 1.460583 0.03018517 0.4626889  
0.4093605 1.065187517 0.2152411 0.8737546 1.349137 0.743839903  
0.418795 0.307023 0.2422678 0.2057279 0.9984346 0.263177 1.173178  
1.333364523 1.336636794 1.614272194 0.2544987 0.471075524 0.155286406  
0.400773 0.005296592 1.646445195 0.4637984 0.1954575 0.3450542  
2.262472552 0.2876964 0.1362731 0.4132936 0.496875397 0.6527134  
0.6009789 0.4083843 1.191244 0.1886485 0.9079891 0.4308861  
0.224517 1.607636 0.38244 0.914467 0.368317582 1.130472 0.8113744 0.2351761  
0.5678643 0.3087029 0.3647785 0.2472558 0.142441798 0.282815979  
0.35542074 0.1502246 0.589391 0.3190345 1.030065 0.6135581 1.79879918  
0.373921 1.258535 0.3715608 0.2768621 1.000959 0.272241201 0.5894188  
1.628621 0.3326294 0.9369672 2.494029 2.070546 1.819205 1.234327992  
0.2083472 1.10727 0.374029418 0.1148649 0.9161408 0.6586665  
1.157992 0.6827202 0.602097554 1.012582024 0.254595846 0.6549298  
1.878544 0.4133201 0.339327 0.5834116 0.5483729 0.860021866 0.4187579  
1.009002676 0.2657904 0.9062402 0.7997525 0.5990563 0.5429725  
0.744511744 0.9970281 0.2791644 0.3560691 0.5691569 0.9519145  
1.506402 0.6483341 1.244544615 1.147403 0.20824317 0.1935215 0.2095574  
1.055767783 1.822215 0.5291642 0.4697114 0.623654882 0.1499404  
0.8135042 0.6171103 0.441444772 0.2842988 0.2006384 0.3915482  
0.5327162 0.541065 1.497706 0.6590583

Z69706.1 0.404605 1.027648868 0.2090086 0.64978718 0.945683945 0.844699053  
2.326808 1.276462745 0.05836803 0.7947114 0.782485773 0.656271 0.2072535  
2.353245 0.9208861 3.223418 0.741192 1.072535921 0.5756387 0.3865523  
0.426189005 0.8134659 2.700593763 2.441041 1.194635 1.16115245 0.5924695  
0.2324609 0.5896963 1.141402 0.4667696 0.687846083 1.871384 1.645046706  
1.347539 1.007169899 2.6981529 2.645065892 0.8073155 1.353383 0.644156577  
0.7620049 0.419552169 1.000816 0.734845804 1.086516 1.327595 1.798741  
0.457782362 0.3865142 1.457683 2.7987 1.762321193 0.707358 0.513692501  
3.247968 0.7025672 1.802345 0.157491 0.9155133 0.2249281 2.670037  
0.878352988 0.4127638 0.2953034 0.4719582 0.140961 0.798542 1.87715  
0.8227259 0.3719319 3.542183317 0.2332112 0.3148766 0.884028299  
0.5447309 0.617922471 0.9649218 0.5920935 1.614859 0.3077059  
0.229827 0.9325368 0.611862716 2.339735912 0.6731743 0.7081219  
3.704512 0.904085342 0.6656208 0.2003033 0.1977423 0.74478401  
1.242466 0.599604 0.584129041 0 2.918347376 0.448958478 0.1477648  
0.794899545 0.2951358 0.2870568 0.902834239 1.667095 0.3945213  
0.075610338 0.6632089 1.16456565 0.888314994 0.1924504 0.941599288  
0.3547988 2.20529 2.566955 0.3300439 0.7229131 0.649074681 1.552661  
3.629279 0.7346329 0.6788842 1.095845 0.6813331 2.516058 0.1764032  
1.25956 1.32548 1.109211 2.8255958 0.871317279 0.7615894 1.440545268  
0.638710785 0.4487578 1.472945093 0.607339 0.7469739 0.198037839  
3.944332592 0.293715296 1.059123005 0.4230514 0.5051051 0.8907841  
0.9180767 2.463192 1.26994 1.78014878 0.7692021 1.161268 0.766232766  
0.3719183 1.147603 0.543099209 1.860859 0.8559104 0.438447039 0.5260118  
0.4906684 0.336529467 1.154471 2.28821 0.4057821 1.07455192 1.206905  
0.9032389 0.47767035 0.3407119 0.703048532 2.015635 0.6018278  
0.644017961 0.4051515 1.605572566 1.141056 5.099347 0.5358395 0.5152251  
0.3842719 0.608158272 0.3902541 0.2993104 1.898201 0.5150295  
0.7379133 0.6278252 1.624277 1.795464 1.147102325 0.614887974 1.948114  
0.5846507 2.664005 0.8292327 0.814873515 0.9376288 0.548664245  
0.8593952 1.454067 0.135442477 1.70174954 1.025061 0.296685 0.746725944  
0.7817871 0.2560925 0.2763961 0.4525061 0.9952877 0.7350816  
1.062292 0.5309532 0.2651821 1.118604 1.888176 0.2587059 0.4767567  
0.835813759 0.5838025 1.006938 0.670671974 1.15772 0.3408411 0.9958528  
1.107648 0.8812671 5.127205934 1.8916 0.7326532 1.012012 0.1190226  
0.5207436 0.528962009 1.149727 0.4891962 0.2151714 0.76798064  
0.364447316 0.8836107 0.4261117 0.8275177 1.41542909 2.022088  
1.770195 0.259899222 0.8651709 0.4171996 0.2971702 0.5949884  
0.5030212 0.5695543 2.990887554 0.6645228 0.166983077 0.3863983  
3.042091 0.4927643 0.3014066 2.000164 0.7664874 1.559819 0.516289555  
1.583088 1.221012 0.331427485 1.244181 0.2732437 0.9191157 1.143111  
1.549269 0 0.4104126 1.532584 1.050649102 0.202066 0.812509096 1.277515  
1.005595 0.7547908 0.786962433 1.180414999 0.8556226 2.140907 0.7204114  
5.103512 1.050468 0.559028462 0.4406137 0.8618358 0.3179356 0.797730455

0.8825446 0.1288899 0.443314316 0.1789673 0.604104434 0.3020057  
0.942076 0.664978001 1.255852 1.220166 1.26891311 1.584858731 0.3341452  
0.6527907 0.8690942 0.7351659 0.5797869 1.342509 0.7775626  
1.609742 0.7623531 0.857586019 0.1337635 0.313756555 1.284163 0.545392508  
1.545074 0.279981 1.760294146 0.6975717 0.6798601 0.2274404 0.892155064  
0.1356169 0.3042022 0.21851431 1.414678579 0.6061604 0.4899234  
0.2030277 0.59675885 1.729120387 1.839284653 0.3366434 0.3959004  
0.1415803 0.2892358 0.2711296 0.3822524 0.473509 0.2329556 1.01052  
0.1669401 0.5720882 0.521161093 1.012749 0.5640578 0.8795093  
0.147268 1.088724 0.1777581 0.3317167 0.8516878 0.2549724 0.2973449  
1.067495419 1.0259 0.5836856 2.945625 0.5874413 1.302728745 1.071136  
4.188264 0.9298854 0.3026473 2.107581 0.2701105 0.06356547 0.458731224  
0.3684656 0.4589816 0.469012344 0.9093134 0.1457155 1.045957  
0.4119086 0.9318069 0.252121258 1.083458615 0.2067066 1.475526  
0.6513199 0.242239152 1.012638551 1.258808757 0.8912981 0.4120973  
0.9203248 2.827098 0.8682726 0.185657 0.5358545 2.055068456 1.814525854  
0.5628766 0.450977693 0.9426201 0.634288576 0.9475504 1.516361  
0.5190465 1.327173 0.7285435 0.6345556 1.014852 0.7037356 0.385165  
0.920533387 0.6267421 0.03469442 0.3149941 0.93568 0.882224751  
0.07612158 0.2396581 1.122202 1.315605576 0.6220617 0.3941834  
0.6356134 0.5958812 1.105226 0.3759948 2.20383 1.480949827 1.586682854  
2.150603103 0.3460769 0.686144976 0.343581818 0.4273435 0 1.339291495  
0.4390099 0.3194329 0.9518413 1.564336133 0.2509937 0.690334  
0.2418355 1.066056611 0.7610926 0.7760355 0.3911594 0.7958163  
0.2891067 0.4930032 0.4554896 0.4576206 4.418242 0.230056 0.9537539  
0.339553292 0.5321802 0.3326409 1.106184 1.643478 0.4918281 0.5566189  
0.3438378 0.112357306 0.194246039 0.321304496 0.5895915 0.8175974  
0.2823543 1.416236 1.441635 1.066776816 0.5620196 2.005435 0.4599182  
0.0518035 0.6387193 0.346989636 0.3973985 6.410296 0.4202357  
1.346172 1.369421 2.133165 2.50469 1.655172911 0.7263968 2.158512 0.682528436  
0.266982 0.4686762 0.967723 2.062688 0.453028 1.187013564 1.375010139  
0.757018416 0.1262125 0.9446378 0.7782971 0.3412656 1.027874  
0.3803488 2.009944548 0.4535464 0.745543167 0.1034744 1.061846  
0.7995622 0.4171006 0.2102533 1.116171615 1.24663 0.4428878  
0.4407426 0.3109379 1.34971 1.858128 0.6299884 0.501916661 3.115686  
0.550837109 0.1638965 0.04112286 0.767565805 2.945902 0.7095831  
0.6081405 1.170806577 0.1419266 1.033455 0.899922 0.691488016 0.3498352  
0.206078 0.5209126 0.3498838 0.8291903 0.413619 0.1919489  
AC012409.3 0.04834403 2.114213525 0.4495191 1.278768079 1.788261809  
0.249352608 0.6487073 0.744852914 0.4556396 0.4623929 0.177755763  
0.3366583 0.967843 0.414365 0.4492957 1.635302 0.7367244 0.775835555  
0.7061403 0.5208868 0.797793295 0.7127748 6.291046782 1.82945  
0.3552648 1.195295959 1.032368 0.1555426 0.1038352 1.40391 0.1561609  
0.68717413 1.68561 0.854727608 1.323083 1.51005899 1.191042435 1.54510572

1.767273 2.64962 0.613595801 2.336893 0.233939894 0 1.229237476 2.080034  
1.184415 1.32535 0.315317263 0.6681061 0.9669468 2.503043 1.868981235  
1.848838 0.477386677 2.544092 0.5712983 4.48121 0.163087 0.632029 0.2006698  
1.473289 1.237300072 1.108927 0.3457849 0.607295 0.2881965 0.8905249  
1.062791 0.4786928 0.8295484 1.759429227 0.4063663 0.07803262  
1.254728702 0.5341614 0.063805563 1.503333 0.9154102 0.1637156  
1.201025 0.05126008 0.8666287 0.736211445 5.89496494 0.3127985  
0.1269144 1.518835 0.861870315 0.6340417 0.153571 0.4272573 1.228558299  
0.4538983 0.8054453 0.537416581 0.4616526 1.483672616 0.367160471  
0.2059821 0.549606996 0.3908444 0.1800689 0.73834232 1.57553  
0.6782803 0.189719519 3.090484 2.387951228 0.597296887 0.1686289  
0.541437588 0.8632746 2.071888 1.855414 0.4498526 0.5482054 0.723840674  
2.201491 1.953072 1.313632 0.6965172 0.4405149 1.234699 1.341942 0.1967228  
0.2203367 2.330944 2.597657 3.042414516 1.834051817 0.7234913 2.386769745  
0.949710634 0.7359553 2.774681674 0.9218772 0.05432718 0.220849537  
4.468127433 0.188969968 0.654405368 0.2540365 0.8449312 1.942958  
0.4886455 3.433655 0.8320307 0.802239001 1.256072 1.246469 0.166151617  
2.073795 0.9967628 0.408819175 2.507544 1.193127 0.33850463 1.893126  
0.7067843 0.158778154 0.910637 1.127039 0.4808063 0.485808662 0.8916766  
0.935333 0.125339417 0.4630739 1.34110685 1.455551 0.4194697 0.754111552  
0.5873664 2.950282366 1.125666 3.134639 0.5346608 2.071487 0.2472321  
0.553277526 0.3012971 0.1808016 6.529952 1.723065 0.2420331 0.04200861  
2.447283 2.347502 2.804477645 0.181513072 3.030087 0.6882178 2.970868  
0.3993242 1.741747144 0.8792822 1.284914613 1.338438 1.243195 0.302087808  
3.083878945 0.2765653 0.0551433 0.605629271 1.228502 0.5553167  
0.3424819 0.730385 0.8324501 0.7049889 0.3033875 0.4194134  
0.012322 2.670331 0.3222967 0.2243934 0.8473549 1.227251783 1.019035  
2.194809 0.039364512 0.7134891 0.3912816 1.090732 1.317586 0.2527146  
1.212866989 0.5637432 0.6057413 1.003186 0.02212211 0.4597425  
0.190847539 1.0471 2.132589 0.4199242 1.776326723 0.152410307 0.9493416  
0.349408 0.4955983 1.394927296 1.522132 0.6269104 0.660183469 0.9277199  
3.14048 0.2982607 0.5914021 0.7259527 0.5504723 1.593581746  
0.7410682 0.209494824 1.109585 3.710552 1.969132 0.3809419 1.449864  
0.3268269 2.057692 0.028788011 1.489592 4.520707 0.138601555 1.116029  
0.3428081 0.7952488 0.7813195 0.5567119 1.021091 0.6674609 2.99096  
2.217807494 0.3755694 1.042015998 1.503819 1.844454 1.646871 1.518943017  
1.634865652 3.445652 1.044538 1.362278 0 0.3166136 0.400771388 0.8107561  
5.246056 0.2256279 0.79077324 0.7456089 0.1617036 0.672904837  
0.1496867 0.494039603 0.1262975 2.954791 2.946788343 0.5023575  
1.099039 0 0.883708181 0.4657936 0.5095893 1.721172 0.9277235  
0.7200458 0.9874825 3.046361 1.04718 1.296505 1.77105581 0.2051108  
0.22266219 0.09676242 0.219633374 1.916452 0.3295778 1.189733293  
0.3551392 0.2929302 0.1902292 0.518188095 0.09452401 0.3053185  
0.289375538 1.468831096 0 0.6966051 0.5145776 0.868845469 1.208579457

1.527896887 0.1608947 1.184032 0.1842035 0.1151973 0.5480287 1.00302  
0.4148979 0.5520525 1.380477 0.09308486 0.2899937 0.792535773  
1.088087 0.6786911 2.919103 0.4762717 11.10064 1.486753 0.595993 0.5055347  
1.322192 0.4237056 2.398424152 1.453925 0.1251768 1.03199 0.4039832  
1.873332183 0.9954322 2.354652 1.196536 0.1994371 2.656218 0.5187748  
0.3780666 1.500610683 0.128409 0.5253208 0.233990332 0.5492803  
0.8531265 0.5267792 0.8421522 2.143227 0.472864622 0.890297341  
0.3951717 2.424932 0.1660216 0.045023723 1.90809878 0.514730023  
0.1987931 0.820654 2.069777 2.731159 1.031437 0.3278173 0.6327305  
3.252861636 1.763369278 0.5828769 0.859163839 5.912995 0.618932456  
0.6194433 0.5340091 0.9406065 1.505567 1.843667 0.3994794 1.337524  
0.2769875 0.4510081 0.798442029 5.504119 0.6964348 0.3193435  
0.6678142 1.499195383 1.156625 0.08908799 1.274221 1.79797588 1.083931  
0.4982007 0.6852012 0.6829788 1.172412 0.3751677 2.480872 4.189267981  
3.866577245 2.892101444 0.1929705 0.746962447 0.087081482 1.08311  
0.9029474 1.642918843 0.438581 0.2055161 0.2506278 0.71367128  
0.3110059 0.4528545 0.3876825 0.636886158 0.1485333 0.4659986  
0.1454055 0.250811 0.9470748 0.5497916 0.3668577 0.1745877 2.92774  
0.4169032 1.506789 0.206545066 0.1618585 0.02318484 1.671858 1.594525  
0.1645443 0.6207351 0.2601941 0.288189045 0.263039744 0.698714456  
0.3945034 1.846345 0.4723175 3.655949 1.144873 1.050863971 0.7373622  
2.218107 0.09325373 0.3177387 0.1548462 0.26603423 0.2954495  
3.206397 1.023613 1.751441 0.4051657 1.16112 1.920326 0.734136905 0.6387086  
0.8753265 0.155689347 0.2404785 0.8315082 1.683028 2.145211 0.2210301  
2.540157358 1.610065389 0.769728446 0.05278152 0.9763677 0.578632  
0.2310637 1.29911 0.1555256 1.50655993 1.047707 0.39261558 0.5577351  
1.460462 0.1061503 0.4651459 0.1693409 1.306978934 1.722673 0.687937  
1.298994 0.6462242 0.1750211 1.200913 1.067885 0.825604302 2.702449  
0.422322488 0.01523129 0.183439 1.769026619 2.292025 1.582638 0.8961814  
1.039206837 0.1450853 2.842826 2.976142 0.192784885 0.4051373 0.2298158  
0.01383133 0.3414132 1.155879 0.5381404 0.3077101  
AC107375.1 0.5952101 1.311932387 0.9150901 2.970771409 1.532320191  
1.254810276 1.194946 1.157243017 0.2146615 0.4744139 0.348174148  
1.312989 1.479979 2.695067 1.933278 2.49405 0.7901156 1.172686221 0.8750431  
0.8766733 1.044936735 1.33202 2.810398273 2.381122 1.454749 0.930727566  
1.349732 0.8207298 3.804807 0.9712466 0.8087326 1.285934573 0.9470697  
1.054171214 1.465216 2.875472821 1.591824042 1.741742947 1.950064 3.51734  
0.921289232 2.235282 0.484941807 0.9815266 0.85040533 1.500684 1.88791  
1.071044 0.838497189 0.4074944 2.0766 5.632189 2.033358172 1.799348  
0.957204153 3.147446 0.7895089 1.782095 0.3364924 2.576026 0.5735414  
4.139257 1.813523638 1.131623 0.4126968 1.094846 0.5875375 1.073866  
2.287051 0.140325 1.299469 2.800092655 0.5432012 0.7033953 1.497527584  
1.100702 0.258116527 1.335987 1.37252 1.583734 0.7041422 0.586033 1.981554  
0.307930532 2.305263485 0.3117609 0.5394572 1.188776 1.272786301

1.509581 0.6568552 0.9151119 2.183678786 1.192258 1.136001 0.959558279  
0.5720759 0.631345485 1.592437543 0.9147875 0.389789378 0.3256284  
0.6246316 0.38368769 1.634964 0.5884368 0.908374675 1.498303 2.044763163  
0.858382056 0.8965206 1.760328521 1.644904 1.955395 2.529135 1.087933  
1.460498 1.064256276 2.55602 2.664323 0.4471905 0.8322494 0.6248393  
1.097759 1.354478 1.016394 1.205006 2.581116 2.465753 2.460577335 1.618254114  
1.044292 1.311867503 1.804629603 1.326798 1.48359779 1.290539 0.5494326  
0.40462684 2.158109815 0.348988822 1.066782841 0.8617103 0.9470305  
1.348965 1.26872 3.762944 2.296323 1.835521908 0.9227643 2.121174 1.502928994  
1.631243 1.991242 0.732368431 2.00876 1.266116 0.735955495 1.793833 1.353407  
0.863190019 1.415274 2.000996 1.330682 1.388506918 1.213235 1.621385 0.985151804  
0.4594495 0.789293841 1.677028 1.374125 1.318475947 0.9602448 2.979265804  
3.292629 4.421671 0.857414 0.6781587 0.2971439 1.177177716 0.8832287  
0.3363496 5.024785 2.865488 1.415454 0.4063782 3.65197 1.502802 2.66104167  
0.505486649 2.011123 0.9158188 1.04325 0.8224916 1.931322063 1.107648  
2.1093103 1.627536 1.687482 0.79699186 1.781283433 1.135021 0.6223456  
1.256617961 0.9409733 0.3767349 1.889952 1.372229 0.7043482 2.040186  
1.124401 0.6075063 0.1950533 1.799838 3.335099 0.514487 0.8036321  
1.168078763 1.991479 2.098502 0.424072776 0.66481 1.086383 2.450367 1.095352  
1.438412 2.209441825 2.526831 0.7185321 1.571468 0.07781905 0.7979794  
0.427219771 0.6107659 1.188515 0.4088594 2.008476485 0.714846013  
2.214006 1.026311 0.9393151 1.799750408 1.379918 2.862179 1.267369516  
2.047812 1.534345 0.6338876 1.148014 0.8633205 0.8471747 2.069564894  
1.412049 0.378705793 0.9426403 3.011428 2.43647 0.6601674 2.071954  
0.9506974 1.501772 2.29118243 2.603799 2.957772 0.677165823 1.372726  
0.4410459 0.8625473 0.876973 0.8947626 0.3460942 1.836417 5.166718  
1.812398293 0.470657 1.215194577 2.56379 1.511761 0.7161047 1.276429569  
2.548727639 2.517394 1.865308 1.535927 1.814366 0.8701197 0.499302587  
1.085705 2.500457 0.2976347 1.782031068 1.029462 0.3476157 1.189578848  
0.3949153 0.898565857 0.3887426 2.29536 1.338646884 1.95457 1.714429  
9.4371265 2.448041987 0.3823224 0.9347049 2.204336 1.536861 1.208301  
2.479193 2.006779 1.736588 0.8598086 2.071492288 0.2459725 0.713325993  
1.131769 0.78746323 1.198319 1.189867 1.6805916 0.5428397 0.5379513  
0.585524 0.610649017 0.5652629 0.4475086 0.589332408 1.435254052  
0.5307834 0.8828832 0.629021 2.779970745 1.618169196 2.494077325  
0.7428487 0.6706479 0.1851353 0.6534335 1.512328 0.7387438  
0.4726752 0.3141402 2.068803 0.4443898 0.9499797 1.672744263  
1.556463 1.499426 2.510659 1.9498 5.300568 0.958826 0.7726427 1.01041  
2.112991 1.198857 1.97067417 2.431473 0.8256285 2.026031 0.614527 1.77353846  
0.6346717 3.547421 1.68947 0.5464079 3.61718 0.6328271 1.407852  
0.899779398 0.3670102 1.006882 1.404127074 1.625654 1.857791 1.770328  
0.3905039 1.188002 1.461093081 0.999660482 1.158415 2.065907 1.072215  
0.445444249 3.921116025 1.111091978 0.7648544 1.573316 1.098147 1.708701  
1.814145 0.4324368 0.7805614 1.991078781 2.313418798 0.5520278

2.460213695 3.543733 0.609103728 1.097521 1.575189 1.660751 3.321308 1.699231  
1.008769 2.043364 1.126604 0.6799344 1.655117104 2.663537 0.7315531  
0.7020977 0.6974108 1.648039747 0.8631917 0.6169773 1.931005  
1.328197261 1.455276 0.4896755 1.122053 0.4545304 1.824165 0.9946489  
1.345748 1.735802525 2.773606551 2.057457744 0.6363874 1.177610539  
0.819424646 1.647852 0.6164535 1.414974208 1.040492 0.9157305 0.5964  
1.717241528 0.5401759 0.5675093 0.5114073 0.597434044 1.119635  
1.090391 0.7480596 0.8059282 1.116417 0.9999683 0.912034 0.54919  
4.686326 1.812026 1.820634 0.794680058 1.441219 0.8869369 1.149099 1.128261  
0.4642606 0.9118857 1.083892 0.572997078 0.578310149 1.142279968  
0.9034809 2.104828 1.290159 1.723314 1.708401 1.682663906 1.094269 3.401567  
0.6868319 0.4064404 0.9259955 0.712506901 1.877243 3.659564 0.835118  
1.452248 3.083481 2.328651 3.579073 1.328131085 1.157644 2.684626 0.730225607  
0.6898379 0.9506252 2.440469 1.954743 0.7636344 2.304673107 2.166041577  
0.840690239 0.1469886 1.92065 1.196987 0.3884772 1.243277 0.8828092  
1.349144503 2.001622 0.294500504 0.1014801 1.848449 1.624314 1.062424  
0.3894905 2.937334099 2.006663 1.202223 0.6252155 1.406905 0.6310645  
2.153645 2.026535 1.759767957 2.298799 0.568356823 0.5558842 0.231899  
1.750194534 5.543085 0.7704681 0.7987758 1.095515272 0.5625641  
2.077749 3.85747 1.479622619 0.4750511 0.7073711 0.2858454 0.3645865  
1.041923 1.230462 0.5706307

AC078864.1 1.482047 32.823373373 7.623973 19.192760353 3.16277314 8.175064204  
2.04916 3.203158488 4.676853 2.104136 3.281979897 1.542493 4.373068 31.0625  
2.644063 24.81207 5.474158 3.065933156 4.335673 5.299869 10.114675626 10.86342  
42.50868206 17.66648 15.40068 1.76536692 16.61547 3.874288 1.458965 16.6416  
9.740838 18.524767536 3.947357 6.910174665 7.448656 18.961853051 16.334716027  
14.856059817 23.67092 26.79734 9.061177784 30.15059 2.177129252 1.929832  
6.594666992 4.217535 0 13.79507 3.538609268 5.657224 9.47823 17.14079  
18.089573733 7.982214 2.561104931 21.72879 12.07206 18.49793 2.668075 0.2328803  
4.085168 16.90735 18.422207896 10.02228 2.870961 12.14009 5.0199 3.257405  
18.54289 0.1910798 20.1162 23.771649177 3.301282 9.942529 8.585999281  
9.271357 0.024450491 14.31109 5.118055 2.352613 2.301183 3.732175 11.92522  
2.064281901 41.753893977 1.518294 4.10687 1.367752 11.746445001 7.733454  
4.600912 12.59637 24.136141708 14.41832 2.125603 6.677439183 8.724717  
10.453946786 5.340092189 3.551984 0.679390705 1.300658 1.341724 6.108825682  
11.47121 0.842981 3.796613653 21.81308 17.498714149 2.567989647 7.284335  
15.59247962 6.478353 7.745891 25.79916 13.2423 5.807929 10.488355937 32.60727  
32.82243 0.2706386 4.380766 5.445377 19.99149 5.05471 4.099049 2.453855  
16.23055 30.96894 27.481050533 8.424463852 2.01906 11.608608316 6.303823579  
11.19621 14.928264306 4.325709 0.5551558 0.45841376 34.066577812 0  
4.862494993 4.380641 5.332852 12.17587 6.642934 36.60587 31.40881 3.152362675  
6.603624 14.26749 0.090956884 10.90484 10.37429 10.73416493 10.85153 13.0762  
2.450191719 10.72851 11.3142 6.112084989 11.64199 3.829922 11.56959  
16.816760236 11.57244 15.50867 1.200761405 3.094024 8.697045681 0.6707383



3.978367 8.359717915 6.66585 50.173358708 15.98841 23.99749 1.506498 5.504455  
1.357942 3.72740755 3.784457 2.558168 1.752983 33.39513 0.9274784 3.997628  
33.26628 15.4779 24.6674681 0.115927294 1.533579 12.11063 9.091757 13.57066  
16.420063844 3.141772 15.287328976 11.271 14.2401 3.286785314 12.272040505  
1.342422 5.212334 10.153457524 2.923303 9.150361 0.03281004 1.094099 9.932422  
39.70635 4.761084 0.9454148 6.586954 11.31583 5.516561 1.842606 7.130865  
7.738895366 27.28057 7.677097 2.074133052 3.287445 4.648151 4.369707 9.545823  
8.204587 17.727824326 9.756111 1.619456 11.25241 0.4662493 8.669652 1.462667467  
7.369933 18.86246 2.499949 14.495134586 1.752123181 16.27848 6.105578 2.423051  
11.710656987 7.993174 28.57251 4.751169847 11.30506 33.57751 2.920858 0.3592869  
3.097996 2.47452 24.568635431 9.263146 2.006976781 13.6228 42.12872 11.4064  
5.581517 20.40733 7.273617 18.61543 0.055158279 2.818845 20.92385 5.252240966  
7.28188 3.089513 10.19192 7.563892 2.317246 5.665483 12.67904 29.79393  
21.046327837 4.065722 4.976829806 12.33416 10.14966 6.591344 15.81273081  
4.068088486 2.234497 10.00675 15.59395 1.635716 0.2123228 0.767884241  
6.943323 25.01372 1.204283 11.268808266 2.685765 1.273732 17.023972029 1.115342  
4.259644195 0.3495382 23.49492 12.974795369 11.22946 9.400787 5.87450592  
20.445374105 1.844433 5.57932 18.63413 21.70243 4.504878 5.187829 38.97808  
2.837643 6.760077 12.487603827 2.822422 3.108262288 2.261859 2.29832995  
17.51757 5.749757 11.853647414 3.207846 1.749807 0.5669722 2.501998345  
0.4346628 0.357497 3.005692071 18.501438562 0.06167592 2.486218 6.941009  
4.144093931 11.63032286 8.38139905 2.723111 9.805071 7.058734 2.251342  
5.105326 1.801689 3.577279 6.346447 6.531571 4.790026 2.611473 8.807363366  
14.06574 3.488832 11.52168 7.583556 55.83114 19.84554 2.20511 5.811674 24.95204  
3.42379 15.429871166 18.08449 3.11793 16.18052 3.640071 2.124299557 6.341651  
21.15252 2.394474 0.8230374 19.61715 6.573098 9.054769 1.339578797 1.992872  
5.806863 10.074219303 1.861991 6.460577 7.461737 1.760266 8.486677 4.162776237  
2.68057997 0.4101257 24.01924 2.524919 3.536912408 19.100458191 9.548506969  
2.85668 17.64217 2.753065 10.07956 25.65091 2.842993 1.448051 25.532140981  
11.797557016 1.503386 10.158081683 8.224299 5.025890424 1.815202 5.499538  
12.53234 16.91699 21.51429 5.445336 1.281358 3.051596 0.3291957 7.576288093  
1.785562 19.64504 3.304083 2.159228 9.245800725 5.672433 0.4694085 8.414204  
6.945018958 13.54093 1.37569 6.202114 3.183076 10.54061 4.249537 20.61283  
14.895708283 11.771857653 30.094277392 4.282758 5.37569573 2.235783036  
15.64743 6.009687 1.196706414 4.182098 6.457863 3.417943 2.772794129 5.333235 0  
4.359947 1.22028383 0.8944324 18.23986 1.615876 3.474803 4.517221 2.34623  
3.271212 6.999036 57.39575 0.3686737 5.070499 1.45105977 0.6977778 0  
8.365916 5.969804 2.863698 4.892505 5.825 4.105298949 3.824381495  
10.812963115 4.125816 27.51487 5.237843 14.90633 6.930828 0.759800675 7.240587  
27.11524 4.891245 5.645165 0.4153628 2.733983526 0.02830429 46.79808  
8.223107 5.78474 0.5971568 8.030714 22.61979 20.255296054 3.074363 1.551354  
2.949887418 3.79579 5.462341 23.21298 10.00328 9.921932 19.15945411  
16.783381815 7.659506076 1.011302 19.79041 7.785873 1.770886 5.124647 1.110688  
6.019601153 7.752809 1.150511601 0.3684928 12.44095 4.067713 10.19959

0.0499169 13.156945579 5.443208 4.52885 3.094298 7.912245 1.039564 16.87377  
12.27651 16.435368894 13.12976 16.477775699 0.7295849 3.602587 10.57846599  
70.81384 18.55515 1.717098 9.189860939 2.426057 16.63512 24.36753 7.656216211  
5.979995 4.476695 0.5300208 0.09345042 8.046682 6.981921 0  
AC116667.1 0.1198262 1.374796686 0.3537093 0.871632416 0.584493719  
0.485609816 0.484231 0.553860851 0.1382883 0.3172223 0.188823393  
0.3109737 0.8286211 1.173772 0.4005661 0.4694922 0.2672276  
0.171696147 0.1022873 0.2003396 0.288499201 0.8173826 1.155262122  
0.9872255 0.3773847 0.700990602 0.6726095 0.06884468 0.1654504  
0.5368759 0.2949047 0.263125023 0.6679079 0.730785502 0.5118657  
1.073805612 0.932252974 0.783351945 0.876668 1.416204 0.8823149 1.063884  
0.23963052 0.6000245 0.583245563 0.7079119 0.8911966 0.1141517  
0.247224928 0.148809 0.8559599 2.42911 0.654960777 0.5368137 0.314408365  
1.511565 0.1127043 1.426317 0.1465888 0.2453123 0.0932593 1.993342  
0.903607544 0.2889367 0.2098941 0.548341 0.2296054 0.4156543 1.0862  
0.08474962 0.3855244 1.724281819 0.1813005 0.1657824 0.293544794  
0.5229164 0.094889616 0.4874854 0.5738792 1.521704 0.4708328  
0.2450326 0.4770318 0.238429962 0.975230116 0.1329097 0.1497961  
0.5485567 0.38003259 0.4024687 0.08898151 0.2928127 0.615764058  
0.4187174 0.8071649 0.147044287 0.4012335 1.118487605 0.212738744  
0.1641054 0.06591598 0.1529609 0.7119887 0.320855655 0.8619182  
0.1363131 0.2687094 0.582225 2.024855803 0.471996026 0.1465594  
1.106726464 0.4298554 1.252539 1.027703 0.3258149 0.4795728 1.009193403  
1.432041 0.8998598 0.2175659 0.2653934 0.2490663 0.266639 0.8423383  
0.4832464 0.402283 0.8152933 1.138798 1.370648449 0.677370167 0.4093301  
1.097038341 0.873729744 0.2032623 1.237925656 0.7294608 0.02885488  
0.215050293 0.774659593 0.127132692 0.525601744 0.3180418 0.2639821  
0.209497 0.5437877 0.8978326 0.2162576 1.343280827 0.4149283  
1.023151 0.63034549 1.370703 0.5359481 0.201052563 0.9338159 0.5238647  
0.439487874 0.9063652 0.5570384 0.176330733 0.8255714 0.4404836  
0.1201748 0.636469843 0.4467902 0.7165167 0.307894208 0.08198438  
0.482175137 0.5773705 0.1670952 0.200266224 0.3279673 1.188749585  
0.8448261 3.057238 0.2255098 0.4416991 0.2626255 0.559287947  
0.417852 0.1551244 3.830335 0.9269073 0.4113645 0.0446242 1.289594  
0.9076207 1.367595416 0.096407322 1.123526 0.240483 1.643669 0.1227911  
0.985429292 0.5553686 0.896945732 0.4300426 0.5454653 0.303705844  
0.717206883 0.244821 0.4002741 0.593076891 0.2946757 0.2022488  
0.5093283 0.5854224 0.2344685 0.4876452 0.4603962 0.3275936  
0.03272303 0.7246775 1.483577 0.1191824 0.4147583 0.77559776  
0.5412414 0.3253207 0.167261879 0.1714327 0.2137598 2.011828  
0.3389712 0.2237078 0.6349892 0.7340664 0.2244616 0.5328236  
0.0704985 0.2955908 0.147440221 0.1588993 0.8165871 0.1672762  
1.052972312 0.134916542 0.7914422 0.252391 0.6989155 0.965106603  
0.7785095 0.7651269 0.521690269 0.4927413 0.8443002 0.2288227

|             |             |             |             |             |             |             |
|-------------|-------------|-------------|-------------|-------------|-------------|-------------|
| 0.2834672   | 0.2716561   | 0.3485989   | 1.003871625 | 0.8246956   | 0.173085599 |             |
| 0.2174249   | 2.488828    | 1.07019     | 0.214232    | 0.9329675   | 0.2670586   | 0.360546    |
| 0.519867523 | 1.533501    | 1.08483     | 0.253565054 | 0.3684715   | 0.1955633   | 0.4599268   |
| 0.3057773   | 0.4384329   | 0.1807778   | 0.3139942   | 1.037449    | 0.688988198 |             |
| 0.3391105   | 0.352923099 | 0.7146493   | 0.5877887   | 0.5831368   | 1.030858187 |             |
| 0.394694887 | 3.463102    | 0.7699086   | 1.150257    | 0.1763341   | 0.3615514   | 0.342944872 |
| 0.2544562   | 4.168884    | 0.3252749   | 0.53813093  | 0.48314     | 0.07634302  | 0.371988795 |
| 0.1413393   | 0.202763658 | 0.1341612   | 1.098568    | 0.798113824 | 0.2749033   |             |
| 0.4794961   | 5.88747284  | 0.90352822  | 0.1484386   | 0.3325239   | 0.4792731   |             |
| 0.6760895   | 0.6243903   | 1.387342    | 0.5090395   | 0.3257688   | 0.5079946   |             |
| 0.893630461 | 0.1584594   | 0.320999348 | 0.503657    | 0.06281381  | 0.793766    | 0.3040327   |
| 0.426535811 | 0.260483    | 0.1464324   | 0.1347157   | 0.46237977  | 0.1104503   |             |
| 0.1351369   | 0.258857233 | 0.592330461 | 0.05129086  | 0.3337155   | 0.2131806   |             |
| 0.775664447 | 0.35341371  | 1.634145163 | 0.4130385   | 0.2771322   | 1.257895    |             |
| 0.2936876   | 0.3312237   | 0.1931167   | 0.2403986   | 0.3277081   | 0.8379601   |             |
| 0.1059435   | 0.4389707   | 0.2385331   | 0.5193939   | 0.2285934   | 0.9612653   |             |
| 0.5757088   | 3.293414    | 0.2368985   | 0.2892618   | 0.4963282   | 0.1963301   |             |
| 0.3620264   | 0.901943365 | 1.10137     | 0.2127532   | 0.4632023   | 0.3131536   |             |
| 1.258961692 | 0.4097467   | 2.275737    | 0.7555601   | 0.06518604  | 1.333849    | 0.2488727   |
| 0.4267066   | 0.480024433 | 0.1295839   | 0.3720193   | 0.175453625 | 0.2244155   |             |
| 1.855644    | 1.259051    | 0.2765088   | 0.5933143   | 0.122182699 | 0.47286502  | 0.6209192   |
| 0.8739715   | 0.3637397   | 0.095654081 | 0.785941972 | 0.260962573 | 0.193573    |             |
| 0.2528076   | 0.4270101   | 0.9054111   | 1.28572     | 0.05498341  | 0.214707    | 1.914210288 |
| 1.734978073 | 0.2500489   | 0.946047998 | 3.443005    | 0.203502349 | 1.141844    | 1.264513    |
| 0.3304952   | 1.721289    | 0.8519851   | 0.1818652   | 1.092925    | 0.2574544   | 0.1140689   |
| 0.747184632 | 1.732392    | 0.6370475   | 0.2968235   | 0.2992757   | 0.746503115 |             |
| 0.2367105   | 0.2365872   | 1.214576    | 0.550057964 | 0.6601477   | 0.0778265   |             |
| 0.3890308   | 0.3529475   | 0.6386719   | 0.2988951   | 0.8004533   | 0.845092039 |             |
| 1.183465789 | 1.773367999 | 0.136657    | 0.319323561 | 0.101753792 | 0.5637686   | 1.61544     |
| 0.858182815 | 0.5146442   | 0.2546976   | 0.1800986   | 1.231923367 | 0.1486666   |             |
| 0.04810506  | 0.2417209   | 0.34954602  | 0.1577815   | 0.1856299   | 0.2394113   |             |
| 0.1742025   | 0.2675645   | 0.9424013   | 0.2772861   | 0.1426601   | 1.090407    |             |
| 0.5535761   | 0.6187216   | 0.17369579  | 0.1217882   | 0.5910815   | 0.6121003   |             |
| 0.4672566   | 0.09467757  | 0.209804    | 0.2036592   | 0.133101129 | 0.189017667 |             |
| 0.247406201 | 0.2968387   | 1.041186    | 0.2432608   | 0.7767159   | 0.8409595   |             |
| 1.569130317 | 0.3916363   | 0.7789134   | 0.24765     | 0.184103    | 0.2549555   | 0.404629461 |
| 0.1490764   | 0.9399175   | 0.2423603   | 0.3986767   | 0.5131604   | 1.835081    |             |
| 0.4404311   | 0.456767275 | 0.2234008   | 1.208775    | 0.183758948 | 0.1277257   |             |
| 0.5425866   | 1.692286    | 0.9197479   | 0.3354173   | 0.589068878 | 0.834795679 |             |
| 0.303323313 | 0.08410179  | 1.501152    | 0.1606496   | 0.16604     | 0.5174986   | 0.1877376   |
| 0.341540898 | 0.6907909   | 0.183997524 | 0.03064456  | 0.3668839   | 0.6652814   |             |
| 0.4872447   | 0.2698269   | 0.74927124  | 0.7062896   | 0.3466473   | 0.6619661   |             |
| 0.4604306   | 0.1487348   | 1.238165    | 0.4776315   | 0.765524813 | 0.6749591   |             |
| 0.203917094 | 0.0404491   | 0.1705029   | 0.734998629 | 2.333287    | 0.2301613   |             |

0.2444274 0.360894016 0.2591998 1.326276 0.919025 0.353725203 0.1673631  
0.1932655 0.05877004 0.1036202 0.1944093 0.7023088 0.1776463  
NR2F2-AS1 0.1720866 2.039704185 0.7650401 1.893190515 1.053504217  
0.85846308 0.6978525 1.14090385 0.573986 0.7730954 0.569992233  
0.6062935 1.421069 0.8883424 1.064485 1.25384 0.7675498 0.669498866  
0.890664 0.5056803 0.964008981 1.276468 1.694692245 1.501347 0.7149353  
1.2732179 1.485526 0.5368954 0.5544211 0.9479901 0.4856878  
0.979984022 1.151542 0.590287196 1.517034 1.962710505 1.318555533 1.354544303  
2.282179 1.853227 0.874152419 1.841453 0.754330897 0.09469754 1.262300984  
1.751376 0.8583856 1.327229 0.641377645 1.039158 1.385403 1.537481 1.396666318  
1.49572 0.957796882 1.625617 0.5282097 2.340466 0.7347947 0.8692354  
0.6737232 1.380093 0.921738045 1.21874 0.7060153 0.8090155 0.6167944  
1.3863 2.29802 1.342519 1.669384 2.374761875 0.512854 0.4166502 1.058585879  
1.023577 0.466636195 1.019051 1.099931 0.02207447 1.341783 0.8086589  
1.269642 0.752488577 2.505710361 0.6984336 0.230447 1.914385 0.789348425  
1.338657 0.7386618 0.6065661 1.88982954 1.095821 1.113884 0.384708176  
1.595776 1.239018552 0.850599709 0.6898921 0.765919733 0.6856444  
0.4596909 0.635334416 1.389328 1.058905 0.395647962 1.985216 1.938644016  
0.815575053 0.3795002 0.990204129 1.09706 1.188308 0.5746839 0.8899821  
0.7930844 0.966225224 1.216696 2.419565 0.7450574 1.175971 1.009357  
1.051566 1.004216 0.501322 0.3520508 1.671875 1.207539 1.573493045 1.348156187  
0.8448799 1.492741741 1.761650459 1.243178 1.82811021 1.360711 0.4102092  
0.723607333 1.884159507 0.405635584 1.01234957 0.6048069 1.061519  
2.167518 0.6061526 1.661009 0.8850778 1.359632929 1.060782 1.574152  
0.361007169 1.256419 1.130932 0.421383358 2.238474 1.284421 0.827641867  
1.367609 1.578885 0.394699166 1.539471 0.7913567 0.6887144 1.037577689  
1.342023 1.024441 0.697126859 0.4822151 1.475549327 1.120907 0.7397901  
0.778578732 0.9186865 2.920119606 1.175952 2.834417 0.7276909 1.069115  
0.5867022 0.814351468 0.7014612 0.4973161 4.185577 1.654892 0.8067211  
0.3171952 2.166939 1.650578 2.279452124 0.30674302 2.247848 0.952373  
2.390096 0.7481285 1.737868934 0.7382598 1.619644543 1.91429 0.7171445  
0.706987328 2.329534033 0.2774412 0.9279135 1.120777498 0.5802887  
1.224539 0.6899037 1.469693 0.7448839 1.432482 0.7199636 1.03389  
0.09569826 1.908013 0.3928479 0.4434653 1.330705 1.402562485 1.948801  
1.193377 0.184707406 0.5717193 0.7796149 1.742355 1.159203 0.8246048  
1.205493938 1.112226 0.7681218 1.268098 0.1753897 1.182359 0.460382881  
0.5359263 0.6499878 0.7740785 1.999050307 0.550743431 1.48938  
0.9181219 1.012032 1.820454774 0.9790492 0.8978057 1.018682828  
1.224866 1.869428 0.6595385 1.292975 0.8809496 0.7536441 1.804902828  
1.267574 0.858711095 1.350848 2.734263 1.663428 0.6906949 1.177459 0.9050778  
1.221912 0.067540007 1.136651 1.546631 0.470943533 0.8003855 0.7518822  
0.6833919 0.9863958 0.3634125 3.469485 1.697078 2.434518 1.943172308  
0.7018651 0.908970262 1.41723 2.072331 2.042902 1.744943099 1.755471098  
7.865183 1.369305 1.441195 0.1534785 0.6352324 0.688080119 1.077276 9.51842

0.3103082 0.855652057 1.553847 0.8314281 0.766581094 1.009145 0.951966825  
0.213433 2.594958 1.641938093 0.8005044 1.354863 3.89233811 1.776587951  
0.6330737 0.8127422 1.611443 0.970457 0.7751095 1.084929 1.918081  
0.8132877 0.9285167 1.372616451 0.6305558 1.03706249 0.1753502  
0.612328451 1.937314 0.8981228 0.825344359 0.6238722 0.6970062  
0.2154551 0.674100918 0.6821163 0.5763435 0.628390823 1.40834649  
0.1041665 0.8287608 0.957481 1.100712606 1.454536521 1.063364783  
0.5293363 0.935159 0.5279623 0.5927217 0.7644107 1.269917 0.58587  
0.6068689 1.367527 0.3378019 1.029923 1.137000604 1.348258 0.5222811  
2.733754 0.93005 18.48716 3.472058 0.8196747 0.778302 1.883982 0.7302707  
2.073470887 1.585022 0.405075 1.921413 0.8656435 1.462956114 0.3825223  
1.092991 1.251952 0.6329714 2.135871 0.8989524 0.9883034 1.47887542  
0.3490487 0.902281 0.607985298 0.7554302 1.741893 1.333295 0.8596839  
1.769611 1.044258253 0.527329843 0.7912478 2.459236 0.2434412 0.407953692  
1.502707992 0.446704437 0.3216494 1.086163 1.918019 1.895148 1.372565  
0.7704932 0.7422295 1.525121832 1.029005166 0.8524183 1.29180972  
13.02569 0.772539006 0.7929693 1.213246 1.540643 2.283256 1.805012 0.9141405  
1.143104 0.5490068 0.7471108 0.615184712 2.341875 1.051717 0.6923797  
0.9522176 1.914040308 1.0559 0.3603634 1.586775 0.619065959 1.206623  
0.9317499 0.6957816 1.2096 1.267082 0.8676892 0.8665905 1.665241198  
1.972282233 2.286463758 0.671291 0.931501232 0.293069475 0.8797472  
1.257211 1.353296292 0.6832241 0.762596 0.4818514 0.724912515 0.6919151  
0.7656961 0.6163654 0.446545119 0.7038192 0.6004998 0.6422808  
0.4526398 0.8770415 0.9340472 0.7488236 0.5149915 2.071044  
0.8016813 1.768062 0.470653966 0.1833222 0.05626997 1.284259 1.310738  
0.5724042 1.020335 0.6713793 0.519004395 0.543267374 0.89572571  
0.973424 1.51952 0.8498995 1.017443 1.79921 1.658603644 1.267626 1.963525  
0.4168213 0.8739779 0.3883414 0.700453493 0.6620861 1.553561 1.24316  
0.8987355 0.345431 1.468598 1.454692 0.926516373 0.9779847 1.341933  
0.780911882 0.5577055 1.118595 1.717045 1.80867 0.8736368 2.266289976  
1.801863134 0.650837092 0.5608004 1.837526 0.8553764 0.3958555  
0.9087944 0.6359681 1.979831493 1.347393 0.168156075 0.6534777  
1.360346 0.2267131 0.9846661 0.2508112 1.869668764 0.9535514  
0.793433 1.201426 1.18076 0.2888498 1.287774 1.259511 1.292818276 1.905201  
0.944227292 0.1872974 0.4081086 1.329586526 2.240565 1.36572 0.9523178  
1.685759379 0.5719355 2.200408 2.763273 0.530277673 0.723496 0.6228394  
0.1745581 0.8075711 1.352796 0.9329111 0.5108665  
AC020907.4 0.6611919 1.584589551 0.3726052 1.232212169 0.769648217  
1.110946456 0.425083 0.524795608 0.1213966 0.0718643 0.2712419  
1.283047 0.5388196 2.543795 1.67589 2.555296 0.8042956 0.211013259  
0.5387584 1.07196 0.379889276 2.809738 0.99854654 2.866046 1.69785  
0.743083229 0.4620924 0.2417417 0.03227576 1.466259 0.4854049  
0.327849325 1.297398 2.060644187 0.5483498 1.582707713 2.133633227  
2.383911731 1.461433 1.939106 1.423481941 2.603689 0.124657815 0.4823093

1.100424606 1.20522 2.623135 0.3340275 0.224027691 0.04019454 2.299955  
4.351245 1.581135707 1.011448 0.142453637 3.779739 0.2130965 1.536313  
0.1169848 1.13341 0.2806897 2.02463 1.922990131 0.1951105 0.2149652  
1.019355 0.1710202 1.308545 2.042189 0.4463856 0.3867809 4.869128131  
0.06063047 0.07276616 0.61288147 0.5274112 0.21419746 1.23955  
0.1959148 1.781108 0.1066636 0.1912021 1.204863 0.401867807 2.027622852  
0.1555667 0.0525995 0.7364904 0.970508391 0.6633535 0.2083002  
0.02570461 2.065383287 1.225239 0.8502853 0.911174673 0.1174078  
4.10598617 0.124502047 0.1536642 0.066130806 0.268554 1.231384 0.688511232  
2.174411 0.2735148 0.196572505 0.8621085 2.890916741 1.521520069  
0.08577164 3.794367664 0.4695902 4.398174 2.81774 0.305085 1.593762  
0.759361848 1.153321 2.304002 0.3688094 0.1129581 0.5035421 0.9615827  
1.649538 0.5044762 0.8475475 1.404906 0.6920971 2.229134644 2.151996312  
0.3519978 3.723743006 1.486566683 0.1098056 2.028534957 0.807027  
0.1013212 0.446212633 1.46801476 0.281946066 0.952568548 0.5753078  
0.6488641 1.28054 1.171714 2.660053 1.122545 1.44547265 0.7713435  
2.385069 1.505111638 1.031378 1.514726 0.197673657 1.773889 0.4747102  
0.87682996 0.895111 1.020516 0.323044665 1.376253 3.648666 0.1318695  
1.90268902 1.317844 1.677321 0.087660148 0.06643397 1.154395279 1.477584  
0.1173478 0.602756735 0.4775037 2.9219284 0.5020279 6.23418  
0.2346241 0.5921944 0.184437 1.098445564 0.3121805 0.2593833  
5.085521 2.719157 0.1805585 0.1566937 1.868818 2.51099 1.621119407  
0.037613925 3.945156 0.2702188 4.270976 0.2351833 1.57711763 0.6648154  
2.510504 0.7704359 1.159291 0.201214109 2.07598263 0.3094798 0.0685622  
0.95302415 0.6282266 0.4438612 0.7984191 1.436483 0.3998955  
0.8255832 1.670526 0.04601258 0.09192309 1.890302 6.411621 0.1195709  
0.06197384 0.782264475 1.953311 1.094736 0.293662253 0.2851437 0.5420983  
2.256153 0.806309 0.2880274 1.712672281 3.968156 0.3678155 0.6626319 0  
0.7671728 0.258861301 0.2391258 0.7862143 0.3076726 1.952234689  
0.284248121 1.613657 0.1824627 2.262942 1.198089572 1.752349 1.542349  
0.51052025 0.7266904 1.193104 0.03090344 3.47034 0.3077081 1.224072  
2.073530408 0.9543115 0.086824851 0.3214598 4.468505 1.622718 0.271648  
1.820016 0.4688757 0.1978162 1.369099784 3.052499 1.574502 0.086164845  
3.06587 0.118397 0.5273437 0.786108 0.5370405 0.2777182 0.3556649  
4.325949 2.419317874 0.3151999 0.366143991 1.131701 1.678692 0.8531794  
1.888571736 2.059102431 0.4943236 1.272217 1.986937 0 0.7085884  
0.20762396 0.1832819 1.941861 0.1502858 1.198280791 0.1946805  
0.03350893 0.358565804 0.0930562 0.544459649 0.4187506 1.377685  
1.710618313 1.447946 1.439691 0 2.472198839 0.1158285 0.1086164  
1.714088 1.93141 0.9318075 2.703102 1.830003 3.627021 0.2378368 1.585465323  
0.03477596 0.148310435 0.6857623 0.063018526 1.541177 0.2264569  
0.832078204 1.640083 0.09640947 0.1971006 0.115971678 0.3525782  
0.09490414 0.255643048 0.862403048 1.140653 0.1783191 0.2495212  
2.068612745 2.076740905 2.888591766 0.1000239 0.2994227 0 0.2148451

0.1762214 0.3507472 0.2813791 0.2422561 0.9983207 0.3472101  
0.1892953 0.246349047 0.8733705 0.4013423 1.306604 0.6432197  
2.021769 0.3697098 0.2683023 0.3428479 1.060608 0.893291 1.828423153  
2.75605 0.3268401 1.762033 0.4683523 3.279894005 0.09282499 7.847056  
2.653079 0.2288947 4.203307 0.06242096 0.264413 1.462939805 0.1197426  
0.2009709 0.154022265 0.1576028 1.136498 2.666659 0.5425812 1.308161  
0.548209047 1.156364951 1.228338 1.332535 2.206138 0.083970099 2.069821515  
1.745420507 0.5561293 0.2142749 0.6699474 1.02557 1.923649 0.1608909  
0.1966757 4.687864976 2.264362681 0 1.094292513 4.492827 0.384773599  
1.664953 1.618398 0.3238614 3.236236 2.350595 0.9579042 2.718374 0.1291467  
0.4405965 1.382744595 3.530389 0.1082387 0.5360236 0.622743 1.223262202  
0.4353836 0.3323016 1.697461 0.912086502 0.5390807 0.3006085  
0.1762639 0.3442617 1.429681 0.3292682 0.3459344 1.5400752  
4.125073769 3.595882784 0.3299025 0.475692398 0.032481724 0.9292099  
0.1329485 1.494053039 0.9130738 0.1533166 0.4949213 2.218350842  
0.05800319 0.04222911 0.1571816 0.316747945 0.1582957 0.3103915  
0.1084736 2.05098 0.1879056 1.211803 0.3420983 1.302437 2.796735  
1.196204 2.361504 0.22470611 0.4276481 0.8648032 0.6357183 0.8887277  
0.1790123 0.2104878 0.1787826 0.046737221 0.115429205 0.367545466  
0.06131303 1.74299 0.02669337 1.363683 1.703626 2.588522452 0.240659  
3.555607 0.3261 0.9158189 0.2021538 0.202974094 0.3030604 3.398465  
0.8050243 0.5288572 1.01721 3.617989 1.790722 2.11244804 0.2033762  
1.101938 0.612989806 0.08542801 1.240623 2.348169 1.976328 0.795006 1.40121517  
2.359344869 0.277849971 0.09843854 2.228261 0.09810543 0.3802395  
0.605716 0.316427 0.856635034 0.4379642 0.086145355 0.07173701 0.8465831  
0.5939171 1.421746 0.1700591 2.514922799 0.5072871 0.0986935  
1.375016 0.7348905 0.5549101 2.678888 0.7075513 1.51366996 1.320031  
0.548960842 0.02840665 0 1.117494093 6.233894 0.562219 0.0903457  
1.068462075 0.2459881 2.328548 2.549386 0.621036549 0.2238781 0.4643284  
0 0.2425684 0.4670764 2.294039 0.6237883  
AC011462.4 0.3520823 1.683652046 0.3273781 1.490092336 2.053728463  
0.968532178 1.072575 0.904108771 0.2133228 0.3788481 0.600209124  
1.790904 0.5996618 2.301041 1.647763 3.669464 1.845193 0.600343799 0.7714072  
0.5101659 0.29669155 0.7786549 4.459822425 3.197667 1.552404 1.849846948  
1.022527 0.6230367 0.3402972 3.149136 1.213116 0.45390437 1.402977  
2.231837764 0.4282583 2.999327534 2.568015097 2.148256931 1.712058  
3.663948 0.752053999 3.713289 0.182544572 1.843755 1.647232973 4.809305  
5.175549 4.304416 0.393670041 0.4708759 1.377808 11.84904 2.567944943  
1.238763 0.417208312 3.485821 0.2853038 4.139491 0.1370467 1.487114  
0.1644129 4.269308 4.787131891 0.6857111 0.6835386 2.078734 0.1717275  
2.564744 1.864672 0.08715621 0.6230274 3.248882958 0.2841125 0.1278675  
1.403336007 1.029763 0.808554331 3.353713 0.6229629 2.921175 0.2499111  
0.5039814 1.893458 0.078464167 7.178818526 0.8201032 0.1540497  
4.911282 0.568471507 0.6081758 0.3050276 0.1806765 3.440340912

1.539748 1.16212 1.529988771 0.2292373 3.346177942 0.401096238 0.3600328  
0.309886896 0.2247206 1.092846 1.026563415 1.789999 1.001314 0.690849473  
2.452744 3.569750558 0.541100559 0.2009616 2.688551698 0.6680044  
6.624548 2.953491 0.3574046 1.585257 2.026280328 1.837505 4.087239 0.8949759  
0.3969885 0.3415185 1.571152 2.132327 0.3760845 1.113246 2.515334  
3.513408 4.332572994 1.724926829 1.168361 5.114462785 1.556235188 0.7396596  
1.988427111 2.014168 0.03956567 0.442313911 3.692442732 0.302772817  
1.848253479 1.466873 1.303096 3.127956 2.541952 4.693583 0.8509163 1.366571181  
0.7028178 2.511144 1.296490111 1.157907 0.7528137 0.264655027 2.046611  
0.4866044 0.986111484 1.281641 3.088443 0.409981333 1.440752 1.719046  
0.3398651 1.450609517 2.426041 1.689873 0.308079541 0.1037692 3.200597334  
2.415318 0.5040643 0.980728911 1.382027 5.201206653 3.635662 5.878999  
0.1030726 0.6276795 0.5041553 1.871738786 0.2925736 0.3950252  
3.919505 2.461501 0.3701651 0.09178274 2.399816 2.413625 1.755798277  
0.176257682 2.123493 0.8309679 2.839776 0.9643041 1.599398486 1.609574  
3.850083316 1.841222 4.960019 0.23572076 1.275801951 0.1611347 0.2811203  
0.620255757 1.039006 0.727972 1.83327 2.698328 1.047178 2.973135 1.010069  
0.5929372 0.1076872 2.299646 13.0037 0.2101145 0.1452037 1.32371306  
4.947651 1.059436 0.860057601 0.7423193 1.074724 2.946368 3.91328 0.7975425  
4.3156146 4.092414 0.8925641 1.735187 0 1.215938 0.303253996 1.353981  
2.058804 0.5898044 2.079116109 0.44399261 2.966856 0.2748261 2.426989  
1.323349589 1.601233 3.176558 0.457348025 1.094544 3.007198 0.1810157  
3.813353 0.1802388 1.295218 1.821843533 0.7710128 0.305143908 0.6354917  
5.88338 1.65087 0.342713 1.462035 0.3021063 1.158701 1.446645634 3.294722  
7.318567 0.067294296 3.789348 0.02774022 1.351392 1.347687 1.426048 1.115468  
0.7499856 8.435246 2.651359641 0.1230847 0.461929819 1.383422 1.773141  
0.8395741 2.359943538 1.484444583 4.169493 3.725982 2.213206 2.383344  
0.8301058 0.340521792 0.2683916 6.649636 0.3873291 2.051673501  
0.3258095 0.03925545 0.900122238 0.181691 0.735957963 0.2759417  
3.622416 2.558267259 3.592075 1.572242 9.27521784 2.413468057 0.1356922  
0.5725948 3.943062 2.026941 1.316348 3.827834 2.816898 3.137743 0.5572479  
1.006070145 0.1222193 0.451735748 0.8456475 0.479867127 1.959135  
0.03789893 1.917053822 1.884396 0.2635335 0.3232626 0.860446138  
0.4130426 0.1482393 0.066551964 2.852607385 0.949452 0.5670126  
0.5171677 2.827257657 2.937264541 5.761882498 0.8202403 0.3946178  
0.3449639 0.05033788 0.206442 0.5478634 0.2472251 0.4257017  
3.262359 0.3195923 0.443516 0.461753582 0.6319436 3.038017 1.734767  
0.9329381 5.873845 1.191058 0.5163732 0.3347031 3.044109 1.89172  
3.212975206 2.707934 0.4922879 0.9209541 0.4055395 3.84237026  
1.413669 5.692767 1.917122 0.06703709 3.446899 0.4021912 0.4388235  
2.049135691 0.112222 0.3531538 0.180435883 1.15394 0.7988391 2.712921  
0.6356297 2.100093 0.307149951 1.180996561 2.050558 3.878985 3.786027  
0.245925791 1.446359863 1.942509192 0.4705286 1.183387 0.597972 1.441737  
2.391512 0.301572 0.2688048 2.786279501 6.6948672 0.6367508 2.930183197



7.464334 0.386365091 2.905816 2.382079 1.011736 2.508899 2.139241 0.6234319  
3.259484 0.5547461 1.360773 1.162986831 3.626799 0.3804023 0.5232895  
1.003116 6.039248995 0.6491526 0.4866109 1.640564 0.56567765 0.8209875  
0.5762628 0.4129836 0.3226399 2.331668 0.3857351 3.495363 3.960408494  
7.481413177 4.058431017 0.3162094 0.716489918 0.152208346 1.325206  
0.3114962 1.483280923 1.76048 0.2394789 0.6120073 2.382215659  
0.475652 0.2968265 0.2209644 0.139150406 0.4636054 0.909053 0.127076  
3.66729 0.8364938 3.385242 0.554906 0.5575021 6.552706 2.102015 1.300247  
0.338453301 0.6778051 1.620976 1.702261 1.9221 0.3894643 0.3698772  
0.1795221 0.082128436 0.642315968 0.587149975 0.1077416 1.494073  
0.2501686 2.364365 1.277302 2.512588067 0.4027574 5.326861 0.2546824  
0.1262205 1.319434 0.079260856 1.065099 5.014876 1.508927 0.8017733  
1.429984 4.764384 4.672411 1.649810942 0.6466885 0.4781154 0.491340323  
0.2501956 1.661006 1.880691 3.529349 2.242123 2.032348993 2.219538917  
0.867997535 0.23064 3.901551 0.2585919 0.5939302 0.8765543 0.5869287  
1.445099421 0.7104069 0.302755837 0.08403935 0.905525 0.6957692  
4.432094 0.1423021 2.946212455 1.452691 0.5780933 0.5752931 0.7231715  
2.103177 3.446981 2.455973 1.803825879 2.108736 0.643103347 0.2995035 0  
1.776684055 7.970658 2.140564 1.270071 1.135258248 0.3458077 2.266235  
2.684146 0.804122579 0.4261912 0.5021142 0.03021945 0.2486461  
0.9680812 3.224939 0.8476852  
AC048341.2 1.642023 4.421509954 0.9979142 1.745870024 3.847718579 1.217815791  
1.191005 0.727558977 0 0.153974 0.742585314 2.895238 0.8658425 4.346402  
1.570934 2.82575 1.077035 0.742751936 0.5771628 1.184259 0.949594238  
1.650659 5.281772269 4.561657 2.040693 1.492598442 1.182576 0.5179475  
2.109165 4.562737 1.005345 0.92594216 2.218463 6.206084137 0.5548024  
3.665332628 3.694733899 2.946743469 2.365068 3.417545 2.720993035 3.3047  
0.100157857 1.55007 1.801045704 4.155831 15.33241 14.09882 0.209997444  
0.04305973 2.155915 26.23975 4.196113433 2.117842 0.495976562 3.273798  
0.8479218 6.319972 0.4261009 1.165635 0.5011636 4.337903 6.077197121  
0.6688593 0.06579673 2.952493 0.497287 2.803645 4.053796 0.8767098 1.03588  
2.880257659 0.2922858 0.07795316 2.089084957 0.8370469 0.662902118  
3.319773 1.019418 7.686799 0.3428007 0.1536236 1.448157 0.574018918  
5.792421561 2.999807 0.4507916 2.913193 1.819456158 0.7724341 0.4741905  
0.4130538 2.59290258 2.100125 3.552496 3.741816425 2.012432 7.841113765  
0.766917395 0.5761625 0.247956852 0.6164943 2.558372 0.871697797  
2.581238 1.098794 0.589637446 2.427649 5.649914619 1.600871966 0.2450286  
9.768733044 0.6827298 20.19295 11.96847 0.5719566 2.319447 3.163578098  
8.302783 4.066716 0.4797634 0.3932827 0.3406965 1.192779 2.406943  
4.077842 3.769423 4.571949 8.485277 4.179059959 1.868585157 1.508357 8.849566742  
4.811484972 0.5293482 3.814074039 1.917055 0.6512623 0.441249278  
4.625468814 0.855791488 2.359838224 1.957715 2.250855 1.838823 4.556047  
6.684411 0.7073902 3.58602412 1.193584 4.883769 4.315542928 6.0309  
0.7375909 0.54453715 2.620163 0.8581765 1.690799605 1.438376 6.195147

1.845718876 2.603652 3.143998 0.5933323 4.335471274 1.848765 3.198457  
0.156514725 0.1660624 0.577119269 4.454237 0.5866595 0.968584651  
1.203627 9.390637506 5.427032 8.562982 0.157093 1.570915 1.745328 4.065123112  
0.5016505 0.3612349 3.225809 3.972255 1.837578 0.2797722 6.275604  
1.413964 3.112913068 0.241770975 7.538946 1.121738 18.13682 1.679653 2.294747621  
4.605596 2.958406547 1.881809 4.535741 0.732894731 0.984377994 0.9577835  
1.028293 2.420050161 1.068896 1.363103 3.352905 3.343083 1.486804 1.801624  
3.406026 0.6408025 0.7385674 4.089041 10.13128 0.288212 0.3983492  
2.234737888 3.082268 1.427723 1.45500376 2.036464 1.407179 3.764147 2.015499  
0.8415242 4.777291454 5.559025 0.6191972 1.962572 0.3093941 1.498684  
0.242649519 3.202143 6.837154 0.5693168 2.503337662 0.203006804 2.80911  
0.307166 2.185241 1.540191726 2.703256 2.15864 3.024100066 2.96568 3.021086  
0.099319 2.046185 0.4944637 1.269027 2.776672594 1.16335 0.232534988  
1.528162 7.625363 4.208736 0.7834935 4.010919 0.9292524 1.525803 3.019662995  
4.004942 6.420484 0.246151846 1.928464 0.2536733 1.76542 0.9653848 2.30129  
1.615081 0.8763409 3.780627 1.797520914 0.3001496 0.603452106 1.950338  
1.238211 0.4021585 2.832472966 2.375564828 8.261144 2.086948 2.686887  
3.600869 0.4744367 0.622787309 0.7363005 8.0811 0.3541971 3.258617886  
0.08938195 0.1076926 2.03037756 0.3987581 0.807605195 0.7009382  
3.214163 2.573377188 1.4295 0.9149334 0 2.604284411 0.3722554  
0.6399742 2.203528 2.888101 3.288286 4.486879 3.624555 7.203242 0.9342319  
4.74159614 0.07450979 0.603753355 2.08794 0.978904882 4.566698 0.4505419  
1.396513059 5.237193 0.6885456 1.097983 1.697926139 0.6798798 0.2711179  
0.091288692 2.554250409 1.061178 1.419082 1.007545 15.253947574 0.922468689  
12.670721046 1.23227 0.2806707 2.208191 0.7365119 0.7551319 0.7013991  
0.3767958 0.5514903 1.857525 0.3985289 0.550427 1.213984023 1.210812  
3.373463 1.563046 0.3937545 17.15382 3.465559 1.10865 0.4285017 1.533885  
5.631386 4.582096515 3.381099 0.9003554 1.742433 0.5017379 16.193550886  
3.579907 28.76692 3.240638 0.3984679 3.923983 0.3009173 0.708153 1.43094245  
0.282212 0.4844177 1.292511347 0.5487209 4.870044 4.473063 0.6424432  
1.583075 1.200108391 4.669301306 2.763385 3.157853 4.934113 0.044977874  
4.395828464 2.664521264 1.423233 1.672429 0.5468216 1.391656 2.565452  
0.3447195 0.5618543 3.544962709 14.496884267 0.4927013 3.558758964  
14.35176 1.707691732 7.534952 4.00099 0.6360699 4.945466 2.64302 1.277032  
3.528838 0.2305879 0.4290942 4.06410942 4.305714 1.391451 0.4785275  
1.584443 2.012492325 0.7208295 0.7564768 2.454923 1.063317809 1.328269  
0.380589 0.4720714 0.4056819 1.95203 1.036172 6.717011 4.547165552  
7.201531818 3.194514317 0.6104509 1.237602974 0.313174096 2.769939  
1.709105 2.197370423 4.197939 0.4653622 0.6480232 3.010210226 0.4971027  
1.040505 0.3030947 0.678653438 0.7207128 0.7647895 0.4938753  
2.736838 0.5233802 2.696228 0.6202038 1.207453 4.066128 2.274614 1.593799  
0.343891225 1.53609 5.141792 1.264778 1.86754 1.287618 0.394611 0.3283316  
0.125171988 0.370972069 0.501130311 0.2955763 3.916641 0.4003461  
3.447701 1.630392 8.952958829 0.847103 4.321819 0.4890835 0.4039829

1.763449 0.26576332 2.921972 4.200829 1.182732 2.099589 4.35888 6.76159  
8.589068 2.053490073 0.5291214 1.880036 0.449311212 0.1372764 2.658117  
2.002176 3.382367 1.419461 2.001464166 5.476306929 0.992186591 0.4218222  
2.387098 0.6305921 0.6517507 1.755829 1.214689 1.982229043 0.8300942  
0.830574567 0.3842532 1.656133 2.799515 2.658958 0.650648 3.10868571  
3.200305 1.550687 1.157382 1.889462 3.287046 3.763734 1.600196 3.438844691  
2.410444 1.048338751 0.3651788 0.04581304 2.109268747 7.327012 3.124409  
0.4355362 1.437436497 0.7378641 4.029632 2.316261 1.295595811 1.019307  
0.4208999 0.2210759 1.20185 1.693563 4.822972 0.9088253  
AC116366.1 0.2246248 0.857450759 0.5035498 0.902457145 0.518555358  
0.958202574 0.8253921 0.857599283 0.21399 0.2432212 0.484502511  
1.766991 0.3077339 2.324888 0.6583533 1.18565 0.3449882 0.544124882  
0.282796 0.4298797 0.593750982 0.9032245 1.337731116 1.10857 0.8817985  
1.224717705 0.8652292 0.1363604 0.0364119 1.476929 0.2144804  
0.756538487 1.386255 1.058184413 0.794756 2.012005636 1.541506714 2.161133308  
1.284771 2.500747 1.381547478 2.933361 0.435082509 0.4653635 0.754349754  
0.6161001 1.700294 0.1224708 0.446238536 0.1983864 1.326833 1.946476  
1.028701612 0.5770159 0.401772723 2.506301 0.528032 1.421217 0.1781681  
0.3260574 0.4947815 1.162437 1.945699974 0.467742 0.2858189 0.6335569  
0.4134352 0.8694175 2.714701 0.4144126 0.6272487 1.934529182  
0.2394009 0.118006 1.532128987 0.7878227 0.087261378 1.111227 0.2920638  
0.1363492 0.5114133 0.2426677 1.947728 0.363638292 1.474142817  
0.2138938 0.3634583 0.291604 1.107709786 0.5165327 0.400224 0.239239  
1.278803796 0.9707191 1.143106 0.749540917 1.103781 0.54125886 0.359921065  
0.3304604 0.163199483 0.2109964 0.6893307 0.070613094 1.545595  
0.8823051 0.959126265 0.8128055 3.310970023 1.023005178 0.3467351  
2.757372855 0.64329 1.404367 0.3903831 0.3119146 0.954129 1.677653583  
0.5659869 1.120157 0.2006063 0.1911505 0.482113 1.784226 0.5935714  
0.7954814 0.6772806 1.685872 2.591787 2.436211093 2.101941977 0.4839734  
0.983841108 1.396071905 0.3793741 1.43030749 0.8609668 0.1285937  
0.246857086 1.363880863 0.742180815 2.094709091 0.4533691 0.7930175  
0.6454778 1.266792 1.199449 0.8613376 0.740256588 0.7614173 1.796649  
1.261008687 2.375579 0.7702717 0.565478391 1.747272 0.6275911 0.524273793  
0.9396932 0.4437283 0.584627124 1.610431 1.124137 0.275222 1.081777369  
1.084071 1.930115 0.259596246 0.2529478 1.953496783 0.5863352 0.4412866  
0.425000057 0.6337598 1.359219115 0.9332114 3.655164 0.3474073  
0.5050398 0.4204802 0.779201177 0.5282797 0.3328591 3.227193  
2.660926 0.178235 0.07365585 1.576163 1.121306 1.496737096 0.058346963 2.2404  
1.38134 0.6836781 0.2100467 1.195002179 1.26877 1.988994673 1.27333  
1.108833 0.476699421 0.988639625 0.4024804 0.3722394 1.632641749  
1.297608 0.2712353 0.2386952 1.955858 1.220737 1.358265 1.310864 0.1167955  
0.4018493 2.09666 3.497965 0.4636977 0.266554 1.814051975 1.105536  
0.5101197 0.781649401 0.437849 0.6056878 0.8553807 1.191192 0.5427944  
1.727088218 1.401353 0.7669186 0.7420515 0.02909087 0.6936616

0.355916939 0.1686061 0.4239184 0.3431565 1.284741399 0.280590236  
1.858373 0.5403441 1.6675 1.448169547 2.174603 1.185726 0.758043268  
1.317561 1.152258 0.2919837 0.3034933 0.3775158 0.601376 2.86558567  
1.201901 0.367318002 0.6148135 5.147097 1.379024 0.4302222 0.6379745  
0.5421862 0.4742285 0.99184345 1.48968 1.103009 0.105307455 0.6663669  
0.2871745 1.268859 0.7949185 0.4241036 0.621021 0.3711502 2.648858  
1.56277515 0.08889819 0.595767394 1.741625 1.404839 0.5390081 1.726667637  
0.820859549 5.507003 0.8858198 2.278311 0.1372111 0.4621497 0.327923398  
0.4264621 13.23906 0.6061233 0.656422616 0.4392576 0.3213263  
0.505645075 0.2449565 0.673293017 0.191918 2.642201 0.764748159 1.101011  
0.8396222 4.40400163 1.353832642 0.2940119 0.4786548 1.32286 1.87251  
1.661853 3.338537 1.845463 0.7121348 0.6148899 1.4206669 0.15693  
0.250974656 0.6158604 0.164405704 1.19303 0.3375952 0.465443281  
0.8094889 0.2673791 0.1723283 0.468819912 0.4822853 0.5219473  
0.240336449 1.995917 0.1523875 0.5568117 1.15847 0.821658898 1.81787141  
3.92483037 0.5642097 0.4855786 0.2699135 0.4120419 0.4075485  
0.2341198 0.5505563 0.4740068 1.430048 0.4161867 0.5491377  
0.479409776 0.804173 0.1001328 0.7922994 0.3887402 19.02236 2.658937  
0.6188834 0.5882339 0.8525239 0.7170645 2.048922862 2.576405  
0.5728401 1.207993 0.4939127 2.257330944 0.189806 3.091323 3.328743  
0.2380536 1.778235 0.1848531 0.2889758 0.704117583 0.2971927  
0.3648862 0.441640606 0.2444745 0.5555941 1.806024 0.6523837  
0.8984629 0.42015089 0.443213612 1.125922 2.169535 1.178931 0.319716714  
1.659128272 0.80609883 0.9977361 0.259001 0.8457776 0.2169369  
1.970864 0.2994901 0.3466871 4.224087197 1.201242523 0.2948042  
1.653383364 9.261685 0.294555906 1.691444 1.679498 0.6660285 3.389218  
1.408097 0.5583409 1.939258 0.1699797 0.2654747 1.874932091 2.833922  
1.058282 0.4955304 0.7958548 2.026909394 0.3739651 0.187443 1.250729  
0.904132176 0.6423732 0.3738155 0.2547793 0.18448 1.529878 0.798067  
0.2195246 1.361344705 1.202206486 2.356099147 0.3679502 0.474362427  
0.297734622 0.9229494 1.212386 2.260448548 0.702818 0.3999796 0.3877399  
3.420264827 0.3762588 0.1191019 0.2526873 0.279171278 0.09487131  
0.77037 0.4665529 0.5581567 0.4027729 0.5981044 1.202346 0.2366493  
1.037627 0.3921976 1.142246 0.53416541 0.3795756 0.243907 0.4012825  
1.195429 0.2488347 0.2856962 0.2665237 0.085680729 0.549371841  
0.329832417 0.3458515 1.582676 0.3463124 0.8846024 1.214029 1.778218759  
0.4993652 2.000808 0.3801527 0.6533352 0.4235396 0.410265243  
0.3962905 1.262633 1.167671 1.232743 0.6475549 6.759276 1.7562 2.123879717  
0.6227628 0.8057463 0.363970806 0.4126081 0.8622591 1.30427  
1.284736 0.6435988 1.543143437 2.349147684 0.437533007 0.08791731  
2.027268 0.5153428 0.7971642 1.592782 0.3755698 0.855275442 0.7601375  
0.091110838 0.2326741 0.6228736 0.4746029 0.5878858 0.1199076  
0.993023673 0.5563989 0.6541289 0.6417269 0.8373575 0.2393613  
0.6193007 0.7908331 0.989993609 0.9857444 0.437556153 0.1402055

0.05427556 1.208171898 2.180158 0.738327 0.3439918 1.275466193 0.4127983  
1.626689 1.975036 0.530076208 0.595903 0.3928741 0.1164056 0.1753093  
1.595997 1.698388 0.3201957  
GSEC 0.2632626 0.916333804 0.2456679 0.252713837 0.350380932 0.427074108  
0.5081779 0.444871055 0.4459362 0.639656 0.481155461 0.8099474  
0.2816682 0.5186241 1.272673 0.4503073 0.5871091 0.208689449  
0.4101909 0.5253447 0.348869577 0.8024786 0.423235681 0.5861788  
0.298386 0.426504425 0.3191771 0.4030197 3.675396 0.2860764 3.977635  
0.286340797 0.4159533 0.477902276 0.2195068 0.434068675 0.966285519  
0.525569109 0.2504083 0.4816472 0.339135259 0.4198395 0.308212512  
4.583483 0.4793729 0.4150532 0.5981723 0.8305916 0.328384399  
0.1874018 0.6757414 0.6880436 0.284313319 0.5910918 0.694361038  
0.454482 0.29677 0.9203187 0.4561746 4.669466 0.1454088 0.580268  
0.23772662 0.485161 0.3687922 0.6560842 0.286497 0.5155207 0.5176541  
0.4730033 0.2049222 0.373874709 0.3769088 0.1850524 0.330617474  
0.4388089 1.65772098 0.2251652 0.292613 1.711165 0.4822351 0.4524807  
0.6061766 0.345396187 0.413790702 0.3186965 0.3827203 0.3641898  
0.248524963 0.3096874 0.2354357 0.1706875 0.460505441 0.2266123  
0.5245748 0.227430634 0.2985811 0.706220606 0.378187926 0.3962126  
0.527891869 0.4119456 1.697571 0.601339822 0.2947549 0.1980466  
0.349933907 0.4558877 0.529868138 0.602673393 0.2221661 0.925175677  
0.3743784 1.029734 0.3771486 0.4094842 0.5693052 0.351658394  
0.9255316 0.6603373 0.3721917 0.2752955 0.3744337 0.22166  
0.3857432 1.464364 0.275776 0.5655108 0.2716172 0.329256354 0.384053627  
0.2859569 0.526104975 0.768612941 0.2094359 0.655084233 0.4511223  
0.243356 0.887446758 0.305010098 0.51452822 0.399542123 2.534078 0.475832  
0.2232625 0.3249574 0.5567744 0.2099085 0.605500402 0.238138  
0.4180158 1.038222873 0.4128651 0.4766506 0.215445399 0.5961766  
0.3646872 0.634275665 0.3864202 0.7028895 0.197777726 0.3144176  
0.5435139 0.2310249 0.422430401 0.4477431 0.4455195 0.532553648  
0.4505304 0.391433951 0.4757759 0.486328 0.539345582 0.4206553  
0.589744959 0.3546423 0.899063 0.6298237 0.5020052 0.8512275  
0.338602222 0.202888 0.2638562 0.7988611 0.5762597 1.422183 0.2804185  
0.4772921 0.4502754 0.363003765 0.494224552 1.09971 0.267243 0.2283212  
0.3101245 0.415711468 0.2943069 0.857714155 0.5877911 0.3133358  
0.326925637 0.31734417 0.2283391 0.3438791 0.249346257 0.2871592  
0.4849608 1.186696 0.2764345 0.09638029 0.2332833 0.624307 0.5135662  
0.1688343 0.6111777 1.064384 0.3716556 0.284567 0.229229538 0.2722421  
0.2689888 0.321545575 0.2238124 1.652571 0.5643586 0.4068518  
0.2663583 0.388069966 0.5845955 0.3340698 0.3249138 0.9035125  
0.5546975 0.26972541 0.4223079 0.3267042 0.5176785 0.434624433  
0.348050613 0.4116373 0.290935 0.6844652 0.295014788 0.2475787  
0.5377433 0.487926718 0.4889031 0.5669959 0.3536589 1.497515  
0.3086669 0.6806094 0.30760431 0.3533446 0.196271272 0.3207583

0.9386112 0.4524947 0.2804655 0.5142779 0.158987 0.3409686  
0.785105427 0.3343546 0.1865725 0.25158993 0.2861228 0.19404  
0.2700813 0.4009154 0.5311263 0.4764507 0.3416982 0.3297193  
0.567846793 0.3265729 0.437717543 0.2433126 0.3499261 0.4098378  
0.618144122 0.704916799 8.646188 0.5336146 0.4141804 1.312204 0.4379906  
0.563211362 0.3269216 1.266248 0.1741104 0.533939204 0.5265284  
0.2982591 0.358235595 0.6179252 0.44378878 0.6988596 0.6271887  
0.565640702 0.2486947 0.272356 0.31072409 0.366746016 0.1881941  
0.3913167 0.5856185 0.3467815 0.3020192 0.6798744 0.4990616  
0.6937645 0.4368326 0.406001344 0.4225424 0.402314463 1.341122  
0.284912122 0.2733376 0.379366 0.513342114 0.7619937 0.4222543  
0.3731518 0.502471254 0.4184344 0.4067223 0.549800022 0.322527376  
1.051754 0.3707061 0.132878 0.565039284 0.27909739 0.634227396 0.3320964  
0.327853 0.1040081 0.3581791 0.3336231 0.5880518 0.357789 0.4877331  
0.3563284 0.2838193 0.2980089 0.424622914 0.2177527 0.750227  
0.433815 0.2942671 1.63388 0.3656383 0.3438689 0.4520964 0.2097855  
0.3592064 0.221422949 0.4521896 0.2902569 0.4098048 0.2445437  
0.54902382 0.2819656 0.4983897 0.2767491 0.6225284 0.4920551  
0.28662 0.2428225 0.705441468 0.1421087 0.4968943 0.192221 0.3340011  
0.524525 0.8576155 0.4317056 0.3319953 0.596052257 0.720529004  
0.7462409 0.3594166 0.6698641 0.397431403 0.507909041 0.357569761  
0.3142885 0.4151808 0.4372058 0.7051631 0.3716185 0.55919  
0.3010271 0.482129925 0.921668567 0.6143456 0.601858783 1.708093  
0.240747412 0.3264431 0.3635006 0.2859775 0.4370562 0.4665885  
1.227051 0.7907168 0.1581351 0.7639674 0.400737567 0.5064608  
0.198801 0.3912795 0.5993881 0.623412645 0.3383198 0.9331088  
0.3237624 0.367638981 0.4569806 0.4787657 0.1743228 0.3453344  
0.3445728 0.308197 0.5559527 0.509473984 0.436025645 0.284998263  
0.3093203 0.5712653 0.215689814 0.2397331 0.194096 0.482992604 0.24188  
0.259934 0.6603972 0.658176293 0.3851612 0.9665396 0.5196491  
0.34682326 0.106232 0.1359453 0.3869708 0.6862985 0.5521992  
0.2765672 0.237947 0.2335555 0.4092455 4.8969 0.4470809 0.276655549  
2.214208 2.718567 0.2480654 0.3670301 0.494992 0.2304737 0.3644528  
0.260827089 0.28947214 0.28796581 0.2598764 0.564588 0.5468448  
0.6088259 0.471762 0.715759583 0.2477234 0.5506529 0.26415 0.3805602  
0.8445918 0.334564695 2.604086 0.2493079 0.2664695 0.3032713  
0.2792185 0.5969794 0.3967504 0.121592745 0.2709186 0.4901229  
0.966336137 0.1840614 0.2691801 0.5179496 0.4903434 0.2537635  
0.226250468 0.71213005 0.346758953 2.211337 0.4976146 0.1663286  
0.1933982 0.3674817 0.1490202 0.474432691 0.6854101 0.645060493  
0.5270348 0.223616 1.929951 0.2961978 0.8580934 0.721569122 0.541518  
0.5809918 0.7446927 0.228422 0.2167526 0.8066046 0.447994 0.361344944  
0.3094191 0.256283019 0.6943187 0.5316921 0.19923449 0.9512089  
0.8588639 0.4914291 0.228190059 0.2363283 0.5415622 0.3465092

0.387914089 0.1265215 0.7367624 0.940285 0.2870197 0.3197995  
0.2471345 0.1586363  
AC104964.3 0.04974702 0.576085533 0.3826152 0.372832434 1.187452977  
0.64622431 0.3608289 0.31226526 0.1786143 0.013217 0.105314357  
0.2610765 0.2031501 1.344314 0.6054383 0.7984268 0.1910671  
0.90368905 0.1871631 0.2033117 0.430851112 2.58378 5.383204551  
1.596396 1.226199 0.324579274 0.3399449 0.4179257 0.1484008 1.008047  
0.1011769 0.87704384 1.004925 1.401531687 0.8460224 1.155780283  
0.59667741 2.654728354 1.767092 2.594216 0.954804464 0.8484156 0.406946743  
0.270782 0.460989842 0.2770742 0.7532784 0.2703053 0.164809183  
0.09610148 1.100758 0.1748921 0.62785562 0.5242425 0.445391755  
2.144627 0.655064 0.9719811 0.1376984 0.541976 0.2839284 1.287309  
4.44738534 0.5741432 0.09036697 0.4791048 0.3504803 0.6988469  
0.5357702 0.1231462 0.3467842 1.736512592 0.3345275 0.1472115  
1.091322538 0.6035518 0.126937376 0.2713967 0.1595698 0.1310297  
0.4413858 0.06153898 1.107968 0.424982232 2.502656917 0.3719458  
0.2805429 0.1667107 1.33869077 0.5887893 0.1676052 0.586209  
3.513679156 1.204551 0.6463754 0.469223097 0.2807115 1.231234071  
0.194632396 0.3179398 0.139868967 0.02116774 0.2607851 0.863374701  
1.74555 0.3395504 0.224147641 0.7565368 0.804714076 0.344793016  
0.2261052 0.444594952 0.5922185 1.120897 1.172831 0.1613163 0.2654658  
0.248282413 0.5090743 1.198587 0.1792649 0.03635591 0.3606896  
0.7911734 1.155969 0.2530399 0.2881374 0.9360353 1.470881 4.043831636  
2.853830663 0.4963251 1.33822482 0.209415464 0.5755582 0.601496658  
0.3355701 0.07453841 0.101003914 5.78893595 0.082102826 0.509153718  
0.1680486 0.1647981 1.573419 0.5427333 2.283057 1.949169 0.517699461  
0.6777874 1.127171 0.618761238 0.7903625 0.5318392 0.545330473  
0.8057307 0.3437707 0.21931786 0.8871475 0.8837036 0.346576474  
2.068005 1.312921 0.07760937 0.688761176 1.708151 1.628808 0.155847075  
0.07738241 0.318467788 0.7646959 0.1942394 1.434977853 0.4339371  
1.200402807 1.527658 1.608047 0.1348474 0.1970826 0.1074163 0.618309165  
0.2009525 0.1526553 2.885921 1.77307 0.07471714 0.03842466 0.5816558  
1.290704 1.321985552 0.034589029 0.4706449 0.4224294 0.2689103  
0.713691 2.09533929 1.271611 0.982208755 1.547316 0.3986143 0.207236462  
1.483412511 0.2403217 0.05674361 0.921824395 0.5709083 1.15375  
0.1409684 0.4327287 0.692209 0.9616409 0.3320138 0.04231227  
0.08030414 1.992342 0.8917702 0.2089145 0.1025819 0.72468365 3.92257  
0.8928972 0.013502303 0.4311941 0.1955665 1.115584 2.85994 0.7464359  
2.721971591 0.5364399 0.7296233 0.3440997 0 0.4896841 0.339212392  
0.4251312 1.692641 0.2469205 2.154284153 0.087129669 2.048589 0.2924325  
0.5099811 1.504661662 0.6252331 2.022241 0.491556869 0.2800287  
1.043959 0.1079892 0.8411063 0.5715839 0.2469131 1.156778631  
0.8594096 0.09581092 0.4138515 3.003679 1.49222 0.2267435 1.97969  
0.4958442 2.735895 0.05430969 1.349892 2.279245 0.12149444 1.179456

0.209041 0.50312 0.4654703 0.3358193 0.5034718 0.5036762 3.548847  
1.980751701 0.1674698 0.34705881 0.7782553 0.6427833 0.3075503  
1.979830692 0.808383234 0.8182265 0.3217242 2.198569 0.04880457  
0.5592935 0.259660623 0.2949493 3.461506 0.1160879 0.38990858  
0.1074146 0.04930264 0.43806998 0.1312114 0.292701976 0.1636568  
1.188064 1.071013519 0.4699422 0.8796157 0.08089691 1.682305377  
0.3834491 0.3495854 0.9400133 1.139656 0.8669528 1.010677 1.964612  
0.5900982 0.4374201 1.524786165 0.1854799 0.343686097 0.2522454  
0.440424579 0.2894781 0.1606464 1.907805974 0.2726341 0.1182084  
0.2392498 0.391032708 0.162112 0.1978165 0.109706026 0.858358871  
0.07176834 0.2529957 0.2788759 0.887719362 0.866365441 1.435833745  
0.036792 0.6470567 0.1624708 0.03951348 0.1620497 0.3440429  
0.5433765 0.1503724 0.8310643 0.1505213 0.3381976 0.462137031  
1.370053 0.6075402 1.413797 0.7942896 5.042093 0.6969546 0.2467256  
0.4098591 2.521187 0.3917699 2.618152174 2.15016 0.197508 1.341135  
0.1835104 0.557327687 1.186505 7.129936 1.2267 0.1631275 3.059092  
0.1722033 0.4295633 0.198869075 0.1849897 0.07392358 0.590149412  
0.3115961 0.3762365 1.103493 0.1995788 0.9668229 0.2367183  
0.932494189 0.2202633 1.247653 0.1138931 0.177599695 1.582800207  
0.698198717 0.6193691 0.4391245 0.398979 0.3835249 1.588445 0.07101703  
0.4642051 1.141112341 0.763496648 0.5767236 0.761905261 2.76436  
0.505471811 0.2437195 0.7403075 0.4765065 1.645541 3.04405 0.2309837  
0.4705437 0.3246129 0.3756974 1.121567769 2.996748 0.9687993  
0.4271945 0.1216907 0.249082336 0.4549662 0.3284964 0.7882809  
1.60346758 0.8030795 0.1909906 0.3728043 0.1013044 1.448755  
0.7001985 0.3976431 3.792714274 4.478947619 4.226128247 0.2261499  
0.456184733 0.131426052 0.7653197 0.8313464 0.610105599 0.9201108  
0.1879826 0.1466498 0.48278864 0.1973528 0.1087326 0.04047151  
0.123791963 0.08006108 2.129307 0.1596003 0.1522068 0.5598536  
0.4200243 0.8760034 0.09213046 12.81625 0.3135015 0.9598439  
0.330616543 0.1017841 0.0397628 0.2505403 0.6035126 0.1646162  
0.3726038 0.4368475 0.159020945 0.435200392 0.344132843 0.1578703  
1.985933 0.1472802 1.063406 0.848064 0.374055717 0.1517522 1.018627  
0.3118701 0.3665913 0.06904732 0.124434002 0.3952309 4.447346  
1.002557 1.144298 0.2726042 1.384239 1.22755 1.09359263 0.2351119  
0.675547 0.13053953 0.5263381 0.5052347 1.106106 0.4033725 0.357413  
1.79780619 1.439830329 1.643751363 0.04827848 0.5508239 0.3292878  
0.2004722 0.8649953 0.2521828 0.983105515 0.4151354 0.30894857  
0.1187423 0.846197 0.1602053 0.1639802 0.03574469 0.747171523  
1.544604 0.3811778 0.2890144 0.6757909 0.1620904 1.025765 1.976049  
1.439939232 2.504996 0.632114472 0.00522444 0.04719063 2.69140061  
3.072656 1.085712 0.2409324 1.489799989 0.2397782 1.640555 1.857687  
0.60115058 0.1801397 0.2561924 0.07590787 0.08922446 1.156385  
0.5906749 0.2478054



AL049840.2 1.004652 2.173859867 1.312708 2.383886623 0.588545116 2.082909913  
0.9644586 2.185273147 0.4177406 0.4239322 0.711143872 2.28137  
1.562778 3.450751 1.883083 1.512789 1.317942 0.414927006 1.471376 2.404271  
1.182745614 3.386256 0.552233566 2.415284 1.058573 2.100425446 2.751153  
0.427815 0.8250528 0.9610618 2.068037 1.08421471 1.520875 1.490814842  
2.336209 2.929096891 0.977029744 1.442343719 1.192278 1.875736 1.756279863  
3.116386 0.980486137 1.297799 0.811434593 1.110886 1.131144 0.2627266  
1.101295005 1.422661 2.49253 1.78488 1.589867552 1.039634 0.945386237  
2.846417 0.2095117 1.238584 0.7591108 0.490311 1.28785 2.758362 0.898054363  
1.918282 1.237901 1.410514 0.4563886 1.509201 3.454657 1.024045 1.426029  
6.410708739 1.222016 1.287757 1.040804997 1.97813 0.280792184 0.7834486  
1.513435 0.350229 1.101127 0.9869243 1.9358 1.119471007 1.151807689  
0.458849 0.3102879 1.197551 1.490909502 2.920696 0.6399878 0.7834382  
1.74507998 1.927404 1.33757 0.32847705 2.577998 1.14086686 1.958521919  
1.170864 0.877747392 0.8298282 1.284043 0.553850836 2.628956 0.5378271  
1.23690034 1.864733 2.381373497 2.083608991 1.180603 1.53433384 0.956359  
0.8648372 0.8748439 0.8248699 2.690426 1.742037585 0.8617787  
1.790621 0.7511106 0.9717562 1.068312 1.393231 0.9786657 2.795578  
0.9090433 2.580111 1.512121 1.344867044 2.806211659 1.297786 0.841632322  
2.363372031 1.268512 3.907415646 1.034936 1.12899 0.371212983 0.849011285  
2.032822353 2.048690067 1.330894 1.184762 1.366146 0.5546681 2.324715  
2.142401 1.595684253 1.404384 2.552727 1.392745414 0.9295253 3.565161  
0.916213441 3.250272 2.742006 1.034495459 2.297916 0.4598679 0.952830808  
2.331941 1.442713 0.9334884 1.900374519 1.850964 1.385248 0.746940926  
0.5225311 3.669754263 0.3716279 0.999906 0.526770579 0.6627824  
2.798156946 0.5384537 3.331697 0.6631969 0.8594857 0.5742254  
0.556346657 1.197022 0.6375497 4.440763 2.673414 1.508929 0.5135258  
2.296725 2.373797 2.315590838 0.665661022 1.677314 1.89292 2.648099 0.6166053  
2.96231485 0.2614526 2.535587711 1.605848 0.8424527 1.048494754  
3.814439174 1.656601 0.741497 1.908687342 0.1816642 0.5236733 2.668958  
2.215878 1.040739 2.825901 1.536461 1.402395 1.355651 1.894243 2.363911 0.5584071  
1.980267 2.763080514 2.41354 1.871861 0.830076154 0.3114966 1.742431  
2.181835 0.8682444 1.029753 0.349480579 1.200432 0.8007477 1.034711 0  
0.3993179 0.699893218 0.5093901 0.3182893 0.5774939 1.308677289  
0.931554588 2.644185 2.25523 1.190778 4.812705015 1.58504 1.149531 1.919151991  
1.530998 0.9953005 1.002658 1.401813 0.6353166 1.708166 3.941387271  
1.617686 1.237781568 1.086429 2.954808 2.267176 0.8423235 1.278142 0.9911243  
0.7390561 2.876890856 1.75348 2.047375 0.762438088 3.152565 1.396863  
1.814654 2.921877 0.4928058 1.443245 1.014077 2.15457 1.419498476 0.757527  
2.326054079 1.064287 2.272754 2.248056 2.135321576 0.934367688 5.346087 1.17264  
3.01033 0 2.55445 1.224787325 1.756937 8.664806 1.004752 1.087497966  
2.597646 1.021302 0.83097266 2.256772 1.564724582 0.3087796 2.197315  
0.966164298 1.311934 3.262782 0 2.228059576 0.68328 0.8810112 2.23679  
2.848379 1.562814 2.04433 1.903824 0.740632 0.5456168 1.363944701 0.2051456

1.04987155 1.419423 0.402729608 2.031081 0.826976 0.790811272 0.5271612  
0.8530887 0.5813547 0.722131432 0.4853057 2.08387 0.754027533  
1.895295452 1.416586 0.6762316 1.377587 1.016906826 2.490006191 0.997837358  
1.081753 1.214341 0.09650393 1.098401 0.9355872 1.517326 0.345807 0.7145422  
2.841261 1.341093 1.807935 1.114142346 2.07093 0.4856501 3.511305 0.6625135  
12.16508 2.45356 1.82768 1.292142 1.381665 1.114719 1.829765787 2.8408  
0.5508717 2.798478 0.9609882 1.296897544 0.1368952 1.875677 1.511437  
0.9283071 3.069929 0.5830234 1.061524 1.500865672 0.8005519 1.259637  
1.590027978 0.8522334 1.340855 3.139259 0.8984483 2.000685 1.124842098  
0.874547756 0.9963313 2.818741 2.302211 0.619181383 1.785089551 0.214507287  
0.4556449 1.474692 2.603344 0.7058221 2.856232 0.9174693 1.482482  
2.778958111 1.431173956 0.7810382 2.343889824 9.155748 0.594472642  
1.770573 1.101581 1.910479 3.368959 1.909961 1.485935 1.886572 1.142768 1.260173  
1.185190718 2.8302 0.3901988 0.673397 0.8801338 3.178521893 1.926267  
0.4492283 4.172265 1.002242166 1.033524 0.6179715 0.4765715 1.963128  
2.370279 1.294916 0.3826293 1.034065537 0.901262223 1.595237537 0.914085  
1.770541077 1.46902391 2.343527 0.2178533 1.941961289 1.02863 1.632989  
0.5406617 2.39913607 1.140549 1.162524 1.174484 0.428201778 0.4279901  
0.4577549 1.279786 1.202811 0.7020294 1.237241 1.422991 1.64991 1.505781  
1.881729 3.320142 1.136190896 1.014036 2.083125 1.458389 0.8065635 0.7542896  
0.9312609 0.5524358 0.620338336 0.907899245 0.985533977 1.989293  
2.215231 1.285972 0.4290375 4.198582 2.617690849 3.278746 1.613443 1.709942  
0.953378 0.5962591 0.975624598 1.218936 1.445753 1.311598 1.254022 1.571583  
3.011873 1.480503 2.384602129 1.228295 3.009446 1.300515314 1.427845 1.263315  
3.321654 1.848297 0.4921387 3.280103156 3.901237879 0.22764655 0.225826  
3.133045 1.929101 1.271066 1.4713 0.9073866 1.58338178 0.8280704  
0.296436634 0.634772 1.049474 1.167852 1.847977 0.4777094 3.42362172  
0.6095874 0.8732991 1.545012 2.485496 0.2888339 1.640742 3.143301  
2.027039688 2.359682 2.041572209 0.3630742 0 1.804999138 2.45161  
1.381903 0.9770845 1.41693723 0.9432149 1.972386 3.0776 1.092633315  
0.5502799 1.650485 0.2536174 0.3577317 1.16571 1.381462 0.8831443  
HOXB-AS3 2.148567 0.749809306 0.2305166 0.295092613 0.42324617 0.724595476  
0.1977989 0.322548957 0.08344829 0.09879933 0.256889726 0.5629591  
3.148278 1.027032 0.9462941 0.3173061 0.2764372 0.240370118 0.1316777  
0.1473735 0.156681986 0.4984309 1.321325535 0.7129978 0.2618871  
0.676805877 0.5646991 0.05317558 2.325137 0.7967282 9.431691 0.278632198  
0.5007991 0.267262435 0.3350549 0.883164628 0.554519433 0.352951988  
0.5728312 0.5933756 0.491170793 0.2879213 0.171380059 18.25915  
0.832077466 7.766913 0.3289955 0.6612801 0.184796496 0.03315577  
0.6180249 1.766901 0.58296067 0.5435758 0.509199146 0.5970333  
0.06696362 0.9039912 0.1415314 0.3615062 0.02572622 0.310158  
0.079312034 0.1394841 0.3968612 0.7578013 0.06045922 0.7265165  
0.5284913 0.3068464 0.1994055 0.488960107 0.366762 0.02000784  
0.237457711 0.4404232 1.099390203 0.5680461 3.147482 14.72003 0.1319774

0.3154384 0.5171355 0.414367094 1.003530223 0.4812158 0.072314  
1.861497 0.200138819 0.1506751 0.06443369 0.1554907 0.913963145  
0.2878902 0.8806283 0.292293531 0.05380425 0.024543157 0.222515681  
0.1690065 0.19092548 0.2426231 0.451443 0.533520132 0.3797332  
0.1504117 0.086479572 0.846593 1.063432265 0.343651516 0.3144512  
0.437513888 0.07378223 0.449178 0.9922468 0.1258296 0.2315136  
0.463988304 0.3805417 0.5369753 0.1521122 5.582863 0.2769087  
0.3826806 0.3675386 15.24562 0.3248469 0.6632594 0.4863211  
0.250741895 0.629086065 0.3306841 0.258913027 0.887069165 0.2566341  
1.661919738 0.2894358 2.386619 0.12269098 1.947000788 0.549129143  
0.401063476 9.109716 0.3823118 0.9064655 0.4295672 0.4695473  
0.2541871 0.815814949 0.5812815 0.8301273 0.608598076 0.05908094  
0.2271765 0.062117149 1.248936 0.2528955 0.202518844 0.4102007  
0.6079706 0.518143604 0.6038549 0.4470961 0.08702149 0.249126136  
0.3623555 0.6364526 0.393684032 0.1461339 0.39147658 0.4535192  
0.2043517 0.506410883 0.3012057 0.845151638 1.02901 1.337183 0.4515871  
0.1628302 0.2535648 0.366096321 0.1373398 0.09271633 0.671561  
0.8043026 6.602987 0.02154231 0.7608958 0.4691341 0.44574428  
7.518891969 0.9381735 0.1207368 4.591607 0.0215554 0.627815151  
0.1706116 0.671464079 0.8897267 0.3326187 0.182575771 0.552098626  
0.2363745 0.1036855 0.465856493 0.1625766 0.3498607 1.580645  
0.6197044 0.258719 0.227003 0.2148476 0.2783364 0.07582574 1.169458  
0.8814722 0.3616503 2.862783 0.350520396 0.1524157 0.05234948  
0.222050418 0.8885713 1.163782 0.4881471 0.802355 0.2447884 0.186590044  
0.7553682 0.3178524 1.650498 16.36993 0.3350262 0.142353418 0.1424588  
0.6866834 0.3614638 0.675051577 0.494994898 0.4745043 0.8098887  
0.5871657 0.621206446 0.3469155 0.2667634 1.180785098 0.5423451  
0.9245235 0.1274585 3.654096 0.0761469 0.2497147 0.209051175  
0.2171572 0.155177295 0.3922255 1.380887 0.9158512 0.327498 0.6291158  
0.07735346 1.153104 0.398592809 0.5469709 0.7401644 0.236919543  
0.8043245 0.05208724 0.2446855 0.1159823 0.2461085 0.1199968  
0.3911756 0.4538754 1.42699897 0.1540757 0.379468223 0.09470497  
0.295105 7.000192 0.225022714 0.28308622 6.361038 0.2514259 1.02101  
9.120561 0.3896681 0.251189176 0.226779 1.416983 0.09090997 0.64628816  
2.202356 0.128991 0.126760549 0.3411574 0.310925889 0.0719625 0.6650211  
0.37027787 1.108514 0.1945745 0.24188725 0.940331564 0.207014 0.1941242  
0.6341221 0.2987225 0.2336037 0.4655503 0.2983969 1.00496  
0.2833818 0.617582807 0.1243063 0.057091377 15.63044 0.242586735  
9.268695 0.4180769 0.23641518 0.5203369 0.3976324 0.1083899  
0.223213653 0.30053 0.03479322 0.218685649 1.213532435 4.935621 0.2031274  
0.3799858 0.976418377 0.174092174 0.643986071 0.7013174 0.6277626  
0.04048322 0.3071847 0.1259803 0.4050552 0.2030916 0.4079919  
0.361183 0.1091076 0.1338398 1.327632064 0.05650415 0.3225715  
0.4011791 0.193704 1.423122 0.330381 0.08958105 0.2828092 0.08748766

|             |             |             |             |             |             |             |
|-------------|-------------|-------------|-------------|-------------|-------------|-------------|
| 0.2928546   | 0.305237843 | 0.2933441   | 0.2824429   | 1.788886    | 0.2687552   |             |
| 0.695986963 | 0.01276162  | 0.6037412   | 0.5317797   | 0.1101399   | 1.056681    |             |
| 0.1973781   | 0.2665784   | 1.163030329 | 0.1251132   | 0.1519626   | 0.239983811 |             |
| 0.2058393   | 0.7916474   | 0.5981585   | 0.2826731   | 0.3929979   | 0.235934601 |             |
| 0.179359245 | 0.5910534   | 0.8993332   | 4.448411    | 0.150075153 | 0.33947495  |             |
| 0.683889148 | 0.1189329   | 0.3198363   | 0.4912248   | 5.423637    | 0.4749559   |             |
| 0.2919754   | 0.2343385   | 0.265378046 | 1.363814488 | 0.5518217   | 1.225042122 |             |
| 2.65039     | 0.438304569 | 0.4110828   | 0.7530701   | 0.4749289   | 1.23007     | 0.512784    |
| 0.9598961   | 0.4660547   | 0.3314294   | 0.418507    | 0.50693407  | 0.5376288   |             |
| 0.05952279  | 0.1637616   | 0.5029879   | 0.948985094 | 0.09794734  | 0.4111646   |             |
| 0.5075747   | 0.752364088 | 0.4817347   | 0.2404526   | 0.2544447   | 2.527381    |             |
| 0.2929027   | 0.08487735  | 0.1545674   | 0.2891924   | 0.890583389 | 0.349671669 |             |
| 0.1649277   | 0.532529664 | 1.134262479 | 0.2443877   | 0.06092603  | 0.605764796 |             |
| 0.2249075   | 0.2599623   | 0.3024088   | 0.72178542  | 0.07974302  | 0.2902838   |             |
| 0.2766001   | 0.2612798   | 1.142534    | 0.2133637   | 0.2013255   | 1.385113    | 0.1756667   |
| 0.640766    | 0.2460125   | 0.2961371   | 0.6499816   | 0.8880546   | 0.4999771   |             |
| 0.097091297 | 4.12936     | 0.5231313   | 3.321155    | 0.3007573   | 0.2601701   | 0.2170346   |
| 0.5196724   | 0.173487198 | 0.404665952 | 0.16537188  | 0.1432988   | 0.292228    |             |
| 0.2715663   | 0.4649495   | 0.4809217   | 1.270968197 | 5.199213    | 0.3666196   |             |
| 0.0896647   | 0.02962521  | 0.1905749   | 0.328658408 | 0.1136315   | 0.1437607   |             |
| 0.6640503   | 0.5559985   | 24.00564    | 0.5155559   | 0.9288047   | 0.032268911 |             |
| 0.1437955   | 0.1234403   | 0.363709197 | 0.2642552   | 0.4873181   | 0.3952987   |             |
| 1.166349    | 0.688171    | 0.357759291 | 0.452143297 | 1.095035834 | 26.35398    | 1.034317    |
| 0.03371893  | 0.1254612   | 0.8327408   | 0.5872839   | 0.697201507 | 0.3427423   | 0           |
| 0.08876189  | 0.4149506   | 11.072      | 0.6294544   | 0.1335988   | 0.712782253 |             |
| 0.8214061   | 0.6512843   | 0.360072    | 0.2020661   | 0.1436033   | 0.6158367   |             |
| 0.1224937   | 0.83957565  | 0.2557196   | 0.367512683 | 0.05467501  | 0.2234134   |             |
| 1.112014136 | 1.24393     | 0.3091764   | 0.4223059   | 0.539744867 | 0.0811645   |             |
| 1.576023    | 0.4702785   | 0.206710325 | 0.215452    | 0.4124791   | 2.056913    | 0.1333936   |
| 0.2370973   | 1.166926    | 0.5900196   |             |             |             |             |
| AP002807.1  | 0.05230272  | 0.513047711 | 0.2026368   | 1.054904337 | 0.688305008 |             |
| 0.472099354 | 0.3841082   | 0.510369027 | 0.1848562   | 0.1875961   | 0.170457873 |             |
| 2.886094    | 0.8087642   | 1.120739    | 1.041614    | 2.749449    | 0.7435909   | 0.262301723 |
| 0.130221    | 0.4518037   | 0.316783875 | 0.9332558   | 2.55232295  | 1.828833    | 0.6305841   |
| 1.151732909 | 0.301564    | 0.2313842   | 0.1685067   | 0.9113223   | 0.3097384   |             |
| 0.207472736 | 1.052934    | 3.01097108  | 0.3313482   | 1.235409908 | 1.462359631 |             |
| 1.641234788 | 0.5817133   | 1.07497     | 1.299346577 | 2.339453    | 0.203380926 | 2.484929    |
| 0.465463124 | 1.130642    | 1.821993    | 0.9300828   | 0.121834745 | 0.08743725  | 1.523705    |
| 1.053114    | 1.172565675 | 0.8000927   | 0.2943924   | 2.344219    | 0.3178695   | 1.737851    |
| 0.1221518   | 0.3747658   | 0.1221198   | 1.082195    | 1.485028731 | 0.2037282   |             |
| 0.04008213  | 0.8377055   | 0.159441    | 0.645947    | 1.084488    | 0.4046023   | 0.2524153   |
| 3.103935667 | 0.1714604   | 0.07914599  | 0.496932167 | 0.3654378   | 0.062127303 |             |
| 1.078583    | 0.2800635   | 1.06273     | 0.1624216   | 0.2703556   | 1.227395    | 0.218550937 |
| 1.685902901 | 0.2199679   | 0.4004784   | 0.5669059   | 0.620164093 | 0.3889899   |             |

0.3625009 0.2348496 1.684850511 0.4846047 0.8631791 0.237855026  
0.5789142 2.368912005 0.189585003 0.08356841 0.302101276 0.2169883  
1.233822 0.299550792 1.904828 0.1784972 0.273673152 0.7608721 1.818641451  
0.461013569 0.124389 3.621146312 0.3356435 3.75869 1.225915 0.2322835  
0.7326476 1.046190006 1.344759 1.06923 0.1146129 0.5160194 0.3113188  
0.8257027 2.474707 0.6384949 0.6033972 1.406988 2.509258 2.182118156  
0.955980635 0.1786678 3.780210022 1.12839157 0.1552628 1.296815987  
0.3358477 0.293879 0.164267118 3.324943078 0.28622151 1.696590374  
0.7950686 0.4570596 0.3911727 1.057317 2.357483 0.4022002 1.092269133  
0.3231594 1.852049 7.087565063 2.019249 0.7089373 0.270291806 0.8302338  
0.2968902 1.174966651 0.7788724 0.5919948 0.245957498 0.9554793  
1.121551 0.1032705 1.997240177 0.6552627 1.29896 0.216117189 0.2215931  
0.719881787 1.853808 0.272291 0.451638237 0.5132589 1.634456936 0.8935258  
4.546771 0.2169157 0.4416792 0.2674769 0.868910996 0.285223 0.417545  
2.16889 1.111326 0.8444733 0.6703657 1.501047 0.8403516 1.037990028  
0.180011723 4.870922 0.6612984 1.171822 0.2728568 1.07532075 1.407642  
2.283786555 0.5497178 0.6798073 0.21885571 1.125296365 0.2094485  
0.05965875 0.767837979 0.5305677 0.2574811 3.584842 1.271493 0.8596789  
0.9844378 1.008137 0.140131 0.1299773 1.708091 2.562859 0.1040435  
0.1348149 0.819337144 0.7924068 0.7662011 0.542995837 0.468662  
0.244922 0.9815851 0.718307 0.1822722 2.755585646 2.006787 0.1028736  
0.6104995 0 0.4908443 0.126700724 0.08669712 0.7243591 0.2677184  
1.441337068 0.123667917 1.316352 0.2835147 1.691743 1.26590062 0.8386343  
0.8658453 0.849252535 0.6323228 0.8965995 0.05378068 0.7841813  
0.2945243 0.2576891 2.42071955 0.4867775 0.056662372 0.1573398  
3.59575 1.653518 0.1818246 1.131193 0.2039939 0.6885116 3.410414927  
1.447427 0.9943826 0.124959219 0.6975278 0.0927198 0.8747079  
0.3920628 3.021878 0.01726099 0.5415873 1.708742 1.273274235 0.07618561  
0.404372807 0.6850359 0.9458618 0.5790611 1.958293201 0.964766196 0  
0.8994441 1.388801 0.8851294 0.3339763 0.27099306 0.1395459  
2.502045 0.1830777 1.263238177 0.2419991 0.1457874 0.601719431  
0.121458 0.255099628 0.1594127 0.839146 0.775908988 0.4446765 0.6582158  
0.38273806 0.555716491 0.1511807 0.2835347 1.16608 0.8578056  
1.001581 3.644429 1.129465 1.141022 0.3276731 1.149648139 0.1512999  
0.103240746 0.7851442 0.315301128 1.455172 0.08444973 0.591287114  
0.8233288 0.2237061 0.2915589 0.4541025 0.2147548 0.1651599  
0.358384253 1.03733412 0.6529791 0.5541524 0.1586636 1.079990376  
0.903528301 3.88910237 0.2393458 0.1139862 0.106761 0.3271546  
0.1380036 0.0915598 0.4590738 0.1580976 1.188719 0.1510608  
0.2117746 0.364409129 0.5029115 0.1746121 1.269571 0.4264317  
3.835106 0.5227617 0.2668123 0.2113142 0.5075828 0.4932794  
1.264265058 1.025016 0.2843968 1.049663 0.2480632 3.2107151 0.5250102  
5.653493 0.8953729 0.1991706 2.272855 0.1222088 0.239663 0.442769856  
0.1562893 0.2295208 0.122852609 0.4456939 0.5274203 1.96926

1.068487 0.7377768 0.38368916 0.967500102 1.723483 1.036517 2.155397  
0.200930931 1.34287754 2.183219323 0.4435848 0.5327124 0.4719107  
0.6990388 1.605525 0.2239964 0.2852259 3.404250316 2.462892412  
0.1819056 0.935184993 2.736574 0.31089234 0.473059 0.6318998 0.270063  
1.615047 0.9297037 0.1852248 1.641843 0.07491721 0.1394112 1.974452887  
2.173985 0.09418287 0.3238999 0.7789439 1.349519975 0.2238629  
0.2530055 1.135467 0.630246315 0.4456222 0.1664547 0.191718 0.1497781  
1.170846 0.4476713 0.5455835 2.010122966 1.80799116 1.698013442  
0.104386 0.680010236 0.098922835 0.4042716 0.1542452 2.071244157  
0.9517479 0.266814 0.3708384 3.3297281 0.08832414 0.202099 0.1094161  
0.37897097 0.1377395 0.2700842 0.342154 1.268034 0.1471539 1.013884  
0.4236124 0.5666519 2.158329 0.3512921 1.376743 0.209492049 0.5691155  
1.599063 0.3951174 0.7733181 0.4227932 0.2632838 0.2000134  
0.091502898 0.188324324 0.247130728 0.2134038 0.8323061 0.1974293  
0.9018128 1.946877 2.477616362 0.3739414 1.189953 0.1797101 0.1875038  
0.9674621 0.147180002 0.958928 2.260508 0.4603183 0.3383677 0.8598268  
3.090711 1.133222 1.140319423 0.1516851 0.8345467 0.238620646 0.1486688  
0.6168665 1.230112 1.174418 0.5508515 0.493507663 1.601932305 0.221621165  
0.08565537 1.897203 0.1920724 0.3088044 0.5890649 0.2868083  
0.954102954 0.3371185 0.524710006 0.1716585 0.5444777 0.6718288  
0.4298463 0.539053 0.740667726 0.5395025 0.1860673 0.4415498  
0.6394581 0.5538572 2.006196 0.7866883 1.20356211 1.51408 0.18691557  
0.03707667 0.1302394 0.798738245 2.123251 0.3669072 0.4520274  
0.562151589 0.1605332 1.293628 0.7160413 0.19909073 0.4504876  
0.1087776 0.1683441 0.1451097 0.5158435 0.935689 0.2713918  
ARRDC1-AS1 7.768482 3.678577071 2.121108 3.775151586 3.439109089 1.986933923  
2.788526 3.149601341 1.538182 1.694456 1.912670154 3.874039 1.941308 2.95886  
3.758943 3.935546 2.532981 2.630511564 1.048702 1.742104 2.343950252 2.443331  
5.170940003 2.393923 3.704886 2.558531752 1.827226 2.141465 4.601655 3.569543  
3.765132 2.154213672 1.748358 4.532273775 1.987057 3.226084783 5.004391179  
4.0986464 2.850413 4.507346 3.567328508 2.850039 1.936609022 11.00297  
2.424898797 2.514736 3.833283 5.240775 2.042551592 1.310877 3.870253 8.705773  
3.048670754 3.11023 2.848744498 3.437946 3.233393 4.340113 1.067242 6.563653  
1.834968 3.887861 5.296883163 1.702586 0.7985192 1.630614 1.232872 3.188501  
3.150122 0.9836566 1.619392 4.105247681 1.923919 1.483216 3.198341684  
2.147927 4.64663815 2.224202 1.634362 12.17826 1.175221 1.221867 3.477453  
1.025770244 3.892190207 1.825448 2.086351 7.933642 3.221288926 1.779543  
1.204904 1.852218 2.937000776 3.431379 3.916015 1.572829232 2.544082 4.563320379  
1.687271351 1.862382 1.464546631 1.090578 2.253011 1.710304169 4.836864  
2.531415 1.403463454 2.252554 3.830868112 2.263157522 1.077338 4.605446634  
3.133936 4.873605 6.318113 2.437037 2.491546 4.025292923 5.062591 3.031757  
1.224869 2.520262 1.68777 2.208165 3.67253 6.002992 1.646935 3.370392 7.540808  
6.63137206 3.099865444 1.719387 4.527255557 3.33156092 1.748219 2.654683376  
1.963936 2.299699 0.975711773 5.290048112 2.045103133 3.568440703 4.370009

1.954113 1.867191 4.054684 5.44921 2.655528 3.492596107 1.894889 2.567997  
4.038531391 6.117478 2.326383 2.128188969 3.3996 2.137911 2.944649936  
2.903913 6.109271 1.755926624 3.135958 2.45576 2.690846 2.542283335 2.662005  
3.991841 2.343773581 1.576176 1.856994969 3.725479 1.715301 2.508891086  
2.457263 3.436797878 4.767018 6.49261 1.408875 1.572168 2.08632 3.374082957  
2.221987 2.714995 5.787551 4.176202 4.535824 2.192596 4.419073 2.610547 4.077817968  
3.978535362 7.753712 2.865627 5.553654 3.221792 2.505357696 3.652706 3.525490719  
2.254592 2.743437 1.662734941 2.219825912 2.530868 1.737464 3.453475959  
1.701951 2.093121 5.425986 2.668791 2.182293 4.999589 2.725258 1.55132 2.415552  
4.149454 5.660297 4.624191 1.816324 2.43247365 3.553974 3.723431 2.572282036  
2.792638 2.719942 3.30901 3.858161 1.829084 4.99171455 5.657599 2.356296  
3.710569 6.52781 1.620934 2.524141687 3.126501 5.289233 1.978493 4.35409477  
1.732956912 3.313863 1.390032 2.802343 3.032359041 3.374934 3.963351 3.970531333  
4.476118 2.963743 1.518606 2.501659 1.579895 2.218804 5.384084872 2.378479  
2.544655604 1.425594 5.87323 4.836776 1.828045 4.308522 2.557209 2.571859  
15.132085659 3.922529 5.797552 1.689870575 2.888328 1.674977 2.745357 1.825221  
3.944747 1.110308 2.790129 7.858185 4.10159664 2.569929 1.923993401 3.762415  
2.577291 2.895305 2.607974889 2.539223459 1.938941 2.426747 3.718069 6.880619  
2.166508 1.400013497 1.31766 2.337042 1.371045 4.813898358 2.402391 0.9525407  
2.014848399 1.784013 1.292063052 1.868589 3.663285 1.748417231 5.030042  
2.871387 6.49412043 4.321877227 2.207827 1.681416 2.671489 2.837374 2.941099  
6.231481 2.138216 6.701416 2.166271 5.26971832 2.161034 2.000121858 7.380763  
2.256601803 2.760269 1.867765 2.175836282 3.690544 2.018258 1.103202 2.632221851  
1.771428 1.88915 1.389561514 2.526405894 6.072197 3.530886 2.135939 3.487176718  
3.231322864 7.819008002 1.223292 1.443332 0.1514065 1.377691 2.353231  
1.118139 2.976229 4.037136 1.956755 1.388134 1.436125 1.834851464 2.394381  
2.796061 2.620105 1.984361 3.920554 2.668121 1.152902 1.366197 2.202772 1.983601  
3.446335261 7.278091 3.549684 3.207807 1.911559 5.734930603 5.502379 8.606237  
4.589644 1.122274 4.525353 1.416775 1.811105 1.366584723 1.878719 2.0593  
1.945915701 2.309505 2.50439 3.487094 1.47881 1.617497 1.386614107 2.972863949  
2.672934 3.523655 6.797505 2.386974064 3.992931981 5.173157293 2.539484  
1.969652 1.694228 2.568808 3.78046 1.1558 1.719134 5.119521929 4.847191596  
1.870321 3.255371233 2.880118 1.574649514 2.598177 3.80406 1.867415 5.516331  
2.440061 2.265636 3.96059 2.267219 2.506686 3.812681346 5.529483 0.4611291  
2.014573 1.60385 3.196192545 1.408592 4.192193 2.819425 2.323180679 1.853155  
1.150205 2.767461 1.759989 2.477118 2.181264 4.12596 5.007797632 3.790876804  
5.208513143 1.718302 2.066524614 1.102283018 2.492742 0.468745 3.504345944  
2.971969 1.920108 2.084277 4.399527812 2.741653 2.968493 1.911939 2.390604357  
5.302076 3.221544 2.109464 7.49293 1.507212 5.176337 2.748648 0.8665358  
5.847411 5.047859 3.304423 2.313118702 5.160843 5.88856 1.320821 2.350084  
1.307393 2.319157 2.330026 2.487215127 2.085753032 1.914366376 1.445672  
3.185102 1.905819 3.774299 2.192403 3.129092818 1.545495 5.462 1.710256  
1.614481 4.187386 1.78909717 6.119704 6.279128 2.047649 3.907488 9.2479  
6.232603 7.470572 3.025747738 2.266411 3.651344 2.673134566 1.303627 3.222026

3.426742 3.4681 3.627035 3.2715147 3.662973439 1.765381349 6.594351  
4.060156 2.080785 2.245564 3.917906 3.230728 2.529495757 2.427596 3.094231453  
1.335775 3.84462 7.590793 2.49575 3.05683 3.563862241 3.651674 1.921085  
1.572709 3.562695 6.042078 3.909663 3.418607 4.077394746 3.457534 1.851354215  
1.840351 2.968443 3.066415206 4.788335 3.437968 1.144745 2.617290191 2.672356  
3.576048 4.309376 2.283264091 1.28268 1.975554 3.086599 1.383082 2.050584  
2.925669 3.079063  
AP006621.4 0.05943044 0.18217654 0.2763022 1.179014554 1.479659949  
0.638614526 0.2909692 0.274699514 0.240055 0.0710538 0.566163648  
0.8097299 1.358494 1.528166 0.5621927 3.884798 0.6626872 0.596095457  
0.2663411 0.2318466 0.438205612 0.3285865 2.776738324 0.8366226  
1.678701 0.964297151 1.066055 0.3824244 0.127647 1.96748 0.06399072  
0.44202515 0.8880686 0.461298982 0.4819248 2.25523599 1.416012535  
1.424575857 0.2766927 2.937701 2.014553279 2.630288 0.154064874 0.4266729  
0.362671267 8.751014 5.0961 0.06605205 0.138438164 0.2781885 1.214531  
1.082665 2.842369726 0.5909331 0.457752804 4.134676 0.6621783 1.06329  
0.06939923 0.3137756 0.185016 0.8865095 4.61065801 0.154328 0.3339926  
1.306483 0.2174032 0.9205794 2.434866 0.07355853 0.5258257 0.711666292  
0.17984 0.07194549 0.688601446 0.5407764 0.235312999 2.801303 0.4980991  
0.4528337 0.2109212 0.09452282 2.353492 0 1.113752736 0.2307183  
0.2080251 0.4201062 0.899590132 0.1425809 0.4119019 0.1270736  
1.403936525 2.048402 0.7286029 0.840838382 0.3869456 0.529523225  
0.246195777 0.4178106 0.06538497 0.07586433 0.1106814 0.185658018  
2.382308 0.7098787 0.038871104 1.217694 3.630829286 0.214908581 0.08480429  
2.117824057 0.3979664 1.584122 0.9775302 0.6786993 0.2675865  
2.335814806 0.3649003 1.106465 0.02604642 0.3908944 0.3406431  
4.928825 0.7592281 0.3174097 1.929913 2.4112 3.117328 2.604720215  
1.97094589 0.3190256 0.719421614 0.375268313 0.1628509 3.356405161  
0.6591556 0.1669642 0 2.518706881 0.023230519 0.529776728 0.1338399  
0.4276974 2.343627 1.587573 2.630052 2.774711 2.231511563 0.9603666  
0.9552081 0.393918537 3.824047 0.7034381 0.055841216 2.444807 0.02933477  
0.554842176 1.671696 0.2522515 0.425868406 0.6079866 0.9803031  
0.4432998 1.28401421 2.202659 1.757908 0 0.1313694 0.570687892  
3.159663 0.3480731 0.728393999 0.1388583 1.500765881 1.308601 4.80833  
0.02899725 0.1951718 0.06078564 1.283522004 0.4321235 0.2308122  
1.091641 2.158939 0.8479802 0.05164217 1.883275 3.055594 1.391140771 0  
0.4216931 0.3673604 3.690201 0.6588376 1.30332109 3.943905 2.391928589  
1.432084 0.7475324 0.318311643 0.807568246 0.1699941 0.06778894  
0.977174859 0.4749904 0.4388553 0.06315315 2.179398 2.465344 1.57208  
0.9324033 0 0.113608 0.7547815 1.069759 0.4137781 0.1225498  
0.859379937 6.080926 0.1882416 0.072587568 0.4698797 0.7215174  
1.353052 1.024991 0.8025588 3.99376516 2.313802 0.4156197 2.196708 0  
0.4908074 0.063985453 0 1.005979 0.4977861 2.3981484 0.281042315  
1.684094 0.2834934 0.5042074 1.083042088 1.732585 0.9346491 0.178151472



1.197491 0.7506848 0.2138843 0.5053706 0.2129664 0.7027357  
1.708453939 0.5531147 0.042922812 0.05959394 6.294826 0.506658 0.2892446  
1.850903 0.4404082 0.4302874 0.079626989 2.814606 0.5021756 0.085193061  
0.4727704 0.09364933 1.466427 0.5307995 0.2123935 0 0.5626458  
5.824817 1.697571334 0.2077633 0.278472729 0.7297419 0.7890659  
0.2024537 1.275969237 1.957576414 2.345993 0.7861682 3.735824 0  
0.1459577 0.123169402 0.06795555 5.686037 0.1485909 0.364543491  
0.2749783 0.03313101 0.22790689 0.0306689 0.372682472 0.07763022  
1.785927 0.395842168 1.291261 0.6996636 0 2.566532742 0 0.3490221  
3.636022 1.670924 1.381948 1.850272 0.6732516 0.1379275 0.195962 1.371636118  
0.03438375 0.205292865 0.3211712 0.436154535 4.863177 0.2239029  
0.795270735 0.6548714 0.1270962 0.506682 0.038221242 0.1045805  
0.03127793 0.140422142 1.705353397 0.5342155 0.3526159 0.853986  
3.40880421 2.504047579 3.55071969 0.09889578 0.07401145 0 0.106211  
0.2787742 0.3236719 0.4520842 0.4191668 0.4675554 0.1716471 0  
0.535855484 0.3555673 0.4273402 0.6028717 0.7571016 1.998967 1.09662  
0.1894831 0.1129937 1.310807 1.324824 2.937677989 2.285456 0.6001429  
0.5896542 0.2617353 0.881223565 0.3212233 2.206562 3.824416 0.1414457  
2.731021 0.1851509 0.3921464 0.031444358 0.1183921 0.1987044  
0.380712929 0.3895633 2.547009 1.595827 0.169409 0.5029918 0.212097224  
0.820847455 0.3947075 2.115996 0.7079518 0.207557669 2.979958703  
2.718033118 0.9164287 0.9382296 0.3154246 0.8450028 2.328923  
0.09544583 0.1944576 3.919296667 2.505351513 0.1653563 2.009337326  
3.796024 0.597824932 0.2015725 1.600145 0.6137335 2.211583 0.6338412  
0.5472138 0.6007834 0.1276902 0.3168199 2.699244341 1.825838  
0.03567265 0.2061026 0.4617897 2.591712883 0.2348036 0.2464154  
1.321675 0.397852858 0.5863009 1.405032 0.174276 0.1361516 1.773875  
0.5290263 0.1710164 2.822576847 1.299093825 4.292407851 0.1779173  
0.571111899 0.321153887 2.077129 0 1.001493435 2.238132 0.1515875  
0.05437105 1.38911017 0.7742118 0.08350569 0.09324531 0.1565878  
0.07825519 0.736538 0.1608754 0.5692206 0.5573591 1.2903 0.4943508  
0.6934029 3.16022 1.389687 0.5136714 0.063477666 0.2487206 0.17101  
1.077512 0.202778 0.328702 0.05202846 0.2020186 0 0.171191058 0.231254683  
0.0909323 0.5464225 0.1847462 0.2696606 1.280153 1.718406339  
0.3059291 2.974659 0.107474 0.3195847 0.4568545 0.044596647 0.3268827  
7.043364 0.9551341 2.306879 0.4310305 2.532751 4.70799 1.663163108  
0.2298086 0.1210567 0.191392543 0.1900452 1.664713 0.5448856  
1.262976 1.077166 1.847215988 1.731879547 0.54943265 0 1.492443 0.3879959  
0.551395 1.268226 0.3389298 0.474305292 0.3664056 0.170347582 0.03546397  
1.710463 0.9004021 2.573166 0 0.420802294 0.2229181 0.2927413  
0.2265848 0.3778332 0.5486517 1.128943 1.140042 1.574008762 0.6229094  
0.283184115 0.05617255 0.2114117 0.710286928 4.332121 0.4169087  
0.7146141 0.933573175 0.2675352 2.337706 3.350209 0.161587468 1.383457 0  
0.02550476 0.1199163 1.243331 2.098054 0.3453817

AC012615.6 0.4316093 0.545015193 0.3128072 1.814740739 0.879836918  
0.481787037 0.5186487 0.363927728 0.1040825 0.06931654 0.271315587  
1.533053 0.4561962 1.470097 0.808238 1.819818 0.8763457 0.478139485  
0.3271922 0.5744204 0.325707839 0.6670084 1.859406371 2.112089  
1.180534 1.065154093 0.5172439 0.3108951 0.1176079 1.563935 0.3329395  
0.517461227 1.219315 1.125050697 0.7835697 1.05265352 1.152725538  
1.510470488 0.9664075 1.776507 0.939274699 1.64999 0.106878583 0.576752  
0.570017554 0.9768165 1.765672 0.4152612 0.264104365 0.1464627  
0.9971671 2.211214 1.894797325 0.4631588 0.396942937 1.999554 0.2349048  
1.633325 0.1103299 0.4372911 0.2506839 0.8121384 2.370042238  
0.3763867 0.2567118 1.205755 0.2461265 0.8953744 1.750924 0.2152801  
0.1968973 2.591019379 0.1624472 0.07018643 1.021083142 0.3684507  
0.13263445 1.632096 0.2459598 0.7090007 0.2171956 0.1434405  
1.404655 0.222522972 1.574249099 0.2417496 0.2198505 0.5707327  
0.871094558 0.4327394 0.2120774 0.1818177 2.116670693 1.012291  
0.6500375 0.664036179 0.2348795 1.396669652 0.266862578 0.2140904  
0.155922105 0.180912 0.5358774 0.482983207 1.839094 0.4103836 0.244377913  
1.098167 1.691478257 0.547430131 0.1777181 2.131632201 0.4313735  
1.804639 0.7523079 0.2697466 0.5027516 1.103182299 0.5636327  
2.210561 0.0677589 0.09079454 0.4317248 1.106482 1.383794 0.6487885  
0.7762121 1.335212 1.38457 2.052374523 1.437211932 0.2766448 1.440360776  
0.840658112 0.2471298 1.632733956 0.7972183 0.1085879 0.139785877  
1.767649107 0.166191925 0.88689508 0.3844487 0.4039945 1.442458  
0.7999586 2.132844 1.974423 1.114294713 0.7470593 2.355518 1.280957589  
1.363263 0.5853939 0.32080255 1.382627 0.2035025 0.811914529 0.9379901  
0.4648254 0.265430207 0.8786983 1.827662 0.327879 1.068125769 1.129888  
1.466856 0.062631402 0.08543831 0.965006714 1.841344 0.3437549 0.480900861  
0.3431736 3.066418176 0.8217233 2.772321 0.1320119 0.3626665  
0.1449542 0.76341302 0.2810388 0.2335084 2.180101 2.075245 0.5418227  
0.06157497 1.116974 1.359339 1.13421771 0.056436216 1.851223 0.2968387  
1.583495 0.3780759 0.983864025 1.253993 1.051762975 1.175784 0.7346572  
0.13369997 0.773233981 0.3980107 0.3233096 0.938151577 0.4514955  
0.3551855 0.7050815 1.401482 1.280685 1.166617 0.7161344 0.08876266  
0.2019573 1.379153 2.662691 0.06407322 0.1195534 0.652064157 2.738396  
0.9692066 0.283251244 0.2580573 0.5988536 1.236729 0.6172409  
0.4377709 1.641564422 1.628404 0.2477798 1.144604 0 0.4256064  
0.228877061 0.04271264 0.5452126 0.2817768 1.388492028 0.040617906  
1.388314 0.2234845 0.8881159 0.902479906 1.337155 1.023772 0.431270786  
1.134835 1.170179 0.1391033 0.7726775 0.2506304 0.5585995 2.414837682  
0.48669 0.139577847 0.2842247 2.729297 1.33636 0.1343679 1.203766  
0.6331541 0.5003282 0.788309352 1.683496 1.447919 0.04925043 0.7234685  
0.142115 0.9749089 0.6205638 0.67532 0.2040933 0.4726546 3.702864  
1.380054935 0.1501359 0.289775045 0.7909998 1.185628 0.4023224  
1.302119162 1.383481633 0.9959795 0.8095547 1.752424 0 0.5695561

0.329321721 0.2013375 3.473888 0.2577029 1.047134095 0.1669143  
0.07900678 0.417220473 0.07313545 0.520668766 0.1739035 1.292751  
1.045372914 1.05887 0.7060933 0.28284249 1.148118423 0.2358578  
0.2502737 1.596539 1.33683 1.351096 2.101097 1.017113 0.5501812 0.4248239  
1.437218285 0.01490803 0.139873541 0.7039998 0.202614576 0.9347975  
0.2080271 0.963094919 0.9126569 0.1446535 0.2196861 0.256864192  
0.1964898 0.08136851 0.15220982 1.217840941 0.759212 0.3057729  
0.3291284 1.485371849 1.655691769 2.426406903 0.1822358 0.2085832  
0.07363635 0.1888081 0.1586423 0.2305536 0.4146443 0.2401583  
1.283904 0.2551624 0.2898165 0.359063273 0.803866 0.4698304 0.9102035  
0.3610887 3.796179 0.832073 0.3697006 0.2449579 0.9718564 0.7585217  
1.658625037 2.51542 0.3202568 1.400325 0.2051417 1.222652809 0.1790683  
2.152611 1.812308 0.1717177 1.756859 0.240832 0.2455931 0.470358397  
0.2771938 0.1507692 0.390662558 0.5573898 1.250487 1.571851 0.336655  
0.8931145 0.352515842 0.813488594 0.5529023 1.757001 1.240253 0.242979492  
1.657863731 0.785652605 0.6489938 0.5708261 0.4034453 0.5788717  
1.884903 0.2482992 0.2248333 2.371659864 0.647136523 0.09858041  
1.424083661 4.11468 0.40058744 0.961371 1.209681 0.5553417 2.407434  
1.049311 0.42433 1.254448 0.1384091 0.5580497 1.329923306 2.305078  
0.06186748 0.3319143 0.5839802 2.387882163 0.343594 0.2581973  
1.082426 0.425500444 0.4621947 0.3866017 0.3022488 0.1328227  
1.201739 0.2558403 0.2502527 1.867915566 2.613256459 2.340465302  
0.1607104 0.466110981 0.118358425 1.272959 0.0474945 1.487221833  
1.003023 0.2409915 0.2121667 1.410620434 0.1429753 0.09956709  
0.1347637 0.186705747 0.2544729 0.4524076 0.2383193 0.3316395  
0.3463772 0.7092971 0.4286791 0.2362204 3.332729 0.8012468  
0.8959279 0.233941325 0.3396952 0.5653642 0.5580268 0.4762335  
0.3727392 0.2199443 0.1368606 0.095169477 0.272157043 0.179048043  
0.1971311 0.8292084 0.1201528 0.7248969 1.261025 1.593166403  
0.3168719 1.912635 0.228332 0.2424885 0.1918919 0.101514618 0.7145508  
3.200935 0.83318 1.260267 1.102623 2.564224 2.172131 1.978861797 0.2740097  
1.382171 0.311188365 0.1922652 1.111166 0.8987783 1.673791 0.7762881  
1.623276804 1.463497701 0.357332726 0.0421994 1.525284 0.4468514  
0.4292441 0.7331664 0.2995569 1.013552141 0.3249518 0.193879706  
0.06150557 0.7337293 0.8911176 1.384254 0.08852419 1.38496551  
0.265794 0.2256464 0.2105188 0.9388151 0.3358352 0.9601432  
1.185189 1.426443469 1.395412 0.322303681 0.0913319 0.1008298 1.323107455  
4.054405 0.7305812 0.3582535 0.8308573 0.1529056 1.297686 1.680838  
0.364315869 0.377897 0.1760844 0.06082064 0.1624783 1.016552 1.782461  
0.4225085  
AL049780.1 0.2909539 0.396392307 0.2003991 0.897883476 0.459935199  
0.22232666 0.3869011 0.332061217 0.1958731 0 0.162091842 0.1468222  
0.2318357 0.5541814 0.5794379 0.6797716 0.4686242 0.356682067  
0.06439149 0.5044679 0.238369515 2.177382 1.544020456 2.348879 1.469963

0.499567713 0.2761425 0 0.03471789 0.6383915 0.1044266 0.160298146  
0.2415401 0.501863106 0.4259959 0.726050266 1.540528974 0.732654146  
1.404777 1.211126 0.450349754 1.156809 0.100567501 0.4095814 0.756244995  
0.4861548 0.4950199 1.724647 0.150611664 0.08647168 0.5060415  
0.5269414 1.31423271 0.6428966 0.153232337 1.470584 0.09823728  
1.288995 0.2516727 0.3413673 0.1006427 1.586699 0.775684669 0.1678987  
0 0.5685474 0.07884014 0.5955044 1.873665 0.1600537 0.3120349  
0.979193919 0.09782707 0.07827198 0.479458119 0.1260706 0.076801543  
0.317462 0.1204221 1.094785 0.458937 0.154252 0.2212731 0.792504136  
1.599430923 0.0418344 0.05657942 0.5789275 0.358854905 0.1861424  
0.02800764 0.05529909 0.9372627 0.4073653 0.1829244 0.32670612  
0.1262915 3.840577444 0.234364283 0.1239683 0.071134569 0.08253543  
0.3211044 0.201983775 0.5689307 0.2574339 0.338313743 0.6623854  
0.58831346 1.402838836 0.06150768 0.493725854 0.2164807 2.399273 2.87142  
0.2051057 0.7116185 0.635303414 0.9924692 1.699429 0.1983576  
0.03037625 0.3135824 0.8710235 1.284874 0.2466578 0.2210126  
0.7413469 0.8271827 1.362387087 0.828464149 0.5048421 3.683217115  
0.510334209 0.1476426 0.801559575 0.6793751 0.03632922 0.110763495  
1.718423148 0.025273284 0.352221474 0.291218 0.8641411 0.4102986  
0.5601651 1.62495 0.6037409 0.65467107 0.3380287 2.143358 0.23808755  
0.5084827 0.3703038 0.121503177 0.4625721 0.2553145 0.792266972  
0.4814196 0.5031275 0.202701169 0.314976 0.5119227 0.1418474  
0.552272056 0.607525 1.515557 0.031430973 0.1429213 1.117567945 0.6653238  
0 0.28816182 0.8761988 2.122555589 0.2454607 1.808642 0.1892827  
1.061671 0.1983924 0.42965783 0.2014809 0.1953066 1.475545 0.9306504  
0.4369959 0.08427495 0.5025554 0.7271877 1.283159452 0.080919938  
4.473052 0.6539958 0.786384 0.5059568 0.582363309 0.5720948 1.006535216  
0.5966861 0.5421776 0.216438899 1.061619197 0.07397699 0.2949997  
0.151871757 0.6757611 0.3501269 1.648956 0.3996139 0.2783345  
0.8880507 0.2898268 0.04949411 0.0247196 2.033331 0.6465707  
0.06430907 0.0999946 0.405144624 1.164127 0.5631851 0.039485262  
0.06815979 0.1121377 0.5569852 0.5782121 0.2816553 0.382356053  
1.240391 0.05652088 0.5450591 0 0.09708478 0.139223972 0 0.9451973  
0.2406927 0.954522631 0.305755647 0.7232306 0.2243071 1.028521  
0.47867581 0.3769879 0.5619362 0.161514286 0.2233358 0.8944765  
0.06648348 0.462998 0.06619814 0.2548435 1.115211651 0.2831777  
0.093394421 0.497063 1.616383 0.6430792 0.08990834 1.398376 0.1765235  
0.4681245 0.288763177 0.5533929 1.038035 0.185368951 1.785073 0.05094217  
0.1418112 0.2681134 0.6546989 0.3840836 0.3443185 1.928658  
1.259213538 0.03767215 0.272664096 0.2117097 0.6512395 0.2936752  
1.828322822 1.107451819 2.445941 0.7270047 0.3153361 0.666031 0.5398941  
0.04466675 0.1478624 2.410144 0.1616572 0.793198925 0 0 0.440796057  
0 0.09010092 0.422283 0.9879516 1.370251192 1.038336 0.3412223  
6.15081192 1.063702731 0.1245926 0.05841742 0.6704668 0.5193875

0.4127169 0.7987997 1.052902 0.270101 0.5116652 0.639535859 0.07481453  
0.031906458 0.4270606 0.067786799 0.5290818 0.03479882 0.387849404  
0.8820898 0.1037043 0.1272085 0.291075472 0.07585117 0 0  
0.709384343 0.2583073 0.05480329 0.2271087 0.333770032 0.463120783  
0.965737666 0.1613882 0.08051961 0.158373 0.1155507 0.1137331  
0.1006097 0.1891685 0.06514657 0.9608206 0.1333863 0.05817666  
0.211991164 0.2763099 0.2988759 0.8901295 0.09884124 3.305612  
0.2982628 0.1443017 0.1536622 0.627472 0.3326128 1.229231312  
1.817004 0 0.6415051 0.1533274 0.5368796 0.09984856 1.858525  
0.2933837 0.2154372 1.776244 0.06714402 0.04740329 0.957863317  
0.07728171 0.1080887 0.165676301 0.04238194 1.792986 1.434215 0.2150236  
0.9641533 0.487134455 1.530905683 0.5615439 0.9990094 0.6869398  
0.045161832 0.937445801 0.516308949 0.1661691 0.3292685 0.3088452  
0.3309508 0.7601149 0.03461294 0.1057786 1.038176281 0.695912808  
0.2248711 0.504467889 2.372453 0.118253528 0.2923969 0.2678236  
0.4064272 1.740552 1.065711 0.1831793 0.4816096 0.1389186 0.04308492  
0.419514458 2.161662 0.1164285 0.1281292 1.674657 0.892877772 0.1915882  
0.1340419 0.7988309 0.3462703 0.8408116 0.1175833 0.2844013  
0.07406203 1.447395 0.1549547 0.3721094 0.323239884 2.300768252  
1.037746411 0.1290416 0.365489631 0.034939441 0.5649451 0.1906773  
0.953364405 0.7366209 0.1099448 0.2070325 0.238620152 0.2183719  
0.1362731 0.1014448 0.340714558 0.04256826 0.3004894 0.02917031 0  
0.08084936 0.401075 0.1415319 0.2155363 1.468361 0.4825177 0.9906725  
0.172648867 0.2164734 0.6976786 0.1953771 0.955973 0.5501635  
0.2264142 0.1373644 0 0.062081556 0.071882846 0.1319045 0.7316577  
0.1148524 0.7040953 0.5619758 0.357991974 0.1479248 1.618117  
0.09353978 0.2317915 0.1242569 0.024259117 0.6519828 1.511454  
0.6927489 0.2342418 0.8753415 1.420344 0.7004424 0.757428541  
0.1562604 0.5268069 0.277630083 0.04594594 0.190642 0.6701215  
0.3370275 0.2850533 0.789505402 1.153574457 0.249061154 0.03529562  
1.056681 0.2902035 0.08180205 0.07665262 0.1134565 0.99516816  
0.3623866 0 0 0.7126744 0.08518074 0.5961762 0.1306618  
1.872840102 0.1818903 0.2830963 0.7747438 0.2529586 0.2457812  
1.180977 0.8738416 0.505303829 1.194016 0.385107232 0 0.04600041  
1.545491393 4.828017 0.6425566 0.04859083 0.427649062 0.2116805  
1.040429 1.006661 0.597708409 0.06020445 0.2689409 0.02774751 0.1956917  
0.5024175 0.4318329 0.2415553  
AC083843.2 1.835434 2.058323949 0.9141828 2.123219236 0.35248704 0.891057735  
0.3438252 0.373939272 0.3369907 0.1450847 0.294082765 2.039178  
2.193745 4.141521 1.241086 1.788943 0.4707803 0.344864053 0.5413241  
1.025717 1.10781294 0.9504994 1.627448814 4.045731 1.647684 0.679773204  
0.5333971 0.3416317 0.5131396 0.9573621 3.987933 0.970263936  
1.072477 0.827456125 0.9840422 2.513935584 1.38421202 1.302367574  
3.232934 1.170758 1.225602404 2.040232 0.304098881 2.227172 0.681398199

3.367805 0.5613207 1.331858 0.645445525 0.361783 1.615926 0.9623308  
1.26354312 1.465742 0.494304778 1.745344 0.5505718 1.74466 0.4231507  
1.071644 0.452554 2.732276 0.493371672 1.201404 0.3074074 1.019446 0.5857218  
0.9568 2.29893 0.29414 0.8744013 3.262467184 0.1581066 0.1530265  
0.888158211 0.7558589 0.24424684 1.211524 1.784579 5.710515 0.89725  
0.205069 0.7465483 1.295857118 2.531911033 0.5594355 0.2013216  
0.5099233 1.125084706 0.7496749 0.3394913 0.222713 2.920991353  
0.985692 0.7319461 0.513539386 0.8954514 1.246421851 0.204224771  
0.5073523 0.311522314 0.6002661 0.4206119 0.373829877 1.552269 1.08425  
0.393547398 1.659678 2.208362953 1.56558822 0.2549328 2.023194273  
1.024224 1.683376 4.349658 0.4523215 1.998352 0.528761532 0.9934533  
2.388499 0.5141138 0.2708067 0.6086143 0.911054 0.9689173 6.677938  
1.294119 1.763783 0.9638471 1.734504176 1.35483009 0.8636228 1.306966297  
1.322331189 1.297772 1.741220357 0.9208993 0.1363696 1.460986968  
1.162247977 0.219384069 0.941524054 3.754858 2.230073 1.909139 0.9162815  
2.511114 2.716195 0.718889664 1.054984 2.64376 0.532504338 0.8422865  
1.009692 1.007195853 2.525417 1.719591 0.418948878 0.6483857 0.4328039  
0.518578044 1.325196 2.148471 1.552994 0.706267747 0.9501991 0.7873135  
0.20647028 0.3930508 1.045521878 0.4567075 0.8423472 0.864779244  
1.089246 2.384496898 1.002012 2.217348 0.5032806 0.6997845 0.5766324  
0.38360343 0.8771008 0.2094646 4.176602 2.925029 8.494177 0.07469243  
3.582444 1.724992 2.57555322 0.699259297 0.8431165 0.9461655 2.586118  
0.3791844 2.146425808 0.7903929 2.294211505 1.500971 1.038791 0.358832364  
2.009686467 0.5582701 0.4498592 0.896694282 0.8424303 0.4853867  
0.6474486 1.139612 0.4214776 2.603005 0.7706157 0.2786804 0.158517  
1.687968 1.203409 0.1357864 0.6281925 2.434740317 1.365564 1.273228  
0.305696629 0.2798388 2.967579 1.281838 0.6685746 0.6806077 1.459721485  
1.517791 0.3359255 0.9377493 0.2047666 1.02116 0.168758691 0.3520155  
1.369405 0.1858748 1.502873214 0.270989572 1.317811 0.6227185 1.595252  
1.451272933 0.7930491 1.113268 0.942258794 0.5356058 1.253022 0.2053673  
0.4797505 0.4477982 0.6510267 1.340162308 1.176463 0.419961238  
2.617915 2.574673 1.350656 0.3656148 2.042779 0.7848887 1.03835 0.693267142  
1.462752 3.118902 0.0845618 1.232714 0.1892306 0.5628169 0.9483595  
0.7167869 0.9611611 0.9663643 2.607132 1.483668905 0.2857673  
0.739197465 1.610093 1.240804 1.001897 2.226770949 0.739477386 64.14488  
6.033165 1.441244 0.1636965 0.6357994 0.22355519 0.8113514 9.059567  
0.2048002 0.585409158 0.2737206 0.2142256 0.42442834 0.2217892  
0.47208963 0.2641886 2.356438 1.071570179 1.666997 2.471388 0.51800931  
1.188840477 0.3264056 0.7012473 1.289831 1.898863 0.8760486 0.6896478  
1.82221 0.5444927 0.9769958 0.908574573 0.2223259 0.36429388  
4.475224 0.365775529 2.278411 0.2857421 0.737271234 0.9259453 0.2108581  
0.4178167 0.429241726 0.2343041 0.2075658 0.205488369 1.753882517  
3.646149 0.6664345 0.3552091 2.198337999 0.977864018 1.086875398  
0.3702147 0.5163402 1.725666 0.2277159 0.7441485 0.7926934

0.3017862 0.2496365 3.07626 0.3650897 0.4094602 0.737731285 1.03935  
0.3583835 2.857687 1.051229 20.00028 1.656067 0.6835332 0.2956125  
1.474326 0.6994107 3.249157359 2.636221 0.2749366 2.116147 0.399115  
1.358524576 0.2576773 3.197507 1.929325 0.2791908 2.661957 0.2179094  
0.86189 2.496017261 0.3525445 0.3930552 0.602467707 0.2021767  
2.664103 1.006481 0.8335621 1.944076 1.106763315 0.685899241 0.705209  
2.944973 3.618801 0.098889462 2.843839209 0.792850217 0.3664542 0.4840927  
0.7460425 0.8138189 1.056762 1.220774 0.267466 1.377295444 1.369622736  
0.2356453 1.472823571 10.74022 0.915523996 3.89868 1.02977 0.7991308  
3.959359 2.898968 2.360056 0.8797014 0.2317605 0.3335653 0.700878181  
2.841822 2.088079 0.4183359 1.005135 2.385083223 0.7824283 0.489179  
0.9549069 0.823658703 0.8888064 0.7747041 0.3669745 0.7152914  
3.020754 0.5989674 0.6001849 1.077481358 1.788975966 1.93294847  
0.4869087 0.783151986 0.338811444 6.56924 1.927303 0.884014556 1.409736  
0.3525162 0.2891152 0.737097001 0.1805307 0.3410205 0.2353526  
0.383017815 0.1364867 0.3629292 0.2486497 0.4086181 0.6796816  
1.070332 0.7172158 1.072429 2.22377 1.53955 1.984502 0.261930391 2.977344  
0.6910957 1.324177 0.9229915 0.4431487 0.608649 0.2083993 0.430501159  
0.344700072 0.348527768 0.5157629 0.9762725 0.401933 0.8442838 1.17895  
1.573989129 0.8820664 2.076418 0.3474645 0.5211417 1.323968 0.413572746  
0.5469478 1.814223 1.191843 0.4317882 7.170542 2.532496 1.958253 1.826343967  
0.237067 1.25996 0.336526022 0.1940266 0.7193436 2.21311 1.056283  
0.7381085 2.43878004 1.68396412 1.449103352 0.4471531 1.304021  
0.7035335 0.2558849 0.9381273 0.1929785 1.262487972 0.6801486  
0.054348861 0.2504313 1.681276 6.381567 0.709472 0.1737073 3.72661136  
0.7254376 0.5285645 1.853407 1.392157 0.810015 0.9494128 1.692983  
1.001072098 3.177273 0.68464466 0.3225902 0.01438938 1.651770187 5.28588  
0.8542416 0.6193874 1.149610338 0.3352173 2.003968 6.379309 0.618647686  
0.5955792 0.5828824 0.2365217 0.7983363 0.8462524 1.481073  
0.2707598  
AC110285.2 0.1515191 2.254193134 0.6261672 2.391378018 2.50057804  
0.633897348 0.637426 0.394272303 0.1020042 0.1086919 0.212718355  
0.6330898 1.466898 2.045447 0.8348472 6.251992 0.5744418 0.395137014  
0.2917366 0.2589571 0.191522453 1.787175 11.494770096 2.963246 0.8907726  
1.732654051 0.7247814 0.1787498 0.05423977 2.80434 0.63083 0.32055532  
1.098532 2.378318033 0.6245776 2.331199667 4.017830546 4.129457716 4.07584  
3.195618 0.900584403 3.509935 0.240912179 9.811633 1.047922985 10.82316  
1.716881 1.167581 0.480013326 0.1891326 1.827139 3.64163 5.797344514  
1.313443 0.849851999 9.865708 0.06139045 4.554279 0.1965942 1.37139  
0.01572341 6.211834 8.046699981 0.2623082 0.2167508 1.611524 0.2545554  
1.919918 4.532156 0.2125442 0.503742 2.362288051 0.1528353 0.1100559  
0.992501284 0.7878403 0.079991384 2.717921 0.1975422 6.020551 0.1613244  
0.1606586 5.027393 0.303904505 3.876912783 0.2352884 0.3800944  
8.025881 1.253792969 0.571927 0.2800407 0.3369358 1.485978938 1.130594

2.010006 0.265414799 0.5524545 4.860109647 0.094152187 0.2969695  
0.05556678 0.1289451 0.790117 0.441783042 5.224408 1.149111 0.30391491  
3.13765 8.035755029 0.356144029 0.2114056 2.026074235 0.5975005  
7.243357 4.103878 0.5511511 1.334114 0.723132443 14.94716 3.259772 0.3098942  
0.2467755 0.2583162 0.7994702 5.783106 1.294788 0.5265642 2.1115  
4.109539 4.716662444 2.268848952 0.8182918 4.689747389 3.805756223  
0.2767944 2.462811 0.8255239 0.1475686 0.057681948 10.434023193  
0.094762703 0.970486271 1.751635 0.8931087 3.855215 2.071179 6.788156  
2.152771 1.295537575 1.094612 2.039583 2.03836412 2.180996 1.334466 0.199315675  
2.375799 0.3191023 0.365433593 1.855234 1.371991 0.560976178 2.332493  
0.799777 0.4609451 0.933870146 4.355482 1.522129 0.186597555 0.2530575  
0.969987087 2.229012 0.1840574 0.585253894 1.312242 2.94620001 2.31624  
10.6418 0.4041457 0.9288433 0.2996169 2.528392194 0.3147737  
0.3661532 14.01139 4.472644 0.3944598 0.0965527 13.11792 6.719135  
2.086923721 0.063210622 3.081997 0.8400955 10.65621 1.277905 2.025352645  
3.977338 1.864000002 1.677965 3.371236 0.196122685 2.333433616 0.5085268  
0.2073952 1.17448301 0.3850352 0.9547696 0.6225731 4.2953 1.23337  
1.634051 0.6158032 0.1082545 0.2317167 1.881568 6.060826 0.2109872  
0.1041477 2.191006995 2.253434 1.983694 0.703241348 0.7134566 0.5466013  
5.544278 2.555164 0.5720393 8.797409753 2.918195 0.3885314 5.751211  
0.04160087 0.6825401 0.761283793 1.232351 1.554402 0.3384309 1.550901052  
0.286609287 2.229676 0.2715872 0.8034295 4.130352281 1.001246 4.071845  
1.857176918 2.233072 1.992872 0.0623203 1.37435 0.2688956 0.5043133  
4.59966017 0.6304322 0.189683173 0.8035726 10.04794 0.889862 0.512693  
6.204501 0.3073008 0.6648646 0.514293676 5.717663 7.118508 0.086880591  
3.3844 0.03183479 1.196379 0.9924085 0.228634 0.5733849 1.494247  
5.825411 3.318128249 0.270734 0.643707952 1.868761 2.432587 1.800825 1.523407642  
2.009661706 2.193091 3.140152 2.7041 0.2081081 0.2976977 0.307044661  
0.1848044 2.434939 0.1616365 1.006862134 0.1776026 0.0450497  
1.101849313 0.05212733 0.239299984 0.09676082 6.997096 1.272213503  
0.3721502 0.8365439 0.7391858 3.171312448 0.1557209 0.3559357  
6.043905 2.840037 1.068505 2.985132 2.059763 0.5626384 0.2664583 3.175067377  
0.05844138 0.139572913 1.395048 0.465974685 5.334227 0.271831 1.127975492  
2.024731 0.1188126 0.1324919 0.298833942 0.1066521 0.17012 0.114562934  
2.42114672 0.7364854 0.4024102 0.4451277 3.047579872 2.460014742  
12.516249914 0.1680912 0.389967 0.01649508 0.05054695 0.3909074  
0.5658571 0.5437898 0.549604 1.236192 0.1166981 0.1817788 1.059820362  
1.139633 1.971499 3.279005 0.5044377 4.620742 1.025147 0.2125601 0.4321198  
0.2317072 0.496546 2.348409673 1.972153 0.3138619 4.938229 0.2669198  
4.601237052 0.8735633 3.314914 4.458529 0.06731552 2.320931 0.06293947  
0.2666094 1.18648706 0.3058677 0.2617438 0.094906584 0.2780959  
7.104819 2.169917 0.239951 0.6025188 0.25635379 1.225763899 0.402526  
4.709402 3.200106 0.112890152 3.588201092 2.067905069 0.4257538 2.006224  
0.5682883 2.895449 5.000811 0.270379 0.3084814 3.695713286 2.790543658



0.09836853 4.124548803 3.157376 0.129323267 3.300465 4.365525 0.8073081  
6.590219 0.985918 0.5222805 1.010391 0.1157507 0.3500202 2.967208824  
3.906559 0.1212642 0.440388 0.2616317 2.496214197 0.4057426 0.1396091  
2.531685 2.100798675 1.078058 0.4133258 0.2962135 0.3818336 2.082249  
0.4219209 3.371811 4.986853024 4.590678475 4.421649679 0.110881 0.696625572  
0.08733744 1.602284 0.01489476 1.625619025 2.921812 0.06011839 0.9426168  
3.081783074 0.8480326 0.3690258 0.1584872 0.25284177 0.2660177  
1.0328 0.1822911 0.2297796 0.4168262 3.696937 0.619123 0.1010197  
6.579921 1.065424 3.365316 0.172626803 1.674072 0.1598643 0.9055383  
1.780732 0.1461185 0.07074541 0.07725758 0.094250908 0.35886313  
0.280756484 0.1339484 4.529411 0.2601793 2.951689 2.80952 1.044009822  
0.3697647 4.895098 0.08037548 0.2534896 0.2523647 0.098540068  
0.9815531 5.78804 0.8967478 2.05981 1.689897 2.245632 4.596066 3.957584291  
0.5273116 2.057577 0.368680333 0.0789595 3.082645 4.356844 2.932413  
0.7521278 1.446494053 3.460281107 0.295722323 0.2095409 1.884388  
0.1236505 0.1789191 1.724464 0.1861157 1.416551397 1.041728 0.260582819  
0.1326103 2.30105 1.716705 1.482151 0.1469758 2.119680029 1.155613  
0.8403347 0.7922503 1.669709 1.075155 8.51671 2.245979 2.75425565  
2.046911 0.136374714 0.009547539 0.07186646 0.93898066 6.728668 1.452654  
0.3795674 0.885254052 0.1405511 2.420133 4.826584 0.384505898 0.3009838  
0.2881141 0.2774396 0.2140104 1.424945 1.175823 0.2432017  
AC243960.1 0.06586874 1.467229608 0.3175769 0.435580377 1.046448397  
0.434115963 1.289963 2.525878992 0.3769197 0.5775095 1.188943661  
1.974391 0.1968188 0.8115727 0.4700556 1.385035 0.6610304 0.264268986  
0.240529 0.5751085 0.404731572 1.09255 1.800937628 0.9671387 0.4840483  
1.730377666 0.3657162 0.2825691 0.08252731 0.6631136 0.08274356  
0.674988775 1.285027 2.101900271 0.4117278 1.266780375 1.836321017  
2.449694888 1.135806 1.679386 1.40696769 2.594767 1.035915095 0.04636234  
0.602940982 0.1238175 0.5883518 0.3660384 0.337558391 0.513876  
0.7255604 0.2631478 0.918835491 0.302285 0.260175739 1.204401 0.2891178  
0.9989021 0.4187729 0.529932 0.239236 0.644467 0.755107479 0.441871  
0.3813926 1.006718 0.3301978 1.875162 0.7569365 0.4348126 0.3708665  
0.889292152 0.276837 0.4252778 1.170239902 0.264004 0.278192256 0.6576092  
0.1022333 0.1672969 0.467542 0.4539721 0.8694846 0.648337427  
0.872315893 0.1704752 1.210446 0.693253 2.115952604 0.2739137 0.5801667  
0.5445808 0.872319651 0.3661794 1.128478 0.510342185 1.115048 1.141171579  
0.750384212 0.3929108 0.930010387 1.008996 1.240349 0.114317206 1.309462  
0.3371924 1.421710644 0.4858597 2.154785596 1.766578385 0.3550787  
3.822672423 0.1837831 0.7688514 0.4333717 0.6965047 1.087442  
2.665910857 1.061632 0.9377836 0.654344 0.2269359 0.6486049 0.6655164  
0.862255 0.1507696 0.5816545 0.5615941 3.089872 0.777241833 0.446822392  
0.4928784 1.625986889 1.582815726 0.1704656 1.149273149 1.050987  
0.123368 0.351058743 1.592927944 2.583298198 2.555273399 0.1359776  
0.9480625 0.3284221 1.458374 0.5518059 0.1929603 1.148629485 0.58438

0.9814929 1.584671052 4.552268 0.4107801 0.350713857 1.561 0.1842387  
1.716735636 0.5994343 2.112373 0.737506484 0.898469 0.5215212 0.1252394  
2.129157671 0.6876846 1.445944 0.736466995 0.2750243 1.939704734  
1.368149 0.7001211 0.232405509 1.005489 0.568310858 3.167466 2.144921  
0.3642377 0.5253375 0.7073928 1.763014376 0.1596456 0.8527227  
0.8677077 1.053444 0.131908 0.4865122 1.010829 0.6937861 0.927343174  
0.398446402 10.82756 1.369531 0.1686587 0.3293111 0.868428184 0.8256638  
1.233823961 1.31706 0.9389838 0.610042054 0.832898222 0.1507281  
0.2379203 1.250648101 1.282373 1.40515 0.3616395 1.176086 0.5756992  
0.6701494 2.873874 0.6891023 0.2350422 1.327856 2.79579 1.14651  
0.1924202 1.142975316 0.5495887 0.4346552 1.568798818 0.2661782  
0.2284805 1.080816 5.932611 0.1721618 0.814461842 0.9663196 0.8541129  
0.3559481 0.07535343 0.9560828 0.366405588 1.470347 0.8108798  
1.062558 1.663918547 1.107514899 0.9168957 0.3332479 2.49145 0.800247765  
1.600235 1.108598 1.601548739 0.9985745 0.6471181 0.4063803 0.0196533  
0.629434 0.8077123 2.347985197 1.069807 1.141746791 0.3449275 2.123364  
0.9671069 0.3205794 0.8927467 0.3682302 0.1589673 1.157098112  
1.816589 0.742104 0.346215135 0.1952109 0.4757256 0.8307036 0.5322739  
2.419417 0.8550305 0.220858 0.3638557 0.783947873 0.1407212 1.018514007  
0.2336526 0.8544435 0.2368521 1.632652779 0.838930248 0 1.074648  
1.511059 0.03231043 1.132388 0.621891435 0.5523276 3.137372 0.812462  
3.198615978 1.32066 0.6609636 1.496869943 1.155706 0.443653178 0.7552414  
0.7716314 1.209817615 0.4459374 0.6417604 6.58748014 0.466570304  
0.5288698 0.4860208 0.2732152 1.161138 1.131225 4.275043 0.5907316  
0.2853567 0.1882324 0.748049698 0.6859558 0.433396049 0.1186549  
0.264721572 0.2874678 0.4017813 0.678798613 0.3571474 0.5751986  
0.3023852 1.129650047 1.493952 1.3751 0.6329138 1.148884323 0.1096461  
0.5769188 0.4276783 1.385300155 0.647574527 4.320363912 0.3836332  
0.2734312 0.7350047 0.9809769 0.502084 0.2904057 1.426094 0.962337  
0.4798215 0.5163716 0.3951165 0.701889494 0.4597682 0.3044799  
0.4056824 0.2573304 1.890578 1.553038 0.4760237 0.6366099 0.1549666  
0.6651487 1.311911751 0.373462 1.449704 0.6634354 0.5653035 5.039717569  
0.745952 3.458034 1.603109 0.3553431 0.7896212 0.2394104 0.3380447  
0.360125248 0.5073759 0.431285 0.412580011 0.3885894 1.051682 1.191955  
0.667597 0.9202887 0.409203625 0.400733167 1.783521 0.5752448 0.8199911  
0.460086167 0.742795596 0.398477077 1.421992 0.2683539 0.5943125  
0.3995924 0.6739861 0.4466511 0.6226244 4.255750298 4.09622011  
0.3054499 0.742338512 2.11855 0.662589299 0.5585238 1.152013 0.492914  
0.9908989 0.9863487 0.3499011 3.878391 0.1572481 0.2048329  
2.693791322 1.983958 0.8698181 1.142152 0.6113369 1.101118015 0.3831321  
0.5007024 0.8448113 0.685927798 0.4332112 0.4192578 0.2414448  
0.2766526 0.675828 0.9471605 0.7739682 2.058128951 0.881755738  
1.858116395 0.2081468 0.446811074 0.30848615 0.2803902 1.618771  
2.765721489 0.2223504 0.7747102 0.723135 4.807864645 0.2330601

0.07712678 0.6085983 0.564042304 0.1011883 0.3968269 1.089633  
1.892659 0.274551 0.7320662 0.7209282 0.2012795 1.398599 0.3386336  
1.380168 0.598012511 0 0.06317868 0.1216358 1.1487 0.439042 0.3171568  
0.4478078 0.136576547 0.822192611 0.219691949 0.5599072 1.040421  
0.3510178 0.757147 0.7384586 1.918074593 0.502328 0.7992517 0.5399974  
1.062619 0.5590915 0.247139754 0.2616575 0.6684375 0.470492 0.374996  
0.2335547 2.652788 0.4162525 0.814498677 0.5730852 1.84858 1.779507616  
0.1872297 1.456624 0.7089435 0.74832 0.914216 0.524019258 1.358013486  
0.169154033 0.2037587 1.365309 0.2060555 1.685236 1.913201 0.7994544  
0.325426131 0.5660781 0.566405711 0.9040358 0.7663724 0.1880187  
0.3872985 0.5679434 0.607719272 0.4735462 0.4806739 1.076278  
0.5261408 0.3815461 0.9143716 0.4307546 1.286945688 0.5260124  
0.078465599 0.2386553 0.3436614 0.573417852 1.040961 1.193691 0.181507  
0.653501222 0.5570947 0.5103401 0.6483274 0.453701701 0.8893325  
0.469686 0.1884518 0.841746 0.9711795 1.047452 0.3919123  
AC004148.2 0.7259836 2.360436419 0.6826289 2.448959642 2.704006024  
1.402447587 1.384481 1.516532832 0.08237181 0.1852972 0.711648425  
0.8150222 0.9213314 4.142528 3.541408 3.669065 1.22792 0.859078747  
1.047957 0.7637301 0.790488555 2.082805 3.845086882 4.007957 2.585088  
1.525228174 1.567728 0.3674274 0.3591635 2.226697 1.633646 0.590522488  
2.64776 3.324066196 1.141028 3.51867352 3.59357803 2.701869361 1.941069  
4.337732 1.568137363 3.633243 0.270670838 2.363187 1.211274625 2.892909  
4.696406 1.813193 0.554838447 0.4363741 2.858734 3.316152 2.935722065 1.68456  
0.657286078 4.801961 0.5701108 4.903644 0.2159087 1.353542 0.4570984  
4.678706 3.353375282 0.9108376 0.4334164 2.008398 0.2785034 1.714317  
3.635414 0.4240433 0.8923103 3.826745391 0.1892434 0.1086236  
1.11904486 1.161079 0.18086803 2.763541 0.698858 4.24026 0.5934744  
0.5059751 2.791603 0.908937335 6.078032578 0.6439 0.3212152 4.451478  
1.621614107 1.299443 0.2756108 0.320923 3.048118872 1.959003 1.384675  
1.90425163 0.6373222 4.990669869 0.422394715 0.2919461 0.251283414  
0.4581611 0.6481737 1.121228817 3.525041 0.5474882 0.384137973  
2.473589 4.315491296 1.386371043 0.294875 4.302089653 0.8375501 6.122105  
5.541255 0.5899805 1.917995 1.935062266 3.581032 4.341632 1.23695 0.5671801  
0.6186038 1.840644 3.164829 1.107822 1.219888 2.474923 4.800476 3.46510291  
2.834332615 1.130522 6.064052078 1.777005836 0.6482103 4.022549658 1.39994  
0.2108332 0.242216558 4.53517909 0.414505332 1.898655157 2.103385  
1.417272 2.817423 1.460534 5.410357 2.159602 1.70694165 1.597288 3.359617  
1.345673781 2.682665 1.588409 0.582500524 3.180541 0.7488995 1.047128616  
1.741109 2.38897 0.642977789 2.519369 3.186177 0.5225518 2.991934616  
2.827384 2.567599 0.317229019 0.2103628 2.151456051 3.245599 0.5945301  
0.917958212 1.16641 7.178663463 2.477406 6.662857 0.6049622 1.171031  
0.3003526 1.806868582 0.864247 0.316801 5.984243 3.142163 1.151643 0.09923397  
2.75071 4.753147 2.424119127 0.071462577 4.775055 1.16429 4.239964 0.7340681  
2.919694794 2.093105 3.809564401 2.024155 1.573238 0.376824813 2.835725753

0.3453214 0.5024357 1.322060104 2.126352 0.7951025 2.678437 2.567839  
1.372676 1.958579 3.12995 0.3996304 0.08732219 3.048725 5.905813 0.2352856  
0.5971298 1.863674921 4.463337 1.446877 0.408482982 0.9459017 1.08652  
3.463297 2.05296 0.8457072 3.569642962 3.875404 0.6702886 2.189907  
0.0335941 1.298321 0.395204269 0.9843478 1.694563 0.6680528 2.729599804  
0.462893224 3.382092 0.6579472 2.742246 1.997522478 1.797812 3.456948  
1.548636976 1.765712 2.914423 0.2096905 5.395835 0.5512072 1.350355  
2.654468434 1.741641 0.412395642 1.254199 6.568514 3.511835 0.3913309  
2.935638 0.4135929 1.331513 1.573804013 4.002818 6.42391 0.163704314  
2.473456 0.2313689 1.467066 1.805759 1.9046 0.6783891 0.9074043  
4.449306 3.156090733 0.3897259 0.955543678 3.165077 2.173532 1.880305  
2.716697774 2.772849415 5.554483 2.913447 2.81134 0 1.145911 0.574790543  
0.8643235 6.689456 0.6200028 2.264100996 0.4000665 0.1818957  
0.855023234 0.1767972 0.795705496 0.3693778 3.631207 2.825226452  
2.550599 1.503402 0.71630079 2.583307465 0.408687 0.54538 3.053582 2.348031  
2.015805 3.82954 3.488368 3.188018 0.7208328 1.622654493 0.0377547  
0.426687132 1.459615 0.513122982 2.847978 0.3951228 1.874451508 1.04437  
0.4797258 0.2674792 0.807892139 0.4210562 0.5495103 0.346925292  
1.941388469 0.6517662 0.6844897 0.8335201 2.264515424 2.467714339  
3.676341912 0.4750876 0.7110904 0.3063676 0.2332478 0.7365653  
0.5965718 0.5823226 0.6986113 2.923495 0.3365629 0.8513965  
0.829095473 1.17128 1.457984 2.151424 0.5819291 8.296887 1.204132 1.045501  
0.8607465 2.245336 0.8952057 3.766253831 4.56057 0.4181992 2.067468  
0.513996 3.425367834 1.562027 8.988144 2.961086 0.2407351 4.79151 0.2964835  
0.4545139 1.873097268 0.5199967 0.4159155 0.348364771 0.9945322  
3.166869 3.1522 0.5115488 2.228944 0.769834367 2.003833493 1.333552  
3.529008 2.389853 0.216511137 2.76946788 1.06589534 1.081745 0.8889741  
1.610521 2.681475 2.695767 0.5065491 0.4804246 4.855517405 4.17035984  
0.4198754 3.086742182 6.939583 1.178599598 1.318785 2.353959 0.8716795  
4.404713 2.789203 1.011066 1.69261 0.2103133 0.7392464 2.126677359  
5.999784 0.8813243 0.7112561 1.045818 3.912978274 1.063522 1.251404  
2.631832 1.696465391 1.316826 0.7120522 0.5980058 0.5045619 2.54125  
0.61999 2.652432 3.649833632 7.862094503 4.320462804 0.2442003 0.77465697  
0.193951759 2.017603 0.9862975 2.34369101 2.137455 0.5617653 0.4925378  
2.328085569 0.4565432 0.5157704 0.4948705 0.440595084 0.6229727  
1.238395 0.2502505 1.201223 0.6834024 3.073951 0.70709 0.5506435  
4.400813 4.017744 2.262535 0.32236697 1.727389 3.356489 1.49537 2.152362  
0.4789233 0.4713167 0.3743285 0.114166154 0.344619908 0.589472722  
0.3577859 2.169207 0.4854116 3.109028 3.723761 3.583060025 0.9611105  
3.804488 0.3717338 0.2924305 0.5486733 0.23872323 1.884383 5.835894  
1.448308 1.942 1.916818 5.977845 5.97592 1.28472335 0.8122156 1.993875  
0.621713033 0.3767781 1.635508 2.28917 3.022171 1.862064 3.015308451  
3.968284228 2.036132761 0.2671758 2.984886 0.5392002 0.5504121  
1.943785 0.4437271 1.636818264 0.8137992 0.596216538 0.2725858

1.668362 1.149874 1.765898 0.5934393 3.171394114 1.254461 0.6428828  
1.599422 1.27654 0.744192 3.647355 1.948842 2.287903446 1.840229 0.809758499  
0.07709958 0.04642766 2.173674011 7.048243 1.277975 1.066667 1.847877553  
0.3738816 3.928124 4.002733 1.108933603 0.721568 0.5913487 0.1750327  
0.1810501 1.443239 2.319311 1.456021  
AL355075.2 0.396866 1.175991487 0.2391793 1.224728089 0.51757143 0.568607411  
0.2158934 0.475583911 0 0 0.431137171 0.480643 0.6522197 1.488203  
0.7244994 0.7558858 0.4794084 0.265374714 0.1646833 0.5529397  
0.313527865 0.964137 0.412057124 2.132603 0.7291105 0.357744829 0.5367447  
0 0.213101 0.307333 0.4985386 0.360771433 0.7412957 0.812902739  
0.4022761 1.485517072 0.900560273 0.749514388 0.7185521 1.548746  
0.644998832 1.837432 0.102881816 0.5307421 0.807284997 1.450582 1.215388  
0.294056 0.369786294 0.1326924 1.035374 1.300104 1.265389702 0.6576913  
0.195948255 1.327435 0.06699865 2.062516 0.1544786 0.598668 0.1029587  
0.7638651 1.269656245 0.3005844 0.1351724 0.9139917 0.3226178  
0.8861214 1.850687 0.04093425 0.3192156 1.980159348 0 0 0.245245837  
0.2794388 0.157137885 0.6170584 0.2155882 0.1119979 0.1173746  
0.3156034 0.4850681 0.073703789 0.842910439 0.1283913 0 1.028645  
0.667478313 0.5712781 0.1146087 0.05657166 1.988687569 0.7844513  
0.5614018 0.167112231 0.1291977 0.785791787 0.342510861 0.1690949  
0.145543113 0.04221739 0.3695556 0 1.196381 0.3386032 0.302836805  
2.032886 4.470900978 0.448475543 0.1887694 1.279555623 0.4060145  
0.8642556 0.4895831 0.2517908 0.99272 1.9497701 1.066074 1.231463  
0.1739334 0.06215057 0.2916353 0.9467598 0.5320362 0.9084026  
0.7065582 1.19595 2.538655 1.170740837 0.747819903 0.2259512 0.847794902  
1.183377484 0.2114563 1.503343428 0.8108441 0.07433049 0 0.902740556  
0.129274434 1.27752296 0.07447992 0.3740115 0.6595924 0.4297919  
1.337103 1.198938 1.088322174 0.565867 1.428566 1.022979519 1.74971 0.6566308  
0.403972644 1.952021 0.09794623 0.385951932 0.9302746 0.32754 0.236989531  
0.6444488 0.7419131 0.2031563 1.229665063 1.243011 0.6275567  
0.128617121 0.1218419 1.439693526 0.6428216 0.2152195 0.221094869  
0.4018176 3.173586093 0.9039939 1.565607 0.2259116 0.2792835  
0.03382632 0.65931803 0.3091762 0.05708604 2.577198 1.224086 0.9437772  
0.05747622 1.937839 1.31072 0.875125484 0.041391056 1.290663 0.2601845  
0.5504342 0.3450668 0.67347345 1.219292 1.607333714 1.288659 0.5546545  
0.199277739 1.310749716 0.07567939 0.2263413 1.04872532 0.1626617  
0.4233087 1.230033 1.689748 0.7247921 1.716031 1.067387 0.3544316 0  
1.720102 1.71977 0.03289449 0.1022957 0.510114506 2.178506 0.6808991  
0.201969594 0.1743208 0.527704 1.628008 0.4647643 0.2305095 0.924548279  
0.9330411 0.404751 1.20099 0 0.94353 0.106820903 0.04385641 0.3053522  
0.09233689 0.846290149 0 1.208461 0.4302543 1.05219 1.243062689  
1.735485 0.6022425 0.429600969 0.9139011 1.074202 0.06801343 1.332148  
0.1015823 0.3476108 1.483138173 0.4345415 0.143315497 0.5527193  
2.523885 1.221774 0.1609604 0.2861113 0.2837777 0.4788973 0.590816709

1.320965 1.061923 0.189634764 1.083311 0.02605724 0.326418 0.8650477  
0.1969898 0.1309741 0.2739661 1.190089 0.901733879 0.07707816  
0.278938792 1.028763 0.9084902 0.2628792 2.112856092 0.653617564  
6.962724 0.3499929 1.899713 0 0.4548505 0.182778583 0.2521085  
6.246206 0.1323018 0.35501045 0.09181284 0 0.112734975 0.1706679  
0.230435931 0.02880005 1.482341 1.161478312 0.7810522 0.7787051 0  
1.360226558 0 0.239047 1.200318 0.6198966 0.5730054 1.470928 1.732778  
0.4912296 0.26172 0.508863609 0.0382681 0.065281413 0.3574541  
0.138693492 1.623772 0.07119925 0.274690252 0.7288526 0.2829087  
0.1735145 0 0.1551934 0.1392457 0.093771439 1.116475519 0.363346  
0.1681934 0.232335 1.100230782 1.644289653 1.030916614 0.2201362  
0.1647451 0.2700293 0.1654937 0.2327007 0.3345061 0.232226  
0.1332915 1.850224 0.163747 0.2678195 0.650608865 0.6218708 0.2378085  
1.174212 0.2359369 8.899165 1.322215 0.2108892 0.4401555 0.7294452  
0.2646522 1.437164642 1.516404 0.1027602 1.312536 0.1120399 1.137700181  
0 0.9506471 1.009546 0.12594 1.784081 0.1030338 0.1939766 1.049899496  
0.05270677 0.1105761 0.084744468 0.173429 1.667498 1.737497 0.1885473  
0.7997359 0.472115996 0.42416176 0.6420507 2.221737 1.724927 0.046201121  
0.839141469 0.288103929 0.169993 0.4378996 0.9127517 0.3761853  
0.5184047 0.2478663 0.2524965 2.351720598 0.177981884 0.09201838  
1.935288686 5.483334 0.120974844 0.7478143 0.6849673 0.4157802  
2.356685 1.646042 0.3279408 0.950193 0.04737182 0.2644585 1.131444376  
1.314891 1.032268 0.4587724 0.4282987 2.115300389 0.3702168 0.5485062  
1.470985 0.265679147 0.4449107 0.3608675 0.09698202 0.07576639  
0.9254396 0.2491038 0.09516815 1.157374607 1.210481898 2.268022609  
0.0660056 0.336510432 0.035743487 0.5334885 1.365457 0.835974646  
0.8163702 0.2811873 0.3025669 0.773019467 0.03191389 0.1394091  
0.0345931 0 0.2612872 0.4098726 0.149208 0.4355491 0.08270991  
1.025762 0.2606201 0.3307445 0.7693946 0.8227028 1.01347 0.105973175  
0.5536374 1.665379 0.7661805 0.5266005 0.2814121 0.05790615 0 0  
0.254040845 0.330916743 0.20241 1.029181 0.08812161 1.260522 1.249801  
1.220767612 0.5674835 1.881084 0.09569237 0.296407 0.1588955 0  
1.333973 0.6832206 0.7593116 0.3423319 0.6396324 1.888939 2.82146  
0.774858905 0.1598564 1.212593 0.319521443 0.07050492 0.828874 0.7119098  
0.928263 0.5184233 1.762197679 2.045543326 0.254792686 0 1.397387  
0.2698926 0.1952639 0.1960415 0.2031179 0.791831848 0.5190165 0  
0.1184111 1.012604 0.3485639 1.087205 0.08020121 2.171397458 0.2481014  
0.2534097 0.8285986 0.5822547 0.2155176 0.9665237 1.182322  
1.665670291 0.8583466 0.341440262 0.1250368 0 0.819807382 2.861555  
0.6186762 0.3479632 0.820294421 0.2436208 2.444113 2.450278 0.251778967  
0.2463596 0.1179128 0 0.1334634 0.5139794 1.041316 0.2745713  
AC018752.1 0.3069611 0.940950671 1.34783 1.420922394 0.545893962 1.781176515  
0.6679422 1.812957529 0.154987 0.1834982 0.384771411 0.4182294  
2.270104 2.055482 0.9933891 0.3507897 0.08557028 0.692743944 2.445626

1.111963 2.344187302 0.5400071 0 0.7666639 0 0.237173409 3.277516  
1.851788 1.73067 0.3565659 0.6610304 1.369848813 0.7644862 0.198552636  
1.711301 2.139502659 0.149260683 1.003364108 1.429131 0.7985983 1.069034125  
2.529227 1.511929852 0.6481725 0.780506126 1.442534 0.2350143 0  
2.288127487 3.386878 1.735116 0.735792 1.468097761 0.8217457 0.818416888  
0.6160327 1.010509 0.4707382 2.270186 0.6945711 4.061371 0.6646739 0  
1.394945 2.27398 2.217216 3.68061 1.734873 2.607261 2.184617 3.333169 1.459505228  
1.083696 2.972816 0.640198781 1.5462 0.303850766 1.507174 3.430275 0  
1.225596 0.9764299 1.425692 2.223278371 1.380620867 1.092365 0.2014612  
0.8679476 0.851844895 2.798461 0.9307783 1.247048 2.307263733 0.9669981  
1.157929 0.232659164 5.296271 0 1.907419709 1.667555 0.928720497 0.5877645  
0.6669542 0.799110564 1.575607 3.230063 1.806940272 1.572362 3.391574062  
0.41625497 2.190091 1.32826635 0.9421113 0.240649 0 0.7790033  
1.458881 3.98562575 0.235591 0.8404334 0.4035931 1.297921 2.097792  
2.003011 0.8714333 1.288129 1.049273 1.962853 0.9817775 0.388081914  
1.330344986 1.198387 0.109289634 1.211424409 1.401888 2.748389545 1.343909  
2.75961 0.262928878 0.110247825 0.95989405 0.836098547 1.209756 1.735704  
0.9739613 0.4432374 0.670832 1.601758 0.647520537 1.823655 1.156335  
1.13033798 0.7681095 1.758044 1.081584711 0.7549076 3.106068 0.26866751  
1.650693 0.6514457 2.19963099 1.719677 0.2025325 1.952949 2.236370651  
2.563795 0.4282868 1.044545843 0.9047059 3.24239373 0.2632228  
1.098664 1.710086529 0.932373 0.678258755 0.5826714 1.717332 0.2246583  
1.368098 0.392451 0.084992993 3.188484 0.8610016 1.36688 2.52476 0.6915567  
1.467039 1.192959 0.739795 2.7335417 0.480216622 0 3.104893 0.09824777  
0.9007751 2.824916828 0.3395077 0.990685206 1.180338 0.3861041  
1.233071318 1.477274923 0.7024223 0 0.630894448 0.09435956 0.6800126  
0.2446418 2.150155 2.342506 2.498421 0.6191882 0.4699537 1.173581  
0.9282103 0.5116069 1.14492 2.373658 3.107117363 1.954592 0.3646039  
1.218484519 0.08089839 1.490669 0.9444027 0.1960788 2.54064 0.330047855  
0.6928057 1.878359 0.1990545 0.1053485 1.037063 0.330487971 0.4070556  
0.3542679 1.142706 1.359499708 1.935462931 1.888475 3.194743 0.9765959  
2.884388181 1.342333 0.2540794 0.996841083 2.385681 1.107807 1.735993  
0.2060734 2.435674 0.806592 1.853091982 1.344407 1.330190436 1.795533  
0.8077785 1.744609 1.814097 0.2655557 2.933204 0.1010207 0.616915893  
0.9633335 0.2593762 0.806714877 0.5745604 2.539442 1.683148 1.811418  
0.3656742 0.9117324 2.270385 1.017383 0.797094395 0.3577025 2.373236521  
1.758938 2.52966 1.917086 2.009281418 0.303329316 15.90378 1.827269 2.744649 0  
1.356981 1.484410528 2.339958 22.69396 0.8442271 1.176803017 2.130414  
1.368986 0.980958458 1.821673 3.635965782 0.4009639 1.954322 1.858676374  
1.014913 1.308444 10.10818644 3.261462319 1.478782 1.45604 2.387318 2.979544  
1.119659 1.061861 1.412685 0.641162 0.607292 0.50604051 2.397515 1.363304076  
0.2764775 2.81594918 1.255927 2.395544 0.49574627 0.241603 0.9026298  
0.2013105 0.197414571 1.440436 1.130864 0.725287181 2.849722466 0.383229  
0.5203652 2.254449 0.176066392 2.134032005 0 1.277004 1.815795 1.127831

1.261746 1.709861 2.03002 1.167518 0.3866101 0.9391458 2.533044 2.071484  
2.641914153 1.574162 0.07882974 2.335396 1.094931 28.90933 1.416024 2.740331  
1.240189 2.166523 1.403648 1.750759548 0.4540188 0.4768873 1.315142  
1.403871 0.546187499 0 0.09191127 2.279226 0.8766889 0.5366358  
1.593856 2.250506 1.380498917 1.161852 1.603621 2.031947451 0.4024227  
1.547697 1.34389 1.822929 1.298989 1.82582076 0.075709231 1.646629 2.165223  
0.4941359 2.894522681 1.11264805 0.557094167 1.49891 1.563226 1.792102  
0.3491584 0.8019335 1.971929 0.9206843 1.232204372 0.275324727  
0.8540735 1.297290604 21.48388 1.543897396 3.470439 1.059593 4.823857  
1.093685 1.736117 2.174143 1.551538 0.439684 2.147762 0.814776315 0.6934222  
3.86927 0.7603786 1.291965 2.788817261 0.8590468 0.9545605 3.196542  
0.136995288 0.3441219 0.7675733 1.012662 1.318556 2.720014 1.839147  
0.1104135 0.287738416 0.078021891 0.783805376 1.301848 1.995466931  
1.658775416 1.031584 4.186801 0.905233387 1.505722 1.304928 0.1404146  
0.660838819 1.332947 1.725244 1.765927 0.202195897 0.2020959 0.5547871  
1.592614 0.2756299 1.535353 0.5950414 1.948606 0.5755918 0.08501401  
0.6872364 1.145673 2.540955503 0.9634904 0.2208187 1.855134 2.007436  
1.305971 1.209283 0.717362 1.909419689 2.726314557 1.876979758 1.409009  
1.628249 1.499493 0 2.900023 1.416327472 2.370208 1.396751 1.332261 2.200894  
0.6636587 2.188266558 1.618016 0.3337552 2.114277 0.9532115 0.8163076  
0.7417505 0.3117564 2.796847783 1.038601 0.7294742 0.741413833  
2.672113 1.810174 1.651907 1.230818 0.4511037 2.725988642 1.64300362 0  
0.1675685 1.407114 2.379771 1.941806 1.273699 1.211946 1.924850604 0.8602284  
0 2.106491 0.3759415 1.314306 1.907437 0 1.778288952 0.1439229  
1.848028 1.421104 1.050822 0 0.224271 2.743447 1.19948336 0.6894337  
1.950212935 1.160536 0 1.902271499 1.273409 0.5383384 1.038098 1.903401618  
1.067779 1.189142 3.543198 0.500764269 3.644269 1.276816 0.3293333 0.6967954  
2.477005 1.317959 2.102469  
Z68871.1 0.7394972 0.239514716 0.4324588 0.682780891 0.357312411 0.719667279  
1.168899 0.673588963 0.4226917 0.1834982 0.307817129 1.089931 1.063134  
1.345406 0.6252099 0.2551198 0.2800482 0.475824123 0.666989 0.5754217  
0.558489765 0.3226017 0.347684563 0.8997212 0.2883783 0.344979505  
1.167988 0.6958234 0.6892711 0.5834715 1.382154 0.456616271 0.4285756  
0.270753595 0.6505772 0.832028812 0.339228826 0.462155589 0.9816255  
0.3629992 0.958891215 1.064246 0.289364565 0.8485167 0.468303675  
0.7343812 0.4272987 0.03101473 0.364020282 0.5224935 0.9342934  
0.2140486 0.633951306 0.2347845 0.347207165 0.2986825 0.8055804  
0.5277974 0.4670717 0.3578094 0.2823413 0.2819828 0.803480607  
0.4166719 0.5132493 0.8237879 0.873365 0.5023538 1.157234 1.018912  
1.5263 0.982831804 0.6192549 0.3716019 0.310399409 0.8252448  
1.005469806 0.8906027 0.4547713 0.09450134 0.5199497 1.109579  
0.7367213 0.481969437 0.397451462 0.1805562 0.2075661 0.328768  
0.352002023 0.6159293 0.5560494 0.4296051 1.018791778 1.003196  
0.9342382 0.18330722 3.906341 0 0.505755226 0.4637051 0.122806016



0.3027877 0.4157636 0.174351396 1.159537 0.349196 0.346786517 0.8119103  
1.088205581 0.315344674 0.4778381 0.497212003 0.5450231 0.07292395  
0.1147498 0.3895017 0.4746597 0.920513072 0.1285042 0.3871087  
0.1467611 0.3539785 0.4552393 0.7871068 0.2904778 5.408011  
0.5484838 0.8491339 0.928226 0.540962668 0.799258648 0.5174855  
0.099354213 1.071927053 0.5862439 1.037853395 0.4561147 0.5801452  
0.175285919 0.360811062 0.894446729 0.690990534 1.791068 0.7746117  
0.9486636 0.1611772 0.3811546 0.6590966 0.518016429 0.7029359  
0.8970357 1.17144118 0.6982814 0.9482785 0.393303531 0.5115903  
0.7989 0.27680895 0.3693858 0.1381855 0.787367911 0.8972229  
0.6075976 0.5999657 1.065606078 0.2476393 0.2647591 0.406965913  
0.5448797 0.446610707 0.4307282 0.2542364 0.357563547 0.2086429  
0.933706857 0.2330685 0.6725215 0.2178505 0.170194 0.1569804  
0.123626172 0.7246555 0.2287976 0.68344 0.8989676 1.173551 0.2303614  
1.017769 0.3736338 0.908813864 0.279398762 0.4950149 0.7213387  
0.1964955 0.2729621 1.027242483 0.6790154 0.635733822 0.4435209  
0.2574028 0.401682323 0.647789004 0.1436773 0.111406 0.655474751  
0.1372503 0.3434407 1.126835 1.43727 0.5897217 1.618295 0.4002833  
0.2136153 0.1707027 0.7425682 0.8557788 0.2498007 0.3884168  
1.022255063 0.9313418 0.2651665 0.920254042 0.2059232 0.9195686  
0.6524964 0.2852056 0.559184 0.285041329 0.3621484 0.6464482  
0.1990545 0.07661708 0.5447202 0.195288347 0.1110152 0.1288247  
0.389559 0.617954413 0.175951176 1.217364 0.7139766 0.4143134 1.017084538  
0.7484523 0.1616869 0.669207999 0.8032597 0.654613 0.2582469  
0.6119757 0.7142739 0.4766226 0.738027975 0.4583205 0.161235204  
0.7182131 0.5691166 0.8524793 0.3395369 0.1448486 0.87071  
0.183674 0.710387998 0.6846833 0.3301151 0.106673042 0.4048039  
0.4727101 0.9792861 0.5429802 0.299188 5.083599 0.8586184 0.6342127  
0.398547198 0.2113697 0.849919415 0.6167704 0.7154594 0.3802484  
0.789099611 0.220603139 5.87499 0.3322307 1.451715 0 0.5893959  
0.212058647 0.7126236 7.385507 0.753525 0.534910462 0.5035525 0.2644632  
0.796657172 0.3456139 0.836077693 0.145805 1.037567 0.608294086 0.5931309  
0.6230683 0 0.592993149 0.3226433 0.9076614 0.7668353 0.6538185  
0.4834891 0.7171007 0.5137035 0.1295277 0.1472223 0.352694901  
0.1775937 0.605912923 0.3853928 0.731415371 0.9742951 0.3454389  
0.167394844 0.1757113 0.2834705 0.1830096 0.035893558 0.8184294  
0.1321789 0.184618555 0.847851312 0.2508408 0.5558447 1.176234  
0.560211248 0.517341092 0.561787378 0.650111 0.2432645 0.1367068  
0.3590739 0.5072313 1.031294 0.2612628 0.435815 0.6342284 0.6908303  
0.6151681 0.663337753 0.3696895 0.2579882 1.101983 0.4976958  
5.143608 3.389877 0.8274375 0.3183372 0.7262776 0.2552087 0.651797927  
0.6191166 0.1950903 0.6166695 0.727933 0.364124999 0.0215472  
0.6183122 0.7367196 0.2125307 0.5296665 0.5216255 0.8081361  
0.649646549 0.333546 0.699762 0.786560303 0.4024227 1.055248 0.9610847

|             |             |             |             |             |             |
|-------------|-------------|-------------|-------------|-------------|-------------|
| 0.4375029   | 0.3823862   | 0.697131563 | 0.206479722 | 0.8268785   | 1.256017    |
| 1.141005    | 0.428818175 | 0.708048759 | 0.202579697 | 0.2868726   | 0.7105574   |
| 0.488755    | 0.1587084   | 0.9295138   | 0.627432    | 0.3043584   | 0.752124747 |
| 0.3299829   | 1.070491547 | 7.546854    | 0.433822409 | 1.198879    | 0.346776    |
| 0.9279752   | 0.9108978   | 0.7313026   | 0.8314461   | 0.05995691  | 0.706623    |
| 0.806546251 | 0.6555992   | 0.4020021   | 0.1659008   | 0.4155972   | 1.460326129 |
| 0.523697    | 0.5785215   | 0.9358137   | 0.161903523 | 0.2252434   | 0.3806148   |
| 0.3068672   | 0.1917899   | 0.9500526   | 0.9554008   | 0.04015038  | 0.488283373 |
| 0.127672186 | 0.427530205 | 0.4316288   | 0.615203243 | 0.286515754 | 0.5251699   |
| 0.555497    | 0.399713443 | 1.404163    | 0.3914783   | 0.1531795   | 1.012714034 |
| 0.470521    | 0.4378332   | 0.128670116 | 0.2755854   | 0.4034815   | 0.6672612   |
| 0.2004581   | 0.5059686   | 0.6058604   | 0.354292    | 0.4069841   | 0.2318564   |
| 1.263404    | 0.6578028   | 0.536506734 | 0.9342937   | 0.7628282   | 0.7027021   |
| 0.5078099   | 0.5698781   | 0.3542344   | 0.2490017   | 0.271224388 | 0.723444649 |
| 0.480879112 | 0.4696697   | 0.5723543   | 0.5204853   | 0           | 1.128372    |
| 1.037465    | 0.5555258   | 0.5652016   | 0.4501829   | 0.4156247   | 0.355985947 |
| 2.251153    | 0.1365362   | 0.5339084   | 0.3466223   | 1.05243     | 0.72336     |
| 0.72645397  | 0.3372081   | 0.5115793   | 0.674012576 | 0.6643102   | 1.193069    |
| 0.7898007   | 1.186061    | 0.3964245   | 0.975780025 | 0.879587797 | 0.236487192 |
| 0.182802    | 0.8787513   | 0.5465503   | 0.4707408   | 0.5789539   | 0.416224    |
| 0.3128103   | 0           | 0.3663463   | 0.4613827   | 1.305115    | 1.700471    |
| 0.826275674 | 0.1570068   | 0.5192806   | 0.668755    | 0.8051754   | 0.06061632  |
| 0.3669889   | 0.9854509   | 0.533103716 | 0.3481988   | 0.554037766 | 0.276946    |
| 0.01985367  | 0.839964038 | 0.8765024   | 0.2773258   | 0.3565186   | 0.646002974 |
| 0.342603    | 0.7151483   | 1.033745    | 0.212445448 | 1.026372    | 0.3979687   |
| 0.5208369   | 0.7339273   | 0.8786392   | 0.6718635   |             |             |

## Supplementary File S4

| geneKM     | B        | SE           | HR          | HR.95L      | HR.95H      | pvalue                  |
|------------|----------|--------------|-------------|-------------|-------------|-------------------------|
| AC010326.3 | 6.75E-06 | 0.139109684  | 0.023446039 | 1.149250148 | 1.097633273 | 1.203294337<br>2.97E-09 |
| AL021707.6 | 2.77E-06 | 0.123244945  | 0.027037479 | 1.131161459 | 1.072778981 | 1.192721213<br>5.16E-06 |
| AC005785.1 | 4.11E-09 | 0.483110179  | 0.080616997 | 1.621108507 | 1.384174271 | 1.898599652<br>2.06E-09 |
| AC098484.1 | 7.27E-07 | -0.632446095 | 0.115178023 | 0.531290623 | 0.42392833  | 0.665843035<br>4.00E-08 |
| AL513218.1 | 2.34E-08 | 0.525038523  | 0.086986835 | 1.690523971 | 1.425535395 | 2.004770494<br>1.58E-09 |
| AC092611.2 | 9.83E-06 | -0.467912625 | 0.092038376 | 0.626308245 | 0.522931642 | 0.750121022<br>3.70E-07 |
| HM13-IT1   | 5.83E-06 | 0.279395621  | 0.05572196  | 1.322330383 | 1.185521292 | 1.474927234<br>5.33E-07 |

|                  |            |              |             |             |             |             |          |
|------------------|------------|--------------|-------------|-------------|-------------|-------------|----------|
| HOTAIRM1         | 1.01E-07   | 0.110563848  | 0.016931832 | 1.116907659 | 1.080450481 | 1.154594996 | 6.58E-11 |
| U62317.22.35E-06 | 0.06152333 | 0.009906589  | 1.063455306 | 1.043005837 | 1.084305713 | 5.29E-10    |          |
| LINC00115        | 4.20E-06   | 0.478041955  | 0.098162784 | 1.612913152 | 1.33062191  | 1.95509244  | 1.12E-06 |
| AC084876.1       | 8.77E-07   | 0.497740713  | 0.073388576 | 1.645000541 | 1.424615207 | 1.899479079 | 1.18E-11 |
| AC129510.1       | 8.94E-06   | 0.367597641  | 0.069902285 | 1.44426081  | 1.259344917 | 1.656328826 | 1.45E-07 |
| AL391244.3       | 4.02E-06   | 0.475105428  | 0.082574506 | 1.608183736 | 1.367880374 | 1.890702563 | 8.73E-09 |
| AC010973.2       | 1.83E-07   | 0.371191779  | 0.065723766 | 1.449461023 | 1.274272674 | 1.648734452 | 1.63E-08 |
| AC027796.4       | 1.35E-06   | 0.260212897  | 0.04672168  | 1.297206229 | 1.183694035 | 1.421603852 | 2.56E-08 |
| LINC01507        | 5.09E-07   | -0.258187754 | 0.047274549 | 0.772450188 | 0.704093466 | 0.847443304 | 4.72E-08 |
| AC016773.1       | 5.30E-06   | 0.537821424  | 0.069760112 | 1.71227248  | 1.493457822 | 1.963146869 | 1.26E-14 |
| AC026401.3       | 5.03E-09   | 0.203053331  | 0.024290214 | 1.225137804 | 1.168178135 | 1.284874793 | 6.30E-17 |
| AC011462.4       | 1.72E-07   | 0.186627604  | 0.034400725 | 1.205178398 | 1.126599071 | 1.289238568 | 5.79E-08 |
| AC048341.2       | 4.60E-06   | 0.091283335  | 0.016747702 | 1.095579377 | 1.060200926 | 1.132138392 | 5.02E-08 |
